# Supplementary material for: De Novo Assembly and Transcriptome Analysis of Bulb Onion (Allium cepa L.) during Cold Acclimation Using Contrasting Genotypes
Source: PLoS One. 2016 Sep 14;11(9):e0161987. doi: 10.1371/journal.pone.0161987 (PMC5023330; doi:10.1371/journal.pone.0161987)
Supplement: S1 Table — (XLSX) [file pone.0161987.s007.xlsx]

## Sheet: Sheet1
Supplementary Table S1. Validation of candidate genes with qPCR analysis using CT libraries of cold and freezing stresses.
DEG profiles	Gene Id	FDR	Up-Down regulation	Up-Down regulation	Annotated description	Top similarity (%)	Forward primer	Reverse primer	Product size	Gene Sequence
Cold (CT25°C vs CT2°C)	comp22573	0.000460036	-3.59135	3.59135	LOC100284898 precursor [Zea RING zinc finger protein-like	0.6	CTCTGTGGATTCCAACTTTCTC	GAACGCTGTAGGATTCATGTAG	209	>comp22573_c0_seq1gcagtactaaccttctaaatttatttcaaagttaaatcatagacaaattacaagaactgctgatttttataaacagttcttcaaccatgtatctttgcagtcatttctccatttttgcatatcagtcttgtacatgggtcgtaatcttctctgtggattccaactttctcttaatctttacattctacacaagtctgtcaacattttcagtaaatgaagttttgaaataaaggtataaaacatgtaaatgtaatatattgtaatctgaatcatttcaattatagtaaaagaattatttataaatatcctgtaccatgaacaagataaactaataactacatgaatcctacagcgttccagactaaaaataccaaagccttt…
	comp90601	0.000547929	3.76486	-3.76486	PREDICTED: probable alpha,alpha-trehalose-phosphate synthase [UDP-forming]	0.76	GGACTGCCAATCTTCTGTATC	TCATCATCACTATCGGTGTTCC	166	>comp90601_c0_seq1atattattgaaaaaaaaagatgcatttaatccggtaatgttcttaatttggactgccaatcttctgtatcatcatgttttgtgcaatgatgtgtcggtgtttcagtagcagattaaaagtaaaggtggaagtgagagaactttcatcacgaattctttgcgaatgactttccctcgttcaagtactttggattggaacaccgatagtgatgatgatatagacagtatggatgatgatgataagaaagggagcaacataattgcagcaaactttcttcctattcttcaaagaaaaagtgaagaaactggaaaatggtgctttgattgggacaaggattctcttttttttcatctaaaagacagcttcccttctgaatccaaa…
	comp99946	0.00136111	2.92613	-2.92613	NA	-	AATGCTGACTTGGCCTGAAA	CTGTTACTTCAAGAGGTGCTAC	220	>comp99946_c2_seq5gaaatgctgacttggcctgaaaaagtcaaatttgccatcatactttattccttttttactatgtgtggtatacaacatcagtttattaccatgaaaccactaatgtaataatgctctattctgcgtttcttcatttaaaattttttttatcgagtttatttgatgtatttccaaggttctctaaagctatacttcttgaagtagcacctcttgaagtaacaggttagtattttttctttacatattattcatgcaaatagcattataacttttcttcacctgaatatttaacactcaccttctagctttaaacaatggttattattttaaccttctttttatgtttggttgattacatgtaaatttagtactaggtataca…
	comp88087	0.00187164	-2.74472	2.74472	PREDICTED: CBL-interacting protein kinase 5 isoform 1	0.86	CTCAGCGTCTATCCCTAACT	GGTTCGATTTGTCAGGTCTT	203	>comp88087_c0_seq1ttgggaattctttaagtatttcatttgttttataaatctcaattgcatacagatagataactatacaaggacacacatatttaatttgagatcagtcaaaacatgtatacaaacaactgatatcagtacatagcaaaatcggaaagcttctataaaagtgggggtagaggcttggagagggaatacataaacctacaatcaagaaggatcaaacaagaaaagtgatagatgggaattaataaatcgttacttttccacacatttgtcaaaatcaaggctgtttatgagatgaacttgcactaacttcaccttcccatgcccaaacaatgtccttaagtgagggcttcaactctttattgcagaaatgttgatattccaagg…
	comp93782	0.00192874	-2.83092	2.83092	NA		TTCATTTGTAACGAGCGTGC	GTCATTGTCCGTTCTTTGTG	291	>comp93782_c0_seq2agatgcagcaagagttgcagactgcgatggacgaactatcttaggccagggatcaagagaggaaactttactctacatgaagagaaattgatcgtcaatctccaatctttgctaggcaacaagtaatttcttcttagttaatctttttagttttagatcaactagtatatgtcagaatatagagaagcattttgtacagattgatgtcgtaacttgttatttagttatttttccttttattttttattattttttcataacaacggtgatacttaatttaagtagagcactcattatggtgtttcgagatcaaaccaaagacttttagaatcacgatctagagatcttactacttaagctagtggtacattttttcattaa…
	comp97901	0.00195988	-2.74133	2.74133	hypothetical protein VITISV_032171	0.77	CTAGCGATGTTGGAAAGCTG	CTTTGGTCAGCACGTAACTC	183	>comp97901_c1_seq2cgacgtcgccgcccagcgcttccgtggccgccacgccgtcaccaacttcaaaccattgtccgaatcctccgactccgacgtctccgagctcgagttcctcgacctccactccaagtccgacatcgtcgacatgctgcgtaaacatacctactgcgacgagctgctgcataataaaaggaaggctttcaaaagtaaaacgagcgccgttaaacatcataacagctttatcggcttggttcagcgggagcaacttttcgagaaaaccgtgacgcctagcgatgttggaaagctgaacaggctggtgatcccgaagcagcatgccgagaaacattttcagtataatcatgatggtggcagtaatggaattttgatgaatttcga…
Cold & Freezing (CT25°C vs CT-5°C)	comp69263	1.92405e-08	-6.55638	6.55638	PREDICTED: calmodulin-like protein 11-like	0.95	GATAAAGGAGGCAGACATGG	CTACAACACACATGGGAACT	210	>comp69263_c0_seq1tgacaaggatggagatggttgcattactttggaggaacttgctacagtgattcaatcgcttggtcagaatccgaatatagaagaattaaaagatatgataagagaagtagatgccgatggaaatgggacgattgaatttgaggagttcttgaacctaatgtcaaagaaagtgaaggaaactgatgcagaagaagaactaaaagaagcttttaaggtctttgataaagatcaaaatggcttcatatcagcaactgagcttcgaaacgttatgattagtctgggggagaaattgagcgaggaagaagtggtgcagatgataaaggaggcagacatggatggcgatggccaagttaactatgaagagttcatgagaatgatgat…
	comp94815	0.000190418	-3.28114	3.28114	hypothetical protein	0.81	CCGATTCTGAAGGAGAAGAC	GTACACAGCTTCCTACCTATG	205	>comp94815_c0_seq1aacgaagtcaaactcgataaaattccagttttgccgcattattatattcctaattttttttcatttatagttcaactaaggggccaaaaaaatctgagaataagaagagctctagattgaaaatagagaaaatattattacttgcaaggattccgcaatcaatggaattacttcgaatgttatcaaatccatccattaactgggaagaagaatcattcccagatcattctgatttcattctacttcctttcttggttgtcttctttcctgtagttagatacttgctcgatagatttgtatttgagaaagtagcacggaggcttatttttggaagagatcatgtaaaattggactttgaagcagaagatagaagaaagaaaa…
	comp105399	0.00125622	-2.89183	2.89183	chitinase, partial	0.96	CAGTGTGGGAATGCCATAAA	ACCGAATCCAGGAACTCTAC	198	>comp105399_c0_seq1ggtggaggtggaggaggatcaggagtagcttccatcataagttcttcactgttcaatcaaatgctgctgcaccgcaacgatgcggcatgccctgccaatggattttacacctatgacgctttcatagcagcagcaaattcattcagcggcttcggtaccactggggataccgatacccaaaagagagagatcgctgctttctttgctcaaacttctcatgaaactaccggtggatatgcaagtgcacctgatgggccatattcatggggttactgcttcaagcaagaacaaggcaacccacccgattactgtcagccaagcacccagtacccctgcgcaccaggcaagaagtactacggaagaggacctattcaaatatc…
	comp103842	0.00158039	-2.78998	2.78998	HSP70 (Os11g0703900)	0.98	ATCTAGGAGGAGAGGACTTTG	CCCTTGTGATGGTTGAGTAG	219	>comp103842_c0_seq1tggcccttctcccccggactcacaataatcttattggttctcatcttcaaaccaaaaaatatctccagagaaaagtaaaatatgtccaaaggagaagggccagcgatcggaatagatctaggaaccacctactcatgtgtaggagtatggcagcacgatcgtgtcgagatcatcgccaacgatcaaggaaatcgcaccacaccttcctatgtggcgttcactgattctgaaaggctgattggtgatgctgctaagaatcaggttgccatgaacccagtcaacactgtttttgatgctaaacgtttgattggaagaagattcagtgatgcctcggttcaagcagacatgaagatgtggcctttcaaaatcatctctggtcc…
	comp98469	5.43223e-05	-7.57272	7.57272	heat shock protein 70 cognate	0.97	GGAGTGTTGATCCAGGTCTA	GTGATGGTGATCTTGCTCTC	203	>comp98469_c1_seq1aagaaatttcatccatggtcctcaccaagatgaaggaaacagctgaggcataccttggcaagactgtcacaaatgctgttgtcaccgtaccagcttatttcaatgattctcagcgtcaggccactaaggatgcgggtaccattgctgctctcaacgttttgcgtattatcaacgagcccactgctgctgccattgcgtatggtttggacaagaagggcagcaaggagagcaatgtcctcatctttgatttgggtggtggtacttttgatgtttccatcctgaccattgaagatggtatctttgaagtcaagtccactgctggagatacccatcttggtggtgaagatttcgacaaccgcatggtcaaccactttgtcctgg…
	comp96751	5.50854e-06	-5.07272	5.07272	PREDICTED: zinc finger protein ZAT10-like	0.56	CACTTGTCTTCTCCATCTCT	GCTAAGTACTCCTCTTCACT	220	>comp96751_c0_seq1ttctttctacagtactaataattgtacacgtaaattccatgtgtatcaaaaatgtgtgactaaaaaatcataacattcattcacttgtcttctccatctcttttttatatatgtaatccctacttttcttcttgctttcttgtactgcatgtgtcacgcaacttcctactcttaatttctatatatacacttcactctcatccagctttattcaacaaagcaacaaaaatatagaaatggcttcaaaaagacaacgttatgattcagacgatcactttgaaagtgaagaggagtacttagccttctgtctcgtgatgctatcgcgagacaacgatcgtaggtacaagtgtaaggtttgcgggaaagggttcggatcctacc…
	comp55556	0.000151881	-7.33309	7.33309	R2R3-MYB transcription factor MYB2	0.96	CCTAAACAAGCAGGTCTTCAG	CAGTGCAGTATTCGTAATCGAG	203	>comp55556_c0_seq1gtcacctgaagaagatgaaaagctttataatcacattacaaagtatggccatggttgttggagctctgtccctaaacaagcaggtcttcagaggtgtggaaagagttgcaggctgcgatggataaactacttaagacctgacctgaaacgaggcgcgttttcagaacaagaagaaaatcatataattgaactgcatgcaattttaggaaacaggtcaatgaagagctgaagtggcctgagtaccttaatggctcgattacgaatactgcactgattcaaaatcaaggtttaatgtatggtgatcttgttaaagaagaaagccagtttaacatcaatggattgaattgtaaggatgtaagcagaaattattatagcatttga…
	comp73820	8.33362e-05	-4.06481	4.06481	dehydration-responsive element-binding protein (DREB2), partial	0.6	GCCGTGGAGAATCAGTAGAA	CTCCACGGTATGTGCATGTA	168	>comp73820_c0_seq1catagagcttgttttatcaacatatatccgcgaagcaaagaaagatactatacgaatcataaccgaaacatggagatgaaaaagagcgcgaccatcagaaaagttaatggcgtgaaagaatcaacgagatctgataatgaaaatcctggaaaacaaagaaaacggcgccgtggagaatcagtagaagaaatccttagaaactggaaggaaaagaacaagataaacggcataaatgctacattaaatgatagaaaagtgcatgcaaaagggtcaataaaagggtgcatgcccggaaagggaggtccattaaattctacatgcacataccgtggagtcagacaaagaacatggggcaaatgggtggctgagatcagagaaccg…
Freezing (CT25°C vs CT-15°C)	comp73174	1.94063e-06	-8.3766	8.3766	PREDICTED: transcription factor bHLH18-like	0.65	CAGTACCGGCTGTTAAGAAA	CTTGCTCCTCAAGTGTCTTC	240	>comp73174_c0_seq1tttcaattgaagcttgccataccagttgaacgactgatccactgcaatctggtatatttttttatataaaaataagaggaaaacagaaataaaaaggttaacaagtttacaacgacaaaatcagagacgctaatatggacttatcagatcttgattcgctcttgaacaacttggagatggaaacgcagaactgcacaaatcgatgggatataagcagctttgatttcaacttaacggagaatagcacctgggatcagtacattcaaggaccatcgtcggagaattctagtttggaatcgcaagagattctgcaagatactaatatccttgagaaaaacaacaatgccgaagagcttcctcaagagaacagtggaatgaagt…
	comp72395	8.86216e-06	4.12187	-4.12187	chloroplast small heat shock protein 1	0.69	GACCCGTTTGCATACACTAC	CCATCTTCTCCGCCTTAATC	217	>comp72395_c0_seq1accagaaacacacatccgcgcttcataaaacccaccaccagaattctcaactttccgcatcgatccagattagaaatcacaaacgaaaacaggataaagcaaattaacaatgtcttcttccatttcaacattagctgcaacattgccatcagcttctccattctattcacgaagaagaaaacctatcaacaacgtcatcaactttagcctcaaggcaaatggaaatcacagaggaagcgaagtcagggacaatctcgatcatttacagagagctagtaagcagcagcaagccacacaaatccctaaaaagaggattgttcaatccgcccctttaggttcatgggacagattcccatcggcaagaacaatacagcaaatgat…
	comp89888	2.67803e-05	-4.03083	4.03083	C2H2-like zinc finger protein	0.7	CGAAATCGATGTCCACGAAC	TAGACCGATGAAGCTCCAAG	243	>comp89888_c0_seq1gtttcatatatattaaccaaaggtgataattattgtagatataataacatattgctcagacctcagagagagtgttgtggtattacttatgaagaacagctttgcagaataactacataaaaacagaacagacattcattcaccagttccttctcttcctctcttaaattcattcgcgtctccaatggcagacaaaagcaaatctcatgaaccggaaaactcaccttctagaagagcactaagaagcttcttttcttgcaaataccacaaagatcacacagatcagcaaaagcaaaagaaacacaaaaaagattcaactacaacaacaattactacaacaaacaaaaccactccttctccgcctgaagtgtcaaagagaag…
	comp105620	4.75455e-05	3.8494	-3.8494	AP2 domain class transcription factor	0.67	CTCCTCAACTCTGTCCTTCT	CGGGTTTGGTTAGGAACATT	207	>comp105620_c0_seq1ttcatcaataaagcataataaaaatagaacaaaatttcccacaacatgtcatctaaaactcatctcgcatatattttcatacagaaaggtctacgggataaataacaccttacgacaacaaaccctcgatttacataaccaacagtaagaaaggaaggggaaaaaaagggagagaataaaacaaatacgtaaatccattgtattcccctgtataaacaacaactagatattcatgctgattaagtccaaatcaaggatgatcctaatggagaaagcaatggcaaactgaaaatacccttcccatccaaaaacgccgtccaactagacggcgttaacggacgctccaactccgtctcctcctcaactctgtccttcttaac…
	comp99144	0.00017975	-3.59798	3.59798	PREDICTED: transcription factor bHLH35-like	0.89	ATGCTCTTCGTAGCCTAGTT	GGTGCTCATGTTTCTCCTTT	194	>comp99144_c1_seq1aattcgagtatgccaactactgggaaactaatcaattttatcaagagctcgataggtacatgtatatacttatatttgcttcacccaatttattaattacttcttgagagctgcatgcaaatgttgttattaattaattttaataaacatttagctggggaatcgatgatgcgttcttaaactatgagtcgagcagctcgcgtgaaggaacaacaaacaactctccttctatttccaatgttaatgcaggaaagaacataataatggaaagaaacaggagaagaaagctcaatgataagctatatgctcttcgtagcctagttccaaatattaccaagatggacaaggcatcgataatcaaggatgcaatcgaatacattc…
	comp89424	0.000267738	3.91751	-3.91751	PREDICTED: RING finger and CHY zinc finger domain-containing protein 1-like	0.85	TGCACCTCCTCCTATAATGT	CAACGCTCTCTCCTCCAATA	224	>comp89424_c0_seq1agtagtttcccatacaaacaccacagtttgagcaattttgatgaacatcttgttctgtgtcacataaagagcatatgacctgaaggaaaaaaacatagaaagttacggaacagaaaatgtcatcaaaataattaaagataaatgcagacattatcttataaaaatgtaaagagaataaataaaccagaaccttattaacatcatggcgaggaatcatatgcctttcaataggatccacatccaaagagttttttgcttcgttatggcaatgcctgcaattaaaaacttcattacagcaaggtgctcttattttgcacctcctcctataatgttcacatccatattgctcggagctaaaatcagctgataaaacttccatgt…
	comp109061	0.000342579	3.64214	-3.64214	PREDICTED: probable calcium-binding protein CML45-like	0.77	GAGGAAGTAGAAGTGCTTATGG	AAATCAATCTTCCCGTCACC	215	>comp109061_c0_seq1taagaatcatggaaggcacatctcttgccttgtacattaccagattcataatattttccattaaaaatgttttaaaagaaattttccatttctattccatgtttgcttgtttcatgtcgtatagatcccaatacatgatcagttgcaatgattctttcatttcggataatctggaagagaagacagcagcaagcataagttatgaagatgtgaataaggtaatagagagactgggaatacatgtggggtcatgtacagagaagagatggagagaggaagtagaagtgcttatggaagagaaggaggcgagctacgaggaactgaaggaggcattttatgtatttgataggaatgaagatggatttgttactgcggcagag…
	comp85308	0.000425312	-3.20444	3.20444	hypothetical protein VITISV_006470	0.92	CACCACACGACCAAATATCA	CCATGCGAGAGGTGTTTATC	224	>comp85308_c0_seq1tcaatatcaaagaacaattttatttctgaattttttctccttttttcagttacaaaatcaacactgtatttatacacaacagagaattatcataatacacaagcccaaacacaactgcagcccaatacaacacaaaagacccagatcaaaaactgatactactacattaacccaatatcacaatctcttaagcatatcagctgtgcacaaaaacatctgccactgtttcattgttccattccactgcagaagcttcatctttcttcttgcaaaccattgctaacattcccttgctgttacacgaaccctttcttgaaccatttgttctccatgatttctggaatggtgatccgtgtttttggattggtatcaagaagcctc…
	comp96377	0.000438522	3.52731	-3.52731	Basic-leucine zipper transcription factor family protein, putative	0.78	TCAGCTTGGTTCACACAATG	GGATAGCGTTGATGCTGTTAG	260	>comp96377_c1_seq5gaataaagttccccagctttactgtccatattaccaagttaagacattgatatttcataaggtcagaaaatgtaaatagcgtcaatgtgcatattgtaatttatcggaaacattaatctcttaacaacagcaagatgaacatcacagcaatgtatgcatttaacttgtgtgatgcaacctcatgaatatagaaatacaatcagcttggttcacacaatggcatgttatttctacaattgacttttagatcattcagacacacttatgtatgcaataacaaggcaaatctttttggcaagcaagttaaacgatgtgcagaagtatcaattgttgtgatcacgattaatttcatgacattctgaatggaaaatccaagttgtt…
	comp103446	0.000473374	3.19267	-3.19267	hypothetical protein ZEAMMB73_275076, partial	0.6	GAGGGTATGGAAGTTCAAGTG	CGACGAGAAGTTTATGCTAGAG	234	>comp103446_c2_seq1tgacactatccacaataactataaatactccacagaactcagtgagtagactcaaaccatgtcgatgttaagtagtaagagtgtgtgtacagtgctggtagcattggtagggataataaccatatgttcagcagctagagtactttacagcatagaagacgttattggaagcaataaggtcgccataggcactgaatcaacagggggtggaggctgtggaagaggtggcggtacaggagatgggggtgggtatgaaggacagcatggaggtggaggaggtggtggtggaagtagcagcggaggaagtaatgatggtgggtatggagcagagtgtgggactggtgtgggtgggggtagttatggagcaggtggagggtatg…
	comp71648	0.000476766	3.2169	-3.2169	CII small heat shock protein 1	0.8	GGAACGTGATGAAGCAAATG	CAAGCAACATGAACCTGAAC	225	>comp71648_c0_seq1gttccctttaaaatccacaggtcaccctcattcatctccaatcaacagaaatcgaagcaaattcagtttaacagaaaaagtcgaagccttcaaaaatggacgcccatcttgtgatgctgggagacccgctaatggcgactttgcaccacctgctggaccactccgacgaacaaaacaaaaacgttagcgcaccaacccgtaaatacgttcgagacgcacgtgctatggcggctacgccggcggacgtgatggaactttcaaagtcgtatgtgtttgtgatagacatgccgggagtgaaatcaggcgatctcagcgttcaagtggaggatgagaatgttctggtcatcagtggagagaggaagagggaacgtgatgaagcaa…
* (-) values are down regulation
