# Supplementary material for: De Novo Assembly and Transcriptome Analysis of Bulb Onion (Allium cepa L.) during Cold Acclimation Using Contrasting Genotypes
Source: PLoS One. 2016 Sep 14;11(9):e0161987. doi: 10.1371/journal.pone.0161987 (PMC5023330; doi:10.1371/journal.pone.0161987)
Supplement: S2 Table — (XLSX) [file pone.0161987.s008.xlsx]

## Sheet: Sheet1
Supplementary Table S2. Classification of pathways were mapped under KEGG database using assembled genes of transcriptome
Pathway maps	Major clades	Pathway_definition	number_of_seqs
1. Metabolism	Global and overview maps	Metabolic pathways	2834
	Global and overview maps	Biosynthesis of secondary metabolites	1346
	Global and overview maps	Microbial metabolism in diverse environments	555
	Global and overview maps	Biosynthesis of amino acids	398
	Global and overview maps	Carbon metabolism	393
	Carbohydrate metabolism	Starch and sucrose metabolism	281
	Energy metabolism	Oxidative phosphorylation	260
	Nucleotide metabolism	Purine metabolism	255
	Nucleotide metabolism	Pyrimidine metabolism	211
	Carbohydrate metabolism	Amino sugar and nucleotide sugar metabolism	202
	Carbohydrate metabolism	Glycolysis / Gluconeogenesis	201
	Lipid metabolism	Glycerophospholipid metabolism	177
	Global and overview maps	Fatty acid metabolism	145
	Amino acid metabolism	Cysteine and methionine metabolism	138
	Biosynthesis of other secondary metabolites	Phenylpropanoid biosynthesis	132
	Metabolism of other amino acids	Glutathione metabolism	131
	Carbohydrate metabolism	Pyruvate metabolism	120
	Carbohydrate metabolism	Galactose metabolism	118
	Lipid metabolism	Glycerolipid metabolism	118
	Amino acid metabolism	Valine, leucine and isoleucine degradation	112
	Carbohydrate metabolism	Fructose and mannose metabolism	109
	Amino acid metabolism	Arginine and proline metabolism	107
	Amino acid metabolism	Glycine, serine and threonine metabolism	105
	Energy metabolism	Carbon fixation in photosynthetic organisms	104
	Energy metabolism	Methane metabolism	104
	Carbohydrate metabolism	Pentose phosphate pathway	99
	Lipid metabolism	Fatty acid degradation	93
	Energy metabolism	Photosynthesis	92
	Global and overview maps	2-Oxocarboxylic acid metabolism	90
	Carbohydrate metabolism	Pentose and glucuronate interconversions	90
	Carbohydrate metabolism	Inositol phosphate metabolism	84
	Glycan biosynthesis and metabolism	N-Glycan biosynthesis	84
	Carbohydrate metabolism	Citrate cycle (TCA cycle)	82
	Carbohydrate metabolism	Glyoxylate and dicarboxylate metabolism	82
	Metabolism of terpenoids and polyketides	Terpenoid backbone biosynthesis	81
	Amino acid metabolism	Phenylalanine metabolism	80
	Metabolism of cofactors and vitamins	Porphyrin and chlorophyll metabolism	70
	Metabolism of other amino acids	Cyanoamino acid metabolism	66
	Metabolism of cofactors and vitamins	Pantothenate and CoA biosynthesis	65
	Carbohydrate metabolism	Propanoate metabolism	65
	Amino acid metabolism	Alanine, aspartate and glutamate metabolism	64
	Glycan biosynthesis and metabolism	Various types of N-glycan biosynthesis	64
	Carbohydrate metabolism	Ascorbate and aldarate metabolism	62
	Metabolism of other amino acids	beta-Alanine metabolism	62
	Lipid metabolism	Fatty acid biosynthesis	62
	Lipid metabolism	Biosynthesis of unsaturated fatty acids	61
	Metabolism of terpenoids and polyketides	Carotenoid biosynthesis	60
	Lipid metabolism	Ether lipid metabolism	60
	Energy metabolism	Carbon fixation pathways in prokaryotes	59
	Amino acid metabolism	Phenylalanine, tyrosine and tryptophan biosynthesis	59
	Lipid metabolism	alpha-Linolenic acid metabolism	58
	Xenobiotics biodegradation and metabolism	Drug metabolism - cytochrome P450	58
	Xenobiotics biodegradation and metabolism	Metabolism of xenobiotics by cytochrome P450	58
	Glycan biosynthesis and metabolism	Glycosylphosphatidylinositol(GPI)-anchor biosynthesis	54
	Metabolism of cofactors and vitamins	Ubiquinone and other terpenoid-quinone biosynthesis	53
	Metabolism of other amino acids	Selenocompound metabolism	51
	Energy metabolism	Sulfur metabolism	50
	Amino acid metabolism	Tyrosine metabolism	49
	Lipid metabolism	Sphingolipid metabolism	48
	Lipid metabolism	Steroid biosynthesis	45
	Lipid metabolism	Fatty acid elongation	44
	Amino acid metabolism	Valine, leucine and isoleucine biosynthesis	43
	Lipid metabolism	Linoleic acid metabolism	39
	Glycan biosynthesis and metabolism	Glycosaminoglycan degradation	38
	Amino acid metabolism	Histidine metabolism	38
	Amino acid metabolism	Tryptophan metabolism	38
	Xenobiotics biodegradation and metabolism	Chloroalkane and chloroalkene degradation	37
	Biosynthesis of other secondary metabolites	Flavonoid biosynthesis	37
	Metabolism of cofactors and vitamins	Folate biosynthesis	36
	Energy metabolism	Nitrogen metabolism	36
	Metabolism of cofactors and vitamins	Biotin metabolism	35
	Xenobiotics biodegradation and metabolism	Drug metabolism - other enzymes	35
	Glycan biosynthesis and metabolism	Other glycan degradation	35
	Metabolism of cofactors and vitamins	One carbon pool by folate	33
	Biosynthesis of other secondary metabolites	Streptomycin biosynthesis	33
	Metabolism of terpenoids and polyketides	Brassinosteroid biosynthesis	32
	Glycan biosynthesis and metabolism	Glycosphingolipid biosynthesis - globo series	32
	Amino acid metabolism	Lysine degradation	32
	Lipid metabolism	Cutin, suberine and wax biosynthesis	31
	Metabolism of terpenoids and polyketides	Limonene and pinene degradation	31
	Metabolism of cofactors and vitamins	Nicotinate and nicotinamide metabolism	28
	Metabolism of cofactors and vitamins	Thiamine metabolism	27
	Lipid metabolism	Arachidonic acid metabolism	26
	Global and overview maps	Degradation of aromatic compounds	26
	Amino acid metabolism	Lysine biosynthesis	26
	Biosynthesis of other secondary metabolites	Tropane, piperidine and pyridine alkaloid biosynthesis	26
	Glycan biosynthesis and metabolism	Lipopolysaccharide biosynthesis	25
	Biosynthesis of other secondary metabolites	Stilbenoid, diarylheptanoid and gingerol biosynthesis	25
	Biosynthesis of other secondary metabolites	Butirosin and neomycin biosynthesis	23
	Metabolism of cofactors and vitamins	Retinol metabolism	23
	Energy metabolism	Photosynthesis - antenna proteins	22
	Metabolism of other amino acids	Taurine and hypotaurine metabolism	22
	Glycan biosynthesis and metabolism	Glycosphingolipid biosynthesis - ganglio series	21
	Xenobiotics biodegradation and metabolism	Aminobenzoate degradation	20
	Carbohydrate metabolism	Butanoate metabolism	20
	Metabolism of terpenoids and polyketides	Zeatin biosynthesis	20
	Xenobiotics biodegradation and metabolism	Naphthalene degradation	19
	Biosynthesis of other secondary metabolites	Isoquinoline alkaloid biosynthesis	17
	Metabolism of other amino acids	Phosphonate and phosphinate metabolism	16
	Xenobiotics biodegradation and metabolism	Benzoate degradation	15
	Metabolism of cofactors and vitamins	Riboflavin metabolism	15
	Metabolism of cofactors and vitamins	Vitamin B6 metabolism	15
	Metabolism of terpenoids and polyketides	Diterpenoid biosynthesis	14
	Xenobiotics biodegradation and metabolism	Polycyclic aromatic hydrocarbon degradation	14
	Metabolism of terpenoids and polyketides	Tetracycline biosynthesis	12
	Xenobiotics biodegradation and metabolism	Bisphenol degradation	10
	Carbohydrate metabolism	C5-Branched dibasic acid metabolism	9
	Lipid metabolism	Synthesis and degradation of ketone bodies	9
	Metabolism of terpenoids and polyketides	Geraniol degradation	8
	Glycan biosynthesis and metabolism	Other types of O-glycan biosynthesis	8
	Xenobiotics biodegradation and metabolism	Caprolactam degradation	7
	Biosynthesis of other secondary metabolites	Flavone and flavonol biosynthesis	7
	Metabolism of cofactors and vitamins	Lipoic acid metabolism	7
	Biosynthesis of other secondary metabolites	Anthocyanin biosynthesis	6
	Metabolism of terpenoids and polyketides	Sesquiterpenoid and triterpenoid biosynthesis	6
	Lipid metabolism	Steroid hormone biosynthesis	6
	Xenobiotics biodegradation and metabolism	Styrene degradation	6
	Metabolism of terpenoids and polyketides	Biosynthesis of ansamycins	5
	Biosynthesis of other secondary metabolites	Caffeine metabolism	5
	Metabolism of other amino acids	D-Glutamine and D-glutamate metabolism	5
	Biosynthesis of other secondary metabolites	Indole alkaloid biosynthesis	5
	Xenobiotics biodegradation and metabolism	Chlorocyclohexane and chlorobenzene degradation	4
	Xenobiotics biodegradation and metabolism	Fluorobenzoate degradation	4
	Biosynthesis of other secondary metabolites	Novobiocin biosynthesis	4
	Xenobiotics biodegradation and metabolism	Toluene degradation	4
	Metabolism of terpenoids and polyketides	Monoterpenoid biosynthesis	3
	Glycan biosynthesis and metabolism	Peptidoglycan biosynthesis	2
	Xenobiotics biodegradation and metabolism	Steroid degradation	2
	Biosynthesis of other secondary metabolites	Aflatoxin biosynthesis	1
	Biosynthesis of other secondary metabolites	Betalain biosynthesis	1
	Metabolism of terpenoids and polyketides	Polyketide sugar unit biosynthesis	1
2. Genetic Information Processing	Translation	Ribosome	388
	Transcription	Spliceosome	306
	Folding, sorting and degradation	Protein processing in endoplasmic reticulum	302
	Translation	RNA transport	273
	Folding, sorting and degradation	Ubiquitin mediated proteolysis	238
	Translation	mRNA surveillance pathway	218
	Translation	Ribosome biogenesis in eukaryotes	211
	Folding, sorting and degradation	RNA degradation	174
	Replication and repair	Nucleotide excision repair	125
	Replication and repair	Fanconi anemia pathway	114
	Replication and repair	DNA replication	110
	Replication and repair	Homologous recombination	110
	Folding, sorting and degradation	Proteasome	97
	Translation	Aminoacyl-tRNA biosynthesis	96
	Replication and repair	Base excision repair	90
	Replication and repair	Mismatch repair	88
	Folding, sorting and degradation	Protein export	87
	Transcription	RNA polymerase	74
	Transcription	Basal transcription factors	69
	Folding, sorting and degradation	SNARE interactions in vesicular transport	66
	Replication and repair	Non-homologous end-joining	26
	Folding, sorting and degradation	Sulfur relay system	20
3. Environmental Information Processing	Signal transduction	Plant hormone signal transduction	258
	Signal transduction	PI3K-Akt signaling pathway	143
	Signal transduction	Wnt signaling pathway	97
	Signal transduction	FoxO signaling pathway	95
	Signal transduction	Phosphatidylinositol signaling system	92
	Signal transduction	HIF-1 signaling pathway	84
	Signal transduction	Ras signaling pathway	82
	Signal transduction	MAPK signaling pathway	71
	Signal transduction	Calcium signaling pathway	55
	Signal transduction	Hippo signaling pathway	55
	Signal transduction	Rap1 signaling pathway	48
	Signal transduction	Hippo signaling pathway - fly	45
	Signal transduction	TGF-beta signaling pathway	44
	Signal transduction	VEGF signaling pathway	42
	Signal transduction	mTOR signaling pathway	41
	Membrane transport	ABC transporters	37
	Signal transduction	NF-kappa B signaling pathway	30
	Signal transduction	Two-component system	28
	Membrane transport	Bacterial secretion system	23
	Signal transduction	ErbB signaling pathway	21
	Signal transduction	Hedgehog signaling pathway	20
	Signal transduction	Notch signaling pathway	17
	Signal transduction	TNF signaling pathway	16
	Signal transduction	MAPK signaling pathway - fly	15
	Signaling molecules and interaction	Cell adhesion molecules (CAMs)	13
	Signal transduction	MAPK signaling pathway - yeast	7
	Signaling molecules and interaction	Neuroactive ligand-receptor interaction	5
	Signal transduction	Jak-STAT signaling pathway	3
4. Cellular Processes	Cell growth and death	Cell cycle	210
	Transport and catabolism	Lysosome	196
	Cell growth and death	Oocyte meiosis	187
	Transport and catabolism	Endocytosis	179
	Cell growth and death	Cell cycle - yeast	165
	Transport and catabolism	Phagosome	159
	Cell growth and death	Meiosis - yeast	128
	Transport and catabolism	Peroxisome	128
	Cell motility	Regulation of actin cytoskeleton	108
	Cell growth and death	p53 signaling pathway	87
	Cellular community	Tight junction	53
	Cellular community	Focal adhesion	49
	Cellular community	Adherens junction	47
	Cellular community	Gap junction	46
	Transport and catabolism	Regulation of autophagy	31
	Cell growth and death	Apoptosis	27
	Cell growth and death	Cell cycle - Caulobacter	24
5. Organismal Systems	Environmental adaptation	Plant-pathogen interaction	237
	Endocrine system	Insulin signaling pathway	123
	Immune system	Antigen processing and presentation	106
	Endocrine system	Progesterone-mediated oocyte maturation	103
	Immune system	Fc gamma R-mediated phagocytosis	99
	Nervous system	Synaptic vesicle cycle	95
	Endocrine system	Oxytocin signaling pathway	86
	Circulatory system	Adrenergic signaling in cardiomyocytes	81
	Endocrine system	Estrogen signaling pathway	81
	Nervous system	Dopaminergic synapse	80
	Endocrine system	Thyroid hormone signaling pathway	76
	Nervous system	Glutamatergic synapse	71
	Nervous system	Neurotrophin signaling pathway	68
	Environmental adaptation	Circadian rhythm - plant	67
	Nervous system	GABAergic synapse	63
	Nervous system	Long-term potentiation	62
	Endocrine system	GnRH signaling pathway	60
	Endocrine system	PPAR signaling pathway	56
	Immune system	Natural killer cell mediated cytotoxicity	47
	Circulatory system	Vascular smooth muscle contraction	46
	Immune system	Cytosolic DNA-sensing pathway	43
	Development	Osteoclast differentiation	43
	Nervous system	Retrograde endocannabinoid signaling	43
	Development	Axon guidance	42
	Digestive system	Bile secretion	42
	Immune system	B cell receptor signaling pathway	41
	Endocrine system	Adipocytokine signaling pathway	40
	Endocrine system	Thyroid hormone synthesis	40
	Immune system	T cell receptor signaling pathway	38
	Endocrine system	Melanogenesis	36
	Immune system	Chemokine signaling pathway	34
	Endocrine system	Renin-angiotensin system	34
	Excretory system	Collecting duct acid secretion	32
	Environmental adaptation	Circadian entrainment	31
	Environmental adaptation	Circadian rhythm	30
	Immune system	Fc epsilon RI signaling pathway	30
	Circulatory system	Cardiac muscle contraction	29
	Sensory system	Inflammatory mediator regulation of TRP channels	28
	Nervous system	Long-term depression	27
	Immune system	NOD-like receptor signaling pathway	27
	Nervous system	Serotonergic synapse	26
	Immune system	Toll-like receptor signaling pathway	25
	Digestive system	Carbohydrate digestion and absorption	24
	Nervous system	Cholinergic synapse	24
	Development	Dorso-ventral axis formation	21
	Sensory system	Phototransduction	20
	Digestive system	Salivary secretion	19
	Excretory system	Endocrine and other factor-regulated calcium reabsorption	18
	Digestive system	Gastric acid secretion	17
	Digestive system	Pancreatic secretion	17
	Sensory system	Phototransduction - fly	17
	Endocrine system	Prolactin signaling pathway	17
	Sensory system	Olfactory transduction	16
	Immune system	RIG-I-like receptor signaling pathway	16
	Immune system	Leukocyte transendothelial migration	15
	Digestive system	Mineral absorption	14
	Excretory system	Aldosterone-regulated sodium reabsorption	13
	Digestive system	Protein digestion and absorption	13
	Excretory system	Vasopressin-regulated water reabsorption	13
	Sensory system	Taste transduction	9
	Digestive system	Fat digestion and absorption	8
	Excretory system	Proximal tubule bicarbonate reclamation	7
	Immune system	Intestinal immune network for IgA production	6
	Environmental adaptation	Circadian rhythm - fly	5
	Endocrine system	Insulin secretion	4
	Endocrine system	Ovarian steroidogenesis	3
	Digestive system	Vitamin digestion and absorption	1
6. Human Diseases	Infectious diseases: Viral	Epstein-Barr virus infection	258
	Cancers: Overview	Viral carcinogenesis	206
	Neurodegenerative diseases	Huntington's disease	179
	Infectious diseases: Viral	Herpes simplex infection	167
	Infectious diseases: Viral	HTLV-I infection	163
	Neurodegenerative diseases	Alzheimer's disease	156
	Neurodegenerative diseases	Parkinson's disease	150
	Substance dependence	Alcoholism	123
	Cancers: Overview	Pathways in cancer	117
	Cancers: Overview	MicroRNAs in cancer	103
	Infectious diseases: Bacterial	Tuberculosis	100
	Infectious diseases: Viral	Influenza A	99
	Endocrine and metabolic diseases	Non-alcoholic fatty liver disease (NAFLD)	97
	Infectious diseases: Parasitic	Toxoplasmosis	97
	Cancers: Overview	Proteoglycans in cancer	96
	Infectious diseases: Viral	Measles	89
	Immune diseases	Systemic lupus erythematosus	78
	Cancers: Overview	Transcriptional misregulation in cancer	77
	Infectious diseases: Bacterial	Legionellosis	68
	Immune diseases	Rheumatoid arthritis	68
	Infectious diseases: Bacterial	Vibrio cholerae infection	68
	Infectious diseases: Viral	Hepatitis B	64
	Cancers: Specific types	Prostate cancer	57
	Infectious diseases: Bacterial	Pathogenic Escherichia coli infection	55
	Endocrine and metabolic diseases	Type II diabetes mellitus	52
	Infectious diseases: Bacterial	Shigellosis	50
	Cancers: Specific types	Colorectal cancer	49
	Infectious diseases: Bacterial	Epithelial cell signaling in Helicobacter pylori infection	48
	Substance dependence	Amphetamine addiction	45
	Cancers: Overview	Chemical carcinogenesis	43
	Neurodegenerative diseases	Amyotrophic lateral sclerosis (ALS)	42
	Infectious diseases: Bacterial	Salmonella infection	41
	Cancers: Specific types	Glioma	37
	Infectious diseases: Bacterial	Bacterial invasion of epithelial cells	36
	Infectious diseases: Viral	Hepatitis C	36
	Substance dependence	Morphine addiction	36
	Cancers: Specific types	Renal cell carcinoma	35
	Cardiovascular diseases	Viral myocarditis	35
	Neurodegenerative diseases	Prion diseases	34
	Infectious diseases: Parasitic	Chagas disease (American trypanosomiasis)	33
	Infectious diseases: Bacterial	Pertussis	32
	Cancers: Specific types	Pancreatic cancer	30
	Cancers: Specific types	Endometrial cancer	29
	Substance dependence	Nicotine addiction	27
	Cancers: Specific types	Chronic myeloid leukemia	21
	Cancers: Specific types	Non-small cell lung cancer	21
	Cancers: Specific types	Small cell lung cancer	21
	Cancers: Specific types	Acute myeloid leukemia	20
	Infectious diseases: Parasitic	Amoebiasis	19
	Endocrine and metabolic diseases	Type I diabetes mellitus	19
	Cancers: Specific types	Melanoma	18
	Infectious diseases: Parasitic	Leishmaniasis	17
	Cancers: Specific types	Thyroid cancer	17
	Cancers: Specific types	Bladder cancer	15
	Immune diseases	Allograft rejection	12
	Immune diseases	Autoimmune thyroid disease	12
	Immune diseases	Graft-versus-host disease	12
	Infectious diseases: Bacterial	Staphylococcus aureus infection	8
	Infectious diseases: Parasitic	African trypanosomiasis	7
	Immune diseases	Asthma	7
	Cardiovascular diseases	Hypertrophic cardiomyopathy (HCM)	7
	Immune diseases	Primary immunodeficiency	7
	Cardiovascular diseases	Dilated cardiomyopathy	6
	Immune diseases	Inflammatory bowel disease (IBD)	6
	Cancers: Specific types	Basal cell carcinoma	5
	Substance dependence	Cocaine addiction	4
	Cardiovascular diseases	Arrhythmogenic right ventricular cardiomyopathy (ARVC)	3
	Infectious diseases: Bacterial	Vibrio cholerae pathogenic cycle	1
