# Supplementary material for: De Novo Assembly and Transcriptome Analysis of Bulb Onion (Allium cepa L.) during Cold Acclimation Using Contrasting Genotypes
Source: PLoS One. 2016 Sep 14;11(9):e0161987. doi: 10.1371/journal.pone.0161987 (PMC5023330; doi:10.1371/journal.pone.0161987)
Supplement: S3 Table — (XLSX) [file pone.0161987.s009.xlsx]

## Sheet: CS(2)
Supplementary Table S3. The ID's and FPKM of each gene exhibiting difference among all the libraries
Gene_id	Transcript_id(s)	Length	Effective_length	Expected_count	TPM	FPKM
comp100_c0	comp100_c0_seq1	827	773.54	4	0.33	0.22
comp100000_c0	comp100000_c0_seq1,comp100000_c0_seq2,comp100000_c0_seq3,comp100000_c0_seq4,comp100000_c0_seq5	2129.59	2076.14	2373.03	71.74	48.22
comp100001_c0	comp100001_c0_seq1	2069	2015.54	33	1.03	0.69
comp100002_c0	comp100002_c0_seq2,comp100002_c0_seq3,comp100002_c0_seq4,comp100002_c0_seq5	1087.44	1033.98	1244.09	75.73	50.9
comp100003_c0	comp100003_c0_seq1,comp100003_c0_seq2,comp100003_c0_seq3,comp100003_c0_seq4,comp100003_c0_seq5	2900.3	2846.84	286.23	6.31	4.24
comp100004_c1	comp100004_c1_seq1,comp100004_c1_seq2	533	479.58	2	0.26	0.18
comp100005_c0	comp100005_c0_seq1,comp100005_c0_seq2,comp100005_c0_seq3	1639.62	1586.16	80	3.17	2.13
comp100006_c0	comp100006_c0_seq1	534	480.58	0	0	0
comp100006_c1	comp100006_c1_seq1,comp100006_c1_seq2,comp100006_c1_seq3,comp100006_c1_seq4,comp100006_c1_seq5	1190.01	1136.55	113	6.25	4.2
comp100006_c2	comp100006_c2_seq1,comp100006_c2_seq4	2144.72	2091.26	606.41	18.2	12.23
comp100007_c0	comp100007_c0_seq1	1451	1397.54	30.25	1.36	0.91
comp100008_c1	comp100008_c1_seq1,comp100008_c1_seq3,comp100008_c1_seq4	1237.48	1184.02	33	1.75	1.18
comp100009_c0	comp100009_c0_seq1,comp100009_c0_seq2	1348.94	1295.48	3059	148.45	99.78
comp100010_c1	comp100010_c1_seq1,comp100010_c1_seq2,comp100010_c1_seq3,comp100010_c1_seq4,comp100010_c1_seq5	3403.99	3350.53	1707.71	31.96	21.48
comp100010_c3	comp100010_c3_seq1	1043	989.54	37	2.35	1.58
comp100010_c4	comp100010_c4_seq1	1717	1663.54	943	35.6	23.93
comp100011_c0	comp100011_c0_seq1,comp100011_c0_seq2,comp100011_c0_seq3,comp100011_c0_seq4,comp100011_c0_seq5	1359.94	1306.48	13.27	0.64	0.43
comp100011_c1	comp100011_c1_seq1,comp100011_c1_seq2,comp100011_c1_seq3,comp100011_c1_seq4	709.72	656.27	28	2.69	1.81
comp100011_c2	comp100011_c2_seq1,comp100011_c2_seq2	570	516.57	2	0.24	0.16
comp100012_c0	comp100012_c0_seq1,comp100012_c0_seq2,comp100012_c0_seq3,comp100012_c0_seq4,comp100012_c0_seq5	4588.95	4535.49	3003.01	41.49	27.89
comp100012_c2	comp100012_c2_seq1	639	585.56	23	2.48	1.67
comp100012_c4	comp100012_c4_seq1,comp100012_c4_seq2,comp100012_c4_seq3,comp100012_c4_seq4,comp100012_c4_seq5	2025.19	1971.74	3081.07	98.09	65.93
comp100013_c0	comp100013_c0_seq1,comp100013_c0_seq2	552.3	498.87	24	3.04	2.05
comp100013_c1	comp100013_c1_seq2,comp100013_c1_seq3,comp100013_c1_seq4,comp100013_c1_seq5	859	805.54	15	1.17	0.79
comp100013_c3	comp100013_c3_seq2	792	738.54	21	1.79	1.21
comp100014_c0	comp100014_c0_seq1,comp100014_c0_seq2,comp100014_c0_seq3,comp100014_c0_seq4	1211.92	1158.46	193.5	10.51	7.06
comp100015_c0	comp100015_c0_seq1,comp100015_c0_seq2	2039	1985.54	30	0.95	0.64
comp100015_c1	comp100015_c1_seq1,comp100015_c1_seq2,comp100015_c1_seq4	1096	1042.54	1	0.06	0.04
comp100015_c2	comp100015_c2_seq1,comp100015_c2_seq2,comp100015_c2_seq3,comp100015_c2_seq5	1223.03	1169.57	35	1.88	1.27
comp100016_c0	comp100016_c0_seq1,comp100016_c0_seq3,comp100016_c0_seq4,comp100016_c0_seq5	879.72	826.26	110	8.39	5.64
comp100016_c2	comp100016_c2_seq1	571	517.57	21	2.57	1.73
comp100016_c3	comp100016_c3_seq1,comp100016_c3_seq2	1261	1207.54	33	1.72	1.16
comp100017_c0	comp100017_c0_seq2,comp100017_c0_seq5	1911.17	1857.72	168	5.68	3.82
comp100017_c1	comp100017_c1_seq2	556	502.57	7	0.88	0.59
comp100017_c3	comp100017_c3_seq1,comp100017_c3_seq2,comp100017_c3_seq3	572.24	518.81	9	1.1	0.74
comp100018_c0	comp100018_c0_seq1,comp100018_c0_seq2,comp100018_c0_seq3	1234.41	1180.95	18	0.96	0.64
comp100019_c1	comp100019_c1_seq1,comp100019_c1_seq2,comp100019_c1_seq3,comp100019_c1_seq4	1042.71	989.25	37	2.35	1.58
comp100019_c2	comp100019_c2_seq1,comp100019_c2_seq2,comp100019_c2_seq3,comp100019_c2_seq4,comp100019_c2_seq5	1868.73	1815.27	1246.38	43.11	28.98
comp100020_c0	comp100020_c0_seq3,comp100020_c0_seq4	1158.57	1105.11	131	7.46	5.01
comp100021_c0	comp100021_c0_seq1,comp100021_c0_seq2,comp100021_c0_seq3,comp100021_c0_seq4,comp100021_c0_seq5	1646.68	1593.22	214.06	8.44	5.67
comp100022_c0	comp100022_c0_seq1,comp100022_c0_seq2,comp100022_c0_seq3,comp100022_c0_seq4,comp100022_c0_seq5	1343.73	1290.27	25	1.22	0.82
comp100023_c0	comp100023_c0_seq1,comp100023_c0_seq2,comp100023_c0_seq3,comp100023_c0_seq4,comp100023_c0_seq5	4430.1	4376.64	542	7.76	5.22
comp100023_c4	comp100023_c4_seq1,comp100023_c4_seq2,comp100023_c4_seq3,comp100023_c4_seq4,comp100023_c4_seq5	853.97	800.52	32	2.52	1.69
comp100024_c0	comp100024_c0_seq1,comp100024_c0_seq2,comp100024_c0_seq3,comp100024_c0_seq5	1766.94	1713.49	97	3.56	2.39
comp100024_c2	comp100024_c2_seq1	555	501.57	6	0.76	0.51
comp100025_c0	comp100025_c0_seq1	539	485.58	0	0	0
comp100026_c1	comp100026_c1_seq1	768	714.54	23	2.03	1.36
comp100026_c4	comp100026_c4_seq3	573	519.57	13	1.58	1.06
comp100026_c5	comp100026_c5_seq1,comp100026_c5_seq2,comp100026_c5_seq3,comp100026_c5_seq4	736.97	683.53	37	3.42	2.3
comp100026_c6	comp100026_c6_seq1	628	574.56	13	1.43	0.96
comp100026_c7	comp100026_c7_seq1,comp100026_c7_seq3	1345.62	1292.16	75	3.65	2.45
comp100026_c8	comp100026_c8_seq1,comp100026_c8_seq2	718	664.55	0	0	0
comp100027_c0	comp100027_c0_seq1,comp100027_c0_seq2	1192.33	1138.87	36.89	2.04	1.37
comp100028_c0	comp100028_c0_seq2,comp100028_c0_seq3,comp100028_c0_seq4,comp100028_c0_seq5	1038.69	985.23	13	0.83	0.56
comp100028_c2	comp100028_c2_seq1,comp100028_c2_seq2	650	596.55	23	2.44	1.64
comp100028_c3	comp100028_c3_seq1,comp100028_c3_seq3	554.83	501.4	13	1.64	1.1
comp100029_c0	comp100029_c0_seq1,comp100029_c0_seq2,comp100029_c0_seq3	3283.58	3230.12	160	3.11	2.09
comp100030_c0	comp100030_c0_seq1,comp100030_c0_seq2	2791	2737.54	1	0.02	0.02
comp100031_c0	comp100031_c0_seq1,comp100031_c0_seq2	2350.08	2296.62	1270.69	34.72	23.33
comp100032_c0	comp100032_c0_seq1,comp100032_c0_seq2,comp100032_c0_seq3,comp100032_c0_seq4	2065.92	2012.47	77	2.4	1.61
comp100033_c0	comp100033_c0_seq1	1410	1356.54	15	0.7	0.47
comp100033_c2	comp100033_c2_seq1	541	487.58	12	1.56	1.05
comp100033_c3	comp100033_c3_seq2,comp100033_c3_seq3,comp100033_c3_seq4,comp100033_c3_seq5	999.4	945.95	21	1.4	0.94
comp100033_c5	comp100033_c5_seq1	641	587.55	11	1.18	0.8
comp100034_c0	comp100034_c0_seq1,comp100034_c0_seq2	1199.97	1146.51	432.66	23.74	15.96
comp100035_c0	comp100035_c0_seq1,comp100035_c0_seq2	570.24	516.81	34	4.16	2.8
comp100035_c1	comp100035_c1_seq2,comp100035_c1_seq4,comp100035_c1_seq5	1149.81	1096.35	2155.98	123.73	83.16
comp100036_c0	comp100036_c0_seq1,comp100036_c0_seq2,comp100036_c0_seq3,comp100036_c0_seq4,comp100036_c0_seq5	2659.68	2606.22	2222.33	53.49	35.95
comp100036_c1	comp100036_c1_seq1,comp100036_c1_seq2,comp100036_c1_seq3,comp100036_c1_seq4	2818.28	2764.82	72	1.63	1.1
comp100037_c0	comp100037_c0_seq1	534	480.58	13	1.71	1.15
comp100037_c1	comp100037_c1_seq1,comp100037_c1_seq2,comp100037_c1_seq3,comp100037_c1_seq4,comp100037_c1_seq5	1207.21	1153.75	136	7.41	4.98
comp100037_c2	comp100037_c2_seq1,comp100037_c2_seq2	1498.26	1444.8	3098.12	134.75	90.57
comp100038_c0	comp100038_c0_seq1,comp100038_c0_seq2	1729.49	1676.03	353.01	13.23	8.89
comp100038_c1	comp100038_c1_seq1,comp100038_c1_seq2,comp100038_c1_seq3	591.83	538.4	34	3.99	2.68
comp100038_c3	comp100038_c3_seq1	677	623.55	4	0.41	0.27
comp100038_c4	comp100038_c4_seq1	695	641.55	9	0.89	0.6
comp100038_c5	comp100038_c5_seq1,comp100038_c5_seq2	593	539.56	3	0.35	0.24
comp100038_c8	comp100038_c8_seq1,comp100038_c8_seq2,comp100038_c8_seq3,comp100038_c8_seq4,comp100038_c8_seq5	521.17	467.75	26	3.52	2.37
comp100039_c1	comp100039_c1_seq1,comp100039_c1_seq2,comp100039_c1_seq3,comp100039_c1_seq4,comp100039_c1_seq5	1296.74	1243.28	10	0.51	0.34
comp100040_c0	comp100040_c0_seq1,comp100040_c0_seq2,comp100040_c0_seq3,comp100040_c0_seq4,comp100040_c0_seq5	1514.32	1460.86	193	8.3	5.58
comp100041_c0	comp100041_c0_seq1,comp100041_c0_seq2,comp100041_c0_seq3,comp100041_c0_seq4,comp100041_c0_seq5	1198.66	1145.21	81	4.45	2.99
comp100041_c1	comp100041_c1_seq1,comp100041_c1_seq2,comp100041_c1_seq3,comp100041_c1_seq4,comp100041_c1_seq5	2369.16	2315.71	216	5.85	3.93
comp100041_c3	comp100041_c3_seq1	779	725.54	11	0.96	0.64
comp100042_c0	comp100042_c0_seq1	713	659.55	36	3.45	2.32
comp100042_c1	comp100042_c1_seq1,comp100042_c1_seq2	506	452.59	3	0.42	0.28
comp100042_c4	comp100042_c4_seq2,comp100042_c4_seq3,comp100042_c4_seq5	930	876.54	7	0.5	0.34
comp100042_c5	comp100042_c5_seq1	503	449.59	2	0.28	0.19
comp100043_c0	comp100043_c0_seq1,comp100043_c0_seq2,comp100043_c0_seq3,comp100043_c0_seq4	2267.15	2213.69	3656.32	103.65	69.67
comp100043_c1	comp100043_c1_seq1	522	468.58	27	3.65	2.45
comp100044_c0	comp100044_c0_seq1,comp100044_c0_seq2,comp100044_c0_seq4	768.27	714.82	13	1.15	0.77
comp100045_c0	comp100045_c0_seq2,comp100045_c0_seq4	610.38	556.95	14	1.59	1.07
comp100045_c1	comp100045_c1_seq1,comp100045_c1_seq2	767	713.54	34	3.01	2.02
comp100045_c2	comp100045_c2_seq1,comp100045_c2_seq2	589	535.56	5	0.59	0.4
comp100046_c0	comp100046_c0_seq1,comp100046_c0_seq2	2199.54	2146.08	27	0.79	0.53
comp100047_c0	comp100047_c0_seq1,comp100047_c0_seq2	640	586.56	19	2.05	1.38
comp100047_c3	comp100047_c3_seq1,comp100047_c3_seq2,comp100047_c3_seq3,comp100047_c3_seq5	850.99	797.56	18	1.42	0.96
comp100047_c5	comp100047_c5_seq1	1347	1293.54	7	0.34	0.23
comp100048_c0	comp100048_c0_seq1,comp100048_c0_seq2,comp100048_c0_seq3,comp100048_c0_seq4,comp100048_c0_seq5	1514.87	1461.41	323.08	13.89	9.34
comp100050_c1	comp100050_c1_seq1,comp100050_c1_seq2,comp100050_c1_seq3,comp100050_c1_seq4,comp100050_c1_seq5	2126.05	2072.59	611.13	18.51	12.44
comp100051_c0	comp100051_c0_seq1,comp100051_c0_seq2,comp100051_c0_seq3,comp100051_c0_seq4,comp100051_c0_seq5	1764.79	1711.33	58.21	2.14	1.44
comp100052_c0	comp100052_c0_seq1	2537	2483.54	336	8.49	5.7
comp100053_c0	comp100053_c0_seq1,comp100053_c0_seq2,comp100053_c0_seq3	1280.53	1227.07	120	6.15	4.13
comp100054_c1	comp100054_c1_seq1,comp100054_c1_seq2,comp100054_c1_seq3,comp100054_c1_seq4,comp100054_c1_seq5	2899.42	2845.96	552	12.16	8.18
comp100055_c0	comp100055_c0_seq2,comp100055_c0_seq3,comp100055_c0_seq4,comp100055_c0_seq5	1776.4	1722.94	1075.74	39.21	26.35
comp100056_c0	comp100056_c0_seq1,comp100056_c0_seq2	5017.4	4963.94	658.78	8.32	5.59
comp100057_c0	comp100057_c0_seq1,comp100057_c0_seq2,comp100057_c0_seq3,comp100057_c0_seq4	1788.36	1734.9	173.12	6.27	4.21
comp100058_c0	comp100058_c0_seq1,comp100058_c0_seq2,comp100058_c0_seq3,comp100058_c0_seq4,comp100058_c0_seq5	1258.31	1204.85	71	3.71	2.49
comp100059_c0	comp100059_c0_seq1	1332	1278.54	188.94	9.29	6.24
comp100061_c0	comp100061_c0_seq1,comp100061_c0_seq2,comp100061_c0_seq3,comp100061_c0_seq4,comp100061_c0_seq5	1798.44	1744.98	308	11.08	7.45
comp100062_c1	comp100062_c1_seq1,comp100062_c1_seq2,comp100062_c1_seq3,comp100062_c1_seq5	710.07	656.63	10	0.96	0.65
comp100063_c0	comp100063_c0_seq1,comp100063_c0_seq2,comp100063_c0_seq3,comp100063_c0_seq4,comp100063_c0_seq5	1098.31	1044.85	31.65	1.91	1.28
comp100064_c1	comp100064_c1_seq1,comp100064_c1_seq2	2376.57	2323.11	247.99	6.7	4.5
comp100065_c0	comp100065_c0_seq1	927	873.54	68.76	4.96	3.33
comp1000654_c0	comp1000654_c0_seq1	676	622.55	0	0	0
comp100066_c0	comp100066_c0_seq1,comp100066_c0_seq2,comp100066_c0_seq3,comp100066_c0_seq4,comp100066_c0_seq5	2191.21	2137.75	9	0.26	0.18
comp100066_c1	comp100066_c1_seq1	920	866.54	9	0.65	0.44
comp100067_c1	comp100067_c1_seq1,comp100067_c1_seq2,comp100067_c1_seq3,comp100067_c1_seq4	3558.09	3504.63	2196.62	39.29	26.41
comp100068_c0	comp100068_c0_seq1	621	567.56	4	0.45	0.3
comp100068_c1	comp100068_c1_seq1	5441	5387.54	512.73	5.96	4.01
comp100069_c0	comp100069_c0_seq1,comp100069_c0_seq2,comp100069_c0_seq3,comp100069_c0_seq4	1027.39	973.94	9	0.58	0.39
comp100069_c1	comp100069_c1_seq1	541	487.58	3	0.39	0.26
comp100070_c2	comp100070_c2_seq1,comp100070_c2_seq2,comp100070_c2_seq4,comp100070_c2_seq5	725.42	671.97	59	5.54	3.72
comp100070_c4	comp100070_c4_seq1,comp100070_c4_seq2,comp100070_c4_seq3,comp100070_c4_seq4,comp100070_c4_seq5	687.88	634.43	58.06	5.78	3.88
comp100071_c0	comp100071_c0_seq1,comp100071_c0_seq2	3105.97	3052.51	831	17.07	11.47
comp100072_c0	comp100072_c0_seq1,comp100072_c0_seq2,comp100072_c0_seq3,comp100072_c0_seq4,comp100072_c0_seq5	12201.9	12148.5	919.69	4.74	3.19
comp100073_c0	comp100073_c0_seq1	2293	2239.54	3308.38	92.7	62.31
comp100074_c0	comp100074_c0_seq1	2334	2280.54	9	0.25	0.17
comp100075_c0	comp100075_c0_seq1	3455	3401.54	756.04	13.94	9.37
comp100076_c1	comp100076_c1_seq1,comp100076_c1_seq2,comp100076_c1_seq3,comp100076_c1_seq4,comp100076_c1_seq5	953.92	900.46	82	5.74	3.86
comp100076_c2	comp100076_c2_seq1,comp100076_c2_seq2,comp100076_c2_seq3,comp100076_c2_seq4	599.97	546.53	21	2.43	1.63
comp100077_c0	comp100077_c0_seq1,comp100077_c0_seq2,comp100077_c0_seq4	733.24	679.79	49.07	4.56	3.06
comp100078_c0	comp100078_c0_seq2	2049	1995.54	3385.87	106.51	71.59
comp100080_c0	comp100080_c0_seq1	1148	1094.54	11	0.63	0.43
comp100080_c1	comp100080_c1_seq1,comp100080_c1_seq2,comp100080_c1_seq3	1515.03	1461.58	198	8.51	5.72
comp100080_c2	comp100080_c2_seq1,comp100080_c2_seq2,comp100080_c2_seq3,comp100080_c2_seq4,comp100080_c2_seq5	1219.21	1165.76	246.03	13.27	8.92
comp100080_c3	comp100080_c3_seq2,comp100080_c3_seq3,comp100080_c3_seq5	1429.77	1376.31	19	0.87	0.58
comp100081_c1	comp100081_c1_seq1,comp100081_c1_seq2,comp100081_c1_seq3,comp100081_c1_seq4,comp100081_c1_seq5	2583.67	2530.21	37	0.92	0.62
comp100081_c2	comp100081_c2_seq1	1599	1545.54	121	4.92	3.31
comp100082_c0	comp100082_c0_seq1,comp100082_c0_seq2,comp100082_c0_seq3,comp100082_c0_seq4,comp100082_c0_seq5	3228.63	3175.17	349	6.89	4.63
comp100082_c1	comp100082_c1_seq1,comp100082_c1_seq2	1156.51	1103.06	34	1.94	1.3
comp100082_c2	comp100082_c2_seq1,comp100082_c2_seq3,comp100082_c2_seq4	773.18	719.73	29	2.54	1.71
comp100082_c7	comp100082_c7_seq1	718	664.55	3	0.28	0.19
comp100083_c0	comp100083_c0_seq2,comp100083_c0_seq3	520	466.58	4	0.54	0.36
comp100083_c1	comp100083_c1_seq1,comp100083_c1_seq2,comp100083_c1_seq3	598.55	545.11	12	1.39	0.94
comp100083_c4	comp100083_c4_seq1,comp100083_c4_seq2,comp100083_c4_seq3	1289	1235.54	18	0.92	0.62
comp100083_c5	comp100083_c5_seq1	585	531.56	35	4.16	2.8
comp100083_c6	comp100083_c6_seq1,comp100083_c6_seq3,comp100083_c6_seq4,comp100083_c6_seq5	2343.04	2289.58	249	6.82	4.59
comp100084_c0	comp100084_c0_seq1	3757	3703.54	11171.1	189.08	127.09
comp100085_c0	comp100085_c0_seq1	569	515.57	8	0.98	0.66
comp100085_c2	comp100085_c2_seq1,comp100085_c2_seq3,comp100085_c2_seq4,comp100085_c2_seq5	2356.98	2303.53	68	1.85	1.24
comp100086_c0	comp100086_c0_seq1,comp100086_c0_seq2,comp100086_c0_seq3,comp100086_c0_seq4,comp100086_c0_seq5	1366.42	1312.96	47.9	2.29	1.54
comp100087_c0	comp100087_c0_seq1,comp100087_c0_seq2,comp100087_c0_seq3,comp100087_c0_seq4,comp100087_c0_seq5	4829.43	4775.97	1561.79	20.49	13.77
comp100088_c0	comp100088_c0_seq1,comp100088_c0_seq2,comp100088_c0_seq3,comp100088_c0_seq4,comp100088_c0_seq5	1575.06	1521.6	94	3.88	2.61
comp100089_c1	comp100089_c1_seq1	1033	979.54	7.01	0.45	0.3
comp100089_c2	comp100089_c2_seq1,comp100089_c2_seq2,comp100089_c2_seq3,comp100089_c2_seq4,comp100089_c2_seq5	1157.93	1104.48	57	3.25	2.18
comp100090_c0	comp100090_c0_seq1	608	554.56	40	4.56	3.06
comp100091_c0	comp100091_c0_seq1,comp100091_c0_seq2,comp100091_c0_seq3,comp100091_c0_seq4	726.45	673	23	2.16	1.45
comp100091_c2	comp100091_c2_seq1	506	452.59	1	0.14	0.09
comp100092_c0	comp100092_c0_seq1,comp100092_c0_seq2,comp100092_c0_seq3	1088.84	1035.38	91	5.53	3.72
comp100093_c0	comp100093_c0_seq1	500	446.59	48	6.81	4.58
comp100093_c2	comp100093_c2_seq1	1175	1121.54	92	5.16	3.47
comp100093_c3	comp100093_c3_seq2,comp100093_c3_seq4,comp100093_c3_seq5	877.27	823.81	22	1.68	1.13
comp100094_c1	comp100094_c1_seq1,comp100094_c1_seq2,comp100094_c1_seq3,comp100094_c1_seq4	1258.43	1204.97	565.45	29.51	19.84
comp100095_c0	comp100095_c0_seq1,comp100095_c0_seq2	3037.67	2984.21	1483.25	31.17	20.95
comp100096_c0	comp100096_c0_seq1,comp100096_c0_seq2	1702	1648.54	36	1.37	0.92
comp100097_c0	comp100097_c0_seq1,comp100097_c0_seq2	814.44	760.98	11	0.91	0.61
comp100098_c0	comp100098_c0_seq1,comp100098_c0_seq2,comp100098_c0_seq3,comp100098_c0_seq4,comp100098_c0_seq5	1409.22	1355.76	60	2.78	1.87
comp100098_c1	comp100098_c1_seq1,comp100098_c1_seq2,comp100098_c1_seq3	545.49	492.07	17	2.19	1.47
comp100099_c3	comp100099_c3_seq1,comp100099_c3_seq2,comp100099_c3_seq3,comp100099_c3_seq4,comp100099_c3_seq5	807.98	754.52	309.3	25.85	17.37
comp10010_c0	comp10010_c0_seq1	549	495.57	2	0.26	0.17
comp100100_c0	comp100100_c0_seq1,comp100100_c0_seq2,comp100100_c0_seq3	1060.51	1007.05	33	2.06	1.39
comp100100_c1	comp100100_c1_seq1,comp100100_c1_seq2	3213.32	3159.86	246.99	4.9	3.29
comp100100_c2	comp100100_c2_seq1,comp100100_c2_seq2,comp100100_c2_seq3,comp100100_c2_seq4	2435.55	2382.09	1136.99	29.95	20.13
comp100101_c0	comp100101_c0_seq1,comp100101_c0_seq2,comp100101_c0_seq3,comp100101_c0_seq4,comp100101_c0_seq5	2821.27	2767.82	228	5.17	3.47
comp100101_c2	comp100101_c2_seq1	564	510.57	16	1.98	1.33
comp100101_c3	comp100101_c3_seq1	661	607.55	6	0.62	0.42
comp100102_c0	comp100102_c0_seq1,comp100102_c0_seq2,comp100102_c0_seq3,comp100102_c0_seq4	1012	958.54	22	1.45	0.97
comp100103_c0	comp100103_c0_seq1,comp100103_c0_seq2,comp100103_c0_seq3,comp100103_c0_seq4,comp100103_c0_seq5	1697.55	1644.09	1551.16	59.26	39.83
comp100104_c0	comp100104_c0_seq1,comp100104_c0_seq2,comp100104_c0_seq3,comp100104_c0_seq4,comp100104_c0_seq5	2663.87	2610.41	191.92	4.61	3.1
comp100104_c2	comp100104_c2_seq1,comp100104_c2_seq2,comp100104_c2_seq3,comp100104_c2_seq4,comp100104_c2_seq5	866.11	812.67	68	5.27	3.54
comp100104_c3	comp100104_c3_seq1,comp100104_c3_seq2	1165.47	1112.01	7	0.4	0.27
comp100105_c0	comp100105_c0_seq2	912	858.54	36	2.64	1.78
comp100106_c0	comp100106_c0_seq1,comp100106_c0_seq2,comp100106_c0_seq3,comp100106_c0_seq4,comp100106_c0_seq5	2308.58	2255.12	63.01	1.75	1.18
comp100107_c0	comp100107_c0_seq1,comp100107_c0_seq3	560	506.57	4	0.5	0.34
comp100108_c1	comp100108_c1_seq1,comp100108_c1_seq3,comp100108_c1_seq4,comp100108_c1_seq5	1509.03	1455.58	229	9.89	6.64
comp100109_c0	comp100109_c0_seq1,comp100109_c0_seq2,comp100109_c0_seq3,comp100109_c0_seq4,comp100109_c0_seq5	544.58	491.16	13	1.68	1.13
comp100110_c0	comp100110_c0_seq1,comp100110_c0_seq2	699	645.55	12	1.17	0.79
comp100110_c2	comp100110_c2_seq1,comp100110_c2_seq2,comp100110_c2_seq3,comp100110_c2_seq4	726.38	672.93	14	1.31	0.88
comp100111_c0	comp100111_c0_seq1,comp100111_c0_seq2	1205.09	1151.63	37	2.02	1.36
comp100111_c1	comp100111_c1_seq1,comp100111_c1_seq2,comp100111_c1_seq3,comp100111_c1_seq4,comp100111_c1_seq5	1451.73	1398.27	135.34	6.08	4.09
comp100111_c2	comp100111_c2_seq1,comp100111_c2_seq2,comp100111_c2_seq3	3040.43	2986.98	1169	24.54	16.5
comp100111_c3	comp100111_c3_seq1	659	605.55	6	0.63	0.42
comp100111_c5	comp100111_c5_seq1,comp100111_c5_seq2	900	846.54	36	2.68	1.8
comp100111_c6	comp100111_c6_seq1,comp100111_c6_seq2	820	766.54	2	0.16	0.11
comp100112_c0	comp100112_c0_seq1,comp100112_c0_seq3,comp100112_c0_seq4,comp100112_c0_seq5	783.16	729.71	22	1.9	1.28
comp100112_c2	comp100112_c2_seq1,comp100112_c2_seq2,comp100112_c2_seq3,comp100112_c2_seq4,comp100112_c2_seq5	1593.96	1540.52	136	5.55	3.73
comp100112_c3	comp100112_c3_seq1,comp100112_c3_seq2	2113.78	2060.32	91	2.77	1.86
comp100112_c4	comp100112_c4_seq1,comp100112_c4_seq2,comp100112_c4_seq3	1034.71	981.25	105	6.74	4.53
comp100112_c5	comp100112_c5_seq1,comp100112_c5_seq2	603	549.56	8	0.92	0.62
comp100113_c0	comp100113_c0_seq1,comp100113_c0_seq2,comp100113_c0_seq4,comp100113_c0_seq5	649.84	596.4	3	0.32	0.21
comp100113_c1	comp100113_c1_seq1	589	535.56	6	0.71	0.48
comp100114_c0	comp100114_c0_seq1,comp100114_c0_seq2,comp100114_c0_seq3	1741.19	1687.73	972	36.17	24.31
comp100115_c0	comp100115_c0_seq1,comp100115_c0_seq2,comp100115_c0_seq3,comp100115_c0_seq4,comp100115_c0_seq5	904.54	851.08	194	14.36	9.65
comp100116_c0	comp100116_c0_seq1,comp100116_c0_seq2,comp100116_c0_seq3,comp100116_c0_seq4,comp100116_c0_seq5	2199.33	2145.87	167	4.88	3.28
comp100117_c0	comp100117_c0_seq1,comp100117_c0_seq2,comp100117_c0_seq3,comp100117_c0_seq4,comp100117_c0_seq5	3611.25	3557.79	1758.08	30.98	20.82
comp100118_c1	comp100118_c1_seq2	511	457.58	12	1.66	1.12
comp100118_c3	comp100118_c3_seq1,comp100118_c3_seq2,comp100118_c3_seq4,comp100118_c3_seq5	573.1	519.67	24	2.92	1.96
comp100119_c1	comp100119_c1_seq1,comp100119_c1_seq2,comp100119_c1_seq3,comp100119_c1_seq4	5535.85	5482.39	2234	25.53	17.16
comp100119_c2	comp100119_c2_seq1	698	644.55	9	0.88	0.59
comp100120_c2	comp100120_c2_seq1,comp100120_c2_seq2	851	797.54	1.46	0.12	0.08
comp100120_c3	comp100120_c3_seq1,comp100120_c3_seq2,comp100120_c3_seq3,comp100120_c3_seq5	2155.48	2102.02	1233	36.81	24.74
comp100121_c0	comp100121_c0_seq1,comp100121_c0_seq2,comp100121_c0_seq3,comp100121_c0_seq4,comp100121_c0_seq5	1948.61	1895.15	1010	33.46	22.49
comp100121_c1	comp100121_c1_seq1,comp100121_c1_seq2,comp100121_c1_seq3	957	903.54	487	33.95	22.82
comp100122_c0	comp100122_c0_seq1	843	789.54	3	0.24	0.16
comp100122_c2	comp100122_c2_seq1,comp100122_c2_seq2,comp100122_c2_seq3,comp100122_c2_seq4,comp100122_c2_seq5	1836.99	1783.54	550	19.36	13.02
comp100122_c3	comp100122_c3_seq1,comp100122_c3_seq2	1649.55	1596.09	64	2.52	1.69
comp100123_c2	comp100123_c2_seq1,comp100123_c2_seq2,comp100123_c2_seq3,comp100123_c2_seq4,comp100123_c2_seq5	2151.84	2098.38	137.16	4.1	2.76
comp100124_c0	comp100124_c0_seq1,comp100124_c0_seq2,comp100124_c0_seq3,comp100124_c0_seq4,comp100124_c0_seq5	1336.59	1283.13	252.64	12.38	8.32
comp100125_c0	comp100125_c0_seq1,comp100125_c0_seq2,comp100125_c0_seq3,comp100125_c0_seq4	1425.26	1371.8	307	14.07	9.45
comp100126_c0	comp100126_c0_seq1	1970	1916.54	1720.22	56.35	37.87
comp100127_c0	comp100127_c0_seq1,comp100127_c0_seq2,comp100127_c0_seq3	775.04	721.61	20	1.75	1.17
comp100128_c1	comp100128_c1_seq2,comp100128_c1_seq3,comp100128_c1_seq4,comp100128_c1_seq5	1592.9	1539.44	31	1.27	0.85
comp100128_c2	comp100128_c2_seq1,comp100128_c2_seq2,comp100128_c2_seq3,comp100128_c2_seq4,comp100128_c2_seq5	1419.94	1366.48	376.02	17.29	11.62
comp100129_c0	comp100129_c0_seq1,comp100129_c0_seq2	2702.71	2649.25	397	9.4	6.32
comp100130_c0	comp100130_c0_seq1	1177	1123.54	220	12.32	8.28
comp100130_c1	comp100130_c1_seq1	646	592.55	28	2.99	2.01
comp100130_c2	comp100130_c2_seq1,comp100130_c2_seq2,comp100130_c2_seq3,comp100130_c2_seq4,comp100130_c2_seq5	1372.14	1318.68	148.96	7.1	4.77
comp100131_c0	comp100131_c0_seq1	2167	2113.54	4246.99	126.11	84.77
comp100132_c0	comp100132_c0_seq2,comp100132_c0_seq3	1436.77	1383.31	44.01	2	1.34
comp100133_c0	comp100133_c0_seq1,comp100133_c0_seq2,comp100133_c0_seq3,comp100133_c0_seq4,comp100133_c0_seq5	1252.8	1199.34	103	5.4	3.63
comp100134_c0	comp100134_c0_seq1,comp100134_c0_seq2	2923.03	2869.57	645	14.1	9.47
comp100135_c0	comp100135_c0_seq1,comp100135_c0_seq2,comp100135_c0_seq3,comp100135_c0_seq4,comp100135_c0_seq5	1350	1296.54	12.19	0.59	0.4
comp100135_c4	comp100135_c4_seq1,comp100135_c4_seq3,comp100135_c4_seq4,comp100135_c4_seq5	1066.82	1013.36	17.68	1.1	0.74
comp100136_c0	comp100136_c0_seq1,comp100136_c0_seq2,comp100136_c0_seq3,comp100136_c0_seq4,comp100136_c0_seq5	1768.25	1714.79	34	1.25	0.84
comp100137_c1	comp100137_c1_seq1,comp100137_c1_seq2	2375	2321.54	47	1.27	0.85
comp100138_c0	comp100138_c0_seq1,comp100138_c0_seq2,comp100138_c0_seq3	1000.55	947.09	1203.86	80.04	53.8
comp100139_c0	comp100139_c0_seq1	2838	2784.54	95	2.14	1.44
comp100141_c0	comp100141_c0_seq1	6244	6190.54	466	4.72	3.17
comp100142_c0	comp100142_c0_seq1	626	572.56	62	6.84	4.6
comp100142_c1	comp100142_c1_seq1,comp100142_c1_seq2	1005.83	952.37	35	2.31	1.56
comp100142_c2	comp100142_c2_seq2,comp100142_c2_seq4	559.59	506.17	45	5.63	3.78
comp100143_c0	comp100143_c0_seq1,comp100143_c0_seq2	552.4	498.98	10	1.27	0.85
comp100144_c0	comp100144_c0_seq2,comp100144_c0_seq3,comp100144_c0_seq4,comp100144_c0_seq5	2351.03	2297.57	587.38	16.04	10.78
comp100145_c0	comp100145_c0_seq1,comp100145_c0_seq2,comp100145_c0_seq3,comp100145_c0_seq4,comp100145_c0_seq5	1394.31	1340.85	79	3.7	2.49
comp100146_c0	comp100146_c0_seq1	644	590.55	0	0	0
comp100146_c1	comp100146_c1_seq1,comp100146_c1_seq2,comp100146_c1_seq3,comp100146_c1_seq5	642.75	589.31	0	0	0
comp100147_c0	comp100147_c0_seq1,comp100147_c0_seq2	586.04	532.61	41	4.87	3.27
comp100147_c1	comp100147_c1_seq2,comp100147_c1_seq3,comp100147_c1_seq5	545.02	491.59	34	4.38	2.94
comp100148_c1	comp100148_c1_seq1	734	680.55	1	0.09	0.06
comp100148_c2	comp100148_c2_seq1,comp100148_c2_seq2,comp100148_c2_seq3	1691.88	1638.43	191	7.32	4.92
comp100149_c0	comp100149_c0_seq2,comp100149_c0_seq3,comp100149_c0_seq4,comp100149_c0_seq5	1228.45	1175	38.93	2.08	1.4
comp100150_c0	comp100150_c0_seq1	1132	1078.54	21	1.23	0.82
comp100150_c1	comp100150_c1_seq1,comp100150_c1_seq2	2199.68	2146.22	548.96	16.05	10.79
comp100150_c2	comp100150_c2_seq1,comp100150_c2_seq3,comp100150_c2_seq4,comp100150_c2_seq5	3903.34	3849.88	4188.01	68.19	45.83
comp100151_c0	comp100151_c0_seq1,comp100151_c0_seq2	1355.96	1302.5	39.99	1.93	1.3
comp100152_c0	comp100152_c0_seq1	678	624.55	13	1.31	0.88
comp100152_c1	comp100152_c1_seq1,comp100152_c1_seq3,comp100152_c1_seq5	1167	1113.54	45	2.54	1.71
comp100152_c2	comp100152_c2_seq1,comp100152_c2_seq3,comp100152_c2_seq4,comp100152_c2_seq5	1071.61	1018.17	132.61	8.2	5.51
comp100152_c6	comp100152_c6_seq1	650	596.55	15	1.59	1.07
comp100153_c0	comp100153_c0_seq1,comp100153_c0_seq2,comp100153_c0_seq3	707.9	654.46	44	4.24	2.85
comp100154_c1	comp100154_c1_seq1,comp100154_c1_seq2,comp100154_c1_seq4,comp100154_c1_seq5	1781.6	1728.14	105	3.82	2.56
comp100155_c0	comp100155_c0_seq1,comp100155_c0_seq2,comp100155_c0_seq3,comp100155_c0_seq4,comp100155_c0_seq5	1116.34	1062.9	220.97	13.08	8.79
comp100156_c0	comp100156_c0_seq1,comp100156_c0_seq2,comp100156_c0_seq3,comp100156_c0_seq4,comp100156_c0_seq5	1859.04	1805.58	153.17	5.33	3.58
comp100157_c0	comp100157_c0_seq1,comp100157_c0_seq2,comp100157_c0_seq5	1483.21	1429.75	242.99	10.68	7.18
comp100158_c1	comp100158_c1_seq1,comp100158_c1_seq2,comp100158_c1_seq3,comp100158_c1_seq4,comp100158_c1_seq5	4985.12	4931.66	17871.5	227.08	152.63
comp100159_c0	comp100159_c0_seq1,comp100159_c0_seq2,comp100159_c0_seq3	1987.28	1933.82	174	5.65	3.8
comp100160_c1	comp100160_c1_seq1,comp100160_c1_seq2,comp100160_c1_seq3,comp100160_c1_seq4,comp100160_c1_seq5	1104.38	1050.93	292	17.48	11.75
comp100160_c3	comp100160_c3_seq1,comp100160_c3_seq2	857	803.54	4	0.31	0.21
comp100160_c4	comp100160_c4_seq1,comp100160_c4_seq2,comp100160_c4_seq3,comp100160_c4_seq4,comp100160_c4_seq5	2546.3	2492.84	571.07	14.37	9.66
comp100161_c2	comp100161_c2_seq1,comp100161_c2_seq2,comp100161_c2_seq3,comp100161_c2_seq4,comp100161_c2_seq5	768.67	715.22	218.1	19.24	12.93
comp1001616_c0	comp1001616_c0_seq1	624	570.56	2	0.22	0.15
comp100162_c0	comp100162_c0_seq1,comp100162_c0_seq2,comp100162_c0_seq3,comp100162_c0_seq4	1141.11	1087.65	29.95	1.73	1.16
comp100162_c2	comp100162_c2_seq1,comp100162_c2_seq2,comp100162_c2_seq3,comp100162_c2_seq4,comp100162_c2_seq5	1525.14	1471.68	35	1.49	1
comp100163_c0	comp100163_c0_seq1,comp100163_c0_seq2,comp100163_c0_seq3,comp100163_c0_seq4,comp100163_c0_seq5	1277.17	1223.71	445.19	22.88	15.38
comp100163_c1	comp100163_c1_seq1,comp100163_c1_seq2,comp100163_c1_seq3,comp100163_c1_seq4,comp100163_c1_seq5	1390.8	1337.34	412.01	19.37	13.02
comp100164_c1	comp100164_c1_seq1,comp100164_c1_seq2,comp100164_c1_seq4,comp100164_c1_seq5	1225.22	1171.76	24	1.29	0.87
comp100165_c0	comp100165_c0_seq1	1456	1402.54	1223	54.8	36.83
comp100165_c1	comp100165_c1_seq1	712	658.55	445	42.66	28.67
comp100165_c2	comp100165_c2_seq1	2257	2203.54	268.14	7.64	5.13
comp100166_c0	comp100166_c0_seq1	1634	1580.54	3	0.12	0.08
comp100166_c1	comp100166_c1_seq1	733	679.55	1	0.09	0.06
comp100166_c2	comp100166_c2_seq1,comp100166_c2_seq2,comp100166_c2_seq3,comp100166_c2_seq4,comp100166_c2_seq5	1219.41	1165.95	14	0.76	0.51
comp100166_c3	comp100166_c3_seq1	559	505.57	0	0	0
comp100167_c0	comp100167_c0_seq1,comp100167_c0_seq2,comp100167_c0_seq3	2254.81	2201.35	113	3.22	2.17
comp100168_c0	comp100168_c0_seq3,comp100168_c0_seq4,comp100168_c0_seq5	1533.35	1479.89	203	8.62	5.79
comp100168_c1	comp100168_c1_seq1	2987	2933.54	936.1	20.01	13.45
comp100169_c0	comp100169_c0_seq1,comp100169_c0_seq2,comp100169_c0_seq3,comp100169_c0_seq4,comp100169_c0_seq5	3453.12	3399.66	1522.96	28.09	18.88
comp100170_c0	comp100170_c0_seq1,comp100170_c0_seq2,comp100170_c0_seq3,comp100170_c0_seq4	827.82	774.36	28	2.28	1.53
comp100171_c0	comp100171_c0_seq1	3144	3090.54	1838.14	37.3	25.07
comp100172_c0	comp100172_c0_seq1,comp100172_c0_seq2,comp100172_c0_seq4	788.22	734.77	26	2.23	1.5
comp100172_c1	comp100172_c1_seq2,comp100172_c1_seq5	616.4	562.97	28	3.14	2.11
comp100173_c0	comp100173_c0_seq1	1939	1885.54	813.65	27.09	18.21
comp100174_c0	comp100174_c0_seq1,comp100174_c0_seq2,comp100174_c0_seq3,comp100174_c0_seq4,comp100174_c0_seq5	2105.26	2051.8	972.82	29.76	20
comp100174_c1	comp100174_c1_seq1,comp100174_c1_seq2,comp100174_c1_seq3,comp100174_c1_seq4,comp100174_c1_seq5	3169.29	3115.83	664.13	13.37	8.98
comp100174_c2	comp100174_c2_seq1,comp100174_c2_seq3	893	839.54	0	0	0
comp100174_c3	comp100174_c3_seq1	523	469.58	18	2.43	1.63
comp100174_c4	comp100174_c4_seq1	1278	1224.54	0	0	0
comp100174_c5	comp100174_c5_seq1	516	462.58	0	0	0
comp100175_c0	comp100175_c0_seq1,comp100175_c0_seq2,comp100175_c0_seq3,comp100175_c0_seq4,comp100175_c0_seq5	2431.37	2377.91	793.59	20.94	14.07
comp100176_c0	comp100176_c0_seq1,comp100176_c0_seq2,comp100176_c0_seq3,comp100176_c0_seq4,comp100176_c0_seq5	682.23	628.78	62	6.23	4.19
comp100176_c1	comp100176_c1_seq1	850	796.54	26	2.06	1.38
comp100176_c2	comp100176_c2_seq1	597	543.56	0	0	0
comp100177_c0	comp100177_c0_seq1	1341	1287.54	12	0.59	0.39
comp100178_c0	comp100178_c0_seq1	3406	3352.54	41	0.77	0.52
comp100178_c1	comp100178_c1_seq1	730	676.55	8	0.75	0.5
comp100179_c0	comp100179_c0_seq1,comp100179_c0_seq2,comp100179_c0_seq3,comp100179_c0_seq4,comp100179_c0_seq5	1834.4	1780.94	1033.03	36.42	24.48
comp100179_c1	comp100179_c1_seq1	606	552.56	93	10.64	7.15
comp100180_c0	comp100180_c0_seq1	837	783.54	18	1.45	0.97
comp100180_c1	comp100180_c1_seq1,comp100180_c1_seq2,comp100180_c1_seq3,comp100180_c1_seq4,comp100180_c1_seq5	4437.64	4384.18	1643	23.49	15.79
comp100181_c0	comp100181_c0_seq1,comp100181_c0_seq2,comp100181_c0_seq3,comp100181_c0_seq4,comp100181_c0_seq5	1213.62	1160.16	45	2.44	1.64
comp100181_c1	comp100181_c1_seq1,comp100181_c1_seq2	883.96	830.51	25	1.9	1.28
comp100181_c2	comp100181_c2_seq1,comp100181_c2_seq2,comp100181_c2_seq3	851.99	798.53	59	4.66	3.13
comp100181_c3	comp100181_c3_seq1,comp100181_c3_seq2,comp100181_c3_seq3	1043.46	990	18	1.14	0.77
comp100182_c2	comp100182_c2_seq2,comp100182_c2_seq4,comp100182_c2_seq5	887	833.54	23	1.74	1.17
comp100183_c1	comp100183_c1_seq1	828	774.54	34	2.77	1.86
comp100183_c3	comp100183_c3_seq1,comp100183_c3_seq2,comp100183_c3_seq3,comp100183_c3_seq4,comp100183_c3_seq5	1642.27	1588.82	8648.48	341.93	229.82
comp100184_c2	comp100184_c2_seq1,comp100184_c2_seq2	724.55	671.09	15	1.41	0.95
comp100184_c3	comp100184_c3_seq1,comp100184_c3_seq2,comp100184_c3_seq3,comp100184_c3_seq4	823.64	770.19	66	5.4	3.63
comp100185_c0	comp100185_c0_seq1,comp100185_c0_seq2,comp100185_c0_seq3,comp100185_c0_seq4,comp100185_c0_seq5	2169.53	2116.07	503.02	14.92	10.03
comp100186_c0	comp100186_c0_seq1,comp100186_c0_seq2,comp100186_c0_seq3	4200.13	4146.67	2355.01	35.6	23.93
comp100187_c0	comp100187_c0_seq1,comp100187_c0_seq2,comp100187_c0_seq3,comp100187_c0_seq4,comp100187_c0_seq5	1156.96	1103.51	83.52	4.76	3.2
comp100188_c0	comp100188_c0_seq1	733	679.55	4	0.37	0.25
comp100188_c1	comp100188_c1_seq1,comp100188_c1_seq3,comp100188_c1_seq4,comp100188_c1_seq5	1845.87	1792.41	53	1.86	1.25
comp100188_c2	comp100188_c2_seq1	657	603.55	6	0.63	0.42
comp100189_c1	comp100189_c1_seq1	795	741.54	36	3.06	2.06
comp100190_c0	comp100190_c0_seq1	547	493.57	2	0.26	0.17
comp100190_c1	comp100190_c1_seq2,comp100190_c1_seq3,comp100190_c1_seq4,comp100190_c1_seq5	810.93	757.47	20	1.66	1.12
comp100191_c0	comp100191_c0_seq1,comp100191_c0_seq2,comp100191_c0_seq3,comp100191_c0_seq4,comp100191_c0_seq5	1352.81	1299.36	43	2.08	1.4
comp100191_c2	comp100191_c2_seq1,comp100191_c2_seq2	982	928.54	38	2.58	1.73
comp100192_c0	comp100192_c0_seq1,comp100192_c0_seq2,comp100192_c0_seq3,comp100192_c0_seq4,comp100192_c0_seq5	1155.13	1101.67	149	8.51	5.72
comp100192_c1	comp100192_c1_seq1	660	606.55	0	0	0
comp100193_c0	comp100193_c0_seq1,comp100193_c0_seq2,comp100193_c0_seq4,comp100193_c0_seq5	1235.67	1182.21	12	0.64	0.43
comp100194_c0	comp100194_c0_seq1,comp100194_c0_seq2,comp100194_c0_seq3,comp100194_c0_seq4,comp100194_c0_seq5	1383.43	1329.97	82	3.88	2.61
comp100195_c0	comp100195_c0_seq1	1720	1666.54	9	0.34	0.23
comp100195_c1	comp100195_c1_seq1	1994	1940.54	142	4.59	3.09
comp100196_c0	comp100196_c0_seq1,comp100196_c0_seq2	3561.45	3507.99	2025.07	36.19	24.32
comp100197_c0	comp100197_c0_seq1,comp100197_c0_seq2	1234	1180.54	21	1.12	0.75
comp100197_c1	comp100197_c1_seq2,comp100197_c1_seq3,comp100197_c1_seq4,comp100197_c1_seq5	2474.21	2420.75	233.25	6.05	4.06
comp100198_c0	comp100198_c0_seq1,comp100198_c0_seq2,comp100198_c0_seq3,comp100198_c0_seq4,comp100198_c0_seq5	2878.03	2824.58	469.67	10.43	7.01
comp100199_c0	comp100199_c0_seq1,comp100199_c0_seq2	1145	1091.54	42	2.42	1.63
comp100199_c1	comp100199_c1_seq1,comp100199_c1_seq2,comp100199_c1_seq3	1278.75	1225.29	4770.47	244.83	164.56
comp100200_c0	comp100200_c0_seq1,comp100200_c0_seq2,comp100200_c0_seq3,comp100200_c0_seq5	695.13	641.68	34.02	3.35	2.25
comp100201_c0	comp100201_c0_seq1	608	554.56	14	1.6	1.07
comp100201_c2	comp100201_c2_seq1,comp100201_c2_seq2,comp100201_c2_seq3,comp100201_c2_seq5	1203.22	1149.76	247	13.51	9.08
comp100202_c0	comp100202_c0_seq1,comp100202_c0_seq2,comp100202_c0_seq3,comp100202_c0_seq4	555.68	502.26	52	6.55	4.4
comp100203_c0	comp100203_c0_seq1	502	448.59	3	0.42	0.28
comp100203_c1	comp100203_c1_seq1,comp100203_c1_seq2,comp100203_c1_seq3,comp100203_c1_seq4,comp100203_c1_seq5	2166.41	2112.95	748	22.22	14.93
comp100204_c0	comp100204_c0_seq1,comp100204_c0_seq2,comp100204_c0_seq3,comp100204_c0_seq4	1858.54	1805.08	1051.11	36.56	24.58
comp100205_c0	comp100205_c0_seq1,comp100205_c0_seq2,comp100205_c0_seq3,comp100205_c0_seq4,comp100205_c0_seq5	1902.02	1848.56	148	5.03	3.38
comp100206_c0	comp100206_c0_seq1,comp100206_c0_seq2,comp100206_c0_seq3,comp100206_c0_seq5	625	571.56	20	2.21	1.49
comp100206_c2	comp100206_c2_seq1	931	877.54	0	0	0
comp100206_c3	comp100206_c3_seq1	723	669.55	3	0.28	0.19
comp100207_c0	comp100207_c0_seq1,comp100207_c0_seq2,comp100207_c0_seq3,comp100207_c0_seq4	2561	2507.54	35	0.88	0.59
comp100208_c0	comp100208_c0_seq1,comp100208_c0_seq2,comp100208_c0_seq3,comp100208_c0_seq4,comp100208_c0_seq5	1666.03	1612.57	415.43	16.18	10.88
comp100209_c0	comp100209_c0_seq1	1161	1107.54	10	0.57	0.38
comp100209_c1	comp100209_c1_seq1,comp100209_c1_seq2,comp100209_c1_seq3,comp100209_c1_seq4	657.87	604.43	13	1.36	0.91
comp10021_c1	comp10021_c1_seq1	1320	1266.54	3	0.15	0.1
comp100210_c0	comp100210_c0_seq1,comp100210_c0_seq2,comp100210_c0_seq4,comp100210_c0_seq5	575.9	522.47	51	6.17	4.15
comp100210_c2	comp100210_c2_seq1,comp100210_c2_seq4,comp100210_c2_seq5	915.54	862.09	55	4.02	2.7
comp100210_c4	comp100210_c4_seq1,comp100210_c4_seq2	635	581.56	29.88	3.25	2.18
comp100210_c5	comp100210_c5_seq1	557	503.57	41	5.15	3.46
comp100211_c0	comp100211_c0_seq1,comp100211_c0_seq2,comp100211_c0_seq3	2377.3	2323.84	449.38	12.13	8.16
comp100212_c0	comp100212_c0_seq1,comp100212_c0_seq2,comp100212_c0_seq3,comp100212_c0_seq4,comp100212_c0_seq5	991.5	938.04	91	6.11	4.11
comp100212_c1	comp100212_c1_seq1,comp100212_c1_seq2,comp100212_c1_seq3,comp100212_c1_seq4,comp100212_c1_seq5	2301.31	2247.85	411.58	11.49	7.72
comp100213_c0	comp100213_c0_seq1	1296	1242.54	20	1.01	0.68
comp100214_c0	comp100214_c0_seq1	997	943.54	10	0.67	0.45
comp100214_c2	comp100214_c2_seq1,comp100214_c2_seq2,comp100214_c2_seq4,comp100214_c2_seq5	1308.71	1255.25	160	8.01	5.39
comp100215_c0	comp100215_c0_seq1	1575	1521.54	605	24.98	16.79
comp100216_c2	comp100216_c2_seq1,comp100216_c2_seq2	620	566.56	0	0	0
comp100216_c4	comp100216_c4_seq1,comp100216_c4_seq2,comp100216_c4_seq3	1146.67	1093.22	0	0	0
comp100216_c5	comp100216_c5_seq3,comp100216_c5_seq4,comp100216_c5_seq5	634.91	581.46	22	2.39	1.61
comp100216_c6	comp100216_c6_seq1,comp100216_c6_seq2	552	498.57	0	0	0
comp100217_c0	comp100217_c0_seq1	664	610.55	11	1.14	0.76
comp100217_c1	comp100217_c1_seq1,comp100217_c1_seq2,comp100217_c1_seq3	1465.44	1411.98	40	1.78	1.2
comp100218_c0	comp100218_c0_seq1,comp100218_c0_seq2,comp100218_c0_seq3,comp100218_c0_seq4,comp100218_c0_seq5	2654.71	2601.25	147.01	3.55	2.38
comp100218_c1	comp100218_c1_seq1,comp100218_c1_seq3,comp100218_c1_seq4	1739.27	1685.81	44	1.64	1.1
comp100218_c2	comp100218_c2_seq1	997	943.54	2	0.13	0.09
comp100219_c0	comp100219_c0_seq1,comp100219_c0_seq2,comp100219_c0_seq3,comp100219_c0_seq4,comp100219_c0_seq5	1171.9	1118.45	397.04	22.33	15.01
comp100220_c2	comp100220_c2_seq1,comp100220_c2_seq2,comp100220_c2_seq4,comp100220_c2_seq5	1563.54	1510.08	251	10.44	7.02
comp100221_c0	comp100221_c0_seq1,comp100221_c0_seq4	1356.85	1303.39	40	1.93	1.3
comp100222_c0	comp100222_c0_seq1,comp100222_c0_seq2,comp100222_c0_seq3	2761.69	2708.23	1830.92	42.4	28.5
comp100223_c0	comp100223_c0_seq1,comp100223_c0_seq2,comp100223_c0_seq3	1070.3	1016.84	221	13.68	9.19
comp100223_c1	comp100223_c1_seq1,comp100223_c1_seq4,comp100223_c1_seq5	800.45	747.01	18	1.52	1.02
comp100224_c0	comp100224_c0_seq1	2403	2349.54	1630	43.53	29.26
comp100225_c1	comp100225_c1_seq1,comp100225_c1_seq3,comp100225_c1_seq5	733.97	680.53	32	2.97	1.99
comp100226_c0	comp100226_c0_seq1	5079	5025.54	4637.75	57.83	38.87
comp1002262_c0	comp1002262_c0_seq1	537	483.58	0	0	0
comp100227_c0	comp100227_c0_seq2,comp100227_c0_seq3,comp100227_c0_seq4,comp100227_c0_seq5	1522.14	1468.68	241.6	10.34	6.95
comp100227_c1	comp100227_c1_seq1	1464	1410.54	87.07	3.88	2.61
comp100228_c0	comp100228_c0_seq2	669	615.55	13	1.33	0.9
comp100228_c1	comp100228_c1_seq1,comp100228_c1_seq2,comp100228_c1_seq3,comp100228_c1_seq4	1281	1227.54	36	1.84	1.24
comp100228_c2	comp100228_c2_seq1,comp100228_c2_seq2,comp100228_c2_seq4	1269.59	1216.13	81	4.19	2.82
comp100228_c3	comp100228_c3_seq1	631	577.56	8	0.88	0.59
comp100228_c5	comp100228_c5_seq1,comp100228_c5_seq3	1225.22	1171.77	53	2.84	1.91
comp100229_c0	comp100229_c0_seq1	1468	1414.54	239	10.62	7.14
comp1002294_c0	comp1002294_c0_seq1	600	546.56	0	0	0
comp10023_c0	comp10023_c0_seq1	806	752.54	3	0.25	0.17
comp100230_c0	comp100230_c0_seq1,comp100230_c0_seq2,comp100230_c0_seq3,comp100230_c0_seq4	1676.9	1623.45	123.03	4.76	3.2
comp100231_c0	comp100231_c0_seq1,comp100231_c0_seq2,comp100231_c0_seq3,comp100231_c0_seq4,comp100231_c0_seq5	1460.66	1407.2	102	4.56	3.06
comp100231_c1	comp100231_c1_seq2	541	487.58	11	1.43	0.96
comp100232_c0	comp100232_c0_seq1,comp100232_c0_seq2,comp100232_c0_seq3	1333	1279.54	668.99	32.87	22.09
comp100233_c0	comp100233_c0_seq1,comp100233_c0_seq2,comp100233_c0_seq3,comp100233_c0_seq4	974.26	920.8	56	3.83	2.57
comp100234_c0	comp100234_c0_seq1,comp100234_c0_seq2,comp100234_c0_seq3,comp100234_c0_seq4,comp100234_c0_seq5	1634.73	1581.27	110	4.37	2.94
comp100235_c0	comp100235_c0_seq1,comp100235_c0_seq2,comp100235_c0_seq3,comp100235_c0_seq4,comp100235_c0_seq5	1782.84	1729.38	1994.23	72.42	48.67
comp100236_c0	comp100236_c0_seq1,comp100236_c0_seq2,comp100236_c0_seq3,comp100236_c0_seq4	2095.4	2041.94	465.96	14.32	9.63
comp100237_c2	comp100237_c2_seq1,comp100237_c2_seq2,comp100237_c2_seq3,comp100237_c2_seq4,comp100237_c2_seq5	1974.03	1920.57	866.33	28.32	19.03
comp100238_c0	comp100238_c0_seq1,comp100238_c0_seq3	645.09	591.65	122.99	13.13	8.83
comp100238_c1	comp100238_c1_seq1	533	479.58	0	0	0
comp100238_c2	comp100238_c2_seq1	645	591.55	38	4.06	2.73
comp100239_c0	comp100239_c0_seq1,comp100239_c0_seq2,comp100239_c0_seq4,comp100239_c0_seq5	1295.48	1242.02	303	15.34	10.31
comp100240_c0	comp100240_c0_seq1,comp100240_c0_seq2,comp100240_c0_seq3,comp100240_c0_seq5	838.19	784.73	76	6.11	4.1
comp100240_c2	comp100240_c2_seq1,comp100240_c2_seq2,comp100240_c2_seq3,comp100240_c2_seq4	990.04	936.59	102	6.86	4.61
comp100241_c0	comp100241_c0_seq1,comp100241_c0_seq2	2115	2061.54	6671.14	203.11	136.52
comp100242_c0	comp100242_c0_seq1,comp100242_c0_seq2,comp100242_c0_seq3,comp100242_c0_seq4	2514.41	2460.95	409	10.43	7.01
comp100243_c0	comp100243_c0_seq1,comp100243_c0_seq2,comp100243_c0_seq3,comp100243_c0_seq4,comp100243_c0_seq5	995.16	941.72	22.09	1.48	0.99
comp100243_c1	comp100243_c1_seq1,comp100243_c1_seq2	947	893.54	17	1.2	0.81
comp100243_c2	comp100243_c2_seq1	1240	1186.54	0	0	0
comp100244_c0	comp100244_c0_seq1,comp100244_c0_seq2	933.79	880.34	64	4.58	3.08
comp100244_c1	comp100244_c1_seq1,comp100244_c1_seq2,comp100244_c1_seq3,comp100244_c1_seq4,comp100244_c1_seq5	2618.42	2564.96	1641.43	40.14	26.98
comp100246_c0	comp100246_c0_seq1,comp100246_c0_seq2,comp100246_c0_seq3,comp100246_c0_seq4,comp100246_c0_seq5	2569.66	2516.2	1796.75	44.8	30.11
comp100247_c0	comp100247_c0_seq1,comp100247_c0_seq2	1569	1515.54	95.34	3.95	2.66
comp100248_c0	comp100248_c0_seq1,comp100248_c0_seq2,comp100248_c0_seq3,comp100248_c0_seq4,comp100248_c0_seq5	979.04	925.58	192.29	13.08	8.79
comp100249_c0	comp100249_c0_seq1	1024	970.54	50	3.24	2.18
comp100249_c1	comp100249_c1_seq1,comp100249_c1_seq2,comp100249_c1_seq3,comp100249_c1_seq4,comp100249_c1_seq5	990.29	936.83	41	2.76	1.85
comp100249_c2	comp100249_c2_seq1	500	446.59	0	0	0
comp100249_c3	comp100249_c3_seq1	784	730.54	23	1.99	1.33
comp100250_c0	comp100250_c0_seq1	2501	2447.54	110	2.82	1.9
comp100251_c0	comp100251_c0_seq1,comp100251_c0_seq2,comp100251_c0_seq3,comp100251_c0_seq4,comp100251_c0_seq5	2013.48	1960.02	96.37	3.09	2.07
comp100252_c0	comp100252_c0_seq1	1971	1917.54	10	0.33	0.22
comp100254_c2	comp100254_c2_seq2	601	547.56	7	0.81	0.54
comp100254_c3	comp100254_c3_seq1,comp100254_c3_seq2,comp100254_c3_seq3,comp100254_c3_seq4,comp100254_c3_seq5	1325.12	1271.67	173	8.55	5.75
comp100255_c0	comp100255_c0_seq1,comp100255_c0_seq2,comp100255_c0_seq3,comp100255_c0_seq4,comp100255_c0_seq5	1183.45	1129.99	84	4.68	3.14
comp100256_c0	comp100256_c0_seq1	803	749.54	1.61	0.14	0.09
comp100257_c0	comp100257_c0_seq2	993	939.54	32	2.14	1.44
comp100258_c0	comp100258_c0_seq1,comp100258_c0_seq2,comp100258_c0_seq3,comp100258_c0_seq4,comp100258_c0_seq5	2893.73	2840.28	64	1.41	0.95
comp1002583_c0	comp1002583_c0_seq1	527	473.58	1	0.13	0.09
comp100259_c0	comp100259_c0_seq1,comp100259_c0_seq2	1761.33	1707.87	328	12.06	8.11
comp10026_c0	comp10026_c0_seq1	823	769.54	4	0.33	0.22
comp100260_c1	comp100260_c1_seq1,comp100260_c1_seq2,comp100260_c1_seq3,comp100260_c1_seq4,comp100260_c1_seq5	1572.04	1518.58	594	24.58	16.52
comp100260_c3	comp100260_c3_seq1,comp100260_c3_seq2,comp100260_c3_seq3,comp100260_c3_seq4,comp100260_c3_seq5	5110.73	5057.27	1610.22	19.95	13.41
comp100261_c0	comp100261_c0_seq1	618	564.56	1	0.11	0.08
comp100261_c1	comp100261_c1_seq1,comp100261_c1_seq2,comp100261_c1_seq3,comp100261_c1_seq4,comp100261_c1_seq5	3384.91	3331.46	4309.8	81.11	54.52
comp100262_c0	comp100262_c0_seq1,comp100262_c0_seq2,comp100262_c0_seq3,comp100262_c0_seq4	2508.44	2454.98	751.98	19.22	12.92
comp100262_c1	comp100262_c1_seq1	609	555.56	12	1.37	0.92
comp100262_c2	comp100262_c2_seq1	611	557.56	3	0.34	0.23
comp100263_c0	comp100263_c0_seq1	1964	1910.54	161	5.29	3.56
comp100264_c0	comp100264_c0_seq1,comp100264_c0_seq2,comp100264_c0_seq3,comp100264_c0_seq4	1384.32	1330.86	240.01	11.34	7.62
comp1002647_c0	comp1002647_c0_seq1	661	607.55	2	0.21	0.14
comp100265_c0	comp100265_c0_seq1	1175	1121.54	4	0.22	0.15
comp100266_c0	comp100266_c0_seq1,comp100266_c0_seq2	1505	1451.54	58	2.51	1.69
comp100267_c1	comp100267_c1_seq1	625	571.56	9	1	0.67
comp100267_c2	comp100267_c2_seq1	590	536.56	9	1.06	0.71
comp100267_c3	comp100267_c3_seq1,comp100267_c3_seq2,comp100267_c3_seq4,comp100267_c3_seq5	1152.03	1098.58	125.15	7.17	4.82
comp100267_c4	comp100267_c4_seq1	884	830.54	94.03	7.13	4.8
comp100267_c5	comp100267_c5_seq2,comp100267_c5_seq4	816	762.54	16	1.32	0.89
comp100268_c0	comp100268_c0_seq1,comp100268_c0_seq2,comp100268_c0_seq3,comp100268_c0_seq4,comp100268_c0_seq5	1695.26	1641.8	159	6.08	4.09
comp100268_c1	comp100268_c1_seq1	538	484.58	4	0.52	0.35
comp100269_c0	comp100269_c0_seq1,comp100269_c0_seq2,comp100269_c0_seq3,comp100269_c0_seq4,comp100269_c0_seq5	867.99	814.55	40	3.09	2.08
comp100270_c0	comp100270_c0_seq1	2963	2909.54	1299	28	18.82
comp100271_c0	comp100271_c0_seq1,comp100271_c0_seq2,comp100271_c0_seq3,comp100271_c0_seq5	1217.76	1164.3	3206.97	173.25	116.45
comp100271_c1	comp100271_c1_seq1	1529	1475.54	494	21.04	14.14
comp100271_c2	comp100271_c2_seq1	641	587.55	33	3.55	2.39
comp100272_c0	comp100272_c0_seq1,comp100272_c0_seq2,comp100272_c0_seq3,comp100272_c0_seq4	3809.52	3756.06	403.96	6.74	4.53
comp100273_c0	comp100273_c0_seq1	2400	2346.54	15442	412.9	277.53
comp100274_c0	comp100274_c0_seq1	1741	1687.54	24	0.89	0.6
comp100275_c0	comp100275_c0_seq1,comp100275_c0_seq2	933.16	879.7	70	5.01	3.37
comp100275_c1	comp100275_c1_seq1	639	585.56	25	2.7	1.81
comp100275_c2	comp100275_c2_seq1,comp100275_c2_seq2	1952	1898.54	19	0.63	0.42
comp100275_c3	comp100275_c3_seq1,comp100275_c3_seq2,comp100275_c3_seq3,comp100275_c3_seq4	2056.96	2003.5	41	1.28	0.86
comp100275_c4	comp100275_c4_seq1,comp100275_c4_seq2,comp100275_c4_seq3,comp100275_c4_seq4,comp100275_c4_seq5	1456.97	1403.51	28	1.25	0.84
comp100276_c0	comp100276_c0_seq1,comp100276_c0_seq2,comp100276_c0_seq5	1259.94	1206.49	33	1.72	1.16
comp100277_c0	comp100277_c0_seq1,comp100277_c0_seq2,comp100277_c0_seq3,comp100277_c0_seq5	2632.37	2578.91	37495.7	912.05	613.02
comp100278_c0	comp100278_c0_seq1,comp100278_c0_seq2	1130.8	1077.34	22	1.28	0.86
comp100278_c1	comp100278_c1_seq1,comp100278_c1_seq2,comp100278_c1_seq3,comp100278_c1_seq4,comp100278_c1_seq5	1023.32	969.86	65	4.22	2.84
comp100279_c0	comp100279_c0_seq1,comp100279_c0_seq3	557.32	503.89	78	9.8	6.58
comp100280_c0	comp100280_c0_seq1	580	526.57	21	2.52	1.7
comp100280_c1	comp100280_c1_seq1,comp100280_c1_seq2,comp100280_c1_seq3,comp100280_c1_seq4	983.04	929.58	300	20.32	13.66
comp100280_c2	comp100280_c2_seq1,comp100280_c2_seq2,comp100280_c2_seq3,comp100280_c2_seq4,comp100280_c2_seq5	1553.44	1499.98	436.59	18.29	12.29
comp100281_c0	comp100281_c0_seq1,comp100281_c0_seq2,comp100281_c0_seq4,comp100281_c0_seq5	1011.07	957.63	54	3.55	2.39
comp100282_c0	comp100282_c0_seq1,comp100282_c0_seq2,comp100282_c0_seq3	816.7	763.25	25	2.07	1.39
comp100283_c0	comp100283_c0_seq1,comp100283_c0_seq2,comp100283_c0_seq3,comp100283_c0_seq4,comp100283_c0_seq5	2315.72	2262.26	429.06	11.9	8
comp100284_c0	comp100284_c0_seq1,comp100284_c0_seq2,comp100284_c0_seq3,comp100284_c0_seq4,comp100284_c0_seq5	2408.77	2355.31	4723.67	125.83	84.58
comp100285_c0	comp100285_c0_seq1	2216	2162.54	33	0.96	0.64
comp100286_c0	comp100286_c0_seq1	816	762.54	76	6.28	4.22
comp100286_c3	comp100286_c3_seq2,comp100286_c3_seq4	913.44	859.98	137.02	10.04	6.75
comp100287_c0	comp100287_c0_seq1	1034	980.54	4	0.26	0.17
comp100287_c2	comp100287_c2_seq1,comp100287_c2_seq2,comp100287_c2_seq3	1962	1908.54	6	0.2	0.13
comp100287_c3	comp100287_c3_seq1	555	501.57	2	0.25	0.17
comp100287_c4	comp100287_c4_seq1	583	529.56	7	0.84	0.56
comp100288_c0	comp100288_c0_seq1,comp100288_c0_seq2,comp100288_c0_seq3,comp100288_c0_seq4,comp100288_c0_seq5	857.06	803.61	40.35	3.16	2.13
comp100289_c0	comp100289_c0_seq1,comp100289_c0_seq2,comp100289_c0_seq3,comp100289_c0_seq4,comp100289_c0_seq5	1009.04	955.58	24	1.58	1.06
comp10029_c0	comp10029_c0_seq1	565	511.57	2	0.25	0.17
comp100290_c0	comp100290_c0_seq1	510	456.59	7	0.97	0.65
comp100290_c2	comp100290_c2_seq1,comp100290_c2_seq3	1421	1367.54	43	1.98	1.33
comp100290_c3	comp100290_c3_seq1	651	597.55	0	0	0
comp100291_c0	comp100291_c0_seq1,comp100291_c0_seq2	710	656.55	33.01	3.17	2.13
comp100291_c1	comp100291_c1_seq1,comp100291_c1_seq2,comp100291_c1_seq3,comp100291_c1_seq4	1253.38	1199.92	98	5.14	3.45
comp100292_c1	comp100292_c1_seq1,comp100292_c1_seq2,comp100292_c1_seq3,comp100292_c1_seq4,comp100292_c1_seq5	823.89	770.43	40	3.27	2.2
comp100292_c2	comp100292_c2_seq1,comp100292_c2_seq2	1200	1146.54	4	0.22	0.15
comp100292_c3	comp100292_c3_seq1,comp100292_c3_seq2,comp100292_c3_seq3,comp100292_c3_seq4,comp100292_c3_seq5	1314.34	1260.89	72.33	3.61	2.42
comp100293_c0	comp100293_c0_seq1	561	507.57	3	0.37	0.25
comp100293_c1	comp100293_c1_seq1	645	591.55	6	0.64	0.43
comp100293_c2	comp100293_c2_seq1,comp100293_c2_seq2,comp100293_c2_seq3,comp100293_c2_seq4,comp100293_c2_seq5	1624.98	1571.52	900.52	36	24.19
comp100293_c5	comp100293_c5_seq1,comp100293_c5_seq2,comp100293_c5_seq3,comp100293_c5_seq4,comp100293_c5_seq5	787.3	733.86	14	1.2	0.81
comp100293_c6	comp100293_c6_seq1	1152	1098.54	23	1.32	0.89
comp100293_c7	comp100293_c7_seq1,comp100293_c7_seq2	691.32	637.87	54	5.35	3.59
comp100294_c0	comp100294_c0_seq2,comp100294_c0_seq3,comp100294_c0_seq4,comp100294_c0_seq5	3220.04	3166.58	204.8	4.06	2.73
comp100295_c0	comp100295_c0_seq1,comp100295_c0_seq2,comp100295_c0_seq3	2864.56	2811.1	207	4.62	3.1
comp100296_c0	comp100296_c0_seq2	1549	1495.54	12	0.5	0.34
comp100297_c0	comp100297_c0_seq1,comp100297_c0_seq2,comp100297_c0_seq3,comp100297_c0_seq4,comp100297_c0_seq5	870.88	817.43	198	15.27	10.26
comp100298_c0	comp100298_c0_seq1,comp100298_c0_seq2,comp100298_c0_seq3,comp100298_c0_seq5	768.41	714.95	19	1.68	1.13
comp100299_c0	comp100299_c0_seq1	515	461.58	8	1.1	0.74
comp100299_c1	comp100299_c1_seq1	764	710.54	19	1.69	1.13
comp100299_c3	comp100299_c3_seq1,comp100299_c3_seq3,comp100299_c3_seq4,comp100299_c3_seq5	823	769.56	0	0	0
comp100299_c4	comp100299_c4_seq1,comp100299_c4_seq2,comp100299_c4_seq3,comp100299_c4_seq4,comp100299_c4_seq5	1059.72	1006.26	1902	118.98	79.97
comp100300_c0	comp100300_c0_seq1	3494	3440.54	892	16.25	10.93
comp100301_c0	comp100301_c0_seq1,comp100301_c0_seq2,comp100301_c0_seq3,comp100301_c0_seq4,comp100301_c0_seq5	1483.85	1430.39	201.67	8.86	5.96
comp100302_c0	comp100302_c0_seq1	2633	2579.54	1199	29.16	19.6
comp100303_c0	comp100303_c0_seq2,comp100303_c0_seq5	525.1	471.68	6	0.81	0.54
comp100304_c0	comp100304_c0_seq1,comp100304_c0_seq2,comp100304_c0_seq3	1563.67	1510.21	100	4.16	2.8
comp100305_c0	comp100305_c0_seq2,comp100305_c0_seq4,comp100305_c0_seq5	826.78	773.33	47	3.83	2.58
comp100306_c0	comp100306_c0_seq1	1196	1142.54	61	3.36	2.26
comp100307_c0	comp100307_c0_seq1	781	727.54	7	0.61	0.41
comp100308_c0	comp100308_c0_seq1	1121	1067.54	405.16	23.88	16.05
comp100308_c1	comp100308_c1_seq1,comp100308_c1_seq2,comp100308_c1_seq3,comp100308_c1_seq4,comp100308_c1_seq5	1071.41	1017.96	209.92	12.98	8.72
comp100309_c0	comp100309_c0_seq3,comp100309_c0_seq4,comp100309_c0_seq5	1580	1526.54	0	0	0
comp10031_c0	comp10031_c0_seq1	540	486.58	3	0.39	0.26
comp10031_c1	comp10031_c1_seq1	548	494.57	2	0.26	0.17
comp100310_c0	comp100310_c0_seq1	880	826.54	0	0	0
comp100310_c1	comp100310_c1_seq1	940	886.54	24	1.71	1.15
comp100310_c2	comp100310_c2_seq1,comp100310_c2_seq2,comp100310_c2_seq4,comp100310_c2_seq5	4102.16	4048.7	2538.57	39.3	26.41
comp100310_c3	comp100310_c3_seq1	1385	1331.54	66	3.12	2.09
comp100311_c0	comp100311_c0_seq1,comp100311_c0_seq2	2546.71	2493.25	181	4.55	3.06
comp100312_c0	comp100312_c0_seq1	818	764.54	0	0	0
comp100312_c1	comp100312_c1_seq1,comp100312_c1_seq2,comp100312_c1_seq3,comp100312_c1_seq4,comp100312_c1_seq5	2790.43	2736.97	128.68	2.95	1.98
comp100313_c0	comp100313_c0_seq2,comp100313_c0_seq3	931.67	878.21	75	5.38	3.62
comp100313_c1	comp100313_c1_seq1	1327	1273.54	35	1.73	1.16
comp100313_c2	comp100313_c2_seq1,comp100313_c2_seq2,comp100313_c2_seq5	916.02	862.56	11	0.8	0.54
comp100314_c0	comp100314_c0_seq1	900	846.54	25.85	1.92	1.29
comp1003142_c0	comp1003142_c0_seq1	566	512.57	2	0.25	0.17
comp100315_c0	comp100315_c0_seq1,comp100315_c0_seq2	1127	1073.54	6	0.35	0.24
comp100317_c0	comp100317_c0_seq1,comp100317_c0_seq2,comp100317_c0_seq3	2890.98	2837.52	213.95	4.73	3.18
comp100318_c0	comp100318_c0_seq1	1059	1005.54	43	2.69	1.81
comp100319_c0	comp100319_c0_seq1	954	900.54	3	0.21	0.14
comp100319_c1	comp100319_c1_seq1,comp100319_c1_seq2,comp100319_c1_seq3,comp100319_c1_seq4,comp100319_c1_seq5	2567.06	2513.6	397	9.91	6.66
comp100319_c2	comp100319_c2_seq3,comp100319_c2_seq4	1216	1162.54	135	7.3	4.91
comp100319_c3	comp100319_c3_seq1	1751	1697.54	12	0.44	0.3
comp100320_c0	comp100320_c0_seq2,comp100320_c0_seq3	808	754.54	44	3.68	2.47
comp100320_c1	comp100320_c1_seq1,comp100320_c1_seq2,comp100320_c1_seq4	767.88	714.43	7	0.62	0.42
comp100320_c2	comp100320_c2_seq1	607	553.56	10	1.14	0.77
comp100320_c3	comp100320_c3_seq1	942	888.54	5	0.35	0.24
comp100321_c0	comp100321_c0_seq1,comp100321_c0_seq2,comp100321_c0_seq3,comp100321_c0_seq4	802.44	748.99	33.01	2.78	1.87
comp100322_c0	comp100322_c0_seq2,comp100322_c0_seq3	1513.06	1459.6	198.58	8.55	5.75
comp100322_c1	comp100322_c1_seq1,comp100322_c1_seq2,comp100322_c1_seq3,comp100322_c1_seq4	2185.14	2131.68	586.33	17.26	11.6
comp100322_c2	comp100322_c2_seq1	611	557.56	5	0.57	0.38
comp100322_c3	comp100322_c3_seq1	836	782.54	59.18	4.77	3.2
comp100323_c0	comp100323_c0_seq1,comp100323_c0_seq2,comp100323_c0_seq3,comp100323_c0_seq5	949.33	895.88	54	3.8	2.55
comp100323_c1	comp100323_c1_seq1,comp100323_c1_seq3	800.17	746.72	22	1.86	1.25
comp100324_c0	comp100324_c0_seq1,comp100324_c0_seq2,comp100324_c0_seq3,comp100324_c0_seq4	1416	1362.54	335.29	15.47	10.4
comp100324_c1	comp100324_c1_seq1	1794	1740.54	13	0.47	0.32
comp100325_c0	comp100325_c0_seq1,comp100325_c0_seq2	3873.52	3820.06	5116.97	83.96	56.44
comp100326_c0	comp100326_c0_seq1,comp100326_c0_seq2,comp100326_c0_seq3,comp100326_c0_seq4	1150.36	1096.9	340	19.5	13.11
comp100327_c1	comp100327_c1_seq3,comp100327_c1_seq4,comp100327_c1_seq5	765.47	712.01	65	5.76	3.87
comp100327_c2	comp100327_c2_seq1,comp100327_c2_seq2	506	452.59	9	1.26	0.85
comp100328_c0	comp100328_c0_seq1	514	460.58	8	1.1	0.74
comp100328_c1	comp100328_c1_seq1,comp100328_c1_seq3,comp100328_c1_seq4,comp100328_c1_seq5	1166.15	1112.69	258.63	14.62	9.83
comp100328_c2	comp100328_c2_seq1	1425	1371.54	10	0.46	0.31
comp100329_c0	comp100329_c0_seq1,comp100329_c0_seq2	547	493.57	0	0	0
comp100329_c1	comp100329_c1_seq2,comp100329_c1_seq3,comp100329_c1_seq5	774.82	721.37	27	2.36	1.59
comp100329_c2	comp100329_c2_seq1	512	458.58	27	3.73	2.51
comp100330_c0	comp100330_c0_seq1,comp100330_c0_seq2,comp100330_c0_seq3,comp100330_c0_seq4,comp100330_c0_seq5	834.33	780.9	32.14	2.59	1.74
comp100331_c1	comp100331_c1_seq3	510	456.59	1	0.14	0.09
comp100331_c3	comp100331_c3_seq1	532	478.58	5	0.66	0.44
comp100331_c4	comp100331_c4_seq1	942	888.54	10	0.71	0.48
comp100331_c5	comp100331_c5_seq1	756	702.54	2	0.18	0.12
comp100331_c6	comp100331_c6_seq1	898	844.54	16	1.19	0.8
comp100331_c7	comp100331_c7_seq1	652	598.55	2	0.21	0.14
comp100331_c8	comp100331_c8_seq2,comp100331_c8_seq3,comp100331_c8_seq4,comp100331_c8_seq5	1451.17	1397.71	43.78	1.97	1.32
comp100331_c9	comp100331_c9_seq1,comp100331_c9_seq3	1713.64	1660.18	44	1.66	1.12
comp100332_c0	comp100332_c0_seq1,comp100332_c0_seq2,comp100332_c0_seq3,comp100332_c0_seq4,comp100332_c0_seq5	1806.32	1752.86	162.98	5.84	3.92
comp100333_c0	comp100333_c0_seq1,comp100333_c0_seq2,comp100333_c0_seq3,comp100333_c0_seq4	672.53	619.09	13	1.33	0.89
comp1003338_c0	comp1003338_c0_seq1	753	699.54	2	0.18	0.12
comp100334_c1	comp100334_c1_seq1	549	495.57	0	0	0
comp100334_c3	comp100334_c3_seq1	1107	1053.54	125	7.47	5.02
comp100334_c4	comp100334_c4_seq2,comp100334_c4_seq3,comp100334_c4_seq5	2426.41	2372.95	55	1.45	0.98
comp100335_c0	comp100335_c0_seq1,comp100335_c0_seq2	2334	2280.54	20.89	0.57	0.39
comp100335_c1	comp100335_c1_seq1	875	821.54	46	3.53	2.37
comp100335_c2	comp100335_c2_seq1,comp100335_c2_seq2,comp100335_c2_seq3,comp100335_c2_seq4,comp100335_c2_seq5	2391.55	2338.09	2491.37	66.86	44.94
comp100335_c3	comp100335_c3_seq1,comp100335_c3_seq2	625.18	571.76	9	0.99	0.67
comp100335_c5	comp100335_c5_seq1,comp100335_c5_seq2,comp100335_c5_seq3	2205.77	2152.31	25	0.73	0.49
comp100335_c6	comp100335_c6_seq1	2271	2217.54	77	2.18	1.46
comp100335_c7	comp100335_c7_seq1	1221	1167.54	31	1.67	1.12
comp100335_c8	comp100335_c8_seq1	573	519.57	3	0.37	0.25
comp100335_c9	comp100335_c9_seq1	1510	1456.54	10	0.43	0.29
comp100336_c0	comp100336_c0_seq1	1377	1323.54	29	1.38	0.93
comp100337_c1	comp100337_c1_seq1,comp100337_c1_seq2,comp100337_c1_seq3,comp100337_c1_seq4	3338.7	3285.24	1458.98	27.84	18.72
comp100338_c0	comp100338_c0_seq1	3006	2952.54	965.68	20.51	13.79
comp100339_c0	comp100339_c0_seq1,comp100339_c0_seq2	4069.03	4015.57	840.01	13.11	8.81
comp100340_c0	comp100340_c0_seq1	590	536.56	7	0.83	0.55
comp100340_c1	comp100340_c1_seq1,comp100340_c1_seq2,comp100340_c1_seq3,comp100340_c1_seq4,comp100340_c1_seq5	3670.66	3617.2	56	0.97	0.65
comp100341_c0	comp100341_c0_seq1	1034	980.54	90	5.78	3.88
comp100341_c1	comp100341_c1_seq1,comp100341_c1_seq2	1789	1735.54	187	6.77	4.55
comp100342_c0	comp100342_c0_seq1,comp100342_c0_seq2	2191.7	2138.24	108	3.17	2.13
comp100343_c1	comp100343_c1_seq1	2683	2629.54	14	0.33	0.22
comp100344_c1	comp100344_c1_seq1,comp100344_c1_seq2,comp100344_c1_seq3,comp100344_c1_seq4,comp100344_c1_seq5	1322.09	1268.63	84	4.16	2.8
comp100345_c0	comp100345_c0_seq2,comp100345_c0_seq3,comp100345_c0_seq4,comp100345_c0_seq5	2031.35	1977.89	110	3.49	2.35
comp100345_c1	comp100345_c1_seq1	1562	1508.54	90	3.75	2.52
comp100346_c0	comp100346_c0_seq4	602	548.56	10	1.15	0.77
comp100347_c0	comp100347_c0_seq1,comp100347_c0_seq2	2362.74	2309.28	1352.16	36.74	24.69
comp100348_c0	comp100348_c0_seq1,comp100348_c0_seq2,comp100348_c0_seq3,comp100348_c0_seq4	2575.26	2521.81	137	3.41	2.29
comp100349_c0	comp100349_c0_seq1	1946	1892.54	12	0.4	0.27
comp100350_c0	comp100350_c0_seq1,comp100350_c0_seq2,comp100350_c0_seq3,comp100350_c0_seq4,comp100350_c0_seq5	3294.83	3241.37	90.02	1.74	1.17
comp100350_c2	comp100350_c2_seq1,comp100350_c2_seq2	2725.45	2671.99	2075.03	48.71	32.74
comp100350_c4	comp100350_c4_seq1,comp100350_c4_seq2,comp100350_c4_seq3,comp100350_c4_seq4,comp100350_c4_seq5	1238.54	1185.08	408	21.65	14.55
comp100351_c0	comp100351_c0_seq1,comp100351_c0_seq2,comp100351_c0_seq3,comp100351_c0_seq4	3056.5	3003.04	2731.94	57.05	38.34
comp100352_c2	comp100352_c2_seq1	870	816.54	5	0.39	0.26
comp100352_c3	comp100352_c3_seq1,comp100352_c3_seq2,comp100352_c3_seq3,comp100352_c3_seq4,comp100352_c3_seq5	892.72	839.26	68	5.11	3.43
comp100352_c4	comp100352_c4_seq1,comp100352_c4_seq2,comp100352_c4_seq5	684.54	631.1	20	2	1.34
comp100353_c0	comp100353_c0_seq1,comp100353_c0_seq2,comp100353_c0_seq3,comp100353_c0_seq4,comp100353_c0_seq5	612.23	558.79	107.93	12.21	8.21
comp100354_c0	comp100354_c0_seq2,comp100354_c0_seq3,comp100354_c0_seq4,comp100354_c0_seq5	767.23	713.77	43	3.8	2.55
comp100355_c0	comp100355_c0_seq1,comp100355_c0_seq2	1597.35	1543.89	121.94	4.96	3.34
comp100356_c3	comp100356_c3_seq1	690	636.55	3	0.3	0.2
comp100356_c4	comp100356_c4_seq1	707	653.55	7	0.68	0.45
comp100356_c5	comp100356_c5_seq1,comp100356_c5_seq2,comp100356_c5_seq3,comp100356_c5_seq4	4776	4722.54	152.02	2.02	1.36
comp100357_c1	comp100357_c1_seq1,comp100357_c1_seq2,comp100357_c1_seq3,comp100357_c1_seq4,comp100357_c1_seq5	850.2	796.74	59	4.67	3.14
comp100358_c0	comp100358_c0_seq1,comp100358_c0_seq2,comp100358_c0_seq3,comp100358_c0_seq4,comp100358_c0_seq5	644.44	590.99	19	2.03	1.37
comp100358_c1	comp100358_c1_seq1,comp100358_c1_seq2,comp100358_c1_seq3,comp100358_c1_seq4,comp100358_c1_seq5	995.08	941.63	106	7.09	4.76
comp100358_c2	comp100358_c2_seq1	1340	1286.54	45	2.2	1.48
comp100358_c5	comp100358_c5_seq1	545	491.57	0	0	0
comp100359_c0	comp100359_c0_seq1,comp100359_c0_seq2,comp100359_c0_seq3,comp100359_c0_seq4,comp100359_c0_seq5	736.63	683.18	42	3.88	2.61
comp100360_c0	comp100360_c0_seq1,comp100360_c0_seq2,comp100360_c0_seq3,comp100360_c0_seq4,comp100360_c0_seq5	1398.83	1345.37	45	2.1	1.41
comp100360_c1	comp100360_c1_seq3,comp100360_c1_seq4,comp100360_c1_seq5	719.79	666.34	28	2.65	1.78
comp100361_c0	comp100361_c0_seq1,comp100361_c0_seq2,comp100361_c0_seq3,comp100361_c0_seq4,comp100361_c0_seq5	1543.4	1489.94	234	9.87	6.63
comp100361_c7	comp100361_c7_seq1,comp100361_c7_seq2	588	534.56	5	0.59	0.4
comp100362_c0	comp100362_c0_seq1	640	586.56	462.1	49.78	33.46
comp100362_c1	comp100362_c1_seq2,comp100362_c1_seq3,comp100362_c1_seq4,comp100362_c1_seq5	1160.15	1106.7	13.01	0.74	0.5
comp100362_c3	comp100362_c3_seq1	935	881.54	686.92	49.09	32.99
comp100363_c0	comp100363_c0_seq1	1502	1448.54	58	2.52	1.69
comp100363_c1	comp100363_c1_seq1,comp100363_c1_seq2,comp100363_c1_seq3	3141	3087.54	135	2.74	1.84
comp100363_c2	comp100363_c2_seq1,comp100363_c2_seq2,comp100363_c2_seq3	848.81	795.35	13.91	1.1	0.74
comp100363_c3	comp100363_c3_seq1	1148	1094.54	1	0.06	0.04
comp100364_c0	comp100364_c0_seq1,comp100364_c0_seq2	1553.85	1500.4	778.32	32.59	21.91
comp100364_c1	comp100364_c1_seq1	2275	2221.54	1180.28	33.34	22.41
comp100365_c0	comp100365_c0_seq1,comp100365_c0_seq2	3771.5	3718.04	969.01	16.34	10.98
comp100366_c0	comp100366_c0_seq1,comp100366_c0_seq2,comp100366_c0_seq3,comp100366_c0_seq4,comp100366_c0_seq5	1405	1351.54	2	0.09	0.06
comp100366_c2	comp100366_c2_seq1	547	493.57	36	4.62	3.1
comp100367_c0	comp100367_c0_seq1,comp100367_c0_seq2	710	656.55	4	0.38	0.26
comp100367_c3	comp100367_c3_seq1,comp100367_c3_seq2,comp100367_c3_seq3,comp100367_c3_seq4,comp100367_c3_seq5	3394.73	3341.27	983	18.45	12.4
comp100368_c0	comp100368_c0_seq1,comp100368_c0_seq2	1671.69	1618.23	406	15.76	10.59
comp100369_c0	comp100369_c0_seq1	2205	2151.54	106	3.09	2.08
comp100370_c0	comp100370_c0_seq1,comp100370_c0_seq2,comp100370_c0_seq3,comp100370_c0_seq4,comp100370_c0_seq5	2345.57	2292.11	201.91	5.53	3.72
comp100371_c0	comp100371_c0_seq1,comp100371_c0_seq2,comp100371_c0_seq3,comp100371_c0_seq4,comp100371_c0_seq5	1737.24	1683.78	170	6.34	4.26
comp100372_c1	comp100372_c1_seq2,comp100372_c1_seq3,comp100372_c1_seq4	1027.79	974.35	114.51	7.4	4.97
comp100373_c0	comp100373_c0_seq1	738	684.55	49	4.52	3.04
comp100373_c1	comp100373_c1_seq1,comp100373_c1_seq2,comp100373_c1_seq3,comp100373_c1_seq4,comp100373_c1_seq5	897.58	844.12	61	4.55	3.06
comp100373_c3	comp100373_c3_seq1,comp100373_c3_seq2,comp100373_c3_seq3,comp100373_c3_seq4	810.9	757.44	31	2.58	1.73
comp100374_c2	comp100374_c2_seq1,comp100374_c2_seq2,comp100374_c2_seq3,comp100374_c2_seq4,comp100374_c2_seq5	1151.1	1097.64	48	2.75	1.85
comp100374_c5	comp100374_c5_seq1,comp100374_c5_seq3,comp100374_c5_seq4,comp100374_c5_seq5	901.98	848.54	60	4.46	2.99
comp100374_c7	comp100374_c7_seq1,comp100374_c7_seq2,comp100374_c7_seq3	740	686.55	2	0.18	0.12
comp100375_c1	comp100375_c1_seq2,comp100375_c1_seq4	1251.65	1198.19	34	1.78	1.2
comp100376_c0	comp100376_c0_seq1,comp100376_c0_seq2,comp100376_c0_seq3,comp100376_c0_seq4,comp100376_c0_seq5	2137.64	2084.18	184.25	5.55	3.73
comp100377_c0	comp100377_c0_seq1	2300	2246.54	21	0.59	0.39
comp100378_c0	comp100378_c0_seq1,comp100378_c0_seq2,comp100378_c0_seq3,comp100378_c0_seq4,comp100378_c0_seq5	1808.13	1754.67	397.45	14.22	9.56
comp100379_c0	comp100379_c0_seq1	1762	1708.54	24	0.88	0.59
comp10038_c0	comp10038_c0_seq1	666	612.55	3	0.31	0.21
comp100380_c0	comp100380_c0_seq1,comp100380_c0_seq3,comp100380_c0_seq4	779.44	725.99	2	0.17	0.12
comp100381_c2	comp100381_c2_seq1	690	636.55	185.54	18.4	12.37
comp100381_c3	comp100381_c3_seq1,comp100381_c3_seq3,comp100381_c3_seq4	1180.09	1126.64	100	5.58	3.75
comp100381_c4	comp100381_c4_seq1,comp100381_c4_seq2,comp100381_c4_seq3,comp100381_c4_seq4,comp100381_c4_seq5	2074.98	2021.52	4	0.12	0.08
comp100382_c0	comp100382_c0_seq2	679	625.55	0	0	0
comp100382_c1	comp100382_c1_seq1	689	635.55	0	0	0
comp100382_c2	comp100382_c2_seq3,comp100382_c2_seq4	976	922.54	1	0.07	0.05
comp100383_c0	comp100383_c0_seq1	3985	3931.54	24	0.38	0.26
comp100384_c0	comp100384_c0_seq2,comp100384_c0_seq3	2219.66	2166.2	1898.99	55.02	36.98
comp100385_c0	comp100385_c0_seq1	1459	1405.54	126	5.63	3.79
comp100386_c0	comp100386_c0_seq1,comp100386_c0_seq3,comp100386_c0_seq4,comp100386_c0_seq5	779	725.54	9	0.78	0.53
comp100386_c1	comp100386_c1_seq1	634	580.56	7	0.76	0.51
comp100386_c2	comp100386_c2_seq1	585	531.56	4	0.48	0.32
comp100386_c3	comp100386_c3_seq1,comp100386_c3_seq2,comp100386_c3_seq3,comp100386_c3_seq4,comp100386_c3_seq5	905.31	851.85	51	3.77	2.54
comp100387_c0	comp100387_c0_seq2,comp100387_c0_seq3	1360.77	1307.31	46	2.21	1.49
comp100387_c2	comp100387_c2_seq1,comp100387_c2_seq3,comp100387_c2_seq4,comp100387_c2_seq5	671.6	618.16	28	2.86	1.92
comp100388_c0	comp100388_c0_seq2,comp100388_c0_seq5	1288.71	1235.25	79.03	4.02	2.7
comp100389_c1	comp100389_c1_seq1,comp100389_c1_seq3,comp100389_c1_seq4,comp100389_c1_seq5	1782.97	1729.51	871.98	31.66	21.28
comp100389_c2	comp100389_c2_seq1	621	567.56	4	0.45	0.3
comp10039_c0	comp10039_c0_seq1	545	491.57	1	0.13	0.09
comp100390_c0	comp100390_c0_seq1,comp100390_c0_seq2,comp100390_c0_seq3,comp100390_c0_seq4,comp100390_c0_seq5	1557.28	1503.82	83	3.47	2.33
comp100390_c1	comp100390_c1_seq1,comp100390_c1_seq2	793	739.54	6	0.51	0.34
comp100390_c2	comp100390_c2_seq1	1244	1190.54	4	0.21	0.14
comp100390_c3	comp100390_c3_seq1	1198	1144.54	2	0.11	0.07
comp100390_c4	comp100390_c4_seq1	546	492.57	1	0.13	0.09
comp100391_c0	comp100391_c0_seq1,comp100391_c0_seq2,comp100391_c0_seq3,comp100391_c0_seq4,comp100391_c0_seq5	858.35	804.9	47	3.68	2.47
comp100391_c1	comp100391_c1_seq1,comp100391_c1_seq2,comp100391_c1_seq3,comp100391_c1_seq4	508.96	455.54	25	3.48	2.34
comp100391_c2	comp100391_c2_seq1,comp100391_c2_seq2	681	627.55	5	0.5	0.34
comp100392_c0	comp100392_c0_seq1,comp100392_c0_seq2,comp100392_c0_seq3,comp100392_c0_seq4	2930.47	2877.01	801	17.46	11.74
comp100393_c0	comp100393_c0_seq1,comp100393_c0_seq2,comp100393_c0_seq3,comp100393_c0_seq4,comp100393_c0_seq5	1915.46	1862	40	1.35	0.91
comp100394_c0	comp100394_c0_seq1,comp100394_c0_seq2,comp100394_c0_seq3,comp100394_c0_seq4,comp100394_c0_seq5	1633.07	1579.61	171	6.8	4.57
comp100395_c1	comp100395_c1_seq1,comp100395_c1_seq2,comp100395_c1_seq3,comp100395_c1_seq4,comp100395_c1_seq5	981.8	928.34	699	47.42	31.87
comp100396_c0	comp100396_c0_seq1	2267	2213.54	930	26.37	17.72
comp100397_c0	comp100397_c0_seq1,comp100397_c0_seq2,comp100397_c0_seq3,comp100397_c0_seq4,comp100397_c0_seq5	758.88	705.42	22	1.97	1.32
comp100398_c0	comp100398_c0_seq1	2983	2929.54	9651.94	206.62	138.88
comp100399_c0	comp100399_c0_seq1,comp100399_c0_seq2,comp100399_c0_seq3,comp100399_c0_seq4,comp100399_c0_seq5	1914.22	1860.76	697.95	23.55	15.83
comp100400_c0	comp100400_c0_seq1	594	540.56	8	0.94	0.63
comp100400_c1	comp100400_c1_seq1,comp100400_c1_seq2,comp100400_c1_seq3,comp100400_c1_seq4	884.93	831.47	11	0.83	0.56
comp100401_c0	comp100401_c0_seq1,comp100401_c0_seq2,comp100401_c0_seq3,comp100401_c0_seq4,comp100401_c0_seq5	2086.45	2032.99	82	2.53	1.7
comp100402_c0	comp100402_c0_seq1,comp100402_c0_seq2	1963.91	1910.47	78	2.56	1.72
comp100403_c0	comp100403_c0_seq1,comp100403_c0_seq3,comp100403_c0_seq4,comp100403_c0_seq5	678.75	625.32	19	1.92	1.29
comp100404_c0	comp100404_c0_seq3,comp100404_c0_seq4,comp100404_c0_seq5	1394.97	1341.51	8563.65	401.27	269.71
comp100404_c1	comp100404_c1_seq2,comp100404_c1_seq3,comp100404_c1_seq4	2565.67	2512.21	47	1.17	0.79
comp100405_c2	comp100405_c2_seq1,comp100405_c2_seq3,comp100405_c2_seq4,comp100405_c2_seq5	1375.45	1321.99	14	0.67	0.45
comp100406_c0	comp100406_c0_seq1,comp100406_c0_seq2,comp100406_c0_seq3,comp100406_c0_seq4,comp100406_c0_seq5	1964.76	1911.3	1476.87	48.51	32.61
comp100407_c0	comp100407_c0_seq1,comp100407_c0_seq2	2027	1973.54	132	4.2	2.82
comp100408_c0	comp100408_c0_seq1,comp100408_c0_seq2,comp100408_c0_seq3,comp100408_c0_seq4,comp100408_c0_seq5	4099.96	4046.5	524.18	8.12	5.46
comp100408_c1	comp100408_c1_seq1,comp100408_c1_seq2,comp100408_c1_seq3	1357.5	1304.04	471.02	22.71	15.26
comp100408_c2	comp100408_c2_seq1,comp100408_c2_seq2	931.89	878.43	27	1.94	1.3
comp100409_c1	comp100409_c1_seq1,comp100409_c1_seq2,comp100409_c1_seq3,comp100409_c1_seq4,comp100409_c1_seq5	1656.75	1603.3	754.5	29.56	19.87
comp100410_c0	comp100410_c0_seq1,comp100410_c0_seq2	2015	1961.54	13	0.42	0.28
comp100411_c0	comp100411_c0_seq1,comp100411_c0_seq3,comp100411_c0_seq4,comp100411_c0_seq5	4076.94	4023.49	950.15	14.8	9.95
comp100412_c0	comp100412_c0_seq1	3147	3093.54	150	3.04	2.04
comp100413_c0	comp100413_c0_seq1,comp100413_c0_seq2,comp100413_c0_seq3,comp100413_c0_seq4,comp100413_c0_seq5	1820.1	1766.65	190.61	6.78	4.55
comp100414_c0	comp100414_c0_seq1,comp100414_c0_seq2,comp100414_c0_seq3,comp100414_c0_seq4	1424.16	1370.7	271.06	12.43	8.35
comp100414_c1	comp100414_c1_seq1	961	907.54	23	1.6	1.07
comp100414_c2	comp100414_c2_seq1	1019	965.54	36	2.35	1.58
comp100415_c0	comp100415_c0_seq2	853	799.54	60	4.73	3.18
comp100415_c1	comp100415_c1_seq1,comp100415_c1_seq2,comp100415_c1_seq3,comp100415_c1_seq4,comp100415_c1_seq5	2327.31	2273.86	111	3.06	2.06
comp100415_c2	comp100415_c2_seq1	672	618.55	78	7.96	5.35
comp100415_c3	comp100415_c3_seq1	1327	1273.54	70	3.46	2.32
comp100416_c0	comp100416_c0_seq1,comp100416_c0_seq2,comp100416_c0_seq3,comp100416_c0_seq4,comp100416_c0_seq5	1248.13	1194.67	30	1.58	1.06
comp100416_c1	comp100416_c1_seq1,comp100416_c1_seq2	1181	1127.54	9	0.5	0.34
comp100416_c4	comp100416_c4_seq1	597	543.56	1	0.12	0.08
comp100416_c5	comp100416_c5_seq1,comp100416_c5_seq2,comp100416_c5_seq3,comp100416_c5_seq4,comp100416_c5_seq5	654.08	600.64	18	1.89	1.27
comp100417_c2	comp100417_c2_seq1,comp100417_c2_seq2,comp100417_c2_seq3,comp100417_c2_seq4	1574.35	1520.89	31	1.28	0.86
comp100418_c0	comp100418_c0_seq1,comp100418_c0_seq2,comp100418_c0_seq3,comp100418_c0_seq4,comp100418_c0_seq5	3350.96	3297.5	8772.71	166.81	112.12
comp100419_c0	comp100419_c0_seq1,comp100419_c0_seq2,comp100419_c0_seq3	1751.58	1698.12	378.98	14.02	9.42
comp100420_c0	comp100420_c0_seq1,comp100420_c0_seq2,comp100420_c0_seq3	2861.99	2808.53	981.56	21.92	14.73
comp100421_c0	comp100421_c0_seq1	2120	2066.54	48	1.46	0.98
comp100422_c0	comp100422_c0_seq1,comp100422_c0_seq2,comp100422_c0_seq3,comp100422_c0_seq4,comp100422_c0_seq5	1149.9	1096.44	115.08	6.6	4.44
comp100423_c0	comp100423_c0_seq1,comp100423_c0_seq2,comp100423_c0_seq3,comp100423_c0_seq4	1338.62	1285.16	30	1.47	0.99
comp100424_c0	comp100424_c0_seq1,comp100424_c0_seq2	1878	1824.54	20	0.69	0.46
comp100425_c0	comp100425_c0_seq1	2785	2731.54	101	2.32	1.56
comp100426_c0	comp100426_c0_seq1	2381	2327.54	12121.6	326.77	219.64
comp100427_c0	comp100427_c0_seq1,comp100427_c0_seq2,comp100427_c0_seq3	756.86	703.42	24	2.15	1.45
comp100427_c4	comp100427_c4_seq1,comp100427_c4_seq2,comp100427_c4_seq3,comp100427_c4_seq4,comp100427_c4_seq5	854.25	800.8	83	6.53	4.39
comp100428_c0	comp100428_c0_seq1,comp100428_c0_seq2,comp100428_c0_seq3,comp100428_c0_seq4,comp100428_c0_seq5	1311.98	1258.52	272.04	13.59	9.13
comp100429_c0	comp100429_c0_seq1,comp100429_c0_seq2,comp100429_c0_seq3,comp100429_c0_seq4,comp100429_c0_seq5	1183.8	1130.35	485.34	27.01	18.15
comp100430_c0	comp100430_c0_seq1,comp100430_c0_seq3,comp100430_c0_seq4	870.78	817.32	30.02	2.31	1.56
comp100431_c0	comp100431_c0_seq1,comp100431_c0_seq2,comp100431_c0_seq3,comp100431_c0_seq4,comp100431_c0_seq5	1537.85	1484.39	68.42	2.9	1.95
comp100432_c0	comp100432_c0_seq1	1942	1888.54	6685.38	222.25	149.38
comp100433_c0	comp100433_c0_seq1,comp100433_c0_seq2,comp100433_c0_seq3,comp100433_c0_seq4,comp100433_c0_seq5	1535.91	1482.45	254.62	10.79	7.25
comp100434_c4	comp100434_c4_seq1	610	556.56	4	0.45	0.31
comp100434_c5	comp100434_c5_seq1,comp100434_c5_seq3,comp100434_c5_seq4,comp100434_c5_seq5	1171.98	1118.52	50	2.81	1.89
comp100434_c6	comp100434_c6_seq1,comp100434_c6_seq2,comp100434_c6_seq3,comp100434_c6_seq4	1009.26	955.8	41	2.7	1.82
comp100434_c8	comp100434_c8_seq1,comp100434_c8_seq2	1159.04	1105.58	17	0.97	0.65
comp100434_c9	comp100434_c9_seq1	757	703.54	37	3.32	2.23
comp100435_c0	comp100435_c0_seq1,comp100435_c0_seq2,comp100435_c0_seq3,comp100435_c0_seq4,comp100435_c0_seq5	2903.57	2850.11	863.98	19.01	12.78
comp100436_c0	comp100436_c0_seq1,comp100436_c0_seq2,comp100436_c0_seq3,comp100436_c0_seq4,comp100436_c0_seq5	940.72	887.26	65	4.61	3.1
comp100436_c1	comp100436_c1_seq1	590	536.56	6	0.71	0.48
comp100436_c2	comp100436_c2_seq1,comp100436_c2_seq2,comp100436_c2_seq3,comp100436_c2_seq4,comp100436_c2_seq5	1332.12	1278.66	23	1.13	0.76
comp100437_c0	comp100437_c0_seq1,comp100437_c0_seq2,comp100437_c0_seq3,comp100437_c0_seq4	1321	1267.54	13	0.64	0.43
comp100437_c1	comp100437_c1_seq1	608	554.56	1	0.11	0.08
comp100438_c0	comp100438_c0_seq1	723	669.55	5	0.47	0.32
comp100438_c1	comp100438_c1_seq1,comp100438_c1_seq2,comp100438_c1_seq3,comp100438_c1_seq4,comp100438_c1_seq5	1931.13	1877.67	1141.12	38.16	25.65
comp100438_c2	comp100438_c2_seq1	544	490.57	6	0.77	0.52
comp100439_c1	comp100439_c1_seq1,comp100439_c1_seq2,comp100439_c1_seq3,comp100439_c1_seq4,comp100439_c1_seq5	1707.02	1653.56	910	34.57	23.23
comp100440_c0	comp100440_c0_seq1,comp100440_c0_seq2,comp100440_c0_seq3,comp100440_c0_seq4	3026.01	2972.55	13226	279.03	187.54
comp100441_c0	comp100441_c0_seq1,comp100441_c0_seq2,comp100441_c0_seq3,comp100441_c0_seq4,comp100441_c0_seq5	2537.98	2484.52	582	14.7	9.88
comp100442_c0	comp100442_c0_seq1,comp100442_c0_seq2,comp100442_c0_seq3,comp100442_c0_seq4,comp100442_c0_seq5	2416.34	2362.88	335.14	8.9	5.98
comp100443_c1	comp100443_c1_seq1,comp100443_c1_seq2,comp100443_c1_seq3,comp100443_c1_seq4,comp100443_c1_seq5	1576.15	1522.7	451.03	18.61	12.51
comp100444_c0	comp100444_c0_seq1,comp100444_c0_seq2,comp100444_c0_seq3,comp100444_c0_seq4,comp100444_c0_seq5	1185.53	1132.09	197	10.95	7.36
comp100445_c0	comp100445_c0_seq1	1391	1337.54	16	0.75	0.51
comp100446_c0	comp100446_c0_seq1,comp100446_c0_seq2	1225.87	1172.41	56	3	2.02
comp100447_c0	comp100447_c0_seq1,comp100447_c0_seq2	1034.26	980.81	37	2.37	1.6
comp100447_c1	comp100447_c1_seq1,comp100447_c1_seq2,comp100447_c1_seq3,comp100447_c1_seq4,comp100447_c1_seq5	1619.81	1566.36	64	2.57	1.73
comp100447_c3	comp100447_c3_seq1	691	637.55	18	1.78	1.2
comp100448_c0	comp100448_c0_seq1,comp100448_c0_seq2	585.83	532.39	9	1.07	0.72
comp100449_c0	comp100449_c0_seq1,comp100449_c0_seq2,comp100449_c0_seq3,comp100449_c0_seq4,comp100449_c0_seq5	2543	2489.54	3	0.08	0.05
comp1004493_c0	comp1004493_c0_seq1	510	456.59	5	0.69	0.47
comp10045_c0	comp10045_c0_seq1	529	475.58	2	0.27	0.18
comp100450_c0	comp100450_c0_seq1,comp100450_c0_seq2,comp100450_c0_seq3,comp100450_c0_seq4,comp100450_c0_seq5	1041.17	987.71	296	18.87	12.68
comp100451_c0	comp100451_c0_seq1,comp100451_c0_seq3,comp100451_c0_seq5	3138.32	3084.86	1030.18	20.94	14.08
comp100452_c0	comp100452_c0_seq1,comp100452_c0_seq2,comp100452_c0_seq3,comp100452_c0_seq4,comp100452_c0_seq5	2436.5	2383.04	313.97	8.27	5.56
comp1004524_c0	comp1004524_c0_seq1	597	543.56	1	0.12	0.08
comp100453_c0	comp100453_c0_seq1	972	918.54	48	3.29	2.21
comp100453_c1	comp100453_c1_seq1,comp100453_c1_seq2,comp100453_c1_seq3,comp100453_c1_seq4,comp100453_c1_seq5	2217.24	2163.79	1500.46	43.52	29.25
comp100454_c0	comp100454_c0_seq1,comp100454_c0_seq2,comp100454_c0_seq3,comp100454_c0_seq4,comp100454_c0_seq5	2831.64	2778.18	111	2.51	1.68
comp100454_c1	comp100454_c1_seq2,comp100454_c1_seq3,comp100454_c1_seq4,comp100454_c1_seq5	854.13	800.68	453.64	35.71	24
comp100454_c2	comp100454_c2_seq1	1148	1094.54	3	0.17	0.12
comp100455_c0	comp100455_c0_seq1,comp100455_c0_seq3,comp100455_c0_seq4,comp100455_c0_seq5	1696.3	1642.84	1236.91	47.29	31.79
comp100456_c0	comp100456_c0_seq1,comp100456_c0_seq2	875.58	822.14	36	2.76	1.85
comp100457_c0	comp100457_c0_seq1	1360	1306.54	48	2.31	1.55
comp100457_c1	comp100457_c1_seq1,comp100457_c1_seq2,comp100457_c1_seq3,comp100457_c1_seq4,comp100457_c1_seq5	1205.15	1151.69	240.95	13.16	8.85
comp100457_c3	comp100457_c3_seq1,comp100457_c3_seq2,comp100457_c3_seq4	1603.75	1550.29	1253.58	50.8	34.14
comp100458_c0	comp100458_c0_seq1,comp100458_c0_seq2	1146.43	1092.97	18	1.04	0.7
comp100459_c0	comp100459_c0_seq1,comp100459_c0_seq2,comp100459_c0_seq3,comp100459_c0_seq4,comp100459_c0_seq5	1945.3	1891.84	70	2.32	1.56
comp100460_c0	comp100460_c0_seq1	1124	1070.54	3.85	0.23	0.15
comp100462_c0	comp100462_c0_seq1	3486	3432.54	2056.98	37.57	25.25
comp100463_c0	comp100463_c0_seq1,comp100463_c0_seq2,comp100463_c0_seq3,comp100463_c0_seq4,comp100463_c0_seq5	1886.25	1832.79	304	10.41	7
comp100464_c0	comp100464_c0_seq1,comp100464_c0_seq3,comp100464_c0_seq5	1491.75	1438.29	140	6.12	4.11
comp100464_c3	comp100464_c3_seq1	1814	1760.54	94	3.35	2.25
comp100465_c0	comp100465_c0_seq1,comp100465_c0_seq2,comp100465_c0_seq3,comp100465_c0_seq4,comp100465_c0_seq5	3240.58	3187.12	873.64	17.19	11.55
comp100466_c0	comp100466_c0_seq1,comp100466_c0_seq2,comp100466_c0_seq3	565.66	512.22	204	25.2	16.94
comp100466_c1	comp100466_c1_seq1,comp100466_c1_seq2,comp100466_c1_seq3,comp100466_c1_seq4,comp100466_c1_seq5	2576.78	2523.32	540.99	13.45	9.04
comp100467_c0	comp100467_c0_seq1	1297	1243.54	51.99	2.63	1.77
comp100468_c0	comp100468_c0_seq1,comp100468_c0_seq2	3352.31	3298.85	1041.19	19.79	13.3
comp100469_c0	comp100469_c0_seq1,comp100469_c0_seq2,comp100469_c0_seq3,comp100469_c0_seq4,comp100469_c0_seq5	2520.03	2466.58	220	5.6	3.76
comp10047_c0	comp10047_c0_seq1	1014	960.54	2	0.13	0.09
comp100470_c0	comp100470_c0_seq1,comp100470_c0_seq2,comp100470_c0_seq3	706.62	653.17	24.03	2.32	1.56
comp100471_c1	comp100471_c1_seq1,comp100471_c1_seq2,comp100471_c1_seq3,comp100471_c1_seq4,comp100471_c1_seq5	1772.81	1719.36	87	3.18	2.14
comp100471_c3	comp100471_c3_seq1,comp100471_c3_seq2,comp100471_c3_seq3,comp100471_c3_seq4,comp100471_c3_seq5	866.79	813.34	37	2.87	1.93
comp100472_c0	comp100472_c0_seq1	755	701.54	11	0.99	0.66
comp100473_c0	comp100473_c0_seq1,comp100473_c0_seq2,comp100473_c0_seq3,comp100473_c0_seq4	4158.4	4104.94	886	13.53	9.09
comp100473_c1	comp100473_c1_seq1	953	899.54	6	0.42	0.28
comp1004736_c0	comp1004736_c0_seq1	510	456.59	0	0	0
comp100474_c0	comp100474_c0_seq1	751	697.54	110.93	10.03	6.74
comp100474_c1	comp100474_c1_seq1	653	599.55	13	1.37	0.92
comp100474_c2	comp100474_c2_seq1,comp100474_c2_seq2,comp100474_c2_seq3,comp100474_c2_seq4,comp100474_c2_seq5	1721.71	1668.25	1710.02	64.38	43.27
comp100475_c0	comp100475_c0_seq1,comp100475_c0_seq2,comp100475_c0_seq3,comp100475_c0_seq4,comp100475_c0_seq5	2237.63	2184.17	190	5.46	3.67
comp100476_c0	comp100476_c0_seq1,comp100476_c0_seq2	1118.73	1065.28	49	2.89	1.95
comp100477_c0	comp100477_c0_seq1,comp100477_c0_seq2,comp100477_c0_seq3,comp100477_c0_seq4,comp100477_c0_seq5	967.01	913.55	60	4.14	2.78
comp100477_c1	comp100477_c1_seq1	697	643.55	35	3.43	2.31
comp100478_c1	comp100478_c1_seq1,comp100478_c1_seq2,comp100478_c1_seq3,comp100478_c1_seq4,comp100478_c1_seq5	1666.61	1613.15	314.91	12.26	8.24
comp100479_c0	comp100479_c0_seq1,comp100479_c0_seq2,comp100479_c0_seq3,comp100479_c0_seq4,comp100479_c0_seq5	1724.15	1670.69	946	35.56	23.9
comp100480_c0	comp100480_c0_seq1,comp100480_c0_seq5	670.99	617.54	77	7.88	5.29
comp100481_c0	comp100481_c0_seq1,comp100481_c0_seq2	3375.24	3321.78	1345.36	25.39	17.07
comp100482_c0	comp100482_c0_seq1,comp100482_c0_seq2,comp100482_c0_seq3,comp100482_c0_seq4,comp100482_c0_seq5	999.36	945.9	25	1.66	1.12
comp100483_c0	comp100483_c0_seq1,comp100483_c0_seq2,comp100483_c0_seq3	2493	2439.54	3	0.08	0.05
comp100484_c0	comp100484_c0_seq1	617	563.56	6	0.67	0.45
comp100484_c1	comp100484_c1_seq2,comp100484_c1_seq3,comp100484_c1_seq4,comp100484_c1_seq5	1876.58	1823.12	52	1.79	1.2
comp100484_c2	comp100484_c2_seq1	805	751.54	7	0.59	0.39
comp100484_c3	comp100484_c3_seq1,comp100484_c3_seq2,comp100484_c3_seq3,comp100484_c3_seq4	1103.96	1050.5	40	2.4	1.61
comp100484_c4	comp100484_c4_seq1	604	550.56	5	0.57	0.39
comp100484_c5	comp100484_c5_seq1,comp100484_c5_seq2,comp100484_c5_seq3,comp100484_c5_seq4,comp100484_c5_seq5	1766.33	1712.87	82	3.01	2.02
comp100485_c0	comp100485_c0_seq1,comp100485_c0_seq2,comp100485_c0_seq3,comp100485_c0_seq4,comp100485_c0_seq5	2274.13	2220.67	206	5.82	3.91
comp100486_c0	comp100486_c0_seq1,comp100486_c0_seq2,comp100486_c0_seq3,comp100486_c0_seq4,comp100486_c0_seq5	1715.14	1661.68	82	3.1	2.08
comp100487_c0	comp100487_c0_seq1,comp100487_c0_seq2,comp100487_c0_seq3,comp100487_c0_seq4,comp100487_c0_seq5	1010.74	957.29	131.17	8.63	5.8
comp100488_c0	comp100488_c0_seq1,comp100488_c0_seq2,comp100488_c0_seq3,comp100488_c0_seq4,comp100488_c0_seq5	1633.15	1579.7	114	4.53	3.05
comp100489_c0	comp100489_c0_seq1	825	771.54	0	0	0
comp100489_c3	comp100489_c3_seq1,comp100489_c3_seq2,comp100489_c3_seq3	1000.62	947.16	109	7.25	4.87
comp100489_c4	comp100489_c4_seq1,comp100489_c4_seq3,comp100489_c4_seq4,comp100489_c4_seq5	1173.09	1119.63	359.16	20.18	13.56
comp100489_c5	comp100489_c5_seq1	2631	2577.54	1	0.02	0.02
comp100490_c0	comp100490_c0_seq1,comp100490_c0_seq2,comp100490_c0_seq3,comp100490_c0_seq4,comp100490_c0_seq5	1356.07	1302.61	115.93	5.59	3.76
comp100491_c0	comp100491_c0_seq1	654	600.55	11	1.16	0.78
comp100491_c1	comp100491_c1_seq1,comp100491_c1_seq2,comp100491_c1_seq4,comp100491_c1_seq5	911.1	857.64	72	5.29	3.56
comp100491_c3	comp100491_c3_seq2,comp100491_c3_seq4,comp100491_c3_seq5	749.08	695.63	39.07	3.54	2.38
comp100492_c0	comp100492_c0_seq1	1031	977.54	11	0.71	0.48
comp100492_c1	comp100492_c1_seq1,comp100492_c1_seq2	916.87	863.41	30	2.19	1.47
comp100492_c2	comp100492_c2_seq1,comp100492_c2_seq2,comp100492_c2_seq3,comp100492_c2_seq4,comp100492_c2_seq5	1922.57	1869.11	244	8.2	5.51
comp100492_c3	comp100492_c3_seq1	1138	1084.54	11	0.64	0.43
comp100492_c4	comp100492_c4_seq2	679	625.55	3	0.3	0.2
comp100492_c5	comp100492_c5_seq1	906	852.54	12	0.89	0.6
comp100492_c6	comp100492_c6_seq1	1720	1666.54	23	0.87	0.58
comp100493_c0	comp100493_c0_seq1,comp100493_c0_seq2,comp100493_c0_seq3,comp100493_c0_seq4,comp100493_c0_seq5	2050.7	1997.24	330.12	10.38	6.97
comp100494_c0	comp100494_c0_seq2,comp100494_c0_seq3	936.5	883.04	0	0	0
comp100494_c1	comp100494_c1_seq2	1351	1297.54	0	0	0
comp100495_c0	comp100495_c0_seq1,comp100495_c0_seq2,comp100495_c0_seq3,comp100495_c0_seq4,comp100495_c0_seq5	1448.03	1394.57	154	6.94	4.66
comp100495_c1	comp100495_c1_seq1	1099	1045.54	14	0.84	0.57
comp100496_c1	comp100496_c1_seq1,comp100496_c1_seq2,comp100496_c1_seq3,comp100496_c1_seq4,comp100496_c1_seq5	2375.61	2322.15	149	4.03	2.71
comp100497_c0	comp100497_c0_seq1,comp100497_c0_seq2	1180.51	1127.06	121	6.75	4.54
comp100498_c1	comp100498_c1_seq1,comp100498_c1_seq2,comp100498_c1_seq3,comp100498_c1_seq4,comp100498_c1_seq5	799.9	746.45	22	1.86	1.25
comp100499_c0	comp100499_c0_seq1,comp100499_c0_seq3	737.72	684.26	25	2.31	1.55
comp1005_c0	comp1005_c0_seq1	570	516.57	0	0	0
comp10050_c0	comp10050_c0_seq1	683	629.55	6	0.6	0.4
comp100500_c1	comp100500_c1_seq1	569	515.57	3	0.37	0.25
comp100501_c1	comp100501_c1_seq1,comp100501_c1_seq2	908	854.54	5	0.37	0.25
comp100502_c2	comp100502_c2_seq1	1024	970.54	1	0.06	0.04
comp100502_c3	comp100502_c3_seq1	615	561.56	6	0.68	0.45
comp100502_c4	comp100502_c4_seq1,comp100502_c4_seq2,comp100502_c4_seq3,comp100502_c4_seq4,comp100502_c4_seq5	1486.29	1432.83	134	5.88	3.95
comp100502_c5	comp100502_c5_seq1,comp100502_c5_seq2,comp100502_c5_seq3,comp100502_c5_seq4	862.59	809.13	24	1.87	1.26
comp100503_c0	comp100503_c0_seq1,comp100503_c0_seq2	577.81	524.37	8	0.96	0.65
comp100503_c1	comp100503_c1_seq1,comp100503_c1_seq2,comp100503_c1_seq3,comp100503_c1_seq4,comp100503_c1_seq5	3847.39	3793.93	54	0.89	0.6
comp100503_c4	comp100503_c4_seq1,comp100503_c4_seq2,comp100503_c4_seq3,comp100503_c4_seq4	1528.34	1474.88	488.99	20.83	14
comp100503_c5	comp100503_c5_seq1,comp100503_c5_seq2,comp100503_c5_seq3,comp100503_c5_seq4	1805.4	1751.94	36	1.29	0.87
comp100503_c6	comp100503_c6_seq1	1493	1439.54	18	0.79	0.53
comp100503_c7	comp100503_c7_seq1	795	741.54	24	2.04	1.37
comp100503_c8	comp100503_c8_seq1	736	682.55	41	3.79	2.55
comp100504_c1	comp100504_c1_seq1,comp100504_c1_seq2,comp100504_c1_seq3,comp100504_c1_seq4,comp100504_c1_seq5	1212.76	1159.3	62	3.36	2.26
comp1005047_c0	comp1005047_c0_seq1	640	586.56	0	0	0
comp100505_c0	comp100505_c0_seq1,comp100505_c0_seq2,comp100505_c0_seq3,comp100505_c0_seq4,comp100505_c0_seq5	1988.98	1935.52	2124.33	68.9	46.31
comp100506_c0	comp100506_c0_seq1,comp100506_c0_seq3,comp100506_c0_seq4,comp100506_c0_seq5	806.93	753.49	21	1.76	1.18
comp100507_c0	comp100507_c0_seq1	2037	1983.54	661	20.92	14.06
comp100508_c0	comp100508_c0_seq1	1612	1558.54	79.04	3.19	2.14
comp100509_c0	comp100509_c0_seq1,comp100509_c0_seq2	1297	1243.54	51	2.58	1.73
comp100509_c1	comp100509_c1_seq1,comp100509_c1_seq2,comp100509_c1_seq3,comp100509_c1_seq4,comp100509_c1_seq5	868.79	815.34	37	2.86	1.92
comp100510_c0	comp100510_c0_seq1,comp100510_c0_seq2,comp100510_c0_seq3,comp100510_c0_seq4	2652.38	2598.92	677.9	16.36	11
comp100511_c0	comp100511_c0_seq1,comp100511_c0_seq2,comp100511_c0_seq3,comp100511_c0_seq4,comp100511_c0_seq5	1588.22	1534.76	107	4.38	2.94
comp100512_c2	comp100512_c2_seq2,comp100512_c2_seq3,comp100512_c2_seq4,comp100512_c2_seq5	1679	1625.54	108	4.17	2.8
comp1005128_c0	comp1005128_c0_seq1	512	458.58	0	0	0
comp100513_c0	comp100513_c0_seq1,comp100513_c0_seq2	513.05	459.63	36	4.96	3.33
comp100513_c1	comp100513_c1_seq1,comp100513_c1_seq3,comp100513_c1_seq5	636.82	583.39	59	6.39	4.29
comp100513_c2	comp100513_c2_seq1,comp100513_c2_seq2,comp100513_c2_seq4,comp100513_c2_seq5	1237.47	1184.02	172	9.14	6.14
comp100514_c0	comp100514_c0_seq1	2185	2131.54	368.02	10.84	7.28
comp100515_c0	comp100515_c0_seq1,comp100515_c0_seq2,comp100515_c0_seq3,comp100515_c0_seq4	833.06	779.61	82.09	6.64	4.46
comp100516_c0	comp100516_c0_seq1,comp100516_c0_seq2,comp100516_c0_seq3,comp100516_c0_seq4,comp100516_c0_seq5	3884.3	3830.84	139	2.27	1.53
comp100516_c1	comp100516_c1_seq1	1175	1121.54	20	1.12	0.75
comp100517_c0	comp100517_c0_seq1,comp100517_c0_seq2,comp100517_c0_seq3,comp100517_c0_seq4,comp100517_c0_seq5	1209.74	1156.29	290.64	15.81	10.63
comp100517_c1	comp100517_c1_seq1,comp100517_c1_seq2	701.77	648.32	31	3.02	2.03
comp100518_c0	comp100518_c0_seq1	1320	1266.54	12	0.6	0.4
comp100518_c2	comp100518_c2_seq1,comp100518_c2_seq2,comp100518_c2_seq3,comp100518_c2_seq4,comp100518_c2_seq5	1242.85	1189.39	120	6.35	4.26
comp100519_c1	comp100519_c1_seq1,comp100519_c1_seq2,comp100519_c1_seq3	1595.22	1541.76	155459	6334.72	4257.79
comp100520_c0	comp100520_c0_seq1	1626	1572.54	16	0.64	0.43
comp100521_c0	comp100521_c0_seq3,comp100521_c0_seq4,comp100521_c0_seq5	678.48	625.03	43	4.34	2.92
comp100522_c0	comp100522_c0_seq1,comp100522_c0_seq2,comp100522_c0_seq3,comp100522_c0_seq4,comp100522_c0_seq5	2300.33	2246.88	101	2.82	1.9
comp100523_c2	comp100523_c2_seq1,comp100523_c2_seq4,comp100523_c2_seq5	1094.94	1041.48	99	5.98	4.02
comp100523_c3	comp100523_c3_seq1,comp100523_c3_seq2,comp100523_c3_seq3	1402	1348.54	2	0.09	0.06
comp100523_c5	comp100523_c5_seq1,comp100523_c5_seq2,comp100523_c5_seq3,comp100523_c5_seq4,comp100523_c5_seq5	1211.14	1157.68	225	12.22	8.22
comp100524_c0	comp100524_c0_seq1,comp100524_c0_seq2,comp100524_c0_seq3,comp100524_c0_seq4,comp100524_c0_seq5	2187.06	2133.6	157	4.62	3.1
comp100525_c1	comp100525_c1_seq1,comp100525_c1_seq2,comp100525_c1_seq4,comp100525_c1_seq5	1246.19	1192.74	395.1	20.83	14
comp100526_c0	comp100526_c0_seq1,comp100526_c0_seq3	2299.91	2246.45	30	0.84	0.56
comp100527_c1	comp100527_c1_seq1,comp100527_c1_seq2,comp100527_c1_seq3,comp100527_c1_seq4,comp100527_c1_seq5	1149.75	1096.29	48.99	2.81	1.89
comp100528_c0	comp100528_c0_seq1,comp100528_c0_seq3,comp100528_c0_seq4,comp100528_c0_seq5	961.83	908.37	211.99	14.7	9.88
comp100528_c1	comp100528_c1_seq1	578	524.57	8	0.96	0.65
comp1005288_c0	comp1005288_c0_seq1	750	696.54	0	0	0
comp100529_c0	comp100529_c0_seq1	2167	2113.54	29	0.86	0.58
comp100530_c1	comp100530_c1_seq1,comp100530_c1_seq2,comp100530_c1_seq3	2513	2459.54	83	2.12	1.42
comp100531_c0	comp100531_c0_seq1,comp100531_c0_seq2,comp100531_c0_seq3	1911.8	1858.34	785.04	26.52	17.83
comp100532_c0	comp100532_c0_seq1,comp100532_c0_seq2,comp100532_c0_seq3,comp100532_c0_seq4,comp100532_c0_seq5	7945.26	7891.8	254	2.02	1.35
comp100533_c0	comp100533_c0_seq1,comp100533_c0_seq3,comp100533_c0_seq4	1712.37	1658.91	313.25	11.86	7.97
comp100534_c0	comp100534_c0_seq1	1113	1059.54	15	0.89	0.6
comp100534_c2	comp100534_c2_seq1	801	747.54	48	4.05	2.72
comp100534_c7	comp100534_c7_seq1,comp100534_c7_seq2,comp100534_c7_seq3,comp100534_c7_seq4,comp100534_c7_seq5	924.51	871.06	100	7.23	4.86
comp100535_c1	comp100535_c1_seq1,comp100535_c1_seq2,comp100535_c1_seq3,comp100535_c1_seq4,comp100535_c1_seq5	1557.33	1503.88	27	1.13	0.76
comp100536_c1	comp100536_c1_seq1	1621	1567.54	16	0.64	0.43
comp100537_c0	comp100537_c0_seq1,comp100537_c0_seq3	602.06	548.63	32	3.69	2.48
comp100538_c0	comp100538_c0_seq1,comp100538_c0_seq2,comp100538_c0_seq3,comp100538_c0_seq4,comp100538_c0_seq5	1548.78	1495.32	547	22.98	15.45
comp100539_c0	comp100539_c0_seq2	527	473.58	2	0.27	0.18
comp100540_c0	comp100540_c0_seq1,comp100540_c0_seq2,comp100540_c0_seq4	1803.19	1749.73	37	1.33	0.89
comp100541_c0	comp100541_c0_seq1,comp100541_c0_seq3,comp100541_c0_seq4,comp100541_c0_seq5	1435.76	1382.3	159	7.23	4.86
comp100541_c1	comp100541_c1_seq1	535	481.58	0	0	0
comp100542_c0	comp100542_c0_seq1,comp100542_c0_seq2,comp100542_c0_seq3,comp100542_c0_seq4	2344	2290.54	56	1.53	1.03
comp100542_c1	comp100542_c1_seq1	1065	1011.54	6	0.37	0.25
comp100543_c0	comp100543_c0_seq1	650	596.55	22.98	2.43	1.64
comp100544_c1	comp100544_c1_seq1,comp100544_c1_seq2,comp100544_c1_seq3,comp100544_c1_seq4,comp100544_c1_seq5	1498.92	1445.46	110	4.78	3.21
comp100544_c2	comp100544_c2_seq1	920	866.54	123	8.94	6.01
comp100545_c0	comp100545_c0_seq2,comp100545_c0_seq3,comp100545_c0_seq4	676.64	623.2	18	1.82	1.23
comp100546_c2	comp100546_c2_seq1,comp100546_c2_seq2,comp100546_c2_seq3,comp100546_c2_seq4	1904.61	1851.15	48	1.63	1.09
comp100546_c3	comp100546_c3_seq1,comp100546_c3_seq3,comp100546_c3_seq4,comp100546_c3_seq5	1001	947.54	100	6.65	4.47
comp100547_c0	comp100547_c0_seq1	2445	2391.54	34	0.89	0.6
comp100548_c0	comp100548_c0_seq1,comp100548_c0_seq2,comp100548_c0_seq3	857.29	803.84	539.08	42.27	28.41
comp100549_c0	comp100549_c0_seq1,comp100549_c0_seq2,comp100549_c0_seq3,comp100549_c0_seq4,comp100549_c0_seq5	1866.88	1813.42	1057.01	36.6	24.6
comp100550_c0	comp100550_c0_seq1,comp100550_c0_seq2	1214.47	1161.01	32	1.73	1.17
comp100550_c1	comp100550_c1_seq1,comp100550_c1_seq2,comp100550_c1_seq3,comp100550_c1_seq4	1310.3	1256.84	91.02	4.55	3.06
comp1005508_c0	comp1005508_c0_seq1	756	702.54	4	0.36	0.24
comp100551_c0	comp100551_c0_seq1,comp100551_c0_seq2,comp100551_c0_seq3,comp100551_c0_seq4,comp100551_c0_seq5	1604.07	1550.61	929.38	37.65	25.31
comp100552_c0	comp100552_c0_seq1,comp100552_c0_seq2,comp100552_c0_seq3,comp100552_c0_seq4,comp100552_c0_seq5	1371.51	1318.05	262.08	12.5	8.4
comp100553_c1	comp100553_c1_seq2,comp100553_c1_seq5	2982.56	2929.1	438.73	9.39	6.31
comp100553_c3	comp100553_c3_seq1,comp100553_c3_seq2,comp100553_c3_seq3,comp100553_c3_seq4	1796.08	1742.62	187	6.74	4.53
comp100554_c0	comp100554_c0_seq1,comp100554_c0_seq2,comp100554_c0_seq3,comp100554_c0_seq5	599.99	546.55	10	1.16	0.78
comp100555_c1	comp100555_c1_seq1	1619	1565.54	34	1.36	0.92
comp100557_c0	comp100557_c0_seq1,comp100557_c0_seq3,comp100557_c0_seq4,comp100557_c0_seq5	2925.32	2871.86	147.24	3.22	2.16
comp100557_c1	comp100557_c1_seq1	553	499.57	11	1.39	0.94
comp100558_c0	comp100558_c0_seq1,comp100558_c0_seq2,comp100558_c0_seq3,comp100558_c0_seq4,comp100558_c0_seq5	964.64	911.18	70.38	4.86	3.27
comp100558_c1	comp100558_c1_seq2,comp100558_c1_seq3,comp100558_c1_seq4	768.63	715.18	25.33	2.23	1.5
comp100559_c0	comp100559_c0_seq1,comp100559_c0_seq2,comp100559_c0_seq3	1342.49	1289.03	39	1.9	1.28
comp100560_c0	comp100560_c0_seq1	1407	1353.54	21	0.98	0.66
comp100561_c1	comp100561_c1_seq1	1021	967.54	27	1.76	1.18
comp100561_c3	comp100561_c3_seq1,comp100561_c3_seq2,comp100561_c3_seq3,comp100561_c3_seq4	868.01	814.56	50	3.87	2.6
comp100561_c5	comp100561_c5_seq1	673	619.55	6	0.61	0.41
comp100561_c6	comp100561_c6_seq1,comp100561_c6_seq2	802	748.54	17	1.43	0.96
comp100562_c0	comp100562_c0_seq1,comp100562_c0_seq3,comp100562_c0_seq4,comp100562_c0_seq5	1475.11	1421.66	44	1.94	1.31
comp100563_c0	comp100563_c0_seq1	2814	2760.54	3020.08	68.62	46.12
comp100564_c1	comp100564_c1_seq1,comp100564_c1_seq2,comp100564_c1_seq3,comp100564_c1_seq4,comp100564_c1_seq5	1556.87	1503.41	2234.23	93.37	62.76
comp100565_c0	comp100565_c0_seq1	2766	2712.54	8111.65	187.57	126.07
comp100566_c0	comp100566_c0_seq1,comp100566_c0_seq2,comp100566_c0_seq3,comp100566_c0_seq4,comp100566_c0_seq5	834.95	781.49	50.99	4.11	2.76
comp100566_c1	comp100566_c1_seq1	2673	2619.54	73.98	1.77	1.19
comp100566_c2	comp100566_c2_seq1	1718	1664.54	2	0.08	0.05
comp100567_c0	comp100567_c0_seq1	1645	1591.54	6	0.24	0.16
comp100567_c1	comp100567_c1_seq1,comp100567_c1_seq2,comp100567_c1_seq3,comp100567_c1_seq4,comp100567_c1_seq5	974.39	920.94	210.03	14.36	9.65
comp100568_c1	comp100568_c1_seq1	536	482.58	3	0.39	0.26
comp100568_c2	comp100568_c2_seq1,comp100568_c2_seq2,comp100568_c2_seq4,comp100568_c2_seq5	787.74	734.28	41	3.52	2.37
comp100569_c0	comp100569_c0_seq2,comp100569_c0_seq3,comp100569_c0_seq4	2121.31	2067.85	21	0.64	0.43
comp100570_c1	comp100570_c1_seq1,comp100570_c1_seq2,comp100570_c1_seq4,comp100570_c1_seq5	1291.17	1237.71	147	7.47	5.02
comp100571_c0	comp100571_c0_seq1,comp100571_c0_seq2,comp100571_c0_seq3	690.16	636.71	42	4.17	2.8
comp100571_c1	comp100571_c1_seq1,comp100571_c1_seq2,comp100571_c1_seq3,comp100571_c1_seq4,comp100571_c1_seq5	894.84	841.39	14	1.05	0.7
comp100571_c4	comp100571_c4_seq2	701	647.55	9	0.88	0.59
comp100571_c5	comp100571_c5_seq1,comp100571_c5_seq2	671.1	617.65	10	1.02	0.69
comp100571_c6	comp100571_c6_seq1	701	647.55	9	0.88	0.59
comp100572_c0	comp100572_c0_seq1,comp100572_c0_seq2,comp100572_c0_seq3,comp100572_c0_seq4,comp100572_c0_seq5	1487.7	1434.24	75	3.29	2.21
comp100573_c1	comp100573_c1_seq1,comp100573_c1_seq2,comp100573_c1_seq3	1014.24	960.78	25	1.64	1.1
comp100574_c0	comp100574_c0_seq1	724	670.55	27	2.54	1.71
comp100575_c0	comp100575_c0_seq1,comp100575_c0_seq2,comp100575_c0_seq3,comp100575_c0_seq4,comp100575_c0_seq5	2359.35	2305.89	76	2.07	1.39
comp1005759_c0	comp1005759_c0_seq1	500	446.59	0	0	0
comp100576_c0	comp100576_c0_seq1,comp100576_c0_seq2	1196	1142.54	10	0.55	0.37
comp100576_c1	comp100576_c1_seq1,comp100576_c1_seq2	607	553.56	12	1.37	0.92
comp100576_c2	comp100576_c2_seq1,comp100576_c2_seq2,comp100576_c2_seq3,comp100576_c2_seq4,comp100576_c2_seq5	2376.24	2322.78	33	0.89	0.6
comp100577_c0	comp100577_c0_seq1,comp100577_c0_seq2,comp100577_c0_seq3,comp100577_c0_seq4	2225.05	2171.59	595.32	17.2	11.56
comp100578_c0	comp100578_c0_seq1,comp100578_c0_seq2,comp100578_c0_seq3,comp100578_c0_seq4,comp100578_c0_seq5	828.54	775.09	19	1.55	1.04
comp100579_c2	comp100579_c2_seq1,comp100579_c2_seq2,comp100579_c2_seq3,comp100579_c2_seq4,comp100579_c2_seq5	807.28	753.83	75	6.27	4.22
comp100579_c4	comp100579_c4_seq1,comp100579_c4_seq2	1101	1047.54	27	1.62	1.09
comp100580_c0	comp100580_c0_seq1	892	838.54	31	2.33	1.57
comp100580_c1	comp100580_c1_seq1,comp100580_c1_seq2,comp100580_c1_seq3,comp100580_c1_seq4,comp100580_c1_seq5	4435.48	4382.02	73	1.04	0.7
comp100581_c0	comp100581_c0_seq1	883	829.54	14	1.06	0.71
comp100582_c1	comp100582_c1_seq1	1150	1096.54	190.02	10.9	7.33
comp100583_c0	comp100583_c0_seq1,comp100583_c0_seq2	1618.49	1565.03	91	3.65	2.46
comp100583_c1	comp100583_c1_seq1,comp100583_c1_seq2,comp100583_c1_seq3,comp100583_c1_seq4,comp100583_c1_seq5	4618.26	4564.8	118	1.62	1.09
comp100584_c1	comp100584_c1_seq1,comp100584_c1_seq2,comp100584_c1_seq3,comp100584_c1_seq4,comp100584_c1_seq5	1190.61	1137.15	299	16.54	11.12
comp100585_c0	comp100585_c0_seq1,comp100585_c0_seq2	2160	2106.54	55	1.64	1.1
comp100586_c1	comp100586_c1_seq1,comp100586_c1_seq3,comp100586_c1_seq4,comp100586_c1_seq5	4718.99	4665.53	690	9.27	6.23
comp100587_c0	comp100587_c0_seq1,comp100587_c0_seq2,comp100587_c0_seq3,comp100587_c0_seq4,comp100587_c0_seq5	1670.06	1616.6	265	10.3	6.92
comp100588_c1	comp100588_c1_seq1	534	480.58	9	1.19	0.8
comp100588_c2	comp100588_c2_seq1,comp100588_c2_seq2,comp100588_c2_seq3,comp100588_c2_seq4,comp100588_c2_seq5	1080.83	1027.39	53	3.25	2.18
comp100588_c4	comp100588_c4_seq1,comp100588_c4_seq2,comp100588_c4_seq3,comp100588_c4_seq4,comp100588_c4_seq5	1111.74	1058.28	92	5.47	3.68
comp100588_c5	comp100588_c5_seq1	914	860.54	19	1.39	0.93
comp100589_c0	comp100589_c0_seq1,comp100589_c0_seq2,comp100589_c0_seq3,comp100589_c0_seq4,comp100589_c0_seq5	1443.58	1390.12	2293.93	103.71	69.71
comp100590_c0	comp100590_c0_seq2,comp100590_c0_seq3,comp100590_c0_seq4	2776.59	2723.13	144	3.32	2.23
comp100590_c1	comp100590_c1_seq1	1081	1027.54	6	0.37	0.25
comp100591_c0	comp100591_c0_seq1	548	494.57	0	0	0
comp100591_c1	comp100591_c1_seq1	660	606.55	15	1.56	1.05
comp100591_c3	comp100591_c3_seq2,comp100591_c3_seq3,comp100591_c3_seq4,comp100591_c3_seq5	1596.31	1542.85	575.89	23.45	15.76
comp100591_c4	comp100591_c4_seq1	510	456.59	2	0.28	0.19
comp100592_c0	comp100592_c0_seq1,comp100592_c0_seq2,comp100592_c0_seq3,comp100592_c0_seq5	1450.9	1397.44	12	0.54	0.36
comp100592_c1	comp100592_c1_seq1	887	833.54	4	0.3	0.2
comp100592_c2	comp100592_c2_seq1,comp100592_c2_seq3,comp100592_c2_seq4	668.95	615.51	14	1.44	0.97
comp100593_c0	comp100593_c0_seq1,comp100593_c0_seq2,comp100593_c0_seq3,comp100593_c0_seq4,comp100593_c0_seq5	1356.47	1303.01	304	14.67	9.86
comp100594_c0	comp100594_c0_seq1	870	816.54	6	0.46	0.31
comp100594_c1	comp100594_c1_seq1	2124	2070.54	20	0.61	0.41
comp100594_c2	comp100594_c2_seq1	869	815.54	20	1.55	1.04
comp100594_c3	comp100594_c3_seq1	635	581.56	2	0.22	0.15
comp100594_c4	comp100594_c4_seq1,comp100594_c4_seq2,comp100594_c4_seq3,comp100594_c4_seq5	2551.71	2498.25	190	4.77	3.21
comp100594_c5	comp100594_c5_seq1,comp100594_c5_seq2	1603	1549.54	0	0	0
comp100594_c6	comp100594_c6_seq1	656	602.55	2	0.21	0.14
comp100594_c7	comp100594_c7_seq1,comp100594_c7_seq2,comp100594_c7_seq4,comp100594_c7_seq5	1380	1326.55	20	0.95	0.64
comp100595_c0	comp100595_c0_seq1,comp100595_c0_seq2,comp100595_c0_seq3,comp100595_c0_seq4,comp100595_c0_seq5	1797.53	1744.07	482	17.35	11.66
comp100595_c1	comp100595_c1_seq1	541	487.58	6	0.78	0.52
comp100595_c2	comp100595_c2_seq1,comp100595_c2_seq2	2035.64	1982.19	269.08	8.52	5.73
comp100595_c3	comp100595_c3_seq1	758	704.54	1	0.09	0.06
comp100596_c0	comp100596_c0_seq1,comp100596_c0_seq2,comp100596_c0_seq3,comp100596_c0_seq4,comp100596_c0_seq5	1559.24	1505.78	317	13.23	8.89
comp100597_c0	comp100597_c0_seq1,comp100597_c0_seq2,comp100597_c0_seq3,comp100597_c0_seq4,comp100597_c0_seq5	2847.67	2794.21	764.03	17.15	11.53
comp100598_c0	comp100598_c0_seq1,comp100598_c0_seq2	792	738.54	10	0.85	0.57
comp100599_c0	comp100599_c0_seq1,comp100599_c0_seq2	1867.49	1814.03	13	0.45	0.3
comp100600_c0	comp100600_c0_seq1,comp100600_c0_seq2,comp100600_c0_seq3,comp100600_c0_seq4	2201.49	2148.03	24317.5	710.48	477.54
comp100601_c1	comp100601_c1_seq1	2070	2016.54	18	0.56	0.38
comp100601_c2	comp100601_c2_seq1	1627	1573.54	17	0.68	0.46
comp100601_c3	comp100601_c3_seq1	781	727.54	7	0.61	0.41
comp100601_c4	comp100601_c4_seq2,comp100601_c4_seq3,comp100601_c4_seq4,comp100601_c4_seq5	1148.4	1094.95	41.05	2.36	1.59
comp100601_c6	comp100601_c6_seq1	610	556.56	4	0.45	0.31
comp100601_c7	comp100601_c7_seq1	1880	1826.54	17	0.58	0.39
comp100601_c8	comp100601_c8_seq1	544	490.57	0	0	0
comp100602_c1	comp100602_c1_seq2,comp100602_c1_seq3,comp100602_c1_seq4,comp100602_c1_seq5	2352.39	2298.93	130	3.55	2.38
comp100602_c3	comp100602_c3_seq1	838	784.54	12	0.96	0.65
comp100603_c0	comp100603_c0_seq1,comp100603_c0_seq2	1585	1531.54	3	0.12	0.08
comp100604_c0	comp100604_c0_seq1,comp100604_c0_seq2	1504	1450.54	16	0.69	0.47
comp100605_c0	comp100605_c0_seq1,comp100605_c0_seq2,comp100605_c0_seq3,comp100605_c0_seq4	2681.13	2627.67	28	0.67	0.45
comp100606_c1	comp100606_c1_seq1	1074	1020.54	4	0.25	0.17
comp100607_c0	comp100607_c0_seq1,comp100607_c0_seq2,comp100607_c0_seq3,comp100607_c0_seq4,comp100607_c0_seq5	1666.46	1613	1632.51	63.57	42.73
comp100608_c0	comp100608_c0_seq1,comp100608_c0_seq2,comp100608_c0_seq3,comp100608_c0_seq4	1601.79	1548.33	25.98	1.05	0.71
comp100609_c0	comp100609_c0_seq1,comp100609_c0_seq2,comp100609_c0_seq3,comp100609_c0_seq4,comp100609_c0_seq5	2740.2	2686.75	174.89	4.08	2.74
comp100609_c1	comp100609_c1_seq1	1683	1629.54	378.91	14.61	9.82
comp100609_c2	comp100609_c2_seq1,comp100609_c2_seq2	763.44	709.99	26	2.31	1.55
comp100610_c0	comp100610_c0_seq1,comp100610_c0_seq2	1538	1484.54	32	1.35	0.91
comp100611_c0	comp100611_c0_seq1,comp100611_c0_seq2,comp100611_c0_seq3,comp100611_c0_seq4	1886.23	1832.77	203	6.95	4.67
comp100612_c0	comp100612_c0_seq1,comp100612_c0_seq3	1002.82	949.37	48	3.18	2.14
comp100612_c2	comp100612_c2_seq1,comp100612_c2_seq2	830.6	777.14	39.06	3.17	2.13
comp100613_c1	comp100613_c1_seq1,comp100613_c1_seq2,comp100613_c1_seq3,comp100613_c1_seq4,comp100613_c1_seq5	1370.92	1317.46	106	5.06	3.4
comp100614_c0	comp100614_c0_seq1,comp100614_c0_seq2,comp100614_c0_seq3,comp100614_c0_seq4,comp100614_c0_seq5	1117.32	1063.86	40	2.37	1.59
comp100614_c1	comp100614_c1_seq1	649	595.55	25.03	2.66	1.78
comp100615_c0	comp100615_c0_seq1,comp100615_c0_seq2,comp100615_c0_seq3,comp100615_c0_seq4,comp100615_c0_seq5	1601.81	1548.36	118	4.79	3.22
comp100616_c1	comp100616_c1_seq1,comp100616_c1_seq2,comp100616_c1_seq3,comp100616_c1_seq4,comp100616_c1_seq5	1224.48	1171.03	871	46.78	31.44
comp100617_c1	comp100617_c1_seq1,comp100617_c1_seq2,comp100617_c1_seq3,comp100617_c1_seq5	1502.43	1448.97	83	3.6	2.42
comp1006173_c0	comp1006173_c0_seq1	513	459.58	2	0.28	0.19
comp100618_c0	comp100618_c0_seq1,comp100618_c0_seq2	2297.18	2243.72	364	10.18	6.84
comp100619_c1	comp100619_c1_seq1	727	673.55	3	0.28	0.19
comp100619_c3	comp100619_c3_seq1,comp100619_c3_seq2,comp100619_c3_seq3,comp100619_c3_seq4,comp100619_c3_seq5	1054.07	1000.61	116.02	7.3	4.91
comp10062_c0	comp10062_c0_seq1	847	793.54	0	0	0
comp100620_c0	comp100620_c0_seq1,comp100620_c0_seq2,comp100620_c0_seq3,comp100620_c0_seq4,comp100620_c0_seq5	2132.85	2079.39	927.69	28	18.82
comp100621_c0	comp100621_c0_seq1,comp100621_c0_seq2,comp100621_c0_seq3,comp100621_c0_seq4	1353.03	1299.57	142	6.87	4.62
comp100622_c0	comp100622_c0_seq1,comp100622_c0_seq2,comp100622_c0_seq3,comp100622_c0_seq4,comp100622_c0_seq5	3421.88	3368.42	1582.52	29.46	19.8
comp100623_c0	comp100623_c0_seq1,comp100623_c0_seq2,comp100623_c0_seq3,comp100623_c0_seq4,comp100623_c0_seq5	2698.53	2645.07	58	1.38	0.92
comp100624_c0	comp100624_c0_seq1,comp100624_c0_seq2,comp100624_c0_seq3,comp100624_c0_seq4,comp100624_c0_seq5	3302.84	3249.38	556	10.73	7.21
comp100624_c1	comp100624_c1_seq1,comp100624_c1_seq2,comp100624_c1_seq3,comp100624_c1_seq4,comp100624_c1_seq5	1668.46	1615	15	0.58	0.39
comp100625_c1	comp100625_c1_seq2,comp100625_c1_seq3,comp100625_c1_seq5	750.34	696.89	53	4.8	3.23
comp100626_c0	comp100626_c0_seq1,comp100626_c0_seq2,comp100626_c0_seq3,comp100626_c0_seq4,comp100626_c0_seq5	1083.27	1029.81	140	8.56	5.75
comp100627_c0	comp100627_c0_seq1	713	659.55	13	1.24	0.84
comp100627_c1	comp100627_c1_seq1,comp100627_c1_seq2	2341	2287.54	87	2.39	1.6
comp100628_c0	comp100628_c0_seq1,comp100628_c0_seq2,comp100628_c0_seq3,comp100628_c0_seq4	1972.01	1918.55	168	5.5	3.69
comp100629_c0	comp100629_c0_seq1,comp100629_c0_seq2,comp100629_c0_seq3,comp100629_c0_seq4,comp100629_c0_seq5	2793.83	2740.37	1348	30.85	20.74
comp100630_c0	comp100630_c0_seq1	777	723.54	2	0.17	0.12
comp100630_c1	comp100630_c1_seq1,comp100630_c1_seq2,comp100630_c1_seq3,comp100630_c1_seq4,comp100630_c1_seq5	1256.55	1203.09	68	3.55	2.39
comp100630_c2	comp100630_c2_seq1	869	815.54	14	1.08	0.73
comp100630_c3	comp100630_c3_seq1	632	578.56	7	0.76	0.51
comp100631_c1	comp100631_c1_seq1,comp100631_c1_seq3,comp100631_c1_seq4	956.35	902.9	60	4.19	2.81
comp100631_c2	comp100631_c2_seq1,comp100631_c2_seq2	1056.21	1002.76	26	1.63	1.1
comp100632_c1	comp100632_c1_seq1	674	620.55	19	1.93	1.3
comp100632_c2	comp100632_c2_seq1	785	731.54	26	2.24	1.51
comp100632_c5	comp100632_c5_seq1,comp100632_c5_seq3,comp100632_c5_seq4,comp100632_c5_seq5	672.12	618.68	116	11.84	7.96
comp100633_c1	comp100633_c1_seq1,comp100633_c1_seq2	730.96	677.51	14	1.3	0.88
comp100633_c2	comp100633_c2_seq1,comp100633_c2_seq2,comp100633_c2_seq3,comp100633_c2_seq4	798.18	744.73	76.48	6.48	4.35
comp100633_c5	comp100633_c5_seq1	565	511.57	32	3.96	2.66
comp100633_c6	comp100633_c6_seq1,comp100633_c6_seq2,comp100633_c6_seq3,comp100633_c6_seq4,comp100633_c6_seq5	1781.66	1728.2	43	1.56	1.05
comp100633_c7	comp100633_c7_seq1	538	484.58	9	1.18	0.79
comp100634_c1	comp100634_c1_seq2	679	625.55	10	1.01	0.68
comp100634_c2	comp100634_c2_seq1,comp100634_c2_seq2,comp100634_c2_seq3,comp100634_c2_seq4	543	489.57	7	0.91	0.61
comp100635_c1	comp100635_c1_seq4	638	584.56	3	0.32	0.22
comp100635_c2	comp100635_c2_seq1,comp100635_c2_seq2,comp100635_c2_seq3,comp100635_c2_seq4,comp100635_c2_seq5	4945.49	4892.03	4085.3	52.33	35.17
comp100636_c0	comp100636_c0_seq1,comp100636_c0_seq2,comp100636_c0_seq3	2602.76	2549.3	479.31	11.79	7.93
comp100637_c0	comp100637_c0_seq1	506	452.59	0	0	0
comp100637_c1	comp100637_c1_seq1,comp100637_c1_seq2,comp100637_c1_seq3,comp100637_c1_seq4,comp100637_c1_seq5	1684.86	1631.4	100	3.85	2.59
comp100638_c0	comp100638_c0_seq1,comp100638_c0_seq2	4182.31	4128.86	1227	18.63	12.52
comp100639_c0	comp100639_c0_seq1,comp100639_c0_seq2,comp100639_c0_seq4	769.22	715.79	47.36	4.17	2.81
comp100640_c1	comp100640_c1_seq1	1187	1133.54	0	0	0
comp100640_c2	comp100640_c2_seq1,comp100640_c2_seq2,comp100640_c2_seq3,comp100640_c2_seq4,comp100640_c2_seq5	1643.76	1590.3	110.11	4.35	2.92
comp100640_c4	comp100640_c4_seq1	2270	2216.54	20	0.57	0.38
comp100641_c0	comp100641_c0_seq1,comp100641_c0_seq2	832.38	778.93	5	0.4	0.27
comp100642_c0	comp100642_c0_seq1,comp100642_c0_seq2,comp100642_c0_seq3,comp100642_c0_seq4,comp100642_c0_seq5	1042.6	989.15	23	1.46	0.98
comp100643_c0	comp100643_c0_seq1,comp100643_c0_seq2,comp100643_c0_seq3,comp100643_c0_seq4,comp100643_c0_seq5	1496.4	1442.94	54.02	2.35	1.58
comp100644_c0	comp100644_c0_seq1,comp100644_c0_seq2,comp100644_c0_seq3,comp100644_c0_seq4,comp100644_c0_seq5	1302.79	1249.33	869.95	43.78	29.43
comp1006445_c0	comp1006445_c0_seq1	577	523.57	0	0	0
comp100645_c0	comp100645_c0_seq1	837	783.54	6	0.48	0.32
comp100645_c1	comp100645_c1_seq1,comp100645_c1_seq2	593	539.57	0	0	0
comp100645_c3	comp100645_c3_seq1,comp100645_c3_seq3,comp100645_c3_seq4,comp100645_c3_seq5	1409.6	1356.15	62	2.87	1.93
comp100646_c0	comp100646_c0_seq1,comp100646_c0_seq2,comp100646_c0_seq3,comp100646_c0_seq4,comp100646_c0_seq5	569.31	515.88	22	2.7	1.81
comp100646_c1	comp100646_c1_seq1,comp100646_c1_seq2,comp100646_c1_seq3,comp100646_c1_seq4,comp100646_c1_seq5	1721.04	1667.58	577.02	21.73	14.61
comp100646_c2	comp100646_c2_seq1	1128	1074.54	0	0	0
comp100647_c0	comp100647_c0_seq1,comp100647_c0_seq2	3396.01	3342.55	3001.26	56.3	37.84
comp100648_c0	comp100648_c0_seq1,comp100648_c0_seq2,comp100648_c0_seq3	1444.23	1390.77	37	1.67	1.12
comp100649_c1	comp100649_c1_seq1	2667	2613.54	25	0.6	0.4
comp100650_c0	comp100650_c0_seq2,comp100650_c0_seq3	742	688.55	24	2.2	1.48
comp100651_c0	comp100651_c0_seq1	878	824.54	7	0.54	0.36
comp100651_c1	comp100651_c1_seq1	575	521.57	1	0.12	0.08
comp100651_c2	comp100651_c2_seq1,comp100651_c2_seq2,comp100651_c2_seq3,comp100651_c2_seq4,comp100651_c2_seq5	2501.76	2448.3	13	0.33	0.22
comp100652_c0	comp100652_c0_seq1,comp100652_c0_seq2,comp100652_c0_seq3,comp100652_c0_seq4,comp100652_c0_seq5	922.8	869.34	117	8.48	5.7
comp100653_c0	comp100653_c0_seq1	748	694.54	16	1.45	0.98
comp100653_c1	comp100653_c1_seq1,comp100653_c1_seq2,comp100653_c1_seq3	1114.68	1061.23	65	3.85	2.59
comp100654_c0	comp100654_c0_seq3	585	531.56	3	0.36	0.24
comp100654_c3	comp100654_c3_seq2,comp100654_c3_seq4	799	745.54	6	0.51	0.34
comp100655_c0	comp100655_c0_seq1,comp100655_c0_seq2,comp100655_c0_seq3,comp100655_c0_seq5	1414	1360.54	53	2.45	1.65
comp100656_c0	comp100656_c0_seq1,comp100656_c0_seq2,comp100656_c0_seq3,comp100656_c0_seq4,comp100656_c0_seq5	1445.86	1392.4	156	7.04	4.73
comp100657_c0	comp100657_c0_seq1,comp100657_c0_seq2,comp100657_c0_seq3,comp100657_c0_seq4,comp100657_c0_seq5	1784.58	1731.12	39	1.41	0.95
comp100658_c0	comp100658_c0_seq1,comp100658_c0_seq3,comp100658_c0_seq4,comp100658_c0_seq5	950.71	897.26	251	17.62	11.84
comp100659_c0	comp100659_c0_seq1	714	660.55	51	4.87	3.28
comp100659_c1	comp100659_c1_seq1,comp100659_c1_seq2,comp100659_c1_seq3,comp100659_c1_seq4,comp100659_c1_seq5	3150.39	3096.93	110	2.23	1.5
comp100660_c3	comp100660_c3_seq1,comp100660_c3_seq3	573	519.57	4	0.49	0.33
comp100661_c0	comp100661_c0_seq1,comp100661_c0_seq2,comp100661_c0_seq3	2069.01	2015.55	1968.42	61.3	41.2
comp100662_c1	comp100662_c1_seq1,comp100662_c1_seq2,comp100662_c1_seq3,comp100662_c1_seq4,comp100662_c1_seq5	672.6	619.15	0	0	0
comp100663_c0	comp100663_c0_seq1,comp100663_c0_seq2,comp100663_c0_seq3,comp100663_c0_seq4,comp100663_c0_seq5	3560.38	3506.92	3450.21	61.68	41.46
comp100663_c1	comp100663_c1_seq1	1014	960.54	5	0.33	0.22
comp100664_c0	comp100664_c0_seq1,comp100664_c0_seq2,comp100664_c0_seq3,comp100664_c0_seq4,comp100664_c0_seq5	2752.35	2698.89	663.1	15.41	10.36
comp100665_c0	comp100665_c0_seq1,comp100665_c0_seq2,comp100665_c0_seq3,comp100665_c0_seq4,comp100665_c0_seq5	1368	1314.54	174	8.32	5.59
comp100666_c0	comp100666_c0_seq1,comp100666_c0_seq2,comp100666_c0_seq3,comp100666_c0_seq4,comp100666_c0_seq5	984.16	930.71	69	4.67	3.14
comp100667_c0	comp100667_c0_seq1,comp100667_c0_seq2,comp100667_c0_seq3,comp100667_c0_seq4,comp100667_c0_seq5	2257.17	2203.71	563.61	16.05	10.79
comp100668_c0	comp100668_c0_seq1,comp100668_c0_seq2,comp100668_c0_seq3	979.63	926.17	68	4.62	3.11
comp100668_c1	comp100668_c1_seq1	555	501.57	12	1.51	1.02
comp100668_c2	comp100668_c2_seq1	611	557.56	26	2.95	1.98
comp100668_c3	comp100668_c3_seq1,comp100668_c3_seq2	642.04	588.6	39	4.19	2.81
comp100668_c4	comp100668_c4_seq1,comp100668_c4_seq2,comp100668_c4_seq3	540	486.58	1	0.13	0.09
comp100669_c0	comp100669_c0_seq1,comp100669_c0_seq2	755.82	702.37	66	5.93	3.98
comp100670_c0	comp100670_c0_seq1,comp100670_c0_seq2,comp100670_c0_seq3,comp100670_c0_seq4	2965.73	2912.27	4643.74	100	67.21
comp100671_c0	comp100671_c0_seq1,comp100671_c0_seq2,comp100671_c0_seq3	1142.74	1089.28	50	2.89	1.94
comp100672_c1	comp100672_c1_seq1,comp100672_c1_seq2,comp100672_c1_seq3,comp100672_c1_seq5	2176.3	2122.84	1220.98	36.1	24.26
comp100673_c0	comp100673_c0_seq1	925	871.54	3	0.22	0.15
comp100673_c1	comp100673_c1_seq1,comp100673_c1_seq2,comp100673_c1_seq3,comp100673_c1_seq4,comp100673_c1_seq5	2141.19	2087.73	42	1.26	0.85
comp100674_c0	comp100674_c0_seq1,comp100674_c0_seq2,comp100674_c0_seq3,comp100674_c0_seq4,comp100674_c0_seq5	1673.18	1619.72	309.91	12.02	8.08
comp100675_c0	comp100675_c0_seq1,comp100675_c0_seq3,comp100675_c0_seq4,comp100675_c0_seq5	5014.98	4961.53	683.51	8.63	5.8
comp100676_c1	comp100676_c1_seq1	591	537.56	0	0	0
comp100676_c2	comp100676_c2_seq1,comp100676_c2_seq2,comp100676_c2_seq3,comp100676_c2_seq4,comp100676_c2_seq5	820.02	766.56	94.91	7.81	5.25
comp100677_c0	comp100677_c0_seq1,comp100677_c0_seq2	839.47	786.04	6	0.48	0.32
comp100678_c0	comp100678_c0_seq1	566	512.57	0	0	0
comp100678_c1	comp100678_c1_seq1,comp100678_c1_seq2,comp100678_c1_seq4,comp100678_c1_seq5	1465.8	1412.35	328	14.59	9.81
comp100679_c2	comp100679_c2_seq1,comp100679_c2_seq2,comp100679_c2_seq3,comp100679_c2_seq4,comp100679_c2_seq5	846.7	793.24	13	1.03	0.69
comp100679_c3	comp100679_c3_seq1,comp100679_c3_seq2,comp100679_c3_seq3,comp100679_c3_seq4,comp100679_c3_seq5	1268.21	1214.75	35	1.81	1.22
comp100680_c0	comp100680_c0_seq1,comp100680_c0_seq2,comp100680_c0_seq3,comp100680_c0_seq4,comp100680_c0_seq5	1543.6	1490.14	120	5.06	3.4
comp100681_c0	comp100681_c0_seq1	993	939.54	1	0.07	0.05
comp100682_c0	comp100682_c0_seq1,comp100682_c0_seq2,comp100682_c0_seq3,comp100682_c0_seq4,comp100682_c0_seq5	1645.75	1592.29	510	20.12	13.52
comp100683_c1	comp100683_c1_seq1,comp100683_c1_seq2,comp100683_c1_seq3,comp100683_c1_seq4,comp100683_c1_seq5	1005.87	952.41	54	3.57	2.4
comp1006834_c0	comp1006834_c0_seq1	502	448.59	0	0	0
comp100684_c0	comp100684_c0_seq1,comp100684_c0_seq2,comp100684_c0_seq4,comp100684_c0_seq5	789.51	736.06	78	6.68	4.49
comp100684_c1	comp100684_c1_seq1	1996	1942.54	11	0.36	0.24
comp100684_c2	comp100684_c2_seq1,comp100684_c2_seq2,comp100684_c2_seq3,comp100684_c2_seq5	1833.19	1779.73	755.81	26.67	17.92
comp100685_c0	comp100685_c0_seq1	1245	1191.54	8	0.42	0.28
comp100686_c0	comp100686_c0_seq4,comp100686_c0_seq5	736.42	682.96	19	1.76	1.18
comp100687_c0	comp100687_c0_seq1,comp100687_c0_seq2,comp100687_c0_seq3	1020.1	966.64	56	3.65	2.45
comp100687_c1	comp100687_c1_seq1	690	636.55	0	0	0
comp100688_c0	comp100688_c0_seq1,comp100688_c0_seq2	1026.87	973.41	85.21	5.51	3.7
comp100689_c0	comp100689_c0_seq1,comp100689_c0_seq2,comp100689_c0_seq3,comp100689_c0_seq4,comp100689_c0_seq5	3511.63	3458.17	593	10.75	7.23
comp100689_c1	comp100689_c1_seq1	730	676.55	72	6.72	4.51
comp100690_c1	comp100690_c1_seq1	529	475.58	2	0.27	0.18
comp100691_c0	comp100691_c0_seq1,comp100691_c0_seq2,comp100691_c0_seq3,comp100691_c0_seq4,comp100691_c0_seq5	1467.26	1413.81	46	2.04	1.37
comp100691_c1	comp100691_c1_seq1	607	553.56	10	1.14	0.77
comp100691_c2	comp100691_c2_seq1	738	684.55	0	0	0
comp100692_c0	comp100692_c0_seq1,comp100692_c0_seq2,comp100692_c0_seq3,comp100692_c0_seq4,comp100692_c0_seq5	1861.2	1807.74	0	0	0
comp100692_c1	comp100692_c1_seq1	1339	1285.54	4	0.2	0.13
comp100693_c0	comp100693_c0_seq1,comp100693_c0_seq2	2202	2148.54	289	8.44	5.67
comp100694_c0	comp100694_c0_seq1,comp100694_c0_seq2	582.06	528.63	100	11.96	8.04
comp100694_c1	comp100694_c1_seq1,comp100694_c1_seq2,comp100694_c1_seq3,comp100694_c1_seq4,comp100694_c1_seq5	2647.43	2593.97	978.79	23.67	15.91
comp100695_c0	comp100695_c0_seq1	819	765.54	23	1.89	1.27
comp100695_c1	comp100695_c1_seq1,comp100695_c1_seq2,comp100695_c1_seq3	1565.11	1511.66	10	0.42	0.28
comp100695_c3	comp100695_c3_seq1,comp100695_c3_seq2,comp100695_c3_seq3,comp100695_c3_seq4	3383.41	3329.95	1339.18	25.21	16.95
comp100695_c5	comp100695_c5_seq1,comp100695_c5_seq2	2053	1999.54	11	0.35	0.23
comp100695_c7	comp100695_c7_seq1	895	841.54	4	0.3	0.2
comp100696_c0	comp100696_c0_seq1,comp100696_c0_seq2,comp100696_c0_seq3,comp100696_c0_seq4,comp100696_c0_seq5	1889.5	1836.04	98	3.35	2.25
comp100696_c1	comp100696_c1_seq1,comp100696_c1_seq2,comp100696_c1_seq3,comp100696_c1_seq4	1555	1501.54	44	1.84	1.24
comp100696_c2	comp100696_c2_seq1,comp100696_c2_seq2,comp100696_c2_seq3,comp100696_c2_seq4,comp100696_c2_seq5	1575.97	1522.52	92	3.8	2.55
comp100697_c1	comp100697_c1_seq2,comp100697_c1_seq3	587	533.56	5	0.59	0.4
comp100697_c4	comp100697_c4_seq1	789	735.54	3	0.26	0.17
comp100697_c6	comp100697_c6_seq1,comp100697_c6_seq2	1179.46	1126	24	1.34	0.9
comp100697_c7	comp100697_c7_seq1,comp100697_c7_seq2,comp100697_c7_seq4,comp100697_c7_seq5	1556.6	1503.14	38.18	1.6	1.07
comp100697_c8	comp100697_c8_seq1	1348	1294.54	21	1.02	0.69
comp100698_c1	comp100698_c1_seq1,comp100698_c1_seq2,comp100698_c1_seq3,comp100698_c1_seq4,comp100698_c1_seq5	2971.99	2918.53	520	11.17	7.51
comp100699_c0	comp100699_c0_seq1,comp100699_c0_seq2,comp100699_c0_seq3,comp100699_c0_seq4,comp100699_c0_seq5	629.47	576.03	7	0.77	0.52
comp1007_c0	comp1007_c0_seq1	565	511.57	20	2.47	1.66
comp10070_c0	comp10070_c0_seq1	517	463.58	3	0.41	0.28
comp100700_c0	comp100700_c0_seq1,comp100700_c0_seq2,comp100700_c0_seq3	540	486.58	3	0.39	0.26
comp100701_c1	comp100701_c1_seq1	522	468.58	7	0.95	0.64
comp100701_c2	comp100701_c2_seq2	630	576.56	25	2.74	1.84
comp100701_c5	comp100701_c5_seq1,comp100701_c5_seq4,comp100701_c5_seq5	973	919.55	52	3.56	2.39
comp100701_c6	comp100701_c6_seq1,comp100701_c6_seq2,comp100701_c6_seq3,comp100701_c6_seq4	870.3	816.86	58.34	4.5	3.03
comp100702_c2	comp100702_c2_seq1,comp100702_c2_seq2,comp100702_c2_seq3,comp100702_c2_seq4,comp100702_c2_seq5	1067.12	1013.67	117	7.26	4.88
comp100702_c3	comp100702_c3_seq1	651	597.55	4	0.42	0.28
comp100703_c0	comp100703_c0_seq1,comp100703_c0_seq2	2761.7	2708.24	197.35	4.57	3.07
comp100704_c0	comp100704_c0_seq1,comp100704_c0_seq2,comp100704_c0_seq3,comp100704_c0_seq4,comp100704_c0_seq5	2313.76	2260.31	564.84	15.68	10.54
comp100705_c0	comp100705_c0_seq1,comp100705_c0_seq2	3574.05	3520.61	910	16.2	10.89
comp100706_c1	comp100706_c1_seq1,comp100706_c1_seq2,comp100706_c1_seq3,comp100706_c1_seq4,comp100706_c1_seq5	1727.21	1673.76	197	7.39	4.97
comp100706_c2	comp100706_c2_seq1,comp100706_c2_seq2,comp100706_c2_seq3	871.56	818.1	22	1.69	1.14
comp100707_c0	comp100707_c0_seq1,comp100707_c0_seq2,comp100707_c0_seq3,comp100707_c0_seq4,comp100707_c0_seq5	1422.07	1368.61	305.04	14.01	9.42
comp100708_c0	comp100708_c0_seq1	1063	1009.54	0	0	0
comp100708_c1	comp100708_c1_seq1,comp100708_c1_seq2,comp100708_c1_seq3,comp100708_c1_seq4	1364.75	1311.29	0	0	0
comp100708_c2	comp100708_c2_seq1	710	656.55	0	0	0
comp100709_c0	comp100709_c0_seq1,comp100709_c0_seq2,comp100709_c0_seq3,comp100709_c0_seq4,comp100709_c0_seq5	1207.39	1153.93	306	16.68	11.21
comp100710_c0	comp100710_c0_seq1,comp100710_c0_seq2,comp100710_c0_seq4,comp100710_c0_seq5	1444.56	1391.1	52	2.35	1.58
comp100710_c4	comp100710_c4_seq2	615	561.56	39	4.39	2.95
comp100711_c0	comp100711_c0_seq2	2242	2188.54	913.09	26.18	17.6
comp100712_c0	comp100712_c0_seq1,comp100712_c0_seq3,comp100712_c0_seq4,comp100712_c0_seq5	2483.07	2429.61	739.02	19.08	12.83
comp100713_c0	comp100713_c0_seq1,comp100713_c0_seq3,comp100713_c0_seq4,comp100713_c0_seq5	1317.23	1263.77	44	2.19	1.47
comp100714_c0	comp100714_c0_seq1,comp100714_c0_seq2,comp100714_c0_seq3,comp100714_c0_seq4	1519	1465.54	15	0.64	0.43
comp100715_c0	comp100715_c0_seq1,comp100715_c0_seq2,comp100715_c0_seq3,comp100715_c0_seq4	2271.67	2218.21	524.17	14.83	9.97
comp100716_c0	comp100716_c0_seq1,comp100716_c0_seq3,comp100716_c0_seq4,comp100716_c0_seq5	1472.59	1419.13	114	5.05	3.39
comp100717_c3	comp100717_c3_seq1,comp100717_c3_seq2	665	611.55	3	0.31	0.21
comp100717_c4	comp100717_c4_seq1,comp100717_c4_seq2,comp100717_c4_seq3,comp100717_c4_seq4,comp100717_c4_seq5	841.99	788.54	6	0.48	0.32
comp100718_c0	comp100718_c0_seq1,comp100718_c0_seq4,comp100718_c0_seq5	1406.54	1353.08	30.28	1.41	0.95
comp100718_c1	comp100718_c1_seq1,comp100718_c1_seq2,comp100718_c1_seq3,comp100718_c1_seq4,comp100718_c1_seq5	1063.23	1009.78	68.07	4.24	2.85
comp100718_c2	comp100718_c2_seq1,comp100718_c2_seq2,comp100718_c2_seq3,comp100718_c2_seq4,comp100718_c2_seq5	964.07	910.61	40.97	2.83	1.9
comp100719_c0	comp100719_c0_seq1,comp100719_c0_seq2	2209.32	2155.86	913.81	26.6	17.88
comp100720_c0	comp100720_c0_seq1,comp100720_c0_seq2,comp100720_c0_seq3,comp100720_c0_seq4,comp100720_c0_seq5	1137.09	1083.63	21	1.22	0.82
comp100721_c0	comp100721_c0_seq1,comp100721_c0_seq2	4356.53	4303.07	3553	51.75	34.78
comp100722_c0	comp100722_c0_seq1,comp100722_c0_seq2	1540	1486.54	2	0.08	0.06
comp100723_c0	comp100723_c0_seq1,comp100723_c0_seq2,comp100723_c0_seq3,comp100723_c0_seq4,comp100723_c0_seq5	1509.47	1456.01	119	5.14	3.45
comp100724_c1	comp100724_c1_seq1	612	558.56	2	0.23	0.15
comp100724_c4	comp100724_c4_seq1	613	559.56	7	0.79	0.53
comp100724_c5	comp100724_c5_seq1,comp100724_c5_seq2,comp100724_c5_seq3,comp100724_c5_seq4	795.03	741.58	33	2.81	1.89
comp100724_c6	comp100724_c6_seq1,comp100724_c6_seq2	814.86	761.4	24	1.99	1.34
comp100725_c0	comp100725_c0_seq1	515	461.58	18	2.47	1.66
comp100725_c1	comp100725_c1_seq1	1216	1162.54	68.11	3.68	2.48
comp100725_c3	comp100725_c3_seq1,comp100725_c3_seq2	626.23	572.79	21	2.32	1.56
comp100726_c0	comp100726_c0_seq1,comp100726_c0_seq2	2360.13	2306.67	374	10.17	6.84
comp100727_c0	comp100727_c0_seq1,comp100727_c0_seq3,comp100727_c0_seq4,comp100727_c0_seq5	2182.46	2129.01	135	3.98	2.67
comp100728_c0	comp100728_c0_seq1,comp100728_c0_seq2,comp100728_c0_seq3,comp100728_c0_seq4	3207.61	3154.15	214	4.25	2.86
comp100729_c0	comp100729_c0_seq1,comp100729_c0_seq2	2340.03	2286.57	914	25.08	16.86
comp100730_c1	comp100730_c1_seq1,comp100730_c1_seq2	3138.21	3084.75	60	1.22	0.82
comp100731_c0	comp100731_c0_seq1,comp100731_c0_seq2,comp100731_c0_seq3,comp100731_c0_seq5	1375.55	1322.09	87.04	4.14	2.78
comp100732_c0	comp100732_c0_seq1	1601	1547.54	228.46	9.27	6.23
comp100732_c3	comp100732_c3_seq1	660	606.55	0	0	0
comp100733_c1	comp100733_c1_seq1	522	468.58	33	4.46	3
comp100733_c2	comp100733_c2_seq1,comp100733_c2_seq2,comp100733_c2_seq3,comp100733_c2_seq4,comp100733_c2_seq5	1573.54	1520.08	138.78	5.74	3.86
comp100734_c0	comp100734_c0_seq1	520	466.58	8	1.09	0.73
comp100734_c1	comp100734_c1_seq2	690	636.55	13	1.29	0.87
comp100735_c0	comp100735_c0_seq1,comp100735_c0_seq2	2979.83	2926.37	1922.98	41.21	27.7
comp100735_c1	comp100735_c1_seq1	501	447.59	0	0	0
comp100736_c0	comp100736_c0_seq1	860	806.54	9	0.7	0.47
comp100736_c1	comp100736_c1_seq1,comp100736_c1_seq2,comp100736_c1_seq3,comp100736_c1_seq4,comp100736_c1_seq5	961.35	907.92	23.01	1.6	1.07
comp100737_c0	comp100737_c0_seq1,comp100737_c0_seq2,comp100737_c0_seq3,comp100737_c0_seq4,comp100737_c0_seq5	1127.17	1073.71	106	6.21	4.18
comp100738_c1	comp100738_c1_seq1,comp100738_c1_seq2,comp100738_c1_seq3,comp100738_c1_seq4,comp100738_c1_seq5	3224.17	3170.71	129.64	2.56	1.72
comp100738_c3	comp100738_c3_seq1	2053	1999.54	28	0.88	0.59
comp100739_c0	comp100739_c0_seq1,comp100739_c0_seq2,comp100739_c0_seq3,comp100739_c0_seq4,comp100739_c0_seq5	3306.73	3253.27	866.21	16.69	11.22
comp10074_c0	comp10074_c0_seq1	565	511.57	4	0.49	0.33
comp100740_c0	comp100740_c0_seq1,comp100740_c0_seq2,comp100740_c0_seq3	773.28	719.82	3652.95	320.12	215.17
comp100741_c0	comp100741_c0_seq1	2623	2569.54	54.74	1.34	0.9
comp100742_c0	comp100742_c0_seq1,comp100742_c0_seq2,comp100742_c0_seq3,comp100742_c0_seq4,comp100742_c0_seq5	1799.63	1746.17	919.8	33.08	22.23
comp100743_c0	comp100743_c0_seq1,comp100743_c0_seq2,comp100743_c0_seq3,comp100743_c0_seq4,comp100743_c0_seq5	1163.83	1110.37	10	0.57	0.38
comp100743_c1	comp100743_c1_seq1	533	479.58	80	10.56	7.1
comp100743_c2	comp100743_c2_seq1,comp100743_c2_seq2	719.98	666.53	114	10.8	7.26
comp100743_c3	comp100743_c3_seq1,comp100743_c3_seq2,comp100743_c3_seq5	2153.25	2099.79	439.39	13.13	8.83
comp100744_c0	comp100744_c0_seq1	1139	1085.54	199	11.53	7.75
comp100744_c1	comp100744_c1_seq1	856	802.54	23	1.81	1.21
comp100744_c2	comp100744_c2_seq1,comp100744_c2_seq2,comp100744_c2_seq3,comp100744_c2_seq4,comp100744_c2_seq5	3267.34	3213.88	1249.03	24.37	16.38
comp100744_c3	comp100744_c3_seq1,comp100744_c3_seq2,comp100744_c3_seq3	3251.75	3198.29	318	6.23	4.19
comp100744_c4	comp100744_c4_seq1,comp100744_c4_seq2,comp100744_c4_seq3,comp100744_c4_seq4,comp100744_c4_seq5	1780.47	1727.02	1434.99	52.18	35.07
comp100745_c0	comp100745_c0_seq1	1556	1502.54	20	0.84	0.56
comp100746_c0	comp100746_c0_seq1,comp100746_c0_seq2,comp100746_c0_seq3	1687.82	1634.36	337	12.95	8.71
comp100747_c0	comp100747_c0_seq1	690	636.55	8	0.79	0.53
comp100747_c2	comp100747_c2_seq1,comp100747_c2_seq2,comp100747_c2_seq3,comp100747_c2_seq4,comp100747_c2_seq5	1371.17	1317.71	46	2.19	1.48
comp100748_c0	comp100748_c0_seq1	2058	2004.54	45	1.41	0.95
comp100749_c0	comp100749_c0_seq1,comp100749_c0_seq2,comp100749_c0_seq3,comp100749_c0_seq4,comp100749_c0_seq5	1981.5	1928.04	18	0.59	0.39
comp100749_c1	comp100749_c1_seq4	988	934.54	16.97	1.14	0.77
comp100750_c0	comp100750_c0_seq1	1382	1328.54	12.98	0.61	0.41
comp100751_c0	comp100751_c0_seq1,comp100751_c0_seq2,comp100751_c0_seq3,comp100751_c0_seq5	3122.51	3069.05	1159.46	23.69	15.92
comp100752_c0	comp100752_c0_seq1,comp100752_c0_seq2	691.91	638.46	15	1.48	1
comp100752_c1	comp100752_c1_seq1	659	605.55	5	0.52	0.35
comp100753_c0	comp100753_c0_seq1,comp100753_c0_seq2,comp100753_c0_seq3,comp100753_c0_seq4,comp100753_c0_seq5	1823.37	1769.91	268	9.51	6.39
comp100754_c0	comp100754_c0_seq1,comp100754_c0_seq3,comp100754_c0_seq4,comp100754_c0_seq5	1200.19	1146.73	40	2.19	1.47
comp100755_c0	comp100755_c0_seq1,comp100755_c0_seq2	2157.94	2104.48	346.75	10.34	6.95
comp100756_c0	comp100756_c0_seq1,comp100756_c0_seq2	2171	2117.54	160	4.74	3.19
comp100757_c0	comp100757_c0_seq1,comp100757_c0_seq2	1296	1242.54	24	1.21	0.82
comp100758_c0	comp100758_c0_seq2	696	642.55	75	7.37	4.95
comp100759_c0	comp100759_c0_seq1	1557	1503.54	2	0.08	0.06
comp100759_c1	comp100759_c1_seq1,comp100759_c1_seq2,comp100759_c1_seq3,comp100759_c1_seq4,comp100759_c1_seq5	761.33	707.88	33.86	3.02	2.03
comp100760_c0	comp100760_c0_seq1,comp100760_c0_seq2,comp100760_c0_seq3,comp100760_c0_seq4	5229.08	5175.62	2657.57	32.17	21.63
comp100761_c0	comp100761_c0_seq1,comp100761_c0_seq2,comp100761_c0_seq3,comp100761_c0_seq4,comp100761_c0_seq5	1546.15	1492.7	432.97	18.22	12.25
comp100761_c3	comp100761_c3_seq1	905	851.54	1	0.07	0.05
comp100762_c0	comp100762_c0_seq1,comp100762_c0_seq2,comp100762_c0_seq3,comp100762_c0_seq4,comp100762_c0_seq5	2931.38	2877.92	695.15	15.15	10.18
comp100763_c0	comp100763_c0_seq1	1555	1501.54	240	10.04	6.75
comp100764_c0	comp100764_c0_seq1,comp100764_c0_seq2,comp100764_c0_seq3,comp100764_c0_seq4	1939.67	1886.21	328.81	10.94	7.36
comp100765_c0	comp100765_c0_seq1	569	515.57	8	0.98	0.66
comp100765_c2	comp100765_c2_seq1,comp100765_c2_seq2,comp100765_c2_seq3,comp100765_c2_seq4,comp100765_c2_seq5	2274.37	2220.92	71	2.01	1.35
comp100766_c0	comp100766_c0_seq1	1519	1465.54	8	0.34	0.23
comp100767_c1	comp100767_c1_seq1,comp100767_c1_seq2,comp100767_c1_seq3,comp100767_c1_seq4,comp100767_c1_seq5	2117.92	2064.46	111	3.37	2.27
comp100767_c3	comp100767_c3_seq1,comp100767_c3_seq2	1742	1688.54	77	2.86	1.92
comp100768_c0	comp100768_c0_seq1,comp100768_c0_seq2,comp100768_c0_seq3,comp100768_c0_seq4,comp100768_c0_seq5	1020.37	966.91	45	2.93	1.97
comp100769_c0	comp100769_c0_seq1	831	777.54	9	0.73	0.49
comp100769_c2	comp100769_c2_seq1,comp100769_c2_seq2	1168.86	1115.4	90	5.08	3.41
comp100769_c4	comp100769_c4_seq1	712	658.55	3	0.29	0.19
comp100769_c5	comp100769_c5_seq2,comp100769_c5_seq3,comp100769_c5_seq4,comp100769_c5_seq5	1049.08	995.63	69	4.36	2.93
comp100769_c8	comp100769_c8_seq1	642	588.55	17.57	1.89	1.27
comp100769_c9	comp100769_c9_seq1	1109	1055.54	0	0	0
comp100770_c0	comp100770_c0_seq1,comp100770_c0_seq2,comp100770_c0_seq3,comp100770_c0_seq4,comp100770_c0_seq5	929.2	875.74	156	11.22	7.54
comp100771_c0	comp100771_c0_seq1,comp100771_c0_seq2,comp100771_c0_seq3,comp100771_c0_seq4,comp100771_c0_seq5	1292.8	1239.34	182	9.23	6.21
comp100772_c0	comp100772_c0_seq1	3053	2999.54	1247.73	26.09	17.53
comp100773_c0	comp100773_c0_seq1,comp100773_c0_seq2,comp100773_c0_seq3,comp100773_c0_seq4,comp100773_c0_seq5	2114.54	2061.08	63	1.92	1.29
comp100773_c1	comp100773_c1_seq1	992	938.54	16	1.07	0.72
comp100774_c0	comp100774_c0_seq1,comp100774_c0_seq2,comp100774_c0_seq3,comp100774_c0_seq4	1035.78	982.32	27	1.73	1.16
comp100775_c0	comp100775_c0_seq1	702	648.55	13	1.27	0.85
comp100775_c3	comp100775_c3_seq3	614	560.56	2	0.23	0.15
comp100776_c0	comp100776_c0_seq1,comp100776_c0_seq5	2369.15	2315.7	177.04	4.8	3.22
comp100777_c0	comp100777_c0_seq1,comp100777_c0_seq2,comp100777_c0_seq3,comp100777_c0_seq4,comp100777_c0_seq5	1302.33	1248.87	206	10.37	6.97
comp100778_c0	comp100778_c0_seq1,comp100778_c0_seq2,comp100778_c0_seq3,comp100778_c0_seq4,comp100778_c0_seq5	2652.21	2598.75	1772.56	42.79	28.76
comp100779_c0	comp100779_c0_seq1,comp100779_c0_seq2,comp100779_c0_seq3,comp100779_c0_seq4,comp100779_c0_seq5	696.36	642.91	145.07	14.25	9.58
comp100780_c0	comp100780_c0_seq1,comp100780_c0_seq2,comp100780_c0_seq3,comp100780_c0_seq5	1184.84	1131.38	78	4.34	2.91
comp100781_c0	comp100781_c0_seq1,comp100781_c0_seq2,comp100781_c0_seq3,comp100781_c0_seq4,comp100781_c0_seq5	2502	2448.54	106.03	2.72	1.83
comp100782_c1	comp100782_c1_seq1,comp100782_c1_seq2,comp100782_c1_seq3	2844.14	2790.68	154	3.46	2.33
comp100783_c1	comp100783_c1_seq1,comp100783_c1_seq2	1535	1481.54	9	0.38	0.26
comp1007839_c0	comp1007839_c0_seq1	614	560.56	2	0.23	0.15
comp100784_c0	comp100784_c0_seq1,comp100784_c0_seq2,comp100784_c0_seq3	891.14	837.68	25	1.88	1.26
comp100784_c1	comp100784_c1_seq1,comp100784_c1_seq2,comp100784_c1_seq3,comp100784_c1_seq4,comp100784_c1_seq5	1041.15	987.69	87	5.54	3.73
comp100785_c0	comp100785_c0_seq1	1414	1360.54	53.99	2.49	1.68
comp100786_c0	comp100786_c0_seq1,comp100786_c0_seq2,comp100786_c0_seq3,comp100786_c0_seq4,comp100786_c0_seq5	1987.48	1934.04	361.99	11.75	7.9
comp100786_c4	comp100786_c4_seq2,comp100786_c4_seq3	2442	2388.54	62	1.63	1.09
comp100787_c2	comp100787_c2_seq1,comp100787_c2_seq2,comp100787_c2_seq3,comp100787_c2_seq4,comp100787_c2_seq5	1060.42	1006.96	31	1.94	1.3
comp100787_c3	comp100787_c3_seq1,comp100787_c3_seq2	682.9	629.45	19	1.91	1.28
comp100788_c0	comp100788_c0_seq1,comp100788_c0_seq2,comp100788_c0_seq3	1776.28	1722.82	338	12.32	8.28
comp100789_c0	comp100789_c0_seq1,comp100789_c0_seq2,comp100789_c0_seq3	2667.52	2614.06	2466	59.18	39.77
comp100790_c2	comp100790_c2_seq1	807	753.54	14	1.17	0.79
comp100790_c3	comp100790_c3_seq1,comp100790_c3_seq2,comp100790_c3_seq3,comp100790_c3_seq4	1143.28	1089.82	47	2.71	1.82
comp100791_c0	comp100791_c0_seq1,comp100791_c0_seq2,comp100791_c0_seq3,comp100791_c0_seq4,comp100791_c0_seq5	3531.31	3477.85	10893.9	196.38	131.99
comp100792_c0	comp100792_c0_seq1,comp100792_c0_seq2,comp100792_c0_seq3,comp100792_c0_seq4,comp100792_c0_seq5	942.59	889.14	13	0.92	0.62
comp100793_c0	comp100793_c0_seq1,comp100793_c0_seq2	752	698.54	22	1.99	1.34
comp100795_c0	comp100795_c0_seq2	567	513.57	14	1.72	1.16
comp100795_c1	comp100795_c1_seq1,comp100795_c1_seq2	1001.98	948.52	97	6.44	4.33
comp100795_c2	comp100795_c2_seq1	902	848.54	6	0.45	0.3
comp100796_c2	comp100796_c2_seq1,comp100796_c2_seq2,comp100796_c2_seq3,comp100796_c2_seq4,comp100796_c2_seq5	1325.75	1272.29	95.01	4.69	3.16
comp100796_c5	comp100796_c5_seq1	565	511.57	5	0.62	0.42
comp100797_c0	comp100797_c0_seq1,comp100797_c0_seq2,comp100797_c0_seq3,comp100797_c0_seq4	3159.74	3106.28	852	17.2	11.56
comp100798_c0	comp100798_c0_seq1,comp100798_c0_seq2,comp100798_c0_seq3,comp100798_c0_seq4,comp100798_c0_seq5	2502.68	2449.22	2105	53.92	36.24
comp100799_c0	comp100799_c0_seq1,comp100799_c0_seq2,comp100799_c0_seq3	1219.25	1165.79	86	4.64	3.12
comp100801_c0	comp100801_c0_seq1,comp100801_c0_seq2,comp100801_c0_seq4,comp100801_c0_seq5	1248.96	1195.5	624.33	32.84	22.08
comp100802_c0	comp100802_c0_seq1	1046	992.54	12	0.76	0.51
comp100802_c1	comp100802_c1_seq1,comp100802_c1_seq2,comp100802_c1_seq3	810.1	756.65	16	1.33	0.9
comp100802_c4	comp100802_c4_seq1	737	683.55	6	0.55	0.37
comp100803_c0	comp100803_c0_seq1,comp100803_c0_seq2	3367.74	3314.28	2138.06	40.45	27.19
comp100804_c0	comp100804_c0_seq1,comp100804_c0_seq2,comp100804_c0_seq3,comp100804_c0_seq4,comp100804_c0_seq5	3267.54	3214.08	267	5.21	3.5
comp100805_c0	comp100805_c0_seq1,comp100805_c0_seq2,comp100805_c0_seq3,comp100805_c0_seq4,comp100805_c0_seq5	1663.34	1609.88	589	22.98	15.45
comp100806_c0	comp100806_c0_seq1	795	741.54	17	1.45	0.97
comp100806_c1	comp100806_c1_seq1,comp100806_c1_seq2,comp100806_c1_seq3,comp100806_c1_seq4,comp100806_c1_seq5	1591.06	1537.6	174.99	7.15	4.81
comp100807_c0	comp100807_c0_seq1	715	661.55	125.17	11.94	8.03
comp100808_c2	comp100808_c2_seq1,comp100808_c2_seq2,comp100808_c2_seq3,comp100808_c2_seq4,comp100808_c2_seq5	851.17	797.72	66	5.22	3.51
comp100809_c0	comp100809_c0_seq2,comp100809_c0_seq4,comp100809_c0_seq5	716.12	662.67	7	0.67	0.45
comp10081_c0	comp10081_c0_seq1	861	807.54	0	0	0
comp100810_c0	comp100810_c0_seq1	1444	1390.54	32	1.45	0.97
comp100810_c1	comp100810_c1_seq1	502	448.59	8	1.13	0.76
comp100811_c0	comp100811_c0_seq1	621	567.56	5	0.56	0.37
comp100811_c2	comp100811_c2_seq1,comp100811_c2_seq2,comp100811_c2_seq3,comp100811_c2_seq5	931.05	877.59	37	2.66	1.79
comp100812_c0	comp100812_c0_seq2,comp100812_c0_seq3,comp100812_c0_seq4,comp100812_c0_seq5	1099.75	1046.3	59	3.55	2.38
comp100813_c0	comp100813_c0_seq1	1749	1695.54	14	0.52	0.35
comp100813_c1	comp100813_c1_seq1,comp100813_c1_seq3	549.39	495.97	4	0.51	0.34
comp100814_c0	comp100814_c0_seq1	2359	2305.54	234	6.37	4.28
comp100815_c1	comp100815_c1_seq1	1395	1341.54	12	0.56	0.38
comp100815_c2	comp100815_c2_seq1,comp100815_c2_seq2,comp100815_c2_seq3,comp100815_c2_seq4,comp100815_c2_seq5	2184.1	2130.64	532.15	15.67	10.54
comp100816_c0	comp100816_c0_seq1	1064	1010.54	50	3.11	2.09
comp100817_c0	comp100817_c0_seq1,comp100817_c0_seq2,comp100817_c0_seq3,comp100817_c0_seq5	802.54	749.08	15.06	1.27	0.85
comp100818_c0	comp100818_c0_seq1,comp100818_c0_seq2	665	611.55	8	0.83	0.56
comp100818_c1	comp100818_c1_seq1	723	669.55	18	1.7	1.14
comp100818_c2	comp100818_c2_seq1,comp100818_c2_seq2,comp100818_c2_seq3,comp100818_c2_seq4	1739.44	1685.98	53.01	1.97	1.33
comp100819_c0	comp100819_c0_seq1,comp100819_c0_seq2,comp100819_c0_seq3,comp100819_c0_seq5	4310.64	4257.18	2894.46	42.61	28.64
comp100820_c0	comp100820_c0_seq1,comp100820_c0_seq2,comp100820_c0_seq3,comp100820_c0_seq5	1945.64	1892.18	534.01	17.72	11.91
comp100821_c0	comp100821_c0_seq1,comp100821_c0_seq2,comp100821_c0_seq3,comp100821_c0_seq4,comp100821_c0_seq5	1518.86	1465.4	18	0.77	0.52
comp100821_c1	comp100821_c1_seq1,comp100821_c1_seq2,comp100821_c1_seq3,comp100821_c1_seq4	1897.31	1843.85	24	0.82	0.55
comp100822_c0	comp100822_c0_seq1	624	570.56	26	2.88	1.94
comp100822_c1	comp100822_c1_seq1	587	533.56	9	1.07	0.72
comp100823_c0	comp100823_c0_seq1	1390	1336.54	3	0.14	0.09
comp100823_c1	comp100823_c1_seq1,comp100823_c1_seq2	592	538.56	1	0.12	0.08
comp100823_c2	comp100823_c2_seq1	565	511.57	16	1.98	1.33
comp100824_c1	comp100824_c1_seq2,comp100824_c1_seq3,comp100824_c1_seq4,comp100824_c1_seq5	2445.05	2391.59	235	6.16	4.14
comp100824_c2	comp100824_c2_seq1	1667	1613.54	63	2.45	1.65
comp100824_c3	comp100824_c3_seq1	821	767.54	15	1.23	0.83
comp100825_c0	comp100825_c0_seq1	1843	1789.54	181	6.35	4.27
comp100826_c0	comp100826_c0_seq1,comp100826_c0_seq2,comp100826_c0_seq3,comp100826_c0_seq5	1670.62	1617.16	865.45	33.61	22.59
comp100827_c0	comp100827_c0_seq1,comp100827_c0_seq2,comp100827_c0_seq3,comp100827_c0_seq4,comp100827_c0_seq5	1024.06	970.6	222	14.4	9.68
comp100828_c0	comp100828_c0_seq1	1631	1577.54	1241.93	49.45	33.24
comp100828_c1	comp100828_c1_seq2,comp100828_c1_seq3,comp100828_c1_seq4,comp100828_c1_seq5	4010.08	3956.62	832.87	13.19	8.87
comp100829_c0	comp100829_c0_seq1,comp100829_c0_seq2	2944	2890.54	77	1.67	1.12
comp100830_c0	comp100830_c0_seq1	1339	1285.54	12	0.59	0.39
comp100831_c0	comp100831_c0_seq2	538	484.58	0	0	0
comp100832_c0	comp100832_c0_seq1,comp100832_c0_seq2,comp100832_c0_seq3,comp100832_c0_seq4	1246.87	1193.42	8	0.42	0.28
comp100833_c0	comp100833_c0_seq1,comp100833_c0_seq2,comp100833_c0_seq3,comp100833_c0_seq4,comp100833_c0_seq5	1098.17	1044.71	214.95	12.95	8.7
comp100834_c3	comp100834_c3_seq1	1037	983.54	4	0.26	0.17
comp100834_c4	comp100834_c4_seq1,comp100834_c4_seq2,comp100834_c4_seq3,comp100834_c4_seq4,comp100834_c4_seq5	1878.69	1825.24	120.02	4.13	2.77
comp100835_c0	comp100835_c0_seq1	1520	1466.54	38	1.63	1.09
comp100835_c1	comp100835_c1_seq1,comp100835_c1_seq2,comp100835_c1_seq3,comp100835_c1_seq5	1648.16	1594.71	85	3.35	2.25
comp100836_c0	comp100836_c0_seq1	959	905.54	9	0.63	0.42
comp100836_c1	comp100836_c1_seq1,comp100836_c1_seq2,comp100836_c1_seq3,comp100836_c1_seq4,comp100836_c1_seq5	922.35	868.89	20	1.45	0.97
comp1008361_c0	comp1008361_c0_seq1	680	626.55	0	0	0
comp100837_c0	comp100837_c0_seq1	1137	1083.54	16	0.93	0.62
comp100837_c1	comp100837_c1_seq2,comp100837_c1_seq3,comp100837_c1_seq4	1758.1	1704.64	120	4.42	2.97
comp100838_c1	comp100838_c1_seq1	787	733.54	11	0.95	0.64
comp100838_c2	comp100838_c2_seq1,comp100838_c2_seq2,comp100838_c2_seq3,comp100838_c2_seq4,comp100838_c2_seq5	921.45	867.99	221.54	16.08	10.81
comp100839_c0	comp100839_c0_seq1	1692	1638.54	162	6.21	4.17
comp100839_c1	comp100839_c1_seq1,comp100839_c1_seq3,comp100839_c1_seq4	832.89	779.43	296.01	23.94	16.09
comp100839_c2	comp100839_c2_seq1,comp100839_c2_seq2	1850.7	1797.24	839.01	29.31	19.7
comp100840_c0	comp100840_c0_seq1,comp100840_c0_seq2,comp100840_c0_seq3,comp100840_c0_seq4,comp100840_c0_seq5	2746.97	2693.52	178	4.15	2.79
comp100841_c0	comp100841_c0_seq1,comp100841_c0_seq2,comp100841_c0_seq3,comp100841_c0_seq4	2391.16	2337.7	95.54	2.56	1.72
comp100842_c0	comp100842_c0_seq1	2073	2019.54	9	0.28	0.19
comp100842_c1	comp100842_c1_seq1	719	665.55	1	0.09	0.06
comp100842_c2	comp100842_c2_seq1,comp100842_c2_seq2,comp100842_c2_seq3,comp100842_c2_seq4	2002.36	1948.9	738	23.77	15.98
comp100843_c0	comp100843_c0_seq1,comp100843_c0_seq2,comp100843_c0_seq3,comp100843_c0_seq5	984	930.54	14	0.95	0.64
comp100844_c0	comp100844_c0_seq1	5141	5087.54	21815.3	268.68	180.59
comp100845_c0	comp100845_c0_seq1,comp100845_c0_seq2,comp100845_c0_seq3,comp100845_c0_seq4,comp100845_c0_seq5	1771.65	1718.19	416.68	15.23	10.24
comp100846_c0	comp100846_c0_seq1,comp100846_c0_seq2,comp100846_c0_seq3,comp100846_c0_seq5	1248.4	1194.94	36	1.89	1.27
comp100847_c0	comp100847_c0_seq1,comp100847_c0_seq2,comp100847_c0_seq3,comp100847_c0_seq4,comp100847_c0_seq5	4209.85	4156.39	2409.73	36.34	24.42
comp100847_c1	comp100847_c1_seq1	613	559.56	1	0.11	0.08
comp100848_c0	comp100848_c0_seq1,comp100848_c0_seq2,comp100848_c0_seq3,comp100848_c0_seq4,comp100848_c0_seq5	1760.38	1706.92	1042.71	38.36	25.79
comp100849_c0	comp100849_c0_seq1,comp100849_c0_seq2,comp100849_c0_seq3,comp100849_c0_seq4,comp100849_c0_seq5	882.7	829.25	26	1.98	1.33
comp100849_c2	comp100849_c2_seq1	500	446.59	7	0.99	0.67
comp100850_c2	comp100850_c2_seq2,comp100850_c2_seq3,comp100850_c2_seq4,comp100850_c2_seq5	1615.26	1561.82	126	5.07	3.41
comp100851_c0	comp100851_c0_seq1	906	852.54	4	0.3	0.2
comp100851_c1	comp100851_c1_seq1	644	590.55	72	7.7	5.18
comp100851_c2	comp100851_c2_seq1,comp100851_c2_seq2,comp100851_c2_seq3,comp100851_c2_seq4,comp100851_c2_seq5	1879.64	1826.18	167.99	5.78	3.88
comp100852_c0	comp100852_c0_seq1,comp100852_c0_seq2,comp100852_c0_seq3	1123.7	1070.25	96	5.64	3.79
comp100852_c1	comp100852_c1_seq1,comp100852_c1_seq2,comp100852_c1_seq3	765.6	712.14	21	1.86	1.25
comp100853_c0	comp100853_c0_seq1,comp100853_c0_seq2	2063.4	2009.94	94	2.94	1.97
comp100853_c1	comp100853_c1_seq1,comp100853_c1_seq2	1156.3	1102.84	58	3.31	2.22
comp100854_c0	comp100854_c0_seq1,comp100854_c0_seq2,comp100854_c0_seq3	1401.97	1348.51	7	0.33	0.22
comp100855_c0	comp100855_c0_seq1,comp100855_c0_seq2	766	712.54	4	0.35	0.24
comp100855_c1	comp100855_c1_seq1,comp100855_c1_seq2,comp100855_c1_seq4	805.66	752.21	20	1.68	1.13
comp100855_c4	comp100855_c4_seq1	1145	1091.54	11	0.63	0.43
comp100855_c5	comp100855_c5_seq1	1278	1224.54	26.01	1.34	0.9
comp100855_c6	comp100855_c6_seq1,comp100855_c6_seq2,comp100855_c6_seq4,comp100855_c6_seq5	1214.6	1161.14	68	3.68	2.48
comp100856_c0	comp100856_c0_seq2	1537	1483.54	19	0.8	0.54
comp100857_c1	comp100857_c1_seq1,comp100857_c1_seq2,comp100857_c1_seq3,comp100857_c1_seq4,comp100857_c1_seq5	1494.9	1441.45	529.81	23.1	15.52
comp100858_c0	comp100858_c0_seq1,comp100858_c0_seq2,comp100858_c0_seq3	988.66	935.2	197.23	13.28	8.93
comp100858_c1	comp100858_c1_seq1	1687	1633.54	3610.97	138.85	93.32
comp100858_c2	comp100858_c2_seq1	1158	1104.54	165	9.4	6.32
comp100859_c0	comp100859_c0_seq1	2321	2267.54	1914	52.97	35.6
comp100859_c1	comp100859_c1_seq1,comp100859_c1_seq2	3522.61	3469.15	1196.04	21.61	14.53
comp100860_c0	comp100860_c0_seq1	2679	2625.54	1158.96	27.69	18.61
comp100861_c0	comp100861_c0_seq1,comp100861_c0_seq2	3562.17	3508.72	812.99	14.53	9.76
comp100862_c0	comp100862_c0_seq1	1902	1848.54	3112.05	105.7	71.05
comp100863_c0	comp100863_c0_seq1,comp100863_c0_seq2,comp100863_c0_seq3	1451.48	1398.02	55	2.47	1.66
comp100864_c0	comp100864_c0_seq1,comp100864_c0_seq2,comp100864_c0_seq3,comp100864_c0_seq4,comp100864_c0_seq5	1071.98	1018.52	131	8.1	5.44
comp100865_c0	comp100865_c0_seq1,comp100865_c0_seq2,comp100865_c0_seq3,comp100865_c0_seq4,comp100865_c0_seq5	1820.18	1766.72	596	21.18	14.24
comp100866_c0	comp100866_c0_seq1,comp100866_c0_seq2,comp100866_c0_seq3	1784.24	1730.78	68.9	2.5	1.68
comp100867_c0	comp100867_c0_seq1	3813	3759.54	22.97	0.38	0.26
comp100868_c0	comp100868_c0_seq1,comp100868_c0_seq2,comp100868_c0_seq3,comp100868_c0_seq4,comp100868_c0_seq5	1455.09	1401.63	463.75	20.79	13.98
comp100868_c1	comp100868_c1_seq1,comp100868_c1_seq2	1191	1137.54	405	22.4	15.05
comp100868_c2	comp100868_c2_seq1	1236	1182.54	834	44.36	29.81
comp100869_c0	comp100869_c0_seq2,comp100869_c0_seq3,comp100869_c0_seq4,comp100869_c0_seq5	1065.58	1012.13	206.1	12.82	8.61
comp100869_c1	comp100869_c1_seq1,comp100869_c1_seq2,comp100869_c1_seq3	516.63	463.21	70	9.57	6.43
comp100869_c3	comp100869_c3_seq1,comp100869_c3_seq2,comp100869_c3_seq3,comp100869_c3_seq4	966.82	913.37	158.11	10.9	7.33
comp100870_c0	comp100870_c0_seq1,comp100870_c0_seq2,comp100870_c0_seq3,comp100870_c0_seq5	1857.31	1803.85	450.98	15.7	10.55
comp100871_c0	comp100871_c0_seq1,comp100871_c0_seq2,comp100871_c0_seq3,comp100871_c0_seq4,comp100871_c0_seq5	1976.07	1922.61	235.94	7.7	5.18
comp100872_c0	comp100872_c0_seq1	1147	1093.54	23	1.32	0.89
comp100873_c0	comp100873_c0_seq1,comp100873_c0_seq2,comp100873_c0_seq3,comp100873_c0_seq4,comp100873_c0_seq5	2819.81	2766.35	756.22	17.15	11.52
comp100873_c1	comp100873_c1_seq4	516	462.58	20	2.74	1.84
comp100873_c2	comp100873_c2_seq1,comp100873_c2_seq2,comp100873_c2_seq3,comp100873_c2_seq4,comp100873_c2_seq5	3861.94	3808.48	770.04	12.67	8.52
comp100873_c3	comp100873_c3_seq1,comp100873_c3_seq2,comp100873_c3_seq3,comp100873_c3_seq4,comp100873_c3_seq5	1144.3	1090.84	202.08	11.66	7.83
comp100874_c0	comp100874_c0_seq1,comp100874_c0_seq2,comp100874_c0_seq3,comp100874_c0_seq4	1254	1200.54	7	0.37	0.25
comp100875_c0	comp100875_c0_seq2,comp100875_c0_seq4,comp100875_c0_seq5	942.01	888.55	54	3.83	2.57
comp100875_c2	comp100875_c2_seq1	532	478.58	24	3.17	2.13
comp100875_c5	comp100875_c5_seq2,comp100875_c5_seq3	1267.63	1214.17	92	4.77	3.2
comp100875_c6	comp100875_c6_seq1	584	530.56	9	1.07	0.72
comp100875_c8	comp100875_c8_seq1,comp100875_c8_seq2,comp100875_c8_seq3,comp100875_c8_seq4,comp100875_c8_seq5	995.57	942.11	99	6.62	4.45
comp100876_c1	comp100876_c1_seq1,comp100876_c1_seq3,comp100876_c1_seq4,comp100876_c1_seq5	811.92	758.46	48	3.99	2.68
comp100877_c0	comp100877_c0_seq1,comp100877_c0_seq2,comp100877_c0_seq3,comp100877_c0_seq4,comp100877_c0_seq5	657.74	604.31	16	1.67	1.12
comp1008777_c0	comp1008777_c0_seq1	510	456.59	0	0	0
comp100878_c0	comp100878_c0_seq1,comp100878_c0_seq2,comp100878_c0_seq3	2627.77	2574.31	416	10.14	6.81
comp100879_c1	comp100879_c1_seq1,comp100879_c1_seq2,comp100879_c1_seq3,comp100879_c1_seq4,comp100879_c1_seq5	2015.71	1962.25	204	6.53	4.39
comp100880_c0	comp100880_c0_seq1	1582	1528.54	838.02	34.44	23.15
comp100881_c0	comp100881_c0_seq1,comp100881_c0_seq2	2253.68	2200.22	90	2.57	1.73
comp100882_c0	comp100882_c0_seq2,comp100882_c0_seq3,comp100882_c0_seq5	1170.19	1116.74	38	2.14	1.44
comp100883_c0	comp100883_c0_seq1,comp100883_c0_seq2,comp100883_c0_seq3,comp100883_c0_seq4,comp100883_c0_seq5	2899.9	2846.44	325.85	7.18	4.83
comp100884_c0	comp100884_c0_seq1,comp100884_c0_seq2,comp100884_c0_seq5	751.5	698.06	41.23	3.73	2.5
comp100885_c0	comp100885_c0_seq2,comp100885_c0_seq4	701.95	648.5	51	4.96	3.34
comp100886_c0	comp100886_c0_seq1,comp100886_c0_seq2	1450.89	1397.43	27.01	1.21	0.82
comp100886_c1	comp100886_c1_seq1,comp100886_c1_seq2,comp100886_c1_seq5	1325.51	1272.06	141	6.97	4.68
comp100887_c0	comp100887_c0_seq1,comp100887_c0_seq2	680.73	627.29	24	2.42	1.62
comp100887_c1	comp100887_c1_seq1	541	487.58	8	1.04	0.7
comp100887_c2	comp100887_c2_seq2,comp100887_c2_seq3,comp100887_c2_seq4,comp100887_c2_seq5	2823.96	2770.5	190.22	4.31	2.89
comp100888_c0	comp100888_c0_seq1,comp100888_c0_seq2,comp100888_c0_seq3,comp100888_c0_seq4,comp100888_c0_seq5	1523.14	1469.68	126.96	5.43	3.65
comp100889_c0	comp100889_c0_seq1,comp100889_c0_seq2	788.76	735.31	23	1.97	1.33
comp100890_c0	comp100890_c0_seq1	588	534.56	0	0	0
comp100890_c1	comp100890_c1_seq1,comp100890_c1_seq2,comp100890_c1_seq3,comp100890_c1_seq4,comp100890_c1_seq5	1181.41	1127.95	36.54	2.04	1.37
comp100890_c2	comp100890_c2_seq1,comp100890_c2_seq2,comp100890_c2_seq3,comp100890_c2_seq4,comp100890_c2_seq5	2346.46	2293	1598	43.73	29.39
comp100890_c3	comp100890_c3_seq1,comp100890_c3_seq2	779.36	725.9	14	1.22	0.82
comp100891_c0	comp100891_c0_seq2,comp100891_c0_seq3,comp100891_c0_seq4	1173.1	1119.64	91	5.11	3.44
comp100891_c2	comp100891_c2_seq1,comp100891_c2_seq3	1045.1	991.64	54	3.43	2.3
comp100892_c0	comp100892_c0_seq1,comp100892_c0_seq2,comp100892_c0_seq3,comp100892_c0_seq4,comp100892_c0_seq5	1502.97	1449.51	62.02	2.69	1.81
comp1008922_c0	comp1008922_c0_seq1	529	475.58	2	0.27	0.18
comp100893_c0	comp100893_c0_seq1,comp100893_c0_seq2,comp100893_c0_seq3,comp100893_c0_seq4,comp100893_c0_seq5	3972.32	3918.86	67	1.07	0.72
comp100894_c2	comp100894_c2_seq1,comp100894_c2_seq2,comp100894_c2_seq3,comp100894_c2_seq4,comp100894_c2_seq5	1807.88	1754.42	290	10.38	6.98
comp100895_c0	comp100895_c0_seq1,comp100895_c0_seq2,comp100895_c0_seq3,comp100895_c0_seq4,comp100895_c0_seq5	1962.02	1908.56	4459.09	146.68	98.59
comp100896_c0	comp100896_c0_seq1,comp100896_c0_seq2,comp100896_c0_seq3,comp100896_c0_seq4,comp100896_c0_seq5	2047.86	1994.4	1119.67	35.24	23.69
comp100897_c0	comp100897_c0_seq1,comp100897_c0_seq2,comp100897_c0_seq3,comp100897_c0_seq4,comp100897_c0_seq5	1572.31	1518.86	119.99	4.96	3.34
comp100897_c2	comp100897_c2_seq1,comp100897_c2_seq2,comp100897_c2_seq3,comp100897_c2_seq4,comp100897_c2_seq5	879.84	826.39	15	1.14	0.77
comp100897_c3	comp100897_c3_seq1,comp100897_c3_seq2	1076.03	1022.59	44	2.71	1.82
comp100898_c0	comp100898_c0_seq2	563	509.57	8	0.99	0.67
comp100898_c2	comp100898_c2_seq1,comp100898_c2_seq2,comp100898_c2_seq3,comp100898_c2_seq4,comp100898_c2_seq5	2261.63	2208.17	44.85	1.27	0.86
comp100899_c0	comp100899_c0_seq1	3080	3026.54	2038	42.23	28.38
comp100899_c1	comp100899_c1_seq1	931	877.54	636.41	45.69	30.71
comp100900_c0	comp100900_c0_seq1	922	868.54	16	1.16	0.78
comp100901_c0	comp100901_c0_seq1	2452	2398.54	50	1.31	0.88
comp100902_c0	comp100902_c0_seq1	1397	1343.54	15	0.7	0.47
comp100902_c1	comp100902_c1_seq1	936	882.54	5	0.36	0.24
comp100902_c2	comp100902_c2_seq1,comp100902_c2_seq2,comp100902_c2_seq3	2203.87	2150.41	37	1.08	0.73
comp100903_c0	comp100903_c0_seq1,comp100903_c0_seq2	556	502.57	32	4.03	2.71
comp100903_c1	comp100903_c1_seq1,comp100903_c1_seq2	1032	978.54	54	3.47	2.34
comp100903_c4	comp100903_c4_seq2,comp100903_c4_seq3	1806.49	1753.03	180	6.45	4.33
comp100904_c0	comp100904_c0_seq1,comp100904_c0_seq2	5120	5066.54	28	0.35	0.23
comp100905_c0	comp100905_c0_seq1,comp100905_c0_seq2	2846	2792.54	14	0.31	0.21
comp100906_c0	comp100906_c0_seq1,comp100906_c0_seq2	1827	1773.54	125.03	4.43	2.98
comp100907_c0	comp100907_c0_seq1,comp100907_c0_seq2	1134.25	1080.79	36.95	2.15	1.45
comp100908_c0	comp100908_c0_seq1	3329	3275.54	1017.89	19.48	13.1
comp1009082_c0	comp1009082_c0_seq1	573	519.57	2	0.24	0.16
comp100909_c0	comp100909_c0_seq1	1691	1637.54	146	5.6	3.76
comp100909_c2	comp100909_c2_seq1,comp100909_c2_seq2,comp100909_c2_seq3,comp100909_c2_seq4,comp100909_c2_seq5	2030.83	1977.37	250.99	7.97	5.36
comp100910_c0	comp100910_c0_seq1,comp100910_c0_seq3,comp100910_c0_seq4,comp100910_c0_seq5	2072.01	2018.55	188	5.85	3.93
comp100911_c0	comp100911_c0_seq1	567	513.57	1	0.12	0.08
comp100911_c3	comp100911_c3_seq1,comp100911_c3_seq2,comp100911_c3_seq3,comp100911_c3_seq4,comp100911_c3_seq5	1934.67	1881.21	168.99	5.64	3.79
comp100911_c4	comp100911_c4_seq1	535	481.58	0	0	0
comp100912_c2	comp100912_c2_seq1,comp100912_c2_seq2,comp100912_c2_seq3,comp100912_c2_seq4,comp100912_c2_seq5	3773.45	3719.99	1217.47	20.52	13.79
comp100912_c3	comp100912_c3_seq1	1121	1067.54	17	1	0.67
comp100913_c0	comp100913_c0_seq1,comp100913_c0_seq2,comp100913_c0_seq4,comp100913_c0_seq5	1160.07	1106.61	51.5	2.93	1.97
comp100913_c2	comp100913_c2_seq1	1442	1388.54	33	1.49	1
comp100913_c4	comp100913_c4_seq1	844	790.54	30	2.39	1.61
comp100914_c0	comp100914_c0_seq1,comp100914_c0_seq2,comp100914_c0_seq3,comp100914_c0_seq4,comp100914_c0_seq5	2050.87	1997.41	159.27	5.01	3.36
comp100914_c1	comp100914_c1_seq1	934	880.54	22	1.57	1.06
comp100914_c2	comp100914_c2_seq1,comp100914_c2_seq2,comp100914_c2_seq3,comp100914_c2_seq4,comp100914_c2_seq5	960.79	907.35	25	1.74	1.17
comp100914_c3	comp100914_c3_seq1,comp100914_c3_seq2	1109	1055.54	10	0.6	0.4
comp100914_c4	comp100914_c4_seq1	1525	1471.54	38	1.62	1.09
comp100914_c5	comp100914_c5_seq1,comp100914_c5_seq2,comp100914_c5_seq3,comp100914_c5_seq5	1099.65	1046.21	86.11	5.18	3.48
comp100915_c1	comp100915_c1_seq1,comp100915_c1_seq2,comp100915_c1_seq3,comp100915_c1_seq4,comp100915_c1_seq5	845.01	791.57	69.53	5.54	3.72
comp100916_c0	comp100916_c0_seq1,comp100916_c0_seq2,comp100916_c0_seq3,comp100916_c0_seq4,comp100916_c0_seq5	1114.64	1061.18	33	1.96	1.32
comp100916_c1	comp100916_c1_seq1	996	942.54	10	0.67	0.45
comp100917_c0	comp100917_c0_seq1,comp100917_c0_seq2,comp100917_c0_seq3,comp100917_c0_seq4,comp100917_c0_seq5	2238.5	2185.05	853.93	24.53	16.48
comp100918_c1	comp100918_c1_seq1	587	533.56	1	0.12	0.08
comp100918_c5	comp100918_c5_seq1,comp100918_c5_seq2,comp100918_c5_seq3,comp100918_c5_seq5	712.71	659.26	37.08	3.55	2.39
comp100919_c0	comp100919_c0_seq1,comp100919_c0_seq2,comp100919_c0_seq3,comp100919_c0_seq4	2361.76	2308.3	2618.13	71.17	47.83
comp100920_c0	comp100920_c0_seq1,comp100920_c0_seq2,comp100920_c0_seq3,comp100920_c0_seq4,comp100920_c0_seq5	2217.56	2164.1	136	3.94	2.65
comp100921_c0	comp100921_c0_seq1,comp100921_c0_seq2,comp100921_c0_seq3,comp100921_c0_seq4	1361.68	1308.22	128.02	6.15	4.13
comp100921_c1	comp100921_c1_seq1,comp100921_c1_seq2,comp100921_c1_seq3	754	700.54	5	0.45	0.3
comp100922_c0	comp100922_c0_seq1,comp100922_c0_seq2,comp100922_c0_seq3,comp100922_c0_seq4,comp100922_c0_seq5	1267.16	1213.7	3415.37	176.96	118.94
comp100923_c1	comp100923_c1_seq1,comp100923_c1_seq3,comp100923_c1_seq4,comp100923_c1_seq5	3281.84	3228.38	1096	21.29	14.31
comp100924_c1	comp100924_c1_seq1	1271	1217.54	13	0.67	0.45
comp100925_c0	comp100925_c0_seq1,comp100925_c0_seq2,comp100925_c0_seq3,comp100925_c0_seq4	841.9	788.45	128	10.23	6.88
comp100925_c3	comp100925_c3_seq1	547	493.57	49	6.28	4.22
comp100926_c1	comp100926_c1_seq1,comp100926_c1_seq2,comp100926_c1_seq3,comp100926_c1_seq4,comp100926_c1_seq5	1399.28	1345.83	39.99	1.87	1.26
comp100927_c0	comp100927_c0_seq1,comp100927_c0_seq2,comp100927_c0_seq3,comp100927_c0_seq4,comp100927_c0_seq5	1679.86	1626.4	168.08	6.49	4.36
comp100928_c0	comp100928_c0_seq1,comp100928_c0_seq2,comp100928_c0_seq3,comp100928_c0_seq4,comp100928_c0_seq5	2113.29	2059.83	1430.48	43.59	29.3
comp100929_c0	comp100929_c0_seq2,comp100929_c0_seq3	664.96	611.51	297	30.68	20.62
comp100929_c2	comp100929_c2_seq1	641	587.55	140	15.06	10.12
comp100929_c3	comp100929_c3_seq1,comp100929_c3_seq2,comp100929_c3_seq3,comp100929_c3_seq4	565.53	512.1	10	1.24	0.83
comp100930_c1	comp100930_c1_seq1	504	450.59	14	1.97	1.32
comp100930_c5	comp100930_c5_seq1,comp100930_c5_seq3,comp100930_c5_seq4,comp100930_c5_seq5	994.94	941.48	51	3.41	2.29
comp100931_c0	comp100931_c0_seq1,comp100931_c0_seq2,comp100931_c0_seq3,comp100931_c0_seq4,comp100931_c0_seq5	4879.01	4825.55	6507.42	84.5	56.8
comp100932_c1	comp100932_c1_seq2	1422	1368.54	13	0.6	0.4
comp100932_c2	comp100932_c2_seq1	851	797.54	12.79	1.01	0.68
comp100932_c4	comp100932_c4_seq2,comp100932_c4_seq3	971.6	918.14	18	1.23	0.83
comp100932_c5	comp100932_c5_seq1,comp100932_c5_seq2,comp100932_c5_seq4,comp100932_c5_seq5	1194.08	1140.63	227	12.52	8.41
comp100932_c6	comp100932_c6_seq1,comp100932_c6_seq2	830.94	777.48	31	2.51	1.69
comp100933_c0	comp100933_c0_seq1	1191	1137.54	61.5	3.4	2.29
comp100934_c0	comp100934_c0_seq1,comp100934_c0_seq2,comp100934_c0_seq3,comp100934_c0_seq4,comp100934_c0_seq5	1597.56	1544.1	415.29	16.9	11.36
comp100935_c0	comp100935_c0_seq3	654	600.55	24	2.52	1.7
comp100935_c3	comp100935_c3_seq1,comp100935_c3_seq4	1737	1683.54	51	1.9	1.28
comp1009356_c0	comp1009356_c0_seq1	756	702.54	5	0.45	0.3
comp100936_c0	comp100936_c0_seq1,comp100936_c0_seq2,comp100936_c0_seq3,comp100936_c0_seq4,comp100936_c0_seq5	2809.04	2755.58	81.52	1.86	1.25
comp100937_c0	comp100937_c0_seq1,comp100937_c0_seq2	712.19	658.74	17	1.63	1.09
comp100937_c4	comp100937_c4_seq1,comp100937_c4_seq2,comp100937_c4_seq4,comp100937_c4_seq5	1221	1167.54	15	0.81	0.54
comp100937_c5	comp100937_c5_seq3,comp100937_c5_seq4,comp100937_c5_seq5	1180.46	1127.01	54	3.01	2.03
comp100938_c0	comp100938_c0_seq1,comp100938_c0_seq2,comp100938_c0_seq4,comp100938_c0_seq5	949.54	896.08	4	0.28	0.19
comp100939_c0	comp100939_c0_seq1,comp100939_c0_seq2,comp100939_c0_seq3,comp100939_c0_seq4,comp100939_c0_seq5	1860.75	1807.29	250.13	8.69	5.84
comp1009396_c0	comp1009396_c0_seq1	549	495.57	1	0.13	0.09
comp10094_c0	comp10094_c0_seq1	612	558.56	2	0.23	0.15
comp100940_c0	comp100940_c0_seq1	2671	2617.54	114	2.73	1.84
comp100941_c0	comp100941_c0_seq1,comp100941_c0_seq2,comp100941_c0_seq3	3392.08	3338.62	226	4.24	2.85
comp100941_c1	comp100941_c1_seq2	536	482.58	5	0.66	0.44
comp100942_c0	comp100942_c0_seq1	795	741.54	12	1.02	0.69
comp100943_c0	comp100943_c0_seq1,comp100943_c0_seq2,comp100943_c0_seq3,comp100943_c0_seq4,comp100943_c0_seq5	1246.29	1192.83	70	3.69	2.48
comp100943_c1	comp100943_c1_seq1	756	702.54	47	4.22	2.84
comp100943_c2	comp100943_c2_seq1,comp100943_c2_seq2,comp100943_c2_seq3,comp100943_c2_seq4	2053.6	2000.14	404.04	12.68	8.52
comp100944_c0	comp100944_c0_seq1,comp100944_c0_seq2,comp100944_c0_seq3	922.98	869.53	283.99	20.58	13.83
comp100945_c1	comp100945_c1_seq1	2344	2290.54	1304.93	35.75	24.03
comp100946_c0	comp100946_c0_seq1	2319	2265.54	48	1.33	0.89
comp100947_c0	comp100947_c0_seq3,comp100947_c0_seq4,comp100947_c0_seq5	968.85	915.39	9	0.62	0.42
comp100947_c1	comp100947_c1_seq2,comp100947_c1_seq3,comp100947_c1_seq4,comp100947_c1_seq5	1267.91	1214.46	103.02	5.33	3.59
comp100947_c6	comp100947_c6_seq1,comp100947_c6_seq2	754.06	700.61	18	1.62	1.09
comp100948_c0	comp100948_c0_seq1,comp100948_c0_seq2	1767	1713.54	39	1.43	0.96
comp100950_c0	comp100950_c0_seq1	713	659.55	6	0.57	0.39
comp100950_c1	comp100950_c1_seq1	898	844.54	11	0.82	0.55
comp100951_c0	comp100951_c0_seq1,comp100951_c0_seq2	2048.72	1995.26	477	15.01	10.09
comp100952_c0	comp100952_c0_seq1,comp100952_c0_seq2,comp100952_c0_seq3,comp100952_c0_seq4,comp100952_c0_seq5	1130.85	1077.39	58	3.39	2.28
comp100953_c0	comp100953_c0_seq1,comp100953_c0_seq2,comp100953_c0_seq3	691.73	638.27	12	1.19	0.8
comp100954_c1	comp100954_c1_seq1,comp100954_c1_seq2,comp100954_c1_seq3,comp100954_c1_seq4,comp100954_c1_seq5	914.4	860.94	0	0	0
comp100955_c0	comp100955_c0_seq1,comp100955_c0_seq2,comp100955_c0_seq3,comp100955_c0_seq4,comp100955_c0_seq5	1127.64	1074.19	92.14	5.4	3.63
comp100956_c1	comp100956_c1_seq3,comp100956_c1_seq4	658.7	605.26	24.74	2.58	1.74
comp100957_c0	comp100957_c0_seq1,comp100957_c0_seq2,comp100957_c0_seq3,comp100957_c0_seq4,comp100957_c0_seq5	1252.48	1199.02	110	5.77	3.88
comp100957_c2	comp100957_c2_seq1,comp100957_c2_seq2,comp100957_c2_seq3,comp100957_c2_seq4	1861.81	1808.35	456	15.83	10.64
comp100957_c5	comp100957_c5_seq1	1344	1290.54	6	0.29	0.2
comp100958_c0	comp100958_c0_seq1,comp100958_c0_seq2,comp100958_c0_seq4,comp100958_c0_seq5	1610.32	1556.86	52.46	2.12	1.42
comp100959_c0	comp100959_c0_seq1	2357	2303.54	826.53	22.51	15.13
comp10096_c0	comp10096_c0_seq1	1020	966.54	1	0.07	0.04
comp100960_c0	comp100960_c0_seq1,comp100960_c0_seq2,comp100960_c0_seq3,comp100960_c0_seq4,comp100960_c0_seq5	1335	1281.54	13	0.64	0.43
comp100961_c0	comp100961_c0_seq1,comp100961_c0_seq2,comp100961_c0_seq3,comp100961_c0_seq4,comp100961_c0_seq5	839.08	785.62	25	2.01	1.35
comp100962_c0	comp100962_c0_seq1,comp100962_c0_seq2	1577.05	1523.59	60	2.47	1.66
comp100963_c0	comp100963_c0_seq1,comp100963_c0_seq2,comp100963_c0_seq3,comp100963_c0_seq4,comp100963_c0_seq5	677.42	623.98	229.06	23.18	15.58
comp100964_c0	comp100964_c0_seq1,comp100964_c0_seq3,comp100964_c0_seq4,comp100964_c0_seq5	888.39	834.93	26	1.96	1.32
comp100965_c0	comp100965_c0_seq1,comp100965_c0_seq2,comp100965_c0_seq3,comp100965_c0_seq4,comp100965_c0_seq5	557.19	503.76	32.01	4.02	2.7
comp100966_c1	comp100966_c1_seq1	626	572.56	31	3.42	2.3
comp100966_c2	comp100966_c2_seq1,comp100966_c2_seq2,comp100966_c2_seq3,comp100966_c2_seq4,comp100966_c2_seq5	3498.04	3444.59	165	3	2.02
comp100966_c3	comp100966_c3_seq1,comp100966_c3_seq2,comp100966_c3_seq3,comp100966_c3_seq4,comp100966_c3_seq5	4106.95	4053.49	3419.97	52.88	35.54
comp100967_c0	comp100967_c0_seq1,comp100967_c0_seq2,comp100967_c0_seq3,comp100967_c0_seq4	2490.37	2436.91	240.97	6.2	4.17
comp100968_c0	comp100968_c0_seq1,comp100968_c0_seq2,comp100968_c0_seq3,comp100968_c0_seq4,comp100968_c0_seq5	2979.16	2925.7	2386.06	51.15	34.38
comp100968_c1	comp100968_c1_seq1	1544	1490.54	71	2.99	2.01
comp100968_c2	comp100968_c2_seq1,comp100968_c2_seq2,comp100968_c2_seq3,comp100968_c2_seq4,comp100968_c2_seq5	2783.16	2729.7	6512.74	149.65	100.58
comp100968_c3	comp100968_c3_seq1	1261	1207.54	121	6.3	4.24
comp100969_c0	comp100969_c0_seq1	2148	2094.54	46	1.38	0.93
comp100970_c0	comp100970_c0_seq2,comp100970_c0_seq3,comp100970_c0_seq4,comp100970_c0_seq5	1567.12	1513.66	142	5.89	3.96
comp100971_c0	comp100971_c0_seq1,comp100971_c0_seq2,comp100971_c0_seq3,comp100971_c0_seq4,comp100971_c0_seq5	1229.46	1176	97	5.19	3.49
comp100971_c4	comp100971_c4_seq1	1171	1117.54	4	0.23	0.15
comp100972_c0	comp100972_c0_seq1	846	792.54	61	4.85	3.26
comp100972_c1	comp100972_c1_seq1,comp100972_c1_seq3	1052	998.54	2	0.13	0.08
comp100972_c2	comp100972_c2_seq1	654	600.55	11	1.16	0.78
comp100972_c3	comp100972_c3_seq1	519	465.58	1	0.14	0.09
comp100972_c5	comp100972_c5_seq1,comp100972_c5_seq2	532	478.58	30	3.97	2.67
comp100972_c6	comp100972_c6_seq1,comp100972_c6_seq2,comp100972_c6_seq3,comp100972_c6_seq4,comp100972_c6_seq5	1599.59	1546.14	282.1	11.46	7.7
comp100972_c7	comp100972_c7_seq1	912	858.54	36	2.64	1.78
comp100973_c1	comp100973_c1_seq1,comp100973_c1_seq2,comp100973_c1_seq3,comp100973_c1_seq4,comp100973_c1_seq5	1429.37	1375.91	57	2.6	1.75
comp100973_c2	comp100973_c2_seq1,comp100973_c2_seq2	1488.15	1434.69	46	2.01	1.35
comp100973_c3	comp100973_c3_seq1,comp100973_c3_seq2,comp100973_c3_seq4,comp100973_c3_seq5	1906.34	1852.89	738.69	25.03	16.82
comp100974_c0	comp100974_c0_seq1,comp100974_c0_seq2,comp100974_c0_seq3,comp100974_c0_seq4	1474.45	1420.99	119	5.26	3.54
comp100975_c0	comp100975_c0_seq1,comp100975_c0_seq2,comp100975_c0_seq3,comp100975_c0_seq4,comp100975_c0_seq5	1154.83	1101.37	116.26	6.64	4.46
comp100976_c0	comp100976_c0_seq1,comp100976_c0_seq2,comp100976_c0_seq3,comp100976_c0_seq4,comp100976_c0_seq5	920.47	867.01	7	0.51	0.34
comp100977_c0	comp100977_c0_seq1,comp100977_c0_seq2,comp100977_c0_seq3,comp100977_c0_seq4,comp100977_c0_seq5	743.61	690.16	25	2.29	1.54
comp100977_c1	comp100977_c1_seq1	532	478.58	0	0	0
comp100978_c1	comp100978_c1_seq1,comp100978_c1_seq2,comp100978_c1_seq3,comp100978_c1_seq4,comp100978_c1_seq5	2224.07	2170.61	130	3.76	2.53
comp100978_c2	comp100978_c2_seq1,comp100978_c2_seq2	1057.35	1003.9	29	1.82	1.22
comp100979_c0	comp100979_c0_seq1	2865	2811.54	1429.85	31.9	21.44
comp100980_c0	comp100980_c0_seq1	3343	3289.54	1589.99	30.31	20.37
comp100981_c0	comp100981_c0_seq1	747	693.54	84.02	7.64	5.14
comp100982_c0	comp100982_c0_seq1,comp100982_c0_seq2,comp100982_c0_seq3,comp100982_c0_seq4	1231	1177.54	17	0.91	0.61
comp100983_c0	comp100983_c0_seq1	2079	2025.54	367.06	11.37	7.65
comp100983_c1	comp100983_c1_seq1,comp100983_c1_seq2,comp100983_c1_seq3,comp100983_c1_seq5	2233.05	2179.6	3850.85	110.88	74.52
comp100983_c2	comp100983_c2_seq1,comp100983_c2_seq2,comp100983_c2_seq3,comp100983_c2_seq4,comp100983_c2_seq5	2602.74	2549.28	289	7.11	4.78
comp100983_c3	comp100983_c3_seq1	947	893.54	10	0.7	0.47
comp100983_c4	comp100983_c4_seq1	576	522.57	54	6.54	4.39
comp100984_c1	comp100984_c1_seq1	651	597.55	11	1.16	0.78
comp100984_c2	comp100984_c2_seq1	625	571.56	26	2.88	1.93
comp100984_c3	comp100984_c3_seq1	611	557.56	55	6.24	4.19
comp100984_c5	comp100984_c5_seq2,comp100984_c5_seq4,comp100984_c5_seq5	959.02	905.57	55.63	3.87	2.6
comp100985_c0	comp100985_c0_seq1	1917	1863.54	327	11.02	7.4
comp100986_c2	comp100986_c2_seq1	655	601.55	4.86	0.51	0.34
comp100986_c3	comp100986_c3_seq1,comp100986_c3_seq4,comp100986_c3_seq5	1413.88	1360.42	79	3.65	2.45
comp100987_c1	comp100987_c1_seq1,comp100987_c1_seq2,comp100987_c1_seq3	1020.48	967.02	84.81	5.52	3.71
comp100988_c0	comp100988_c0_seq1,comp100988_c0_seq2,comp100988_c0_seq3,comp100988_c0_seq4,comp100988_c0_seq5	6381.85	6328.39	1013	10.03	6.74
comp100989_c0	comp100989_c0_seq1	7289	7235.54	1150	9.96	6.69
comp1009899_c0	comp1009899_c0_seq1	522	468.58	0	0	0
comp100990_c0	comp100990_c0_seq1,comp100990_c0_seq2	1539	1485.54	98	4.15	2.79
comp100991_c0	comp100991_c0_seq1	929	875.54	1	0.07	0.05
comp100991_c1	comp100991_c1_seq1	1312	1258.54	19	0.95	0.64
comp100991_c2	comp100991_c2_seq1	1833	1779.54	80	2.82	1.9
comp100992_c1	comp100992_c1_seq1,comp100992_c1_seq2	829	775.54	7	0.57	0.38
comp100992_c2	comp100992_c2_seq1,comp100992_c2_seq2,comp100992_c2_seq3,comp100992_c2_seq4,comp100992_c2_seq5	1554.29	1500.83	174	7.28	4.9
comp100993_c0	comp100993_c0_seq1,comp100993_c0_seq2,comp100993_c0_seq3,comp100993_c0_seq4,comp100993_c0_seq5	4303	4249.54	1505.96	22.21	14.93
comp100994_c2	comp100994_c2_seq1,comp100994_c2_seq2,comp100994_c2_seq3,comp100994_c2_seq4,comp100994_c2_seq5	1109.39	1055.93	342.29	20.4	13.71
comp100994_c3	comp100994_c3_seq1	1901	1847.54	9	0.31	0.21
comp100995_c0	comp100995_c0_seq1,comp100995_c0_seq2,comp100995_c0_seq3,comp100995_c0_seq4,comp100995_c0_seq5	1429.91	1376.45	148	6.76	4.54
comp100996_c0	comp100996_c0_seq1	2060	2006.54	0	0	0
comp100996_c1	comp100996_c1_seq1	947	893.54	2	0.14	0.09
comp100996_c2	comp100996_c2_seq1,comp100996_c2_seq2	1607.5	1554.04	0	0	0
comp100997_c1	comp100997_c1_seq1,comp100997_c1_seq2,comp100997_c1_seq3,comp100997_c1_seq4	1269.74	1216.28	17.98	0.93	0.62
comp100998_c0	comp100998_c0_seq1,comp100998_c0_seq2,comp100998_c0_seq4,comp100998_c0_seq5	1410.38	1356.92	166.45	7.71	5.18
comp100999_c0	comp100999_c0_seq1,comp100999_c0_seq2	1056.46	1003	21	1.32	0.89
comp10100_c0	comp10100_c0_seq1	600	546.56	0	0	0
comp101000_c0	comp101000_c0_seq1,comp101000_c0_seq2,comp101000_c0_seq3	1497.39	1443.93	174	7.57	5.09
comp101001_c0	comp101001_c0_seq1	1094	1040.54	1002.24	60.62	40.74
comp101001_c1	comp101001_c1_seq1,comp101001_c1_seq2,comp101001_c1_seq3,comp101001_c1_seq4,comp101001_c1_seq5	1963.45	1909.99	328	10.78	7.25
comp101002_c0	comp101002_c0_seq1,comp101002_c0_seq2,comp101002_c0_seq3,comp101002_c0_seq4,comp101002_c0_seq5	3234	3180.54	1364.32	26.9	18.08
comp101003_c0	comp101003_c0_seq1,comp101003_c0_seq2,comp101003_c0_seq3,comp101003_c0_seq4,comp101003_c0_seq5	1708.63	1655.17	2195.15	83.3	55.99
comp101003_c1	comp101003_c1_seq1,comp101003_c1_seq2	959.46	906	46	3.2	2.15
comp101003_c2	comp101003_c2_seq1	1247	1193.54	0	0	0
comp101003_c3	comp101003_c3_seq1,comp101003_c3_seq2,comp101003_c3_seq3	1373.26	1319.8	99	4.72	3.17
comp101004_c0	comp101004_c0_seq1,comp101004_c0_seq2,comp101004_c0_seq3,comp101004_c0_seq4,comp101004_c0_seq5	1703.79	1650.33	96	3.65	2.46
comp101005_c3	comp101005_c3_seq1	507	453.59	0	0	0
comp101005_c4	comp101005_c4_seq1,comp101005_c4_seq2,comp101005_c4_seq3,comp101005_c4_seq4,comp101005_c4_seq5	1505.33	1451.87	70	3.03	2.04
comp101006_c0	comp101006_c0_seq1,comp101006_c0_seq2,comp101006_c0_seq3,comp101006_c0_seq4,comp101006_c0_seq5	2092.76	2039.31	310.33	9.55	6.42
comp101007_c0	comp101007_c0_seq1,comp101007_c0_seq2,comp101007_c0_seq3,comp101007_c0_seq4,comp101007_c0_seq5	1278.94	1225.48	4531.81	232.53	156.29
comp101009_c0	comp101009_c0_seq1,comp101009_c0_seq2	1598.68	1545.23	192	7.81	5.25
comp101009_c1	comp101009_c1_seq1,comp101009_c1_seq2,comp101009_c1_seq3,comp101009_c1_seq4,comp101009_c1_seq5	1301.42	1247.96	102	5.14	3.45
comp101010_c0	comp101010_c0_seq1,comp101010_c0_seq2,comp101010_c0_seq3,comp101010_c0_seq4,comp101010_c0_seq5	1858.81	1805.35	5239.85	182.24	122.49
comp101011_c0	comp101011_c0_seq1,comp101011_c0_seq2,comp101011_c0_seq3,comp101011_c0_seq4	1407.53	1354.07	593	27.53	18.5
comp101012_c0	comp101012_c0_seq1,comp101012_c0_seq2,comp101012_c0_seq3	709.11	655.67	7	0.67	0.45
comp101013_c1	comp101013_c1_seq1,comp101013_c1_seq2,comp101013_c1_seq3,comp101013_c1_seq4,comp101013_c1_seq5	2186.72	2133.26	11749.5	345.64	232.32
comp101014_c2	comp101014_c2_seq2	2233	2179.54	9	0.26	0.17
comp101015_c0	comp101015_c0_seq1	738	684.55	0	0	0
comp101015_c1	comp101015_c1_seq1	1192	1138.54	0	0	0
comp101015_c2	comp101015_c2_seq1,comp101015_c2_seq2,comp101015_c2_seq3,comp101015_c2_seq4,comp101015_c2_seq5	1610.95	1557.49	339.75	13.7	9.21
comp101015_c3	comp101015_c3_seq1,comp101015_c3_seq2,comp101015_c3_seq3	780.51	727.06	3	0.26	0.17
comp101015_c4	comp101015_c4_seq1	983	929.54	0	0	0
comp101016_c2	comp101016_c2_seq2,comp101016_c2_seq3,comp101016_c2_seq4	702.34	648.9	71	6.91	4.64
comp101016_c3	comp101016_c3_seq1	718	664.55	8	0.76	0.51
comp101016_c4	comp101016_c4_seq1,comp101016_c4_seq2,comp101016_c4_seq3,comp101016_c4_seq4	884.96	831.52	32	2.43	1.63
comp101017_c0	comp101017_c0_seq1	1120	1066.54	365.83	21.58	14.51
comp101017_c1	comp101017_c1_seq1,comp101017_c1_seq2,comp101017_c1_seq3,comp101017_c1_seq4	1317.7	1264.24	1154	57.39	38.57
comp101019_c0	comp101019_c0_seq1,comp101019_c0_seq2	1604.51	1551.05	17	0.69	0.46
comp101020_c0	comp101020_c0_seq1	1601	1547.54	17	0.69	0.46
comp101020_c1	comp101020_c1_seq1	864	810.54	6	0.47	0.31
comp101021_c0	comp101021_c0_seq2,comp101021_c0_seq3	914	860.54	26	1.9	1.28
comp101022_c0	comp101022_c0_seq1,comp101022_c0_seq2,comp101022_c0_seq3,comp101022_c0_seq4	3483.13	3429.67	133.28	2.44	1.64
comp101023_c0	comp101023_c0_seq1,comp101023_c0_seq2,comp101023_c0_seq5	1228.82	1175.36	170.01	9.1	6.11
comp101023_c1	comp101023_c1_seq1	1456	1402.54	47	2.11	1.42
comp101023_c2	comp101023_c2_seq1,comp101023_c2_seq2,comp101023_c2_seq3	918.9	865.44	10	0.73	0.49
comp101023_c5	comp101023_c5_seq1,comp101023_c5_seq2,comp101023_c5_seq3	1395.75	1342.29	12	0.56	0.38
comp101024_c0	comp101024_c0_seq2,comp101024_c0_seq3,comp101024_c0_seq4	804.45	751	4	0.34	0.23
comp101025_c0	comp101025_c0_seq1,comp101025_c0_seq2,comp101025_c0_seq3,comp101025_c0_seq4,comp101025_c0_seq5	2128.51	2075.05	355	10.74	7.22
comp101025_c1	comp101025_c1_seq1,comp101025_c1_seq2,comp101025_c1_seq3,comp101025_c1_seq5	2675.29	2621.83	1001	23.95	16.1
comp101026_c0	comp101026_c0_seq1,comp101026_c0_seq2,comp101026_c0_seq3,comp101026_c0_seq4,comp101026_c0_seq5	1003.13	949.67	69	4.57	3.07
comp101027_c1	comp101027_c1_seq1,comp101027_c1_seq2,comp101027_c1_seq3,comp101027_c1_seq4,comp101027_c1_seq5	1925.36	1871.9	300	10.06	6.76
comp101028_c0	comp101028_c0_seq1,comp101028_c0_seq2,comp101028_c0_seq3,comp101028_c0_seq4,comp101028_c0_seq5	2702.07	2648.61	2083.13	49.33	33.16
comp101028_c2	comp101028_c2_seq1,comp101028_c2_seq2	1762.16	1708.7	691.03	25.4	17.07
comp101028_c3	comp101028_c3_seq2,comp101028_c3_seq3,comp101028_c3_seq4,comp101028_c3_seq5	1159.08	1105.62	1115.31	63.47	42.66
comp101029_c0	comp101029_c0_seq1,comp101029_c0_seq2,comp101029_c0_seq3,comp101029_c0_seq4,comp101029_c0_seq5	1812.03	1758.57	44.04	1.57	1.06
comp101030_c1	comp101030_c1_seq1,comp101030_c1_seq2,comp101030_c1_seq3,comp101030_c1_seq4,comp101030_c1_seq5	2032.14	1978.68	200.99	6.38	4.29
comp101030_c2	comp101030_c2_seq1	1164	1110.54	4	0.23	0.15
comp101031_c0	comp101031_c0_seq1	2175	2121.54	161	4.76	3.2
comp101032_c0	comp101032_c0_seq1	1159	1105.54	31	1.76	1.19
comp101033_c0	comp101033_c0_seq1,comp101033_c0_seq2,comp101033_c0_seq3,comp101033_c0_seq4,comp101033_c0_seq5	1935.25	1881.79	3897.62	130.04	87.4
comp101033_c1	comp101033_c1_seq1,comp101033_c1_seq2	3953.19	3899.73	209.03	3.36	2.26
comp101033_c2	comp101033_c2_seq1	591	537.56	50	5.88	3.95
comp101034_c0	comp101034_c0_seq1,comp101034_c0_seq2,comp101034_c0_seq3,comp101034_c0_seq4	2286.39	2232.93	2560.8	71.97	48.37
comp101035_c1	comp101035_c1_seq1,comp101035_c1_seq2,comp101035_c1_seq3,comp101035_c1_seq4,comp101035_c1_seq5	1773.07	1719.61	1011.45	36.94	24.83
comp101036_c0	comp101036_c0_seq1,comp101036_c0_seq2,comp101036_c0_seq3	4666.28	4612.82	692.02	9.4	6.32
comp101037_c0	comp101037_c0_seq1,comp101037_c0_seq2,comp101037_c0_seq3,comp101037_c0_seq4,comp101037_c0_seq5	1326.32	1272.87	284.78	14.07	9.45
comp101038_c0	comp101038_c0_seq1	627	573.56	2	0.22	0.15
comp101038_c2	comp101038_c2_seq1,comp101038_c2_seq2,comp101038_c2_seq3,comp101038_c2_seq4,comp101038_c2_seq5	656.57	603.13	71	7.44	5
comp101039_c0	comp101039_c0_seq1,comp101039_c0_seq2,comp101039_c0_seq3,comp101039_c0_seq5	808.18	754.73	27	2.26	1.52
comp101039_c2	comp101039_c2_seq2,comp101039_c2_seq3	693	639.55	14	1.38	0.93
comp10104_c0	comp10104_c0_seq1	529	475.58	0	0	0
comp101040_c1	comp101040_c1_seq1,comp101040_c1_seq2	1198.88	1145.42	18	0.99	0.66
comp101041_c1	comp101041_c1_seq1,comp101041_c1_seq2,comp101041_c1_seq3,comp101041_c1_seq4,comp101041_c1_seq5	3094.94	3041.48	868.15	17.9	12.03
comp101042_c0	comp101042_c0_seq1	1695	1641.54	30	1.15	0.77
comp101042_c1	comp101042_c1_seq1,comp101042_c1_seq2,comp101042_c1_seq3,comp101042_c1_seq4,comp101042_c1_seq5	1180.8	1127.34	27	1.51	1.01
comp101042_c2	comp101042_c2_seq3,comp101042_c2_seq5	2532.59	2479.13	14	0.35	0.24
comp101043_c0	comp101043_c0_seq1	579	525.57	5	0.6	0.4
comp101043_c1	comp101043_c1_seq1,comp101043_c1_seq2,comp101043_c1_seq3,comp101043_c1_seq4,comp101043_c1_seq5	1640.82	1587.36	1220.25	48.29	32.46
comp101044_c0	comp101044_c0_seq1,comp101044_c0_seq2,comp101044_c0_seq3,comp101044_c0_seq4,comp101044_c0_seq5	2328.24	2274.78	279.42	7.71	5.18
comp101044_c2	comp101044_c2_seq1	1344	1290.54	76	3.7	2.49
comp101044_c3	comp101044_c3_seq1	1245	1191.54	732.35	38.66	25.98
comp101045_c0	comp101045_c0_seq1,comp101045_c0_seq2,comp101045_c0_seq3,comp101045_c0_seq4,comp101045_c0_seq5	1514.77	1461.31	27.84	1.2	0.8
comp101046_c2	comp101046_c2_seq1,comp101046_c2_seq2,comp101046_c2_seq3,comp101046_c2_seq4,comp101046_c2_seq5	1523.74	1470.28	483	20.64	13.87
comp101046_c4	comp101046_c4_seq1	1969	1915.54	49	1.61	1.08
comp101047_c0	comp101047_c0_seq1,comp101047_c0_seq2,comp101047_c0_seq3,comp101047_c0_seq4,comp101047_c0_seq5	1060.75	1007.29	86	5.37	3.61
comp101048_c0	comp101048_c0_seq1,comp101048_c0_seq2,comp101048_c0_seq3,comp101048_c0_seq4	1830.07	1776.61	380	13.43	9.03
comp101049_c1	comp101049_c1_seq1,comp101049_c1_seq3,comp101049_c1_seq5	782.27	728.82	22	1.9	1.28
comp101050_c0	comp101050_c0_seq1	834	780.54	91	7.35	4.94
comp101050_c1	comp101050_c1_seq1	547	493.57	4	0.51	0.34
comp101050_c2	comp101050_c2_seq1,comp101050_c2_seq2,comp101050_c2_seq3,comp101050_c2_seq4,comp101050_c2_seq5	1947.03	1893.58	262	8.69	5.84
comp101051_c1	comp101051_c1_seq1,comp101051_c1_seq4	2245	2191.54	23	0.66	0.44
comp101051_c3	comp101051_c3_seq1	536	482.58	47.97	6.29	4.23
comp101051_c4	comp101051_c4_seq1,comp101051_c4_seq2	1342.17	1288.71	319	15.56	10.46
comp101052_c0	comp101052_c0_seq1,comp101052_c0_seq2	3028	2974.54	5353.32	112.86	75.86
comp101053_c0	comp101053_c0_seq1,comp101053_c0_seq3	1572	1518.54	11	0.46	0.31
comp101054_c0	comp101054_c0_seq1,comp101054_c0_seq2,comp101054_c0_seq3,comp101054_c0_seq4,comp101054_c0_seq5	1834.51	1781.05	342.01	12.06	8.1
comp101055_c2	comp101055_c2_seq1	1064	1010.54	4	0.25	0.17
comp101055_c3	comp101055_c3_seq1,comp101055_c3_seq2,comp101055_c3_seq3,comp101055_c3_seq4	1424.16	1370.71	77	3.53	2.37
comp101056_c0	comp101056_c0_seq1,comp101056_c0_seq2,comp101056_c0_seq3,comp101056_c0_seq4	1173.27	1119.81	232	13.03	8.76
comp101058_c0	comp101058_c0_seq1,comp101058_c0_seq2,comp101058_c0_seq4,comp101058_c0_seq5	1418.73	1365.27	185	8.52	5.72
comp101059_c1	comp101059_c1_seq1,comp101059_c1_seq2,comp101059_c1_seq5	701.25	647.8	2	0.19	0.13
comp10106_c0	comp10106_c0_seq1	822	768.54	2	0.16	0.11
comp101060_c0	comp101060_c0_seq1,comp101060_c0_seq2,comp101060_c0_seq3,comp101060_c0_seq4,comp101060_c0_seq5	1735.16	1681.7	1664.56	62.16	41.78
comp101061_c0	comp101061_c0_seq1,comp101061_c0_seq3,comp101061_c0_seq4,comp101061_c0_seq5	648.97	595.53	49	5.2	3.49
comp101062_c0	comp101062_c0_seq1,comp101062_c0_seq2,comp101062_c0_seq3,comp101062_c0_seq4,comp101062_c0_seq5	2571.79	2518.33	574.93	14.32	9.63
comp101063_c0	comp101063_c0_seq1,comp101063_c0_seq2,comp101063_c0_seq3,comp101063_c0_seq4	577.23	523.79	20	2.42	1.62
comp101064_c0	comp101064_c0_seq1,comp101064_c0_seq2,comp101064_c0_seq3,comp101064_c0_seq4,comp101064_c0_seq5	691.98	638.54	83	8.21	5.52
comp101065_c0	comp101065_c0_seq1,comp101065_c0_seq2,comp101065_c0_seq3,comp101065_c0_seq4,comp101065_c0_seq5	1926.09	1872.63	143	4.79	3.22
comp101066_c0	comp101066_c0_seq1,comp101066_c0_seq2,comp101066_c0_seq3,comp101066_c0_seq4,comp101066_c0_seq5	1514.15	1460.69	101	4.34	2.92
comp101067_c0	comp101067_c0_seq1	2874	2820.54	1818.99	40.45	27.19
comp101068_c0	comp101068_c0_seq1	2359	2305.54	156	4.25	2.85
comp101069_c0	comp101069_c0_seq1,comp101069_c0_seq2,comp101069_c0_seq3,comp101069_c0_seq4	3008.46	2955	202	4.29	2.88
comp101070_c0	comp101070_c0_seq1,comp101070_c0_seq2,comp101070_c0_seq4,comp101070_c0_seq5	1526.51	1473.05	68	2.9	1.95
comp101071_c0	comp101071_c0_seq1,comp101071_c0_seq2	3290.77	3237.31	2297.06	44.49	29.9
comp101072_c0	comp101072_c0_seq2,comp101072_c0_seq4,comp101072_c0_seq5	798.91	745.46	23	1.95	1.31
comp101072_c1	comp101072_c1_seq1	524	470.58	5	0.67	0.45
comp101072_c2	comp101072_c2_seq1,comp101072_c2_seq2	2294	2240.54	1	0.03	0.02
comp101072_c4	comp101072_c4_seq1	577	523.57	2	0.24	0.16
comp101072_c5	comp101072_c5_seq1,comp101072_c5_seq2,comp101072_c5_seq3,comp101072_c5_seq4,comp101072_c5_seq5	3393.46	3340	92	1.73	1.16
comp101073_c0	comp101073_c0_seq1,comp101073_c0_seq2,comp101073_c0_seq3,comp101073_c0_seq4	2638.27	2584.81	124	3.01	2.02
comp101074_c0	comp101074_c0_seq1	1828	1774.54	30	1.06	0.71
comp101075_c0	comp101075_c0_seq1,comp101075_c0_seq2,comp101075_c0_seq3,comp101075_c0_seq5	757.43	703.98	69.29	6.21	4.17
comp101076_c0	comp101076_c0_seq1	604	550.56	1	0.11	0.08
comp101076_c1	comp101076_c1_seq1,comp101076_c1_seq2,comp101076_c1_seq3,comp101076_c1_seq4,comp101076_c1_seq5	1009.99	956.53	32	2.11	1.42
comp101077_c0	comp101077_c0_seq1	1095	1041.54	13.8	0.83	0.56
comp101078_c2	comp101078_c2_seq1,comp101078_c2_seq2,comp101078_c2_seq3,comp101078_c2_seq4	2444.8	2391.34	542.52	14.23	9.57
comp101078_c3	comp101078_c3_seq1,comp101078_c3_seq2,comp101078_c3_seq3,comp101078_c3_seq4,comp101078_c3_seq5	2293.99	2240.53	363.95	10.19	6.85
comp101079_c1	comp101079_c1_seq1	524	470.58	1	0.13	0.09
comp101079_c2	comp101079_c2_seq1,comp101079_c2_seq2,comp101079_c2_seq3,comp101079_c2_seq5	1636.81	1583.35	74	2.94	1.97
comp101080_c0	comp101080_c0_seq1,comp101080_c0_seq2,comp101080_c0_seq3,comp101080_c0_seq4,comp101080_c0_seq5	1193.56	1140.1	26	1.43	0.96
comp101081_c0	comp101081_c0_seq1,comp101081_c0_seq2,comp101081_c0_seq3,comp101081_c0_seq4,comp101081_c0_seq5	2329.1	2275.64	20938	577.35	388.06
comp101082_c0	comp101082_c0_seq1,comp101082_c0_seq2,comp101082_c0_seq3,comp101082_c0_seq4,comp101082_c0_seq5	1288.71	1235.25	29	1.48	0.99
comp101083_c0	comp101083_c0_seq1,comp101083_c0_seq2,comp101083_c0_seq3,comp101083_c0_seq4,comp101083_c0_seq5	1631.12	1577.66	328	13.06	8.78
comp101084_c0	comp101084_c0_seq2,comp101084_c0_seq3,comp101084_c0_seq4	555.19	501.76	24	3.03	2.03
comp101085_c0	comp101085_c0_seq1,comp101085_c0_seq2	2583.48	2530.02	263	6.52	4.38
comp101085_c1	comp101085_c1_seq1,comp101085_c1_seq2,comp101085_c1_seq3,comp101085_c1_seq4,comp101085_c1_seq5	967.88	914.45	272.38	18.76	12.61
comp101086_c1	comp101086_c1_seq1,comp101086_c1_seq2,comp101086_c1_seq3,comp101086_c1_seq4,comp101086_c1_seq5	1032.08	978.63	295.5	19.01	12.78
comp101087_c1	comp101087_c1_seq1	901	847.54	7	0.52	0.35
comp101087_c2	comp101087_c2_seq1	1743	1689.54	1609.74	59.84	40.22
comp101087_c3	comp101087_c3_seq1,comp101087_c3_seq2,comp101087_c3_seq3,comp101087_c3_seq4,comp101087_c3_seq5	1715.76	1662.3	5005.51	189.12	127.12
comp101087_c4	comp101087_c4_seq1,comp101087_c4_seq2,comp101087_c4_seq3,comp101087_c4_seq4,comp101087_c4_seq5	3420.01	3366.55	240.93	4.49	3.02
comp101088_c0	comp101088_c0_seq1	1687	1633.54	37	1.42	0.96
comp101089_c1	comp101089_c1_seq3,comp101089_c1_seq4,comp101089_c1_seq5	590.74	537.31	28	3.3	2.21
comp101089_c2	comp101089_c2_seq1	514	460.58	0	0	0
comp101089_c4	comp101089_c4_seq1	552	498.57	6	0.76	0.51
comp101089_c5	comp101089_c5_seq1,comp101089_c5_seq2,comp101089_c5_seq3,comp101089_c5_seq4,comp101089_c5_seq5	1459.82	1406.36	1991.14	88.98	59.81
comp101090_c0	comp101090_c0_seq1	1332	1278.54	13	0.64	0.43
comp101091_c0	comp101091_c0_seq1,comp101091_c0_seq2,comp101091_c0_seq3,comp101091_c0_seq4,comp101091_c0_seq5	1189.61	1136.15	293	16.22	10.9
comp101092_c0	comp101092_c0_seq1,comp101092_c0_seq2,comp101092_c0_seq3,comp101092_c0_seq4,comp101092_c0_seq5	4110.58	4057.13	74	1.14	0.77
comp101093_c0	comp101093_c0_seq1,comp101093_c0_seq2,comp101093_c0_seq3,comp101093_c0_seq4,comp101093_c0_seq5	1532.59	1479.13	2189.9	93.03	62.53
comp101093_c1	comp101093_c1_seq1	1433	1379.54	5375.9	244.93	164.62
comp101094_c0	comp101094_c0_seq1	2252	2198.54	453.54	12.95	8.7
comp101095_c0	comp101095_c0_seq1,comp101095_c0_seq2,comp101095_c0_seq4,comp101095_c0_seq5	1741.68	1688.22	354.57	13.19	8.87
comp101097_c1	comp101097_c1_seq1,comp101097_c1_seq2,comp101097_c1_seq3,comp101097_c1_seq4,comp101097_c1_seq5	990.07	936.61	42	2.82	1.9
comp101098_c0	comp101098_c0_seq1,comp101098_c0_seq2,comp101098_c0_seq3,comp101098_c0_seq4,comp101098_c0_seq5	2386.59	2333.13	899.26	24.18	16.25
comp101099_c0	comp101099_c0_seq1,comp101099_c0_seq3,comp101099_c0_seq4,comp101099_c0_seq5	2119.62	2066.16	66.96	2.03	1.37
comp101100_c0	comp101100_c0_seq1,comp101100_c0_seq3,comp101100_c0_seq4,comp101100_c0_seq5	1932.92	1879.46	124	4.14	2.78
comp101101_c0	comp101101_c0_seq1,comp101101_c0_seq2,comp101101_c0_seq3,comp101101_c0_seq4,comp101101_c0_seq5	3351.59	3298.13	237.99	4.52	3.04
comp101102_c0	comp101102_c0_seq1,comp101102_c0_seq2	2135	2081.54	40	1.21	0.81
comp101103_c2	comp101103_c2_seq1	773	719.54	28	2.45	1.65
comp101103_c3	comp101103_c3_seq1,comp101103_c3_seq2,comp101103_c3_seq3,comp101103_c3_seq4,comp101103_c3_seq5	533.61	480.19	8	1.05	0.71
comp101103_c4	comp101103_c4_seq1,comp101103_c4_seq2	738.5	685.05	0	0	0
comp101104_c0	comp101104_c0_seq1	1231	1177.54	2327.21	124.3	83.55
comp101104_c1	comp101104_c1_seq1,comp101104_c1_seq2,comp101104_c1_seq3,comp101104_c1_seq4	1297.26	1243.8	5542.41	280.19	188.33
comp101105_c0	comp101105_c0_seq1,comp101105_c0_seq2,comp101105_c0_seq3,comp101105_c0_seq4,comp101105_c0_seq5	1120.82	1067.36	24	1.41	0.95
comp101106_c1	comp101106_c1_seq1,comp101106_c1_seq2,comp101106_c1_seq3	2305.2	2251.74	22	0.61	0.41
comp101106_c3	comp101106_c3_seq1	1069	1015.54	11	0.68	0.46
comp101107_c0	comp101107_c0_seq1,comp101107_c0_seq2,comp101107_c0_seq4,comp101107_c0_seq5	823.25	769.79	49	4.01	2.7
comp101108_c0	comp101108_c0_seq2,comp101108_c0_seq3,comp101108_c0_seq4	1749.21	1695.75	308.49	11.42	7.68
comp101109_c0	comp101109_c0_seq1	3909	3855.54	23	0.37	0.25
comp101110_c0	comp101110_c0_seq1	1279	1225.54	8	0.41	0.28
comp101110_c2	comp101110_c2_seq1,comp101110_c2_seq2,comp101110_c2_seq3,comp101110_c2_seq4,comp101110_c2_seq5	3249.88	3196.42	2437.14	47.81	32.13
comp101111_c0	comp101111_c0_seq1	1119	1065.54	37	2.19	1.47
comp101111_c1	comp101111_c1_seq1,comp101111_c1_seq3,comp101111_c1_seq4,comp101111_c1_seq5	896.77	843.31	46	3.44	2.31
comp101112_c0	comp101112_c0_seq1,comp101112_c0_seq2,comp101112_c0_seq3,comp101112_c0_seq4,comp101112_c0_seq5	1905.01	1851.56	132	4.48	3.01
comp101113_c0	comp101113_c0_seq1,comp101113_c0_seq3,comp101113_c0_seq4	986.31	932.85	98	6.62	4.45
comp101114_c0	comp101114_c0_seq3,comp101114_c0_seq4,comp101114_c0_seq5	981.19	927.74	18	1.22	0.82
comp101114_c1	comp101114_c1_seq1	643	589.55	4	0.43	0.29
comp101115_c0	comp101115_c0_seq1,comp101115_c0_seq2,comp101115_c0_seq3,comp101115_c0_seq4	1322.23	1268.77	75.02	3.72	2.5
comp101116_c1	comp101116_c1_seq1,comp101116_c1_seq2,comp101116_c1_seq3,comp101116_c1_seq4	2075.2	2021.75	73	2.27	1.52
comp101117_c1	comp101117_c1_seq1,comp101117_c1_seq2,comp101117_c1_seq3	1050	996.54	20	1.26	0.85
comp101118_c0	comp101118_c0_seq1,comp101118_c0_seq2,comp101118_c0_seq3,comp101118_c0_seq4,comp101118_c0_seq5	732.54	679.09	8.99	0.84	0.56
comp101119_c0	comp101119_c0_seq1	617	563.56	70	7.85	5.28
comp101119_c1	comp101119_c1_seq1	1372	1318.54	2	0.1	0.06
comp101119_c2	comp101119_c2_seq1,comp101119_c2_seq2,comp101119_c2_seq3,comp101119_c2_seq4	705.34	651.91	223.49	21.64	14.54
comp101119_c4	comp101119_c4_seq1	797	743.54	115	9.75	6.56
comp101120_c0	comp101120_c0_seq1,comp101120_c0_seq2	1081	1027.54	44	2.7	1.81
comp101121_c0	comp101121_c0_seq1,comp101121_c0_seq2,comp101121_c0_seq3,comp101121_c0_seq4,comp101121_c0_seq5	2956.56	2903.1	163.62	3.53	2.38
comp101122_c1	comp101122_c1_seq1	701	647.55	2	0.19	0.13
comp101122_c3	comp101122_c3_seq1,comp101122_c3_seq3,comp101122_c3_seq5	774.97	721.52	70	6.12	4.11
comp101123_c0	comp101123_c0_seq1,comp101123_c0_seq2,comp101123_c0_seq3,comp101123_c0_seq4,comp101123_c0_seq5	1110.18	1056.72	48	2.86	1.92
comp101123_c1	comp101123_c1_seq1	613	559.56	10	1.13	0.76
comp101123_c2	comp101123_c2_seq1,comp101123_c2_seq2,comp101123_c2_seq3	762.84	709.38	19	1.69	1.14
comp101124_c0	comp101124_c0_seq1,comp101124_c0_seq2,comp101124_c0_seq3,comp101124_c0_seq4,comp101124_c0_seq5	1960.42	1906.96	733	24.13	16.22
comp101125_c1	comp101125_c1_seq2,comp101125_c1_seq3,comp101125_c1_seq4,comp101125_c1_seq5	1881.25	1827.79	0	0	0
comp101125_c2	comp101125_c2_seq1,comp101125_c2_seq2,comp101125_c2_seq3	574.33	520.9	0	0	0
comp101126_c0	comp101126_c0_seq1,comp101126_c0_seq2,comp101126_c0_seq3,comp101126_c0_seq4,comp101126_c0_seq5	903.93	850.48	41	3.04	2.04
comp101127_c0	comp101127_c0_seq1,comp101127_c0_seq2	2212	2158.54	58	1.69	1.13
comp101128_c0	comp101128_c0_seq1,comp101128_c0_seq2	3129.68	3076.22	61	1.24	0.84
comp101129_c1	comp101129_c1_seq1,comp101129_c1_seq2,comp101129_c1_seq3,comp101129_c1_seq4,comp101129_c1_seq5	1141.56	1088.1	18	1.04	0.7
comp101130_c0	comp101130_c0_seq1,comp101130_c0_seq2,comp101130_c0_seq3,comp101130_c0_seq4,comp101130_c0_seq5	1503.25	1449.79	25	1.08	0.73
comp101131_c0	comp101131_c0_seq1,comp101131_c0_seq2,comp101131_c0_seq4,comp101131_c0_seq5	1515.63	1462.17	1492.11	64.12	43.1
comp101132_c0	comp101132_c0_seq1,comp101132_c0_seq2,comp101132_c0_seq3,comp101132_c0_seq4,comp101132_c0_seq5	1984.08	1930.62	1554.06	50.53	33.96
comp101132_c1	comp101132_c1_seq1,comp101132_c1_seq2	1087.63	1034.17	146	8.89	5.97
comp101133_c0	comp101133_c0_seq1,comp101133_c0_seq2	1337.11	1283.65	262	12.83	8.63
comp101134_c0	comp101134_c0_seq1,comp101134_c0_seq4,comp101134_c0_seq5	1508.58	1455.12	152	6.56	4.41
comp101135_c0	comp101135_c0_seq1,comp101135_c0_seq2,comp101135_c0_seq3,comp101135_c0_seq4,comp101135_c0_seq5	1495.21	1441.75	49	2.14	1.44
comp101135_c1	comp101135_c1_seq1,comp101135_c1_seq2,comp101135_c1_seq3,comp101135_c1_seq5	1281.6	1228.15	77	3.94	2.65
comp101136_c0	comp101136_c0_seq1,comp101136_c0_seq2,comp101136_c0_seq3,comp101136_c0_seq4,comp101136_c0_seq5	807.22	753.77	266	22.25	14.96
comp101136_c1	comp101136_c1_seq2	667	613.55	0	0	0
comp101137_c0	comp101137_c0_seq2,comp101137_c0_seq3,comp101137_c0_seq4	658	604.55	40.06	4.19	2.81
comp101138_c0	comp101138_c0_seq1,comp101138_c0_seq2,comp101138_c0_seq3,comp101138_c0_seq5	1337.71	1284.25	73.17	3.58	2.41
comp101138_c1	comp101138_c1_seq1,comp101138_c1_seq2	1639.3	1585.85	18	0.71	0.48
comp101139_c0	comp101139_c0_seq1	2995	2941.54	1411.33	30.09	20.22
comp101140_c0	comp101140_c0_seq1,comp101140_c0_seq2,comp101140_c0_seq3,comp101140_c0_seq4,comp101140_c0_seq5	804.53	751.08	29.01	2.44	1.64
comp101141_c0	comp101141_c0_seq1,comp101141_c0_seq2,comp101141_c0_seq3,comp101141_c0_seq4,comp101141_c0_seq5	2702.13	2648.67	292	6.92	4.65
comp101142_c0	comp101142_c0_seq1,comp101142_c0_seq2,comp101142_c0_seq3,comp101142_c0_seq4,comp101142_c0_seq5	2490.48	2437.02	186.97	4.81	3.24
comp101143_c0	comp101143_c0_seq1	510	456.59	10	1.39	0.93
comp101143_c1	comp101143_c1_seq1	607	553.56	59	6.74	4.53
comp101143_c2	comp101143_c2_seq1,comp101143_c2_seq2,comp101143_c2_seq3,comp101143_c2_seq4,comp101143_c2_seq5	745.14	691.69	40	3.65	2.45
comp101143_c3	comp101143_c3_seq1	553	499.57	1	0.13	0.09
comp101144_c0	comp101144_c0_seq1,comp101144_c0_seq3,comp101144_c0_seq4,comp101144_c0_seq5	1981.71	1928.25	21	0.68	0.46
comp1011449_c0	comp1011449_c0_seq1	507	453.59	2	0.28	0.19
comp101145_c0	comp101145_c0_seq1,comp101145_c0_seq2,comp101145_c0_seq3,comp101145_c0_seq4,comp101145_c0_seq5	2541.08	2487.62	183.24	4.62	3.11
comp101145_c2	comp101145_c2_seq2,comp101145_c2_seq5	544.07	490.64	4	0.52	0.35
comp101145_c3	comp101145_c3_seq1	581	527.57	4	0.48	0.32
comp101145_c4	comp101145_c4_seq1,comp101145_c4_seq2,comp101145_c4_seq4,comp101145_c4_seq5	704.61	651.16	12	1.16	0.78
comp101145_c5	comp101145_c5_seq1	536	482.58	8	1.05	0.71
comp101146_c0	comp101146_c0_seq1,comp101146_c0_seq2,comp101146_c0_seq3,comp101146_c0_seq4,comp101146_c0_seq5	3654.56	3601.1	548	9.54	6.41
comp101147_c1	comp101147_c1_seq2,comp101147_c1_seq3,comp101147_c1_seq4,comp101147_c1_seq5	2068.07	2014.61	87	2.71	1.82
comp101148_c0	comp101148_c0_seq1,comp101148_c0_seq2,comp101148_c0_seq3	1536.27	1482.82	40	1.69	1.14
comp101149_c1	comp101149_c1_seq1,comp101149_c1_seq2,comp101149_c1_seq3,comp101149_c1_seq4,comp101149_c1_seq5	1849.81	1796.35	57.96	2.03	1.36
comp101150_c0	comp101150_c0_seq1	708	654.55	0	0	0
comp101150_c1	comp101150_c1_seq1,comp101150_c1_seq2,comp101150_c1_seq3,comp101150_c1_seq4,comp101150_c1_seq5	1929.34	1875.88	194.97	6.53	4.39
comp101150_c2	comp101150_c2_seq1	653	599.55	0	0	0
comp101150_c3	comp101150_c3_seq1,comp101150_c3_seq2,comp101150_c3_seq3,comp101150_c3_seq4,comp101150_c3_seq5	2327.18	2273.72	319.52	8.82	5.93
comp101151_c0	comp101151_c0_seq1	957	903.54	8	0.56	0.37
comp101152_c0	comp101152_c0_seq3,comp101152_c0_seq4,comp101152_c0_seq5	732.33	678.88	0	0	0
comp101153_c0	comp101153_c0_seq1	502	448.59	115	16.24	10.92
comp101153_c1	comp101153_c1_seq1	2571	2517.54	1027.97	25.62	17.22
comp101153_c2	comp101153_c2_seq2,comp101153_c2_seq3,comp101153_c2_seq4,comp101153_c2_seq5	834.9	781.44	70.99	5.73	3.85
comp101153_c3	comp101153_c3_seq1,comp101153_c3_seq3	817.22	763.78	130.62	10.78	7.25
comp101154_c1	comp101154_c1_seq1,comp101154_c1_seq3,comp101154_c1_seq5	1182.77	1129.31	31	1.73	1.16
comp101155_c0	comp101155_c0_seq1,comp101155_c0_seq2,comp101155_c0_seq3,comp101155_c0_seq4	2183.14	2129.68	481	14.17	9.53
comp101155_c1	comp101155_c1_seq2	1156	1102.54	13	0.74	0.5
comp101156_c0	comp101156_c0_seq1,comp101156_c0_seq2,comp101156_c0_seq3,comp101156_c0_seq4,comp101156_c0_seq5	2749.09	2695.63	1846.27	42.96	28.88
comp101157_c0	comp101157_c0_seq1,comp101157_c0_seq2,comp101157_c0_seq3,comp101157_c0_seq5	1484.44	1430.98	169.19	7.43	4.99
comp101158_c1	comp101158_c1_seq1,comp101158_c1_seq2,comp101158_c1_seq3,comp101158_c1_seq4	2857.74	2804.28	200	4.47	3.01
comp101159_c0	comp101159_c0_seq1	552	498.57	10	1.27	0.85
comp101160_c1	comp101160_c1_seq1,comp101160_c1_seq2,comp101160_c1_seq3,comp101160_c1_seq4	1312.45	1258.99	83	4.15	2.79
comp101161_c0	comp101161_c0_seq1	1688	1634.54	263	10.11	6.79
comp101161_c2	comp101161_c2_seq1,comp101161_c2_seq2,comp101161_c2_seq3,comp101161_c2_seq4,comp101161_c2_seq5	2318.76	2265.3	778.61	21.57	14.5
comp101161_c3	comp101161_c3_seq1	596	542.56	59	6.88	4.62
comp101162_c2	comp101162_c2_seq1,comp101162_c2_seq2,comp101162_c2_seq3	1136.86	1083.4	191.89	11.14	7.49
comp101163_c0	comp101163_c0_seq1	529	475.58	6	0.8	0.54
comp101163_c1	comp101163_c1_seq1,comp101163_c1_seq2,comp101163_c1_seq3,comp101163_c1_seq4,comp101163_c1_seq5	1379.02	1325.58	13	0.62	0.41
comp101164_c0	comp101164_c0_seq2,comp101164_c0_seq3,comp101164_c0_seq4,comp101164_c0_seq5	1079.93	1026.47	125	7.66	5.15
comp101164_c1	comp101164_c1_seq1,comp101164_c1_seq3,comp101164_c1_seq4,comp101164_c1_seq5	1304.6	1251.14	67	3.37	2.26
comp101165_c0	comp101165_c0_seq1,comp101165_c0_seq3,comp101165_c0_seq4,comp101165_c0_seq5	803.47	750.02	98	8.24	5.54
comp101165_c1	comp101165_c1_seq1,comp101165_c1_seq2,comp101165_c1_seq3,comp101165_c1_seq4,comp101165_c1_seq5	1969.02	1915.56	1212.56	39.74	26.71
comp101166_c0	comp101166_c0_seq1,comp101166_c0_seq2,comp101166_c0_seq3,comp101166_c0_seq4,comp101166_c0_seq5	3617.32	3563.86	119	2.09	1.41
comp101166_c1	comp101166_c1_seq1	1399	1345.54	272.63	12.74	8.56
comp101167_c0	comp101167_c0_seq1,comp101167_c0_seq2,comp101167_c0_seq3,comp101167_c0_seq4	1723.63	1670.17	1320.46	49.66	33.38
comp101168_c0	comp101168_c0_seq1,comp101168_c0_seq3,comp101168_c0_seq4,comp101168_c0_seq5	1016.12	962.67	97	6.34	4.26
comp101169_c0	comp101169_c0_seq1,comp101169_c0_seq2	1812.08	1758.62	80	2.86	1.92
comp101170_c1	comp101170_c1_seq1	1765	1711.54	116.12	4.26	2.86
comp101170_c3	comp101170_c3_seq1,comp101170_c3_seq2,comp101170_c3_seq3,comp101170_c3_seq4	1271.11	1217.65	34	1.76	1.18
comp101171_c0	comp101171_c0_seq2,comp101171_c0_seq3,comp101171_c0_seq5	577.26	523.83	410.95	49.62	33.35
comp101172_c0	comp101172_c0_seq1,comp101172_c0_seq2,comp101172_c0_seq3,comp101172_c0_seq4	1276.85	1223.39	61.97	3.19	2.14
comp101173_c0	comp101173_c0_seq1,comp101173_c0_seq2,comp101173_c0_seq3,comp101173_c0_seq4,comp101173_c0_seq5	2102.54	2049.08	105.73	3.24	2.18
comp101174_c0	comp101174_c0_seq1	2233	2179.54	378.03	10.88	7.32
comp101175_c0	comp101175_c0_seq1,comp101175_c0_seq2,comp101175_c0_seq3,comp101175_c0_seq4,comp101175_c0_seq5	1040.16	986.7	328.09	20.93	14.07
comp101176_c0	comp101176_c0_seq1	1475	1421.54	25	1.11	0.74
comp101177_c1	comp101177_c1_seq1,comp101177_c1_seq3,comp101177_c1_seq4	2313.96	2260.5	294.9	8.19	5.5
comp101178_c2	comp101178_c2_seq1,comp101178_c2_seq2,comp101178_c2_seq3	849.4	795.96	14.27	1.13	0.76
comp101179_c0	comp101179_c0_seq1,comp101179_c0_seq2,comp101179_c0_seq3,comp101179_c0_seq4,comp101179_c0_seq5	1810.14	1756.68	2184.34	78.08	52.48
comp10118_c0	comp10118_c0_seq1	543	489.57	2	0.26	0.17
comp101180_c0	comp101180_c0_seq1,comp101180_c0_seq2,comp101180_c0_seq3	2699.48	2646.02	771.31	18.28	12.29
comp101181_c0	comp101181_c0_seq1	1500	1446.54	1551.73	67.41	45.31
comp101182_c0	comp101182_c0_seq1,comp101182_c0_seq3,comp101182_c0_seq4,comp101182_c0_seq5	1061.55	1008.09	4	0.25	0.17
comp101183_c0	comp101183_c0_seq1,comp101183_c0_seq2,comp101183_c0_seq3,comp101183_c0_seq4,comp101183_c0_seq5	3449.07	3395.61	1379.97	25.48	17.13
comp101184_c0	comp101184_c0_seq2,comp101184_c0_seq3,comp101184_c0_seq4,comp101184_c0_seq5	1068.1	1014.64	65.9	4.09	2.75
comp101184_c1	comp101184_c1_seq1,comp101184_c1_seq2,comp101184_c1_seq3,comp101184_c1_seq4,comp101184_c1_seq5	2729.55	2676.09	6147	144.08	96.84
comp101185_c0	comp101185_c0_seq1,comp101185_c0_seq3,comp101185_c0_seq4	1708.31	1654.85	110	4.17	2.81
comp101186_c2	comp101186_c2_seq1,comp101186_c2_seq2,comp101186_c2_seq3,comp101186_c2_seq4,comp101186_c2_seq5	2728.45	2674.99	2290.01	53.7	36.09
comp101187_c0	comp101187_c0_seq1,comp101187_c0_seq2,comp101187_c0_seq3,comp101187_c0_seq4,comp101187_c0_seq5	1878.29	1824.83	153.06	5.27	3.54
comp101188_c0	comp101188_c0_seq1	661	607.55	15	1.56	1.05
comp101189_c0	comp101189_c0_seq1	1566	1512.54	34	1.41	0.95
comp101190_c0	comp101190_c0_seq1	1159	1105.54	16	0.91	0.61
comp101191_c1	comp101191_c1_seq1,comp101191_c1_seq2,comp101191_c1_seq3,comp101191_c1_seq5	1213	1159.54	14	0.76	0.51
comp101191_c2	comp101191_c2_seq1	507	453.59	1	0.14	0.09
comp101191_c3	comp101191_c3_seq1,comp101191_c3_seq2,comp101191_c3_seq3,comp101191_c3_seq4,comp101191_c3_seq5	671.33	617.9	5	0.51	0.34
comp101191_c4	comp101191_c4_seq1,comp101191_c4_seq2	751.25	697.8	21	1.9	1.28
comp101191_c5	comp101191_c5_seq1,comp101191_c5_seq2,comp101191_c5_seq3	823.21	769.75	12	0.98	0.66
comp101191_c6	comp101191_c6_seq1	960	906.54	3	0.21	0.14
comp101192_c0	comp101192_c0_seq1,comp101192_c0_seq2	3875.71	3822.25	1157.02	18.97	12.75
comp101193_c2	comp101193_c2_seq1,comp101193_c2_seq2,comp101193_c2_seq3,comp101193_c2_seq4,comp101193_c2_seq5	2076.54	2023.08	1760.99	54.64	36.72
comp101194_c0	comp101194_c0_seq1,comp101194_c0_seq2,comp101194_c0_seq3,comp101194_c0_seq4,comp101194_c0_seq5	1124.51	1071.05	95.9	5.63	3.79
comp101194_c1	comp101194_c1_seq2,comp101194_c1_seq3,comp101194_c1_seq4,comp101194_c1_seq5	1840.94	1787.48	281	9.87	6.63
comp101195_c0	comp101195_c0_seq1,comp101195_c0_seq2,comp101195_c0_seq3,comp101195_c0_seq4,comp101195_c0_seq5	2806	2752.54	22	0.5	0.34
comp101195_c1	comp101195_c1_seq1	615	561.56	1	0.11	0.08
comp101196_c0	comp101196_c0_seq1	908	854.54	29	2.14	1.44
comp101196_c1	comp101196_c1_seq1,comp101196_c1_seq2	768	714.54	17	1.5	1.01
comp101196_c2	comp101196_c2_seq1	716	662.55	17	1.62	1.09
comp101196_c3	comp101196_c3_seq1	639	585.56	17	1.83	1.23
comp101196_c4	comp101196_c4_seq2,comp101196_c4_seq3	1052.09	998.63	42	2.65	1.78
comp101196_c6	comp101196_c6_seq1,comp101196_c6_seq2,comp101196_c6_seq3,comp101196_c6_seq5	1187.56	1134.1	124	6.88	4.62
comp101196_c7	comp101196_c7_seq3,comp101196_c7_seq4,comp101196_c7_seq5	1332.94	1279.49	22	1.08	0.73
comp101196_c8	comp101196_c8_seq1,comp101196_c8_seq2,comp101196_c8_seq3	581.23	527.8	31	3.71	2.5
comp101196_c9	comp101196_c9_seq2	684	630.55	4	0.4	0.27
comp101197_c1	comp101197_c1_seq1,comp101197_c1_seq2,comp101197_c1_seq3,comp101197_c1_seq4,comp101197_c1_seq5	4215	4161.54	666	10.03	6.74
comp101198_c0	comp101198_c0_seq1	542	488.57	8	1.04	0.7
comp101199_c0	comp101199_c0_seq1	563	509.57	1	0.12	0.08
comp101199_c1	comp101199_c1_seq1,comp101199_c1_seq2,comp101199_c1_seq3,comp101199_c1_seq4,comp101199_c1_seq5	1113.24	1059.78	35	2.08	1.4
comp101200_c0	comp101200_c0_seq1,comp101200_c0_seq2,comp101200_c0_seq3,comp101200_c0_seq5	2076.87	2023.41	313	9.71	6.53
comp101201_c1	comp101201_c1_seq1	547	493.57	7	0.9	0.6
comp101201_c2	comp101201_c2_seq1,comp101201_c2_seq2,comp101201_c2_seq3,comp101201_c2_seq4,comp101201_c2_seq5	859	805.54	530	41.47	27.87
comp101202_c0	comp101202_c0_seq1,comp101202_c0_seq2,comp101202_c0_seq3,comp101202_c0_seq5	858.73	805.27	9	0.7	0.47
comp101203_c0	comp101203_c0_seq1,comp101203_c0_seq2,comp101203_c0_seq3,comp101203_c0_seq4,comp101203_c0_seq5	2288.31	2234.85	2683.82	75.36	50.65
[truncated: 52,049 more rows]

## Sheet: CS(-5)
Gene_id	Transcript_id(s)	Length	Effective_length	Expected_count	TPM	FPKM
comp100_c0	comp100_c0_seq1	827	775.54	8	0.63	0.45
comp100000_c0	comp100000_c0_seq1,comp100000_c0_seq2,comp100000_c0_seq3,comp100000_c0_seq4,comp100000_c0_seq5	2183.47	2132.01	2300.92	65.21	46.73
comp100001_c0	comp100001_c0_seq1	2069	2017.54	57	1.71	1.22
comp100002_c0	comp100002_c0_seq2,comp100002_c0_seq3,comp100002_c0_seq4,comp100002_c0_seq5	1098.86	1047.41	2131.39	123.3	88.36
comp100003_c0	comp100003_c0_seq1,comp100003_c0_seq2,comp100003_c0_seq3,comp100003_c0_seq4,comp100003_c0_seq5	2984.75	2933.3	685.99	14.12	10.12
comp100004_c1	comp100004_c1_seq1,comp100004_c1_seq2	533	481.57	28	3.54	2.54
comp100005_c0	comp100005_c0_seq1,comp100005_c0_seq2,comp100005_c0_seq3	1702.46	1651	97	3.55	2.55
comp100006_c0	comp100006_c0_seq1	534	482.57	0	0	0
comp100006_c1	comp100006_c1_seq1,comp100006_c1_seq2,comp100006_c1_seq3,comp100006_c1_seq4,comp100006_c1_seq5	1288.78	1237.32	160	7.83	5.61
comp100006_c2	comp100006_c2_seq1,comp100006_c2_seq4	2689.71	2638.25	358	8.19	5.87
comp100007_c0	comp100007_c0_seq1	1451	1399.54	42	1.82	1.3
comp100008_c1	comp100008_c1_seq1,comp100008_c1_seq3,comp100008_c1_seq4	1237.97	1186.51	53	2.7	1.94
comp100009_c0	comp100009_c0_seq1,comp100009_c0_seq2	1349.16	1297.7	4018.47	187.44	134.32
comp100010_c1	comp100010_c1_seq1,comp100010_c1_seq2,comp100010_c1_seq3,comp100010_c1_seq4,comp100010_c1_seq5	3174.46	3123	2959.94	57.22	41
comp100010_c3	comp100010_c3_seq1	1043	991.54	19	1.16	0.83
comp100010_c4	comp100010_c4_seq1	1717	1665.54	1108.95	40.26	28.85
comp100011_c0	comp100011_c0_seq1,comp100011_c0_seq2,comp100011_c0_seq3,comp100011_c0_seq4,comp100011_c0_seq5	1370.93	1319.47	13	0.6	0.43
comp100011_c1	comp100011_c1_seq1,comp100011_c1_seq2,comp100011_c1_seq3,comp100011_c1_seq4	733.43	681.98	16	1.43	1.02
comp100011_c2	comp100011_c2_seq1,comp100011_c2_seq2	570	518.57	6.39	0.75	0.54
comp100012_c0	comp100012_c0_seq1,comp100012_c0_seq2,comp100012_c0_seq3,comp100012_c0_seq4,comp100012_c0_seq5	5002.72	4951.26	991.38	12.08	8.66
comp100012_c2	comp100012_c2_seq1	639	587.56	53.97	5.59	4
comp100012_c4	comp100012_c4_seq1,comp100012_c4_seq2,comp100012_c4_seq3,comp100012_c4_seq4,comp100012_c4_seq5	2226.44	2174.98	2807.34	77.99	55.89
comp100013_c0	comp100013_c0_seq1,comp100013_c0_seq2	550.53	499.1	58	7.08	5.07
comp100013_c1	comp100013_c1_seq2,comp100013_c1_seq3,comp100013_c1_seq4,comp100013_c1_seq5	1099.37	1047.92	101	5.84	4.19
comp100013_c3	comp100013_c3_seq2	792	740.54	15	1.23	0.88
comp100014_c0	comp100014_c0_seq1,comp100014_c0_seq2,comp100014_c0_seq3,comp100014_c0_seq4	1210.13	1158.67	244	12.75	9.14
comp100015_c0	comp100015_c0_seq1,comp100015_c0_seq2	1990.28	1938.82	119	3.71	2.66
comp100015_c1	comp100015_c1_seq1,comp100015_c1_seq2,comp100015_c1_seq4	916.39	864.94	64	4.49	3.22
comp100015_c2	comp100015_c2_seq1,comp100015_c2_seq2,comp100015_c2_seq3,comp100015_c2_seq5	1221.59	1170.14	172	8.9	6.38
comp100016_c0	comp100016_c0_seq1,comp100016_c0_seq3,comp100016_c0_seq4,comp100016_c0_seq5	904.68	853.23	80	5.69	4.08
comp100016_c2	comp100016_c2_seq1	571	519.57	15	1.76	1.26
comp100016_c3	comp100016_c3_seq1,comp100016_c3_seq2	1226.83	1175.37	31	1.6	1.14
comp100017_c0	comp100017_c0_seq2,comp100017_c0_seq5	1905.33	1853.87	603.44	19.68	14.1
comp100017_c1	comp100017_c1_seq2	556	504.57	17	2.05	1.47
comp100017_c3	comp100017_c3_seq1,comp100017_c3_seq2,comp100017_c3_seq3	586.24	534.8	24	2.73	1.96
comp100018_c0	comp100018_c0_seq1,comp100018_c0_seq2,comp100018_c0_seq3	855.15	803.72	37	2.79	2
comp100019_c1	comp100019_c1_seq1,comp100019_c1_seq2,comp100019_c1_seq3,comp100019_c1_seq4	908.79	857.33	50	3.54	2.54
comp100019_c2	comp100019_c2_seq1,comp100019_c2_seq2,comp100019_c2_seq3,comp100019_c2_seq4,comp100019_c2_seq5	1549.58	1498.13	569.74	23.01	16.49
comp100020_c0	comp100020_c0_seq3,comp100020_c0_seq4	1072.16	1020.71	159.07	9.44	6.77
comp100021_c0	comp100021_c0_seq1,comp100021_c0_seq2,comp100021_c0_seq3,comp100021_c0_seq4,comp100021_c0_seq5	1073.52	1022.08	186	11.03	7.9
comp100022_c0	comp100022_c0_seq1,comp100022_c0_seq2,comp100022_c0_seq3,comp100022_c0_seq4,comp100022_c0_seq5	1289.53	1238.07	260	12.71	9.11
comp100023_c0	comp100023_c0_seq1,comp100023_c0_seq2,comp100023_c0_seq3,comp100023_c0_seq4,comp100023_c0_seq5	2665.61	2614.16	321	7.42	5.31
comp100023_c4	comp100023_c4_seq1,comp100023_c4_seq2,comp100023_c4_seq3,comp100023_c4_seq4,comp100023_c4_seq5	899.15	847.7	68	4.87	3.49
comp100024_c0	comp100024_c0_seq1,comp100024_c0_seq2,comp100024_c0_seq3,comp100024_c0_seq5	1279.93	1228.48	54	2.66	1.91
comp100024_c2	comp100024_c2_seq1	555	503.57	8	0.97	0.69
comp100025_c0	comp100025_c0_seq1	539	487.57	0	0	0
comp100026_c1	comp100026_c1_seq1	768	716.54	52	4.41	3.16
comp100026_c4	comp100026_c4_seq3	573	521.57	35	4.09	2.93
comp100026_c5	comp100026_c5_seq1,comp100026_c5_seq2,comp100026_c5_seq3,comp100026_c5_seq4	814.13	762.68	49	3.9	2.8
comp100026_c6	comp100026_c6_seq1	628	576.56	12	1.27	0.91
comp100026_c7	comp100026_c7_seq1,comp100026_c7_seq3	1411.29	1359.83	103	4.58	3.28
comp100026_c8	comp100026_c8_seq1,comp100026_c8_seq2	673	621.55	5	0.49	0.35
comp100027_c0	comp100027_c0_seq1,comp100027_c0_seq2	1000.25	948.8	18.99	1.21	0.87
comp100028_c0	comp100028_c0_seq2,comp100028_c0_seq3,comp100028_c0_seq4,comp100028_c0_seq5	974.92	923.46	34	2.23	1.6
comp100028_c2	comp100028_c2_seq1,comp100028_c2_seq2	650	598.55	21	2.13	1.53
comp100028_c3	comp100028_c3_seq1,comp100028_c3_seq3	565.82	514.39	49	5.8	4.16
comp100029_c0	comp100029_c0_seq1,comp100029_c0_seq2,comp100029_c0_seq3	3316.22	3264.77	152	2.81	2.01
comp100030_c0	comp100030_c0_seq1,comp100030_c0_seq2	1999	1947.54	0	0	0
comp100031_c0	comp100031_c0_seq1,comp100031_c0_seq2	2177.46	2126	392.99	11.17	8
comp100032_c0	comp100032_c0_seq1,comp100032_c0_seq2,comp100032_c0_seq3,comp100032_c0_seq4	2062.63	2011.17	214.95	6.46	4.63
comp100033_c0	comp100033_c0_seq1	1410	1358.54	16	0.71	0.51
comp100033_c2	comp100033_c2_seq1	541	489.57	33	4.11	2.94
comp100033_c3	comp100033_c3_seq2,comp100033_c3_seq3,comp100033_c3_seq4,comp100033_c3_seq5	1011.9	960.45	48	3.03	2.17
comp100033_c5	comp100033_c5_seq1	641	589.56	46	4.75	3.4
comp100034_c0	comp100034_c0_seq1,comp100034_c0_seq2	1215.42	1163.96	380.63	19.8	14.19
comp100035_c0	comp100035_c0_seq1,comp100035_c0_seq2	583.29	531.86	35	4.01	2.87
comp100035_c1	comp100035_c1_seq2,comp100035_c1_seq4,comp100035_c1_seq5	1120.43	1068.97	999.09	56.62	40.58
comp100036_c0	comp100036_c0_seq1,comp100036_c0_seq2,comp100036_c0_seq3,comp100036_c0_seq4,comp100036_c0_seq5	2530.58	2479.12	1388	33.82	24.23
comp100036_c1	comp100036_c1_seq1,comp100036_c1_seq2,comp100036_c1_seq3,comp100036_c1_seq4	3063.01	3011.56	144	2.89	2.07
comp100037_c0	comp100037_c0_seq1	534	482.57	12	1.52	1.09
comp100037_c1	comp100037_c1_seq1,comp100037_c1_seq2,comp100037_c1_seq3,comp100037_c1_seq4,comp100037_c1_seq5	1161.75	1110.3	394.91	21.54	15.44
comp100037_c2	comp100037_c2_seq1,comp100037_c2_seq2	2133.66	2082.21	3822.14	110.92	79.49
comp100038_c0	comp100038_c0_seq1,comp100038_c0_seq2	1726.74	1675.28	309	11.15	7.99
comp100038_c1	comp100038_c1_seq1,comp100038_c1_seq2,comp100038_c1_seq3	590.58	539.14	15	1.69	1.21
comp100038_c3	comp100038_c3_seq1	677	625.55	3	0.29	0.21
comp100038_c4	comp100038_c4_seq1	695	643.55	35	3.31	2.37
comp100038_c5	comp100038_c5_seq1,comp100038_c5_seq2	593	541.56	8	0.9	0.64
comp100038_c8	comp100038_c8_seq1,comp100038_c8_seq2,comp100038_c8_seq3,comp100038_c8_seq4,comp100038_c8_seq5	533.23	481.8	19	2.4	1.72
comp100039_c1	comp100039_c1_seq1,comp100039_c1_seq2,comp100039_c1_seq3,comp100039_c1_seq4,comp100039_c1_seq5	1884.45	1833	12	0.4	0.28
comp100040_c0	comp100040_c0_seq1,comp100040_c0_seq2,comp100040_c0_seq3,comp100040_c0_seq4,comp100040_c0_seq5	1501.26	1449.8	128	5.34	3.83
comp100041_c0	comp100041_c0_seq1,comp100041_c0_seq2,comp100041_c0_seq3,comp100041_c0_seq4,comp100041_c0_seq5	1319.05	1267.6	154	7.35	5.27
comp100041_c1	comp100041_c1_seq1,comp100041_c1_seq2,comp100041_c1_seq3,comp100041_c1_seq4,comp100041_c1_seq5	2502.86	2451.4	173	4.26	3.05
comp100041_c3	comp100041_c3_seq1	779	727.54	11	0.92	0.66
comp100042_c0	comp100042_c0_seq1	713	661.55	15	1.38	0.99
comp100042_c1	comp100042_c1_seq1,comp100042_c1_seq2	506	454.58	3	0.4	0.29
comp100042_c4	comp100042_c4_seq2,comp100042_c4_seq3,comp100042_c4_seq5	930	878.54	10	0.69	0.49
comp100042_c5	comp100042_c5_seq1	503	451.58	6	0.81	0.58
comp100043_c0	comp100043_c0_seq1,comp100043_c0_seq2,comp100043_c0_seq3,comp100043_c0_seq4	2499.31	2447.85	2063.72	50.92	36.49
comp100043_c1	comp100043_c1_seq1	522	470.58	29	3.76	2.69
comp100044_c0	comp100044_c0_seq1,comp100044_c0_seq2,comp100044_c0_seq4	692.88	641.43	31	2.94	2.11
comp100045_c0	comp100045_c0_seq2,comp100045_c0_seq4	649.54	598.1	9	0.92	0.66
comp100045_c1	comp100045_c1_seq1,comp100045_c1_seq2	767	715.54	39	3.31	2.37
comp100045_c2	comp100045_c2_seq1,comp100045_c2_seq2	594.41	542.97	18	2.02	1.45
comp100046_c0	comp100046_c0_seq1,comp100046_c0_seq2	1894.45	1843	32.9	1.08	0.77
comp100047_c0	comp100047_c0_seq1,comp100047_c0_seq2	552	500.57	2	0.24	0.17
comp100047_c3	comp100047_c3_seq1,comp100047_c3_seq2,comp100047_c3_seq3,comp100047_c3_seq5	1428.78	1377.33	40	1.76	1.26
comp100047_c5	comp100047_c5_seq1	1347	1295.54	43.02	2.01	1.44
comp100048_c0	comp100048_c0_seq1,comp100048_c0_seq2,comp100048_c0_seq3,comp100048_c0_seq4,comp100048_c0_seq5	1543.65	1492.19	636.02	25.78	18.48
comp100050_c1	comp100050_c1_seq1,comp100050_c1_seq2,comp100050_c1_seq3,comp100050_c1_seq4,comp100050_c1_seq5	1879.38	1827.92	617.03	20.41	14.62
comp100051_c0	comp100051_c0_seq1,comp100051_c0_seq2,comp100051_c0_seq3,comp100051_c0_seq4,comp100051_c0_seq5	1770.31	1718.85	59	2.08	1.49
comp100052_c0	comp100052_c0_seq1	2537	2485.54	202	4.91	3.52
comp100053_c0	comp100053_c0_seq1,comp100053_c0_seq2,comp100053_c0_seq3	1267.68	1216.22	584	29.07	20.83
comp100054_c1	comp100054_c1_seq1,comp100054_c1_seq2,comp100054_c1_seq3,comp100054_c1_seq4,comp100054_c1_seq5	2831.29	2779.83	465.89	10.12	7.25
comp100055_c0	comp100055_c0_seq2,comp100055_c0_seq3,comp100055_c0_seq4,comp100055_c0_seq5	1778.47	1727.01	1376.9	48.21	34.54
comp100056_c0	comp100056_c0_seq1,comp100056_c0_seq2	5033	4981.54	670.24	8.12	5.82
comp100057_c0	comp100057_c0_seq1,comp100057_c0_seq2,comp100057_c0_seq3,comp100057_c0_seq4	1826.5	1775.04	145	4.94	3.54
comp100058_c0	comp100058_c0_seq1,comp100058_c0_seq2,comp100058_c0_seq3,comp100058_c0_seq4,comp100058_c0_seq5	1277.27	1225.82	72	3.56	2.55
comp100059_c0	comp100059_c0_seq1	1332	1280.54	198	9.36	6.71
comp100061_c0	comp100061_c0_seq1,comp100061_c0_seq2,comp100061_c0_seq3,comp100061_c0_seq4,comp100061_c0_seq5	1863.37	1811.91	266.7	8.9	6.38
comp100062_c1	comp100062_c1_seq1,comp100062_c1_seq2,comp100062_c1_seq3,comp100062_c1_seq5	885.72	834.27	45.76	3.33	2.38
comp100063_c0	comp100063_c0_seq1,comp100063_c0_seq2,comp100063_c0_seq3,comp100063_c0_seq4,comp100063_c0_seq5	1301.08	1249.62	269.43	13.05	9.35
comp100064_c1	comp100064_c1_seq1,comp100064_c1_seq2	2374.68	2323.22	189	4.91	3.52
comp100065_c0	comp100065_c0_seq1	927	875.54	76.25	5.28	3.79
comp1000654_c0	comp1000654_c0_seq1	676	624.55	3	0.29	0.21
comp100066_c0	comp100066_c0_seq1,comp100066_c0_seq2,comp100066_c0_seq3,comp100066_c0_seq4,comp100066_c0_seq5	2486	2434.54	21	0.52	0.37
comp100066_c1	comp100066_c1_seq1	920	868.54	2	0.14	0.1
comp100067_c1	comp100067_c1_seq1,comp100067_c1_seq2,comp100067_c1_seq3,comp100067_c1_seq4	3598.71	3547.25	1753.87	29.84	21.39
comp100068_c0	comp100068_c0_seq1	621	569.56	5	0.53	0.38
comp100068_c1	comp100068_c1_seq1	5441	5389.54	543.99	6.09	4.36
comp100069_c0	comp100069_c0_seq1,comp100069_c0_seq2,comp100069_c0_seq3,comp100069_c0_seq4	1147.38	1095.94	37	2.05	1.47
comp100069_c1	comp100069_c1_seq1	541	489.57	12.03	1.5	1.07
comp100070_c2	comp100070_c2_seq1,comp100070_c2_seq2,comp100070_c2_seq4,comp100070_c2_seq5	760.9	709.45	35	3	2.15
comp100070_c4	comp100070_c4_seq1,comp100070_c4_seq2,comp100070_c4_seq3,comp100070_c4_seq4,comp100070_c4_seq5	666.68	615.23	57	5.63	4.04
comp100071_c0	comp100071_c0_seq1,comp100071_c0_seq2	3101.36	3049.9	805.02	15.94	11.42
comp100072_c0	comp100072_c0_seq1,comp100072_c0_seq2,comp100072_c0_seq3,comp100072_c0_seq4,comp100072_c0_seq5	12344.3	12292.9	841.16	4.13	2.96
comp100073_c0	comp100073_c0_seq1	2293	2241.54	5855.21	157.81	113.09
comp100074_c0	comp100074_c0_seq1	2334	2282.54	53	1.4	1.01
comp100075_c0	comp100075_c0_seq1	3455	3403.54	823	14.6	10.46
comp100076_c1	comp100076_c1_seq1,comp100076_c1_seq2,comp100076_c1_seq3,comp100076_c1_seq4,comp100076_c1_seq5	989.91	938.46	317	20.48	14.68
comp100076_c2	comp100076_c2_seq1,comp100076_c2_seq2,comp100076_c2_seq3,comp100076_c2_seq4	610.35	558.91	86	9.37	6.71
comp100077_c0	comp100077_c0_seq1,comp100077_c0_seq2,comp100077_c0_seq4	722.46	671.01	28	2.54	1.82
comp100078_c0	comp100078_c0_seq2	2049	1997.54	5068.58	153.35	109.89
comp100080_c0	comp100080_c0_seq1	1148	1096.54	19	1.05	0.75
comp100080_c1	comp100080_c1_seq1,comp100080_c1_seq2,comp100080_c1_seq3	1669.3	1617.85	230	8.6	6.16
comp100080_c2	comp100080_c2_seq1,comp100080_c2_seq2,comp100080_c2_seq3,comp100080_c2_seq4,comp100080_c2_seq5	1019.53	968.07	287.98	18.03	12.92
comp100080_c3	comp100080_c3_seq2,comp100080_c3_seq3,comp100080_c3_seq5	1273.75	1222.29	16	0.79	0.57
comp100081_c1	comp100081_c1_seq1,comp100081_c1_seq2,comp100081_c1_seq3,comp100081_c1_seq4,comp100081_c1_seq5	1992.18	1940.72	73	2.27	1.63
comp100081_c2	comp100081_c2_seq1	1599	1547.54	231.99	9.07	6.5
comp100082_c0	comp100082_c0_seq1,comp100082_c0_seq2,comp100082_c0_seq3,comp100082_c0_seq4,comp100082_c0_seq5	2643.09	2591.63	198	4.61	3.31
comp100082_c1	comp100082_c1_seq1,comp100082_c1_seq2	1082.97	1031.51	11	0.65	0.46
comp100082_c2	comp100082_c2_seq1,comp100082_c2_seq3,comp100082_c2_seq4	839.9	788.45	15	1.15	0.83
comp100082_c7	comp100082_c7_seq1	718	666.55	4	0.36	0.26
comp100083_c0	comp100083_c0_seq2,comp100083_c0_seq3	654.77	603.33	7	0.71	0.51
comp100083_c1	comp100083_c1_seq1,comp100083_c1_seq2,comp100083_c1_seq3	609.59	558.15	21	2.29	1.64
comp100083_c4	comp100083_c4_seq1,comp100083_c4_seq2,comp100083_c4_seq3	1289	1237.54	22	1.08	0.77
comp100083_c5	comp100083_c5_seq1	585	533.56	22	2.51	1.8
comp100083_c6	comp100083_c6_seq1,comp100083_c6_seq3,comp100083_c6_seq4,comp100083_c6_seq5	2580.9	2529.44	530	12.65	9.07
comp100084_c0	comp100084_c0_seq1	3757	3705.54	10569.5	172.15	123.36
comp100085_c0	comp100085_c0_seq1	569	517.57	4	0.47	0.34
comp100085_c2	comp100085_c2_seq1,comp100085_c2_seq3,comp100085_c2_seq4,comp100085_c2_seq5	2601.4	2549.95	160.97	3.81	2.73
comp100086_c0	comp100086_c0_seq1,comp100086_c0_seq2,comp100086_c0_seq3,comp100086_c0_seq4,comp100086_c0_seq5	1471.96	1420.5	126	5.37	3.85
comp100087_c0	comp100087_c0_seq1,comp100087_c0_seq2,comp100087_c0_seq3,comp100087_c0_seq4,comp100087_c0_seq5	3084.6	3033.14	655.02	13.04	9.34
comp100088_c0	comp100088_c0_seq1,comp100088_c0_seq2,comp100088_c0_seq3,comp100088_c0_seq4,comp100088_c0_seq5	1550.21	1498.75	130	5.25	3.76
comp100089_c1	comp100089_c1_seq1	1033	981.54	18	1.11	0.8
comp100089_c2	comp100089_c2_seq1,comp100089_c2_seq2,comp100089_c2_seq3,comp100089_c2_seq4,comp100089_c2_seq5	1201.61	1150.15	155	8.16	5.85
comp100090_c0	comp100090_c0_seq1	608	556.56	46.86	5.13	3.67
comp100091_c0	comp100091_c0_seq1,comp100091_c0_seq2,comp100091_c0_seq3,comp100091_c0_seq4	726.78	675.33	26	2.34	1.68
comp100091_c2	comp100091_c2_seq1	506	454.58	10	1.34	0.96
comp100092_c0	comp100092_c0_seq1,comp100092_c0_seq2,comp100092_c0_seq3	1085.1	1033.64	225.89	13.24	9.49
comp100093_c0	comp100093_c0_seq1	500	448.58	53	7.21	5.17
comp100093_c2	comp100093_c2_seq1	1175	1123.54	101	5.44	3.9
comp100093_c3	comp100093_c3_seq2,comp100093_c3_seq4,comp100093_c3_seq5	768.99	717.54	21	1.78	1.27
comp100094_c1	comp100094_c1_seq1,comp100094_c1_seq2,comp100094_c1_seq3,comp100094_c1_seq4	1269.47	1218.01	580.2	28.84	20.67
comp100095_c0	comp100095_c0_seq1,comp100095_c0_seq2	2981.04	2929.58	2445.17	50.39	36.11
comp100096_c0	comp100096_c0_seq1,comp100096_c0_seq2	1732.13	1680.68	28	1.01	0.72
comp100097_c0	comp100097_c0_seq1,comp100097_c0_seq2	755.64	704.19	29	2.5	1.79
comp100098_c0	comp100098_c0_seq1,comp100098_c0_seq2,comp100098_c0_seq3,comp100098_c0_seq4,comp100098_c0_seq5	1411.34	1359.88	58	2.58	1.85
comp100098_c1	comp100098_c1_seq1,comp100098_c1_seq2,comp100098_c1_seq3	571.83	520.4	14	1.64	1.17
comp100099_c3	comp100099_c3_seq1,comp100099_c3_seq2,comp100099_c3_seq3,comp100099_c3_seq4,comp100099_c3_seq5	866.91	815.45	305.43	22.73	16.29
comp10010_c0	comp10010_c0_seq1	549	497.57	4	0.49	0.35
comp100100_c0	comp100100_c0_seq1,comp100100_c0_seq2,comp100100_c0_seq3	826.8	775.35	12	0.94	0.67
comp100100_c1	comp100100_c1_seq1,comp100100_c1_seq2	2719.13	2667.67	22	0.5	0.36
comp100100_c2	comp100100_c2_seq1,comp100100_c2_seq2,comp100100_c2_seq3,comp100100_c2_seq4	2475.12	2423.66	1188	29.61	21.22
comp100101_c0	comp100101_c0_seq1,comp100101_c0_seq2,comp100101_c0_seq3,comp100101_c0_seq4,comp100101_c0_seq5	2842.99	2791.54	297	6.42	4.6
comp100101_c2	comp100101_c2_seq1	564	512.57	19	2.26	1.62
comp100101_c3	comp100101_c3_seq1	661	609.55	18	1.8	1.29
comp100102_c0	comp100102_c0_seq1,comp100102_c0_seq2,comp100102_c0_seq3,comp100102_c0_seq4	975.73	924.28	30	1.97	1.41
comp100103_c0	comp100103_c0_seq1,comp100103_c0_seq2,comp100103_c0_seq3,comp100103_c0_seq4,comp100103_c0_seq5	1707.72	1656.26	855.89	31.25	22.39
comp100104_c0	comp100104_c0_seq1,comp100104_c0_seq2,comp100104_c0_seq3,comp100104_c0_seq4,comp100104_c0_seq5	2682.85	2631.4	341.38	7.83	5.61
comp100104_c2	comp100104_c2_seq1,comp100104_c2_seq2,comp100104_c2_seq3,comp100104_c2_seq4,comp100104_c2_seq5	891.27	839.82	44	3.18	2.28
comp100104_c3	comp100104_c3_seq1,comp100104_c3_seq2	1108.62	1057.17	10	0.57	0.41
comp100105_c0	comp100105_c0_seq2	912	860.54	90	6.34	4.55
comp100106_c0	comp100106_c0_seq1,comp100106_c0_seq2,comp100106_c0_seq3,comp100106_c0_seq4,comp100106_c0_seq5	2288.59	2237.13	102.01	2.75	1.97
comp100107_c0	comp100107_c0_seq1,comp100107_c0_seq3	569.45	518.02	18.1	2.13	1.53
comp100108_c1	comp100108_c1_seq1,comp100108_c1_seq3,comp100108_c1_seq4,comp100108_c1_seq5	1163.17	1111.71	170	9.26	6.64
comp100109_c0	comp100109_c0_seq1,comp100109_c0_seq2,comp100109_c0_seq3,comp100109_c0_seq4,comp100109_c0_seq5	589.48	538.05	21.24	2.4	1.72
comp100110_c0	comp100110_c0_seq1,comp100110_c0_seq2	685.09	633.64	40	3.84	2.75
comp100110_c2	comp100110_c2_seq1,comp100110_c2_seq2,comp100110_c2_seq3,comp100110_c2_seq4	648	596.56	0	0	0
comp100111_c0	comp100111_c0_seq1,comp100111_c0_seq2	1016.72	965.26	52	3.27	2.34
comp100111_c1	comp100111_c1_seq1,comp100111_c1_seq2,comp100111_c1_seq3,comp100111_c1_seq4,comp100111_c1_seq5	1447.13	1395.67	169.21	7.34	5.26
comp100111_c2	comp100111_c2_seq1,comp100111_c2_seq2,comp100111_c2_seq3	2920.35	2868.89	1079.97	22.73	16.29
comp100111_c3	comp100111_c3_seq1	659	607.55	7	0.7	0.5
comp100111_c5	comp100111_c5_seq1,comp100111_c5_seq2	922.07	870.61	43	3	2.15
comp100111_c6	comp100111_c6_seq1,comp100111_c6_seq2	820	768.54	1	0.08	0.06
comp100112_c0	comp100112_c0_seq1,comp100112_c0_seq3,comp100112_c0_seq4,comp100112_c0_seq5	849.08	797.62	59	4.49	3.22
comp100112_c2	comp100112_c2_seq1,comp100112_c2_seq2,comp100112_c2_seq3,comp100112_c2_seq4,comp100112_c2_seq5	1686.22	1634.77	67	2.48	1.78
comp100112_c3	comp100112_c3_seq1,comp100112_c3_seq2	3028.61	2977.15	54	1.1	0.78
comp100112_c4	comp100112_c4_seq1,comp100112_c4_seq2,comp100112_c4_seq3	1011.83	960.38	199	12.56	9
comp100112_c5	comp100112_c5_seq1,comp100112_c5_seq2	603	551.56	13	1.43	1.03
comp100113_c0	comp100113_c0_seq1,comp100113_c0_seq2,comp100113_c0_seq4,comp100113_c0_seq5	638.27	586.83	19.99	2.07	1.49
comp100113_c1	comp100113_c1_seq1	589	537.56	11	1.25	0.89
comp100114_c0	comp100114_c0_seq1,comp100114_c0_seq2,comp100114_c0_seq3	1722.88	1671.43	1313.61	47.52	34.06
comp100115_c0	comp100115_c0_seq1,comp100115_c0_seq2,comp100115_c0_seq3,comp100115_c0_seq4,comp100115_c0_seq5	899.54	848.08	195	13.95	10
comp100116_c0	comp100116_c0_seq1,comp100116_c0_seq2,comp100116_c0_seq3,comp100116_c0_seq4,comp100116_c0_seq5	2395.52	2344.06	73	1.88	1.35
comp100117_c0	comp100117_c0_seq1,comp100117_c0_seq2,comp100117_c0_seq3,comp100117_c0_seq4,comp100117_c0_seq5	4093.54	4042.08	2191.25	32.71	23.44
comp100118_c1	comp100118_c1_seq2	511	459.58	24	3.19	2.28
comp100118_c3	comp100118_c3_seq1,comp100118_c3_seq2,comp100118_c3_seq4,comp100118_c3_seq5	573.7	522.27	47	5.48	3.93
comp100119_c1	comp100119_c1_seq1,comp100119_c1_seq2,comp100119_c1_seq3,comp100119_c1_seq4	5265.96	5214.51	1852	21.42	15.35
comp100119_c2	comp100119_c2_seq1	698	646.55	14	1.32	0.94
comp100120_c2	comp100120_c2_seq1,comp100120_c2_seq2	851	799.54	5	0.38	0.27
comp100120_c3	comp100120_c3_seq1,comp100120_c3_seq2,comp100120_c3_seq3,comp100120_c3_seq5	2030.81	1979.36	690.85	21.09	15.12
comp100121_c0	comp100121_c0_seq1,comp100121_c0_seq2,comp100121_c0_seq3,comp100121_c0_seq4,comp100121_c0_seq5	1808.83	1757.37	986.17	33.93	24.31
comp100121_c1	comp100121_c1_seq1,comp100121_c1_seq2,comp100121_c1_seq3	972.57	921.11	487	32.06	22.97
comp100122_c0	comp100122_c0_seq1	843	791.54	5	0.38	0.27
comp100122_c2	comp100122_c2_seq1,comp100122_c2_seq2,comp100122_c2_seq3,comp100122_c2_seq4,comp100122_c2_seq5	1866.94	1815.48	558.07	18.58	13.32
comp100122_c3	comp100122_c3_seq1,comp100122_c3_seq2	1644	1592.54	30	1.14	0.82
comp100123_c2	comp100123_c2_seq1,comp100123_c2_seq2,comp100123_c2_seq3,comp100123_c2_seq4,comp100123_c2_seq5	2237.83	2186.38	420	11.61	8.32
comp100124_c0	comp100124_c0_seq1,comp100124_c0_seq2,comp100124_c0_seq3,comp100124_c0_seq4,comp100124_c0_seq5	1372.16	1320.71	163	7.47	5.35
comp100125_c0	comp100125_c0_seq1,comp100125_c0_seq2,comp100125_c0_seq3,comp100125_c0_seq4	1428.15	1376.69	377.74	16.6	11.9
comp100126_c0	comp100126_c0_seq1	1970	1918.54	960	30.24	21.67
comp100127_c0	comp100127_c0_seq1,comp100127_c0_seq2,comp100127_c0_seq3	758.19	706.77	45	3.87	2.77
comp100128_c1	comp100128_c1_seq2,comp100128_c1_seq3,comp100128_c1_seq4,comp100128_c1_seq5	1263.07	1211.62	126.94	6.34	4.55
comp100128_c2	comp100128_c2_seq1,comp100128_c2_seq2,comp100128_c2_seq3,comp100128_c2_seq4,comp100128_c2_seq5	1788.31	1736.86	637	22.17	15.89
comp100129_c0	comp100129_c0_seq1,comp100129_c0_seq2	2703.58	2652.12	439	10	7.16
comp100130_c0	comp100130_c0_seq1	1177	1125.54	196	10.55	7.56
comp100130_c1	comp100130_c1_seq1	646	594.55	13	1.33	0.95
comp100130_c2	comp100130_c2_seq1,comp100130_c2_seq2,comp100130_c2_seq3,comp100130_c2_seq4,comp100130_c2_seq5	1401.49	1350.04	105	4.71	3.37
comp100131_c0	comp100131_c0_seq1	2167	2115.54	3023.3	86.35	61.88
comp100132_c0	comp100132_c0_seq2,comp100132_c0_seq3	1335.24	1283.78	22	1.04	0.74
comp100133_c0	comp100133_c0_seq1,comp100133_c0_seq2,comp100133_c0_seq3,comp100133_c0_seq4,comp100133_c0_seq5	1168.69	1117.23	248.05	13.45	9.64
comp100134_c0	comp100134_c0_seq1,comp100134_c0_seq2	2827.79	2776.34	529	11.51	8.25
comp100135_c0	comp100135_c0_seq1,comp100135_c0_seq2,comp100135_c0_seq3,comp100135_c0_seq4,comp100135_c0_seq5	1286.14	1234.68	52	2.55	1.83
comp100135_c4	comp100135_c4_seq1,comp100135_c4_seq3,comp100135_c4_seq4,comp100135_c4_seq5	1006.06	954.6	38	2.41	1.73
comp100136_c0	comp100136_c0_seq1,comp100136_c0_seq2,comp100136_c0_seq3,comp100136_c0_seq4,comp100136_c0_seq5	1980.96	1929.51	101.18	3.17	2.27
comp100137_c1	comp100137_c1_seq1,comp100137_c1_seq2	2375	2323.54	21.99	0.57	0.41
comp100138_c0	comp100138_c0_seq1,comp100138_c0_seq2,comp100138_c0_seq3	999.34	947.88	2046.87	130.92	93.82
comp100139_c0	comp100139_c0_seq1	2838	2786.54	490.26	10.62	7.61
comp100141_c0	comp100141_c0_seq1	6244	6192.54	96	0.94	0.67
comp100142_c0	comp100142_c0_seq1	626	574.56	2	0.21	0.15
comp100142_c1	comp100142_c1_seq1,comp100142_c1_seq2	1009.87	958.41	58.86	3.72	2.67
comp100142_c2	comp100142_c2_seq2,comp100142_c2_seq4	683	631.55	21	2.02	1.45
comp100143_c0	comp100143_c0_seq1,comp100143_c0_seq2	563.56	512.14	13	1.55	1.11
comp100144_c0	comp100144_c0_seq2,comp100144_c0_seq3,comp100144_c0_seq4,comp100144_c0_seq5	2114.19	2062.74	511.9	15	10.75
comp100145_c0	comp100145_c0_seq1,comp100145_c0_seq2,comp100145_c0_seq3,comp100145_c0_seq4,comp100145_c0_seq5	1461.15	1409.69	271.59	11.66	8.35
comp100146_c0	comp100146_c0_seq1	644	592.56	4	0.41	0.29
comp100146_c1	comp100146_c1_seq1,comp100146_c1_seq2,comp100146_c1_seq3,comp100146_c1_seq5	642.75	591.31	0	0	0
comp100147_c0	comp100147_c0_seq1,comp100147_c0_seq2	677.11	625.67	92	8.94	6.41
comp100147_c1	comp100147_c1_seq2,comp100147_c1_seq3,comp100147_c1_seq5	560.25	508.82	33	3.95	2.83
comp100148_c1	comp100148_c1_seq1	734	682.55	14	1.25	0.89
comp100148_c2	comp100148_c2_seq1,comp100148_c2_seq2,comp100148_c2_seq3	1943.78	1892.32	269.06	8.59	6.16
comp100149_c0	comp100149_c0_seq2,comp100149_c0_seq3,comp100149_c0_seq4,comp100149_c0_seq5	1104.87	1053.41	14	0.81	0.58
comp100150_c0	comp100150_c0_seq1	1132	1080.54	74	4.15	2.97
comp100150_c1	comp100150_c1_seq1,comp100150_c1_seq2	2178.48	2127.02	438	12.44	8.92
comp100150_c2	comp100150_c2_seq1,comp100150_c2_seq3,comp100150_c2_seq4,comp100150_c2_seq5	3897.91	3846.45	4192.03	65.77	47.13
comp100151_c0	comp100151_c0_seq1,comp100151_c0_seq2	1392	1340.54	12	0.54	0.39
comp100152_c0	comp100152_c0_seq1	678	626.55	19	1.84	1.32
comp100152_c1	comp100152_c1_seq1,comp100152_c1_seq3,comp100152_c1_seq5	1122.74	1071.28	73	4.13	2.96
comp100152_c2	comp100152_c2_seq1,comp100152_c2_seq3,comp100152_c2_seq4,comp100152_c2_seq5	1091.4	1039.96	213.88	12.46	8.93
comp100152_c6	comp100152_c6_seq1	650	598.55	38	3.86	2.77
comp100153_c0	comp100153_c0_seq1,comp100153_c0_seq2,comp100153_c0_seq3	858.21	806.75	65	4.89	3.5
comp100154_c1	comp100154_c1_seq1,comp100154_c1_seq2,comp100154_c1_seq4,comp100154_c1_seq5	1809.54	1758.09	150.99	5.19	3.72
comp100155_c0	comp100155_c0_seq1,comp100155_c0_seq2,comp100155_c0_seq3,comp100155_c0_seq4,comp100155_c0_seq5	1184.37	1132.91	852.61	45.58	32.66
comp100156_c0	comp100156_c0_seq1,comp100156_c0_seq2,comp100156_c0_seq3,comp100156_c0_seq4,comp100156_c0_seq5	1870.41	1818.96	166	5.52	3.95
comp100157_c0	comp100157_c0_seq1,comp100157_c0_seq2,comp100157_c0_seq5	1391.02	1339.56	367.85	16.62	11.91
comp100158_c1	comp100158_c1_seq1,comp100158_c1_seq2,comp100158_c1_seq3,comp100158_c1_seq4,comp100158_c1_seq5	4927.44	4875.99	18945.8	234.41	167.98
comp100159_c0	comp100159_c0_seq1,comp100159_c0_seq2,comp100159_c0_seq3	2016.74	1965.29	143	4.4	3.15
comp100160_c1	comp100160_c1_seq1,comp100160_c1_seq2,comp100160_c1_seq3,comp100160_c1_seq4,comp100160_c1_seq5	1132.91	1081.46	480	26.89	19.27
comp100160_c3	comp100160_c3_seq1,comp100160_c3_seq2	857	805.54	19	1.43	1.03
comp100160_c4	comp100160_c4_seq1,comp100160_c4_seq2,comp100160_c4_seq3,comp100160_c4_seq4,comp100160_c4_seq5	2428.55	2377.09	532.98	13.54	9.71
comp100161_c2	comp100161_c2_seq1,comp100161_c2_seq2,comp100161_c2_seq3,comp100161_c2_seq4,comp100161_c2_seq5	887.74	836.29	344.81	25.02	17.93
comp1001616_c0	comp1001616_c0_seq1	624	572.56	0	0	0
comp100162_c0	comp100162_c0_seq1,comp100162_c0_seq2,comp100162_c0_seq3,comp100162_c0_seq4	1735.99	1684.54	110	3.95	2.83
comp100162_c2	comp100162_c2_seq1,comp100162_c2_seq2,comp100162_c2_seq3,comp100162_c2_seq4,comp100162_c2_seq5	1756.1	1704.64	105	3.72	2.67
comp100163_c0	comp100163_c0_seq1,comp100163_c0_seq2,comp100163_c0_seq3,comp100163_c0_seq4,comp100163_c0_seq5	1268.76	1217.3	538	26.76	19.18
comp100163_c1	comp100163_c1_seq1,comp100163_c1_seq2,comp100163_c1_seq3,comp100163_c1_seq4,comp100163_c1_seq5	1485.55	1434.1	612.66	25.85	18.52
comp100164_c1	comp100164_c1_seq1,comp100164_c1_seq2,comp100164_c1_seq4,comp100164_c1_seq5	1051.52	1000.07	6	0.36	0.26
comp100165_c0	comp100165_c0_seq1	1456	1404.54	581.07	25.03	17.94
comp100165_c1	comp100165_c1_seq1	712	660.55	350	32.2	23.08
comp100165_c2	comp100165_c2_seq1	2257	2205.54	363	9.94	7.13
comp100166_c0	comp100166_c0_seq1	1634	1582.54	2	0.08	0.05
comp100166_c1	comp100166_c1_seq1	733	681.55	1	0.09	0.06
comp100166_c2	comp100166_c2_seq1,comp100166_c2_seq2,comp100166_c2_seq3,comp100166_c2_seq4,comp100166_c2_seq5	1006.35	954.89	22	1.4	1
comp100166_c3	comp100166_c3_seq1	559	507.57	0	0	0
comp100167_c0	comp100167_c0_seq1,comp100167_c0_seq2,comp100167_c0_seq3	2226.13	2174.67	243	6.75	4.84
comp100168_c0	comp100168_c0_seq3,comp100168_c0_seq4,comp100168_c0_seq5	1520.63	1469.17	234	9.64	6.91
comp100168_c1	comp100168_c1_seq1	2987	2935.54	334	6.87	4.92
comp100169_c0	comp100169_c0_seq1,comp100169_c0_seq2,comp100169_c0_seq3,comp100169_c0_seq4,comp100169_c0_seq5	3246.27	3194.81	1133.29	21.41	15.35
comp100170_c0	comp100170_c0_seq1,comp100170_c0_seq2,comp100170_c0_seq3,comp100170_c0_seq4	773.08	721.63	22	1.85	1.33
comp100171_c0	comp100171_c0_seq1	3144	3092.54	1557.86	30.41	21.79
comp100172_c0	comp100172_c0_seq1,comp100172_c0_seq2,comp100172_c0_seq4	810.46	759	55	4.4	3.15
comp100172_c1	comp100172_c1_seq2,comp100172_c1_seq5	650.02	598.58	53.72	5.46	3.91
comp100173_c0	comp100173_c0_seq1	1939	1887.54	759.09	24.31	17.42
comp100174_c0	comp100174_c0_seq1,comp100174_c0_seq2,comp100174_c0_seq3,comp100174_c0_seq4,comp100174_c0_seq5	2135.79	2084.33	970	28.12	20.15
comp100174_c1	comp100174_c1_seq1,comp100174_c1_seq2,comp100174_c1_seq3,comp100174_c1_seq4,comp100174_c1_seq5	3040.18	2988.72	571	11.53	8.27
comp100174_c2	comp100174_c2_seq1,comp100174_c2_seq3	977.25	925.8	20	1.31	0.94
comp100174_c3	comp100174_c3_seq1	523	471.58	19	2.46	1.76
comp100174_c4	comp100174_c4_seq1	1278	1226.54	25	1.23	0.88
comp100174_c5	comp100174_c5_seq1	516	464.58	8	1.05	0.75
comp100175_c0	comp100175_c0_seq1,comp100175_c0_seq2,comp100175_c0_seq3,comp100175_c0_seq4,comp100175_c0_seq5	2485.33	2433.87	947	23.5	16.84
comp100176_c0	comp100176_c0_seq1,comp100176_c0_seq2,comp100176_c0_seq3,comp100176_c0_seq4,comp100176_c0_seq5	685.96	634.52	203	19.45	13.94
comp100176_c1	comp100176_c1_seq1	850	798.54	45.94	3.49	2.5
comp100176_c2	comp100176_c2_seq1	597	545.56	0	0	0
comp100177_c0	comp100177_c0_seq1	1341	1289.54	24	1.13	0.81
comp100178_c0	comp100178_c0_seq1	3406	3354.54	77	1.39	0.99
comp100178_c1	comp100178_c1_seq1	730	678.55	13	1.16	0.83
comp100179_c0	comp100179_c0_seq1,comp100179_c0_seq2,comp100179_c0_seq3,comp100179_c0_seq4,comp100179_c0_seq5	1755.31	1703.85	1048.13	37.2	26.65
comp100179_c1	comp100179_c1_seq1	606	554.56	96	10.54	7.55
comp100180_c0	comp100180_c0_seq1	837	785.54	3	0.23	0.17
comp100180_c1	comp100180_c1_seq1,comp100180_c1_seq2,comp100180_c1_seq3,comp100180_c1_seq4,comp100180_c1_seq5	4938.91	4887.46	497.98	6.15	4.4
comp100181_c0	comp100181_c0_seq1,comp100181_c0_seq2,comp100181_c0_seq3,comp100181_c0_seq4,comp100181_c0_seq5	1169	1117.55	33	1.79	1.28
comp100181_c1	comp100181_c1_seq1,comp100181_c1_seq2	885	833.54	42	3.06	2.19
comp100181_c2	comp100181_c2_seq1,comp100181_c2_seq2,comp100181_c2_seq3	805.94	754.48	39	3.14	2.25
comp100181_c3	comp100181_c3_seq1,comp100181_c3_seq2,comp100181_c3_seq3	1044.96	993.51	5	0.31	0.22
comp100182_c2	comp100182_c2_seq2,comp100182_c2_seq4,comp100182_c2_seq5	863.07	811.61	12	0.9	0.64
comp100183_c1	comp100183_c1_seq1	828	776.54	60	4.69	3.36
comp100183_c3	comp100183_c3_seq1,comp100183_c3_seq2,comp100183_c3_seq3,comp100183_c3_seq4,comp100183_c3_seq5	1369.9	1318.44	522.48	23.98	17.19
comp100184_c2	comp100184_c2_seq1,comp100184_c2_seq2	751	699.55	31	2.69	1.93
comp100184_c3	comp100184_c3_seq1,comp100184_c3_seq2,comp100184_c3_seq3,comp100184_c3_seq4	807.1	755.65	95	7.63	5.47
comp100185_c0	comp100185_c0_seq1,comp100185_c0_seq2,comp100185_c0_seq3,comp100185_c0_seq4,comp100185_c0_seq5	2245.36	2193.9	583	16.06	11.51
comp100186_c0	comp100186_c0_seq1,comp100186_c0_seq2,comp100186_c0_seq3	4137.68	4086.22	1036.03	15.3	10.96
comp100187_c0	comp100187_c0_seq1,comp100187_c0_seq2,comp100187_c0_seq3,comp100187_c0_seq4,comp100187_c0_seq5	1148.24	1096.78	81	4.47	3.21
comp100188_c0	comp100188_c0_seq1	733	681.55	1	0.09	0.06
comp100188_c1	comp100188_c1_seq1,comp100188_c1_seq3,comp100188_c1_seq4,comp100188_c1_seq5	2195.6	2144.14	71	2	1.43
comp100188_c2	comp100188_c2_seq1	657	605.55	1	0.1	0.07
comp100189_c1	comp100189_c1_seq1	795	743.54	90.9	7.42	5.32
comp100190_c0	comp100190_c0_seq1	547	495.57	18	2.21	1.59
comp100190_c1	comp100190_c1_seq2,comp100190_c1_seq3,comp100190_c1_seq4,comp100190_c1_seq5	920.01	868.55	61	4.26	3.05
comp100191_c0	comp100191_c0_seq1,comp100191_c0_seq2,comp100191_c0_seq3,comp100191_c0_seq4,comp100191_c0_seq5	1463.47	1412.02	308.07	13.2	9.46
comp100191_c2	comp100191_c2_seq1,comp100191_c2_seq2	982	930.54	34	2.22	1.59
comp100192_c0	comp100192_c0_seq1,comp100192_c0_seq2,comp100192_c0_seq3,comp100192_c0_seq4,comp100192_c0_seq5	1131.04	1079.58	151.58	8.51	6.1
comp100192_c1	comp100192_c1_seq1	660	608.55	0	0	0
comp100193_c0	comp100193_c0_seq1,comp100193_c0_seq2,comp100193_c0_seq4,comp100193_c0_seq5	1208.96	1157.5	54	2.83	2.02
comp100194_c0	comp100194_c0_seq1,comp100194_c0_seq2,comp100194_c0_seq3,comp100194_c0_seq4,comp100194_c0_seq5	1341.93	1290.47	116	5.44	3.9
comp100195_c0	comp100195_c0_seq1	1720	1668.54	6	0.22	0.16
comp100195_c1	comp100195_c1_seq1	1994	1942.54	61	1.9	1.36
comp100196_c0	comp100196_c0_seq1,comp100196_c0_seq2	3544.58	3493.12	1263.54	21.83	15.65
comp100197_c0	comp100197_c0_seq1,comp100197_c0_seq2	1234	1182.54	5	0.26	0.18
comp100197_c1	comp100197_c1_seq2,comp100197_c1_seq3,comp100197_c1_seq4,comp100197_c1_seq5	2459.54	2408.08	347	8.7	6.24
comp100198_c0	comp100198_c0_seq1,comp100198_c0_seq2,comp100198_c0_seq3,comp100198_c0_seq4,comp100198_c0_seq5	3158.71	3107.26	385.92	7.5	5.37
comp100199_c0	comp100199_c0_seq1,comp100199_c0_seq2	1145	1093.54	18	1	0.71
comp100199_c1	comp100199_c1_seq1,comp100199_c1_seq2,comp100199_c1_seq3	1290.89	1239.44	1963.67	95.92	68.74
comp100200_c0	comp100200_c0_seq1,comp100200_c0_seq2,comp100200_c0_seq3,comp100200_c0_seq5	655.98	604.54	11	1.11	0.79
comp100201_c0	comp100201_c0_seq1	608	556.56	62	6.78	4.86
comp100201_c2	comp100201_c2_seq1,comp100201_c2_seq2,comp100201_c2_seq3,comp100201_c2_seq5	1334.71	1283.25	286	13.49	9.67
comp100202_c0	comp100202_c0_seq1,comp100202_c0_seq2,comp100202_c0_seq3,comp100202_c0_seq4	554.59	503.16	96	11.63	8.33
comp100203_c0	comp100203_c0_seq1	502	450.58	1	0.14	0.1
comp100203_c1	comp100203_c1_seq1,comp100203_c1_seq2,comp100203_c1_seq3,comp100203_c1_seq4,comp100203_c1_seq5	2157.53	2106.07	680.02	19.51	13.98
comp100204_c0	comp100204_c0_seq1,comp100204_c0_seq2,comp100204_c0_seq3,comp100204_c0_seq4	1955.18	1903.72	757.02	24.04	17.22
comp100205_c0	comp100205_c0_seq1,comp100205_c0_seq2,comp100205_c0_seq3,comp100205_c0_seq4,comp100205_c0_seq5	1758.99	1707.53	229.64	8.13	5.83
comp100206_c0	comp100206_c0_seq1,comp100206_c0_seq2,comp100206_c0_seq3,comp100206_c0_seq5	625	573.56	14	1.49	1.06
comp100206_c2	comp100206_c2_seq1	931	879.54	0	0	0
comp100206_c3	comp100206_c3_seq1	723	671.55	11	1	0.71
comp100207_c0	comp100207_c0_seq1,comp100207_c0_seq2,comp100207_c0_seq3,comp100207_c0_seq4	2400.43	2348.97	68	1.75	1.25
comp100208_c0	comp100208_c0_seq1,comp100208_c0_seq2,comp100208_c0_seq3,comp100208_c0_seq4,comp100208_c0_seq5	1445.46	1394	512.14	22.23	15.93
comp100209_c0	comp100209_c0_seq1	1161	1109.54	24	1.31	0.94
comp100209_c1	comp100209_c1_seq1,comp100209_c1_seq2,comp100209_c1_seq3,comp100209_c1_seq4	668.18	616.74	16.01	1.58	1.13
comp10021_c1	comp10021_c1_seq1	1320	1268.54	0	0	0
comp100210_c0	comp100210_c0_seq1,comp100210_c0_seq2,comp100210_c0_seq4,comp100210_c0_seq5	592.07	540.64	53	5.97	4.28
comp100210_c2	comp100210_c2_seq1,comp100210_c2_seq4,comp100210_c2_seq5	953.29	901.83	102	6.86	4.92
comp100210_c4	comp100210_c4_seq1,comp100210_c4_seq2	635	583.56	44	4.59	3.29
comp100210_c5	comp100210_c5_seq1	557	505.57	38	4.58	3.28
comp100211_c0	comp100211_c0_seq1,comp100211_c0_seq2,comp100211_c0_seq3	2690	2638.54	1669.59	38.21	27.39
comp100212_c0	comp100212_c0_seq1,comp100212_c0_seq2,comp100212_c0_seq3,comp100212_c0_seq4,comp100212_c0_seq5	1131.69	1080.23	146.9	8.24	5.9
comp100212_c1	comp100212_c1_seq1,comp100212_c1_seq2,comp100212_c1_seq3,comp100212_c1_seq4,comp100212_c1_seq5	2222.6	2171.14	0	0	0
comp100213_c0	comp100213_c0_seq1	1296	1244.54	7	0.34	0.24
comp100214_c0	comp100214_c0_seq1	997	945.54	4	0.26	0.18
comp100214_c2	comp100214_c2_seq1,comp100214_c2_seq2,comp100214_c2_seq4,comp100214_c2_seq5	652.09	600.66	49	4.96	3.56
comp100215_c0	comp100215_c0_seq1	1575	1523.54	400.65	15.91	11.4
comp100216_c2	comp100216_c2_seq1,comp100216_c2_seq2	549	497.57	4	0.49	0.35
comp100216_c4	comp100216_c4_seq1,comp100216_c4_seq2,comp100216_c4_seq3	1126.54	1075.09	49	2.76	1.98
comp100216_c5	comp100216_c5_seq3,comp100216_c5_seq4,comp100216_c5_seq5	629.22	577.78	33	3.48	2.49
comp100216_c6	comp100216_c6_seq1,comp100216_c6_seq2	592	540.56	8	0.9	0.65
comp100217_c0	comp100217_c0_seq1	664	612.55	13	1.29	0.92
comp100217_c1	comp100217_c1_seq1,comp100217_c1_seq2,comp100217_c1_seq3	1533.69	1482.23	68	2.78	1.99
comp100218_c0	comp100218_c0_seq1,comp100218_c0_seq2,comp100218_c0_seq3,comp100218_c0_seq4,comp100218_c0_seq5	2428.15	2376.7	341.94	8.69	6.23
comp100218_c1	comp100218_c1_seq1,comp100218_c1_seq3,comp100218_c1_seq4	1692.22	1640.76	57	2.1	1.51
comp100218_c2	comp100218_c2_seq1	997	945.54	2	0.13	0.09
comp100219_c0	comp100219_c0_seq1,comp100219_c0_seq2,comp100219_c0_seq3,comp100219_c0_seq4,comp100219_c0_seq5	1101.92	1050.46	254.01	14.65	10.5
comp100220_c2	comp100220_c2_seq1,comp100220_c2_seq2,comp100220_c2_seq4,comp100220_c2_seq5	1417.63	1366.17	281	12.45	8.92
comp100221_c0	comp100221_c0_seq1,comp100221_c0_seq4	1300.94	1249.48	94	4.55	3.26
comp100222_c0	comp100222_c0_seq1,comp100222_c0_seq2,comp100222_c0_seq3	2815.01	2763.56	1989.87	43.48	31.16
comp100223_c0	comp100223_c0_seq1,comp100223_c0_seq2,comp100223_c0_seq3	935.8	884.34	83	5.69	4.08
comp100223_c1	comp100223_c1_seq1,comp100223_c1_seq4,comp100223_c1_seq5	654.73	603.3	26	2.62	1.88
comp100224_c0	comp100224_c0_seq1	2403	2351.54	1959	50.32	36.06
comp100225_c1	comp100225_c1_seq1,comp100225_c1_seq3,comp100225_c1_seq5	789.96	738.51	71	5.84	4.18
comp100226_c0	comp100226_c0_seq1	5079	5027.54	3978.55	47.74	34.21
comp1002262_c0	comp1002262_c0_seq1	537	485.57	4	0.5	0.36
comp100227_c0	comp100227_c0_seq2,comp100227_c0_seq3,comp100227_c0_seq4,comp100227_c0_seq5	1726.35	1674.89	415.23	14.99	10.74
comp100227_c1	comp100227_c1_seq1	1464	1412.54	68	2.91	2.09
comp100228_c0	comp100228_c0_seq2	669	617.55	15	1.48	1.06
comp100228_c1	comp100228_c1_seq1,comp100228_c1_seq2,comp100228_c1_seq3,comp100228_c1_seq4	1143.3	1091.85	122	6.77	4.85
comp100228_c2	comp100228_c2_seq1,comp100228_c2_seq2,comp100228_c2_seq4	1299.75	1248.29	89	4.32	3.09
comp100228_c3	comp100228_c3_seq1	631	579.56	5	0.52	0.38
comp100228_c5	comp100228_c5_seq1,comp100228_c5_seq3	1235.08	1183.63	79	4.04	2.9
comp100229_c0	comp100229_c0_seq1	1468	1416.54	361	15.42	11.05
comp1002294_c0	comp1002294_c0_seq1	600	548.56	2	0.22	0.16
comp10023_c0	comp10023_c0_seq1	806	754.54	1	0.08	0.06
comp100230_c0	comp100230_c0_seq1,comp100230_c0_seq2,comp100230_c0_seq3,comp100230_c0_seq4	1657.49	1606.03	467	17.59	12.6
comp100231_c0	comp100231_c0_seq1,comp100231_c0_seq2,comp100231_c0_seq3,comp100231_c0_seq4,comp100231_c0_seq5	1340.36	1288.91	84	3.94	2.83
comp100231_c1	comp100231_c1_seq2	541	489.57	10	1.24	0.89
comp100232_c0	comp100232_c0_seq1,comp100232_c0_seq2,comp100232_c0_seq3	1344.94	1293.48	538	25.18	18.04
comp100233_c0	comp100233_c0_seq1,comp100233_c0_seq2,comp100233_c0_seq3,comp100233_c0_seq4	895.34	843.88	97	6.97	5
comp100234_c0	comp100234_c0_seq1,comp100234_c0_seq2,comp100234_c0_seq3,comp100234_c0_seq4,comp100234_c0_seq5	1489.4	1437.94	107	4.5	3.23
comp100235_c0	comp100235_c0_seq1,comp100235_c0_seq2,comp100235_c0_seq3,comp100235_c0_seq4,comp100235_c0_seq5	1732.43	1680.97	2799.95	100.72	72.18
comp100236_c0	comp100236_c0_seq1,comp100236_c0_seq2,comp100236_c0_seq3,comp100236_c0_seq4	2102.41	2050.95	422	12.43	8.91
comp100237_c2	comp100237_c2_seq1,comp100237_c2_seq2,comp100237_c2_seq3,comp100237_c2_seq4,comp100237_c2_seq5	1987.53	1936.07	598	18.67	13.38
comp100238_c0	comp100238_c0_seq1,comp100238_c0_seq3	699.47	648.02	73	6.85	4.91
comp100238_c1	comp100238_c1_seq1	533	481.57	3	0.38	0.27
comp100238_c2	comp100238_c2_seq1	645	593.55	20	2.05	1.47
comp100239_c0	comp100239_c0_seq1,comp100239_c0_seq2,comp100239_c0_seq4,comp100239_c0_seq5	1270.23	1218.77	303.95	15.1	10.82
comp100240_c0	comp100240_c0_seq1,comp100240_c0_seq2,comp100240_c0_seq3,comp100240_c0_seq5	863.64	812.18	124.25	9.28	6.65
comp100240_c2	comp100240_c2_seq1,comp100240_c2_seq2,comp100240_c2_seq3,comp100240_c2_seq4	1108.54	1057.1	180	10.32	7.39
comp100241_c0	comp100241_c0_seq1,comp100241_c0_seq2	2115	2063.54	6083.14	178.14	127.66
comp100242_c0	comp100242_c0_seq1,comp100242_c0_seq2,comp100242_c0_seq3,comp100242_c0_seq4	2524.61	2473.15	143	3.49	2.5
comp100243_c0	comp100243_c0_seq1,comp100243_c0_seq2,comp100243_c0_seq3,comp100243_c0_seq4,comp100243_c0_seq5	872.63	821.18	79	5.84	4.18
comp100243_c1	comp100243_c1_seq1,comp100243_c1_seq2	920.88	869.43	68	4.74	3.4
comp100243_c2	comp100243_c2_seq1	1240	1188.54	23	1.17	0.84
comp100244_c0	comp100244_c0_seq1,comp100244_c0_seq2	1185.64	1134.18	120	6.41	4.59
comp100244_c1	comp100244_c1_seq1,comp100244_c1_seq2,comp100244_c1_seq3,comp100244_c1_seq4,comp100244_c1_seq5	2744.15	2692.69	2100.73	47.11	33.76
comp100246_c0	comp100246_c0_seq1,comp100246_c0_seq2,comp100246_c0_seq3,comp100246_c0_seq4,comp100246_c0_seq5	2572.26	2520.8	1990.21	47.68	34.17
comp100247_c0	comp100247_c0_seq1,comp100247_c0_seq2	1569	1517.54	72.95	2.91	2.08
comp100248_c0	comp100248_c0_seq1,comp100248_c0_seq2,comp100248_c0_seq3,comp100248_c0_seq4,comp100248_c0_seq5	977.02	925.56	237.18	15.54	11.13
comp100249_c0	comp100249_c0_seq1	1024	972.54	63.97	3.99	2.86
comp100249_c1	comp100249_c1_seq1,comp100249_c1_seq2,comp100249_c1_seq3,comp100249_c1_seq4,comp100249_c1_seq5	1078.85	1027.39	72	4.25	3.04
comp100249_c2	comp100249_c2_seq1	500	448.58	0	0	0
comp100249_c3	comp100249_c3_seq1	784	732.54	14	1.16	0.83
comp100250_c0	comp100250_c0_seq1	2501	2449.54	118.08	2.91	2.09
comp100251_c0	comp100251_c0_seq1,comp100251_c0_seq2,comp100251_c0_seq3,comp100251_c0_seq4,comp100251_c0_seq5	1964.1	1912.64	129.26	4.08	2.93
comp100252_c0	comp100252_c0_seq1	1971	1919.54	31.99	1.01	0.72
comp100254_c2	comp100254_c2_seq2	601	549.56	6	0.66	0.48
comp100254_c3	comp100254_c3_seq1,comp100254_c3_seq2,comp100254_c3_seq3,comp100254_c3_seq4,comp100254_c3_seq5	1149.76	1098.31	292.01	16.11	11.54
comp100255_c0	comp100255_c0_seq1,comp100255_c0_seq2,comp100255_c0_seq3,comp100255_c0_seq4,comp100255_c0_seq5	1238.42	1186.96	94	4.8	3.44
comp100256_c0	comp100256_c0_seq1	803	751.54	7	0.57	0.41
comp100257_c0	comp100257_c0_seq2	993	941.54	7	0.45	0.32
comp100258_c0	comp100258_c0_seq1,comp100258_c0_seq2,comp100258_c0_seq3,comp100258_c0_seq4,comp100258_c0_seq5	2646.01	2594.56	95	2.21	1.58
comp1002583_c0	comp1002583_c0_seq1	527	475.58	1	0.13	0.09
comp100259_c0	comp100259_c0_seq1,comp100259_c0_seq2	1767.24	1715.78	427	15.05	10.78
comp10026_c0	comp10026_c0_seq1	823	771.54	11	0.87	0.62
comp100260_c1	comp100260_c1_seq1,comp100260_c1_seq2,comp100260_c1_seq3,comp100260_c1_seq4,comp100260_c1_seq5	1569.53	1518.07	425.08	16.94	12.14
comp100260_c3	comp100260_c3_seq1,comp100260_c3_seq2,comp100260_c3_seq3,comp100260_c3_seq4,comp100260_c3_seq5	5170.67	5119.22	2305.31	27.17	19.47
comp100261_c0	comp100261_c0_seq1	618	566.56	1	0.11	0.08
comp100261_c1	comp100261_c1_seq1,comp100261_c1_seq2,comp100261_c1_seq3,comp100261_c1_seq4,comp100261_c1_seq5	3588.82	3537.36	3454.17	58.94	42.24
comp100262_c0	comp100262_c0_seq1,comp100262_c0_seq2,comp100262_c0_seq3,comp100262_c0_seq4	2074.77	2023.32	575.02	17.17	12.31
comp100262_c1	comp100262_c1_seq1	609	557.56	11	1.2	0.86
comp100262_c2	comp100262_c2_seq1	611	559.56	0	0	0
comp100263_c0	comp100263_c0_seq1	1964	1912.54	695.41	21.98	15.75
comp100264_c0	comp100264_c0_seq1,comp100264_c0_seq2,comp100264_c0_seq3,comp100264_c0_seq4	1402.86	1351.4	184.99	8.28	5.94
comp1002647_c0	comp1002647_c0_seq1	661	609.55	4	0.4	0.29
comp100265_c0	comp100265_c0_seq1	1175	1123.54	8	0.43	0.31
comp100266_c0	comp100266_c0_seq1,comp100266_c0_seq2	1505	1453.54	91.49	3.81	2.73
comp100267_c1	comp100267_c1_seq1	625	573.56	14	1.49	1.06
comp100267_c2	comp100267_c2_seq1	590	538.56	7	0.79	0.57
comp100267_c3	comp100267_c3_seq1,comp100267_c3_seq2,comp100267_c3_seq4,comp100267_c3_seq5	1254.52	1203.06	229	11.53	8.26
comp100267_c4	comp100267_c4_seq1	884	832.54	58	4.23	3.03
comp100267_c5	comp100267_c5_seq2,comp100267_c5_seq4	813.97	762.51	13	1.04	0.74
comp100268_c0	comp100268_c0_seq1,comp100268_c0_seq2,comp100268_c0_seq3,comp100268_c0_seq4,comp100268_c0_seq5	1631.66	1580.21	214.62	8.21	5.89
comp100268_c1	comp100268_c1_seq1	538	486.57	7	0.88	0.63
comp100269_c0	comp100269_c0_seq1,comp100269_c0_seq2,comp100269_c0_seq3,comp100269_c0_seq4,comp100269_c0_seq5	986.88	935.43	72	4.67	3.34
comp100270_c0	comp100270_c0_seq1	2963	2911.54	1032.12	21.4	15.34
comp100271_c0	comp100271_c0_seq1,comp100271_c0_seq2,comp100271_c0_seq3,comp100271_c0_seq5	1202.4	1150.94	620	32.62	23.38
comp100271_c1	comp100271_c1_seq1	1529	1477.54	649	26.57	19.04
comp100271_c2	comp100271_c2_seq1	641	589.56	2	0.21	0.15
comp100272_c0	comp100272_c0_seq1,comp100272_c0_seq2,comp100272_c0_seq3,comp100272_c0_seq4	3798.65	3747.19	296.01	4.77	3.42
comp100273_c0	comp100273_c0_seq1	2400	2348.54	11519	296.29	212.33
comp100274_c0	comp100274_c0_seq1	1741	1689.54	9	0.32	0.23
comp100275_c0	comp100275_c0_seq1,comp100275_c0_seq2	924.15	872.7	153	10.63	7.62
comp100275_c1	comp100275_c1_seq1	639	587.56	32.18	3.33	2.39
comp100275_c2	comp100275_c2_seq1,comp100275_c2_seq2	1914.84	1863.38	29	0.94	0.67
comp100275_c3	comp100275_c3_seq1,comp100275_c3_seq2,comp100275_c3_seq3,comp100275_c3_seq4	1694.76	1643.3	65.03	2.39	1.71
comp100275_c4	comp100275_c4_seq1,comp100275_c4_seq2,comp100275_c4_seq3,comp100275_c4_seq4,comp100275_c4_seq5	1369.27	1317.81	66	3.03	2.17
comp100276_c0	comp100276_c0_seq1,comp100276_c0_seq2,comp100276_c0_seq5	1291.39	1239.94	79	3.86	2.76
comp100277_c0	comp100277_c0_seq1,comp100277_c0_seq2,comp100277_c0_seq3,comp100277_c0_seq5	2615.74	2564.28	21096	496.86	356.06
comp100278_c0	comp100278_c0_seq1,comp100278_c0_seq2	1112.64	1061.19	28	1.6	1.15
comp100278_c1	comp100278_c1_seq1,comp100278_c1_seq2,comp100278_c1_seq3,comp100278_c1_seq4,comp100278_c1_seq5	1064.5	1013.04	51	3.05	2.19
comp100279_c0	comp100279_c0_seq1,comp100279_c0_seq3	566.61	515.18	119	14.07	10.08
comp100280_c0	comp100280_c0_seq1	580	528.56	0	0	0
comp100280_c1	comp100280_c1_seq1,comp100280_c1_seq2,comp100280_c1_seq3,comp100280_c1_seq4	1341.75	1290.29	0	0	0
comp100280_c2	comp100280_c2_seq1,comp100280_c2_seq2,comp100280_c2_seq3,comp100280_c2_seq4,comp100280_c2_seq5	1094.75	1043.3	155	9	6.45
comp100281_c0	comp100281_c0_seq1,comp100281_c0_seq2,comp100281_c0_seq4,comp100281_c0_seq5	1219.47	1168.02	99	5.13	3.68
comp100282_c0	comp100282_c0_seq1,comp100282_c0_seq2,comp100282_c0_seq3	672.14	620.7	43	4.21	3.02
comp100283_c0	comp100283_c0_seq1,comp100283_c0_seq2,comp100283_c0_seq3,comp100283_c0_seq4,comp100283_c0_seq5	2257.63	2206.17	452.55	12.39	8.88
comp100284_c0	comp100284_c0_seq1,comp100284_c0_seq2,comp100284_c0_seq3,comp100284_c0_seq4,comp100284_c0_seq5	2185.21	2133.76	4662.68	132.04	94.62
comp100285_c0	comp100285_c0_seq1	2216	2164.54	55	1.54	1.1
comp100286_c0	comp100286_c0_seq1	816	764.54	21	1.67	1.2
comp100286_c3	comp100286_c3_seq2,comp100286_c3_seq4	955.25	903.79	46	3.09	2.21
comp100287_c0	comp100287_c0_seq1	1034	982.54	11.07	0.68	0.49
comp100287_c2	comp100287_c2_seq1,comp100287_c2_seq2,comp100287_c2_seq3	1962	1910.54	10	0.32	0.23
comp100287_c3	comp100287_c3_seq1	555	503.57	0	0	0
comp100287_c4	comp100287_c4_seq1	583	531.56	8	0.92	0.66
comp100288_c0	comp100288_c0_seq1,comp100288_c0_seq2,comp100288_c0_seq3,comp100288_c0_seq4,comp100288_c0_seq5	983.84	932.38	137.44	8.94	6.4
comp100289_c0	comp100289_c0_seq1,comp100289_c0_seq2,comp100289_c0_seq3,comp100289_c0_seq4,comp100289_c0_seq5	1037.19	985.73	44	2.71	1.94
comp10029_c0	comp10029_c0_seq1	565	513.57	2	0.24	0.17
comp100290_c0	comp100290_c0_seq1	510	458.58	16	2.13	1.53
comp100290_c2	comp100290_c2_seq1,comp100290_c2_seq3	1472	1420.54	39	1.66	1.19
comp100290_c3	comp100290_c3_seq1	651	599.55	6	0.61	0.44
comp100291_c0	comp100291_c0_seq1,comp100291_c0_seq2	698.61	647.16	27	2.54	1.82
comp100291_c1	comp100291_c1_seq1,comp100291_c1_seq2,comp100291_c1_seq3,comp100291_c1_seq4	1265.13	1213.67	111.95	5.59	4
comp100292_c1	comp100292_c1_seq1,comp100292_c1_seq2,comp100292_c1_seq3,comp100292_c1_seq4,comp100292_c1_seq5	863	811.54	3	0.22	0.16
comp100292_c2	comp100292_c2_seq1,comp100292_c2_seq2	1207.22	1155.76	21	1.1	0.79
comp100292_c3	comp100292_c3_seq1,comp100292_c3_seq2,comp100292_c3_seq3,comp100292_c3_seq4,comp100292_c3_seq5	1345.72	1294.28	25	1.17	0.84
comp100293_c0	comp100293_c0_seq1	561	509.57	8	0.96	0.69
comp100293_c1	comp100293_c1_seq1	645	593.55	9	0.92	0.66
comp100293_c2	comp100293_c2_seq1,comp100293_c2_seq2,comp100293_c2_seq3,comp100293_c2_seq4,comp100293_c2_seq5	1710.03	1658.58	1035.98	37.77	27.07
comp100293_c5	comp100293_c5_seq1,comp100293_c5_seq2,comp100293_c5_seq3,comp100293_c5_seq4,comp100293_c5_seq5	888.83	837.38	23	1.67	1.19
comp100293_c6	comp100293_c6_seq1	1152	1100.54	19	1.05	0.75
comp100293_c7	comp100293_c7_seq1,comp100293_c7_seq2	687.36	635.91	65	6.21	4.45
comp100294_c0	comp100294_c0_seq2,comp100294_c0_seq3,comp100294_c0_seq4,comp100294_c0_seq5	3275.46	3224	337.05	6.31	4.52
comp100295_c0	comp100295_c0_seq1,comp100295_c0_seq2,comp100295_c0_seq3	2574.92	2523.46	367	8.78	6.29
comp100296_c0	comp100296_c0_seq2	1549	1497.54	7	0.28	0.2
comp100297_c0	comp100297_c0_seq1,comp100297_c0_seq2,comp100297_c0_seq3,comp100297_c0_seq4,comp100297_c0_seq5	989.65	938.19	252.17	16.3	11.68
comp100298_c0	comp100298_c0_seq1,comp100298_c0_seq2,comp100298_c0_seq3,comp100298_c0_seq5	809	757.54	2	0.16	0.11
comp100299_c0	comp100299_c0_seq1	515	463.58	15	1.97	1.41
comp100299_c1	comp100299_c1_seq1	764	712.54	39	3.32	2.38
comp100299_c3	comp100299_c3_seq1,comp100299_c3_seq3,comp100299_c3_seq4,comp100299_c3_seq5	957.57	906.12	105	7.03	5.04
comp100299_c4	comp100299_c4_seq1,comp100299_c4_seq2,comp100299_c4_seq3,comp100299_c4_seq4,comp100299_c4_seq5	1026.98	975.53	2280.56	141.71	101.55
comp100300_c0	comp100300_c0_seq1	3494	3442.54	1327	23.27	16.67
comp100301_c0	comp100301_c0_seq1,comp100301_c0_seq2,comp100301_c0_seq3,comp100301_c0_seq4,comp100301_c0_seq5	1525.34	1473.88	425.02	17.45	12.5
comp100302_c0	comp100302_c0_seq1	2633	2581.54	1135	26.55	19.03
comp100303_c0	comp100303_c0_seq2,comp100303_c0_seq5	544.61	493.18	17	2.1	1.51
comp100304_c0	comp100304_c0_seq1,comp100304_c0_seq2,comp100304_c0_seq3	1543.65	1492.2	287.8	11.67	8.36
comp100305_c0	comp100305_c0_seq2,comp100305_c0_seq4,comp100305_c0_seq5	855.47	804.01	33.02	2.49	1.79
comp100306_c0	comp100306_c0_seq1	1196	1144.54	1821.96	96.41	69.09
comp100307_c0	comp100307_c0_seq1	781	729.54	13.71	1.14	0.82
comp100308_c0	comp100308_c0_seq1	1121	1069.54	658.42	37.3	26.73
comp100308_c1	comp100308_c1_seq1,comp100308_c1_seq2,comp100308_c1_seq3,comp100308_c1_seq4,comp100308_c1_seq5	1337.67	1286.22	249.87	11.76	8.43
comp100309_c0	comp100309_c0_seq3,comp100309_c0_seq4,comp100309_c0_seq5	1618.12	1566.66	45	1.74	1.24
comp10031_c0	comp10031_c0_seq1	540	488.57	2	0.25	0.18
comp10031_c1	comp10031_c1_seq1	548	496.57	3	0.37	0.26
comp100310_c0	comp100310_c0_seq1	880	828.54	0	0	0
comp100310_c1	comp100310_c1_seq1	940	888.54	15	1.02	0.73
comp100310_c2	comp100310_c2_seq1,comp100310_c2_seq2,comp100310_c2_seq4,comp100310_c2_seq5	4594.46	4543.01	2064.4	27.42	19.65
comp100310_c3	comp100310_c3_seq1	1385	1333.54	11	0.5	0.36
comp100311_c0	comp100311_c0_seq1,comp100311_c0_seq2	2478.92	2427.46	304	7.56	5.42
comp100312_c0	comp100312_c0_seq1	818	766.54	0	0	0
comp100312_c1	comp100312_c1_seq1,comp100312_c1_seq2,comp100312_c1_seq3,comp100312_c1_seq4,comp100312_c1_seq5	2783.06	2731.6	209.11	4.62	3.31
comp100313_c0	comp100313_c0_seq2,comp100313_c0_seq3	1020.57	969.12	133	8.32	5.96
comp100313_c1	comp100313_c1_seq1	1327	1275.54	16	0.76	0.54
comp100313_c2	comp100313_c2_seq1,comp100313_c2_seq2,comp100313_c2_seq5	952.79	901.33	30.99	2.08	1.49
comp100314_c0	comp100314_c0_seq1	900	848.54	81	5.79	4.15
comp1003142_c0	comp1003142_c0_seq1	566	514.57	3	0.36	0.25
comp100315_c0	comp100315_c0_seq1,comp100315_c0_seq2	1136.18	1084.72	34	1.9	1.36
comp100317_c0	comp100317_c0_seq1,comp100317_c0_seq2,comp100317_c0_seq3	2527.54	2476.08	61.02	1.49	1.07
comp100318_c0	comp100318_c0_seq1	1059	1007.54	39	2.35	1.68
comp100319_c0	comp100319_c0_seq1	954	902.54	0	0	0
comp100319_c1	comp100319_c1_seq1,comp100319_c1_seq2,comp100319_c1_seq3,comp100319_c1_seq4,comp100319_c1_seq5	2384.99	2333.54	515	13.33	9.55
comp100319_c2	comp100319_c2_seq3,comp100319_c2_seq4	1216	1164.54	114	5.93	4.25
comp100319_c3	comp100319_c3_seq1	1751	1699.54	0	0	0
comp100320_c0	comp100320_c0_seq2,comp100320_c0_seq3	808	756.54	1.99	0.16	0.11
comp100320_c1	comp100320_c1_seq1,comp100320_c1_seq2,comp100320_c1_seq4	1210	1158.54	10	0.52	0.37
comp100320_c2	comp100320_c2_seq1	607	555.56	13	1.42	1.02
comp100320_c3	comp100320_c3_seq1	942	890.54	3	0.2	0.15
comp100321_c0	comp100321_c0_seq1,comp100321_c0_seq2,comp100321_c0_seq3,comp100321_c0_seq4	654.58	603.14	51	5.14	3.69
comp100322_c0	comp100322_c0_seq2,comp100322_c0_seq3	1503.25	1451.8	166	6.92	4.96
comp100322_c1	comp100322_c1_seq1,comp100322_c1_seq2,comp100322_c1_seq3,comp100322_c1_seq4	2230.3	2178.84	866.93	24.04	17.23
comp100322_c2	comp100322_c2_seq1	611	559.56	6	0.65	0.47
comp100322_c3	comp100322_c3_seq1	836	784.54	59.02	4.57	3.27
comp100323_c0	comp100323_c0_seq1,comp100323_c0_seq2,comp100323_c0_seq3,comp100323_c0_seq5	1008.69	957.24	85.53	5.42	3.88
comp100323_c1	comp100323_c1_seq1,comp100323_c1_seq3	825.8	774.34	38	2.98	2.13
comp100324_c0	comp100324_c0_seq1,comp100324_c0_seq2,comp100324_c0_seq3,comp100324_c0_seq4	1389.65	1338.19	411	18.59	13.32
comp100324_c1	comp100324_c1_seq1	1794	1742.54	59	2.05	1.47
comp100325_c0	comp100325_c0_seq1,comp100325_c0_seq2	3800.75	3749.29	3127.1	50.34	36.07
comp100326_c0	comp100326_c0_seq1,comp100326_c0_seq2,comp100326_c0_seq3,comp100326_c0_seq4	1121.17	1069.71	251	14.22	10.19
comp100327_c1	comp100327_c1_seq3,comp100327_c1_seq4,comp100327_c1_seq5	762.16	710.71	61	5.21	3.74
comp100327_c2	comp100327_c2_seq1,comp100327_c2_seq2	506	454.58	3	0.4	0.29
comp100328_c0	comp100328_c0_seq1	514	462.58	32	4.22	3.02
comp100328_c1	comp100328_c1_seq1,comp100328_c1_seq3,comp100328_c1_seq4,comp100328_c1_seq5	1119.31	1067.86	178	10.1	7.24
comp100328_c2	comp100328_c2_seq1	1425	1373.54	87	3.83	2.75
comp100329_c0	comp100329_c0_seq1,comp100329_c0_seq2	569	517.57	1	0.12	0.08
comp100329_c1	comp100329_c1_seq2,comp100329_c1_seq3,comp100329_c1_seq5	1022.78	971.32	69.69	4.35	3.12
comp100329_c2	comp100329_c2_seq1	512	460.58	36	4.77	3.42
comp100330_c0	comp100330_c0_seq1,comp100330_c0_seq2,comp100330_c0_seq3,comp100330_c0_seq4,comp100330_c0_seq5	919.36	867.91	72.04	5.03	3.61
comp100331_c1	comp100331_c1_seq3	510	458.58	1	0.13	0.1
comp100331_c3	comp100331_c3_seq1	532	480.57	4	0.51	0.36
comp100331_c4	comp100331_c4_seq1	942	890.54	15	1.02	0.73
comp100331_c5	comp100331_c5_seq1	756	704.55	4	0.34	0.25
comp100331_c6	comp100331_c6_seq1	898	846.54	2	0.14	0.1
comp100331_c7	comp100331_c7_seq1	652	600.55	7	0.71	0.51
comp100331_c8	comp100331_c8_seq2,comp100331_c8_seq3,comp100331_c8_seq4,comp100331_c8_seq5	1428.88	1377.42	71	3.12	2.24
comp100331_c9	comp100331_c9_seq1,comp100331_c9_seq3	1555.54	1504.08	101	4.06	2.91
comp100332_c0	comp100332_c0_seq1,comp100332_c0_seq2,comp100332_c0_seq3,comp100332_c0_seq4,comp100332_c0_seq5	1725.41	1673.95	259.72	9.38	6.72
comp100333_c0	comp100333_c0_seq1,comp100333_c0_seq2,comp100333_c0_seq3,comp100333_c0_seq4	603	551.56	6	0.66	0.47
comp1003338_c0	comp1003338_c0_seq1	753	701.55	1	0.09	0.06
comp100334_c1	comp100334_c1_seq1	549	497.57	27	3.31	2.37
comp100334_c3	comp100334_c3_seq1	1107	1055.54	87	4.99	3.58
comp100334_c4	comp100334_c4_seq2,comp100334_c4_seq3,comp100334_c4_seq5	2275.69	2224.23	51	1.39	0.99
comp100335_c0	comp100335_c0_seq1,comp100335_c0_seq2	1969.94	1918.48	22	0.69	0.5
comp100335_c1	comp100335_c1_seq1	875	823.54	25	1.84	1.32
comp100335_c2	comp100335_c2_seq1,comp100335_c2_seq2,comp100335_c2_seq3,comp100335_c2_seq4,comp100335_c2_seq5	2208.11	2156.65	1104.21	30.94	22.17
comp100335_c3	comp100335_c3_seq1,comp100335_c3_seq2	862.61	811.16	17	1.27	0.91
comp100335_c5	comp100335_c5_seq1,comp100335_c5_seq2,comp100335_c5_seq3	1896.6	1845.14	48	1.57	1.13
comp100335_c6	comp100335_c6_seq1	2271	2219.54	51.71	1.41	1.01
comp100335_c7	comp100335_c7_seq1	1221	1169.54	13	0.67	0.48
comp100335_c8	comp100335_c8_seq1	573	521.57	3	0.35	0.25
comp100335_c9	comp100335_c9_seq1	1510	1458.54	18	0.75	0.54
comp100336_c0	comp100336_c0_seq1	1377	1325.54	66	3.01	2.16
comp100337_c1	comp100337_c1_seq1,comp100337_c1_seq2,comp100337_c1_seq3,comp100337_c1_seq4	3367.26	3315.8	1390.25	25.31	18.14
comp100338_c0	comp100338_c0_seq1	3006	2954.54	1217.9	24.89	17.84
comp100339_c0	comp100339_c0_seq1,comp100339_c0_seq2	4076.83	4025.37	1033	15.49	11.1
comp100340_c0	comp100340_c0_seq1	590	538.56	1	0.11	0.08
comp100340_c1	comp100340_c1_seq1,comp100340_c1_seq2,comp100340_c1_seq3,comp100340_c1_seq4,comp100340_c1_seq5	3100.7	3049.24	10	0.2	0.14
comp100341_c0	comp100341_c0_seq1	1034	982.54	139	8.58	6.15
comp100341_c1	comp100341_c1_seq1,comp100341_c1_seq2	1597.88	1546.42	201	7.86	5.63
comp100342_c0	comp100342_c0_seq1,comp100342_c0_seq2	2158.47	2107.01	84	2.41	1.73
comp100343_c1	comp100343_c1_seq1	2683	2631.54	16	0.37	0.26
comp100344_c1	comp100344_c1_seq1,comp100344_c1_seq2,comp100344_c1_seq3,comp100344_c1_seq4,comp100344_c1_seq5	1331.18	1279.72	444.76	21.04	15.08
comp100345_c0	comp100345_c0_seq2,comp100345_c0_seq3,comp100345_c0_seq4,comp100345_c0_seq5	2036.58	1985.12	93.91	2.86	2.05
comp100345_c1	comp100345_c1_seq1	1562	1510.54	116	4.65	3.33
comp100346_c0	comp100346_c0_seq4	602	550.56	9	1	0.71
comp100347_c0	comp100347_c0_seq1,comp100347_c0_seq2	2335.8	2284.34	1263	33.4	23.94
comp100348_c0	comp100348_c0_seq1,comp100348_c0_seq2,comp100348_c0_seq3,comp100348_c0_seq4	2314	2262.55	331.96	8.86	6.35
comp100349_c0	comp100349_c0_seq1	1946	1894.54	10.99	0.35	0.25
comp100350_c0	comp100350_c0_seq1,comp100350_c0_seq2,comp100350_c0_seq3,comp100350_c0_seq4,comp100350_c0_seq5	2911.38	2859.92	198.52	4.19	3
comp100350_c2	comp100350_c2_seq1,comp100350_c2_seq2	2715.12	2663.66	1434.17	32.52	23.3
comp100350_c4	comp100350_c4_seq1,comp100350_c4_seq2,comp100350_c4_seq3,comp100350_c4_seq4,comp100350_c4_seq5	1271.74	1220.28	237.83	11.8	8.46
comp100351_c0	comp100351_c0_seq1,comp100351_c0_seq2,comp100351_c0_seq3,comp100351_c0_seq4	3183.22	3131.76	5389.78	103.9	74.46
comp100352_c2	comp100352_c2_seq1	870	818.54	19	1.41	1.01
comp100352_c3	comp100352_c3_seq1,comp100352_c3_seq2,comp100352_c3_seq3,comp100352_c3_seq4,comp100352_c3_seq5	841.89	790.43	102	7.83	5.61
comp100352_c4	comp100352_c4_seq1,comp100352_c4_seq2,comp100352_c4_seq5	712.29	660.85	43	3.95	2.83
comp100353_c0	comp100353_c0_seq1,comp100353_c0_seq2,comp100353_c0_seq3,comp100353_c0_seq4,comp100353_c0_seq5	592.57	541.14	150.25	16.9	12.11
comp100354_c0	comp100354_c0_seq2,comp100354_c0_seq3,comp100354_c0_seq4,comp100354_c0_seq5	759.29	707.83	105	9.01	6.46
comp100355_c0	comp100355_c0_seq1,comp100355_c0_seq2	1685	1633.54	24.07	0.89	0.64
comp100356_c3	comp100356_c3_seq1	690	638.55	22	2.09	1.5
comp100356_c4	comp100356_c4_seq1	707	655.55	13	1.21	0.86
comp100356_c5	comp100356_c5_seq1,comp100356_c5_seq2,comp100356_c5_seq3,comp100356_c5_seq4	4776	4724.54	119.22	1.52	1.09
comp100357_c1	comp100357_c1_seq1,comp100357_c1_seq2,comp100357_c1_seq3,comp100357_c1_seq4,comp100357_c1_seq5	1074.66	1023.21	128.99	7.64	5.47
comp100358_c0	comp100358_c0_seq1,comp100358_c0_seq2,comp100358_c0_seq3,comp100358_c0_seq4,comp100358_c0_seq5	646.35	594.9	31	3.17	2.27
comp100358_c1	comp100358_c1_seq1,comp100358_c1_seq2,comp100358_c1_seq3,comp100358_c1_seq4,comp100358_c1_seq5	1043.4	991.95	255.06	15.58	11.17
comp100358_c2	comp100358_c2_seq1	1340	1288.54	47	2.21	1.58
comp100358_c5	comp100358_c5_seq1	545	493.57	0	0	0
comp100359_c0	comp100359_c0_seq1,comp100359_c0_seq2,comp100359_c0_seq3,comp100359_c0_seq4,comp100359_c0_seq5	713.68	662.23	254.91	23.39	16.77
comp100360_c0	comp100360_c0_seq1,comp100360_c0_seq2,comp100360_c0_seq3,comp100360_c0_seq4,comp100360_c0_seq5	1113.63	1062.17	67.01	3.82	2.74
comp100360_c1	comp100360_c1_seq3,comp100360_c1_seq4,comp100360_c1_seq5	629.66	578.23	73	7.68	5.51
comp100361_c0	comp100361_c0_seq1,comp100361_c0_seq2,comp100361_c0_seq3,comp100361_c0_seq4,comp100361_c0_seq5	1429.17	1377.72	276.5	12.14	8.7
comp100361_c7	comp100361_c7_seq1,comp100361_c7_seq2	588	536.56	6	0.68	0.49
comp100362_c0	comp100362_c0_seq1	640	588.56	198.84	20.55	14.73
comp100362_c1	comp100362_c1_seq2,comp100362_c1_seq3,comp100362_c1_seq4,comp100362_c1_seq5	1762.29	1710.84	30	1.06	0.76
comp100362_c3	comp100362_c3_seq1	935	883.54	333.99	22.93	16.43
comp100363_c0	comp100363_c0_seq1	1502	1450.54	13	0.54	0.39
comp100363_c1	comp100363_c1_seq1,comp100363_c1_seq2,comp100363_c1_seq3	3011.1	2959.65	25	0.51	0.37
comp100363_c2	comp100363_c2_seq1,comp100363_c2_seq2,comp100363_c2_seq3	678.99	627.55	29	2.81	2.01
comp100363_c3	comp100363_c3_seq1	1148	1096.54	0	0	0
comp100364_c0	comp100364_c0_seq1,comp100364_c0_seq2	1556.07	1504.61	930.09	37.39	26.8
comp100364_c1	comp100364_c1_seq1	2275	2223.54	1609.04	43.72	31.33
comp100365_c0	comp100365_c0_seq1,comp100365_c0_seq2	3774.47	3723.01	833.03	13.5	9.68
comp100366_c0	comp100366_c0_seq1,comp100366_c0_seq2,comp100366_c0_seq3,comp100366_c0_seq4,comp100366_c0_seq5	1584.23	1532.78	3	0.12	0.08
comp100366_c2	comp100366_c2_seq1	547	495.57	22	2.71	1.94
comp100367_c0	comp100367_c0_seq1,comp100367_c0_seq2	631.66	580.22	5	0.52	0.38
comp100367_c3	comp100367_c3_seq1,comp100367_c3_seq2,comp100367_c3_seq3,comp100367_c3_seq4,comp100367_c3_seq5	3158.9	3107.44	977.5	18.99	13.61
comp100368_c0	comp100368_c0_seq1,comp100368_c0_seq2	1671.88	1620.42	383.07	14.3	10.25
comp100369_c0	comp100369_c0_seq1	2205	2153.54	102	2.86	2.05
comp100370_c0	comp100370_c0_seq1,comp100370_c0_seq2,comp100370_c0_seq3,comp100370_c0_seq4,comp100370_c0_seq5	2353.28	2301.82	290.86	7.63	5.47
comp100371_c0	comp100371_c0_seq1,comp100371_c0_seq2,comp100371_c0_seq3,comp100371_c0_seq4,comp100371_c0_seq5	1776.04	1724.58	58	2.03	1.46
comp100372_c1	comp100372_c1_seq2,comp100372_c1_seq3,comp100372_c1_seq4	932.79	881.35	138	9.5	6.81
comp100373_c0	comp100373_c0_seq1	738	686.55	48	4.25	3.04
comp100373_c1	comp100373_c1_seq1,comp100373_c1_seq2,comp100373_c1_seq3,comp100373_c1_seq4,comp100373_c1_seq5	873.25	821.79	89	6.57	4.71
comp100373_c3	comp100373_c3_seq1,comp100373_c3_seq2,comp100373_c3_seq3,comp100373_c3_seq4	850.31	798.86	99	7.52	5.39
comp100374_c2	comp100374_c2_seq1,comp100374_c2_seq2,comp100374_c2_seq3,comp100374_c2_seq4,comp100374_c2_seq5	1207	1155.54	99	5.19	3.72
comp100374_c5	comp100374_c5_seq1,comp100374_c5_seq3,comp100374_c5_seq4,comp100374_c5_seq5	946.29	894.85	61	4.13	2.96
comp100374_c7	comp100374_c7_seq1,comp100374_c7_seq2,comp100374_c7_seq3	699.76	648.31	10	0.94	0.67
comp100375_c1	comp100375_c1_seq2,comp100375_c1_seq4	1444.1	1392.64	71	3.08	2.21
comp100376_c0	comp100376_c0_seq1,comp100376_c0_seq2,comp100376_c0_seq3,comp100376_c0_seq4,comp100376_c0_seq5	2113.67	2062.22	153	4.48	3.21
comp100377_c0	comp100377_c0_seq1	2300	2248.54	45	1.21	0.87
comp100378_c0	comp100378_c0_seq1,comp100378_c0_seq2,comp100378_c0_seq3,comp100378_c0_seq4,comp100378_c0_seq5	1801.36	1749.91	711.67	24.59	17.62
comp100379_c0	comp100379_c0_seq1	1762	1710.54	280.07	9.9	7.09
comp10038_c0	comp10038_c0_seq1	666	614.55	3	0.3	0.21
comp100380_c0	comp100380_c0_seq1,comp100380_c0_seq3,comp100380_c0_seq4	974.62	923.16	137.94	9.06	6.49
comp100381_c2	comp100381_c2_seq1	690	638.55	568.64	54.14	38.8
comp100381_c3	comp100381_c3_seq1,comp100381_c3_seq3,comp100381_c3_seq4	1195.59	1144.14	191.08	10.11	7.25
comp100381_c4	comp100381_c4_seq1,comp100381_c4_seq2,comp100381_c4_seq3,comp100381_c4_seq4,comp100381_c4_seq5	3239	3187.54	5	0.09	0.07
comp100382_c0	comp100382_c0_seq2	679	627.55	2	0.19	0.14
comp100382_c1	comp100382_c1_seq1	689	637.55	0	0	0
comp100382_c2	comp100382_c2_seq3,comp100382_c2_seq4	976	924.54	2	0.13	0.09
comp100383_c0	comp100383_c0_seq1	3985	3933.54	37	0.57	0.41
comp100384_c0	comp100384_c0_seq2,comp100384_c0_seq3	2173.36	2121.9	2141.87	60.99	43.71
comp100385_c0	comp100385_c0_seq1	1459	1407.54	5	0.21	0.15
comp100386_c0	comp100386_c0_seq1,comp100386_c0_seq3,comp100386_c0_seq4,comp100386_c0_seq5	750.12	698.67	9	0.78	0.56
comp100386_c1	comp100386_c1_seq1	634	582.56	8	0.84	0.6
comp100386_c2	comp100386_c2_seq1	585	533.56	4	0.46	0.33
comp100386_c3	comp100386_c3_seq1,comp100386_c3_seq2,comp100386_c3_seq3,comp100386_c3_seq4,comp100386_c3_seq5	889.64	838.18	51	3.69	2.65
comp100387_c0	comp100387_c0_seq2,comp100387_c0_seq3	1410.96	1359.5	78	3.47	2.49
comp100387_c2	comp100387_c2_seq1,comp100387_c2_seq3,comp100387_c2_seq4,comp100387_c2_seq5	673.54	622.09	68	6.65	4.76
comp100388_c0	comp100388_c0_seq2,comp100388_c0_seq5	1485.31	1433.85	98	4.14	2.96
comp100389_c1	comp100389_c1_seq1,comp100389_c1_seq3,comp100389_c1_seq4,comp100389_c1_seq5	1755.27	1703.81	712	25.27	18.11
comp100389_c2	comp100389_c2_seq1	621	569.56	12	1.28	0.92
comp10039_c0	comp10039_c0_seq1	545	493.57	3	0.37	0.27
comp100390_c0	comp100390_c0_seq1,comp100390_c0_seq2,comp100390_c0_seq3,comp100390_c0_seq4,comp100390_c0_seq5	1973.6	1922.14	71	2.23	1.6
comp100390_c1	comp100390_c1_seq1,comp100390_c1_seq2	793	741.54	7	0.57	0.41
comp100390_c2	comp100390_c2_seq1	1244	1192.54	7	0.36	0.25
comp100390_c3	comp100390_c3_seq1	1198	1146.54	12	0.63	0.45
comp100390_c4	comp100390_c4_seq1	546	494.57	12	1.48	1.06
comp100391_c0	comp100391_c0_seq1,comp100391_c0_seq2,comp100391_c0_seq3,comp100391_c0_seq4,comp100391_c0_seq5	771.46	720.01	83	7	5.02
comp100391_c1	comp100391_c1_seq1,comp100391_c1_seq2,comp100391_c1_seq3,comp100391_c1_seq4	552.37	500.94	14	1.7	1.22
comp100391_c2	comp100391_c2_seq1,comp100391_c2_seq2	683.89	632.44	31	2.98	2.14
comp100392_c0	comp100392_c0_seq1,comp100392_c0_seq2,comp100392_c0_seq3,comp100392_c0_seq4	2960.63	2909.17	835.25	17.34	12.42
comp100393_c0	comp100393_c0_seq1,comp100393_c0_seq2,comp100393_c0_seq3,comp100393_c0_seq4,comp100393_c0_seq5	1895.09	1843.63	152.72	5.01	3.59
comp100394_c0	comp100394_c0_seq1,comp100394_c0_seq2,comp100394_c0_seq3,comp100394_c0_seq4,comp100394_c0_seq5	1630.92	1579.46	341	13.06	9.36
comp100395_c1	comp100395_c1_seq1,comp100395_c1_seq2,comp100395_c1_seq3,comp100395_c1_seq4,comp100395_c1_seq5	973.94	922.48	839.82	55.2	39.56
comp100396_c0	comp100396_c0_seq1	2267	2215.54	676	18.43	13.21
comp100397_c0	comp100397_c0_seq1,comp100397_c0_seq2,comp100397_c0_seq3,comp100397_c0_seq4,comp100397_c0_seq5	762.75	711.29	27	2.31	1.65
comp100398_c0	comp100398_c0_seq1	2983	2931.54	17786.2	366.32	262.52
comp100399_c0	comp100399_c0_seq1,comp100399_c0_seq2,comp100399_c0_seq3,comp100399_c0_seq4,comp100399_c0_seq5	1851.55	1800.09	713	23.95	17.16
comp100400_c0	comp100400_c0_seq1	594	542.56	15	1.68	1.21
comp100400_c1	comp100400_c1_seq1,comp100400_c1_seq2,comp100400_c1_seq3,comp100400_c1_seq4	1302.64	1251.18	18	0.87	0.62
comp100401_c0	comp100401_c0_seq1,comp100401_c0_seq2,comp100401_c0_seq3,comp100401_c0_seq4,comp100401_c0_seq5	2186.04	2134.58	136	3.85	2.76
comp100402_c0	comp100402_c0_seq1,comp100402_c0_seq2	3165.47	3114.02	118	2.29	1.64
comp100403_c0	comp100403_c0_seq1,comp100403_c0_seq3,comp100403_c0_seq4,comp100403_c0_seq5	999.91	948.46	43	2.75	1.97
comp100404_c0	comp100404_c0_seq3,comp100404_c0_seq4,comp100404_c0_seq5	1394.96	1343.5	7394.53	333.1	238.71
comp100404_c1	comp100404_c1_seq2,comp100404_c1_seq3,comp100404_c1_seq4	2388.32	2336.86	78	2.02	1.44
comp100405_c2	comp100405_c2_seq1,comp100405_c2_seq3,comp100405_c2_seq4,comp100405_c2_seq5	1987	1935.54	2	0.06	0.04
comp100406_c0	comp100406_c0_seq1,comp100406_c0_seq2,comp100406_c0_seq3,comp100406_c0_seq4,comp100406_c0_seq5	1962.31	1910.85	1520.99	48.11	34.48
comp100407_c0	comp100407_c0_seq1,comp100407_c0_seq2	2027	1975.54	115	3.52	2.52
comp100408_c0	comp100408_c0_seq1,comp100408_c0_seq2,comp100408_c0_seq3,comp100408_c0_seq4,comp100408_c0_seq5	4173.98	4122.52	265.39	3.88	2.78
comp100408_c1	comp100408_c1_seq1,comp100408_c1_seq2,comp100408_c1_seq3	1371.08	1319.63	395	18.12	12.98
comp100408_c2	comp100408_c2_seq1,comp100408_c2_seq2	939	887.54	4	0.27	0.2
comp100409_c1	comp100409_c1_seq1,comp100409_c1_seq2,comp100409_c1_seq3,comp100409_c1_seq4,comp100409_c1_seq5	1609.92	1558.46	954.77	37.05	26.55
comp100410_c0	comp100410_c0_seq1,comp100410_c0_seq2	2015	1963.54	25	0.77	0.55
comp100411_c0	comp100411_c0_seq1,comp100411_c0_seq3,comp100411_c0_seq4,comp100411_c0_seq5	3877.7	3826.24	946.59	14.93	10.7
comp100412_c0	comp100412_c0_seq1	3147	3095.54	287.89	5.61	4.02
comp100413_c0	comp100413_c0_seq1,comp100413_c0_seq2,comp100413_c0_seq3,comp100413_c0_seq4,comp100413_c0_seq5	1898.09	1846.63	249	8.15	5.84
comp100414_c0	comp100414_c0_seq1,comp100414_c0_seq2,comp100414_c0_seq3,comp100414_c0_seq4	1361.91	1310.46	410.07	18.94	13.57
comp100414_c1	comp100414_c1_seq1	961	909.54	7	0.47	0.33
comp100414_c2	comp100414_c2_seq1	1019	967.54	10	0.63	0.45
comp100415_c0	comp100415_c0_seq2	853	801.54	131	9.92	7.11
comp100415_c1	comp100415_c1_seq1,comp100415_c1_seq2,comp100415_c1_seq3,comp100415_c1_seq4,comp100415_c1_seq5	2841.99	2790.53	89	1.93	1.38
comp100415_c2	comp100415_c2_seq1	672	620.55	14	1.37	0.98
comp100415_c3	comp100415_c3_seq1	1327	1275.54	28	1.33	0.95
comp100416_c0	comp100416_c0_seq1,comp100416_c0_seq2,comp100416_c0_seq3,comp100416_c0_seq4,comp100416_c0_seq5	1162.94	1111.48	157.05	8.56	6.13
comp100416_c1	comp100416_c1_seq1,comp100416_c1_seq2	1181	1129.54	12	0.64	0.46
comp100416_c4	comp100416_c4_seq1	597	545.56	0	0	0
comp100416_c5	comp100416_c5_seq1,comp100416_c5_seq2,comp100416_c5_seq3,comp100416_c5_seq4,comp100416_c5_seq5	586.72	535.29	44	5.01	3.59
comp100417_c2	comp100417_c2_seq1,comp100417_c2_seq2,comp100417_c2_seq3,comp100417_c2_seq4	1378.67	1327.21	65	2.96	2.12
comp100418_c0	comp100418_c0_seq1,comp100418_c0_seq2,comp100418_c0_seq3,comp100418_c0_seq4,comp100418_c0_seq5	3363.37	3311.91	1793	32.68	23.42
comp100419_c0	comp100419_c0_seq1,comp100419_c0_seq2,comp100419_c0_seq3	1929.09	1877.63	273	8.79	6.3
comp100420_c0	comp100420_c0_seq1,comp100420_c0_seq2,comp100420_c0_seq3	2852.96	2801.5	650.84	14.03	10.05
comp100421_c0	comp100421_c0_seq1	2120	2068.54	20	0.58	0.42
comp100422_c0	comp100422_c0_seq1,comp100422_c0_seq2,comp100422_c0_seq3,comp100422_c0_seq4,comp100422_c0_seq5	1092.35	1040.89	264	15.37	11.01
comp100423_c0	comp100423_c0_seq1,comp100423_c0_seq2,comp100423_c0_seq3,comp100423_c0_seq4	1152.96	1101.51	113.06	6.22	4.46
comp100424_c0	comp100424_c0_seq1,comp100424_c0_seq2	1900.21	1848.75	133	4.35	3.12
comp100425_c0	comp100425_c0_seq1	2785	2733.54	152	3.36	2.41
comp100426_c0	comp100426_c0_seq1	2381	2329.54	14003.7	363.14	260.24
comp100427_c0	comp100427_c0_seq1,comp100427_c0_seq2,comp100427_c0_seq3	1052.87	1001.42	67	4.05	2.91
comp100427_c4	comp100427_c4_seq1,comp100427_c4_seq2,comp100427_c4_seq3,comp100427_c4_seq4,comp100427_c4_seq5	888.25	836.8	142	10.3	7.38
comp100428_c0	comp100428_c0_seq1,comp100428_c0_seq2,comp100428_c0_seq3,comp100428_c0_seq4,comp100428_c0_seq5	1295.51	1244.05	271	13.19	9.45
comp100429_c0	comp100429_c0_seq1,comp100429_c0_seq2,comp100429_c0_seq3,comp100429_c0_seq4,comp100429_c0_seq5	1036.3	984.84	242	14.89	10.67
comp100430_c0	comp100430_c0_seq1,comp100430_c0_seq3,comp100430_c0_seq4	867.79	816.33	97	7.21	5.17
comp100431_c0	comp100431_c0_seq1,comp100431_c0_seq2,comp100431_c0_seq3,comp100431_c0_seq4,comp100431_c0_seq5	1574.26	1522.8	385	15.29	10.96
comp100432_c0	comp100432_c0_seq1	1942	1890.54	58.1	1.86	1.33
comp100433_c0	comp100433_c0_seq1,comp100433_c0_seq2,comp100433_c0_seq3,comp100433_c0_seq4,comp100433_c0_seq5	1406.01	1354.55	683	30.51	21.87
comp100434_c4	comp100434_c4_seq1	610	558.56	6	0.65	0.47
comp100434_c5	comp100434_c5_seq1,comp100434_c5_seq3,comp100434_c5_seq4,comp100434_c5_seq5	1151.79	1100.34	87	4.79	3.43
comp100434_c6	comp100434_c6_seq1,comp100434_c6_seq2,comp100434_c6_seq3,comp100434_c6_seq4	1272.63	1221.18	113.96	5.65	4.05
comp100434_c8	comp100434_c8_seq1,comp100434_c8_seq2	1226.29	1174.84	27	1.39	1
comp100434_c9	comp100434_c9_seq1	757	705.55	39	3.36	2.41
comp100435_c0	comp100435_c0_seq1,comp100435_c0_seq2,comp100435_c0_seq3,comp100435_c0_seq4,comp100435_c0_seq5	2854.08	2802.62	857.12	18.47	13.23
comp100436_c0	comp100436_c0_seq1,comp100436_c0_seq2,comp100436_c0_seq3,comp100436_c0_seq4,comp100436_c0_seq5	892.44	840.99	71	5.12	3.67
comp100436_c1	comp100436_c1_seq1	590	538.56	11	1.24	0.89
comp100436_c2	comp100436_c2_seq1,comp100436_c2_seq2,comp100436_c2_seq3,comp100436_c2_seq4,comp100436_c2_seq5	1139.64	1088.19	23	1.28	0.92
comp100437_c0	comp100437_c0_seq1,comp100437_c0_seq2,comp100437_c0_seq3,comp100437_c0_seq4	1207.41	1155.95	25	1.31	0.94
comp100437_c1	comp100437_c1_seq1	608	556.56	9	0.98	0.71
comp100438_c0	comp100438_c0_seq1	723	671.55	5	0.45	0.32
comp100438_c1	comp100438_c1_seq1,comp100438_c1_seq2,comp100438_c1_seq3,comp100438_c1_seq4,comp100438_c1_seq5	1932.68	1881.22	1161.3	37.31	26.74
comp100438_c2	comp100438_c2_seq1	544	492.57	0	0	0
comp100439_c1	comp100439_c1_seq1,comp100439_c1_seq2,comp100439_c1_seq3,comp100439_c1_seq4,comp100439_c1_seq5	1648.18	1596.73	1023.76	38.78	27.79
comp100440_c0	comp100440_c0_seq1,comp100440_c0_seq2,comp100440_c0_seq3,comp100440_c0_seq4	3106.95	3055.5	7945.59	157	112.51
comp100441_c0	comp100441_c0_seq1,comp100441_c0_seq2,comp100441_c0_seq3,comp100441_c0_seq4,comp100441_c0_seq5	2707.64	2656.18	987	22.44	16.08
comp100442_c0	comp100442_c0_seq1,comp100442_c0_seq2,comp100442_c0_seq3,comp100442_c0_seq4,comp100442_c0_seq5	2488.59	2437.13	340	8.43	6.04
comp100443_c1	comp100443_c1_seq1,comp100443_c1_seq2,comp100443_c1_seq3,comp100443_c1_seq4,comp100443_c1_seq5	1663.99	1612.53	542.99	20.36	14.59
comp100444_c0	comp100444_c0_seq1,comp100444_c0_seq2,comp100444_c0_seq3,comp100444_c0_seq4,comp100444_c0_seq5	1142.3	1090.85	430.93	23.93	17.15
comp100445_c0	comp100445_c0_seq1	1391	1339.54	10	0.45	0.32
comp100446_c0	comp100446_c0_seq1,comp100446_c0_seq2	1156.62	1105.17	86.96	4.77	3.42
comp100447_c0	comp100447_c0_seq1,comp100447_c0_seq2	954	902.55	37	2.49	1.78
comp100447_c1	comp100447_c1_seq1,comp100447_c1_seq2,comp100447_c1_seq3,comp100447_c1_seq4,comp100447_c1_seq5	1781.27	1729.81	124	4.33	3.11
comp100447_c3	comp100447_c3_seq1	691	639.55	21	2	1.43
comp100448_c0	comp100448_c0_seq1,comp100448_c0_seq2	590.17	538.73	4.97	0.56	0.4
comp100449_c0	comp100449_c0_seq1,comp100449_c0_seq2,comp100449_c0_seq3,comp100449_c0_seq4,comp100449_c0_seq5	2216.14	2164.69	16	0.45	0.32
comp1004493_c0	comp1004493_c0_seq1	510	458.58	3	0.4	0.29
comp10045_c0	comp10045_c0_seq1	529	477.58	3	0.38	0.27
comp100450_c0	comp100450_c0_seq1,comp100450_c0_seq2,comp100450_c0_seq3,comp100450_c0_seq4,comp100450_c0_seq5	1337.32	1285.86	370	17.42	12.48
comp100451_c0	comp100451_c0_seq1,comp100451_c0_seq3,comp100451_c0_seq5	2772.33	2720.87	1165.08	25.86	18.53
comp100452_c0	comp100452_c0_seq1,comp100452_c0_seq2,comp100452_c0_seq3,comp100452_c0_seq4,comp100452_c0_seq5	2525.27	2473.81	715.39	17.47	12.52
comp1004524_c0	comp1004524_c0_seq1	597	545.56	7	0.78	0.56
comp100453_c0	comp100453_c0_seq1	972	920.54	23	1.52	1.09
comp100453_c1	comp100453_c1_seq1,comp100453_c1_seq2,comp100453_c1_seq3,comp100453_c1_seq4,comp100453_c1_seq5	2418.06	2366.6	1486.45	37.94	27.19
comp100454_c0	comp100454_c0_seq1,comp100454_c0_seq2,comp100454_c0_seq3,comp100454_c0_seq4,comp100454_c0_seq5	2676.72	2625.26	104.11	2.39	1.72
comp100454_c1	comp100454_c1_seq2,comp100454_c1_seq3,comp100454_c1_seq4,comp100454_c1_seq5	709.07	657.63	599	55.36	39.67
comp100454_c2	comp100454_c2_seq1	1148	1096.54	14	0.77	0.55
comp100455_c0	comp100455_c0_seq1,comp100455_c0_seq3,comp100455_c0_seq4,comp100455_c0_seq5	1684.49	1633.04	1547.84	57.32	41.08
comp100456_c0	comp100456_c0_seq1,comp100456_c0_seq2	1070.73	1019.28	138.99	8.26	5.92
comp100457_c0	comp100457_c0_seq1	1360	1308.54	53	2.45	1.76
comp100457_c1	comp100457_c1_seq1,comp100457_c1_seq2,comp100457_c1_seq3,comp100457_c1_seq4,comp100457_c1_seq5	1225.66	1174.2	295.94	15.26	10.94
comp100457_c3	comp100457_c3_seq1,comp100457_c3_seq2,comp100457_c3_seq4	1585.5	1534.05	5813.67	229.24	164.28
comp100458_c0	comp100458_c0_seq1,comp100458_c0_seq2	1119.67	1068.21	31	1.76	1.26
comp100459_c0	comp100459_c0_seq1,comp100459_c0_seq2,comp100459_c0_seq3,comp100459_c0_seq4,comp100459_c0_seq5	1525.79	1474.34	58	2.38	1.71
comp100460_c0	comp100460_c0_seq1	1124	1072.54	28.05	1.58	1.14
comp100462_c0	comp100462_c0_seq1	3486	3434.54	1107	19.45	13.94
comp100463_c0	comp100463_c0_seq1,comp100463_c0_seq2,comp100463_c0_seq3,comp100463_c0_seq4,comp100463_c0_seq5	1828.65	1777.2	268	9.12	6.53
comp100464_c0	comp100464_c0_seq1,comp100464_c0_seq3,comp100464_c0_seq5	1477.74	1426.28	239	10.14	7.27
comp100464_c3	comp100464_c3_seq1	1814	1762.54	223	7.65	5.48
comp100465_c0	comp100465_c0_seq1,comp100465_c0_seq2,comp100465_c0_seq3,comp100465_c0_seq4,comp100465_c0_seq5	3184.22	3132.76	840.96	16.21	11.61
comp100466_c0	comp100466_c0_seq1,comp100466_c0_seq2,comp100466_c0_seq3	565.48	514.05	507.01	60.09	43.06
comp100466_c1	comp100466_c1_seq1,comp100466_c1_seq2,comp100466_c1_seq3,comp100466_c1_seq4,comp100466_c1_seq5	2333	2281.54	1642.52	43.49	31.17
comp100467_c0	comp100467_c0_seq1	1297	1245.54	29	1.41	1.01
comp100468_c0	comp100468_c0_seq1,comp100468_c0_seq2	3341.18	3289.72	1718.95	31.54	22.6
comp100469_c0	comp100469_c0_seq1,comp100469_c0_seq2,comp100469_c0_seq3,comp100469_c0_seq4,comp100469_c0_seq5	1722.64	1671.2	173	6.26	4.49
comp10047_c0	comp10047_c0_seq1	1014	962.54	8	0.5	0.36
comp100470_c0	comp100470_c0_seq1,comp100470_c0_seq2,comp100470_c0_seq3	700.11	648.66	18	1.69	1.21
comp100471_c1	comp100471_c1_seq1,comp100471_c1_seq2,comp100471_c1_seq3,comp100471_c1_seq4,comp100471_c1_seq5	1963.22	1911.77	85.04	2.69	1.93
comp100471_c3	comp100471_c3_seq1,comp100471_c3_seq2,comp100471_c3_seq3,comp100471_c3_seq4,comp100471_c3_seq5	929.19	877.74	67	4.63	3.32
comp100472_c0	comp100472_c0_seq1	755	703.55	27	2.33	1.67
comp100473_c0	comp100473_c0_seq1,comp100473_c0_seq2,comp100473_c0_seq3,comp100473_c0_seq4	2869.86	2818.41	743	15.92	11.41
comp100473_c1	comp100473_c1_seq1	953	901.54	4	0.27	0.19
comp1004736_c0	comp1004736_c0_seq1	510	458.58	4	0.53	0.38
comp100474_c0	comp100474_c0_seq1	751	699.55	187	16.24	11.64
comp100474_c1	comp100474_c1_seq1	653	601.55	9	0.91	0.65
comp100474_c2	comp100474_c2_seq1,comp100474_c2_seq2,comp100474_c2_seq3,comp100474_c2_seq4,comp100474_c2_seq5	1509.65	1458.19	1796.25	74.52	53.41
comp100475_c0	comp100475_c0_seq1,comp100475_c0_seq2,comp100475_c0_seq3,comp100475_c0_seq4,comp100475_c0_seq5	1592.8	1541.34	84	3.3	2.36
comp100476_c0	comp100476_c0_seq1,comp100476_c0_seq2	1121.33	1069.88	125	7.08	5.07
comp100477_c0	comp100477_c0_seq1,comp100477_c0_seq2,comp100477_c0_seq3,comp100477_c0_seq4,comp100477_c0_seq5	944.84	893.38	100	6.79	4.86
comp100477_c1	comp100477_c1_seq1	697	645.55	86	8.1	5.8
comp100478_c1	comp100478_c1_seq1,comp100478_c1_seq2,comp100478_c1_seq3,comp100478_c1_seq4,comp100478_c1_seq5	1658.5	1607.04	384.9	14.48	10.38
comp100479_c0	comp100479_c0_seq1,comp100479_c0_seq2,comp100479_c0_seq3,comp100479_c0_seq4,comp100479_c0_seq5	1742.55	1691.09	1124.6	40.21	28.82
comp100480_c0	comp100480_c0_seq1,comp100480_c0_seq5	633.04	581.6	56	5.86	4.2
comp100481_c0	comp100481_c0_seq1,comp100481_c0_seq2	3369.98	3318.52	1368.91	24.9	17.84
comp100482_c0	comp100482_c0_seq1,comp100482_c0_seq2,comp100482_c0_seq3,comp100482_c0_seq4,comp100482_c0_seq5	981.85	930.39	39	2.54	1.82
comp100483_c0	comp100483_c0_seq1,comp100483_c0_seq2,comp100483_c0_seq3	2140.54	2089.09	48	1.39	0.99
comp100484_c0	comp100484_c0_seq1	617	565.56	0	0	0
comp100484_c1	comp100484_c1_seq2,comp100484_c1_seq3,comp100484_c1_seq4,comp100484_c1_seq5	1698.57	1647.12	62	2.28	1.63
comp100484_c2	comp100484_c2_seq1	805	753.54	5	0.4	0.29
comp100484_c3	comp100484_c3_seq1,comp100484_c3_seq2,comp100484_c3_seq3,comp100484_c3_seq4	1050.46	999.01	20	1.21	0.87
comp100484_c4	comp100484_c4_seq1	604	552.56	3	0.33	0.24
comp100484_c5	comp100484_c5_seq1,comp100484_c5_seq2,comp100484_c5_seq3,comp100484_c5_seq4,comp100484_c5_seq5	1560.07	1508.61	58	2.33	1.67
comp100485_c0	comp100485_c0_seq1,comp100485_c0_seq2,comp100485_c0_seq3,comp100485_c0_seq4,comp100485_c0_seq5	2842.3	2790.84	362	7.83	5.61
comp100486_c0	comp100486_c0_seq1,comp100486_c0_seq2,comp100486_c0_seq3,comp100486_c0_seq4,comp100486_c0_seq5	1659.52	1608.06	141	5.3	3.8
comp100487_c0	comp100487_c0_seq1,comp100487_c0_seq2,comp100487_c0_seq3,comp100487_c0_seq4,comp100487_c0_seq5	954	902.54	1	0.07	0.05
comp100488_c0	comp100488_c0_seq1,comp100488_c0_seq2,comp100488_c0_seq3,comp100488_c0_seq4,comp100488_c0_seq5	1729.03	1677.57	187	6.74	4.83
comp100489_c0	comp100489_c0_seq1	825	773.54	0	0	0
comp100489_c3	comp100489_c3_seq1,comp100489_c3_seq2,comp100489_c3_seq3	1011.77	960.32	43	2.71	1.95
comp100489_c4	comp100489_c4_seq1,comp100489_c4_seq3,comp100489_c4_seq4,comp100489_c4_seq5	1218.14	1166.68	332.04	17.24	12.35
comp100489_c5	comp100489_c5_seq1	2631	2579.54	11	0.26	0.18
comp100490_c0	comp100490_c0_seq1,comp100490_c0_seq2,comp100490_c0_seq3,comp100490_c0_seq4,comp100490_c0_seq5	1432.02	1380.57	162.99	7.14	5.12
comp100491_c0	comp100491_c0_seq1	654	602.55	13	1.31	0.94
comp100491_c1	comp100491_c1_seq1,comp100491_c1_seq2,comp100491_c1_seq4,comp100491_c1_seq5	906.93	855.47	113	8.01	5.74
comp100491_c3	comp100491_c3_seq2,comp100491_c3_seq4,comp100491_c3_seq5	746.68	695.23	70	6.12	4.38
comp100492_c0	comp100492_c0_seq1	1031	979.54	20	1.24	0.89
comp100492_c1	comp100492_c1_seq1,comp100492_c1_seq2	876.32	824.87	20.15	1.48	1.06
comp100492_c2	comp100492_c2_seq1,comp100492_c2_seq2,comp100492_c2_seq3,comp100492_c2_seq4,comp100492_c2_seq5	1823.65	1772.2	266.17	9.08	6.51
comp100492_c3	comp100492_c3_seq1	1138	1086.54	19	1.06	0.76
comp100492_c4	comp100492_c4_seq2	679	627.55	4	0.39	0.28
comp100492_c5	comp100492_c5_seq1	906	854.54	73	5.18	3.71
comp100492_c6	comp100492_c6_seq1	1720	1668.54	24	0.87	0.62
comp100493_c0	comp100493_c0_seq1,comp100493_c0_seq2,comp100493_c0_seq3,comp100493_c0_seq4,comp100493_c0_seq5	2100.02	2048.56	270.99	7.99	5.73
comp100494_c0	comp100494_c0_seq2,comp100494_c0_seq3	939.89	888.43	65	4.44	3.18
comp100494_c1	comp100494_c1_seq2	1351	1299.54	79	3.68	2.64
comp100495_c0	comp100495_c0_seq1,comp100495_c0_seq2,comp100495_c0_seq3,comp100495_c0_seq4,comp100495_c0_seq5	1732.22	1680.76	128	4.6	3.3
comp100495_c1	comp100495_c1_seq1	1099	1047.54	63	3.64	2.61
comp100496_c1	comp100496_c1_seq1,comp100496_c1_seq2,comp100496_c1_seq3,comp100496_c1_seq4,comp100496_c1_seq5	2460.42	2408.96	295	7.4	5.3
comp100497_c0	comp100497_c0_seq1,comp100497_c0_seq2	1192.25	1140.79	190	10.09	7.23
comp100498_c1	comp100498_c1_seq1,comp100498_c1_seq2,comp100498_c1_seq3,comp100498_c1_seq4,comp100498_c1_seq5	717.41	665.96	15.66	1.43	1.02
comp100499_c0	comp100499_c0_seq1,comp100499_c0_seq3	735.19	683.74	31	2.75	1.97
comp1005_c0	comp1005_c0_seq1	570	518.57	8	0.94	0.67
comp10050_c0	comp10050_c0_seq1	683	631.55	1	0.1	0.07
comp100500_c1	comp100500_c1_seq1	569	517.57	4	0.47	0.34
comp100501_c1	comp100501_c1_seq1,comp100501_c1_seq2	780.98	729.53	32	2.66	1.91
comp100502_c2	comp100502_c2_seq1	1024	972.54	0	0	0
comp100502_c3	comp100502_c3_seq1	615	563.56	31	3.35	2.4
comp100502_c4	comp100502_c4_seq1,comp100502_c4_seq2,comp100502_c4_seq3,comp100502_c4_seq4,comp100502_c4_seq5	1727.52	1676.06	192.15	6.93	4.97
comp100502_c5	comp100502_c5_seq1,comp100502_c5_seq2,comp100502_c5_seq3,comp100502_c5_seq4	941.86	890.41	39	2.66	1.9
comp100503_c0	comp100503_c0_seq1,comp100503_c0_seq2	581.05	529.61	5	0.57	0.41
comp100503_c1	comp100503_c1_seq1,comp100503_c1_seq2,comp100503_c1_seq3,comp100503_c1_seq4,comp100503_c1_seq5	3706.79	3655.33	134	2.21	1.59
comp100503_c4	comp100503_c4_seq1,comp100503_c4_seq2,comp100503_c4_seq3,comp100503_c4_seq4	1555.79	1504.33	350	14.07	10.09
comp100503_c5	comp100503_c5_seq1,comp100503_c5_seq2,comp100503_c5_seq3,comp100503_c5_seq4	1801.21	1749.75	85	2.94	2.1
comp100503_c6	comp100503_c6_seq1	1493	1441.54	7	0.29	0.21
comp100503_c7	comp100503_c7_seq1	795	743.54	11	0.9	0.64
comp100503_c8	comp100503_c8_seq1	736	684.55	14	1.24	0.89
comp100504_c1	comp100504_c1_seq1,comp100504_c1_seq2,comp100504_c1_seq3,comp100504_c1_seq4,comp100504_c1_seq5	1175.87	1124.42	173.7	9.36	6.71
comp1005047_c0	comp1005047_c0_seq1	640	588.56	1	0.1	0.07
comp100505_c0	comp100505_c0_seq1,comp100505_c0_seq2,comp100505_c0_seq3,comp100505_c0_seq4,comp100505_c0_seq5	2255.37	2203.92	1438.77	39.44	28.27
comp100506_c0	comp100506_c0_seq1,comp100506_c0_seq3,comp100506_c0_seq4,comp100506_c0_seq5	1697.57	1646.12	129	4.74	3.4
comp100507_c0	comp100507_c0_seq1	2037	1985.54	518.86	15.79	11.32
comp100508_c0	comp100508_c0_seq1	1612	1560.54	251.83	9.76	6.99
comp100509_c0	comp100509_c0_seq1,comp100509_c0_seq2	1254.69	1203.23	72.23	3.63	2.6
comp100509_c1	comp100509_c1_seq1,comp100509_c1_seq2,comp100509_c1_seq3,comp100509_c1_seq4,comp100509_c1_seq5	835.48	784.04	50	3.87	2.77
comp100510_c0	comp100510_c0_seq1,comp100510_c0_seq2,comp100510_c0_seq3,comp100510_c0_seq4	2639.88	2588.42	422	9.85	7.06
comp100511_c0	comp100511_c0_seq1,comp100511_c0_seq2,comp100511_c0_seq3,comp100511_c0_seq4,comp100511_c0_seq5	1601.42	1549.96	207	8.08	5.79
comp100512_c2	comp100512_c2_seq2,comp100512_c2_seq3,comp100512_c2_seq4,comp100512_c2_seq5	1579.03	1527.58	88.19	3.49	2.5
comp1005128_c0	comp1005128_c0_seq1	512	460.58	0	0	0
comp100513_c0	comp100513_c0_seq1,comp100513_c0_seq2	556.5	505.07	0	0	0
comp100513_c1	comp100513_c1_seq1,comp100513_c1_seq3,comp100513_c1_seq5	1435.89	1384.44	179	7.82	5.61
comp100513_c2	comp100513_c2_seq1,comp100513_c2_seq2,comp100513_c2_seq4,comp100513_c2_seq5	1070.82	1019.37	162.05	9.63	6.9
comp100514_c0	comp100514_c0_seq1	2185	2133.54	330.76	9.37	6.71
comp100515_c0	comp100515_c0_seq1,comp100515_c0_seq2,comp100515_c0_seq3,comp100515_c0_seq4	955.39	903.93	67	4.5	3.22
comp100516_c0	comp100516_c0_seq1,comp100516_c0_seq2,comp100516_c0_seq3,comp100516_c0_seq4,comp100516_c0_seq5	4194.48	4143.02	407.16	5.93	4.25
comp100516_c1	comp100516_c1_seq1	1175	1123.54	33	1.78	1.27
comp100517_c0	comp100517_c0_seq1,comp100517_c0_seq2,comp100517_c0_seq3,comp100517_c0_seq4,comp100517_c0_seq5	1088.64	1037.19	288	16.82	12.06
comp100517_c1	comp100517_c1_seq1,comp100517_c1_seq2	662.85	611.4	6	0.6	0.43
comp100518_c0	comp100518_c0_seq1	1320	1268.54	22	1.05	0.75
comp100518_c2	comp100518_c2_seq1,comp100518_c2_seq2,comp100518_c2_seq3,comp100518_c2_seq4,comp100518_c2_seq5	1190.5	1139.04	187	9.94	7.13
comp100519_c1	comp100519_c1_seq1,comp100519_c1_seq2,comp100519_c1_seq3	1551.02	1499.56	71435.1	2881.74	2065.13
comp100520_c0	comp100520_c0_seq1	1626	1574.54	4	0.15	0.11
comp100521_c0	comp100521_c0_seq3,comp100521_c0_seq4,comp100521_c0_seq5	597.29	545.86	6	0.67	0.48
comp100522_c0	comp100522_c0_seq1,comp100522_c0_seq2,comp100522_c0_seq3,comp100522_c0_seq4,comp100522_c0_seq5	2208.16	2156.71	131	3.67	2.63
comp100523_c2	comp100523_c2_seq1,comp100523_c2_seq4,comp100523_c2_seq5	1348.03	1296.57	125	5.84	4.18
comp100523_c3	comp100523_c3_seq1,comp100523_c3_seq2,comp100523_c3_seq3	1355.43	1303.97	63	2.92	2.1
comp100523_c5	comp100523_c5_seq1,comp100523_c5_seq2,comp100523_c5_seq3,comp100523_c5_seq4,comp100523_c5_seq5	1362.01	1310.56	156	7.2	5.16
comp100524_c0	comp100524_c0_seq1,comp100524_c0_seq2,comp100524_c0_seq3,comp100524_c0_seq4,comp100524_c0_seq5	2405.25	2353.79	423.99	10.88	7.8
comp100525_c1	comp100525_c1_seq1,comp100525_c1_seq2,comp100525_c1_seq4,comp100525_c1_seq5	731.8	680.35	128	11.43	8.19
comp100526_c0	comp100526_c0_seq1,comp100526_c0_seq3	2302.9	2251.44	24	0.64	0.46
comp100527_c1	comp100527_c1_seq1,comp100527_c1_seq2,comp100527_c1_seq3,comp100527_c1_seq4,comp100527_c1_seq5	1140.67	1089.22	127	7.06	5.06
comp100528_c0	comp100528_c0_seq1,comp100528_c0_seq3,comp100528_c0_seq4,comp100528_c0_seq5	861.57	810.12	175.52	13.15	9.42
comp100528_c1	comp100528_c1_seq1	578	526.57	1	0.12	0.08
comp1005288_c0	comp1005288_c0_seq1	750	698.55	23	2	1.43
comp100529_c0	comp100529_c0_seq1	2167	2115.54	29	0.83	0.59
comp100530_c1	comp100530_c1_seq1,comp100530_c1_seq2,comp100530_c1_seq3	2513	2461.54	108	2.65	1.9
comp100531_c0	comp100531_c0_seq1,comp100531_c0_seq2,comp100531_c0_seq3	1940.83	1889.37	500.61	16.02	11.48
comp100532_c0	comp100532_c0_seq1,comp100532_c0_seq2,comp100532_c0_seq3,comp100532_c0_seq4,comp100532_c0_seq5	7970.05	7918.59	348.72	2.66	1.9
comp100533_c0	comp100533_c0_seq1,comp100533_c0_seq3,comp100533_c0_seq4	1739	1687.54	304.99	10.93	7.83
comp100534_c0	comp100534_c0_seq1	1113	1061.54	13	0.74	0.53
comp100534_c2	comp100534_c2_seq1	801	749.54	23	1.86	1.34
comp100534_c7	comp100534_c7_seq1,comp100534_c7_seq2,comp100534_c7_seq3,comp100534_c7_seq4,comp100534_c7_seq5	1116.08	1064.62	170.68	9.71	6.96
comp100535_c1	comp100535_c1_seq1,comp100535_c1_seq2,comp100535_c1_seq3,comp100535_c1_seq4,comp100535_c1_seq5	807.71	756.26	18	1.45	1.04
comp100536_c1	comp100536_c1_seq1	1621	1569.54	30	1.16	0.83
comp100537_c0	comp100537_c0_seq1,comp100537_c0_seq3	603.96	552.52	24	2.64	1.89
comp100538_c0	comp100538_c0_seq1,comp100538_c0_seq2,comp100538_c0_seq3,comp100538_c0_seq4,comp100538_c0_seq5	1460.49	1409.03	5546.12	238.17	170.68
comp100539_c0	comp100539_c0_seq2	527	475.58	6.01	0.77	0.55
comp100540_c0	comp100540_c0_seq1,comp100540_c0_seq2,comp100540_c0_seq4	1931.86	1880.4	60	1.93	1.38
comp100541_c0	comp100541_c0_seq1,comp100541_c0_seq3,comp100541_c0_seq4,comp100541_c0_seq5	1332.11	1280.65	105	4.96	3.56
comp100541_c1	comp100541_c1_seq1	535	483.57	0	0	0
comp100542_c0	comp100542_c0_seq1,comp100542_c0_seq2,comp100542_c0_seq3,comp100542_c0_seq4	2232.21	2180.76	147	4.07	2.92
comp100542_c1	comp100542_c1_seq1	1065	1013.54	15.15	0.91	0.65
comp100543_c0	comp100543_c0_seq1	650	598.55	2	0.2	0.15
comp100544_c1	comp100544_c1_seq1,comp100544_c1_seq2,comp100544_c1_seq3,comp100544_c1_seq4,comp100544_c1_seq5	1536.42	1484.96	114	4.64	3.33
comp100544_c2	comp100544_c2_seq1	920	868.54	162	11.31	8.11
comp100545_c0	comp100545_c0_seq2,comp100545_c0_seq3,comp100545_c0_seq4	610.95	559.51	27	2.94	2.1
comp100546_c2	comp100546_c2_seq1,comp100546_c2_seq2,comp100546_c2_seq3,comp100546_c2_seq4	2007.23	1955.77	34	1.05	0.75
comp100546_c3	comp100546_c3_seq1,comp100546_c3_seq3,comp100546_c3_seq4,comp100546_c3_seq5	977.94	926.48	289	18.91	13.55
comp100547_c0	comp100547_c0_seq1	2445	2393.54	62	1.56	1.12
comp100548_c0	comp100548_c0_seq1,comp100548_c0_seq2,comp100548_c0_seq3	892.24	840.78	939	67.76	48.56
comp100549_c0	comp100549_c0_seq1,comp100549_c0_seq2,comp100549_c0_seq3,comp100549_c0_seq4,comp100549_c0_seq5	1830.82	1779.37	742	25.21	18.07
comp100550_c0	comp100550_c0_seq1,comp100550_c0_seq2	1258.77	1207.31	9	0.45	0.32
comp100550_c1	comp100550_c1_seq1,comp100550_c1_seq2,comp100550_c1_seq3,comp100550_c1_seq4	1236.53	1185.08	98	5.01	3.59
comp1005508_c0	comp1005508_c0_seq1	756	704.55	0	0	0
comp100551_c0	comp100551_c0_seq1,comp100551_c0_seq2,comp100551_c0_seq3,comp100551_c0_seq4,comp100551_c0_seq5	1629.37	1577.91	1068	40.94	29.34
comp100552_c0	comp100552_c0_seq1,comp100552_c0_seq2,comp100552_c0_seq3,comp100552_c0_seq4,comp100552_c0_seq5	1428.48	1377.02	468	20.57	14.74
comp100553_c1	comp100553_c1_seq2,comp100553_c1_seq5	3072.61	3021.15	717.46	14.34	10.27
comp100553_c3	comp100553_c3_seq1,comp100553_c3_seq2,comp100553_c3_seq3,comp100553_c3_seq4	1773.52	1722.06	178.04	6.25	4.48
comp100554_c0	comp100554_c0_seq1,comp100554_c0_seq2,comp100554_c0_seq3,comp100554_c0_seq5	666.08	614.64	7	0.69	0.5
comp100555_c1	comp100555_c1_seq1	1619	1567.54	76.52	2.95	2.12
comp100557_c0	comp100557_c0_seq1,comp100557_c0_seq3,comp100557_c0_seq4,comp100557_c0_seq5	3328	3276.55	364.99	6.72	4.82
comp100557_c1	comp100557_c1_seq1	553	501.57	9	1.09	0.78
comp100558_c0	comp100558_c0_seq1,comp100558_c0_seq2,comp100558_c0_seq3,comp100558_c0_seq4,comp100558_c0_seq5	947.6	896.14	69	4.67	3.35
comp100558_c1	comp100558_c1_seq2,comp100558_c1_seq3,comp100558_c1_seq4	916.69	865.24	82.1	5.76	4.12
comp100559_c0	comp100559_c0_seq1,comp100559_c0_seq2,comp100559_c0_seq3	1341.93	1290.47	86	4.03	2.89
comp100560_c0	comp100560_c0_seq1	1407	1355.54	39	1.74	1.25
comp100561_c1	comp100561_c1_seq1	1021	969.54	50	3.13	2.24
comp100561_c3	comp100561_c3_seq1,comp100561_c3_seq2,comp100561_c3_seq3,comp100561_c3_seq4	899.07	847.62	79	5.65	4.05
comp100561_c5	comp100561_c5_seq1	673	621.55	12	1.17	0.84
comp100561_c6	comp100561_c6_seq1,comp100561_c6_seq2	802	750.54	50	4.05	2.9
comp100562_c0	comp100562_c0_seq1,comp100562_c0_seq3,comp100562_c0_seq4,comp100562_c0_seq5	1384	1332.56	155.02	7.04	5.05
comp100563_c0	comp100563_c0_seq1	2814	2762.54	3062.9	66.95	47.98
comp100564_c1	comp100564_c1_seq1,comp100564_c1_seq2,comp100564_c1_seq3,comp100564_c1_seq4,comp100564_c1_seq5	1609.52	1558.06	2198.21	85.33	61.15
comp100565_c0	comp100565_c0_seq1	2766	2714.54	6375.94	141.84	101.65
comp100566_c0	comp100566_c0_seq1,comp100566_c0_seq2,comp100566_c0_seq3,comp100566_c0_seq4,comp100566_c0_seq5	882.53	831.08	93	6.79	4.87
comp100566_c1	comp100566_c1_seq1	2673	2621.54	69.7	1.61	1.15
comp100566_c2	comp100566_c2_seq1	1718	1666.54	10	0.36	0.26
comp100567_c0	comp100567_c0_seq1	1645	1593.54	11	0.42	0.3
comp100567_c1	comp100567_c1_seq1,comp100567_c1_seq2,comp100567_c1_seq3,comp100567_c1_seq4,comp100567_c1_seq5	944.58	893.13	186.35	12.65	9.07
comp100568_c1	comp100568_c1_seq1	536	484.57	7.99	1	0.72
comp100568_c2	comp100568_c2_seq1,comp100568_c2_seq2,comp100568_c2_seq4,comp100568_c2_seq5	770.83	719.37	24	2.03	1.45
comp100569_c0	comp100569_c0_seq2,comp100569_c0_seq3,comp100569_c0_seq4	2123.87	2072.41	180.02	5.25	3.76
comp100570_c1	comp100570_c1_seq1,comp100570_c1_seq2,comp100570_c1_seq4,comp100570_c1_seq5	1254.45	1203	248.97	12.53	8.98
comp100571_c0	comp100571_c0_seq1,comp100571_c0_seq2,comp100571_c0_seq3	693.36	641.92	73	6.91	4.95
comp100571_c1	comp100571_c1_seq1,comp100571_c1_seq2,comp100571_c1_seq3,comp100571_c1_seq4,comp100571_c1_seq5	1099.85	1048.39	109	6.3	4.51
comp100571_c4	comp100571_c4_seq2	701	649.55	9	0.84	0.6
comp100571_c5	comp100571_c5_seq1,comp100571_c5_seq2	656.66	605.21	15	1.51	1.08
comp100571_c6	comp100571_c6_seq1	701	649.55	21	1.97	1.41
comp100572_c0	comp100572_c0_seq1,comp100572_c0_seq2,comp100572_c0_seq3,comp100572_c0_seq4,comp100572_c0_seq5	1422.9	1371.44	157	6.93	4.96
comp100573_c1	comp100573_c1_seq1,comp100573_c1_seq2,comp100573_c1_seq3	799.68	748.23	32	2.6	1.86
comp100574_c0	comp100574_c0_seq1	724	672.55	28	2.53	1.81
comp100575_c0	comp100575_c0_seq1,comp100575_c0_seq2,comp100575_c0_seq3,comp100575_c0_seq4,comp100575_c0_seq5	2014.24	1962.78	120.95	3.72	2.67
comp1005759_c0	comp1005759_c0_seq1	500	448.58	1	0.14	0.1
comp100576_c0	comp100576_c0_seq1,comp100576_c0_seq2	1196	1144.54	28.92	1.53	1.1
comp100576_c1	comp100576_c1_seq1,comp100576_c1_seq2	607	555.56	8	0.88	0.63
comp100576_c2	comp100576_c2_seq1,comp100576_c2_seq2,comp100576_c2_seq3,comp100576_c2_seq4,comp100576_c2_seq5	1630.92	1579.46	75	2.87	2.06
comp100577_c0	comp100577_c0_seq1,comp100577_c0_seq2,comp100577_c0_seq3,comp100577_c0_seq4	2250.24	2198.78	422.04	11.6	8.31
comp100578_c0	comp100578_c0_seq1,comp100578_c0_seq2,comp100578_c0_seq3,comp100578_c0_seq4,comp100578_c0_seq5	864.31	812.86	48	3.58	2.57
comp100579_c2	comp100579_c2_seq1,comp100579_c2_seq2,comp100579_c2_seq3,comp100579_c2_seq4,comp100579_c2_seq5	910.22	858.76	92	6.5	4.66
comp100579_c4	comp100579_c4_seq1,comp100579_c4_seq2	1050.93	999.48	38	2.3	1.65
comp100580_c0	comp100580_c0_seq1	892	840.54	10	0.72	0.52
comp100580_c1	comp100580_c1_seq1,comp100580_c1_seq2,comp100580_c1_seq3,comp100580_c1_seq4,comp100580_c1_seq5	2828.07	2776.61	28	0.61	0.44
comp100581_c0	comp100581_c0_seq1	883	831.54	143	10.43	7.48
comp100582_c1	comp100582_c1_seq1	1150	1098.54	237	13.07	9.37
comp100583_c0	comp100583_c0_seq1,comp100583_c0_seq2	1674.95	1623.49	21	0.78	0.56
comp100583_c1	comp100583_c1_seq1,comp100583_c1_seq2,comp100583_c1_seq3,comp100583_c1_seq4,comp100583_c1_seq5	1319.54	1268.09	94	4.49	3.22
comp100584_c1	comp100584_c1_seq1,comp100584_c1_seq2,comp100584_c1_seq3,comp100584_c1_seq4,comp100584_c1_seq5	1382.09	1330.64	700.91	31.88	22.85
comp100585_c0	comp100585_c0_seq1,comp100585_c0_seq2	1742.65	1691.2	34	1.22	0.87
comp100586_c1	comp100586_c1_seq1,comp100586_c1_seq3,comp100586_c1_seq4,comp100586_c1_seq5	3954.05	3902.59	704.05	10.89	7.8
comp100587_c0	comp100587_c0_seq1,comp100587_c0_seq2,comp100587_c0_seq3,comp100587_c0_seq4,comp100587_c0_seq5	1695.03	1643.57	286	10.52	7.54
comp100588_c1	comp100588_c1_seq1	534	482.57	6	0.76	0.54
comp100588_c2	comp100588_c2_seq1,comp100588_c2_seq2,comp100588_c2_seq3,comp100588_c2_seq4,comp100588_c2_seq5	1057.28	1005.84	85	5.12	3.67
comp100588_c4	comp100588_c4_seq1,comp100588_c4_seq2,comp100588_c4_seq3,comp100588_c4_seq4,comp100588_c4_seq5	1215.45	1163.99	184	9.57	6.86
comp100588_c5	comp100588_c5_seq1	914	862.54	17	1.2	0.86
comp100589_c0	comp100589_c0_seq1,comp100589_c0_seq2,comp100589_c0_seq3,comp100589_c0_seq4,comp100589_c0_seq5	1530.37	1478.91	1110.33	45.42	32.55
comp100590_c0	comp100590_c0_seq2,comp100590_c0_seq3,comp100590_c0_seq4	2784.26	2732.8	482.64	10.66	7.64
comp100590_c1	comp100590_c1_seq1	1081	1029.54	18	1.06	0.76
comp100591_c0	comp100591_c0_seq1	548	496.57	11	1.35	0.97
comp100591_c1	comp100591_c1_seq1	660	608.55	19	1.9	1.36
comp100591_c3	comp100591_c3_seq2,comp100591_c3_seq3,comp100591_c3_seq4,comp100591_c3_seq5	1579.3	1527.84	782.6	30.98	22.2
comp100591_c4	comp100591_c4_seq1	510	458.58	5	0.67	0.48
comp100592_c0	comp100592_c0_seq1,comp100592_c0_seq2,comp100592_c0_seq3,comp100592_c0_seq5	1377.9	1326.44	85	3.88	2.78
comp100592_c1	comp100592_c1_seq1	887	835.54	4	0.29	0.21
comp100592_c2	comp100592_c2_seq1,comp100592_c2_seq3,comp100592_c2_seq4	845.32	793.87	24	1.83	1.31
comp100593_c0	comp100593_c0_seq1,comp100593_c0_seq2,comp100593_c0_seq3,comp100593_c0_seq4,comp100593_c0_seq5	1365.68	1314.22	205	9.44	6.77
comp100594_c0	comp100594_c0_seq1	870	818.54	5	0.37	0.27
comp100594_c1	comp100594_c1_seq1	2124	2072.54	18	0.52	0.38
comp100594_c2	comp100594_c2_seq1	869	817.54	15.78	1.17	0.84
comp100594_c3	comp100594_c3_seq1	635	583.56	1	0.1	0.07
comp100594_c4	comp100594_c4_seq1,comp100594_c4_seq2,comp100594_c4_seq3,comp100594_c4_seq5	3211.5	3160.04	47	0.9	0.64
comp100594_c5	comp100594_c5_seq1,comp100594_c5_seq2	1597	1545.54	2	0.08	0.06
comp100594_c6	comp100594_c6_seq1	656	604.55	8	0.8	0.58
comp100594_c7	comp100594_c7_seq1,comp100594_c7_seq2,comp100594_c7_seq4,comp100594_c7_seq5	1883.91	1832.45	39	1.29	0.92
comp100595_c0	comp100595_c0_seq1,comp100595_c0_seq2,comp100595_c0_seq3,comp100595_c0_seq4,comp100595_c0_seq5	1597.93	1546.47	548.81	21.46	15.38
comp100595_c1	comp100595_c1_seq1	541	489.57	5	0.62	0.45
comp100595_c2	comp100595_c2_seq1,comp100595_c2_seq2	1911.35	1859.89	277.91	9.03	6.47
comp100595_c3	comp100595_c3_seq1	758	706.55	6	0.52	0.37
comp100596_c0	comp100596_c0_seq1,comp100596_c0_seq2,comp100596_c0_seq3,comp100596_c0_seq4,comp100596_c0_seq5	1629.21	1577.75	243	9.32	6.68
comp100597_c0	comp100597_c0_seq1,comp100597_c0_seq2,comp100597_c0_seq3,comp100597_c0_seq4,comp100597_c0_seq5	2765.5	2714.05	625.64	13.92	9.98
comp100598_c0	comp100598_c0_seq1,comp100598_c0_seq2	790.25	738.79	20	1.64	1.18
comp100599_c0	comp100599_c0_seq1,comp100599_c0_seq2	1869.73	1818.27	13	0.43	0.31
comp100600_c0	comp100600_c0_seq1,comp100600_c0_seq2,comp100600_c0_seq3,comp100600_c0_seq4	2202.53	2151.08	14382.3	403.99	289.51
comp100601_c1	comp100601_c1_seq1	2070	2018.54	2	0.06	0.04
comp100601_c2	comp100601_c2_seq1	1627	1575.54	2	0.08	0.06
comp100601_c3	comp100601_c3_seq1	781	729.54	24	2	1.43
comp100601_c4	comp100601_c4_seq2,comp100601_c4_seq3,comp100601_c4_seq4,comp100601_c4_seq5	1420.11	1368.66	33	1.46	1.05
comp100601_c6	comp100601_c6_seq1	610	558.56	2	0.22	0.16
comp100601_c7	comp100601_c7_seq1	1880	1828.54	3	0.1	0.07
comp100601_c8	comp100601_c8_seq1	544	492.57	1	0.12	0.09
comp100602_c1	comp100602_c1_seq2,comp100602_c1_seq3,comp100602_c1_seq4,comp100602_c1_seq5	1917.64	1866.18	185.73	6.02	4.31
comp100602_c3	comp100602_c3_seq1	838	786.54	5	0.39	0.28
comp100603_c0	comp100603_c0_seq1,comp100603_c0_seq2	1585	1533.54	1	0.04	0.03
comp100604_c0	comp100604_c0_seq1,comp100604_c0_seq2	1501.71	1450.25	23.02	0.96	0.69
comp100605_c0	comp100605_c0_seq1,comp100605_c0_seq2,comp100605_c0_seq3,comp100605_c0_seq4	2726.13	2674.67	15.99	0.36	0.26
comp100606_c1	comp100606_c1_seq1	1074	1022.54	13	0.77	0.55
comp100607_c0	comp100607_c0_seq1,comp100607_c0_seq2,comp100607_c0_seq3,comp100607_c0_seq4,comp100607_c0_seq5	1658.42	1606.97	2135.97	80.39	57.61
comp100608_c0	comp100608_c0_seq1,comp100608_c0_seq2,comp100608_c0_seq3,comp100608_c0_seq4	1519.85	1468.4	56	2.31	1.65
comp100609_c0	comp100609_c0_seq1,comp100609_c0_seq2,comp100609_c0_seq3,comp100609_c0_seq4,comp100609_c0_seq5	2662.47	2611.01	390.15	9.02	6.47
comp100609_c1	comp100609_c1_seq1	1683	1631.54	578.47	21.44	15.37
comp100609_c2	comp100609_c2_seq1,comp100609_c2_seq2	781	729.54	8	0.67	0.48
comp100610_c0	comp100610_c0_seq1,comp100610_c0_seq2	1538	1486.54	28.99	1.18	0.85
comp100611_c0	comp100611_c0_seq1,comp100611_c0_seq2,comp100611_c0_seq3,comp100611_c0_seq4	1967.77	1916.31	270	8.52	6.1
comp100612_c0	comp100612_c0_seq1,comp100612_c0_seq3	865.62	814.17	74	5.52	3.95
comp100612_c2	comp100612_c2_seq1,comp100612_c2_seq2	830.37	778.92	72.18	5.62	4.03
comp100613_c1	comp100613_c1_seq1,comp100613_c1_seq2,comp100613_c1_seq3,comp100613_c1_seq4,comp100613_c1_seq5	1335.1	1283.65	88	4.15	2.97
comp100614_c0	comp100614_c0_seq1,comp100614_c0_seq2,comp100614_c0_seq3,comp100614_c0_seq4,comp100614_c0_seq5	1193.89	1142.43	42	2.23	1.6
comp100614_c1	comp100614_c1_seq1	649	597.55	7.87	0.8	0.57
comp100615_c0	comp100615_c0_seq1,comp100615_c0_seq2,comp100615_c0_seq3,comp100615_c0_seq4,comp100615_c0_seq5	1597.08	1545.62	155.32	6.08	4.36
comp100616_c1	comp100616_c1_seq1,comp100616_c1_seq2,comp100616_c1_seq3,comp100616_c1_seq4,comp100616_c1_seq5	1073.08	1021.64	894.17	53.03	38.01
comp100617_c1	comp100617_c1_seq1,comp100617_c1_seq2,comp100617_c1_seq3,comp100617_c1_seq5	2354.7	2303.24	168.13	4.41	3.16
comp1006173_c0	comp1006173_c0_seq1	513	461.58	5	0.66	0.47
comp100618_c0	comp100618_c0_seq1,comp100618_c0_seq2	2399.49	2348.03	502.87	12.94	9.27
comp100619_c1	comp100619_c1_seq1	727	675.55	3	0.27	0.19
comp100619_c3	comp100619_c3_seq1,comp100619_c3_seq2,comp100619_c3_seq3,comp100619_c3_seq4,comp100619_c3_seq5	1163.14	1111.68	308.08	16.79	12.03
comp10062_c0	comp10062_c0_seq1	847	795.54	7	0.53	0.38
comp100620_c0	comp100620_c0_seq1,comp100620_c0_seq2,comp100620_c0_seq3,comp100620_c0_seq4,comp100620_c0_seq5	2320.76	2269.3	1229.61	32.73	23.46
comp100621_c0	comp100621_c0_seq1,comp100621_c0_seq2,comp100621_c0_seq3,comp100621_c0_seq4	1235.85	1184.39	199	10.17	7.29
comp100622_c0	comp100622_c0_seq1,comp100622_c0_seq2,comp100622_c0_seq3,comp100622_c0_seq4,comp100622_c0_seq5	3348.09	3296.63	1645.01	30.12	21.59
comp100623_c0	comp100623_c0_seq1,comp100623_c0_seq2,comp100623_c0_seq3,comp100623_c0_seq4,comp100623_c0_seq5	2850.43	2798.97	210	4.53	3.25
comp100624_c0	comp100624_c0_seq1,comp100624_c0_seq2,comp100624_c0_seq3,comp100624_c0_seq4,comp100624_c0_seq5	3331.72	3280.26	287	5.28	3.78
comp100624_c1	comp100624_c1_seq1,comp100624_c1_seq2,comp100624_c1_seq3,comp100624_c1_seq4,comp100624_c1_seq5	1526.76	1475.31	34	1.39	1
comp100625_c1	comp100625_c1_seq2,comp100625_c1_seq3,comp100625_c1_seq5	697.62	646.17	41	3.86	2.76
comp100626_c0	comp100626_c0_seq1,comp100626_c0_seq2,comp100626_c0_seq3,comp100626_c0_seq4,comp100626_c0_seq5	1075.07	1023.61	161	9.53	6.83
comp100627_c0	comp100627_c0_seq1	713	661.55	29	2.66	1.91
comp100627_c1	comp100627_c1_seq1,comp100627_c1_seq2	2341	2289.54	237.7	6.27	4.49
comp100628_c0	comp100628_c0_seq1,comp100628_c0_seq2,comp100628_c0_seq3,comp100628_c0_seq4	1456.44	1404.99	253.21	10.9	7.81
comp100629_c0	comp100629_c0_seq1,comp100629_c0_seq2,comp100629_c0_seq3,comp100629_c0_seq4,comp100629_c0_seq5	2426.59	2375.13	1213.01	30.85	22.11
comp100630_c0	comp100630_c0_seq1	777	725.54	3	0.25	0.18
comp100630_c1	comp100630_c1_seq1,comp100630_c1_seq2,comp100630_c1_seq3,comp100630_c1_seq4,comp100630_c1_seq5	1625.79	1574.33	84	3.23	2.31
comp100630_c2	comp100630_c2_seq1	869	817.54	8	0.59	0.43
comp100630_c3	comp100630_c3_seq1	632	580.56	36	3.77	2.7
comp100631_c1	comp100631_c1_seq1,comp100631_c1_seq3,comp100631_c1_seq4	949.61	898.15	79.98	5.4	3.87
comp100631_c2	comp100631_c2_seq1,comp100631_c2_seq2	1282.79	1231.33	77	3.79	2.71
comp100632_c1	comp100632_c1_seq1	674	622.55	30	2.93	2.1
comp100632_c2	comp100632_c2_seq1	785	733.54	10	0.83	0.59
comp100632_c5	comp100632_c5_seq1,comp100632_c5_seq3,comp100632_c5_seq4,comp100632_c5_seq5	746.13	694.69	121	10.58	7.58
comp100633_c1	comp100633_c1_seq1,comp100633_c1_seq2	715.75	664.3	17	1.56	1.11
comp100633_c2	comp100633_c2_seq1,comp100633_c2_seq2,comp100633_c2_seq3,comp100633_c2_seq4	742.72	691.27	29	2.55	1.83
comp100633_c5	comp100633_c5_seq1	565	513.57	17	2.02	1.45
comp100633_c6	comp100633_c6_seq1,comp100633_c6_seq2,comp100633_c6_seq3,comp100633_c6_seq4,comp100633_c6_seq5	1727.53	1676.07	98	3.54	2.53
comp100633_c7	comp100633_c7_seq1	538	486.57	23	2.88	2.06
comp100634_c1	comp100634_c1_seq2	679	627.55	6	0.58	0.42
comp100634_c2	comp100634_c2_seq1,comp100634_c2_seq2,comp100634_c2_seq3,comp100634_c2_seq4	558.25	506.83	30	3.61	2.58
comp100635_c1	comp100635_c1_seq4	638	586.56	38.97	4.04	2.9
comp100635_c2	comp100635_c2_seq1,comp100635_c2_seq2,comp100635_c2_seq3,comp100635_c2_seq4,comp100635_c2_seq5	4198.64	4147.18	2538.99	36.94	26.47
comp100636_c0	comp100636_c0_seq1,comp100636_c0_seq2,comp100636_c0_seq3	2351.11	2299.65	512.62	13.47	9.65
comp100637_c0	comp100637_c0_seq1	506	454.58	0	0	0
comp100637_c1	comp100637_c1_seq1,comp100637_c1_seq2,comp100637_c1_seq3,comp100637_c1_seq4,comp100637_c1_seq5	1460.61	1409.15	158.02	6.79	4.86
comp100638_c0	comp100638_c0_seq1,comp100638_c0_seq2	4182.79	4131.33	1259	18.39	13.18
comp100639_c0	comp100639_c0_seq1,comp100639_c0_seq2,comp100639_c0_seq4	664.26	612.83	59	5.85	4.2
comp100640_c1	comp100640_c1_seq1	1187	1135.54	589	31.42	22.51
comp100640_c2	comp100640_c2_seq1,comp100640_c2_seq2,comp100640_c2_seq3,comp100640_c2_seq4,comp100640_c2_seq5	686.12	634.67	351	33.62	24.1
comp100640_c4	comp100640_c4_seq1	2270	2218.54	11	0.3	0.21
comp100641_c0	comp100641_c0_seq1,comp100641_c0_seq2	853.58	802.13	19	1.44	1.03
comp100642_c0	comp100642_c0_seq1,comp100642_c0_seq2,comp100642_c0_seq3,comp100642_c0_seq4,comp100642_c0_seq5	1005.6	954.16	50.01	3.18	2.28
comp100643_c0	comp100643_c0_seq1,comp100643_c0_seq2,comp100643_c0_seq3,comp100643_c0_seq4,comp100643_c0_seq5	1760.95	1709.49	183.03	6.47	4.64
comp100644_c0	comp100644_c0_seq1,comp100644_c0_seq2,comp100644_c0_seq3,comp100644_c0_seq4,comp100644_c0_seq5	1283.95	1232.49	8304.47	407.94	292.34
comp1006445_c0	comp1006445_c0_seq1	577	525.57	0	0	0
comp100645_c0	comp100645_c0_seq1	837	785.54	2	0.15	0.11
comp100645_c1	comp100645_c1_seq1,comp100645_c1_seq2	675	623.55	2	0.2	0.14
comp100645_c3	comp100645_c3_seq1,comp100645_c3_seq3,comp100645_c3_seq4,comp100645_c3_seq5	1205.91	1154.46	107.01	5.61	4.02
comp100646_c0	comp100646_c0_seq1,comp100646_c0_seq2,comp100646_c0_seq3,comp100646_c0_seq4,comp100646_c0_seq5	592.58	541.15	43	4.84	3.47
comp100646_c1	comp100646_c1_seq1,comp100646_c1_seq2,comp100646_c1_seq3,comp100646_c1_seq4,comp100646_c1_seq5	1495.78	1444.33	756	31.67	22.69
comp100646_c2	comp100646_c2_seq1	1128	1076.54	8	0.45	0.32
comp100647_c0	comp100647_c0_seq1,comp100647_c0_seq2	3398.63	3347.17	2182.13	39.35	28.2
comp100648_c0	comp100648_c0_seq1,comp100648_c0_seq2,comp100648_c0_seq3	1357.55	1306.09	48	2.22	1.59
comp100649_c1	comp100649_c1_seq1	2667	2615.54	140	3.23	2.32
comp100650_c0	comp100650_c0_seq2,comp100650_c0_seq3	742	690.55	56	4.93	3.53
comp100651_c0	comp100651_c0_seq1	878	826.54	11	0.81	0.58
comp100651_c1	comp100651_c1_seq1	575	523.57	3	0.35	0.25
comp100651_c2	comp100651_c2_seq1,comp100651_c2_seq2,comp100651_c2_seq3,comp100651_c2_seq4,comp100651_c2_seq5	2637.88	2586.42	46.05	1.08	0.77
comp100652_c0	comp100652_c0_seq1,comp100652_c0_seq2,comp100652_c0_seq3,comp100652_c0_seq4,comp100652_c0_seq5	1136.86	1085.4	423.01	23.61	16.92
comp100653_c0	comp100653_c0_seq1	748	696.55	23	2.01	1.44
comp100653_c1	comp100653_c1_seq1,comp100653_c1_seq2,comp100653_c1_seq3	1099.41	1047.96	92	5.32	3.81
comp100654_c0	comp100654_c0_seq3	585	533.56	32	3.65	2.62
comp100654_c3	comp100654_c3_seq2,comp100654_c3_seq4	799	747.54	19	1.54	1.11
comp100655_c0	comp100655_c0_seq1,comp100655_c0_seq2,comp100655_c0_seq3,comp100655_c0_seq5	1414	1362.54	202.06	8.97	6.43
comp100656_c0	comp100656_c0_seq1,comp100656_c0_seq2,comp100656_c0_seq3,comp100656_c0_seq4,comp100656_c0_seq5	1477.87	1426.41	210.99	8.95	6.41
comp100657_c0	comp100657_c0_seq1,comp100657_c0_seq2,comp100657_c0_seq3,comp100657_c0_seq4,comp100657_c0_seq5	1702.59	1651.14	78	2.86	2.05
comp100658_c0	comp100658_c0_seq1,comp100658_c0_seq3,comp100658_c0_seq4,comp100658_c0_seq5	936.65	885.2	444.01	30.42	21.8
comp100659_c0	comp100659_c0_seq1	714	662.55	35	3.21	2.3
comp100659_c1	comp100659_c1_seq1,comp100659_c1_seq2,comp100659_c1_seq3,comp100659_c1_seq4,comp100659_c1_seq5	3033.73	2982.27	80	1.62	1.16
comp100660_c3	comp100660_c3_seq1,comp100660_c3_seq3	573	521.57	5	0.58	0.42
comp100661_c0	comp100661_c0_seq1,comp100661_c0_seq2,comp100661_c0_seq3	2122.2	2070.74	2098.28	61.23	43.88
comp100662_c1	comp100662_c1_seq1,comp100662_c1_seq2,comp100662_c1_seq3,comp100662_c1_seq4,comp100662_c1_seq5	773.88	722.42	6.99	0.59	0.42
comp100663_c0	comp100663_c0_seq1,comp100663_c0_seq2,comp100663_c0_seq3,comp100663_c0_seq4,comp100663_c0_seq5	3154.11	3102.65	3019.47	58.75	42.1
comp100663_c1	comp100663_c1_seq1	1014	962.54	14	0.88	0.63
comp100664_c0	comp100664_c0_seq1,comp100664_c0_seq2,comp100664_c0_seq3,comp100664_c0_seq4,comp100664_c0_seq5	2660.3	2608.84	486	11.25	8.06
comp100665_c0	comp100665_c0_seq1,comp100665_c0_seq2,comp100665_c0_seq3,comp100665_c0_seq4,comp100665_c0_seq5	1605.94	1554.49	270	10.51	7.53
comp100666_c0	comp100666_c0_seq1,comp100666_c0_seq2,comp100666_c0_seq3,comp100666_c0_seq4,comp100666_c0_seq5	1355.99	1304.53	118	5.47	3.92
comp100667_c0	comp100667_c0_seq1,comp100667_c0_seq2,comp100667_c0_seq3,comp100667_c0_seq4,comp100667_c0_seq5	2269.83	2218.37	561.47	15.29	10.96
comp100668_c0	comp100668_c0_seq1,comp100668_c0_seq2,comp100668_c0_seq3	897.4	845.94	63	4.52	3.24
comp100668_c1	comp100668_c1_seq1	555	503.57	16	1.94	1.39
comp100668_c2	comp100668_c2_seq1	611	559.56	23	2.5	1.79
comp100668_c3	comp100668_c3_seq1,comp100668_c3_seq2	688	636.55	46	4.39	3.15
comp100668_c4	comp100668_c4_seq1,comp100668_c4_seq2,comp100668_c4_seq3	661.69	610.25	23	2.29	1.64
comp100669_c0	comp100669_c0_seq1,comp100669_c0_seq2	716.64	665.2	19	1.74	1.24
comp100670_c0	comp100670_c0_seq1,comp100670_c0_seq2,comp100670_c0_seq3,comp100670_c0_seq4	2992	2940.54	4124.66	84.69	60.69
comp100671_c0	comp100671_c0_seq1,comp100671_c0_seq2,comp100671_c0_seq3	1456	1404.54	27	1.16	0.83
comp100672_c1	comp100672_c1_seq1,comp100672_c1_seq2,comp100672_c1_seq3,comp100672_c1_seq5	1843.15	1791.69	493.35	16.65	11.93
comp100673_c0	comp100673_c0_seq1	925	873.54	1	0.07	0.05
comp100673_c1	comp100673_c1_seq1,comp100673_c1_seq2,comp100673_c1_seq3,comp100673_c1_seq4,comp100673_c1_seq5	1931.07	1879.61	110.85	3.56	2.55
comp100674_c0	comp100674_c0_seq1,comp100674_c0_seq2,comp100674_c0_seq3,comp100674_c0_seq4,comp100674_c0_seq5	1618.15	1566.69	394	15.21	10.9
comp100675_c0	comp100675_c0_seq1,comp100675_c0_seq3,comp100675_c0_seq4,comp100675_c0_seq5	5030.55	4979.09	527	6.39	4.58
comp100676_c1	comp100676_c1_seq1	591	539.56	1	0.11	0.08
comp100676_c2	comp100676_c2_seq1,comp100676_c2_seq2,comp100676_c2_seq3,comp100676_c2_seq4,comp100676_c2_seq5	808.63	757.18	234.21	18.78	13.46
comp100677_c0	comp100677_c0_seq1,comp100677_c0_seq2	1253	1201.54	7	0.35	0.25
comp100678_c0	comp100678_c0_seq1	566	514.57	9.83	1.16	0.83
comp100678_c1	comp100678_c1_seq1,comp100678_c1_seq2,comp100678_c1_seq4,comp100678_c1_seq5	605.28	553.84	136	14.95	10.71
comp100679_c2	comp100679_c2_seq1,comp100679_c2_seq2,comp100679_c2_seq3,comp100679_c2_seq4,comp100679_c2_seq5	805.35	753.9	40.98	3.3	2.36
comp100679_c3	comp100679_c3_seq1,comp100679_c3_seq2,comp100679_c3_seq3,comp100679_c3_seq4,comp100679_c3_seq5	1315.83	1264.37	70	3.35	2.4
comp100680_c0	comp100680_c0_seq1,comp100680_c0_seq2,comp100680_c0_seq3,comp100680_c0_seq4,comp100680_c0_seq5	1489.1	1437.64	87	3.66	2.62
comp100681_c0	comp100681_c0_seq1	993	941.54	15	0.97	0.69
comp100682_c0	comp100682_c0_seq1,comp100682_c0_seq2,comp100682_c0_seq3,comp100682_c0_seq4,comp100682_c0_seq5	1657.96	1606.5	639.06	24.06	17.24
comp100683_c1	comp100683_c1_seq1,comp100683_c1_seq2,comp100683_c1_seq3,comp100683_c1_seq4,comp100683_c1_seq5	850.94	799.49	173	13.13	9.41
comp1006834_c0	comp1006834_c0_seq1	502	450.58	2	0.27	0.19
comp100684_c0	comp100684_c0_seq1,comp100684_c0_seq2,comp100684_c0_seq4,comp100684_c0_seq5	772.28	720.84	81	6.82	4.89
comp100684_c1	comp100684_c1_seq1	1996	1944.54	14	0.44	0.31
comp100684_c2	comp100684_c2_seq1,comp100684_c2_seq2,comp100684_c2_seq3,comp100684_c2_seq5	1801.85	1750.39	513.89	17.75	12.72
comp100685_c0	comp100685_c0_seq1	1245	1193.54	73.96	3.75	2.69
comp100686_c0	comp100686_c0_seq4,comp100686_c0_seq5	671.49	620.05	13	1.27	0.91
comp100687_c0	comp100687_c0_seq1,comp100687_c0_seq2,comp100687_c0_seq3	902.18	850.73	44.08	3.14	2.25
comp100687_c1	comp100687_c1_seq1	690	638.55	11	1.05	0.75
comp100688_c0	comp100688_c0_seq1,comp100688_c0_seq2	851.08	799.62	4	0.3	0.22
comp100689_c0	comp100689_c0_seq1,comp100689_c0_seq2,comp100689_c0_seq3,comp100689_c0_seq4,comp100689_c0_seq5	3622.55	3571.09	519	8.77	6.29
comp100689_c1	comp100689_c1_seq1	730	678.55	53	4.75	3.4
comp100690_c1	comp100690_c1_seq1	529	477.58	3	0.38	0.27
comp100691_c0	comp100691_c0_seq1,comp100691_c0_seq2,comp100691_c0_seq3,comp100691_c0_seq4,comp100691_c0_seq5	2040.2	1988.74	169	5.14	3.68
comp100691_c1	comp100691_c1_seq1	607	555.56	7	0.77	0.55
comp100691_c2	comp100691_c2_seq1	738	686.55	3	0.27	0.19
comp100692_c0	comp100692_c0_seq1,comp100692_c0_seq2,comp100692_c0_seq3,comp100692_c0_seq4,comp100692_c0_seq5	1844.76	1793.3	28	0.94	0.68
comp100692_c1	comp100692_c1_seq1	1339	1287.54	21.46	1.01	0.72
comp100693_c0	comp100693_c0_seq1,comp100693_c0_seq2	2206.59	2155.13	268.17	7.52	5.39
comp100694_c0	comp100694_c0_seq1,comp100694_c0_seq2	543	491.57	0	0	0
comp100694_c1	comp100694_c1_seq1,comp100694_c1_seq2,comp100694_c1_seq3,comp100694_c1_seq4,comp100694_c1_seq5	2310.02	2258.56	512	13.69	9.81
comp100695_c0	comp100695_c0_seq1	819	767.54	3	0.24	0.17
comp100695_c1	comp100695_c1_seq1,comp100695_c1_seq2,comp100695_c1_seq3	1391.51	1340.05	35	1.58	1.13
comp100695_c3	comp100695_c3_seq1,comp100695_c3_seq2,comp100695_c3_seq3,comp100695_c3_seq4	3359.06	3307.6	1278.6	23.33	16.72
comp100695_c5	comp100695_c5_seq1,comp100695_c5_seq2	2053	2001.54	13.96	0.42	0.3
comp100695_c7	comp100695_c7_seq1	895	843.54	10	0.72	0.52
comp100696_c0	comp100696_c0_seq1,comp100696_c0_seq2,comp100696_c0_seq3,comp100696_c0_seq4,comp100696_c0_seq5	1994.33	1942.87	78	2.43	1.74
comp100696_c1	comp100696_c1_seq1,comp100696_c1_seq2,comp100696_c1_seq3,comp100696_c1_seq4	1504.99	1453.54	107.42	4.47	3.2
comp100696_c2	comp100696_c2_seq1,comp100696_c2_seq2,comp100696_c2_seq3,comp100696_c2_seq4,comp100696_c2_seq5	1477.55	1426.1	224	9.5	6.81
comp100697_c1	comp100697_c1_seq2,comp100697_c1_seq3	636.95	585.51	9	0.94	0.67
comp100697_c4	comp100697_c4_seq1	789	737.54	6	0.49	0.35
comp100697_c6	comp100697_c6_seq1,comp100697_c6_seq2	1203	1151.54	16	0.84	0.6
comp100697_c7	comp100697_c7_seq1,comp100697_c7_seq2,comp100697_c7_seq4,comp100697_c7_seq5	2040.31	1988.85	101	3.07	2.2
comp100697_c8	comp100697_c8_seq1	1348	1296.54	8	0.37	0.27
comp100698_c1	comp100698_c1_seq1,comp100698_c1_seq2,comp100698_c1_seq3,comp100698_c1_seq4,comp100698_c1_seq5	2913.61	2862.16	566.02	11.94	8.56
comp100699_c0	comp100699_c0_seq1,comp100699_c0_seq2,comp100699_c0_seq3,comp100699_c0_seq4,comp100699_c0_seq5	677.16	625.72	7	0.68	0.49
comp1007_c0	comp1007_c0_seq1	565	513.57	0	0	0
comp10070_c0	comp10070_c0_seq1	517	465.58	5	0.65	0.47
comp100700_c0	comp100700_c0_seq1,comp100700_c0_seq2,comp100700_c0_seq3	527.17	475.74	12	1.54	1.1
comp100701_c1	comp100701_c1_seq1	522	470.58	21	2.72	1.95
comp100701_c2	comp100701_c2_seq2	630	578.56	32	3.37	2.41
comp100701_c5	comp100701_c5_seq1,comp100701_c5_seq4,comp100701_c5_seq5	887.45	836	54	3.92	2.81
comp100701_c6	comp100701_c6_seq1,comp100701_c6_seq2,comp100701_c6_seq3,comp100701_c6_seq4	985.43	933.98	69.99	4.54	3.26
comp100702_c2	comp100702_c2_seq1,comp100702_c2_seq2,comp100702_c2_seq3,comp100702_c2_seq4,comp100702_c2_seq5	934.31	882.87	139	9.55	6.84
comp100702_c3	comp100702_c3_seq1	651	599.55	12.38	1.26	0.9
comp100703_c0	comp100703_c0_seq1,comp100703_c0_seq2	2787	2735.54	0	0	0
comp100704_c0	comp100704_c0_seq1,comp100704_c0_seq2,comp100704_c0_seq3,comp100704_c0_seq4,comp100704_c0_seq5	2030.71	1979.26	474.06	14.47	10.37
comp100705_c0	comp100705_c0_seq1,comp100705_c0_seq2	3697.5	3646.06	734.57	12.16	8.71
comp100706_c1	comp100706_c1_seq1,comp100706_c1_seq2,comp100706_c1_seq3,comp100706_c1_seq4,comp100706_c1_seq5	1772.13	1720.67	241	8.47	6.07
comp100706_c2	comp100706_c2_seq1,comp100706_c2_seq2,comp100706_c2_seq3	709	657.56	0	0	0
comp100707_c0	comp100707_c0_seq1,comp100707_c0_seq2,comp100707_c0_seq3,comp100707_c0_seq4,comp100707_c0_seq5	1579.22	1527.76	183	7.25	5.19
comp100708_c0	comp100708_c0_seq1	1063	1011.54	0	0	0
comp100708_c1	comp100708_c1_seq1,comp100708_c1_seq2,comp100708_c1_seq3,comp100708_c1_seq4	1387.22	1335.77	63	2.85	2.05
comp100708_c2	comp100708_c2_seq1	710	658.55	0	0	0
comp100709_c0	comp100709_c0_seq1,comp100709_c0_seq2,comp100709_c0_seq3,comp100709_c0_seq4,comp100709_c0_seq5	1255.03	1203.58	255	12.83	9.19
comp100710_c0	comp100710_c0_seq1,comp100710_c0_seq2,comp100710_c0_seq4,comp100710_c0_seq5	1235.14	1183.69	95.99	4.91	3.52
comp100710_c4	comp100710_c4_seq2	615	563.56	65	7.02	5.03
comp100711_c0	comp100711_c0_seq2	2242	2190.54	500.93	13.82	9.9
comp100712_c0	comp100712_c0_seq1,comp100712_c0_seq3,comp100712_c0_seq4,comp100712_c0_seq5	2141.78	2090.33	437.33	12.64	9.06
comp100713_c0	comp100713_c0_seq1,comp100713_c0_seq3,comp100713_c0_seq4,comp100713_c0_seq5	1333.95	1282.49	102	4.81	3.45
comp100714_c0	comp100714_c0_seq1,comp100714_c0_seq2,comp100714_c0_seq3,comp100714_c0_seq4	1332.21	1280.76	24	1.13	0.81
comp100715_c0	comp100715_c0_seq1,comp100715_c0_seq2,comp100715_c0_seq3,comp100715_c0_seq4	2241.97	2190.51	691	19.06	13.66
comp100716_c0	comp100716_c0_seq1,comp100716_c0_seq3,comp100716_c0_seq4,comp100716_c0_seq5	1499.6	1448.14	295.34	12.34	8.84
comp100717_c3	comp100717_c3_seq1,comp100717_c3_seq2	616.7	565.26	35	3.77	2.7
comp100717_c4	comp100717_c4_seq1,comp100717_c4_seq2,comp100717_c4_seq3,comp100717_c4_seq4,comp100717_c4_seq5	871.46	820.01	36	2.66	1.91
comp100718_c0	comp100718_c0_seq1,comp100718_c0_seq4,comp100718_c0_seq5	1384.07	1332.61	31	1.41	1.01
comp100718_c1	comp100718_c1_seq1,comp100718_c1_seq2,comp100718_c1_seq3,comp100718_c1_seq4,comp100718_c1_seq5	1141.13	1089.69	34	1.89	1.35
comp100718_c2	comp100718_c2_seq1,comp100718_c2_seq2,comp100718_c2_seq3,comp100718_c2_seq4,comp100718_c2_seq5	1017.05	965.6	22	1.38	0.99
comp100719_c0	comp100719_c0_seq1,comp100719_c0_seq2	2207	2155.54	910.51	25.52	18.29
comp100720_c0	comp100720_c0_seq1,comp100720_c0_seq2,comp100720_c0_seq3,comp100720_c0_seq4,comp100720_c0_seq5	1154.4	1102.94	0	0	0
comp100721_c0	comp100721_c0_seq1,comp100721_c0_seq2	4354.62	4303.16	2589.96	36.32	26.03
comp100722_c0	comp100722_c0_seq1,comp100722_c0_seq2	1718.88	1667.42	29	1.05	0.75
comp100723_c0	comp100723_c0_seq1,comp100723_c0_seq2,comp100723_c0_seq3,comp100723_c0_seq4,comp100723_c0_seq5	1658.67	1607.22	112	4.21	3.02
comp100724_c1	comp100724_c1_seq1	612	560.56	13	1.41	1.01
comp100724_c4	comp100724_c4_seq1	613	561.56	20	2.17	1.55
comp100724_c5	comp100724_c5_seq1,comp100724_c5_seq2,comp100724_c5_seq3,comp100724_c5_seq4	1033.54	982.08	94	5.8	4.16
comp100724_c6	comp100724_c6_seq1,comp100724_c6_seq2	794.96	743.5	29	2.37	1.7
comp100725_c0	comp100725_c0_seq1	515	463.58	15	1.97	1.41
comp100725_c1	comp100725_c1_seq1	1216	1164.54	357.81	18.61	13.33
comp100725_c3	comp100725_c3_seq1,comp100725_c3_seq2	614.64	563.2	32.73	3.54	2.53
comp100726_c0	comp100726_c0_seq1,comp100726_c0_seq2	1947.88	1896.42	314.44	10.02	7.18
comp100727_c0	comp100727_c0_seq1,comp100727_c0_seq3,comp100727_c0_seq4,comp100727_c0_seq5	1653.24	1601.79	265	10	7.17
comp100728_c0	comp100728_c0_seq1,comp100728_c0_seq2,comp100728_c0_seq3,comp100728_c0_seq4	3166.42	3114.97	247.06	4.79	3.43
comp100729_c0	comp100729_c0_seq1,comp100729_c0_seq2	2323.96	2272.5	1312	34.88	25
comp100730_c1	comp100730_c1_seq1,comp100730_c1_seq2	3148.46	3097	48	0.94	0.67
comp100731_c0	comp100731_c0_seq1,comp100731_c0_seq2,comp100731_c0_seq3,comp100731_c0_seq5	1345.09	1293.63	145.95	6.83	4.89
comp100732_c0	comp100732_c0_seq1	1601	1549.54	67	2.62	1.87
comp100732_c3	comp100732_c3_seq1	660	608.55	4	0.4	0.29
comp100733_c1	comp100733_c1_seq1	522	470.58	4	0.52	0.37
comp100733_c2	comp100733_c2_seq1,comp100733_c2_seq2,comp100733_c2_seq3,comp100733_c2_seq4,comp100733_c2_seq5	1473.93	1422.47	463.97	19.73	14.14
comp100734_c0	comp100734_c0_seq1	520	468.58	9	1.17	0.84
comp100734_c1	comp100734_c1_seq2	690	638.55	7	0.67	0.48
comp100735_c0	comp100735_c0_seq1,comp100735_c0_seq2	2932.33	2880.87	2181.48	45.72	32.77
comp100735_c1	comp100735_c1_seq1	501	449.58	5	0.68	0.49
comp100736_c0	comp100736_c0_seq1	860	808.54	5	0.38	0.27
comp100736_c1	comp100736_c1_seq1,comp100736_c1_seq2,comp100736_c1_seq3,comp100736_c1_seq4,comp100736_c1_seq5	1327.69	1276.24	48	2.28	1.63
comp100737_c0	comp100737_c0_seq1,comp100737_c0_seq2,comp100737_c0_seq3,comp100737_c0_seq4,comp100737_c0_seq5	939.64	888.19	20	1.37	0.98
comp100738_c1	comp100738_c1_seq1,comp100738_c1_seq2,comp100738_c1_seq3,comp100738_c1_seq4,comp100738_c1_seq5	2638.35	2586.89	77	1.8	1.29
comp100738_c3	comp100738_c3_seq1	2053	2001.54	11	0.33	0.24
comp100739_c0	comp100739_c0_seq1,comp100739_c0_seq2,comp100739_c0_seq3,comp100739_c0_seq4,comp100739_c0_seq5	3361.21	3309.75	701.25	12.79	9.17
comp10074_c0	comp10074_c0_seq1	565	513.57	0	0	0
comp100740_c0	comp100740_c0_seq1,comp100740_c0_seq2,comp100740_c0_seq3	773.46	722.01	5571.59	468.69	335.88
comp100741_c0	comp100741_c0_seq1	2623	2571.54	21	0.49	0.35
comp100742_c0	comp100742_c0_seq1,comp100742_c0_seq2,comp100742_c0_seq3,comp100742_c0_seq4,comp100742_c0_seq5	1824.99	1773.53	764.42	26.06	18.67
comp100743_c0	comp100743_c0_seq1,comp100743_c0_seq2,comp100743_c0_seq3,comp100743_c0_seq4,comp100743_c0_seq5	906.65	855.21	38	2.7	1.93
comp100743_c1	comp100743_c1_seq1	533	481.57	65	8.23	5.9
comp100743_c2	comp100743_c2_seq1,comp100743_c2_seq2	700.46	649.01	89	8.34	5.97
comp100743_c3	comp100743_c3_seq1,comp100743_c3_seq2,comp100743_c3_seq5	2346.26	2294.8	723.44	19.04	13.65
comp100744_c0	comp100744_c0_seq1	1139	1087.54	18	1	0.72
comp100744_c1	comp100744_c1_seq1	856	804.54	44	3.32	2.38
comp100744_c2	comp100744_c2_seq1,comp100744_c2_seq2,comp100744_c2_seq3,comp100744_c2_seq4,comp100744_c2_seq5	3280.36	3228.9	1243.77	23.25	16.66
comp100744_c3	comp100744_c3_seq1,comp100744_c3_seq2,comp100744_c3_seq3	3224	3172.54	27	0.51	0.37
comp100744_c4	comp100744_c4_seq1,comp100744_c4_seq2,comp100744_c4_seq3,comp100744_c4_seq4,comp100744_c4_seq5	1751.01	1699.55	706	25.12	18
comp100745_c0	comp100745_c0_seq1	1556	1504.54	10	0.4	0.29
comp100746_c0	comp100746_c0_seq1,comp100746_c0_seq2,comp100746_c0_seq3	1671.32	1619.86	118	4.41	3.16
comp100747_c0	comp100747_c0_seq1	690	638.55	0	0	0
comp100747_c2	comp100747_c2_seq1,comp100747_c2_seq2,comp100747_c2_seq3,comp100747_c2_seq4,comp100747_c2_seq5	1082.97	1031.53	77	4.52	3.24
comp100748_c0	comp100748_c0_seq1	2058	2006.54	194	5.84	4.19
comp100749_c0	comp100749_c0_seq1,comp100749_c0_seq2,comp100749_c0_seq3,comp100749_c0_seq4,comp100749_c0_seq5	2982.01	2930.55	22	0.45	0.32
comp100749_c1	comp100749_c1_seq4	988	936.54	28	1.81	1.3
comp100750_c0	comp100750_c0_seq1	1382	1330.54	10.02	0.46	0.33
comp100751_c0	comp100751_c0_seq1,comp100751_c0_seq2,comp100751_c0_seq3,comp100751_c0_seq5	3132.78	3081.32	780.97	15.3	10.97
comp100752_c0	comp100752_c0_seq1,comp100752_c0_seq2	766.24	714.79	21	1.78	1.28
comp100752_c1	comp100752_c1_seq1	659	607.55	6	0.6	0.43
comp100753_c0	comp100753_c0_seq1,comp100753_c0_seq2,comp100753_c0_seq3,comp100753_c0_seq4,comp100753_c0_seq5	1459.24	1407.78	96.04	4.13	2.96
comp100754_c0	comp100754_c0_seq1,comp100754_c0_seq3,comp100754_c0_seq4,comp100754_c0_seq5	920.75	869.3	90.12	6.29	4.51
comp100755_c0	comp100755_c0_seq1,comp100755_c0_seq2	2225.41	2173.95	222.3	6.18	4.43
comp100756_c0	comp100756_c0_seq1,comp100756_c0_seq2	2171	2119.54	194.99	5.56	3.98
comp100757_c0	comp100757_c0_seq1,comp100757_c0_seq2	1296	1244.54	44	2.14	1.53
comp100758_c0	comp100758_c0_seq2	696	644.55	114	10.75	7.71
comp100759_c0	comp100759_c0_seq1	1557	1505.54	9	0.36	0.26
comp100759_c1	comp100759_c1_seq1,comp100759_c1_seq2,comp100759_c1_seq3,comp100759_c1_seq4,comp100759_c1_seq5	747.36	695.91	66	5.76	4.13
comp100760_c0	comp100760_c0_seq1,comp100760_c0_seq2,comp100760_c0_seq3,comp100760_c0_seq4	5192.86	5141.4	2485.17	29.16	20.9
comp100761_c0	comp100761_c0_seq1,comp100761_c0_seq2,comp100761_c0_seq3,comp100761_c0_seq4,comp100761_c0_seq5	1604.87	1553.41	665.98	25.93	18.58
comp100761_c3	comp100761_c3_seq1	905	853.54	6	0.43	0.31
comp100762_c0	comp100762_c0_seq1,comp100762_c0_seq2,comp100762_c0_seq3,comp100762_c0_seq4,comp100762_c0_seq5	3102.12	3050.66	706.3	13.98	10.02
comp100763_c0	comp100763_c0_seq1	1555	1503.54	193	7.77	5.56
comp100764_c0	comp100764_c0_seq1,comp100764_c0_seq2,comp100764_c0_seq3,comp100764_c0_seq4	2011.38	1959.92	306.23	9.44	6.77
comp100765_c0	comp100765_c0_seq1	569	517.57	7	0.82	0.59
comp100765_c2	comp100765_c2_seq1,comp100765_c2_seq2,comp100765_c2_seq3,comp100765_c2_seq4,comp100765_c2_seq5	1581.46	1530	21	0.83	0.59
comp100766_c0	comp100766_c0_seq1	1519	1467.54	2	0.08	0.06
comp100767_c1	comp100767_c1_seq1,comp100767_c1_seq2,comp100767_c1_seq3,comp100767_c1_seq4,comp100767_c1_seq5	1989.24	1937.78	322	10.04	7.2
comp100767_c3	comp100767_c3_seq1,comp100767_c3_seq2	1742	1690.54	99	3.54	2.54
comp100768_c0	comp100768_c0_seq1,comp100768_c0_seq2,comp100768_c0_seq3,comp100768_c0_seq4,comp100768_c0_seq5	909.18	857.72	22	1.56	1.12
comp100769_c0	comp100769_c0_seq1	831	779.54	29	2.26	1.62
comp100769_c2	comp100769_c2_seq1,comp100769_c2_seq2	1168.83	1117.37	98.96	5.36	3.84
comp100769_c4	comp100769_c4_seq1	712	660.55	3	0.28	0.2
comp100769_c5	comp100769_c5_seq2,comp100769_c5_seq3,comp100769_c5_seq4,comp100769_c5_seq5	1095.53	1044.07	175	10.16	7.28
comp100769_c8	comp100769_c8_seq1	642	590.56	27	2.78	1.99
comp100769_c9	comp100769_c9_seq1	1109	1057.54	79	4.53	3.24
comp100770_c0	comp100770_c0_seq1,comp100770_c0_seq2,comp100770_c0_seq3,comp100770_c0_seq4,comp100770_c0_seq5	983.25	931.79	370.49	24.11	17.28
comp100771_c0	comp100771_c0_seq1,comp100771_c0_seq2,comp100771_c0_seq3,comp100771_c0_seq4,comp100771_c0_seq5	1647.62	1596.16	257.13	9.74	6.98
comp100772_c0	comp100772_c0_seq1	3053	3001.54	1015.27	20.42	14.63
comp100773_c0	comp100773_c0_seq1,comp100773_c0_seq2,comp100773_c0_seq3,comp100773_c0_seq4,comp100773_c0_seq5	2202.87	2151.41	128.99	3.62	2.6
comp100773_c1	comp100773_c1_seq1	992	940.54	21	1.35	0.97
comp100774_c0	comp100774_c0_seq1,comp100774_c0_seq2,comp100774_c0_seq3,comp100774_c0_seq4	1077.05	1025.59	23	1.36	0.97
comp100775_c0	comp100775_c0_seq1	702	650.55	19	1.78	1.27
comp100775_c3	comp100775_c3_seq3	614	562.56	4	0.43	0.31
comp100776_c0	comp100776_c0_seq1,comp100776_c0_seq5	1688.77	1637.33	26	0.96	0.69
comp100777_c0	comp100777_c0_seq1,comp100777_c0_seq2,comp100777_c0_seq3,comp100777_c0_seq4,comp100777_c0_seq5	1289.04	1237.58	236	11.55	8.27
comp100778_c0	comp100778_c0_seq1,comp100778_c0_seq2,comp100778_c0_seq3,comp100778_c0_seq4,comp100778_c0_seq5	2640.23	2588.77	1916.32	44.71	32.04
comp100779_c0	comp100779_c0_seq1,comp100779_c0_seq2,comp100779_c0_seq3,comp100779_c0_seq4,comp100779_c0_seq5	657.59	606.14	255.26	25.61	18.36
comp100780_c0	comp100780_c0_seq1,comp100780_c0_seq2,comp100780_c0_seq3,comp100780_c0_seq5	1050.26	998.81	136	8.25	5.91
comp100781_c0	comp100781_c0_seq1,comp100781_c0_seq2,comp100781_c0_seq3,comp100781_c0_seq4,comp100781_c0_seq5	2502	2450.54	81	2	1.43
comp100782_c1	comp100782_c1_seq1,comp100782_c1_seq2,comp100782_c1_seq3	2688.01	2636.55	180	4.12	2.95
comp100783_c1	comp100783_c1_seq1,comp100783_c1_seq2	1282.75	1231.29	14	0.69	0.49
comp1007839_c0	comp1007839_c0_seq1	614	562.56	2	0.22	0.16
comp100784_c0	comp100784_c0_seq1,comp100784_c0_seq2,comp100784_c0_seq3	886.58	835.12	84.24	6.12	4.39
comp100784_c1	comp100784_c1_seq1,comp100784_c1_seq2,comp100784_c1_seq3,comp100784_c1_seq4,comp100784_c1_seq5	1044.46	993	180.02	10.99	7.87
comp100785_c0	comp100785_c0_seq1	1414	1362.54	48	2.13	1.53
comp100786_c0	comp100786_c0_seq1,comp100786_c0_seq2,comp100786_c0_seq3,comp100786_c0_seq4,comp100786_c0_seq5	2310.24	2258.79	716.36	19.16	13.73
comp100786_c4	comp100786_c4_seq2,comp100786_c4_seq3	2440.3	2388.84	145	3.67	2.63
comp100787_c2	comp100787_c2_seq1,comp100787_c2_seq2,comp100787_c2_seq3,comp100787_c2_seq4,comp100787_c2_seq5	1001.55	950.09	94	6	4.3
comp100787_c3	comp100787_c3_seq1,comp100787_c3_seq2	672.98	621.53	42	4.11	2.94
comp100788_c0	comp100788_c0_seq1,comp100788_c0_seq2,comp100788_c0_seq3	1710.45	1658.99	250	9.11	6.53
comp100789_c0	comp100789_c0_seq1,comp100789_c0_seq2,comp100789_c0_seq3	2686.57	2635.11	1867	42.79	30.66
comp100790_c2	comp100790_c2_seq1	807	755.54	18	1.45	1.04
comp100790_c3	comp100790_c3_seq1,comp100790_c3_seq2,comp100790_c3_seq3,comp100790_c3_seq4	1135.75	1084.3	55	3.07	2.2
comp100791_c0	comp100791_c0_seq1,comp100791_c0_seq2,comp100791_c0_seq3,comp100791_c0_seq4,comp100791_c0_seq5	3551.95	3500.49	9169.6	158.11	113.3
comp100792_c0	comp100792_c0_seq1,comp100792_c0_seq2,comp100792_c0_seq3,comp100792_c0_seq4,comp100792_c0_seq5	1392.53	1341.08	163	7.36	5.27
comp100793_c0	comp100793_c0_seq1,comp100793_c0_seq2	741.6	690.14	81.98	7.22	5.17
comp100795_c0	comp100795_c0_seq2	567	515.57	21	2.48	1.78
comp100795_c1	comp100795_c1_seq1,comp100795_c1_seq2	1008.61	957.16	121	7.66	5.49
comp100795_c2	comp100795_c2_seq1	902	850.54	17	1.21	0.87
comp100796_c2	comp100796_c2_seq1,comp100796_c2_seq2,comp100796_c2_seq3,comp100796_c2_seq4,comp100796_c2_seq5	1500.9	1449.44	94.13	3.93	2.82
comp100796_c5	comp100796_c5_seq1	565	513.57	34.01	4.03	2.89
comp100797_c0	comp100797_c0_seq1,comp100797_c0_seq2,comp100797_c0_seq3,comp100797_c0_seq4	3187.71	3136.25	694.37	13.37	9.58
comp100798_c0	comp100798_c0_seq1,comp100798_c0_seq2,comp100798_c0_seq3,comp100798_c0_seq4,comp100798_c0_seq5	2491.56	2440.1	2292.19	56.74	40.66
comp100799_c0	comp100799_c0_seq1,comp100799_c0_seq2,comp100799_c0_seq3	1199.45	1147.99	65.03	3.43	2.46
comp100801_c0	comp100801_c0_seq1,comp100801_c0_seq2,comp100801_c0_seq4,comp100801_c0_seq5	1345.29	1293.83	697.38	32.63	23.38
comp100802_c0	comp100802_c0_seq1	1046	994.54	13	0.79	0.57
comp100802_c1	comp100802_c1_seq1,comp100802_c1_seq2,comp100802_c1_seq3	864.23	812.78	49	3.66	2.62
comp100802_c4	comp100802_c4_seq1	737	685.55	18	1.6	1.14
comp100803_c0	comp100803_c0_seq1,comp100803_c0_seq2	3377.8	3326.34	1338.25	24.29	17.4
comp100804_c0	comp100804_c0_seq1,comp100804_c0_seq2,comp100804_c0_seq3,comp100804_c0_seq4,comp100804_c0_seq5	3307.04	3255.58	188.14	3.49	2.5
comp100805_c0	comp100805_c0_seq1,comp100805_c0_seq2,comp100805_c0_seq3,comp100805_c0_seq4,comp100805_c0_seq5	1643.35	1591.9	995.79	37.83	27.11
comp100806_c0	comp100806_c0_seq1	795	743.54	16	1.31	0.94
comp100806_c1	comp100806_c1_seq1,comp100806_c1_seq2,comp100806_c1_seq3,comp100806_c1_seq4,comp100806_c1_seq5	1387.81	1336.35	208	9.42	6.75
comp100807_c0	comp100807_c0_seq1	715	663.55	172	15.75	11.29
comp100808_c2	comp100808_c2_seq1,comp100808_c2_seq2,comp100808_c2_seq3,comp100808_c2_seq4,comp100808_c2_seq5	781.76	730.31	80	6.65	4.77
comp100809_c0	comp100809_c0_seq2,comp100809_c0_seq4,comp100809_c0_seq5	723.31	671.86	30	2.71	1.94
comp10081_c0	comp10081_c0_seq1	861	809.54	8	0.6	0.43
comp100810_c0	comp100810_c0_seq1	1444	1392.54	17	0.74	0.53
comp100810_c1	comp100810_c1_seq1	502	450.58	1	0.14	0.1
comp100811_c0	comp100811_c0_seq1	621	569.56	1	0.11	0.08
comp100811_c2	comp100811_c2_seq1,comp100811_c2_seq2,comp100811_c2_seq3,comp100811_c2_seq5	855.64	804.18	67	5.06	3.62
comp100812_c0	comp100812_c0_seq2,comp100812_c0_seq3,comp100812_c0_seq4,comp100812_c0_seq5	1339.61	1288.17	117	5.5	3.94
comp100813_c0	comp100813_c0_seq1	1749	1697.54	14.42	0.51	0.37
comp100813_c1	comp100813_c1_seq1,comp100813_c1_seq3	557.02	505.59	4	0.48	0.35
comp100814_c0	comp100814_c0_seq1	2359	2307.54	213.01	5.58	4
comp100815_c1	comp100815_c1_seq1	1395	1343.54	13	0.59	0.42
comp100815_c2	comp100815_c2_seq1,comp100815_c2_seq2,comp100815_c2_seq3,comp100815_c2_seq4,comp100815_c2_seq5	2169.25	2117.8	931.65	26.58	19.05
comp100816_c0	comp100816_c0_seq1	1064	1012.54	17	1.02	0.73
comp100817_c0	comp100817_c0_seq1,comp100817_c0_seq2,comp100817_c0_seq3,comp100817_c0_seq5	825.29	773.83	30.01	2.35	1.69
comp100818_c0	comp100818_c0_seq1,comp100818_c0_seq2	659.91	608.47	19	1.9	1.36
comp100818_c1	comp100818_c1_seq1	723	671.55	11	1	0.71
comp100818_c2	comp100818_c2_seq1,comp100818_c2_seq2,comp100818_c2_seq3,comp100818_c2_seq4	1545.18	1493.72	164.07	6.64	4.76
comp100819_c0	comp100819_c0_seq1,comp100819_c0_seq2,comp100819_c0_seq3,comp100819_c0_seq5	4253.47	4202.01	2724.5	39.12	28.04
comp100820_c0	comp100820_c0_seq1,comp100820_c0_seq2,comp100820_c0_seq3,comp100820_c0_seq5	2112.71	2061.25	720.95	21.14	15.15
comp100821_c0	comp100821_c0_seq1,comp100821_c0_seq2,comp100821_c0_seq3,comp100821_c0_seq4,comp100821_c0_seq5	766	714.54	1	0.09	0.06
comp100821_c1	comp100821_c1_seq1,comp100821_c1_seq2,comp100821_c1_seq3,comp100821_c1_seq4	1851.69	1800.24	24	0.81	0.58
comp100822_c0	comp100822_c0_seq1	624	572.56	10	1.06	0.76
comp100822_c1	comp100822_c1_seq1	587	535.56	9	1.02	0.73
comp100823_c0	comp100823_c0_seq1	1390	1338.54	20	0.9	0.65
comp100823_c1	comp100823_c1_seq1,comp100823_c1_seq2	592.99	541.56	6	0.67	0.48
comp100823_c2	comp100823_c2_seq1	565	513.57	31	3.68	2.64
comp100824_c1	comp100824_c1_seq2,comp100824_c1_seq3,comp100824_c1_seq4,comp100824_c1_seq5	2012.85	1961.39	239	7.36	5.28
comp100824_c2	comp100824_c2_seq1	1667	1615.54	22.01	0.82	0.59
comp100824_c3	comp100824_c3_seq1	821	769.54	6	0.47	0.34
comp100825_c0	comp100825_c0_seq1	1843	1791.54	232	7.83	5.61
comp100826_c0	comp100826_c0_seq1,comp100826_c0_seq2,comp100826_c0_seq3,comp100826_c0_seq5	1795.93	1744.48	1627.93	56.42	40.43
comp100827_c0	comp100827_c0_seq1,comp100827_c0_seq2,comp100827_c0_seq3,comp100827_c0_seq4,comp100827_c0_seq5	1020.46	969	260	16.27	11.66
comp100828_c0	comp100828_c0_seq1	1631	1579.54	1400.18	53.61	38.42
comp100828_c1	comp100828_c1_seq2,comp100828_c1_seq3,comp100828_c1_seq4,comp100828_c1_seq5	3918.75	3867.29	1553.13	24.24	17.37
comp100829_c0	comp100829_c0_seq1,comp100829_c0_seq2	2944	2892.54	88	1.84	1.32
comp100830_c0	comp100830_c0_seq1	1339	1287.54	127	5.97	4.28
comp100831_c0	comp100831_c0_seq2	538	486.57	0	0	0
comp100832_c0	comp100832_c0_seq1,comp100832_c0_seq2,comp100832_c0_seq3,comp100832_c0_seq4	997.82	946.36	11	0.7	0.5
comp100833_c0	comp100833_c0_seq1,comp100833_c0_seq2,comp100833_c0_seq3,comp100833_c0_seq4,comp100833_c0_seq5	1026.5	975.04	267.99	16.66	11.94
comp100834_c3	comp100834_c3_seq1	1037	985.54	76	4.67	3.35
comp100834_c4	comp100834_c4_seq1,comp100834_c4_seq2,comp100834_c4_seq3,comp100834_c4_seq4,comp100834_c4_seq5	1850.02	1798.57	177	5.95	4.26
comp100835_c0	comp100835_c0_seq1	1520	1468.54	2	0.08	0.06
comp100835_c1	comp100835_c1_seq1,comp100835_c1_seq2,comp100835_c1_seq3,comp100835_c1_seq5	1647.36	1595.9	34	1.29	0.92
comp100836_c0	comp100836_c0_seq1	959	907.54	14	0.94	0.67
comp100836_c1	comp100836_c1_seq1,comp100836_c1_seq2,comp100836_c1_seq3,comp100836_c1_seq4,comp100836_c1_seq5	792.83	741.37	23.02	1.89	1.35
comp1008361_c0	comp1008361_c0_seq1	680	628.55	0	0	0
comp100837_c0	comp100837_c0_seq1	1137	1085.54	3	0.17	0.12
comp100837_c1	comp100837_c1_seq2,comp100837_c1_seq3,comp100837_c1_seq4	2354.49	2303.03	45.17	1.18	0.85
comp100838_c1	comp100838_c1_seq1	787	735.54	21	1.73	1.24
comp100838_c2	comp100838_c2_seq1,comp100838_c2_seq2,comp100838_c2_seq3,comp100838_c2_seq4,comp100838_c2_seq5	907.62	856.17	227	16.08	11.53
comp100839_c0	comp100839_c0_seq1	1692	1640.54	316	11.65	8.35
comp100839_c1	comp100839_c1_seq1,comp100839_c1_seq3,comp100839_c1_seq4	778.68	727.22	274.99	22.97	16.46
comp100839_c2	comp100839_c2_seq1,comp100839_c2_seq2	1846.34	1794.88	511.2	17.22	12.34
comp100840_c0	comp100840_c0_seq1,comp100840_c0_seq2,comp100840_c0_seq3,comp100840_c0_seq4,comp100840_c0_seq5	2876.38	2824.92	120.88	2.58	1.85
comp100841_c0	comp100841_c0_seq1,comp100841_c0_seq2,comp100841_c0_seq3,comp100841_c0_seq4	2012.83	1961.37	209.72	6.46	4.63
comp100842_c0	comp100842_c0_seq1	2073	2021.54	68	2.03	1.46
comp100842_c1	comp100842_c1_seq1	719	667.55	24	2.19	1.57
comp100842_c2	comp100842_c2_seq1,comp100842_c2_seq2,comp100842_c2_seq3,comp100842_c2_seq4	2018.9	1967.45	781.92	24.02	17.21
comp100843_c0	comp100843_c0_seq1,comp100843_c0_seq2,comp100843_c0_seq3,comp100843_c0_seq5	883.2	831.75	29	2.12	1.52
comp100844_c0	comp100844_c0_seq1	5141	5089.54	3591.95	42.57	30.51
comp100845_c0	comp100845_c0_seq1,comp100845_c0_seq2,comp100845_c0_seq3,comp100845_c0_seq4,comp100845_c0_seq5	1888.89	1837.43	262	8.62	6.18
comp100846_c0	comp100846_c0_seq1,comp100846_c0_seq2,comp100846_c0_seq3,comp100846_c0_seq5	1383.46	1332.01	120	5.45	3.91
comp100847_c0	comp100847_c0_seq1,comp100847_c0_seq2,comp100847_c0_seq3,comp100847_c0_seq4,comp100847_c0_seq5	4062.4	4010.94	2282.96	34.35	24.61
comp100847_c1	comp100847_c1_seq1	613	561.56	2	0.22	0.16
comp100848_c0	comp100848_c0_seq1,comp100848_c0_seq2,comp100848_c0_seq3,comp100848_c0_seq4,comp100848_c0_seq5	1757.91	1706.45	499	17.68	12.67
comp100849_c0	comp100849_c0_seq1,comp100849_c0_seq2,comp100849_c0_seq3,comp100849_c0_seq4,comp100849_c0_seq5	1412.01	1360.56	58.36	2.6	1.86
comp100849_c2	comp100849_c2_seq1	500	448.58	10	1.36	0.97
comp100850_c2	comp100850_c2_seq2,comp100850_c2_seq3,comp100850_c2_seq4,comp100850_c2_seq5	1034.36	982.92	133	8.2	5.88
comp100851_c0	comp100851_c0_seq1	906	854.54	4	0.28	0.2
comp100851_c1	comp100851_c1_seq1	644	592.56	178	18.27	13.1
comp100851_c2	comp100851_c2_seq1,comp100851_c2_seq2,comp100851_c2_seq3,comp100851_c2_seq4,comp100851_c2_seq5	1811.47	1760.01	436	14.98	10.73
comp100852_c0	comp100852_c0_seq1,comp100852_c0_seq2,comp100852_c0_seq3	1172.29	1120.84	136.05	7.35	5.27
comp100852_c1	comp100852_c1_seq1,comp100852_c1_seq2,comp100852_c1_seq3	815.98	764.53	42	3.34	2.39
comp100853_c0	comp100853_c0_seq1,comp100853_c0_seq2	2078.02	2026.57	261	7.78	5.58
comp100853_c1	comp100853_c1_seq1,comp100853_c1_seq2	1151.97	1100.51	39	2.15	1.54
comp100854_c0	comp100854_c0_seq1,comp100854_c0_seq2,comp100854_c0_seq3	1203.32	1151.87	43	2.26	1.62
comp100855_c0	comp100855_c0_seq1,comp100855_c0_seq2	772.21	720.75	10	0.84	0.6
comp100855_c1	comp100855_c1_seq1,comp100855_c1_seq2,comp100855_c1_seq4	890.2	838.75	14	1.01	0.73
comp100855_c4	comp100855_c4_seq1	1145	1093.54	7.25	0.4	0.29
comp100855_c5	comp100855_c5_seq1	1278	1226.54	51	2.52	1.8
comp100855_c6	comp100855_c6_seq1,comp100855_c6_seq2,comp100855_c6_seq4,comp100855_c6_seq5	1053.94	1002.48	21	1.27	0.91
comp100856_c0	comp100856_c0_seq2	1537	1485.54	37.89	1.54	1.11
comp100857_c1	comp100857_c1_seq1,comp100857_c1_seq2,comp100857_c1_seq3,comp100857_c1_seq4,comp100857_c1_seq5	1499.82	1448.36	1302.73	54.42	39
comp100858_c0	comp100858_c0_seq1,comp100858_c0_seq2,comp100858_c0_seq3	991.71	940.25	318.17	20.52	14.7
comp100858_c1	comp100858_c1_seq1	1687	1635.54	3701	136.84	98.07
comp100858_c2	comp100858_c2_seq1	1158	1106.54	105.53	5.78	4.14
comp100859_c0	comp100859_c0_seq1	2321	2269.54	2753.94	73.31	52.53
comp100859_c1	comp100859_c1_seq1,comp100859_c1_seq2	3556.57	3505.11	943.99	16.26	11.65
comp100860_c0	comp100860_c0_seq1	2679	2627.54	1092	25.1	17.99
comp100861_c0	comp100861_c0_seq1,comp100861_c0_seq2	3551.23	3499.77	707.95	12.21	8.75
comp100862_c0	comp100862_c0_seq1	1902	1850.54	1203	39.3	28.16
comp100863_c0	comp100863_c0_seq1,comp100863_c0_seq2,comp100863_c0_seq3	1617.93	1566.48	69	2.66	1.91
comp100864_c0	comp100864_c0_seq1,comp100864_c0_seq2,comp100864_c0_seq3,comp100864_c0_seq4,comp100864_c0_seq5	1100.25	1048.79	190	10.98	7.87
comp100865_c0	comp100865_c0_seq1,comp100865_c0_seq2,comp100865_c0_seq3,comp100865_c0_seq4,comp100865_c0_seq5	1569.12	1517.66	969.01	38.62	27.68
comp100866_c0	comp100866_c0_seq1,comp100866_c0_seq2,comp100866_c0_seq3	1914.7	1863.24	96	3.11	2.23
comp100867_c0	comp100867_c0_seq1	3813	3761.54	81	1.3	0.93
comp100868_c0	comp100868_c0_seq1,comp100868_c0_seq2,comp100868_c0_seq3,comp100868_c0_seq4,comp100868_c0_seq5	1584.28	1532.82	533.99	21.07	15.1
comp100868_c1	comp100868_c1_seq1,comp100868_c1_seq2	1179.73	1128.27	345.97	18.57	13.31
comp100868_c2	comp100868_c2_seq1	1236	1184.54	949	48.51	34.77
comp100869_c0	comp100869_c0_seq2,comp100869_c0_seq3,comp100869_c0_seq4,comp100869_c0_seq5	1062.85	1011.4	436	26.12	18.72
comp100869_c1	comp100869_c1_seq1,comp100869_c1_seq2,comp100869_c1_seq3	652.38	600.95	141	14.27	10.23
comp100869_c3	comp100869_c3_seq1,comp100869_c3_seq2,comp100869_c3_seq3,comp100869_c3_seq4	979.58	928.13	205	13.39	9.6
comp100870_c0	comp100870_c0_seq1,comp100870_c0_seq2,comp100870_c0_seq3,comp100870_c0_seq5	1983.84	1932.38	562.55	17.6	12.61
comp100871_c0	comp100871_c0_seq1,comp100871_c0_seq2,comp100871_c0_seq3,comp100871_c0_seq4,comp100871_c0_seq5	1938.36	1886.9	264	8.46	6.06
comp100872_c0	comp100872_c0_seq1	1147	1095.54	24	1.33	0.95
comp100873_c0	comp100873_c0_seq1,comp100873_c0_seq2,comp100873_c0_seq3,comp100873_c0_seq4,comp100873_c0_seq5	2534.81	2483.35	664	16.15	11.57
comp100873_c1	comp100873_c1_seq4	516	464.58	24.39	3.2	2.29
comp100873_c2	comp100873_c2_seq1,comp100873_c2_seq2,comp100873_c2_seq3,comp100873_c2_seq4,comp100873_c2_seq5	3859.52	3808.07	402	6.37	4.57
comp100873_c3	comp100873_c3_seq1,comp100873_c3_seq2,comp100873_c3_seq3,comp100873_c3_seq4,comp100873_c3_seq5	1200.39	1148.93	462	24.35	17.45
comp100874_c0	comp100874_c0_seq1,comp100874_c0_seq2,comp100874_c0_seq3,comp100874_c0_seq4	1280	1228.54	22	1.08	0.78
comp100875_c0	comp100875_c0_seq2,comp100875_c0_seq4,comp100875_c0_seq5	1032.9	981.44	69	4.26	3.05
comp100875_c2	comp100875_c2_seq1	532	480.57	28	3.55	2.55
comp100875_c5	comp100875_c5_seq2,comp100875_c5_seq3	1297.16	1245.71	85	4.13	2.96
comp100875_c6	comp100875_c6_seq1	584	532.56	8	0.91	0.66
comp100875_c8	comp100875_c8_seq1,comp100875_c8_seq2,comp100875_c8_seq3,comp100875_c8_seq4,comp100875_c8_seq5	968.05	916.59	71	4.7	3.37
comp100876_c1	comp100876_c1_seq1,comp100876_c1_seq3,comp100876_c1_seq4,comp100876_c1_seq5	781.83	730.37	362	30.1	21.57
comp100877_c0	comp100877_c0_seq1,comp100877_c0_seq2,comp100877_c0_seq3,comp100877_c0_seq4,comp100877_c0_seq5	672.98	621.54	27.01	2.64	1.89
comp1008777_c0	comp1008777_c0_seq1	510	458.58	2	0.27	0.19
comp100878_c0	comp100878_c0_seq1,comp100878_c0_seq2,comp100878_c0_seq3	2473.41	2421.95	580	14.47	10.37
comp100879_c1	comp100879_c1_seq1,comp100879_c1_seq2,comp100879_c1_seq3,comp100879_c1_seq4,comp100879_c1_seq5	2108.68	2057.23	221.4	6.5	4.66
comp100880_c0	comp100880_c0_seq1	1582	1530.54	952.16	37.63	26.97
comp100881_c0	comp100881_c0_seq1,comp100881_c0_seq2	2141.34	2089.88	364	10.52	7.54
comp100882_c0	comp100882_c0_seq2,comp100882_c0_seq3,comp100882_c0_seq5	893.77	842.32	70	5.04	3.61
comp100883_c0	comp100883_c0_seq1,comp100883_c0_seq2,comp100883_c0_seq3,comp100883_c0_seq4,comp100883_c0_seq5	2979.31	2927.85	357.54	7.37	5.28
comp100884_c0	comp100884_c0_seq1,comp100884_c0_seq2,comp100884_c0_seq5	733.1	681.67	24	2.14	1.53
comp100885_c0	comp100885_c0_seq2,comp100885_c0_seq4	705.11	653.66	59	5.49	3.93
comp100886_c0	comp100886_c0_seq1,comp100886_c0_seq2	1466	1414.54	68	2.91	2.08
comp100886_c1	comp100886_c1_seq1,comp100886_c1_seq2,comp100886_c1_seq5	1464.91	1413.46	228	9.76	6.99
comp100887_c0	comp100887_c0_seq1,comp100887_c0_seq2	680.79	629.36	109	10.53	7.55
comp100887_c1	comp100887_c1_seq1	541	489.57	42	5.23	3.75
comp100887_c2	comp100887_c2_seq2,comp100887_c2_seq3,comp100887_c2_seq4,comp100887_c2_seq5	2861.32	2809.86	336	7.22	5.17
comp100888_c0	comp100888_c0_seq1,comp100888_c0_seq2,comp100888_c0_seq3,comp100888_c0_seq4,comp100888_c0_seq5	1512	1460.54	76	3.15	2.26
comp100889_c0	comp100889_c0_seq1,comp100889_c0_seq2	827.19	775.74	103	8.06	5.78
comp100890_c0	comp100890_c0_seq1	588	536.56	0	0	0
comp100890_c1	comp100890_c1_seq1,comp100890_c1_seq2,comp100890_c1_seq3,comp100890_c1_seq4,comp100890_c1_seq5	1138.52	1087.06	62	3.46	2.48
comp100890_c2	comp100890_c2_seq1,comp100890_c2_seq2,comp100890_c2_seq3,comp100890_c2_seq4,comp100890_c2_seq5	2244.92	2193.46	1388.08	38.23	27.4
comp100890_c3	comp100890_c3_seq1,comp100890_c3_seq2	823.27	771.81	7	0.55	0.39
comp100891_c0	comp100891_c0_seq2,comp100891_c0_seq3,comp100891_c0_seq4	1258.14	1206.68	205	10.29	7.37
comp100891_c2	comp100891_c2_seq1,comp100891_c2_seq3	977.89	926.44	44	2.88	2.06
comp100892_c0	comp100892_c0_seq1,comp100892_c0_seq2,comp100892_c0_seq3,comp100892_c0_seq4,comp100892_c0_seq5	1666.68	1615.23	155	5.8	4.16
comp1008922_c0	comp1008922_c0_seq1	529	477.58	4	0.51	0.37
comp100893_c0	comp100893_c0_seq1,comp100893_c0_seq2,comp100893_c0_seq3,comp100893_c0_seq4,comp100893_c0_seq5	4143.77	4092.32	186	2.74	1.97
comp100894_c2	comp100894_c2_seq1,comp100894_c2_seq2,comp100894_c2_seq3,comp100894_c2_seq4,comp100894_c2_seq5	1520.28	1468.83	390.39	16.08	11.52
comp100895_c0	comp100895_c0_seq1,comp100895_c0_seq2,comp100895_c0_seq3,comp100895_c0_seq4,comp100895_c0_seq5	1970.75	1919.29	4871.79	153.42	109.95
comp100896_c0	comp100896_c0_seq1,comp100896_c0_seq2,comp100896_c0_seq3,comp100896_c0_seq4,comp100896_c0_seq5	2008.28	1956.83	981.95	30.33	21.73
comp100897_c0	comp100897_c0_seq1,comp100897_c0_seq2,comp100897_c0_seq3,comp100897_c0_seq4,comp100897_c0_seq5	1269.38	1217.94	83	4.13	2.96
comp100897_c2	comp100897_c2_seq1,comp100897_c2_seq2,comp100897_c2_seq3,comp100897_c2_seq4,comp100897_c2_seq5	860.71	809.26	43	3.22	2.31
comp100897_c3	comp100897_c3_seq1,comp100897_c3_seq2	1162.38	1110.93	84	4.58	3.28
comp100898_c0	comp100898_c0_seq2	563	511.57	0	0	0
comp100898_c2	comp100898_c2_seq1,comp100898_c2_seq2,comp100898_c2_seq3,comp100898_c2_seq4,comp100898_c2_seq5	2117.59	2066.14	82	2.4	1.72
comp100899_c0	comp100899_c0_seq1	3080	3028.54	2353	46.91	33.61
comp100899_c1	comp100899_c1_seq1	931	879.54	956	65.93	47.24
comp100900_c0	comp100900_c0_seq1	922	870.54	43	3	2.15
comp100901_c0	comp100901_c0_seq1	2452	2400.54	48	1.21	0.87
comp100902_c0	comp100902_c0_seq1	1397	1345.54	6	0.27	0.19
comp100902_c1	comp100902_c1_seq1	936	884.54	7	0.48	0.34
comp100902_c2	comp100902_c2_seq1,comp100902_c2_seq2,comp100902_c2_seq3	2404.42	2352.96	124.01	3.18	2.28
comp100903_c0	comp100903_c0_seq1,comp100903_c0_seq2	608.15	556.71	31	3.39	2.43
comp100903_c1	comp100903_c1_seq1,comp100903_c1_seq2	881.58	830.13	69	5.04	3.61
comp100903_c4	comp100903_c4_seq2,comp100903_c4_seq3	1897.71	1846.25	185	6.06	4.34
comp100904_c0	comp100904_c0_seq1,comp100904_c0_seq2	5120	5068.54	90	1.07	0.77
comp100905_c0	comp100905_c0_seq1,comp100905_c0_seq2	2818.51	2767.05	144	3.14	2.25
comp100906_c0	comp100906_c0_seq1,comp100906_c0_seq2	1827	1775.54	40.91	1.39	1
comp100907_c0	comp100907_c0_seq1,comp100907_c0_seq2	1105.06	1053.6	27	1.55	1.11
comp100908_c0	comp100908_c0_seq1	3329	3277.54	1069	19.69	14.11
comp1009082_c0	comp1009082_c0_seq1	573	521.57	12	1.4	1
comp100909_c0	comp100909_c0_seq1	1691	1639.54	351	12.95	9.28
comp100909_c2	comp100909_c2_seq1,comp100909_c2_seq2,comp100909_c2_seq3,comp100909_c2_seq4,comp100909_c2_seq5	1845.1	1793.65	421.17	14.2	10.17
comp100910_c0	comp100910_c0_seq1,comp100910_c0_seq3,comp100910_c0_seq4,comp100910_c0_seq5	2333.82	2282.36	196.79	5.21	3.73
comp100911_c0	comp100911_c0_seq1	567	515.57	3	0.35	0.25
comp100911_c3	comp100911_c3_seq1,comp100911_c3_seq2,comp100911_c3_seq3,comp100911_c3_seq4,comp100911_c3_seq5	1633.4	1581.94	325.69	12.45	8.92
comp100911_c4	comp100911_c4_seq1	535	483.57	0	0	0
comp100912_c2	comp100912_c2_seq1,comp100912_c2_seq2,comp100912_c2_seq3,comp100912_c2_seq4,comp100912_c2_seq5	3745.83	3694.37	1152.33	18.82	13.49
comp100912_c3	comp100912_c3_seq1	1121	1069.54	5	0.28	0.2
comp100913_c0	comp100913_c0_seq1,comp100913_c0_seq2,comp100913_c0_seq4,comp100913_c0_seq5	1059.76	1008.3	32.81	1.97	1.41
comp100913_c2	comp100913_c2_seq1	1442	1390.54	23.72	1.03	0.74
comp100913_c4	comp100913_c4_seq1	844	792.54	37	2.83	2.03
comp100914_c0	comp100914_c0_seq1,comp100914_c0_seq2,comp100914_c0_seq3,comp100914_c0_seq4,comp100914_c0_seq5	1980.77	1929.31	117.08	3.67	2.63
comp100914_c1	comp100914_c1_seq1	934	882.54	3	0.21	0.15
comp100914_c2	comp100914_c2_seq1,comp100914_c2_seq2,comp100914_c2_seq3,comp100914_c2_seq4,comp100914_c2_seq5	1293.51	1242.06	25	1.22	0.87
comp100914_c3	comp100914_c3_seq1,comp100914_c3_seq2	1030.48	979.02	20	1.24	0.89
comp100914_c4	comp100914_c4_seq1	1525	1473.54	10	0.41	0.29
comp100914_c5	comp100914_c5_seq1,comp100914_c5_seq2,comp100914_c5_seq3,comp100914_c5_seq5	1195.41	1143.95	58	3.07	2.2
comp100915_c1	comp100915_c1_seq1,comp100915_c1_seq2,comp100915_c1_seq3,comp100915_c1_seq4,comp100915_c1_seq5	1241.36	1189.9	61	3.1	2.22
comp100916_c0	comp100916_c0_seq1,comp100916_c0_seq2,comp100916_c0_seq3,comp100916_c0_seq4,comp100916_c0_seq5	1149.88	1098.42	102	5.63	4.03
comp100916_c1	comp100916_c1_seq1	996	944.54	8	0.51	0.37
comp100917_c0	comp100917_c0_seq1,comp100917_c0_seq2,comp100917_c0_seq3,comp100917_c0_seq4,comp100917_c0_seq5	2244.31	2192.85	849.46	23.4	16.77
comp100918_c1	comp100918_c1_seq1	587	535.56	3	0.34	0.24
comp100918_c5	comp100918_c5_seq1,comp100918_c5_seq2,comp100918_c5_seq3,comp100918_c5_seq5	706.3	654.85	46.85	4.35	3.12
comp100919_c0	comp100919_c0_seq1,comp100919_c0_seq2,comp100919_c0_seq3,comp100919_c0_seq4	2339.91	2288.46	1479.95	39.07	28
comp100920_c0	comp100920_c0_seq1,comp100920_c0_seq2,comp100920_c0_seq3,comp100920_c0_seq4,comp100920_c0_seq5	2369.4	2317.94	117.03	3.05	2.19
comp100921_c0	comp100921_c0_seq1,comp100921_c0_seq2,comp100921_c0_seq3,comp100921_c0_seq4	1361.68	1310.23	110	5.08	3.64
comp100921_c1	comp100921_c1_seq1,comp100921_c1_seq2,comp100921_c1_seq3	1560.13	1508.68	17	0.68	0.49
comp100922_c0	comp100922_c0_seq1,comp100922_c0_seq2,comp100922_c0_seq3,comp100922_c0_seq4,comp100922_c0_seq5	1247.69	1196.23	4119.8	208.54	149.44
comp100923_c1	comp100923_c1_seq1,comp100923_c1_seq3,comp100923_c1_seq4,comp100923_c1_seq5	3273.79	3222.33	1164.58	21.82	15.63
comp100924_c1	comp100924_c1_seq1	1271	1219.54	38	1.89	1.35
comp100925_c0	comp100925_c0_seq1,comp100925_c0_seq2,comp100925_c0_seq3,comp100925_c0_seq4	933.81	882.35	130	8.94	6.4
comp100925_c3	comp100925_c3_seq1	547	495.57	59	7.26	5.2
comp100926_c1	comp100926_c1_seq1,comp100926_c1_seq2,comp100926_c1_seq3,comp100926_c1_seq4,comp100926_c1_seq5	1333.59	1282.13	93	4.39	3.15
comp100927_c0	comp100927_c0_seq1,comp100927_c0_seq2,comp100927_c0_seq3,comp100927_c0_seq4,comp100927_c0_seq5	1506.97	1455.51	169.11	7.03	5.04
comp100928_c0	comp100928_c0_seq1,comp100928_c0_seq2,comp100928_c0_seq3,comp100928_c0_seq4,comp100928_c0_seq5	2101.79	2050.33	1893.1	55.8	39.98
comp100929_c0	comp100929_c0_seq2,comp100929_c0_seq3	665.44	613.99	195	19.32	13.84
comp100929_c2	comp100929_c2_seq1	641	589.56	113	11.66	8.36
comp100929_c3	comp100929_c3_seq1,comp100929_c3_seq2,comp100929_c3_seq3,comp100929_c3_seq4	675.54	624.09	97.85	9.53	6.83
comp100930_c1	comp100930_c1_seq1	504	452.58	3	0.4	0.29
comp100930_c5	comp100930_c5_seq1,comp100930_c5_seq3,comp100930_c5_seq4,comp100930_c5_seq5	972.09	920.64	47	3.1	2.22
comp100931_c0	comp100931_c0_seq1,comp100931_c0_seq2,comp100931_c0_seq3,comp100931_c0_seq4,comp100931_c0_seq5	4859.66	4808.21	2964	37.19	26.65
comp100932_c1	comp100932_c1_seq2	1422	1370.54	102	4.5	3.23
comp100932_c2	comp100932_c2_seq1	851	799.54	32	2.43	1.74
comp100932_c4	comp100932_c4_seq2,comp100932_c4_seq3	893.12	841.67	49	3.53	2.53
comp100932_c5	comp100932_c5_seq1,comp100932_c5_seq2,comp100932_c5_seq4,comp100932_c5_seq5	1463.67	1412.22	220.83	9.46	6.78
comp100932_c6	comp100932_c6_seq1,comp100932_c6_seq2	847.79	796.33	41	3.12	2.24
comp100933_c0	comp100933_c0_seq1	1191	1139.54	4	0.21	0.15
comp100934_c0	comp100934_c0_seq1,comp100934_c0_seq2,comp100934_c0_seq3,comp100934_c0_seq4,comp100934_c0_seq5	1799.65	1748.2	283.3	9.8	7.02
comp100935_c0	comp100935_c0_seq3	654	602.55	27	2.73	1.95
comp100935_c3	comp100935_c3_seq1,comp100935_c3_seq4	1737	1685.54	8	0.29	0.21
comp1009356_c0	comp1009356_c0_seq1	756	704.55	3	0.26	0.19
comp100936_c0	comp100936_c0_seq1,comp100936_c0_seq2,comp100936_c0_seq3,comp100936_c0_seq4,comp100936_c0_seq5	2743.28	2691.82	183.84	4.12	2.96
comp100937_c0	comp100937_c0_seq1,comp100937_c0_seq2	705	653.55	17	1.58	1.13
comp100937_c4	comp100937_c4_seq1,comp100937_c4_seq2,comp100937_c4_seq4,comp100937_c4_seq5	1133.39	1081.93	41	2.3	1.65
comp100937_c5	comp100937_c5_seq3,comp100937_c5_seq4,comp100937_c5_seq5	1024.32	972.87	79	4.92	3.53
comp100938_c0	comp100938_c0_seq1,comp100938_c0_seq2,comp100938_c0_seq4,comp100938_c0_seq5	919.6	868.14	5	0.35	0.25
comp100939_c0	comp100939_c0_seq1,comp100939_c0_seq2,comp100939_c0_seq3,comp100939_c0_seq4,comp100939_c0_seq5	1865.66	1814.2	393	13.1	9.38
comp1009396_c0	comp1009396_c0_seq1	549	497.57	3	0.37	0.26
comp10094_c0	comp10094_c0_seq1	612	560.56	18	1.95	1.4
comp100940_c0	comp100940_c0_seq1	2671	2619.54	589.79	13.6	9.74
comp100941_c0	comp100941_c0_seq1,comp100941_c0_seq2,comp100941_c0_seq3	3346.62	3295.16	296	5.42	3.89
comp100941_c1	comp100941_c1_seq2	536	484.57	16	2.01	1.44
comp100942_c0	comp100942_c0_seq1	795	743.54	4	0.33	0.23
comp100943_c0	comp100943_c0_seq1,comp100943_c0_seq2,comp100943_c0_seq3,comp100943_c0_seq4,comp100943_c0_seq5	1251.86	1200.4	132.96	6.71	4.81
comp100943_c1	comp100943_c1_seq1	756	704.55	102	8.79	6.3
comp100943_c2	comp100943_c2_seq1,comp100943_c2_seq2,comp100943_c2_seq3,comp100943_c2_seq4	1342.94	1291.48	164	7.69	5.51
comp100944_c0	comp100944_c0_seq1,comp100944_c0_seq2,comp100944_c0_seq3	1273.52	1222.07	238	11.79	8.45
comp100945_c1	comp100945_c1_seq1	2344	2292.54	1147.96	30.25	21.68
comp100946_c0	comp100946_c0_seq1	2319	2267.54	23	0.61	0.44
comp100947_c0	comp100947_c0_seq3,comp100947_c0_seq4,comp100947_c0_seq5	1018.58	967.13	29	1.82	1.3
comp100947_c1	comp100947_c1_seq2,comp100947_c1_seq3,comp100947_c1_seq4,comp100947_c1_seq5	1219.85	1168.4	122	6.32	4.53
comp100947_c6	comp100947_c6_seq1,comp100947_c6_seq2	757.28	705.82	49	4.22	3.02
comp100948_c0	comp100948_c0_seq1,comp100948_c0_seq2	1624.93	1573.48	41	1.58	1.13
comp100950_c0	comp100950_c0_seq1	713	661.55	20	1.84	1.32
comp100950_c1	comp100950_c1_seq1	898	846.54	17	1.22	0.87
comp100951_c0	comp100951_c0_seq1,comp100951_c0_seq2	2067.9	2016.44	354	10.61	7.6
comp100952_c0	comp100952_c0_seq1,comp100952_c0_seq2,comp100952_c0_seq3,comp100952_c0_seq4,comp100952_c0_seq5	1142.81	1091.36	83.05	4.61	3.3
comp100953_c0	comp100953_c0_seq1,comp100953_c0_seq2,comp100953_c0_seq3	688.15	636.7	25.96	2.48	1.78
comp100954_c1	comp100954_c1_seq1,comp100954_c1_seq2,comp100954_c1_seq3,comp100954_c1_seq4,comp100954_c1_seq5	973.05	921.59	15	0.99	0.71
comp100955_c0	comp100955_c0_seq1,comp100955_c0_seq2,comp100955_c0_seq3,comp100955_c0_seq4,comp100955_c0_seq5	1273.17	1221.71	46	2.28	1.63
comp100956_c1	comp100956_c1_seq3,comp100956_c1_seq4	686.34	634.89	40.47	3.88	2.78
comp100957_c0	comp100957_c0_seq1,comp100957_c0_seq2,comp100957_c0_seq3,comp100957_c0_seq4,comp100957_c0_seq5	1136.17	1084.71	68	3.8	2.72
comp100957_c2	comp100957_c2_seq1,comp100957_c2_seq2,comp100957_c2_seq3,comp100957_c2_seq4	1907.92	1856.46	587.22	19.12	13.7
comp100957_c5	comp100957_c5_seq1	1344	1292.54	4	0.19	0.13
comp100958_c0	comp100958_c0_seq1,comp100958_c0_seq2,comp100958_c0_seq4,comp100958_c0_seq5	1726.15	1674.69	135.43	4.89	3.5
comp100959_c0	comp100959_c0_seq1	2357	2305.54	798.09	20.91	14.99
comp10096_c0	comp10096_c0_seq1	1020	968.54	5	0.31	0.22
comp100960_c0	comp100960_c0_seq1,comp100960_c0_seq2,comp100960_c0_seq3,comp100960_c0_seq4,comp100960_c0_seq5	1335	1283.54	68	3.21	2.3
comp100961_c0	comp100961_c0_seq1,comp100961_c0_seq2,comp100961_c0_seq3,comp100961_c0_seq4,comp100961_c0_seq5	878.28	826.82	32	2.35	1.68
comp100962_c0	comp100962_c0_seq1,comp100962_c0_seq2	1496.23	1444.78	129	5.4	3.87
comp100963_c0	comp100963_c0_seq1,comp100963_c0_seq2,comp100963_c0_seq3,comp100963_c0_seq4,comp100963_c0_seq5	722.54	671.1	128.98	11.68	8.37
comp100964_c0	comp100964_c0_seq1,comp100964_c0_seq3,comp100964_c0_seq4,comp100964_c0_seq5	890.74	839.28	27	1.95	1.4
comp100965_c0	comp100965_c0_seq1,comp100965_c0_seq2,comp100965_c0_seq3,comp100965_c0_seq4,comp100965_c0_seq5	575.4	523.97	73	8.49	6.08
comp100966_c1	comp100966_c1_seq1	626	574.56	61	6.46	4.63
comp100966_c2	comp100966_c2_seq1,comp100966_c2_seq2,comp100966_c2_seq3,comp100966_c2_seq4,comp100966_c2_seq5	3589	3537.54	117	2	1.43
comp100966_c3	comp100966_c3_seq1,comp100966_c3_seq2,comp100966_c3_seq3,comp100966_c3_seq4,comp100966_c3_seq5	3967.71	3916.25	4687.31	72.23	51.76
comp100967_c0	comp100967_c0_seq1,comp100967_c0_seq2,comp100967_c0_seq3,comp100967_c0_seq4	2275.34	2223.88	563.06	15.3	10.96
comp100968_c0	comp100968_c0_seq1,comp100968_c0_seq2,comp100968_c0_seq3,comp100968_c0_seq4,comp100968_c0_seq5	2929.14	2877.68	3160.64	66.32	47.52
comp100968_c1	comp100968_c1_seq1	1544	1492.54	91	3.69	2.64
comp100968_c2	comp100968_c2_seq1,comp100968_c2_seq2,comp100968_c2_seq3,comp100968_c2_seq4,comp100968_c2_seq5	2676.23	2624.77	4492.79	103.37	74.08
comp100968_c3	comp100968_c3_seq1	1261	1209.54	71.88	3.6	2.58
comp100969_c0	comp100969_c0_seq1	2148	2096.54	157	4.53	3.24
comp100970_c0	comp100970_c0_seq2,comp100970_c0_seq3,comp100970_c0_seq4,comp100970_c0_seq5	1462.51	1411.05	206	8.83	6.33
comp100971_c0	comp100971_c0_seq1,comp100971_c0_seq2,comp100971_c0_seq3,comp100971_c0_seq4,comp100971_c0_seq5	1192.57	1141.12	112	5.94	4.26
comp100971_c4	comp100971_c4_seq1	1171	1119.54	28	1.51	1.09
comp100972_c0	comp100972_c0_seq1	846	794.54	72	5.5	3.94
comp100972_c1	comp100972_c1_seq1,comp100972_c1_seq3	1449.49	1398.03	14	0.61	0.43
comp100972_c2	comp100972_c2_seq1	654	602.55	26	2.62	1.88
comp100972_c3	comp100972_c3_seq1	519	467.58	7	0.91	0.65
comp100972_c5	comp100972_c5_seq1,comp100972_c5_seq2	535.19	483.76	45	5.67	4.06
comp100972_c6	comp100972_c6_seq1,comp100972_c6_seq2,comp100972_c6_seq3,comp100972_c6_seq4,comp100972_c6_seq5	1769.16	1717.7	253	8.91	6.38
comp100972_c7	comp100972_c7_seq1	912	860.54	44	3.1	2.22
comp100973_c1	comp100973_c1_seq1,comp100973_c1_seq2,comp100973_c1_seq3,comp100973_c1_seq4,comp100973_c1_seq5	1346.46	1295	35	1.64	1.17
comp100973_c2	comp100973_c2_seq1,comp100973_c2_seq2	1442.33	1390.87	13	0.57	0.41
comp100973_c3	comp100973_c3_seq1,comp100973_c3_seq2,comp100973_c3_seq4,comp100973_c3_seq5	2301.61	2250.16	939.13	25.21	18.07
comp100974_c0	comp100974_c0_seq1,comp100974_c0_seq2,comp100974_c0_seq3,comp100974_c0_seq4	1435.08	1383.62	14	0.61	0.44
comp100975_c0	comp100975_c0_seq1,comp100975_c0_seq2,comp100975_c0_seq3,comp100975_c0_seq4,comp100975_c0_seq5	1195.17	1143.71	448.93	23.77	17.04
comp100976_c0	comp100976_c0_seq1,comp100976_c0_seq2,comp100976_c0_seq3,comp100976_c0_seq4,comp100976_c0_seq5	1332.07	1280.62	37	1.75	1.25
comp100977_c0	comp100977_c0_seq1,comp100977_c0_seq2,comp100977_c0_seq3,comp100977_c0_seq4,comp100977_c0_seq5	781.83	730.38	66	5.49	3.93
comp100977_c1	comp100977_c1_seq1	532	480.57	6	0.76	0.55
comp100978_c1	comp100978_c1_seq1,comp100978_c1_seq2,comp100978_c1_seq3,comp100978_c1_seq4,comp100978_c1_seq5	2131.58	2080.12	161.84	4.7	3.37
comp100978_c2	comp100978_c2_seq1,comp100978_c2_seq2	1087.59	1036.13	77	4.5	3.23
comp100979_c0	comp100979_c0_seq1	2865	2813.54	844.96	18.13	13
comp100980_c0	comp100980_c0_seq1	3343	3291.54	1647.03	30.21	21.65
comp100981_c0	comp100981_c0_seq1	747	695.55	11	0.96	0.69
comp100982_c0	comp100982_c0_seq1,comp100982_c0_seq2,comp100982_c0_seq3,comp100982_c0_seq4	1231	1179.54	39.61	2.03	1.46
comp100983_c0	comp100983_c0_seq1	2079	2027.54	597	17.79	12.75
comp100983_c1	comp100983_c1_seq1,comp100983_c1_seq2,comp100983_c1_seq3,comp100983_c1_seq5	2529.45	2477.99	1598.17	38.95	27.92
comp100983_c2	comp100983_c2_seq1,comp100983_c2_seq2,comp100983_c2_seq3,comp100983_c2_seq4,comp100983_c2_seq5	2459.25	2407.8	217.98	5.47	3.92
comp100983_c3	comp100983_c3_seq1	947	895.54	4	0.27	0.19
comp100983_c4	comp100983_c4_seq1	576	524.57	61	7.08	5.08
comp100984_c1	comp100984_c1_seq1	651	599.55	5	0.51	0.36
comp100984_c2	comp100984_c2_seq1	625	573.56	47	4.99	3.57
comp100984_c3	comp100984_c3_seq1	611	559.56	21	2.28	1.64
comp100984_c5	comp100984_c5_seq2,comp100984_c5_seq4,comp100984_c5_seq5	1529.39	1477.93	139	5.69	4.08
comp100985_c0	comp100985_c0_seq1	1917	1865.54	365	11.83	8.48
comp100986_c2	comp100986_c2_seq1	655	603.55	29	2.92	2.09
comp100986_c3	comp100986_c3_seq1,comp100986_c3_seq4,comp100986_c3_seq5	1572.55	1521.09	155	6.16	4.42
comp100987_c1	comp100987_c1_seq1,comp100987_c1_seq2,comp100987_c1_seq3	1032.84	981.38	121	7.47	5.36
comp100988_c0	comp100988_c0_seq1,comp100988_c0_seq2,comp100988_c0_seq3,comp100988_c0_seq4,comp100988_c0_seq5	6331.28	6279.82	965.05	9.27	6.64
comp100989_c0	comp100989_c0_seq1	7289	7237.54	917.96	7.65	5.48
comp1009899_c0	comp1009899_c0_seq1	522	470.58	1	0.13	0.09
comp100990_c0	comp100990_c0_seq1,comp100990_c0_seq2	1539	1487.54	120	4.88	3.5
comp100991_c0	comp100991_c0_seq1	929	877.54	1	0.07	0.05
comp100991_c1	comp100991_c1_seq1	1312	1260.54	21	1.01	0.72
comp100991_c2	comp100991_c2_seq1	1833	1781.54	53	1.8	1.29
comp100992_c1	comp100992_c1_seq1,comp100992_c1_seq2	829.33	777.88	12	0.94	0.67
comp100992_c2	comp100992_c2_seq1,comp100992_c2_seq2,comp100992_c2_seq3,comp100992_c2_seq4,comp100992_c2_seq5	1461.18	1409.72	118.24	5.08	3.64
comp100993_c0	comp100993_c0_seq1,comp100993_c0_seq2,comp100993_c0_seq3,comp100993_c0_seq4,comp100993_c0_seq5	3051.68	3000.23	1434.99	28.88	20.69
comp100994_c2	comp100994_c2_seq1,comp100994_c2_seq2,comp100994_c2_seq3,comp100994_c2_seq4,comp100994_c2_seq5	1110.04	1058.58	388	22.21	15.91
comp100994_c3	comp100994_c3_seq1	1901	1849.54	30	0.98	0.7
comp100995_c0	comp100995_c0_seq1,comp100995_c0_seq2,comp100995_c0_seq3,comp100995_c0_seq4,comp100995_c0_seq5	1372.14	1320.68	201.08	9.22	6.6
comp100996_c0	comp100996_c0_seq1	2060	2008.54	10	0.3	0.22
comp100996_c1	comp100996_c1_seq1	947	895.54	8	0.54	0.39
comp100996_c2	comp100996_c2_seq1,comp100996_c2_seq2	1626.39	1574.93	31	1.19	0.85
comp100997_c1	comp100997_c1_seq1,comp100997_c1_seq2,comp100997_c1_seq3,comp100997_c1_seq4	1098.43	1046.98	36	2.08	1.49
comp100998_c0	comp100998_c0_seq1,comp100998_c0_seq2,comp100998_c0_seq4,comp100998_c0_seq5	1481.51	1430.05	139.87	5.92	4.24
comp100999_c0	comp100999_c0_seq1,comp100999_c0_seq2	1481.62	1430.16	46	1.95	1.39
comp10100_c0	comp10100_c0_seq1	600	548.56	2	0.22	0.16
comp101000_c0	comp101000_c0_seq1,comp101000_c0_seq2,comp101000_c0_seq3	1558.66	1507.2	389.04	15.61	11.19
comp101001_c0	comp101001_c0_seq1	1094	1042.54	517.95	30.1	21.57
comp101001_c1	comp101001_c1_seq1,comp101001_c1_seq2,comp101001_c1_seq3,comp101001_c1_seq4,comp101001_c1_seq5	1927.54	1876.08	616	19.85	14.22
comp101002_c0	comp101002_c0_seq1,comp101002_c0_seq2,comp101002_c0_seq3,comp101002_c0_seq4,comp101002_c0_seq5	3158.52	3107.06	1472.12	28.6	20.5
comp101003_c0	comp101003_c0_seq1,comp101003_c0_seq2,comp101003_c0_seq3,comp101003_c0_seq4,comp101003_c0_seq5	1567.6	1516.14	1954.57	77.98	55.88
comp101003_c1	comp101003_c1_seq1,comp101003_c1_seq2	975.48	924.03	65.21	4.28	3.07
comp101003_c2	comp101003_c2_seq1	1247	1195.54	1	0.05	0.04
comp101003_c3	comp101003_c3_seq1,comp101003_c3_seq2,comp101003_c3_seq3	1290.07	1238.61	115.26	5.63	4.04
comp101004_c0	comp101004_c0_seq1,comp101004_c0_seq2,comp101004_c0_seq3,comp101004_c0_seq4,comp101004_c0_seq5	1824.24	1772.78	123	4.19	3.01
comp101005_c3	comp101005_c3_seq1	507	455.58	5	0.67	0.48
comp101005_c4	comp101005_c4_seq1,comp101005_c4_seq2,comp101005_c4_seq3,comp101005_c4_seq4,comp101005_c4_seq5	1344.93	1293.47	105.07	4.92	3.52
comp101006_c0	comp101006_c0_seq1,comp101006_c0_seq2,comp101006_c0_seq3,comp101006_c0_seq4,comp101006_c0_seq5	1877.17	1825.71	175.82	5.82	4.17
comp101007_c0	comp101007_c0_seq1,comp101007_c0_seq2,comp101007_c0_seq3,comp101007_c0_seq4,comp101007_c0_seq5	1247.21	1195.75	2173	110.03	78.85
comp101009_c0	comp101009_c0_seq1,comp101009_c0_seq2	1259.21	1207.76	70	3.51	2.51
comp101009_c1	comp101009_c1_seq1,comp101009_c1_seq2,comp101009_c1_seq3,comp101009_c1_seq4,comp101009_c1_seq5	1317.68	1266.23	30	1.43	1.03
comp101010_c0	comp101010_c0_seq1,comp101010_c0_seq2,comp101010_c0_seq3,comp101010_c0_seq4,comp101010_c0_seq5	1842.29	1790.84	7059.68	238.32	170.79
comp101011_c0	comp101011_c0_seq1,comp101011_c0_seq2,comp101011_c0_seq3,comp101011_c0_seq4	1398.39	1346.93	242	10.87	7.79
comp101012_c0	comp101012_c0_seq1,comp101012_c0_seq2,comp101012_c0_seq3	743.12	691.68	11	0.97	0.69
comp101013_c1	comp101013_c1_seq1,comp101013_c1_seq2,comp101013_c1_seq3,comp101013_c1_seq4,comp101013_c1_seq5	4090.28	4038.82	8139.48	121.61	87.15
comp101014_c2	comp101014_c2_seq2	2233	2181.54	17	0.47	0.34
comp101015_c0	comp101015_c0_seq1	738	686.55	0	0	0
comp101015_c1	comp101015_c1_seq1	1192	1140.54	0	0	0
comp101015_c2	comp101015_c2_seq1,comp101015_c2_seq2,comp101015_c2_seq3,comp101015_c2_seq4,comp101015_c2_seq5	1633.54	1582.08	494	18.89	13.53
comp101015_c3	comp101015_c3_seq1,comp101015_c3_seq2,comp101015_c3_seq3	649	597.55	2	0.2	0.15
comp101015_c4	comp101015_c4_seq1	983	931.54	0	0	0
comp101016_c2	comp101016_c2_seq2,comp101016_c2_seq3,comp101016_c2_seq4	785.88	734.43	71	5.87	4.21
comp101016_c3	comp101016_c3_seq1	718	666.55	13	1.19	0.85
comp101016_c4	comp101016_c4_seq1,comp101016_c4_seq2,comp101016_c4_seq3,comp101016_c4_seq4	811.23	759.78	60.01	4.8	3.44
comp101017_c0	comp101017_c0_seq1	1120	1068.54	268	15.2	10.89
comp101017_c1	comp101017_c1_seq1,comp101017_c1_seq2,comp101017_c1_seq3,comp101017_c1_seq4	1179.11	1127.65	1007.44	54.11	38.78
comp101019_c0	comp101019_c0_seq1,comp101019_c0_seq2	1600	1548.54	72	2.81	2.02
comp101020_c0	comp101020_c0_seq1	1601	1549.54	17	0.66	0.48
comp101020_c1	comp101020_c1_seq1	864	812.54	9	0.67	0.48
comp101021_c0	comp101021_c0_seq2,comp101021_c0_seq3	914	862.54	166	11.67	8.37
comp101022_c0	comp101022_c0_seq1,comp101022_c0_seq2,comp101022_c0_seq3,comp101022_c0_seq4	3479.27	3427.82	225	3.96	2.84
comp101023_c0	comp101023_c0_seq1,comp101023_c0_seq2,comp101023_c0_seq5	1177.89	1126.43	99	5.32	3.81
comp101023_c1	comp101023_c1_seq1	1456	1404.54	152.88	6.59	4.72
comp101023_c2	comp101023_c2_seq1,comp101023_c2_seq2,comp101023_c2_seq3	892.15	840.7	40	2.89	2.07
comp101023_c5	comp101023_c5_seq1,comp101023_c5_seq2,comp101023_c5_seq3	1503	1451.54	31	1.29	0.93
comp101024_c0	comp101024_c0_seq2,comp101024_c0_seq3,comp101024_c0_seq4	849.11	797.65	38	2.89	2.07
comp101025_c0	comp101025_c0_seq1,comp101025_c0_seq2,comp101025_c0_seq3,comp101025_c0_seq4,comp101025_c0_seq5	1913.08	1861.62	409	13.28	9.52
comp101025_c1	comp101025_c1_seq1,comp101025_c1_seq2,comp101025_c1_seq3,comp101025_c1_seq5	2829.82	2778.37	750.98	16.32	11.7
comp101026_c0	comp101026_c0_seq1,comp101026_c0_seq2,comp101026_c0_seq3,comp101026_c0_seq4,comp101026_c0_seq5	977.13	925.67	59	3.86	2.77
comp101027_c1	comp101027_c1_seq1,comp101027_c1_seq2,comp101027_c1_seq3,comp101027_c1_seq4,comp101027_c1_seq5	1841.98	1790.53	327	11.04	7.91
comp101028_c0	comp101028_c0_seq1,comp101028_c0_seq2,comp101028_c0_seq3,comp101028_c0_seq4,comp101028_c0_seq5	2867.33	2815.87	3716.26	79.69	57.11
comp101028_c2	comp101028_c2_seq1,comp101028_c2_seq2	1763.85	1712.4	999.61	35.3	25.29
comp101028_c3	comp101028_c3_seq2,comp101028_c3_seq3,comp101028_c3_seq4,comp101028_c3_seq5	1165.91	1114.45	2047.45	111.28	79.75
comp101029_c0	comp101029_c0_seq1,comp101029_c0_seq2,comp101029_c0_seq3,comp101029_c0_seq4,comp101029_c0_seq5	1562.38	1510.92	55.03	2.2	1.58
comp101030_c1	comp101030_c1_seq1,comp101030_c1_seq2,comp101030_c1_seq3,comp101030_c1_seq4,comp101030_c1_seq5	2096.3	2044.84	187.99	5.56	3.98
comp101030_c2	comp101030_c2_seq1	1164	1112.54	22	1.2	0.86
comp101031_c0	comp101031_c0_seq1	2175	2123.54	276	7.85	5.63
comp101032_c0	comp101032_c0_seq1	1159	1107.54	75	4.1	2.94
comp101033_c0	comp101033_c0_seq1,comp101033_c0_seq2,comp101033_c0_seq3,comp101033_c0_seq4,comp101033_c0_seq5	2267.83	2216.38	1766.16	48.14	34.5
comp101033_c1	comp101033_c1_seq1,comp101033_c1_seq2	3976.51	3925.05	358.43	5.51	3.95
comp101033_c2	comp101033_c2_seq1	591	539.56	139	15.69	11.24
comp101034_c0	comp101034_c0_seq1,comp101034_c0_seq2,comp101034_c0_seq3,comp101034_c0_seq4	2626.49	2575.03	2245.97	52.68	37.75
comp101035_c1	comp101035_c1_seq1,comp101035_c1_seq2,comp101035_c1_seq3,comp101035_c1_seq4,comp101035_c1_seq5	1759.61	1708.15	1253.37	44.37	31.79
comp101036_c0	comp101036_c0_seq1,comp101036_c0_seq2,comp101036_c0_seq3	4587.86	4536.4	496	6.6	4.73
comp101037_c0	comp101037_c0_seq1,comp101037_c0_seq2,comp101037_c0_seq3,comp101037_c0_seq4,comp101037_c0_seq5	1487.74	1436.29	96.91	4.08	2.93
comp101038_c0	comp101038_c0_seq1	627	575.56	15	1.59	1.14
comp101038_c2	comp101038_c2_seq1,comp101038_c2_seq2,comp101038_c2_seq3,comp101038_c2_seq4,comp101038_c2_seq5	803.05	751.61	93	7.51	5.38
comp101039_c0	comp101039_c0_seq1,comp101039_c0_seq2,comp101039_c0_seq3,comp101039_c0_seq5	786.32	734.88	66	5.45	3.91
comp101039_c2	comp101039_c2_seq2,comp101039_c2_seq3	731.36	679.91	66	5.9	4.23
comp10104_c0	comp10104_c0_seq1	529	477.58	1	0.13	0.09
comp101040_c1	comp101040_c1_seq1,comp101040_c1_seq2	1168.16	1116.7	37	2.01	1.44
comp101041_c1	comp101041_c1_seq1,comp101041_c1_seq2,comp101041_c1_seq3,comp101041_c1_seq4,comp101041_c1_seq5	3092.41	3040.95	1003.01	19.91	14.27
comp101042_c0	comp101042_c0_seq1	1695	1643.54	28	1.03	0.74
comp101042_c1	comp101042_c1_seq1,comp101042_c1_seq2,comp101042_c1_seq3,comp101042_c1_seq4,comp101042_c1_seq5	1192.51	1141.06	90.02	4.78	3.42
comp101042_c2	comp101042_c2_seq3,comp101042_c2_seq5	2037.29	1985.84	46	1.4	1
comp101043_c0	comp101043_c0_seq1	579	527.56	24	2.77	1.99
comp101043_c1	comp101043_c1_seq1,comp101043_c1_seq2,comp101043_c1_seq3,comp101043_c1_seq4,comp101043_c1_seq5	1573.21	1521.75	1457.1	57.92	41.51
comp101044_c0	comp101044_c0_seq1,comp101044_c0_seq2,comp101044_c0_seq3,comp101044_c0_seq4,comp101044_c0_seq5	2316.71	2265.26	594.93	15.87	11.37
comp101044_c2	comp101044_c2_seq1	1344	1292.54	665	31.14	22.32
comp101044_c3	comp101044_c3_seq1	1245	1193.54	975.49	49.49	35.47
comp101045_c0	comp101045_c0_seq1,comp101045_c0_seq2,comp101045_c0_seq3,comp101045_c0_seq4,comp101045_c0_seq5	1572.87	1521.42	44.62	1.77	1.27
comp101046_c2	comp101046_c2_seq1,comp101046_c2_seq2,comp101046_c2_seq3,comp101046_c2_seq4,comp101046_c2_seq5	1527.12	1475.67	1026.02	42.06	30.14
comp101046_c4	comp101046_c4_seq1	1969	1917.54	56	1.77	1.26
comp101047_c0	comp101047_c0_seq1,comp101047_c0_seq2,comp101047_c0_seq3,comp101047_c0_seq4,comp101047_c0_seq5	1086.82	1035.36	154.94	9.07	6.5
comp101048_c0	comp101048_c0_seq1,comp101048_c0_seq2,comp101048_c0_seq3,comp101048_c0_seq4	1738.04	1686.58	369.01	13.23	9.48
comp101049_c1	comp101049_c1_seq1,comp101049_c1_seq3,comp101049_c1_seq5	809.53	758.07	83.43	6.68	4.79
comp101050_c0	comp101050_c0_seq1	834	782.54	2	0.16	0.11
comp101050_c1	comp101050_c1_seq1	547	495.57	3	0.37	0.26
comp101050_c2	comp101050_c2_seq1,comp101050_c2_seq2,comp101050_c2_seq3,comp101050_c2_seq4,comp101050_c2_seq5	2660.71	2609.25	146	3.38	2.42
comp101051_c1	comp101051_c1_seq1,comp101051_c1_seq4	2229.33	2177.87	13	0.36	0.26
comp101051_c3	comp101051_c3_seq1	536	484.57	94	11.82	8.47
comp101051_c4	comp101051_c4_seq1,comp101051_c4_seq2	1340.21	1288.76	563.78	26.48	18.98
comp101052_c0	comp101052_c0_seq1,comp101052_c0_seq2	3022.7	2971.24	4090.58	83.12	59.57
comp101053_c0	comp101053_c0_seq1,comp101053_c0_seq3	1572	1520.54	24.35	0.97	0.69
comp101054_c0	comp101054_c0_seq1,comp101054_c0_seq2,comp101054_c0_seq3,comp101054_c0_seq4,comp101054_c0_seq5	1689.94	1638.49	466.64	17.22	12.34
comp101055_c2	comp101055_c2_seq1	1064	1012.54	51	3.05	2.19
comp101055_c3	comp101055_c3_seq1,comp101055_c3_seq2,comp101055_c3_seq3,comp101055_c3_seq4	1162.26	1110.81	73.98	4.03	2.89
comp101056_c0	comp101056_c0_seq1,comp101056_c0_seq2,comp101056_c0_seq3,comp101056_c0_seq4	1202.52	1151.07	331	17.42	12.48
comp101058_c0	comp101058_c0_seq1,comp101058_c0_seq2,comp101058_c0_seq4,comp101058_c0_seq5	1360.87	1309.41	149	6.89	4.94
comp101059_c1	comp101059_c1_seq1,comp101059_c1_seq2,comp101059_c1_seq5	715.62	664.17	10	0.92	0.66
comp10106_c0	comp10106_c0_seq1	822	770.54	7	0.55	0.4
comp101060_c0	comp101060_c0_seq1,comp101060_c0_seq2,comp101060_c0_seq3,comp101060_c0_seq4,comp101060_c0_seq5	1789.33	1737.87	2621	91.19	65.35
comp101061_c0	comp101061_c0_seq1,comp101061_c0_seq3,comp101061_c0_seq4,comp101061_c0_seq5	603.34	551.91	52.86	5.83	4.18
comp101062_c0	comp101062_c0_seq1,comp101062_c0_seq2,comp101062_c0_seq3,comp101062_c0_seq4,comp101062_c0_seq5	2569.93	2518.48	1485.98	35.64	25.54
comp101063_c0	comp101063_c0_seq1,comp101063_c0_seq2,comp101063_c0_seq3,comp101063_c0_seq4	594.05	542.62	18	2.02	1.45
comp101064_c0	comp101064_c0_seq1,comp101064_c0_seq2,comp101064_c0_seq3,comp101064_c0_seq4,comp101064_c0_seq5	881.93	830.48	47	3.43	2.46
comp101065_c0	comp101065_c0_seq1,comp101065_c0_seq2,comp101065_c0_seq3,comp101065_c0_seq4,comp101065_c0_seq5	1932.93	1881.48	200	6.43	4.6
comp101066_c0	comp101066_c0_seq1,comp101066_c0_seq2,comp101066_c0_seq3,comp101066_c0_seq4,comp101066_c0_seq5	1287.39	1235.93	240.4	11.78	8.44
comp101067_c0	comp101067_c0_seq1	2874	2822.54	2008.99	42.98	30.8
comp101068_c0	comp101068_c0_seq1	2359	2307.54	126	3.3	2.36
comp101069_c0	comp101069_c0_seq1,comp101069_c0_seq2,comp101069_c0_seq3,comp101069_c0_seq4	2804.54	2753.08	221	4.85	3.47
comp101070_c0	comp101070_c0_seq1,comp101070_c0_seq2,comp101070_c0_seq4,comp101070_c0_seq5	1536.1	1484.64	126.52	5.16	3.69
comp101071_c0	comp101071_c0_seq1,comp101071_c0_seq2	3291.15	3239.7	1818	33.88	24.28
comp101072_c0	comp101072_c0_seq2,comp101072_c0_seq4,comp101072_c0_seq5	715.88	664.44	13	1.19	0.85
comp101072_c1	comp101072_c1_seq1	524	472.58	6	0.77	0.55
comp101072_c2	comp101072_c2_seq1,comp101072_c2_seq2	2294	2242.54	1	0.03	0.02
comp101072_c4	comp101072_c4_seq1	577	525.57	3	0.35	0.25
comp101072_c5	comp101072_c5_seq1,comp101072_c5_seq2,comp101072_c5_seq3,comp101072_c5_seq4,comp101072_c5_seq5	3067.07	3015.62	141.94	2.84	2.04
comp101073_c0	comp101073_c0_seq1,comp101073_c0_seq2,comp101073_c0_seq3,comp101073_c0_seq4	2241.49	2190.03	136	3.75	2.69
comp101074_c0	comp101074_c0_seq1	1828	1776.54	105	3.57	2.56
comp101075_c0	comp101075_c0_seq1,comp101075_c0_seq2,comp101075_c0_seq3,comp101075_c0_seq5	765.78	714.33	111.53	9.48	6.8
comp101076_c0	comp101076_c0_seq1	604	552.56	1	0.11	0.08
comp101076_c1	comp101076_c1_seq1,comp101076_c1_seq2,comp101076_c1_seq3,comp101076_c1_seq4,comp101076_c1_seq5	891.05	839.59	58	4.19	3
comp101077_c0	comp101077_c0_seq1	1095	1043.54	17	0.99	0.71
comp101078_c2	comp101078_c2_seq1,comp101078_c2_seq2,comp101078_c2_seq3,comp101078_c2_seq4	2480.77	2429.31	635.43	15.8	11.32
comp101078_c3	comp101078_c3_seq1,comp101078_c3_seq2,comp101078_c3_seq3,comp101078_c3_seq4,comp101078_c3_seq5	2335.85	2284.4	395	10.45	7.49
comp101079_c1	comp101079_c1_seq1	524	472.58	10	1.29	0.92
comp101079_c2	comp101079_c2_seq1,comp101079_c2_seq2,comp101079_c2_seq3,comp101079_c2_seq5	1566.07	1514.62	148.75	5.94	4.26
comp101080_c0	comp101080_c0_seq1,comp101080_c0_seq2,comp101080_c0_seq3,comp101080_c0_seq4,comp101080_c0_seq5	1199.87	1148.42	146	7.7	5.52
comp101081_c0	comp101081_c0_seq1,comp101081_c0_seq2,comp101081_c0_seq3,comp101081_c0_seq4,comp101081_c0_seq5	2311.61	2260.15	7827.62	209.23	149.94
comp101082_c0	comp101082_c0_seq1,comp101082_c0_seq2,comp101082_c0_seq3,comp101082_c0_seq4,comp101082_c0_seq5	1280.94	1229.48	159.99	7.88	5.65
comp101083_c0	comp101083_c0_seq1,comp101083_c0_seq2,comp101083_c0_seq3,comp101083_c0_seq4,comp101083_c0_seq5	1609.53	1558.07	449.69	17.46	12.51
comp101084_c0	comp101084_c0_seq2,comp101084_c0_seq3,comp101084_c0_seq4	572.75	521.32	13	1.52	1.09
comp101085_c0	comp101085_c0_seq1,comp101085_c0_seq2	2582.27	2530.81	1033	24.65	17.67
comp101085_c1	comp101085_c1_seq1,comp101085_c1_seq2,comp101085_c1_seq3,comp101085_c1_seq4,comp101085_c1_seq5	1216.7	1165.25	1366.52	71.01	50.89
comp101086_c1	comp101086_c1_seq1,comp101086_c1_seq2,comp101086_c1_seq3,comp101086_c1_seq4,comp101086_c1_seq5	1108.66	1057.21	368.98	21.15	15.15
comp101087_c1	comp101087_c1_seq1	901	849.54	13	0.93	0.67
comp101087_c2	comp101087_c2_seq1	1743	1691.54	934.6	33.41	23.94
comp101087_c3	comp101087_c3_seq1,comp101087_c3_seq2,comp101087_c3_seq3,comp101087_c3_seq4,comp101087_c3_seq5	1718.35	1666.89	6601.28	239.47	171.61
comp101087_c4	comp101087_c4_seq1,comp101087_c4_seq2,comp101087_c4_seq3,comp101087_c4_seq4,comp101087_c4_seq5	3211.61	3160.15	407.24	7.78	5.57
comp101088_c0	comp101088_c0_seq1	1687	1635.54	52	1.92	1.38
comp101089_c1	comp101089_c1_seq3,comp101089_c1_seq4,comp101089_c1_seq5	960.24	908.79	73	4.87	3.49
comp101089_c2	comp101089_c2_seq1	514	462.58	0	0	0
comp101089_c4	comp101089_c4_seq1	552	500.57	1	0.12	0.09
comp101089_c5	comp101089_c5_seq1,comp101089_c5_seq2,comp101089_c5_seq3,comp101089_c5_seq4,comp101089_c5_seq5	1483.82	1432.36	1977.8	83.54	59.87
comp101090_c0	comp101090_c0_seq1	1332	1280.54	29	1.37	0.98
comp101091_c0	comp101091_c0_seq1,comp101091_c0_seq2,comp101091_c0_seq3,comp101091_c0_seq4,comp101091_c0_seq5	1163.17	1111.71	550.77	30.01	21.51
comp101092_c0	comp101092_c0_seq1,comp101092_c0_seq2,comp101092_c0_seq3,comp101092_c0_seq4,comp101092_c0_seq5	3964	3912.55	128	1.97	1.41
comp101093_c0	comp101093_c0_seq1,comp101093_c0_seq2,comp101093_c0_seq3,comp101093_c0_seq4,comp101093_c0_seq5	1592.11	1540.65	2493.15	97.88	70.15
comp101093_c1	comp101093_c1_seq1	1433	1381.54	6131.62	268.57	192.47
comp101094_c0	comp101094_c0_seq1	2252	2200.54	767.69	21.08	15.1
comp101095_c0	comp101095_c0_seq1,comp101095_c0_seq2,comp101095_c0_seq4,comp101095_c0_seq5	1732.93	1681.47	372.53	13.4	9.6
comp101097_c1	comp101097_c1_seq1,comp101097_c1_seq2,comp101097_c1_seq3,comp101097_c1_seq4,comp101097_c1_seq5	999.75	948.29	107	6.84	4.9
comp101098_c0	comp101098_c0_seq1,comp101098_c0_seq2,comp101098_c0_seq3,comp101098_c0_seq4,comp101098_c0_seq5	1974.54	1923.08	773	24.29	17.41
comp101099_c0	comp101099_c0_seq1,comp101099_c0_seq3,comp101099_c0_seq4,comp101099_c0_seq5	2101.47	2050.01	119	3.51	2.51
comp101100_c0	comp101100_c0_seq1,comp101100_c0_seq3,comp101100_c0_seq4,comp101100_c0_seq5	2139.28	2087.82	210.43	6.09	4.36
comp101101_c0	comp101101_c0_seq1,comp101101_c0_seq2,comp101101_c0_seq3,comp101101_c0_seq4,comp101101_c0_seq5	3512	3460.54	121	2.11	1.51
comp101102_c0	comp101102_c0_seq1,comp101102_c0_seq2	2097.4	2045.94	124.01	3.66	2.62
comp101103_c2	comp101103_c2_seq1	773	721.54	12	1.01	0.72
comp101103_c3	comp101103_c3_seq1,comp101103_c3_seq2,comp101103_c3_seq3,comp101103_c3_seq4,comp101103_c3_seq5	537.9	486.48	22	2.76	1.98
comp101103_c4	comp101103_c4_seq1,comp101103_c4_seq2	738.5	687.05	0	0	0
comp101104_c0	comp101104_c0_seq1	1231	1179.54	628	32.24	23.1
comp101104_c1	comp101104_c1_seq1,comp101104_c1_seq2,comp101104_c1_seq3,comp101104_c1_seq4	1296.86	1245.4	1776.12	86.34	61.87
comp101105_c0	comp101105_c0_seq1,comp101105_c0_seq2,comp101105_c0_seq3,comp101105_c0_seq4,comp101105_c0_seq5	1117.33	1065.87	81	4.6	3.3
comp101106_c1	comp101106_c1_seq1,comp101106_c1_seq2,comp101106_c1_seq3	2226.66	2175.21	31	0.86	0.62
comp101106_c3	comp101106_c3_seq1	1069	1017.54	2	0.12	0.09
comp101107_c0	comp101107_c0_seq1,comp101107_c0_seq2,comp101107_c0_seq4,comp101107_c0_seq5	810.53	759.08	71	5.68	4.07
comp101108_c0	comp101108_c0_seq2,comp101108_c0_seq3,comp101108_c0_seq4	1968.83	1917.37	260	8.2	5.87
comp101109_c0	comp101109_c0_seq1	3909	3857.54	18	0.28	0.2
comp101110_c0	comp101110_c0_seq1	1279	1227.54	36	1.78	1.27
comp101110_c2	comp101110_c2_seq1,comp101110_c2_seq2,comp101110_c2_seq3,comp101110_c2_seq4,comp101110_c2_seq5	3232.79	3181.33	1753.65	33.28	23.85
comp101111_c0	comp101111_c0_seq1	1119	1067.54	67	3.8	2.72
comp101111_c1	comp101111_c1_seq1,comp101111_c1_seq3,comp101111_c1_seq4,comp101111_c1_seq5	921.15	869.69	16	1.12	0.8
comp101112_c0	comp101112_c0_seq1,comp101112_c0_seq2,comp101112_c0_seq3,comp101112_c0_seq4,comp101112_c0_seq5	1901.71	1850.25	132	4.31	3.09
comp101113_c0	comp101113_c0_seq1,comp101113_c0_seq3,comp101113_c0_seq4	988.51	937.05	103	6.66	4.78
comp101114_c0	comp101114_c0_seq3,comp101114_c0_seq4,comp101114_c0_seq5	1000.58	949.13	30	1.92	1.37
comp101114_c1	comp101114_c1_seq1	643	591.56	20	2.06	1.47
comp101115_c0	comp101115_c0_seq1,comp101115_c0_seq2,comp101115_c0_seq3,comp101115_c0_seq4	1252.07	1200.61	157.91	7.96	5.71
comp101116_c1	comp101116_c1_seq1,comp101116_c1_seq2,comp101116_c1_seq3,comp101116_c1_seq4	2031.84	1980.38	272	8.3	5.95
comp101117_c1	comp101117_c1_seq1,comp101117_c1_seq2,comp101117_c1_seq3	847.94	796.49	20	1.52	1.09
comp101118_c0	comp101118_c0_seq1,comp101118_c0_seq2,comp101118_c0_seq3,comp101118_c0_seq4,comp101118_c0_seq5	819.27	767.81	40	3.16	2.27
comp101119_c0	comp101119_c0_seq1	617	565.56	66	7.1	5.09
comp101119_c1	comp101119_c1_seq1	1372	1320.54	2	0.09	0.07
comp101119_c2	comp101119_c2_seq1,comp101119_c2_seq2,comp101119_c2_seq3,comp101119_c2_seq4	743.2	691.76	137.17	12.05	8.63
comp101119_c4	comp101119_c4_seq1	797	745.54	75	6.11	4.38
comp101120_c0	comp101120_c0_seq1,comp101120_c0_seq2	1081	1029.54	18	1.06	0.76
comp101121_c0	comp101121_c0_seq1,comp101121_c0_seq2,comp101121_c0_seq3,comp101121_c0_seq4,comp101121_c0_seq5	2846.57	2795.11	235.95	5.1	3.65
comp101122_c1	comp101122_c1_seq1	701	649.55	13	1.22	0.87
comp101122_c3	comp101122_c3_seq1,comp101122_c3_seq3,comp101122_c3_seq5	768.26	716.81	112	9.49	6.8
comp101123_c0	comp101123_c0_seq1,comp101123_c0_seq2,comp101123_c0_seq3,comp101123_c0_seq4,comp101123_c0_seq5	1282.2	1230.75	137	6.74	4.83
comp101123_c1	comp101123_c1_seq1	613	561.56	16	1.73	1.24
comp101123_c2	comp101123_c2_seq1,comp101123_c2_seq2,comp101123_c2_seq3	769.69	718.24	17	1.44	1.03
comp101124_c0	comp101124_c0_seq1,comp101124_c0_seq2,comp101124_c0_seq3,comp101124_c0_seq4,comp101124_c0_seq5	1995.91	1944.45	856.01	26.61	19.07
comp101125_c1	comp101125_c1_seq2,comp101125_c1_seq3,comp101125_c1_seq4,comp101125_c1_seq5	1946.11	1894.65	52	1.66	1.19
comp101125_c2	comp101125_c2_seq1,comp101125_c2_seq2,comp101125_c2_seq3	540.38	488.96	19	2.37	1.7
comp101126_c0	comp101126_c0_seq1,comp101126_c0_seq2,comp101126_c0_seq3,comp101126_c0_seq4,comp101126_c0_seq5	1167.01	1115.55	15	0.81	0.58
comp101127_c0	comp101127_c0_seq1,comp101127_c0_seq2	2000.53	1949.07	26	0.81	0.58
comp101128_c0	comp101128_c0_seq1,comp101128_c0_seq2	3101.14	3049.68	99	1.96	1.4
comp101129_c1	comp101129_c1_seq1,comp101129_c1_seq2,comp101129_c1_seq3,comp101129_c1_seq4,comp101129_c1_seq5	1064.43	1012.97	103.88	6.21	4.45
comp101130_c0	comp101130_c0_seq1,comp101130_c0_seq2,comp101130_c0_seq3,comp101130_c0_seq4,comp101130_c0_seq5	1340.36	1288.91	65	3.05	2.19
comp101131_c0	comp101131_c0_seq1,comp101131_c0_seq2,comp101131_c0_seq4,comp101131_c0_seq5	1886.18	1834.73	780.29	25.71	18.42
comp101132_c0	comp101132_c0_seq1,comp101132_c0_seq2,comp101132_c0_seq3,comp101132_c0_seq4,comp101132_c0_seq5	2137.52	2086.06	1814.87	52.57	37.67
comp101132_c1	comp101132_c1_seq1,comp101132_c1_seq2	1057	1005.54	174.8	10.54	7.55
comp101133_c0	comp101133_c0_seq1,comp101133_c0_seq2	1339.65	1288.19	350	16.45	11.79
comp101134_c0	comp101134_c0_seq1,comp101134_c0_seq4,comp101134_c0_seq5	1416.02	1364.56	127	5.63	4.04
comp101135_c0	comp101135_c0_seq1,comp101135_c0_seq2,comp101135_c0_seq3,comp101135_c0_seq4,comp101135_c0_seq5	1484.53	1433.07	39	1.65	1.18
comp101135_c1	comp101135_c1_seq1,comp101135_c1_seq2,comp101135_c1_seq3,comp101135_c1_seq5	1477.92	1426.47	87.77	3.72	2.67
comp101136_c0	comp101136_c0_seq1,comp101136_c0_seq2,comp101136_c0_seq3,comp101136_c0_seq4,comp101136_c0_seq5	1038.04	986.59	99.85	6.13	4.4
comp101136_c1	comp101136_c1_seq2	667	615.55	0	0	0
comp101137_c0	comp101137_c0_seq2,comp101137_c0_seq3,comp101137_c0_seq4	655.31	603.86	30	3.02	2.17
comp101138_c0	comp101138_c0_seq1,comp101138_c0_seq2,comp101138_c0_seq3,comp101138_c0_seq5	1145.5	1094.05	108.58	6.01	4.31
comp101138_c1	comp101138_c1_seq1,comp101138_c1_seq2	1624.46	1573.01	50.18	1.93	1.38
comp101139_c0	comp101139_c0_seq1	2995	2943.54	870.01	17.85	12.79
comp101140_c0	comp101140_c0_seq1,comp101140_c0_seq2,comp101140_c0_seq3,comp101140_c0_seq4,comp101140_c0_seq5	771.36	719.91	31	2.62	1.87
comp101141_c0	comp101141_c0_seq1,comp101141_c0_seq2,comp101141_c0_seq3,comp101141_c0_seq4,comp101141_c0_seq5	2714.81	2663.35	268	6.08	4.35
comp101142_c0	comp101142_c0_seq1,comp101142_c0_seq2,comp101142_c0_seq3,comp101142_c0_seq4,comp101142_c0_seq5	2526.64	2475.18	255.01	6.22	4.46
comp101143_c0	comp101143_c0_seq1	510	458.58	12	1.6	1.14
comp101143_c1	comp101143_c1_seq1	607	555.56	40	4.38	3.14
comp101143_c2	comp101143_c2_seq1,comp101143_c2_seq2,comp101143_c2_seq3,comp101143_c2_seq4,comp101143_c2_seq5	724.09	672.64	107	9.67	6.93
comp101143_c3	comp101143_c3_seq1	553	501.57	12	1.46	1.04
comp101144_c0	comp101144_c0_seq1,comp101144_c0_seq3,comp101144_c0_seq4,comp101144_c0_seq5	1841.43	1789.98	28	0.95	0.68
comp1011449_c0	comp1011449_c0_seq1	507	455.58	1	0.13	0.1
comp101145_c0	comp101145_c0_seq1,comp101145_c0_seq2,comp101145_c0_seq3,comp101145_c0_seq4,comp101145_c0_seq5	2710.93	2659.47	134	3.04	2.18
comp101145_c2	comp101145_c2_seq2,comp101145_c2_seq5	536.15	484.73	9	1.13	0.81
comp101145_c3	comp101145_c3_seq1	581	529.56	4	0.46	0.33
comp101145_c4	comp101145_c4_seq1,comp101145_c4_seq2,comp101145_c4_seq4,comp101145_c4_seq5	691.8	640.35	52	4.94	3.54
comp101145_c5	comp101145_c5_seq1	536	484.57	73	9.18	6.58
comp101146_c0	comp101146_c0_seq1,comp101146_c0_seq2,comp101146_c0_seq3,comp101146_c0_seq4,comp101146_c0_seq5	3068.49	3017.04	796.56	15.94	11.42
comp101147_c1	comp101147_c1_seq2,comp101147_c1_seq3,comp101147_c1_seq4,comp101147_c1_seq5	2135.08	2083.62	146	4.23	3.03
comp101148_c0	comp101148_c0_seq1,comp101148_c0_seq2,comp101148_c0_seq3	1799.93	1748.47	60.01	2.07	1.49
comp101149_c1	comp101149_c1_seq1,comp101149_c1_seq2,comp101149_c1_seq3,comp101149_c1_seq4,comp101149_c1_seq5	2036.68	1985.22	318.6	9.7	6.95
comp101150_c0	comp101150_c0_seq1	708	656.55	5	0.46	0.33
comp101150_c1	comp101150_c1_seq1,comp101150_c1_seq2,comp101150_c1_seq3,comp101150_c1_seq4,comp101150_c1_seq5	1875.87	1824.42	272.82	9.04	6.48
comp101150_c2	comp101150_c2_seq1	653	601.55	0	0	0
comp101150_c3	comp101150_c3_seq1,comp101150_c3_seq2,comp101150_c3_seq3,comp101150_c3_seq4,comp101150_c3_seq5	2276.65	2225.19	269.06	7.31	5.24
comp101151_c0	comp101151_c0_seq1	957	905.54	5	0.33	0.24
comp101152_c0	comp101152_c0_seq3,comp101152_c0_seq4,comp101152_c0_seq5	733.45	682	10	0.89	0.64
comp101153_c0	comp101153_c0_seq1	502	450.58	73	9.88	7.08
comp101153_c1	comp101153_c1_seq1	2571	2519.54	995.67	23.87	17.1
comp101153_c2	comp101153_c2_seq2,comp101153_c2_seq3,comp101153_c2_seq4,comp101153_c2_seq5	803.34	751.88	27.62	2.23	1.6
comp101153_c3	comp101153_c3_seq1,comp101153_c3_seq3	720.33	668.89	79.98	7.27	5.21
comp101154_c1	comp101154_c1_seq1,comp101154_c1_seq3,comp101154_c1_seq5	1189.49	1138.03	73.01	3.89	2.78
comp101155_c0	comp101155_c0_seq1,comp101155_c0_seq2,comp101155_c0_seq3,comp101155_c0_seq4	2204.59	2153.13	586.15	16.45	11.79
comp101155_c1	comp101155_c1_seq2	1156	1104.54	5	0.27	0.2
comp101156_c0	comp101156_c0_seq1,comp101156_c0_seq2,comp101156_c0_seq3,comp101156_c0_seq4,comp101156_c0_seq5	2757.11	2705.65	1786.99	39.88	28.58
comp101157_c0	comp101157_c0_seq1,comp101157_c0_seq2,comp101157_c0_seq3,comp101157_c0_seq5	1495.43	1443.98	317.39	13.3	9.53
comp101158_c1	comp101158_c1_seq1,comp101158_c1_seq2,comp101158_c1_seq3,comp101158_c1_seq4	2877.41	2825.95	322.6	6.89	4.94
comp101159_c0	comp101159_c0_seq1	552	500.57	9	1.1	0.79
comp101160_c1	comp101160_c1_seq1,comp101160_c1_seq2,comp101160_c1_seq3,comp101160_c1_seq4	1252.2	1200.74	67	3.38	2.42
comp101161_c0	comp101161_c0_seq1	1688	1636.54	118	4.36	3.12
comp101161_c2	comp101161_c2_seq1,comp101161_c2_seq2,comp101161_c2_seq3,comp101161_c2_seq4,comp101161_c2_seq5	2383.97	2332.51	694.96	18	12.9
comp101161_c3	comp101161_c3_seq1	596	544.56	80	8.94	6.41
comp101162_c2	comp101162_c2_seq1,comp101162_c2_seq2,comp101162_c2_seq3	1156.57	1105.12	170.83	9.36	6.71
comp101163_c0	comp101163_c0_seq1	529	477.58	3	0.38	0.27
comp101163_c1	comp101163_c1_seq1,comp101163_c1_seq2,comp101163_c1_seq3,comp101163_c1_seq4,comp101163_c1_seq5	1547.59	1496.13	32	1.29	0.93
comp101164_c0	comp101164_c0_seq2,comp101164_c0_seq3,comp101164_c0_seq4,comp101164_c0_seq5	1088.36	1036.9	244.66	14.3	10.25
comp101164_c1	comp101164_c1_seq1,comp101164_c1_seq3,comp101164_c1_seq4,comp101164_c1_seq5	1339.24	1287.79	59	2.77	1.99
comp101165_c0	comp101165_c0_seq1,comp101165_c0_seq3,comp101165_c0_seq4,comp101165_c0_seq5	694.5	643.05	195.06	18.44	13.21
comp101165_c1	comp101165_c1_seq1,comp101165_c1_seq2,comp101165_c1_seq3,comp101165_c1_seq4,comp101165_c1_seq5	1963.84	1912.38	1424.19	45.01	32.26
comp101166_c0	comp101166_c0_seq1,comp101166_c0_seq2,comp101166_c0_seq3,comp101166_c0_seq4,comp101166_c0_seq5	4315.66	4264.2	180	2.55	1.83
comp101166_c1	comp101166_c1_seq1	1399	1347.54	367.98	16.53	11.84
comp101167_c0	comp101167_c0_seq1,comp101167_c0_seq2,comp101167_c0_seq3,comp101167_c0_seq4	1907.7	1856.24	1348.76	43.92	31.48
comp101168_c0	comp101168_c0_seq1,comp101168_c0_seq3,comp101168_c0_seq4,comp101168_c0_seq5	1032.48	981.03	94	5.81	4.16
comp101169_c0	comp101169_c0_seq1,comp101169_c0_seq2	1836.78	1785.32	119	4.03	2.89
comp101170_c1	comp101170_c1_seq1	1765	1713.54	207	7.3	5.23
comp101170_c3	comp101170_c3_seq1,comp101170_c3_seq2,comp101170_c3_seq3,comp101170_c3_seq4	1276.81	1225.35	67	3.31	2.37
comp101171_c0	comp101171_c0_seq2,comp101171_c0_seq3,comp101171_c0_seq5	578.52	527.09	705.3	81.49	58.4
comp101172_c0	comp101172_c0_seq1,comp101172_c0_seq2,comp101172_c0_seq3,comp101172_c0_seq4	1224.45	1172.99	177	9.14	6.55
comp101173_c0	comp101173_c0_seq1,comp101173_c0_seq2,comp101173_c0_seq3,comp101173_c0_seq4,comp101173_c0_seq5	2181.75	2130.29	216.81	6.15	4.41
comp101174_c0	comp101174_c0_seq1	2233	2181.54	672.98	18.64	13.36
comp101175_c0	comp101175_c0_seq1,comp101175_c0_seq2,comp101175_c0_seq3,comp101175_c0_seq4,comp101175_c0_seq5	1039.75	988.29	507.94	31.15	22.32
comp101176_c0	comp101176_c0_seq1	1475	1423.54	45	1.91	1.37
comp101177_c1	comp101177_c1_seq1,comp101177_c1_seq3,comp101177_c1_seq4	2262.48	2211.02	251.14	6.86	4.92
comp101178_c2	comp101178_c2_seq1,comp101178_c2_seq2,comp101178_c2_seq3	927.24	875.8	19.99	1.38	0.99
comp101179_c0	comp101179_c0_seq1,comp101179_c0_seq2,comp101179_c0_seq3,comp101179_c0_seq4,comp101179_c0_seq5	1668.15	1616.69	1507.5	56.39	40.41
comp10118_c0	comp10118_c0_seq1	543	491.57	2	0.25	0.18
comp101180_c0	comp101180_c0_seq1,comp101180_c0_seq2,comp101180_c0_seq3	2718.36	2666.9	1366.1	30.93	22.17
comp101181_c0	comp101181_c0_seq1	1500	1448.54	1168	48.78	34.96
comp101182_c0	comp101182_c0_seq1,comp101182_c0_seq3,comp101182_c0_seq4,comp101182_c0_seq5	1065.91	1014.45	69	4.12	2.95
comp101183_c0	comp101183_c0_seq1,comp101183_c0_seq2,comp101183_c0_seq3,comp101183_c0_seq4,comp101183_c0_seq5	3402	3350.54	1004.12	18.09	12.96
comp101184_c0	comp101184_c0_seq2,comp101184_c0_seq3,comp101184_c0_seq4,comp101184_c0_seq5	1047.42	995.96	111	6.75	4.84
comp101184_c1	comp101184_c1_seq1,comp101184_c1_seq2,comp101184_c1_seq3,comp101184_c1_seq4,comp101184_c1_seq5	2668.08	2616.62	1025.38	23.67	16.96
comp101185_c0	comp101185_c0_seq1,comp101185_c0_seq3,comp101185_c0_seq4	1703.96	1652.51	134	4.9	3.51
comp101186_c2	comp101186_c2_seq1,comp101186_c2_seq2,comp101186_c2_seq3,comp101186_c2_seq4,comp101186_c2_seq5	2885.9	2834.44	2351.51	50.09	35.9
comp101187_c0	comp101187_c0_seq1,comp101187_c0_seq2,comp101187_c0_seq3,comp101187_c0_seq4,comp101187_c0_seq5	1578.75	1527.29	243.29	9.64	6.9
comp101188_c0	comp101188_c0_seq1	661	609.55	2	0.2	0.14
comp101189_c0	comp101189_c0_seq1	1566	1514.54	52.99	2.12	1.52
comp101190_c0	comp101190_c0_seq1	1159	1107.54	19	1.04	0.74
comp101191_c1	comp101191_c1_seq1,comp101191_c1_seq2,comp101191_c1_seq3,comp101191_c1_seq5	1147.52	1096.06	16	0.88	0.63
comp101191_c2	comp101191_c2_seq1	507	455.58	3	0.4	0.29
comp101191_c3	comp101191_c3_seq1,comp101191_c3_seq2,comp101191_c3_seq3,comp101191_c3_seq4,comp101191_c3_seq5	706.88	655.45	17	1.58	1.13
comp101191_c4	comp101191_c4_seq1,comp101191_c4_seq2	707.45	656.01	33	3.06	2.19
comp101191_c5	comp101191_c5_seq1,comp101191_c5_seq2,comp101191_c5_seq3	936.32	884.86	14	0.96	0.69
comp101191_c6	comp101191_c6_seq1	960	908.54	3	0.2	0.14
comp101192_c0	comp101192_c0_seq1,comp101192_c0_seq2	3859.67	3808.21	1509	23.91	17.14
comp101193_c2	comp101193_c2_seq1,comp101193_c2_seq2,comp101193_c2_seq3,comp101193_c2_seq4,comp101193_c2_seq5	2128.78	2077.32	1350.77	39.29	28.16
comp101194_c0	comp101194_c0_seq1,comp101194_c0_seq2,comp101194_c0_seq3,comp101194_c0_seq4,comp101194_c0_seq5	1227.89	1176.43	321	16.52	11.84
comp101194_c1	comp101194_c1_seq2,comp101194_c1_seq3,comp101194_c1_seq4,comp101194_c1_seq5	1803.19	1751.74	313.34	10.81	7.75
comp101195_c0	comp101195_c0_seq1,comp101195_c0_seq2,comp101195_c0_seq3,comp101195_c0_seq4,comp101195_c0_seq5	1372.42	1320.97	8	0.37	0.26
comp101195_c1	comp101195_c1_seq1	615	563.56	0	0	0
comp101196_c0	comp101196_c0_seq1	908	856.54	43	3.05	2.18
comp101196_c1	comp101196_c1_seq1,comp101196_c1_seq2	768	716.54	49	4.15	2.98
comp101196_c2	comp101196_c2_seq1	716	664.55	20	1.83	1.31
comp101196_c3	comp101196_c3_seq1	639	587.56	16	1.66	1.19
comp101196_c4	comp101196_c4_seq2,comp101196_c4_seq3	1013.64	962.19	68	4.28	3.07
comp101196_c6	comp101196_c6_seq1,comp101196_c6_seq2,comp101196_c6_seq3,comp101196_c6_seq5	1041.79	990.34	194	11.87	8.51
comp101196_c7	comp101196_c7_seq3,comp101196_c7_seq4,comp101196_c7_seq5	1289.79	1238.33	26	1.27	0.91
comp101196_c8	comp101196_c8_seq1,comp101196_c8_seq2,comp101196_c8_seq3	579.79	528.35	13	1.5	1.07
comp101196_c9	comp101196_c9_seq2	684	632.55	8	0.77	0.55
comp101197_c1	comp101197_c1_seq1,comp101197_c1_seq2,comp101197_c1_seq3,comp101197_c1_seq4,comp101197_c1_seq5	4205.83	4154.37	466	6.77	4.85
comp101198_c0	comp101198_c0_seq1	542	490.57	6	0.75	0.53
comp101199_c0	comp101199_c0_seq1	563	511.57	2	0.24	0.17
comp101199_c1	comp101199_c1_seq1,comp101199_c1_seq2,comp101199_c1_seq3,comp101199_c1_seq4,comp101199_c1_seq5	1347.38	1295.93	62	2.9	2.08
comp101200_c0	comp101200_c0_seq1,comp101200_c0_seq2,comp101200_c0_seq3,comp101200_c0_seq5	2003.72	1952.27	287.57	8.9	6.38
comp101201_c1	comp101201_c1_seq1	547	495.57	1	0.12	0.09
comp101201_c2	comp101201_c2_seq1,comp101201_c2_seq2,comp101201_c2_seq3,comp101201_c2_seq4,comp101201_c2_seq5	859	807.54	575.35	43.24	30.99
comp101202_c0	comp101202_c0_seq1,comp101202_c0_seq2,comp101202_c0_seq3,comp101202_c0_seq5	844.87	793.42	19	1.45	1.04
comp101203_c0	comp101203_c0_seq1,comp101203_c0_seq2,comp101203_c0_seq3,comp101203_c0_seq4,comp101203_c0_seq5	2289.14	2237.68	2686.73	72.54	51.98
comp101204_c0	comp101204_c0_seq1,comp101204_c0_seq2,comp101204_c0_seq3,comp101204_c0_seq4,comp101204_c0_seq5	2020.67	1969.21	84	2.58	1.85
[truncated: 52,048 more rows]

## Sheet: CS(-15)
Gene_id	Transcript_id(s)	Length	Effective_length	Expected_count	TPM	FPKM
comp100_c0	comp100_c0_seq1	827	771.11	4	0.31	0.22
comp100000_c0	comp100000_c0_seq1,comp100000_c0_seq2,comp100000_c0_seq3,comp100000_c0_seq4,comp100000_c0_seq5	2155.44	2099.55	2463.38	70.32	50.24
comp100001_c0	comp100001_c0_seq1	2069	2013.11	39	1.16	0.83
comp100002_c0	comp100002_c0_seq2,comp100002_c0_seq3,comp100002_c0_seq4,comp100002_c0_seq5	1097.42	1041.52	1640.8	94.65	67.62
comp100003_c0	comp100003_c0_seq1,comp100003_c0_seq2,comp100003_c0_seq3,comp100003_c0_seq4,comp100003_c0_seq5	3021.33	2965.44	767.31	15.5	11.07
comp100004_c1	comp100004_c1_seq1,comp100004_c1_seq2	533	477.14	24	3.04	2.17
comp100005_c0	comp100005_c0_seq1,comp100005_c0_seq2,comp100005_c0_seq3	1694.46	1638.57	29	1.06	0.76
comp100006_c0	comp100006_c0_seq1	534	478.14	0	0	0
comp100006_c1	comp100006_c1_seq1,comp100006_c1_seq2,comp100006_c1_seq3,comp100006_c1_seq4,comp100006_c1_seq5	1212	1156.11	43	2.23	1.6
comp100006_c2	comp100006_c2_seq1,comp100006_c2_seq4	1739.24	1683.34	498.25	17.75	12.68
comp100007_c0	comp100007_c0_seq1	1451	1395.11	25	1.08	0.77
comp100008_c1	comp100008_c1_seq1,comp100008_c1_seq3,comp100008_c1_seq4	1188.37	1132.47	44.49	2.36	1.69
comp100009_c0	comp100009_c0_seq1,comp100009_c0_seq2	1347.37	1291.48	3819.98	177.54	126.85
comp100010_c1	comp100010_c1_seq1,comp100010_c1_seq2,comp100010_c1_seq3,comp100010_c1_seq4,comp100010_c1_seq5	3238.99	3183.09	3341.42	62.86	44.91
comp100010_c3	comp100010_c3_seq1	1043	987.11	33	2.01	1.44
comp100010_c4	comp100010_c4_seq1	1717	1661.11	1044	37.69	26.93
comp100011_c0	comp100011_c0_seq1,comp100011_c0_seq2,comp100011_c0_seq3,comp100011_c0_seq4,comp100011_c0_seq5	1300.8	1244.91	0	0	0
comp100011_c1	comp100011_c1_seq1,comp100011_c1_seq2,comp100011_c1_seq3,comp100011_c1_seq4	677	621.12	5	0.49	0.35
comp100011_c2	comp100011_c2_seq1,comp100011_c2_seq2	570	514.13	1	0.12	0.08
comp100012_c0	comp100012_c0_seq1,comp100012_c0_seq2,comp100012_c0_seq3,comp100012_c0_seq4,comp100012_c0_seq5	3853.2	3797.3	1475	23.25	16.61
comp100012_c2	comp100012_c2_seq1	639	583.12	78	8.07	5.76
comp100012_c4	comp100012_c4_seq1,comp100012_c4_seq2,comp100012_c4_seq3,comp100012_c4_seq4,comp100012_c4_seq5	2115.99	2060.1	2661.9	77.44	55.33
comp100013_c0	comp100013_c0_seq1,comp100013_c0_seq2	550.74	494.88	49	5.98	4.27
comp100013_c1	comp100013_c1_seq2,comp100013_c1_seq3,comp100013_c1_seq4,comp100013_c1_seq5	1123.67	1067.77	196	11.03	7.88
comp100013_c3	comp100013_c3_seq2	792	736.11	40	3.27	2.34
comp100014_c0	comp100014_c0_seq1,comp100014_c0_seq2,comp100014_c0_seq3,comp100014_c0_seq4	1217.31	1161.41	168	8.69	6.21
comp100015_c0	comp100015_c0_seq1,comp100015_c0_seq2	1966	1910.11	0	0	0
comp100015_c1	comp100015_c1_seq1,comp100015_c1_seq2,comp100015_c1_seq4	955.3	899.42	104	6.95	4.97
comp100015_c2	comp100015_c2_seq1,comp100015_c2_seq2,comp100015_c2_seq3,comp100015_c2_seq5	963.74	907.86	54.01	3.58	2.56
comp100016_c0	comp100016_c0_seq1,comp100016_c0_seq3,comp100016_c0_seq4,comp100016_c0_seq5	993.12	937.23	14	0.9	0.64
comp100016_c2	comp100016_c2_seq1	571	515.13	1	0.12	0.08
comp100016_c3	comp100016_c3_seq1,comp100016_c3_seq2	1171.43	1115.53	16	0.86	0.62
comp100017_c0	comp100017_c0_seq2,comp100017_c0_seq5	1908.63	1852.74	631.5	20.43	14.6
comp100017_c1	comp100017_c1_seq2	556	500.13	5	0.6	0.43
comp100017_c3	comp100017_c3_seq1,comp100017_c3_seq2,comp100017_c3_seq3	601	545.13	26	2.88	2.06
comp100018_c0	comp100018_c0_seq1,comp100018_c0_seq2,comp100018_c0_seq3	986.44	930.56	33	2.13	1.52
comp100019_c1	comp100019_c1_seq1,comp100019_c1_seq2,comp100019_c1_seq3,comp100019_c1_seq4	893.81	837.92	64	4.59	3.28
comp100019_c2	comp100019_c2_seq1,comp100019_c2_seq2,comp100019_c2_seq3,comp100019_c2_seq4,comp100019_c2_seq5	1598.26	1542.37	586.22	22.8	16.29
comp100020_c0	comp100020_c0_seq3,comp100020_c0_seq4	1065.41	1009.52	192.05	11.43	8.17
comp100021_c0	comp100021_c0_seq1,comp100021_c0_seq2,comp100021_c0_seq3,comp100021_c0_seq4,comp100021_c0_seq5	791.15	735.27	145	11.87	8.48
comp100022_c0	comp100022_c0_seq1,comp100022_c0_seq2,comp100022_c0_seq3,comp100022_c0_seq4,comp100022_c0_seq5	1149.72	1093.83	98	5.38	3.84
comp100023_c0	comp100023_c0_seq1,comp100023_c0_seq2,comp100023_c0_seq3,comp100023_c0_seq4,comp100023_c0_seq5	3063.7	3007.81	516	10.27	7.34
comp100023_c4	comp100023_c4_seq1,comp100023_c4_seq2,comp100023_c4_seq3,comp100023_c4_seq4,comp100023_c4_seq5	808.6	752.71	29	2.32	1.66
comp100024_c0	comp100024_c0_seq1,comp100024_c0_seq2,comp100024_c0_seq3,comp100024_c0_seq5	1928.51	1872.62	68	2.18	1.56
comp100024_c2	comp100024_c2_seq1	555	499.13	11	1.33	0.95
comp100025_c0	comp100025_c0_seq1	539	483.14	1	0.13	0.09
comp100026_c1	comp100026_c1_seq1	768	712.11	74	6.26	4.47
comp100026_c4	comp100026_c4_seq3	573	517.13	27	3.15	2.25
comp100026_c5	comp100026_c5_seq1,comp100026_c5_seq2,comp100026_c5_seq3,comp100026_c5_seq4	753.1	697.22	43	3.71	2.65
comp100026_c6	comp100026_c6_seq1	628	572.12	18	1.9	1.36
comp100026_c7	comp100026_c7_seq1,comp100026_c7_seq3	1670.01	1614.12	95	3.53	2.52
comp100026_c8	comp100026_c8_seq1,comp100026_c8_seq2	673	617.12	5	0.49	0.35
comp100027_c0	comp100027_c0_seq1,comp100027_c0_seq2	1069.45	1013.56	18	1.07	0.76
comp100028_c0	comp100028_c0_seq2,comp100028_c0_seq3,comp100028_c0_seq4,comp100028_c0_seq5	942.15	886.25	35	2.37	1.7
comp100028_c2	comp100028_c2_seq1,comp100028_c2_seq2	650	594.12	22	2.23	1.6
comp100028_c3	comp100028_c3_seq1,comp100028_c3_seq3	561.5	505.63	0	0	0
comp100029_c0	comp100029_c0_seq1,comp100029_c0_seq2,comp100029_c0_seq3	3151.91	3096.02	110	2.13	1.52
comp100030_c0	comp100030_c0_seq1,comp100030_c0_seq2	1999	1943.11	0	0	0
comp100031_c0	comp100031_c0_seq1,comp100031_c0_seq2	2233.64	2177.75	721.47	19.85	14.18
comp100032_c0	comp100032_c0_seq1,comp100032_c0_seq2,comp100032_c0_seq3,comp100032_c0_seq4	1984.02	1928.13	149	4.63	3.31
comp100033_c0	comp100033_c0_seq1	1410	1354.11	13	0.58	0.41
comp100033_c2	comp100033_c2_seq1	541	485.14	19	2.37	1.69
comp100033_c3	comp100033_c3_seq2,comp100033_c3_seq3,comp100033_c3_seq4,comp100033_c3_seq5	981.63	925.74	38	2.47	1.76
comp100033_c5	comp100033_c5_seq1	641	585.12	31	3.19	2.28
comp100034_c0	comp100034_c0_seq1,comp100034_c0_seq2	1210.43	1154.54	541.95	28.19	20.14
comp100035_c0	comp100035_c0_seq1,comp100035_c0_seq2	554.83	498.96	35	4.24	3.03
comp100035_c1	comp100035_c1_seq2,comp100035_c1_seq4,comp100035_c1_seq5	1136.52	1080.62	722.62	40.17	28.7
comp100036_c0	comp100036_c0_seq1,comp100036_c0_seq2,comp100036_c0_seq3,comp100036_c0_seq4,comp100036_c0_seq5	2494.56	2438.66	1316.48	32.34	23.11
comp100036_c1	comp100036_c1_seq1,comp100036_c1_seq2,comp100036_c1_seq3,comp100036_c1_seq4	2252.1	2196.2	107	2.92	2.09
comp100037_c0	comp100037_c0_seq1	534	478.14	3	0.38	0.27
comp100037_c1	comp100037_c1_seq1,comp100037_c1_seq2,comp100037_c1_seq3,comp100037_c1_seq4,comp100037_c1_seq5	1219.24	1163.35	243	12.54	8.96
comp100037_c2	comp100037_c2_seq1,comp100037_c2_seq2	1559.1	1503.21	1449.99	57.87	41.34
comp100038_c0	comp100038_c0_seq1,comp100038_c0_seq2	1725.69	1669.79	282	10.13	7.24
comp100038_c1	comp100038_c1_seq1,comp100038_c1_seq2,comp100038_c1_seq3	591.19	535.32	10	1.13	0.81
comp100038_c3	comp100038_c3_seq1	677	621.12	0	0	0
comp100038_c4	comp100038_c4_seq1	695	639.11	17	1.6	1.15
comp100038_c5	comp100038_c5_seq1,comp100038_c5_seq2	593	537.13	10	1.12	0.8
comp100038_c8	comp100038_c8_seq1,comp100038_c8_seq2,comp100038_c8_seq3,comp100038_c8_seq4,comp100038_c8_seq5	506.58	450.73	47	6.3	4.5
comp100039_c1	comp100039_c1_seq1,comp100039_c1_seq2,comp100039_c1_seq3,comp100039_c1_seq4,comp100039_c1_seq5	1197	1141.11	3.06	0.16	0.12
comp100040_c0	comp100040_c0_seq1,comp100040_c0_seq2,comp100040_c0_seq3,comp100040_c0_seq4,comp100040_c0_seq5	1412.29	1356.39	262	11.59	8.28
comp100041_c0	comp100041_c0_seq1,comp100041_c0_seq2,comp100041_c0_seq3,comp100041_c0_seq4,comp100041_c0_seq5	1363.92	1308.03	105	4.82	3.44
comp100041_c1	comp100041_c1_seq1,comp100041_c1_seq2,comp100041_c1_seq3,comp100041_c1_seq4,comp100041_c1_seq5	2503.01	2447.12	181	4.43	3.17
comp100041_c3	comp100041_c3_seq1	779	723.11	9	0.75	0.54
comp100042_c0	comp100042_c0_seq1	713	657.11	16	1.47	1.05
comp100042_c1	comp100042_c1_seq1,comp100042_c1_seq2	506	450.15	1	0.13	0.1
comp100042_c4	comp100042_c4_seq2,comp100042_c4_seq3,comp100042_c4_seq5	930	874.11	10	0.69	0.49
comp100042_c5	comp100042_c5_seq1	503	447.15	11	1.49	1.06
comp100043_c0	comp100043_c0_seq1,comp100043_c0_seq2,comp100043_c0_seq3,comp100043_c0_seq4	2543.6	2487.71	1753.87	42.24	30.18
comp100043_c1	comp100043_c1_seq1	522	466.14	43	5.57	3.98
comp100044_c0	comp100044_c0_seq1,comp100044_c0_seq2,comp100044_c0_seq4	613.53	557.65	20	2.16	1.55
comp100045_c0	comp100045_c0_seq2,comp100045_c0_seq4	598.4	542.53	18	2	1.43
comp100045_c1	comp100045_c1_seq1,comp100045_c1_seq2	723.56	667.67	34	3.07	2.19
comp100045_c2	comp100045_c2_seq1,comp100045_c2_seq2	589	533.13	18	2.04	1.46
comp100046_c0	comp100046_c0_seq1,comp100046_c0_seq2	1992.17	1936.27	46.12	1.43	1.02
comp100047_c0	comp100047_c0_seq1,comp100047_c0_seq2	552	496.14	1	0.12	0.09
comp100047_c3	comp100047_c3_seq1,comp100047_c3_seq2,comp100047_c3_seq3,comp100047_c3_seq5	1867	1811.11	16	0.53	0.38
comp100047_c5	comp100047_c5_seq1	1347	1291.11	22	1.02	0.73
comp100048_c0	comp100048_c0_seq1,comp100048_c0_seq2,comp100048_c0_seq3,comp100048_c0_seq4,comp100048_c0_seq5	1603.02	1547.12	688	26.67	19.06
comp100050_c1	comp100050_c1_seq1,comp100050_c1_seq2,comp100050_c1_seq3,comp100050_c1_seq4,comp100050_c1_seq5	2029.31	1973.42	572	17.37	12.41
comp100051_c0	comp100051_c0_seq1,comp100051_c0_seq2,comp100051_c0_seq3,comp100051_c0_seq4,comp100051_c0_seq5	1752.07	1696.18	48	1.7	1.21
comp100052_c0	comp100052_c0_seq1	2537	2481.11	433.94	10.48	7.49
comp100053_c0	comp100053_c0_seq1,comp100053_c0_seq2,comp100053_c0_seq3	1263.39	1207.5	116	5.77	4.12
comp100054_c1	comp100054_c1_seq1,comp100054_c1_seq2,comp100054_c1_seq3,comp100054_c1_seq4,comp100054_c1_seq5	2943.77	2887.88	506.66	10.51	7.51
comp100055_c0	comp100055_c0_seq2,comp100055_c0_seq3,comp100055_c0_seq4,comp100055_c0_seq5	1776.7	1720.81	1292.52	45.04	32.18
comp100056_c0	comp100056_c0_seq1,comp100056_c0_seq2	5025.36	4969.47	533.62	6.43	4.59
comp100057_c0	comp100057_c0_seq1,comp100057_c0_seq2,comp100057_c0_seq3,comp100057_c0_seq4	1812.87	1756.97	145.3	4.96	3.54
comp100058_c0	comp100058_c0_seq1,comp100058_c0_seq2,comp100058_c0_seq3,comp100058_c0_seq4,comp100058_c0_seq5	1262.41	1206.52	68	3.38	2.42
comp100059_c0	comp100059_c0_seq1	1332	1276.11	165.96	7.81	5.58
comp100061_c0	comp100061_c0_seq1,comp100061_c0_seq2,comp100061_c0_seq3,comp100061_c0_seq4,comp100061_c0_seq5	1726.88	1670.99	283	10.16	7.26
comp100062_c1	comp100062_c1_seq1,comp100062_c1_seq2,comp100062_c1_seq3,comp100062_c1_seq5	875.48	819.59	28	2.06	1.47
[truncated: 53,937 more rows]

## Sheet: CS(25)
Gene_id	Transcript_id(s)	Length	Effective_length	Expected_count	TPM	FPKM
[truncated: 54,047 more rows]

## Sheet: CT(2)
Gene_id	Transcript_id(s)	Length	Effective_length	Expected_count	TPM	FPKM
[truncated: 54,047 more rows]

[truncated: 3 more sheets: CT(-5), CT(-15), CT(25)]
