# Supplementary material for: De Novo Assembly and Transcriptome Analysis of Bulb Onion (Allium cepa L.) during Cold Acclimation Using Contrasting Genotypes
Source: PLoS One. 2016 Sep 14;11(9):e0161987. doi: 10.1371/journal.pone.0161987 (PMC5023330; doi:10.1371/journal.pone.0161987)
Supplement: S4 Table — (XLSX) [file pone.0161987.s010.xlsx]

## Sheet: Sheet1
Supplementary Table S4. Combined genes expressed at freezing temperature in CT and CS lines.
Gene_id	log2(CS 25 vs CS -5)	log2 (CT 25 vs CT -5)	Annotation Description	GOs	KO/Gene_ID	KEGG_GENE_NAME
comp85725_c0	-3.09082	-6.86815	methylenetetrahydrofolate reductase [Pinus pinaster]	GO:0044710	K00297	E1.5.1.20, metF
comp57035_c0	-5.37046	-7.57272	cytochrome b [Thrips imaginis]	GO:0009055;GO:0006118;GO:0046872;GO:0022904;GO:0016021;GO:0070469;GO:0005739;GO:0016491	K00412	CYTB, petB
comp72896_c0	-5.94046	-7.74589	Peroxidase 25 precursor, putative [Ricinus communis]	GO:0006804;GO:0006979;GO:0020037;GO:0046872;GO:0004601;GO:0016023;GO:0055114	K00430	E1.11.1.7
comp73860_c0	-8.07829	4.44289	hypothetical protein PRUPE_ppa008516mg [Prunus persica]	_	K00430	E1.11.1.7
comp26658_c0	-3.30627	-3.4309	PREDICTED: probable inositol oxygenase-like [Brachypodium distachyon]	GO:0019310;GO:0005506;GO:0019853;GO:0005737;GO:0006949;GO:0055114;GO:0050113	K00469	MIOX
comp81163_c0	-3.6799	-3.21704	unknown [Lotus japonicus]	GO:0009811;GO:0046872;GO:0009809;GO:0042409;GO:0032259;GO:0009805	K00588	E2.1.1.104
comp26024_c0	-2.63049	-3.57401	Serine transhydroxymethyltransferase 1 isoform 1 [Theobroma cacao]	GO:0008168;GO:0006563;GO:0004372;GO:0006544;GO:0035999;GO:0005739;GO:0030170;GO:0032259	K00600	glyA, SHMT
comp73745_c0	-4.62584	-9.32237	putative chalcone synthase A [Allium cepa]	GO:0009611;GO:0005634;GO:0005783;GO:0009753;GO:0010224;GO:0009629;GO:0006979;GO:0009705;GO:0016210;GO:0009926;GO:0009715;GO:0031540	K00660	E2.3.1.74, bcsA
comp88907_c1	-5.05479	-6.89084	hypothetical protein PRUPE_ppa010831mg [Prunus persica]	GO:0004462;GO:0006090;GO:0009791;GO:0005975;GO:0016740;GO:0009628	K00799	E2.5.1.18, gst
comp103885_c0	-3.66615	-3.89909	RecName: Full=Bifunctional 6(G)-fructosyltransferase/2,1-fructan:2,1-fructan 1-fructosyltransferase; Short=1-FFT; Short=6G-FFT; Short=6GFT;	GO:0005774;GO:0033841;GO:0004553;GO:0016021;GO:0005975;GO:0047207	K01193	E3.2.1.26, sacA
comp102167_c0	2.41669	-4.34858	RecName: Full=Thiol protease SEN102; Flags: Precursor thiol-protease [Hemerocallis hybrid cultivar]	GO:0005788;GO:0008234;GO:0006508	K01365	CTSL
comp88404_c0	-5.6745	-8.32141	chloroplast ribulose-1,5-bisphosphate carboxylase/oxygenase small subunit [Musa acuminata AAA Group]	GO:0009573;GO:0019253;GO:0046487;GO:0009853;GO:0004497;GO:0055114;GO:0016984	K01602	rbcS
comp96517_c2	-2.76894	-4.5706	plastidic aldolase [Solanum tuberosum]	GO:0016020;GO:0048046;GO:0006096;GO:0006020;GO:0006013;GO:0031977;GO:0009941;GO:0010287;GO:0004332;GO:0006000;GO:0006094;GO:0009737;GO:0046686;GO:0006098;GO:0015976;GO:0022626	K01623	ALDO, fbaB
comp96517_c1	-2.63595	-4.75124	Fructose-bisphosphate aldolase, chloroplast precursor, putative, expressed [Oryza sativa Japonica Group]	GO:0016020;GO:0048046;GO:0006096;GO:0006020;GO:0006013;GO:0031977;GO:0005739;GO:0009941;GO:0010287;GO:0004332;GO:0006000;GO:0006094;GO:0009737;GO:0015976;GO:0046686;GO:0006098;GO:0022626	K01623	ALDO, fbaB
comp103860_c0	-3.15481	-5.30353	carbonic anhydrase, putative [Ricinus communis]	GO:0006807;GO:0015976;GO:0006730;GO:0004089;GO:0008270;GO:0009570	K01673	cynT, can
comp98610_c0	-2.56071	-3.89896	1-aminocyclopropane-1-carboxylic acid synthase [Narcissus tazetta var. chinensis]	GO:0042218;GO:0016847;GO:0030170;GO:0006519	K01762	ACS
comp101760_c1	-3.01925	-2.81257	chalcone isomerase [Allium cepa]	GO:0045430;GO:0009813	K01859	E5.5.1.6
comp17998_c0	-4.97333	-7.57272	ATP synthase F0 subunit 6 [Thrips ATP synthase subunit 6 [Thrips imaginis]	GO:0015986;GO:0045263;GO:0005743;GO:0015078	K02126	ATPeF0A, MTATP6
comp90118_c0	-6.36452	-7.14791	ATP synthase lipid-binding protein [Coptotermes formosanus]	GO:0008289;GO:0015986;GO:0015991;GO:0045263;GO:0016021;GO:0015078	K02128	ATPeF0C, ATP5G
comp89076_c0	-5.03991	-6.38456	ATP synthase-beta [Riptortus pedestris]	GO:0015986;GO:0045261;GO:0015991;GO:0005524;GO:0046933	K02133	ATPeF1B, ATP5B
comp69127_c0	-5.33458	-9.65655	cytochrome c oxidase subunit I [Thrips imaginis]	GO:0009055;GO:0020037;GO:0045277;GO:0006123;GO:0004129;GO:0005506;GO:0006118;GO:0009060;GO:0005743;GO:0016021;GO:0015992	K02256	COX1
comp126956_c0	-5.31974	-7.57272	cytochrome c oxidase subunit II [Thrips imaginis]	GO:0045277;GO:0006123;GO:0004129;GO:0005507;GO:0016021;GO:0005743;GO:0015992	K02261	COX2
comp55102_c0	-5.2799	-5.43501	cytochrome c oxidase subunit III [Thrips imaginis]	GO:0019646;GO:0045277;GO:0006123;GO:0004129;GO:0016021;GO:0005739;GO:0015992	K02262	COX3
comp20480_c0	-9.09794	-7.04557	ribosomal protein L10 [Manduca sexta]	GO:0005840;GO:0042254;GO:0006412;GO:0003735	K02866	RP-L10e, RPL10
comp73136_c0	-8.72022	-6.99154	PREDICTED: similar to ribosomal protein L13a [Tribolium castaneum]	GO:0042254;GO:0015934;GO:0006412;GO:0003735	K02872	RP-L13Ae, RPL13A
comp20054_c0	-6.69183	-6.46606	ribosomal protein L13 [Chrysomela tremula]	GO:0005840;GO:0042254;GO:0006412;GO:0003735	K02873	RP-L13e, RPL13
comp61841_c0	-5.1402	-6.29817	ribosomal protein L14 [Bombyx ribosomal protein L14 [Bombyx mori]	_	K02875	RP-L14e, RPL14
comp46063_c0	-6.45357	-6.38456	ribosomal protein L17 [Riptortus pedestris]	GO:0042254;GO:0015934;GO:0006412;GO:0003735	K02880	RP-L17e, RPL17
comp44500_c0	-5.77498	-6.38456	ribosomal protein L22 [Riptortus pedestris]	GO:0005840;GO:0042254;GO:0006412;GO:0003735	K02891	RP-L22e, RPL22
comp82746_c0	-5.50741	-6.38456	PREDICTED: 60S ribosomal protein L35a isoform 2 [Apis mellifera]	GO:0005840;GO:0042254;GO:0006412;GO:0003735	K02917	RP-L35Ae, RPL35A
comp89173_c0	-7.04696	-7.24347	PREDICTED: similar to ribosomal protein L3e [Tribolium castaneum]	GO:0005840;GO:0042254;GO:0006412;GO:0003735	K02925	RP-L3e, RPL3
comp99569_c0	3.90446	-3.89022	ubiquitin/ribosomal protein L40 fusion protein [Dictyostelium fasciculatum]	_	K02927	RP-L40e, RPL40
comp83157_c0	-9.88825	-7.60906	PREDICTED: 60S ribosomal protein L4-like [Nasonia vitripennis]	GO:0005840;GO:0042254;GO:0006412;GO:0003735	K02930	RP-L4e, RPL4
comp160710_c0	-4.7553	-7.09765	RecName: Full=60S ribosomal protein L5 RPL5A-related protein [Helianthus annuus]	GO:0005840;GO:0042254;GO:0005524;GO:0006298;GO:0030983;GO:0006412;GO:0008097;GO:0003735	K02932	RP-L5e, RPL5
comp60861_c0	-6.14684	-6.29817	60S ribosomal protein L6 [Coptotermes formosanus]	GO:0030529	K02934	RP-L6e, RPL6
comp43731_c0	-5.72262	-6.87701	60S ribosomal protein L7a [Zea 60S ribosomal protein L7a [Zea mays]	GO:0005840;GO:0042254	K02936	RP-L7Ae, RPL7A
comp60519_c0	-6.29761	-7.14791	ribosomal protein L7e [Scarabaeus laticollis]	GO:0005840	K02937	RP-L7e, RPL7
comp58373_c0	-9.30404	-6.46606	ribosomal protein L8 [Lysiphlebus testaceipes]	GO:0042254;GO:0003723;GO:0015934;GO:0006412;GO:0003735	K02938	RP-L8e, RPL8
comp87558_c0	-5.42783	-7.09765	PREDICTED: 60S acidic ribosomal protein P0-like [Megachile rotundata]	GO:0005840;GO:0042254;GO:0006414;GO:0003735	K02941	RP-LP0, RPLP0
comp167743_c0	-7.80732	-6.38456	ribosomal protein S24 [Riptortus pedestris]	GO:0005840;GO:0042254;GO:0000166;GO:0006412;GO:0003735	K02974	RP-S24e, RPS24
comp46523_c0	-6.31539	-6.68612	ribosomal protein S2 [Riptortus pedestris]	GO:0042254;GO:0003723;GO:0006412;GO:0003735;GO:0015935	K02981	RP-S2e, RPS2
comp83620_c0	-9.51785	-7.41747	40S ribosomal protein S3a [Coptotermes formosanus]	GO:0005840;GO:0042254;GO:0006412;GO:0003735	K02984	RP-S3Ae, RPS3A
comp73892_c0	-6.95845	-7.04557	ribosomal protein S4e [Sphaerius sp. APV-2005]	GO:0005840;GO:0042254;GO:0006412;GO:0003735;GO:0019843	K02987	RP-S4e, RPS4
comp74382_c0	-6.76325	-6.93541	PREDICTED: 40S ribosomal protein S5a-like [Bombus impatiens]	GO:0042254;GO:0003723;GO:0000166;GO:0006412;GO:0003735;GO:0015935	K02989	RP-S5e, RPS5
comp146540_c0	-8.63117	-6.38456	hypothetical protein SINV_03480 [Solenopsis invicta]	GO:0005840;GO:0042254;GO:0006412;GO:0003735	K02993	RP-S7e, RPS7
comp73865_c0	-4.59514	-7.24347	PREDICTED: similar to S9e ribosomal protein isoform 1 [Tribolium castaneum]	GO:0042254;GO:0006412;GO:0003735;GO:0015935;GO:0019843	K02997	RP-S9e, RPS9
comp72164_c0	-5.32202	-6.75259	PREDICTED: 40S ribosomal protein SA-like [Nasonia vitripennis]	GO:0005840	K02998	RP-SAe, RPS0
comp48579_c0	-5.55788	-4.7977	uncharacterized protein LOC100037382 [Danio rerio]	GO:0005840;GO:0006448;GO:0003746;GO:0005853	K03233	EEF1G
comp92350_c0	-3.17038	-7.77816	unknown [Picea sitchensis]	GO:0005840;GO:0009409;GO:0006184;GO:0006448;GO:0003746;GO:0003924;GO:0005730;GO:0005507;GO:0005829;GO:0005525;GO:0005886;GO:0009507	K03234	EEF2
comp96006_c1	-7.54261	-7.41747	elongation factor 2 [Schistocerca gregaria]	GO:0005840;GO:0006184;GO:0006448;GO:0003746;GO:0005525;GO:0003924	K03234	EEF2
comp80303_c1	-6.46789	-6.68612	eukaryotic initiation factor 4a [Tribolium castaneum]	GO:0005840;GO:0006446;GO:0003743;GO:0005524;GO:0008026	K03257	EIF4A
comp98469_c1	-4.94884	-7.57272	heat shock protein 70 cognate [Frankliniella occidentalis]	_	K03283	HSPA1_8
comp17892_c0	-3.19453	-8.24112	predicted protein [Populus predicted protein [Populus trichocarpa]	GO:0016020;GO:0015238;GO:0015297;GO:0006855	K03327	TC.MATE, SLC47A, norM, mdtK, dinF
comp73024_c0	-3.07015	-6.90059	chloroplast photosystem II 22 kDa component [Nicotiana benthamiana]	_	K03542	psbS
comp44976_c0	-8.90884	-6.68612	NADH dehydrogenase subunit 1 [Thrips imaginis]	GO:0016021;GO:0005739;GO:0055114;GO:0016491	K03878	ND1
comp92693_c0	-2.69531	-3.25049	PREDICTED: calcyclin-binding protein [Vitis vinifera]	_	K04507	CACYBP, SIP
comp81614_c0	-2.56488	-3.87305	anthocyanidin synthase [Allium cepa]	GO:0016706;GO:0005506;GO:0055114	K05277	E1.14.11.19
comp93905_c0	-2.42468	-3.01348	PREDICTED: prenyl transferase-like [Brachypodium distachyon]	GO:0006694;GO:0008299;GO:0005783;GO:0006744;GO:0052923;GO:0046872;GO:0050347;GO:0000010;GO:0015979;GO:0009507	K05356	SPS, sds
comp94012_c0	-6.01569	-8.01324	ADP/ATP tranlocase [Danaus plexippus]	GO:0055085;GO:0016021;GO:0005743;GO:0005215	K05863	SLC25A4S, ANT
comp118627_c0	-4.40547	-5.95599	unknown [Zea mays]	GO:0016787	K06130	LYPLA2
comp78263_c0	-9.08682	-6.38456	hypothetical protein SINV_07010 [Solenopsis invicta]	GO:0045859;GO:0046958;GO:0007095;GO:0046982;GO:0042313;GO:0005737;GO:0007088;GO:0005875;GO:0008426;GO:0007411;GO:0008103;GO:0045927;GO:0007294;GO:0005634;GO:0009411;GO:0048190;GO:0005694;GO:0045172;GO:0008340;GO:0019904;GO:0007280;GO:0007265	K06630	YWHA
comp94836_c0	-2.73742	-3.96046	Os03g0701200 [Oryza sativa Japonica Group]	GO:0016787;GO:0008152	K07025	K07025
comp84526_c0	-3.29389	-8.39939	PREDICTED: zinc-binding alcohol dehydrogenase domain-containing protein 2 [Vitis vinifera]	GO:0043231;GO:0000166;GO:0008270;GO:0055114;GO:0044444;GO:0016491	K07119	K07119
comp99053_c2	-3.12305	-3.91662	PREDICTED: uncharacterized protein LOC101260696 [Solanum lycopersicum]	_	K07195	EXOC7, EXO70
comp66454_c0	3.7869	-11.0368	RecName: Full=Peptide methionine sulfoxide reductase; AltName: Full=Fruit-ripening protein E4; AltName: Full=Peptide-methionine (S)-S-oxide reductase; Short=Peptide	GO:0006464;GO:0008113;GO:0055114	K07304	msrA
comp95009_c0	-4.73511	-7.3759	RecName: Full=Tubulin beta-1 chain; AltName: Full=Beta-1-tubulin beta-1 tubulin [Manduca sexta]	GO:0005874;GO:0006184;GO:0005200;GO:0005737;GO:0003924;GO:0051258;GO:0007017;GO:0005525	K07375	TUBB
comp35402_c0	-5.48542	-6.46606	calreticulin [Schistocerca gregaria]	GO:0006457;GO:0005783;GO:0005509;GO:0051082	K08057	CALR
comp95014_c0	-2.40411	-3.54111	Xyloglucan endotransglucosylase/hydrolase protein 30 [Theobroma cacao]	GO:0016757;GO:0016787;GO:0005975	K08235	E2.4.1.207
comp17935_c0	-3.1851	-5.7029	PREDICTED: probable xyloglucan endotransglucosylase/hydrolase protein 33 [Vitis vinifera]	GO:0016787;GO:0071944;GO:0005975;GO:0009987	K08235	E2.4.1.207
comp80911_c0	-5.73102	-7.41747	hypothetical protein [Riptortus pedestris]	GO:0046872	K09250	CNBP
comp55556_c0	-3.04448	-7.33309	R2R3-MYB transcription factor MYB2 [Epimedium sagittatum]	GO:0003677;GO:0000785;GO:0003682	K09422	MYBP
comp55037_c0	-3.39737	-4.43125	Serine carboxypeptidase-like 50 [Theobroma cacao]	GO:0004180;GO:0016023	K09645	CPVL
comp104043_c0	-2.97997	-4.74336	allene oxide cyclase [Gladiolus hybrid cultivar]	GO:0009535;GO:0009620;GO:0009409;GO:0009651;GO:0009941;GO:0010319;GO:0005886;GO:0009570;GO:0046423;GO:0009269	K10525	E5.3.99.6, aoc
comp109721_c0	-4.32742	-5.96367	hypothetical protein SORBIDRAFT_07g005210 [Sorghum bicolor]	_	K10704	UBE2V
comp97033_c0	-3.69143	-4.90577	phenylalanine lyase [Allium cepa]	GO:0009555;GO:0045548;GO:0009800;GO:0005737;GO:0042398;GO:0009821;GO:0009963;GO:0006559;GO:0009805;GO:0006598;GO:0009611;GO:0046274;GO:0046244;GO:0010224;GO:0006979;GO:0080167;GO:0006952;GO:0009819;GO:0006570	K10775	E4.3.1.24
comp99222_c0	-4.54266	-6.5432	unknown [Dendroctonus ponderosae]	_	K10802	HMGB1
comp72178_c0	-2.92176	-6.0898	PREDICTED: two-component response regulator-like APRR5-like [Solanum lycopersicum]	GO:0045892;GO:0005634;GO:0003677;GO:0005982;GO:0051170;GO:0035556;GO:0009640;GO:0042752;GO:0000160;GO:0048574;GO:0010218;GO:0045449;GO:0000156;GO:0010114	K12130	APRR5
comp96197_c0	3.22535	4.50084	hypothetical protein SORBIDRAFT_05g026120 [Sorghum bicolor]	_	K12602	WDR61, REC14, SKI8
comp78002_c0	-7.93682	-6.29817	hypothetical protein DAPPUDRAFT_213150 [Daphnia pulex]	GO:0005524;GO:0008026;GO:0003676	K12823	DDX5, DBP2
comp95768_c0	-4.14306	-7.04557	PREDICTED: polyadenylate-binding protein 1-like [Apis florea]	GO:0003723;GO:0000166	K13126	PABPC
comp104153_c0	-4.70153	-3.40226	calmodulin-like protein [Musa acuminata]	GO:0005509	K13448	CML
comp96043_c0	-6.94327	-6.60702	hypothetical protein OsI_33431 [Oryza sativa Indica Group]	_	K13464	JAZ
comp98431_c0	2.80013	5.39173	PREDICTED: indole-3-acetic acid-induced protein ARG7-like [Cicer arietinum]	_	K14488	SAUR
comp51342_c0	-3.05835	-3.44707	PREDICTED: abscisic acid receptor PYL4-like [Cucumis sativus]	_	K14496	PYL
comp58119_c0	-5.18114	-6.75259	receptor for activated protein kinase C-like [Blattella germanica]	GO:0016310;GO:0016301	K14753	RACK1
comp103060_c0	-4.09408	-2.90716	Dicarboxylate carrier 2 [Theobroma cacao]	GO:0005310;GO:0055085;GO:0006835;GO:0016021;GO:0031966;GO:0006839	K15104	SLC25A11, OGC
comp96443_c1	-3.55352	-5.83728	acyltransferase, putative [Ricinus communis]	GO:0044711;GO:0006950;GO:0016747;GO:0009628;GO:0044249;GO:0008610	K15397	KCS
comp61522_c0	-3.33515	-5.68672	beta-carotene hydroxylase [Narcissus pseudonarcissus]	GO:0016123;GO:0005506;GO:0016021;GO:0009536;GO:0016119;GO:0006633;GO:0055114;GO:0016491	K15746	crtZ
comp87857_c0	-3.71533	-6.17255	Zinc finger protein CONSTANS-LIKE 4 [Triticum urartu]	_	None	_
comp72587_c1	-4.32306	-3.87264	Zinc finger A20 and AN1 domain-containing stress-associated protein 5, putative [Theobroma cacao]	GO:0003677;GO:0008270	None	_
comp62843_c0	-3.85065	-4.63998	unnamed protein product [Vitis vinifera]	_	None	_
comp67938_c0	-5.1895	-3.85226	unnamed protein product [Vitis vinifera]	GO:0005452;GO:0010036;GO:0005773;GO:0035445;GO:0015701;GO:0005768;GO:0043674;GO:0080139;GO:0006821;GO:0016021;GO:0016328	None	_
comp28671_c0	-6.42441	-6.14807	unnamed protein product [Thellungiella halophila]	GO:0003677;GO:0009414;GO:0006355;GO:0005515;GO:0048510;GO:0005667;GO:0006649;GO:0005576;GO:0008270;GO:0005886;GO:0003700;GO:0005802;GO:0005768;GO:0008289;GO:0012501;GO:0005794;GO:0045449	None	_
comp64539_c0	2.56891	2.89369	unknown protein [Ophiopogon japonicus]	_	None	_
comp36539_c0	-4.74458	-6.29817	unknown [Zea mays]	_	None	_
comp27895_c0	-4.46428	-5.65114	unknown [Populus trichocarpa]	GO:0010380;GO:0080167;GO:0010218;GO:0009409;GO:0010114;GO:0010224	None	_
comp86972_c0	-4.21318	-6.3528	unknown [Lotus japonicus]	GO:0016758	None	_
comp76826_c0	-5.217	-8.92655	Uncharacterized protein TCM_031228 [Theobroma cacao]	_	None	_
comp28233_c0	-5.51331	-7.03932	uncharacterized protein LOC100274977 [Zea mays]	_	None	_
comp112334_c0	-3.23005	-6.83333	uncharacterized protein LOC100216968 [Zea mays]	_	None	_
comp72910_c0	5.85856	-5.26924	uncharacterized protein [Arabidopsis thaliana]	GO:1901700;GO:0050789;GO:0006950;GO:0044237;GO:0009536;GO:0009628;GO:0044765	None	_
comp62174_c0	-2.48374	-3.08791	uncharacterized protein [Arabidopsis thaliana]	_	None	_
comp43096_c0	-4.64111	4.47498	uncharacterized protein [Arabidopsis thaliana]	_	None	_
comp88727_c0	-2.94727	-9.04222	TPA: hypothetical protein ZEAMMB73_715393 [Zea mays]	GO:0046872;GO:0030001	None	_
comp72135_c0	-5.2358	-4.32341	TPA: hypothetical protein ZEAMMB73_479101 [Zea mays]	_	None	_
comp76253_c0	-3.73064	-6.29817	sniffer [Drosophila melanogaster]	GO:0006691;GO:0006693;GO:0004090	None	_
comp104417_c0	-2.50433	-4.84251	Rubredoxin-like superfamily protein [Theobroma cacao]	_	None	_
comp87869_c0	-8.87044	2.98479	RNA-directed DNA polymerase (Reverse transcriptase); Polynucleotidyl transferase, Ribonuclease H fold [Medicago truncatula]	GO:0097159;GO:1901363;GO:0003824	None	_
comp39872_c0	-7.4734	7.70348	Repressor of gene silencing 1 isoform 1 [Theobroma cacao]	GO:0003824	None	_
comp91457_c0	-4.41993	-3.18595	RecName: Full=Lachrymatory-factor synthase; Flags: Precursor lachrymatory factor synthase [Allium cepa]	GO:0005773	None	_
comp85523_c0	-5.8255	-6.46606	putative translationally controlled tumor protein [Graphocephala atropunctata]	GO:0005737	None	_
comp90196_c0	-8.69115	-9.12779	Putative retroelement [Oryza sativa Japonica Group]	_	None	_
comp64389_c0	-3.05959	-7.57575	putative protein kinase superfamily protein [Zea mays]	GO:0004674;GO:0005524;GO:0009069;GO:0006468;GO:0005886	None	_
comp103208_c0	2.84211	2.60076	putative non-LTR retroelement reverse transcriptase [Arabidopsis thaliana]	_	None	_
comp93336_c0	-2.44181	-7.46472	putative cold-regulated protein [Allium sativum]	_	None	_
comp103857_c0	-3.57126	-5.5433	putative cold-regulated protein [Allium sativum]	_	None	_
comp96751_c0	-3.87801	-5.07272	PREDICTED: zinc finger protein ZAT10-like [Glycine max]	_	None	_
comp26623_c0	2.64216	4.88481	PREDICTED: zinc finger protein CONSTANS-LIKE 6-like [Cucumis sativus]	_	None	_
comp84919_c0	-2.46674	-3.30512	PREDICTED: uncharacterized protein LOC101295989 [Fragaria vesca subsp. vesca]	_	None	_
comp84085_c0	-7.25344	-6.86436	PREDICTED: uncharacterized protein LOC101258159 [Solanum lycopersicum]	GO:0005488	None	_
comp86934_c0	-2.95559	-3.06596	PREDICTED: uncharacterized protein LOC101248512 [Solanum lycopersicum]	_	None	_
comp104304_c0	-5.49056	-7.53045	PREDICTED: uncharacterized protein LOC101223869 [Cucumis sativus]	_	None	_
comp29621_c0	-2.91748	-5.97433	PREDICTED: uncharacterized protein LOC101215423 [Cucumis sativus]	_	None	_
comp71965_c0	-3.48015	-5.00742	PREDICTED: uncharacterized protein LOC101208965 [Cucumis sativus]	_	None	_
comp45470_c0	3.45775	-3.98862	PREDICTED: uncharacterized protein LOC101202820 [Cucumis sativus]	GO:0009705;GO:0005783;GO:0009507	None	_
comp27498_c0	-7.13215	-3.95399	PREDICTED: uncharacterized protein LOC100854728 [Vitis vinifera]	GO:0003723;GO:0003677;GO:0006333;GO:0000785;GO:0004190;GO:0003964;GO:0006508;GO:0003682;GO:0006278;GO:0006310	None	_
comp91964_c0	-2.8758	-4.0065	PREDICTED: uncharacterized protein LOC100830331 [Brachypodium distachyon]	_	None	_
comp90911_c0	-3.69364	-7.73003	PREDICTED: uncharacterized protein LOC100790681 [Glycine max]	GO:0009507	None	_
comp101825_c1	-6.26179	2.98224	PREDICTED: uncharacterized protein LOC100782971 [Glycine max]	_	None	_
comp85011_c0	-4.07624	-3.71626	PREDICTED: uncharacterized protein LOC100262755 [Vitis vinifera]	_	None	_
comp95993_c0	-2.9322	-4.15134	PREDICTED: uncharacterized protein LOC100246896 [Vitis vinifera]	_	None	_
comp104888_c0	-3.79232	-2.6893	PREDICTED: uncharacterized protein LOC100242686 [Vitis vinifera]	_	None	_
comp67834_c0	-3.01329	-3.65811	PREDICTED: UDP-glycosyltransferase 90A1-like [Solanum lycopersicum]	GO:0016740	None	_
comp72207_c0	-2.82448	-4.47071	PREDICTED: UDP-glycosyltransferase 85A1 isoform 2 [Vitis vinifera]	_	None	_
comp98122_c0	-3.18353	-6.94776	PREDICTED: transcription factor UNE10-like [Fragaria vesca subsp. vesca]	_	None	_
comp95305_c0	-3.12083	4.77952	PREDICTED: transcription factor HEC1-like [Glycine max]	GO:0080126;GO:0010500;GO:0048462;GO:0046983	None	_
comp68593_c0	-2.37655	-3.80419	PREDICTED: telomere repeat-binding protein 5-like isoform 2 [Solanum lycopersicum]	GO:0042162;GO:0006007;GO:0008301;GO:0009737	None	_
comp93766_c2	-4.39878	-6.46606	PREDICTED: similar to Copia protein (Gag-int-pol protein) [Tribolium castaneum]	_	None	_
comp99543_c0	2.98554	4.41688	PREDICTED: RING-H2 finger protein ATL2-like isoform 1 [Vitis vinifera]	_	None	_
comp74412_c3	-7.80732	2.62599	PREDICTED: putative disease resistance protein RGA4 [Vitis vinifera]	_	None	_
comp74680_c0	3.75145	-3.56825	PREDICTED: purple acid phosphatase 15-like [Cicer arietinum]	GO:0019497;GO:0046872;GO:0006771;GO:0003993	None	_
comp96192_c1	3.17691	2.86379	PREDICTED: protein NYNRIN-like [Fragaria vesca subsp. vesca]	_	None	_
comp64012_c0	-3.33256	-2.63261	PREDICTED: protein LURP-one-related 8 [Vitis vinifera]	_	None	_
comp99902_c0	-2.52815	-5.45367	PREDICTED: probable plastid-lipid-associated protein 12, chloroplastic [Vitis unnamed protein product [Vitis vinifera]	GO:0005198;GO:0009507	None	_
comp84183_c0	6.0902	2.78284	PREDICTED: probable glycosyltransferase At5g03795-like [Cicer arietinum]	GO:0016020;GO:0050508	None	_
comp93885_c0	-3.35955	-3.59677	PREDICTED: probable carboxylesterase 2-like [Vitis vinifera]	_	None	_
comp25000_c0	-2.64535	-2.5494	PREDICTED: probable aquaporin NIP5-1 [Vitis vinifera]	GO:0015105;GO:0080029;GO:0080138;GO:0035445;GO:0015700;GO:0046685;GO:0016021;GO:0016328	None	_
comp138641_c0	-6.3388	-4.15843	PREDICTED: oleosin 18.2 kDa isoform 1 [Vitis vinifera]	GO:0016020;GO:0019915;GO:0005811;GO:0009845;GO:0050826	None	_
comp105069_c0	-3.02223	-8.31865	PREDICTED: nitrate transporter 1.5-like [Fragaria vesca subsp. vesca]	GO:0016020;GO:0006810;GO:0005215	None	_
comp88431_c0	-3.16494	-6.71038	PREDICTED: nitrate transporter 1.3-like [Vitis vinifera]	GO:0016020;GO:0006810;GO:0005215	None	_
comp86378_c0	-4.8123	-5.97429	PREDICTED: mitogen-activated protein kinase kinase kinase ANP1-like [Fragaria vesca subsp. vesca]	_	None	_
comp97767_c0	-4.0631	-5.32175	PREDICTED: mitogen-activated protein kinase kinase kinase A-like [Brachypodium distachyon]	GO:0005739	None	_
comp25306_c1	-2.6404	-2.95188	PREDICTED: methylenetetrahydrofolate reductase 2-like [Fragaria vesca subsp. vesca]	_	None	_
comp104127_c0	-2.57651	6.53632	PREDICTED: guanosine-3',5'-bis(diphosphate) 3'-pyrophosphohydrolase [Vitis unnamed protein product [Vitis vinifera]	GO:0006796	None	_
comp98998_c0	-3.67555	-3.60111	PREDICTED: cytochrome P450 86B1-like [Brachypodium distachyon]	_	None	_
comp102121_c0	-2.48752	-2.95217	PREDICTED: cytochrome P450 71A26-like [Cicer arietinum]	_	None	_
comp73951_c1	-2.78176	-2.82093	PREDICTED: cyclic dof factor 2-like [Cicer arietinum]	GO:0003677;GO:0006355;GO:0008270	None	_
comp99242_c1	-6.1966	-8.64089	PREDICTED: copia protein-like [Acyrthosiphon pisum]	GO:0097159;GO:1901363	None	_
comp73308_c0	-4.64172	-2.98399	PREDICTED: auxin-responsive protein IAA24-like [Brachypodium distachyon]	GO:0050794;GO:0009733;GO:0044699;GO:0006351	None	_
comp83389_c0	-2.9593	-5.8957	PREDICTED: ammonium transporter 1 member 3 [Vitis vinifera]	GO:0008519;GO:0072488;GO:0016021	None	_
comp25662_c0	-2.63922	-8.24819	PREDICTED: 18 kDa seed maturation protein-like [Cucumis sativus]	_	None	_
comp86860_c0	3.76321	-8.6345	predicted protein [Populus predicted protein [Populus trichocarpa]	GO:0044699;GO:0008152;GO:0042221;GO:0050789	None	_
comp104425_c0	3.71253	-7.77816	predicted protein [Populus predicted protein [Populus trichocarpa]	_	None	_
comp85169_c0	-2.44464	-6.05166	predicted protein [Populus predicted protein [Populus trichocarpa]	_	None	_
comp23198_c0	-2.84388	-5.41818	predicted protein [Populus predicted protein [Populus trichocarpa]	GO:0009543	None	_
comp67539_c0	-3.08265	-4.02783	predicted protein [Populus predicted protein [Populus trichocarpa]	_	None	_
comp69099_c0	-3.10373	-3.67528	predicted protein [Populus predicted protein [Populus trichocarpa]	GO:0010583;GO:0010200;GO:0009407	None	_
comp36218_c0	-3.48105	-3.1959	predicted protein [Populus predicted protein [Populus trichocarpa]	GO:0009536	None	_
comp62677_c0	-3.90935	-2.50721	predicted protein [Populus predicted protein [Populus trichocarpa]	_	None	_
comp81400_c0	-8.72022	3.79357	predicted protein [Populus predicted protein [Populus trichocarpa]	GO:0008422;GO:0005975	None	_
comp68439_c0	3.01209	-8.30665	predicted protein [Hordeum vulgare subsp. vulgare]	GO:0016020	None	_
comp123308_c0	-3.34132	-6.69975	predicted protein [Hordeum vulgare subsp. vulgare]	_	None	_
comp81277_c0	-5.73188	5.33059	predicted protein [Hordeum vulgare subsp. vulgare]	_	None	_
comp94995_c0	-7.32986	6.41905	predicted protein [Hordeum vulgare subsp. vulgare]	GO:0016020;GO:0005739;GO:0016023	None	_
comp89094_c0	-6.93293	-8.01228	polygalacturonase-inhibiting protein 4 [Brassica rapa subsp. pekinensis]	_	None	_
comp85579_c0	-2.37435	-5.49681	P-loop containing nucleoside triphosphate hydrolases superfamily protein isoform 1 [Theobroma cacao]	GO:0003677;GO:0005524;GO:0017111;GO:0009941	None	_
comp99399_c0	-2.37526	-3.93666	Plant invertase/pectin methylesterase inhibitor superfamily protein, putative [Theobroma cacao]	_	None	_
comp72071_c0	-3.30519	-4.96729	phytosulfokine precursor [Avicennia marina]	GO:0031012;GO:0008083;GO:0007165;GO:0008283;GO:0005794;GO:0005576;GO:0040007	None	_
comp67056_c0	-3.85173	-7.07083	Phytosulfokine [Medicago Phytosulfokine [Medicago truncatula]	_	None	_
comp96250_c0	-5.29163	-6.23878	Peptide transporter PTR3-B [Medicago truncatula]	GO:0006857;GO:0016021;GO:0005215	None	_
comp86129_c0	-2.9525	-3.35708	pectinesterase inhibitor [Lycoris aurea]	GO:0005982;GO:0045330;GO:0005985;GO:0030599;GO:0005618;GO:0045490;GO:0004857;GO:0043086;GO:0042545	None	_
comp29102_c0	-2.94029	-3.38728	Os07g0418500 [Oryza sativa Japonica Group]	GO:0046872;GO:0016023;GO:0016491	None	_
comp25341_c0	-2.38458	-3.8804	Os04g0526300 [Oryza sativa Japonica Group]	_	None	_
comp87871_c0	-2.8908	-4.96122	Os04g0509600 [Oryza sativa Japonica Group]	GO:0008519;GO:0072488;GO:0016021	None	_
comp93475_c0	-2.4265	-2.63622	Os01g0762300 [Oryza sativa Japonica Group]	_	None	_
comp93616_c0	-3.68821	-2.93001	Ocs element-binding factor, putative [Ricinus communis]	GO:0009267;GO:2000693;GO:0046982;GO:0045893;GO:0016192;GO:0006623;GO:0005667;GO:0043565;GO:0045449;GO:0003700	None	_
comp91476_c0	-2.74058	-10.2639	nitrate transporter, putative [Ricinus communis]	_	None	_
comp95859_c0	-5.71652	-5.35818	NAC protein 1 [Elaeis guineensis]	GO:0005634;GO:0003677;GO:0006355	None	_
comp72764_c0	-2.42338	-6.4028	late embryogenesis abundant protein group 8 protein [Arachis hypogaea]	GO:0005737	None	_
comp91567_c0	7.27027	-6.57019	Inter-alpha-trypsin inhibitor heavy chain H3 precursor, putative [Ricinus communis]	_	None	_
comp74356_c0	-2.71227	-2.87128	induced stolon tip protein [Capsicum annuum]	GO:0003677;GO:0006950;GO:0008270	None	_
comp81560_c0	7.58198	3.8779	hypothetical protein VITISV_041406 [Vitis vinifera]	GO:0015074;GO:0004407;GO:0008270;GO:0000118;GO:0016575;GO:0003676	None	_
comp83976_c0	-2.60924	-3.1985	hypothetical protein VITISV_041315 [Vitis vinifera]	_	None	_
comp83990_c0	-2.5296	-4.88459	hypothetical protein VITISV_041029 [Vitis vinifera]	_	None	_
comp100603_c0	5.87665	-4.13518	hypothetical protein VITISV_029256 [Vitis vinifera]	_	None	_
comp103750_c1	-6.39161	-4.92538	hypothetical protein SORBIDRAFT_10g026350 [Sorghum bicolor]	GO:0005622	None	_
comp105262_c0	-5.23289	-7.32508	hypothetical protein SORBIDRAFT_09g024850 [Sorghum bicolor]	_	None	_
comp111315_c0	3.1563	-2.77941	hypothetical protein SORBIDRAFT_03g041500 [Sorghum bicolor]	_	None	_
comp29491_c0	-2.96323	-4.6022	hypothetical protein SORBIDRAFT_01g040410 [Sorghum bicolor]	_	None	_
comp25757_c0	-2.52445	-4.41991	hypothetical protein SORBIDRAFT_01g031850 [Sorghum bicolor]	_	None	_
comp89663_c0	-4.27784	-7.28898	hypothetical protein SINV_11763 [Solenopsis invicta]	_	None	_
comp61268_c0	-5.36646	-4.26347	hypothetical protein PRUPE_ppb011560mg [Prunus persica]	_	None	_
comp94096_c0	-4.10361	-6.80316	hypothetical protein PRUPE_ppa023336mg [Prunus persica]	GO:0016491	None	_
comp96804_c0	-4.81696	-8.25619	hypothetical protein PRUPE_ppa022555mg [Prunus persica]	GO:0009507	None	_
comp93621_c0	2.61476	2.75798	hypothetical protein PRUPE_ppa019210mg [Prunus persica]	GO:0005615;GO:0006508;GO:0004185;GO:0009742;GO:0016023	None	_
comp84094_c0	-2.65678	-3.8801	hypothetical protein PRUPE_ppa017065mg, partial [Prunus persica]	GO:0007275;GO:0009416	None	_
comp65550_c1	-2.77733	-6.25297	hypothetical protein PRUPE_ppa013360mg [Prunus persica]	_	None	_
comp57332_c1	-3.03552	-4.63013	hypothetical protein PRUPE_ppa007314mg [Prunus persica]	_	None	_
comp73495_c0	-2.74177	-7.22109	hypothetical protein PRUPE_ppa006940mg [Prunus persica]	_	None	_
comp101552_c0	-4.1316	3.70088	hypothetical protein PRUPE_ppa004356mg [Prunus persica]	_	None	_
comp93859_c0	-3.46486	-5.47257	hypothetical protein PRUPE_ppa004238mg [Prunus persica]	_	None	_
comp103879_c0	-3.1952	-13.2101	hypothetical protein OsJ_09557 [Oryza sativa Japonica Group]	_	None	_
comp90061_c0	-2.84671	-3.38005	hypothetical protein OsI_37536 [Oryza sativa Indica Group]	GO:0045892;GO:0003677;GO:0005667;GO:0080167;GO:0009062;GO:0045449;GO:0003700	None	_
comp103029_c0	-3.259	-2.60487	hypothetical protein F775_30582 [Aegilops tauschii]	GO:0016021	None	_
comp101735_c0	-2.8474	-4.22089	hypothetical protein CARUB_v10021086mg [Capsella rubella]	GO:0030154;GO:0016747;GO:0009965;GO:0045893	None	_
comp73859_c0	-2.39	-3.18332	hypothetical protein [Musa acuminata]	GO:0003677;GO:0006950;GO:0008270	None	_
comp72541_c0	-6.07881	-6.44741	hypothetical protein [Hevea brasiliensis]	_	None	_
comp26582_c0	-3.23791	-3.1684	galactinol synthase [Coffea arabica]	GO:0009644;GO:0009414;GO:0009409;GO:0047216;GO:0006012;GO:0009408;GO:0042542	None	_
comp88893_c0	-3.94386	-3.06941	flower-specific gamma-thionin precursor [Zea mays]	GO:0005618;GO:0006952;GO:0051704	None	_
comp101093_c0	-4.60265	-2.66835	Expansin-like protein isoform 1 [Theobroma cacao]	GO:0005618	None	_
comp86841_c0	-7.61824	-8.37717	Dof zinc finger protein DOF5.2 [Triticum urartu]	GO:0005488	None	_
comp70588_c0	-4.47567	-4.26493	DnaJ subfamily C member 2 [Theobroma cacao]	GO:0005634;GO:0003677;GO:0000785;GO:0006355;GO:0009908;GO:0009630;GO:0048262;GO:0003682;GO:0010114;GO:0009793	None	_
comp95819_c0	-3.68848	-3.6147	cytochrome P450, putative [Ricinus communis]	GO:0006952;GO:0019760;GO:0051707;GO:0005488;GO:0016491	None	_
comp85190_c0	-2.80424	-4.82281	cytochrome P450 CYP81 [Narcissus tazetta]	GO:0005488	None	_
comp106961_c0	-2.57106	-5.21016	conserved hypothetical protein [Ricinus communis]	_	None	_
comp65051_c0	-2.5987	-5.16307	conserved hypothetical protein [Ricinus communis]	_	None	_
comp83349_c0	-2.70335	-4.76267	conserved hypothetical protein [Ricinus communis]	_	None	_
comp88323_c0	-6.51988	-4.64132	Collagen alpha-5(VI) chain [Actinoplanes sp. SE50/110]	_	None	_
comp65201_c0	-2.38493	-2.89827	cold-regulated gibberellin-regulated protein 1 LTCOR12 [Allium sativum]	GO:0009741;GO:0006569;GO:0000271;GO:0009739;GO:0048767;GO:0009737;GO:0009932;GO:0009505;GO:0009825;GO:0043481;GO:0009684;GO:0071555	None	_
comp95720_c0	-9.05657	-7.22087	CBF-like transcription factor [Elaeis CBF-like transcription factor 1 [Elaeis guineensis]	GO:0003677;GO:0005667;GO:0006355;GO:0045449;GO:0003700	None	_
comp90568_c0	-7.24781	-8.92655	calmodulin-like protein [Elaeis guineensis]	_	None	_
comp98176_c0	-3.11697	-4.03866	benzoyl coenzyme A: benzyl alcohol benzoyl transferase [Petunia x hybrida]	GO:0016746	None	_
comp103904_c0	-3.41236	-7.14964	Auxin-binding protein ABP19a precursor, putative [Ricinus communis]	GO:0006801;GO:0004784;GO:0048046;GO:0005618;GO:0045735;GO:0055114;GO:0030145	None	_
comp98971_c0	-2.71611	-5.32851	ammonium transporter 1;1 [Arabidopsis thaliana]	GO:0008519;GO:0080181;GO:0043069;GO:0010311;GO:0006944;GO:0043090;GO:0010363;GO:0043269;GO:0006862;GO:0072488;GO:0010310;GO:0016021;GO:0005886;GO:0015695;GO:0015802;GO:0005634;GO:0006612;GO:0009506;GO:0009862;GO:0016788;GO:0009737;GO:0001666;GO:0051258;GO:0003779;GO:0080167;GO:0007010;GO:0006888	None	_
comp96014_c0	-2.52326	-3.36228	Alpha/beta-Hydrolases superfamily protein, putative [Theobroma cacao]	GO:0052689	None	_
comp83938_c0	-13.0346	-14.9962	36.4 kDa proline-rich protein [Triticum urartu]	GO:0016023	None	_
comp59829_c0	-2.42325	-2.70125	1,3-beta-D-glucanase GH17_61 [Populus tremula x Populus tremuloides]	GO:0042973;GO:0005634;GO:0005982;GO:0005985;GO:0046658;GO:0005737	None	_
comp54854_c0	10.1413	-12.7368	_	_	None	_
comp74636_c1	9.89209	-11.4725	_	_	None	_
comp75648_c0	9.70049	-10.7235	_	_	None	_
comp95554_c0	9.31654	-10.5475	_	_	None	_
comp146582_c0	9.20913	-9.99538	_	_	None	_
comp46993_c0	9.16191	-9.43156	_	_	None	_
comp73403_c0	9.09309	-9.18909	_	_	None	_
comp85442_c0	8.97783	-9.02396	_	_	None	_
comp102073_c0	8.81642	-8.86777	_	_	None	_
comp102072_c0	8.71537	-8.6926	_	_	None	_
comp97584_c0	8.66206	-8.58726	_	_	None	_
comp73788_c0	8.47379	-8.28436	_	_	None	_
comp74636_c0	8.12557	-8.14282	_	_	None	_
comp144565_c0	7.84375	-8.0401	_	_	None	_
comp83755_c0	7.81961	-7.90048	_	_	None	_
comp170992_c0	7.74467	-7.77816	_	_	None	_
comp69130_c2	7.5234	-7.6445	_	_	None	_
comp197722_c0	7.49319	-7.53771	_	_	None	_
comp83465_c0	7.43081	-7.51884	_	_	None	_
comp99199_c0	7.33187	-7.46579	_	_	None	_
comp122899_c0	7.23132	-7.45788	_	_	None	_
comp84715_c2	7.11097	-7.3759	_	_	None	_
comp93990_c0	7.02912	-7.14791	_	_	None	_
comp327443_c0	6.80154	-7.07518	_	_	None	_
comp72081_c0	6.69941	-6.93541	_	_	None	_
comp68317_c0	6.28148	-6.81614	_	_	None	_
comp54799_c0	6.2713	-6.75259	_	_	None	_
comp73563_c0	5.48693	-6.68612	_	_	None	_
comp91423_c0	5.08624	-6.68612	_	_	None	_
comp94649_c0	4.46945	-6.61643	_	_	None	_
comp83292_c0	4.42595	-6.58836	_	_	None	_
comp72077_c0	4.41887	-6.5432	_	_	None	_
comp59479_c0	4.27041	-6.53139	_	_	None	_
comp35257_c0	4.26492	-6.52062	_	_	None	_
comp24023_c0	4.26492	-6.48552	_	_	None	_
comp97847_c0	4.18121	-6.468	_	_	None	_
comp1268_c0	4.16857	-6.46606	_	_	None	_
comp81808_c0	4.09693	-6.38456	_	_	None	_
comp89707_c0	4.05342	-6.30605	_	_	None	_
comp57875_c0	4.01839	-6.29817	_	_	None	_
comp91746_c0	3.98892	-6.29817	_	_	None	_
comp103035_c0	3.96183	-6.28321	_	_	None	_
comp87593_c0	3.92409	-5.96283	_	_	None	_
comp97757_c3	3.8425	-5.90239	_	_	None	_
comp34427_c0	3.81283	-5.839	_	_	None	_
comp96074_c0	3.73376	-5.82707	_	_	None	_
comp99060_c0	3.64387	-5.80365	_	_	None	_
comp55528_c0	3.58845	-5.76237	_	_	None	_
comp94938_c0	3.49878	-5.71839	_	_	None	_
comp266405_c0	3.46583	-5.61804	_	_	None	_
comp94794_c0	3.45198	-5.61137	_	_	None	_
comp34510_c1	3.42576	-5.5493	_	_	None	_
comp92396_c0	3.42052	-5.5359	_	_	None	_
comp98013_c0	3.36718	-5.4184	_	_	None	_
comp99798_c0	3.31688	-5.39773	_	_	None	_
comp72009_c0	3.27725	-5.39145	_	_	None	_
comp84043_c0	3.2746	-5.37048	_	_	None	_
comp73168_c0	3.24236	-5.34474	_	_	None	_
comp88298_c0	3.2159	-5.34294	_	_	None	_
comp99446_c0	3.20935	-5.32016	_	_	None	_
comp103497_c0	3.14735	-5.27149	_	_	None	_
comp101106_c1	3.13207	-5.0777	_	_	None	_
comp93355_c0	3.09777	-5.07639	_	_	None	_
comp20740_c0	3.04109	-5.06998	_	_	None	_
comp82587_c0	3.02969	-4.98794	_	_	None	_
comp91191_c0	3.00276	-4.94797	_	_	None	_
comp98705_c0	2.98628	-4.8321	_	_	None	_
comp72563_c0	2.98538	-4.74774	_	_	None	_
comp89344_c1	2.96038	-4.73993	_	_	None	_
comp102149_c4	2.95108	-4.71538	_	_	None	_
comp100914_c3	2.94712	-4.71538	_	_	None	_
comp72832_c0	2.94655	-4.71251	_	_	None	_
comp89518_c0	2.82116	-4.70588	_	_	None	_
comp73609_c0	2.80221	-4.68064	_	_	None	_
comp101957_c5	2.76437	-4.64398	_	_	None	_
comp103207_c2	2.7552	-4.61488	_	_	None	_
comp17976_c0	2.74255	-4.61488	_	_	None	_
comp107521_c0	2.72822	-4.60546	_	_	None	_
comp81039_c0	2.69256	-4.4385	_	_	None	_
comp101560_c0	2.60783	-4.40227	_	_	None	_
comp27431_c0	2.46795	-4.38519	_	_	None	_
comp48527_c0	-2.45871	-4.28863	_	_	None	_
comp103099_c1	-2.481	-4.28437	_	_	None	_
comp101367_c0	-2.59596	-4.14283	_	_	None	_
comp56474_c0	-2.59833	-4.13394	_	_	None	_
comp102734_c0	-2.61778	-4.12299	_	_	None	_
comp88908_c0	-2.65952	-4.06136	_	_	None	_
comp97514_c0	-2.67536	-4.04871	_	_	None	_
comp95550_c0	-2.67763	-4.02783	_	_	None	_
comp96070_c0	-2.67948	-4.02137	_	_	None	_
comp97514_c1	-2.71061	-4.02137	_	_	None	_
comp103313_c3	-2.72335	-3.97294	_	_	None	_
comp90445_c0	-2.72385	-3.9717	_	_	None	_
comp29320_c0	-2.72482	-3.95671	_	_	None	_
comp121949_c0	-2.74907	-3.9133	_	_	None	_
comp91479_c0	-2.77864	-3.91001	_	_	None	_
comp87267_c0	-2.91883	-3.86066	_	_	None	_
comp88152_c0	-2.95168	-3.83004	_	_	None	_
comp94565_c0	-3.06236	-3.82301	_	_	None	_
comp56607_c0	-3.09384	-3.81568	_	_	None	_
comp100053_c0	-3.09893	-3.8033	_	_	None	_
comp95993_c2	-3.13828	-3.80108	_	_	None	_
comp84682_c0	-3.14025	-3.76066	_	_	None	_
comp35686_c0	-3.15778	-3.75933	_	_	None	_
comp87832_c0	-3.16438	-3.75933	_	_	None	_
comp71982_c0	-3.22456	-3.70887	_	_	None	_
comp98475_c0	-3.25238	-3.69608	_	_	None	_
comp52103_c0	-3.27767	-3.65803	_	_	None	_
comp85609_c1	-3.28367	-3.6203	_	_	None	_
comp96143_c0	-3.36676	-3.61138	_	_	None	_
comp83428_c0	-3.40847	-3.60633	_	_	None	_
comp25877_c0	-3.44654	-3.60617	_	_	None	_
comp105990_c0	-3.48478	-3.60507	_	_	None	_
comp56873_c0	-3.48923	-3.6025	_	_	None	_
comp100583_c1	-3.48923	-3.58279	_	_	None	_
comp61748_c0	-3.51793	-3.5599	_	_	None	_
comp103059_c1	-3.58248	-3.52976	_	_	None	_
comp82993_c0	-3.58248	-3.52575	_	_	None	_
comp93782_c0	-3.6191	-3.48401	_	_	None	_
comp103451_c2	-3.63318	-3.45987	_	_	None	_
comp96538_c0	-3.65024	-3.43314	_	_	None	_
comp86940_c0	-3.68498	-3.42082	_	_	None	_
comp102684_c0	-3.69019	-3.39593	_	_	None	_
comp96434_c1	-3.73064	-3.36076	_	_	None	_
comp103003_c0	-3.74508	-3.32568	_	_	None	_
comp101252_c0	-3.76691	-3.24955	_	_	None	_
comp94531_c0	-3.7743	-3.23247	_	_	None	_
comp98873_c0	-3.79677	-3.21112	_	_	None	_
comp85408_c0	-3.84782	-3.18154	_	_	None	_
comp88265_c0	-3.85028	-3.1772	_	_	None	_
comp99352_c0	-3.85388	-3.08999	_	_	None	_
comp58870_c0	-3.91461	-3.05961	_	_	None	_
comp93869_c0	-3.9538	-3.05298	_	_	None	_
comp73320_c0	-4.06208	-3.01197	_	_	None	_
comp73468_c0	-4.10211	-2.95763	_	_	None	_
comp90609_c0	-4.11327	-2.9422	_	_	None	_
comp81354_c0	-4.12317	-2.93513	_	_	None	_
comp101515_c2	-4.13809	-2.92663	_	_	None	_
comp172095_c0	-4.22149	-2.89866	_	_	None	_
comp65036_c1	-4.23544	-2.89403	_	_	None	_
comp74336_c0	-4.25873	-2.88072	_	_	None	_
comp92719_c0	-4.26262	-2.79464	_	_	None	_
comp34155_c0	-4.29504	-2.76623	_	_	None	_
comp98347_c8	-4.33046	-2.75365	_	_	None	_
comp55834_c0	-4.36502	-2.75078	_	_	None	_
comp73452_c0	-4.41246	-2.75033	_	_	None	_
comp134207_c0	-4.44182	-2.74209	_	_	None	_
comp141066_c0	-4.59104	-2.73476	_	_	None	_
comp106321_c0	-4.61627	-2.73389	_	_	None	_
comp108491_c0	-4.6568	-2.71172	_	_	None	_
comp72858_c0	-4.66893	-2.66126	_	_	None	_
comp101353_c0	-4.69801	-2.58763	_	_	None	_
comp74129_c1	-4.72456	-2.58213	_	_	None	_
comp100211_c0	-4.73421	-2.57425	_	_	None	_
comp75526_c1	-4.74139	-2.48339	_	_	None	_
comp125326_c0	-4.77803	-2.43585	_	_	None	_
comp97268_c0	-4.81696	-2.3625	_	_	None	_
comp85324_c0	-4.87462	2.43827	_	_	None	_
comp17526_c0	-4.87716	2.49447	_	_	None	_
comp53183_c0	-4.9038	2.51295	_	_	None	_
comp39749_c0	-4.90894	2.52523	_	_	None	_
comp18729_c0	-5.0034	2.56989	_	_	None	_
comp101102_c0	-5.00769	2.65997	_	_	None	_
comp73223_c0	-5.00846	2.72146	_	_	None	_
comp84560_c0	-5.07805	2.74098	_	_	None	_
comp77673_c0	-5.09772	2.76394	_	_	None	_
comp93610_c2	-5.12278	2.82536	_	_	None	_
comp87616_c0	-5.14843	2.8365	_	_	None	_
comp100581_c0	-5.213	2.88061	_	_	None	_
comp25639_c0	-5.23083	2.88539	_	_	None	_
comp60429_c0	-5.2405	2.91716	_	_	None	_
comp107095_c0	-5.25184	2.92418	_	_	None	_
comp95058_c0	-5.26058	2.97413	_	_	None	_
comp80828_c0	-5.31667	2.98803	_	_	None	_
comp94151_c0	-5.31833	3.01704	_	_	None	_
comp98072_c0	-5.34923	3.02895	_	_	None	_
comp165044_c0	-5.42798	3.04188	_	_	None	_
comp45827_c0	-5.44415	3.04219	_	_	None	_
comp163800_c0	-5.45698	3.04806	_	_	None	_
comp123821_c0	-5.55788	3.06761	_	_	None	_
comp112015_c0	-5.62617	3.08451	_	_	None	_
comp94118_c0	-5.69651	3.10114	_	_	None	_
comp95768_c1	-5.71888	3.11646	_	_	None	_
comp96194_c0	-5.73413	3.12472	_	_	None	_
comp98357_c0	-5.75051	3.15673	_	_	None	_
comp37792_c0	-5.80046	3.17485	_	_	None	_
comp102754_c7	-5.83392	3.18066	_	_	None	_
comp24132_c0	-5.86027	3.19916	_	_	None	_
comp84421_c0	-5.99288	3.2349	_	_	None	_
comp95922_c0	-6.0008	3.24979	_	_	None	_
comp95679_c0	-6.09949	3.32965	_	_	None	_
comp46561_c0	-6.18043	3.34657	_	_	None	_
comp58521_c0	-6.18043	3.50735	_	_	None	_
comp93610_c3	-6.19554	3.51391	_	_	None	_
comp81881_c0	-6.26179	3.70615	_	_	None	_
comp84231_c0	-6.26179	3.71896	_	_	None	_
comp95625_c0	-6.26179	3.74302	_	_	None	_
comp45557_c0	-6.26179	3.77093	_	_	None	_
comp77706_c0	-6.3388	3.83422	_	_	None	_
comp60628_c0	-6.48149	3.88779	_	_	None	_
comp74992_c0	-6.54787	3.92228	_	_	None	_
comp335892_c0	-6.54787	3.93847	_	_	None	_
comp74410_c0	-6.61133	4.02246	_	_	None	_
comp103271_c0	-6.75815	4.03174	_	_	None	_
comp72419_c0	-6.78651	4.10427	_	_	None	_
comp65807_c0	-6.83211	4.17834	_	_	None	_
comp95150_c0	-6.88564	4.18548	_	_	None	_
comp99899_c7	-6.89249	4.31612	_	_	None	_
comp86018_c0	-6.89249	4.35728	_	_	None	_
comp58396_c0	-7.03816	4.55987	_	_	None	_
comp103162_c0	-7.36711	4.8314	_	_	None	_
comp100853_c1	-7.36711	4.89665	_	_	None	_
comp91741_c0	-7.40342	5.1536	_	_	None	_
comp90290_c0	-7.45186	5.1536	_	_	None	_
comp165197_c0	-7.4734	5.54559	_	_	None	_
comp18418_c0	-7.53582	5.57634	_	_	None	_
comp90296_c0	-7.54014	6.3077	_	_	None	_
comp319366_c0	-7.54014	6.42653	_	_	None	_
comp55205_c0	-7.57239	6.42653	_	_	None	_
comp39999_c0	-7.57239	6.58823	_	_	None	_
comp102015_c2	-7.60394	6.63834	_	_	None	_
comp80412_c0	-7.60394	6.779	_	_	None	_
comp94727_c0	-7.75207	6.823	_	_	None	_
comp54773_c0	-7.80732	6.90716	_	_	None	_
comp78402_c0	-8.14414	7.02485	_	_	None	_
comp121854_c0	-8.34417	7.29856	_	_	None	_
comp55653_c0	-8.41702	7.29856	_	_	None	_
comp90196_c2	-8.5686	7.32939	_	_	None	_
comp110704_c0	-8.66147	7.44653	_	_	None	_
comp74410_c1	-8.73454	7.47438	_	_	None	_
comp100299_c3	-8.79045	7.47438	_	_	None	_
comp83543_c0	-8.83208	7.7498	_	_	None	_
comp76375_c0	-8.92141	7.88047	_	_	None	_
comp103402_c0	-9.11993	7.96143	_	_	None	_
comp88753_c0	-9.21492	8.78032	_	_	None	_
comp22260_c0	-9.23521	8.89812	_	_	None	_
comp100644_c0	-9.32787	8.94864	_	_	None	_
comp139737_c0	-9.36054	8.95853	_	_	None	_
comp72614_c0	-10.063	9.09936	_	_	None	_
comp73636_c0	-10.6588	9.9422	_	_	None	_
comp95891_c1	-4.21692	-4.60901	(R)-limonene synthase, putative [Ricinus communis]	GO:0046872;GO:0010333	None	_
comp93762_c1	-3.91785	-2.8931	_	_	None	_
comp81466_c0	3.56172	2.83545	_	_	None	_
comp99556_c0	3.09512	6.54051	PREDICTED: probable receptor-like protein kinase At1g49730-like [Fragaria vesca subsp. vesca]	GO:0016772	None	_
comp100334_c4	5.88467	2.64221	PREDICTED: aspartic proteinase-like protein 2-like [Fragaria vesca subsp. vesca]	_	None	_
comp98896_c2	-2.46033	3.68472	unknown [Zea mays]	GO:0016020;GO:0005739	None	_
comp93943_c0	5.0253	3.0436	gag-pol polyprotein [Populus deltoides]	_	None	_
comp91010_c0	-2.69482	-4.15985	_	_	None	_
comp59169_c0	-4.57382	-7.41747	_	_	None	_
comp77519_c0	-7.60394	-3.19535	_	_	None	_
comp89955_c1	2.8614	3.55108	_	_	None	_
comp87433_c0	7.69245	2.74139	_	_	None	_
comp87337_c1	3.94811	-8.9691	_	_	None	_
comp100494_c0	-8.10057	-6.46606	_	_	None	_
