# Supplementary material for: De Novo Assembly and Transcriptome Analysis of Bulb Onion (Allium cepa L.) during Cold Acclimation Using Contrasting Genotypes
Source: PLoS One. 2016 Sep 14;11(9):e0161987. doi: 10.1371/journal.pone.0161987 (PMC5023330; doi:10.1371/journal.pone.0161987)
Supplement: S5 Table — (XLSX) [file pone.0161987.s011.xlsx]

## Sheet: Sheet1
Supplementary Table S5. Complete list of SSRs marker from assembled genes of transcriptomes
Clone	Start BP	Repeat	End BP	Type	Comments
comp63539_c2_seq1	465	(AT)^6	477	Dinucleotide	Forward
comp69633_c0_seq1	777	(GT)^6	789	Dinucleotide	Reverse: complement of AC
comp86224_c0_seq1	723	(GT)^6	735	Dinucleotide	Reverse: complement of AC
comp81145_c0_seq1	2195	(GT)^6	2207	Dinucleotide	Reverse: complement of AC
comp81145_c0_seq1	1675	(AC)^8	1691	Dinucleotide	Forward
comp81145_c0_seq1	2909	(AC)^7	2923	Dinucleotide	Forward
comp91296_c0_seq1	4	(GT)^10	24	Dinucleotide	Reverse: complement of AC
comp83906_c0_seq1	1148	(AC)^6	1160	Dinucleotide	Forward
comp101275_c1_seq1	1	(CT)^8	17	Dinucleotide	Reverse: complement of AG
comp40038_c0_seq1	660	(AT)^9	678	Dinucleotide	Forward
comp102818_c1_seq1	2	(AT)^9	20	Dinucleotide	Forward
comp34427_c0_seq1	2	(AT)^10	22	Dinucleotide	Forward
comp96150_c0_seq1	1421	(GT)^7	1435	Dinucleotide	Reverse: complement of AC
comp103499_c1_seq1	2	(GT)^10	22	Dinucleotide	Reverse: complement of AC
comp82975_c0_seq1	634	(AG)^6	646	Dinucleotide	Forward
comp58438_c1_seq1	1022	(GT)^6	1034	Dinucleotide	Reverse: complement of AC
comp58438_c1_seq1	986	(GT)^8	1002	Dinucleotide	Reverse: complement of AC
comp84208_c0_seq1	1001	(AC)^6	1013	Dinucleotide	Forward
comp62601_c0_seq1	337	(CG)^6	349	Dinucleotide	Forward
comp86394_c0_seq1	67	(AT)^6	79	Dinucleotide	Forward
comp100941_c0_seq1	1	(GT)^11	23	Dinucleotide	Reverse: complement of AC
comp71949_c0_seq1	1051	(AG)^6	1063	Dinucleotide	Forward
comp99326_c3_seq1	1171	(GT)^6	1183	Dinucleotide	Reverse: complement of AC
comp332563_c0_seq1	1	(GT)^10	21	Dinucleotide	Reverse: complement of AC
comp85184_c0_seq1	2092	(AG)^8	2108	Dinucleotide	Forward
comp72819_c0_seq1	1271	(AT)^9	1289	Dinucleotide	Forward
comp102322_c1_seq1	2	(AT)^10	22	Dinucleotide	Forward
comp102322_c1_seq1	388	(AC)^7	402	Dinucleotide	Forward
comp1199578_c0_seq1	362	(AC)^8	378	Dinucleotide	Forward
comp95740_c0_seq1	772	(AG)^6	784	Dinucleotide	Forward
comp14341_c0_seq1	575	(AT)^6	587	Dinucleotide	Forward
comp58847_c0_seq1	614	(GT)^8	630	Dinucleotide	Reverse: complement of AC
comp16808_c0_seq1	847	(AT)^7	861	Dinucleotide	Forward
comp81670_c1_seq1	24	(AG)^9	42	Dinucleotide	Forward
comp92714_c1_seq1	3	(GT)^8	19	Dinucleotide	Reverse: complement of AC
comp694081_c0_seq1	1	(AG)^10	21	Dinucleotide	Forward
comp10333_c0_seq1	407	(AC)^6	419	Dinucleotide	Forward
comp73432_c0_seq1	713	(GT)^7	727	Dinucleotide	Reverse: complement of AC
comp41324_c0_seq1	1	(GT)^10	21	Dinucleotide	Reverse: complement of AC
comp57500_c2_seq1	490	(AT)^10	510	Dinucleotide	Forward
comp57849_c0_seq1	69	(GT)^7	83	Dinucleotide	Reverse: complement of AC
comp369790_c0_seq1	542	(CT)^6	554	Dinucleotide	Reverse: complement of AG
comp34082_c0_seq1	472	(AT)^6	484	Dinucleotide	Forward
comp88899_c0_seq1	2324	(AC)^6	2336	Dinucleotide	Forward
comp47257_c0_seq1	1308	(GT)^8	1324	Dinucleotide	Reverse: complement of AC
comp95664_c1_seq1	2	(AT)^9	20	Dinucleotide	Forward
comp692562_c0_seq1	160	(GT)^7	174	Dinucleotide	Reverse: complement of AC
comp89320_c0_seq1	5	(AG)^6	17	Dinucleotide	Forward
comp10039_c0_seq1	10	(AT)^6	22	Dinucleotide	Forward
comp662085_c0_seq1	8	(GT)^6	20	Dinucleotide	Reverse: complement of AC
comp95664_c3_seq1	1646	(AT)^8	1662	Dinucleotide	Forward
comp94193_c0_seq1	479	(GT)^7	493	Dinucleotide	Reverse: complement of AC
comp103192_c0_seq1	591	(AG)^7	605	Dinucleotide	Forward
comp95055_c0_seq1	257	(GT)^6	269	Dinucleotide	Reverse: complement of AC
comp68203_c0_seq1	362	(CT)^7	376	Dinucleotide	Reverse: complement of AG
comp87955_c1_seq1	521	(GT)^8	537	Dinucleotide	Reverse: complement of AC
comp101289_c2_seq1	1	(AT)^11	23	Dinucleotide	Forward
comp101949_c0_seq1	2268	(CT)^6	2280	Dinucleotide	Reverse: complement of AG
comp397215_c0_seq1	120	(AG)^6	132	Dinucleotide	Forward
comp219523_c0_seq1	633	(AC)^6	645	Dinucleotide	Forward
comp78207_c1_seq1	2	(AT)^7	16	Dinucleotide	Forward
comp77780_c0_seq1	6	(AT)^9	24	Dinucleotide	Forward
comp77780_c0_seq1	30	(GT)^6	42	Dinucleotide	Reverse: complement of AC
comp65361_c0_seq1	167	(AG)^6	179	Dinucleotide	Forward
comp39381_c0_seq1	1	(AT)^9	19	Dinucleotide	Forward
comp100010_c4_seq1	860	(AT)^7	874	Dinucleotide	Forward
comp93545_c0_seq1	28	(AC)^6	40	Dinucleotide	Forward
comp93545_c0_seq1	40	(GT)^7	54	Dinucleotide	Reverse: complement of AC
comp36841_c0_seq1	2	(GT)^8	18	Dinucleotide	Reverse: complement of AC
comp81039_c0_seq1	1087	(GT)^7	1101	Dinucleotide	Reverse: complement of AC
comp89342_c0_seq1	1171	(AT)^6	1183	Dinucleotide	Forward
comp99624_c1_seq1	630	(GT)^7	644	Dinucleotide	Reverse: complement of AC
comp100510_c0_seq1	1270	(AG)^6	1282	Dinucleotide	Forward
comp90401_c0_seq1	949	(GT)^6	961	Dinucleotide	Reverse: complement of AC
comp43424_c0_seq1	1107	(GT)^9	1125	Dinucleotide	Reverse: complement of AC
comp728022_c0_seq1	448	(GT)^6	460	Dinucleotide	Reverse: complement of AC
comp81332_c0_seq1	725	(AG)^10	745	Dinucleotide	Forward
comp35336_c0_seq1	1338	(AT)^8	1354	Dinucleotide	Forward
comp100518_c0_seq1	205	(GT)^7	219	Dinucleotide	Reverse: complement of AC
comp84682_c0_seq1	445	(AG)^6	457	Dinucleotide	Forward
comp106417_c0_seq1	56	(CT)^8	72	Dinucleotide	Reverse: complement of AG
comp89907_c0_seq1	4	(AT)^6	16	Dinucleotide	Forward
comp97569_c0_seq1	1301	(AT)^7	1315	Dinucleotide	Forward
comp313035_c0_seq1	805	(GT)^7	819	Dinucleotide	Reverse: complement of AC
comp101196_c0_seq1	1	(AC)^11	23	Dinucleotide	Forward
comp94889_c0_seq1	1	(AT)^7	15	Dinucleotide	Forward
comp98_c1_seq1	510	(AC)^7	524	Dinucleotide	Forward
comp98_c1_seq1	527	(AT)^9	545	Dinucleotide	Forward
comp418247_c0_seq1	700	(GT)^6	712	Dinucleotide	Reverse: complement of AC
comp37109_c0_seq1	52	(CT)^6	64	Dinucleotide	Reverse: complement of AG
comp31651_c0_seq1	1042	(AG)^7	1056	Dinucleotide	Forward
comp86485_c0_seq1	797	(GT)^7	811	Dinucleotide	Reverse: complement of AC
comp90825_c0_seq1	704	(CT)^8	720	Dinucleotide	Reverse: complement of AG
comp3338_c0_seq1	568	(AC)^6	580	Dinucleotide	Forward
comp92171_c0_seq1	1	(AC)^6	13	Dinucleotide	Forward
comp57184_c0_seq1	3110	(CT)^9	3128	Dinucleotide	Reverse: complement of AG
comp78484_c0_seq1	638	(GT)^7	652	Dinucleotide	Reverse: complement of AC
comp8162_c0_seq1	2	(AT)^8	18	Dinucleotide	Forward
comp97660_c0_seq1	615	(AC)^11	637	Dinucleotide	Forward
comp100389_c1_seq1	1680	(GT)^6	1692	Dinucleotide	Reverse: complement of AC
comp91630_c0_seq1	1059	(AT)^6	1071	Dinucleotide	Forward
comp102262_c1_seq1	1928	(AC)^11	1950	Dinucleotide	Forward
comp91013_c0_seq1	421	(AG)^7	435	Dinucleotide	Forward
comp81357_c0_seq1	1	(AT)^9	19	Dinucleotide	Forward
comp91016_c0_seq1	114	(AG)^8	130	Dinucleotide	Forward
comp57282_c0_seq1	213	(AT)^7	227	Dinucleotide	Forward
comp95795_c0_seq1	91	(AC)^6	103	Dinucleotide	Forward
comp646170_c0_seq1	410	(GT)^7	424	Dinucleotide	Reverse: complement of AC
comp103039_c1_seq1	6	(GT)^7	20	Dinucleotide	Reverse: complement of AC
comp83506_c1_seq1	574	(GT)^6	586	Dinucleotide	Reverse: complement of AC
comp755_c0_seq1	18	(GT)^6	30	Dinucleotide	Reverse: complement of AC
comp86317_c0_seq1	1514	(AG)^9	1532	Dinucleotide	Forward
comp85080_c0_seq1	556	(CT)^6	568	Dinucleotide	Reverse: complement of AG
comp102151_c4_seq1	876	(AG)^9	894	Dinucleotide	Forward
comp100452_c0_seq1	2905	(AT)^9	2923	Dinucleotide	Forward
comp313211_c0_seq1	231	(CT)^8	247	Dinucleotide	Reverse: complement of AG
comp60072_c0_seq1	2296	(GT)^8	2312	Dinucleotide	Reverse: complement of AC
comp60072_c0_seq1	3221	(AT)^6	3233	Dinucleotide	Forward
comp29593_c0_seq1	454	(AT)^6	466	Dinucleotide	Forward
comp69797_c0_seq1	435	(GT)^6	447	Dinucleotide	Reverse: complement of AC
comp83110_c0_seq1	1428	(AT)^8	1444	Dinucleotide	Forward
comp62701_c0_seq1	849	(AT)^6	861	Dinucleotide	Forward
comp62701_c0_seq1	861	(AG)^7	875	Dinucleotide	Forward
comp85609_c1_seq1	976	(AT)^11	998	Dinucleotide	Forward
comp73818_c0_seq1	2281	(AC)^7	2295	Dinucleotide	Forward
comp94923_c0_seq1	1018	(GT)^6	1030	Dinucleotide	Reverse: complement of AC
comp282593_c0_seq1	164	(GT)^8	180	Dinucleotide	Reverse: complement of AC
comp83781_c0_seq1	1388	(CT)^8	1404	Dinucleotide	Reverse: complement of AG
comp101676_c2_seq1	2	(CT)^10	22	Dinucleotide	Reverse: complement of AG
comp56623_c0_seq1	135	(CT)^6	147	Dinucleotide	Reverse: complement of AG
comp60029_c0_seq1	416	(GT)^6	428	Dinucleotide	Reverse: complement of AC
comp30676_c0_seq1	473	(AG)^7	487	Dinucleotide	Forward
comp30676_c0_seq1	1716	(AG)^7	1730	Dinucleotide	Forward
comp68545_c0_seq1	293	(CT)^6	305	Dinucleotide	Reverse: complement of AG
comp107631_c0_seq1	977	(AG)^7	991	Dinucleotide	Forward
comp81270_c0_seq1	23	(AC)^6	35	Dinucleotide	Forward
comp23477_c0_seq1	598	(GT)^7	612	Dinucleotide	Reverse: complement of AC
comp62716_c0_seq1	1	(GT)^7	15	Dinucleotide	Reverse: complement of AC
comp37074_c0_seq1	567	(AT)^6	579	Dinucleotide	Forward
comp100181_c0_seq1	1218	(CG)^6	1230	Dinucleotide	Forward
comp94952_c0_seq1	999	(AC)^6	1011	Dinucleotide	Forward
comp94952_c0_seq1	1257	(AC)^6	1269	Dinucleotide	Forward
comp99259_c7_seq1	520	(AC)^7	534	Dinucleotide	Forward
comp73735_c0_seq1	498	(AT)^10	518	Dinucleotide	Forward
comp96586_c0_seq1	1041	(AC)^6	1053	Dinucleotide	Forward
comp92104_c0_seq1	70	(AC)^6	82	Dinucleotide	Forward
comp62905_c0_seq1	61	(AT)^9	79	Dinucleotide	Forward
comp88790_c0_seq1	801	(AT)^8	817	Dinucleotide	Forward
comp85609_c0_seq1	1326	(AT)^8	1342	Dinucleotide	Forward
comp26397_c0_seq1	12	(GT)^6	24	Dinucleotide	Reverse: complement of AC
comp100415_c1_seq1	326	(GT)^6	338	Dinucleotide	Reverse: complement of AC
comp100415_c1_seq1	522	(AT)^10	542	Dinucleotide	Forward
comp52432_c0_seq1	434	(AC)^6	446	Dinucleotide	Forward
comp69637_c0_seq1	686	(AG)^7	700	Dinucleotide	Forward
comp92215_c0_seq1	2	(AC)^6	14	Dinucleotide	Forward
comp55694_c0_seq1	164	(AC)^6	176	Dinucleotide	Forward
comp103123_c0_seq1	217	(AC)^7	231	Dinucleotide	Forward
comp252501_c0_seq1	1	(AT)^11	23	Dinucleotide	Forward
comp61284_c0_seq1	2	(AT)^9	20	Dinucleotide	Forward
comp35316_c0_seq1	10	(AC)^7	24	Dinucleotide	Forward
comp98179_c2_seq1	1276	(CT)^6	1288	Dinucleotide	Reverse: complement of AG
comp97171_c0_seq1	414	(AC)^6	426	Dinucleotide	Forward
comp100540_c0_seq1	1224	(GT)^10	1244	Dinucleotide	Reverse: complement of AC
comp51160_c0_seq1	554	(GT)^7	568	Dinucleotide	Reverse: complement of AC
comp100739_c0_seq1	4014	(AT)^6	4026	Dinucleotide	Forward
comp61266_c0_seq1	345	(CT)^6	357	Dinucleotide	Reverse: complement of AG
comp101020_c0_seq1	588	(AC)^6	600	Dinucleotide	Forward
comp101020_c0_seq1	442	(GT)^6	454	Dinucleotide	Reverse: complement of AC
comp90909_c0_seq1	715	(GT)^6	727	Dinucleotide	Reverse: complement of AC
comp448060_c0_seq1	9	(AG)^6	21	Dinucleotide	Forward
comp111338_c0_seq1	1834	(AC)^9	1852	Dinucleotide	Forward
comp111338_c0_seq1	1853	(AT)^9	1871	Dinucleotide	Forward
comp73335_c0_seq1	849	(AT)^9	867	Dinucleotide	Forward
comp85107_c0_seq1	560	(AT)^10	580	Dinucleotide	Forward
comp36493_c0_seq1	566	(AT)^7	580	Dinucleotide	Forward
comp71308_c0_seq1	2	(AT)^7	16	Dinucleotide	Forward
comp55134_c0_seq1	1308	(AT)^9	1326	Dinucleotide	Forward
comp4163_c0_seq1	283	(GT)^9	301	Dinucleotide	Reverse: complement of AC
comp102502_c4_seq1	796	(AC)^6	808	Dinucleotide	Forward
comp54294_c0_seq1	478	(AT)^6	490	Dinucleotide	Forward
comp97251_c0_seq1	1418	(AC)^6	1430	Dinucleotide	Forward
comp98261_c0_seq1	131	(AG)^7	145	Dinucleotide	Forward
comp102103_c0_seq1	2	(GT)^10	22	Dinucleotide	Reverse: complement of AC
comp86923_c0_seq1	1	(GT)^9	19	Dinucleotide	Reverse: complement of AC
comp62960_c0_seq1	2860	(CT)^9	2878	Dinucleotide	Reverse: complement of AG
comp501416_c0_seq1	534	(GT)^6	546	Dinucleotide	Reverse: complement of AC
comp103172_c2_seq1	1201	(GT)^7	1215	Dinucleotide	Reverse: complement of AC
comp103680_c2_seq1	6	(AC)^9	24	Dinucleotide	Forward
comp341145_c0_seq1	118	(AT)^6	130	Dinucleotide	Forward
comp99326_c4_seq1	7	(AG)^9	25	Dinucleotide	Forward
comp82477_c0_seq1	847	(AT)^6	859	Dinucleotide	Forward
comp3181_c0_seq1	72	(GT)^9	90	Dinucleotide	Reverse: complement of AC
comp89402_c0_seq1	442	(GT)^6	454	Dinucleotide	Reverse: complement of AC
comp74405_c0_seq1	1507	(GT)^11	1529	Dinucleotide	Reverse: complement of AC
comp74405_c0_seq1	1491	(AT)^8	1507	Dinucleotide	Forward
comp75514_c1_seq1	424	(GT)^6	436	Dinucleotide	Reverse: complement of AC
comp98362_c0_seq1	117	(GT)^9	135	Dinucleotide	Reverse: complement of AC
comp98362_c0_seq1	1107	(AC)^7	1121	Dinucleotide	Forward
comp85733_c0_seq1	528	(AT)^6	540	Dinucleotide	Forward
comp103093_c1_seq1	416	(CT)^7	430	Dinucleotide	Reverse: complement of AG
comp14305_c0_seq1	620	(AG)^7	634	Dinucleotide	Forward
comp15235_c0_seq1	431	(AG)^7	445	Dinucleotide	Forward
comp215776_c0_seq1	753	(AC)^6	765	Dinucleotide	Forward
comp80464_c0_seq1	1117	(AG)^6	1129	Dinucleotide	Forward
comp50603_c0_seq1	29	(AT)^6	41	Dinucleotide	Forward
comp309713_c0_seq1	423	(AC)^6	435	Dinucleotide	Forward
comp74039_c0_seq1	1730	(GT)^7	1744	Dinucleotide	Reverse: complement of AC
comp74039_c0_seq1	852	(GT)^6	864	Dinucleotide	Reverse: complement of AC
comp89271_c0_seq1	96	(AC)^8	112	Dinucleotide	Forward
comp48491_c0_seq1	898	(AC)^6	910	Dinucleotide	Forward
comp18202_c0_seq1	1180	(AC)^7	1194	Dinucleotide	Forward
comp95048_c0_seq1	118	(AC)^6	130	Dinucleotide	Forward
comp57500_c0_seq1	2	(GT)^11	24	Dinucleotide	Reverse: complement of AC
comp99978_c2_seq1	61	(AC)^6	73	Dinucleotide	Forward
comp771662_c0_seq1	505	(GT)^6	517	Dinucleotide	Reverse: complement of AC
comp77912_c0_seq1	1115	(AC)^8	1131	Dinucleotide	Forward
comp94141_c0_seq1	324	(CT)^6	336	Dinucleotide	Reverse: complement of AG
comp56184_c0_seq1	816	(AT)^6	828	Dinucleotide	Forward
comp55528_c0_seq1	636	(AC)^6	648	Dinucleotide	Forward
comp72781_c0_seq1	73	(AT)^6	85	Dinucleotide	Forward
comp85226_c0_seq1	67	(GT)^6	79	Dinucleotide	Reverse: complement of AC
comp32179_c0_seq1	2	(GT)^9	20	Dinucleotide	Reverse: complement of AC
comp76200_c0_seq1	15	(AC)^6	27	Dinucleotide	Forward
comp540600_c0_seq1	15	(GT)^10	35	Dinucleotide	Reverse: complement of AC
comp525208_c0_seq1	1	(AT)^6	13	Dinucleotide	Forward
comp525208_c0_seq1	551	(AT)^6	563	Dinucleotide	Forward
comp1186_c0_seq1	7	(AT)^7	21	Dinucleotide	Forward
comp23696_c0_seq1	2	(GT)^7	16	Dinucleotide	Reverse: complement of AC
comp100824_c2_seq1	1649	(GT)^9	1667	Dinucleotide	Reverse: complement of AC
comp24977_c0_seq1	1	(AC)^9	19	Dinucleotide	Forward
comp97915_c0_seq1	652	(AG)^9	670	Dinucleotide	Forward
comp72631_c0_seq1	414	(AC)^6	426	Dinucleotide	Forward
comp101013_c1_seq1	5044	(AT)^6	5056	Dinucleotide	Forward
comp45309_c0_seq1	20	(AT)^6	32	Dinucleotide	Forward
comp97922_c0_seq1	2	(AC)^10	22	Dinucleotide	Forward
comp512304_c0_seq1	513	(AT)^6	525	Dinucleotide	Forward
comp103604_c1_seq1	177	(CT)^7	191	Dinucleotide	Reverse: complement of AG
comp84670_c0_seq1	592	(AG)^7	606	Dinucleotide	Forward
comp102478_c0_seq1	1276	(AT)^6	1288	Dinucleotide	Forward
comp238296_c0_seq1	49	(AC)^7	63	Dinucleotide	Forward
comp238296_c0_seq1	66	(CT)^6	78	Dinucleotide	Reverse: complement of AG
comp92328_c0_seq1	2	(AT)^9	20	Dinucleotide	Forward
comp235932_c0_seq1	38	(AT)^7	52	Dinucleotide	Forward
comp59489_c0_seq1	206	(AC)^7	220	Dinucleotide	Forward
comp96813_c0_seq1	14	(AC)^8	30	Dinucleotide	Forward
comp83248_c0_seq1	1746	(AT)^10	1766	Dinucleotide	Forward
comp468386_c0_seq1	182	(CT)^8	198	Dinucleotide	Reverse: complement of AG
comp91352_c0_seq1	881	(CT)^9	899	Dinucleotide	Reverse: complement of AG
comp36265_c0_seq1	229	(GT)^6	241	Dinucleotide	Reverse: complement of AC
comp102744_c0_seq1	2266	(AC)^6	2278	Dinucleotide	Forward
comp80529_c0_seq1	808	(AC)^7	822	Dinucleotide	Forward
comp59773_c1_seq1	18	(AT)^10	38	Dinucleotide	Forward
comp492870_c0_seq1	1323	(GT)^6	1335	Dinucleotide	Reverse: complement of AC
comp48494_c1_seq1	759	(AT)^6	771	Dinucleotide	Forward
comp301759_c0_seq1	473	(AG)^6	485	Dinucleotide	Forward
comp60150_c0_seq1	981	(GT)^10	1001	Dinucleotide	Reverse: complement of AC
comp97143_c0_seq1	1374	(AG)^7	1388	Dinucleotide	Forward
comp70439_c0_seq1	2316	(AT)^6	2328	Dinucleotide	Forward
comp87472_c1_seq1	520	(GT)^8	536	Dinucleotide	Reverse: complement of AC
comp18285_c0_seq1	1074	(AT)^9	1092	Dinucleotide	Forward
comp88648_c1_seq1	446	(GT)^7	460	Dinucleotide	Reverse: complement of AC
comp311136_c0_seq1	33	(GT)^6	45	Dinucleotide	Reverse: complement of AC
comp89550_c1_seq1	719	(GT)^8	735	Dinucleotide	Reverse: complement of AC
comp83794_c0_seq1	1	(AG)^9	19	Dinucleotide	Forward
comp99241_c2_seq1	1617	(CT)^6	1629	Dinucleotide	Reverse: complement of AG
comp729801_c0_seq1	765	(AT)^6	777	Dinucleotide	Forward
comp97955_c3_seq1	180	(GT)^7	194	Dinucleotide	Reverse: complement of AC
comp70762_c0_seq1	1	(AC)^11	23	Dinucleotide	Forward
comp89878_c0_seq1	24	(GT)^8	40	Dinucleotide	Reverse: complement of AC
comp89878_c0_seq1	2	(CT)^11	24	Dinucleotide	Reverse: complement of AG
comp76193_c0_seq1	166	(AC)^6	178	Dinucleotide	Forward
comp104024_c0_seq1	1715	(CT)^6	1727	Dinucleotide	Reverse: complement of AG
comp90388_c0_seq1	7	(AT)^7	21	Dinucleotide	Forward
comp99697_c0_seq1	153	(CT)^7	167	Dinucleotide	Reverse: complement of AG
comp43030_c0_seq1	12	(AC)^6	24	Dinucleotide	Forward
comp95660_c4_seq1	356	(GT)^6	368	Dinucleotide	Reverse: complement of AC
comp90338_c0_seq1	665	(AT)^7	679	Dinucleotide	Forward
comp168512_c0_seq1	695	(AT)^10	715	Dinucleotide	Forward
comp77609_c0_seq1	129	(AT)^6	141	Dinucleotide	Forward
comp81480_c0_seq1	782	(AT)^6	794	Dinucleotide	Forward
comp140044_c0_seq1	765	(AG)^6	777	Dinucleotide	Forward
comp58999_c0_seq1	35	(AT)^6	47	Dinucleotide	Forward
comp58999_c0_seq1	1100	(AT)^10	1120	Dinucleotide	Forward
comp79116_c0_seq1	602	(AT)^8	618	Dinucleotide	Forward
comp101225_c5_seq1	539	(CT)^7	553	Dinucleotide	Reverse: complement of AG
comp56808_c0_seq1	3625	(GT)^6	3637	Dinucleotide	Reverse: complement of AC
comp72800_c0_seq1	3165	(AT)^6	3177	Dinucleotide	Forward
comp70860_c0_seq1	1	(AT)^8	17	Dinucleotide	Forward
comp70860_c0_seq1	661	(GT)^6	673	Dinucleotide	Reverse: complement of AC
comp103008_c0_seq1	503	(GT)^6	515	Dinucleotide	Reverse: complement of AC
comp75790_c1_seq1	566	(AC)^6	578	Dinucleotide	Forward
comp71514_c0_seq1	738	(AG)^6	750	Dinucleotide	Forward
comp100761_c3_seq1	128	(AC)^6	140	Dinucleotide	Forward
comp95285_c0_seq1	1241	(AG)^9	1259	Dinucleotide	Forward
comp58606_c0_seq1	1098	(GT)^6	1110	Dinucleotide	Reverse: complement of AC
comp72088_c1_seq1	124	(AT)^6	136	Dinucleotide	Forward
comp68148_c0_seq1	1	(AT)^11	23	Dinucleotide	Forward
comp10106_c0_seq1	686	(AT)^7	700	Dinucleotide	Forward
comp9243_c1_seq1	827	(GT)^7	841	Dinucleotide	Reverse: complement of AC
comp82899_c0_seq1	1904	(AT)^6	1916	Dinucleotide	Forward
comp99116_c0_seq1	1161	(GT)^7	1175	Dinucleotide	Reverse: complement of AC
comp31305_c0_seq1	88	(AT)^6	100	Dinucleotide	Forward
comp68465_c1_seq1	273	(AT)^7	287	Dinucleotide	Forward
comp96752_c2_seq1	490	(AC)^6	502	Dinucleotide	Forward
comp17233_c0_seq1	2	(GT)^8	18	Dinucleotide	Reverse: complement of AC
comp82495_c0_seq1	99	(GT)^7	113	Dinucleotide	Reverse: complement of AC
comp36412_c0_seq1	1	(AT)^8	17	Dinucleotide	Forward
comp773712_c0_seq1	60	(AC)^6	72	Dinucleotide	Forward
comp66547_c0_seq1	75	(AG)^8	91	Dinucleotide	Forward
comp83101_c0_seq1	2	(AG)^8	18	Dinucleotide	Forward
comp93080_c1_seq1	1110	(GT)^8	1126	Dinucleotide	Reverse: complement of AC
comp78486_c0_seq1	168	(CT)^7	182	Dinucleotide	Reverse: complement of AG
comp102808_c1_seq1	26	(AC)^8	42	Dinucleotide	Forward
comp86300_c0_seq1	57	(GT)^6	69	Dinucleotide	Reverse: complement of AC
comp63278_c0_seq1	2399	(AT)^6	2411	Dinucleotide	Forward
comp92639_c0_seq1	544	(GT)^6	556	Dinucleotide	Reverse: complement of AC
comp73009_c0_seq1	160	(GT)^7	174	Dinucleotide	Reverse: complement of AC
comp83914_c0_seq1	635	(GT)^6	647	Dinucleotide	Reverse: complement of AC
comp102044_c0_seq1	668	(AC)^6	680	Dinucleotide	Forward
comp87086_c0_seq1	230	(GT)^7	244	Dinucleotide	Reverse: complement of AC
comp316396_c0_seq1	2	(GT)^10	22	Dinucleotide	Reverse: complement of AC
comp58752_c0_seq1	1022	(GT)^6	1034	Dinucleotide	Reverse: complement of AC
comp86348_c0_seq1	204	(AC)^8	220	Dinucleotide	Forward
comp81460_c0_seq1	86	(AT)^7	100	Dinucleotide	Forward
comp46174_c0_seq1	1359	(AG)^7	1373	Dinucleotide	Forward
comp204913_c0_seq1	440	(AG)^8	456	Dinucleotide	Forward
comp84649_c1_seq1	2	(AT)^9	20	Dinucleotide	Forward
comp91196_c0_seq1	54	(AG)^7	68	Dinucleotide	Forward
comp582036_c0_seq1	482	(AC)^7	496	Dinucleotide	Forward
comp93819_c1_seq1	1617	(AT)^7	1631	Dinucleotide	Forward
comp101060_c0_seq1	1	(GT)^7	15	Dinucleotide	Reverse: complement of AC
comp15129_c0_seq1	12	(AC)^6	24	Dinucleotide	Forward
comp77647_c0_seq1	755	(AC)^6	767	Dinucleotide	Forward
comp266781_c0_seq1	491	(AG)^6	503	Dinucleotide	Forward
comp99888_c0_seq1	780	(AT)^10	800	Dinucleotide	Forward
comp91139_c1_seq1	53	(AT)^7	67	Dinucleotide	Forward
comp100440_c0_seq1	4333	(AT)^11	4355	Dinucleotide	Forward
comp84754_c0_seq1	1497	(AC)^8	1513	Dinucleotide	Forward
comp80203_c0_seq1	226	(GT)^7	240	Dinucleotide	Reverse: complement of AC
comp84877_c0_seq1	2612	(GT)^8	2628	Dinucleotide	Reverse: complement of AC
comp84877_c0_seq1	2113	(AC)^6	2125	Dinucleotide	Forward
comp637071_c0_seq1	3	(GT)^8	19	Dinucleotide	Reverse: complement of AC
comp88727_c0_seq1	62	(AG)^6	74	Dinucleotide	Forward
comp78178_c0_seq1	109	(CT)^6	121	Dinucleotide	Reverse: complement of AG
comp89069_c0_seq1	1466	(AT)^7	1480	Dinucleotide	Forward
comp6880_c0_seq1	266	(AC)^6	278	Dinucleotide	Forward
comp80773_c0_seq1	95	(AC)^7	109	Dinucleotide	Forward
comp87234_c0_seq1	814	(CT)^10	834	Dinucleotide	Reverse: complement of AG
comp48504_c1_seq1	1856	(AT)^8	1872	Dinucleotide	Forward
comp68194_c1_seq1	442	(AG)^6	454	Dinucleotide	Forward
comp57900_c0_seq1	367	(AT)^6	379	Dinucleotide	Forward
comp103327_c0_seq1	269	(AT)^6	281	Dinucleotide	Forward
comp81964_c1_seq1	52	(AT)^9	70	Dinucleotide	Forward
comp45555_c0_seq1	1415	(GT)^7	1429	Dinucleotide	Reverse: complement of AC
comp59358_c0_seq1	876	(GT)^6	888	Dinucleotide	Reverse: complement of AC
comp95516_c1_seq1	1435	(AC)^8	1451	Dinucleotide	Forward
comp93503_c0_seq1	357	(CT)^6	369	Dinucleotide	Reverse: complement of AG
comp413986_c0_seq1	1368	(AC)^7	1382	Dinucleotide	Forward
comp94003_c0_seq1	1555	(GT)^6	1567	Dinucleotide	Reverse: complement of AC
comp56438_c0_seq1	745	(AT)^7	759	Dinucleotide	Forward
comp93692_c0_seq1	1186	(GT)^6	1198	Dinucleotide	Reverse: complement of AC
comp63032_c0_seq1	1	(GT)^6	13	Dinucleotide	Reverse: complement of AC
comp94249_c3_seq1	66	(AT)^8	82	Dinucleotide	Forward
comp83190_c1_seq1	2	(AT)^10	22	Dinucleotide	Forward
comp103080_c1_seq1	1533	(GT)^7	1547	Dinucleotide	Reverse: complement of AC
comp75279_c0_seq1	964	(AT)^6	976	Dinucleotide	Forward
comp100503_c0_seq1	247	(AC)^8	263	Dinucleotide	Forward
comp88783_c0_seq1	1	(GT)^9	19	Dinucleotide	Reverse: complement of AC
comp582410_c0_seq1	274	(GT)^7	288	Dinucleotide	Reverse: complement of AC
comp17919_c0_seq1	917	(AG)^7	931	Dinucleotide	Forward
comp565386_c0_seq1	1	(GT)^7	15	Dinucleotide	Reverse: complement of AC
comp103712_c1_seq1	65	(AT)^7	79	Dinucleotide	Forward
comp103731_c1_seq1	1	(GT)^8	17	Dinucleotide	Reverse: complement of AC
comp100793_c0_seq1	243	(CT)^7	257	Dinucleotide	Reverse: complement of AG
comp101274_c1_seq1	565	(AC)^7	579	Dinucleotide	Forward
comp141066_c0_seq1	1149	(AT)^8	1165	Dinucleotide	Forward
comp355013_c0_seq1	268	(AC)^7	282	Dinucleotide	Forward
comp88661_c0_seq1	1	(AT)^9	19	Dinucleotide	Forward
comp100914_c4_seq1	242	(GT)^8	258	Dinucleotide	Reverse: complement of AC
comp96382_c0_seq1	385	(GT)^7	399	Dinucleotide	Reverse: complement of AC
comp100983_c1_seq1	821	(GT)^8	837	Dinucleotide	Reverse: complement of AC
comp81421_c2_seq1	1205	(AT)^8	1221	Dinucleotide	Forward
comp100936_c0_seq1	921	(AC)^8	937	Dinucleotide	Forward
comp77414_c1_seq1	897	(AC)^6	909	Dinucleotide	Forward
comp77414_c1_seq1	913	(AC)^6	925	Dinucleotide	Forward
comp103281_c2_seq1	1621	(CT)^6	1633	Dinucleotide	Reverse: complement of AG
comp97256_c2_seq1	819	(AC)^6	831	Dinucleotide	Forward
comp700397_c0_seq1	375	(AG)^7	389	Dinucleotide	Forward
comp81329_c1_seq1	395	(AC)^9	413	Dinucleotide	Forward
comp74371_c0_seq1	311	(AC)^6	323	Dinucleotide	Forward
comp92647_c0_seq1	446	(AT)^7	460	Dinucleotide	Forward
comp90024_c0_seq1	2	(GT)^10	22	Dinucleotide	Reverse: complement of AC
comp69508_c0_seq1	2	(AG)^11	24	Dinucleotide	Forward
comp103241_c0_seq1	632	(AC)^6	644	Dinucleotide	Forward
comp271087_c0_seq1	484	(AC)^9	502	Dinucleotide	Forward
comp38160_c0_seq1	601	(GT)^8	617	Dinucleotide	Reverse: complement of AC
comp81309_c0_seq1	88	(GT)^7	102	Dinucleotide	Reverse: complement of AC
comp101429_c0_seq1	51	(AC)^6	63	Dinucleotide	Forward
comp101119_c0_seq1	469	(GT)^6	481	Dinucleotide	Reverse: complement of AC
comp272854_c0_seq1	445	(GT)^6	457	Dinucleotide	Reverse: complement of AC
comp89780_c0_seq1	400	(AG)^6	412	Dinucleotide	Forward
comp82768_c0_seq1	13	(AT)^6	25	Dinucleotide	Forward
comp82768_c0_seq1	35	(GT)^7	49	Dinucleotide	Reverse: complement of AC
comp51822_c0_seq1	1	(AT)^9	19	Dinucleotide	Forward
comp92197_c0_seq1	1	(AG)^10	21	Dinucleotide	Forward
comp20344_c0_seq1	72	(GT)^7	86	Dinucleotide	Reverse: complement of AC
comp98858_c0_seq1	2	(AC)^9	20	Dinucleotide	Forward
comp100464_c3_seq1	262	(GT)^6	274	Dinucleotide	Reverse: complement of AC
comp55856_c0_seq1	2	(AC)^8	18	Dinucleotide	Forward
comp55856_c0_seq1	28	(AC)^6	40	Dinucleotide	Forward
comp72430_c0_seq1	635	(AT)^8	651	Dinucleotide	Forward
comp3155_c0_seq1	441	(AT)^6	453	Dinucleotide	Forward
comp99383_c0_seq1	4455	(GT)^6	4467	Dinucleotide	Reverse: complement of AC
comp100335_c7_seq1	2	(AT)^8	18	Dinucleotide	Forward
comp56711_c1_seq1	419	(GT)^6	431	Dinucleotide	Reverse: complement of AC
comp103241_c2_seq1	517	(GT)^9	535	Dinucleotide	Reverse: complement of AC
comp80728_c0_seq1	637	(AC)^6	649	Dinucleotide	Forward
comp51797_c0_seq1	1	(AG)^10	21	Dinucleotide	Forward
comp100414_c1_seq1	655	(AT)^6	667	Dinucleotide	Forward
comp16353_c0_seq1	271	(AC)^6	283	Dinucleotide	Forward
comp83503_c2_seq1	510	(AT)^6	522	Dinucleotide	Forward
comp17262_c0_seq1	891	(GT)^6	903	Dinucleotide	Reverse: complement of AC
comp17262_c0_seq1	824	(CT)^6	836	Dinucleotide	Reverse: complement of AG
comp84649_c0_seq1	2752	(AC)^6	2764	Dinucleotide	Forward
comp102522_c2_seq1	9	(AC)^7	23	Dinucleotide	Forward
comp93081_c0_seq1	477	(AT)^6	489	Dinucleotide	Forward
comp68358_c0_seq1	1774	(AT)^9	1792	Dinucleotide	Forward
comp54389_c0_seq1	232	(AC)^6	244	Dinucleotide	Forward
comp98101_c2_seq1	1	(GT)^10	21	Dinucleotide	Reverse: complement of AC
comp85633_c0_seq1	21	(AT)^7	35	Dinucleotide	Forward
comp79882_c0_seq1	464	(AT)^7	478	Dinucleotide	Forward
comp45519_c0_seq1	3178	(GT)^7	3192	Dinucleotide	Reverse: complement of AC
comp102679_c0_seq1	653	(AT)^6	665	Dinucleotide	Forward
comp5844_c0_seq1	368	(AC)^6	380	Dinucleotide	Forward
comp30732_c0_seq1	8	(GT)^7	22	Dinucleotide	Reverse: complement of AC
comp72975_c0_seq1	351	(AC)^6	363	Dinucleotide	Forward
comp81702_c0_seq1	11	(GT)^7	25	Dinucleotide	Reverse: complement of AC
comp101834_c0_seq1	552	(AT)^8	568	Dinucleotide	Forward
comp100855_c5_seq1	472	(AG)^7	486	Dinucleotide	Forward
comp100006_c0_seq1	215	(AC)^6	227	Dinucleotide	Forward
comp72301_c0_seq1	296	(AG)^6	308	Dinucleotide	Forward
comp101477_c1_seq1	1609	(GT)^7	1623	Dinucleotide	Reverse: complement of AC
comp101477_c1_seq1	538	(AG)^8	554	Dinucleotide	Forward
comp100075_c0_seq1	3437	(AT)^9	3455	Dinucleotide	Forward
comp96747_c1_seq1	264	(AT)^7	278	Dinucleotide	Forward
comp101109_c0_seq1	546	(AC)^6	558	Dinucleotide	Forward
comp95069_c0_seq1	4293	(AT)^6	4305	Dinucleotide	Forward
comp120950_c0_seq1	1884	(AC)^9	1902	Dinucleotide	Forward
comp34011_c0_seq1	383	(AC)^6	395	Dinucleotide	Forward
comp29264_c0_seq1	618	(AT)^6	630	Dinucleotide	Forward
comp103422_c0_seq1	19	(AT)^6	31	Dinucleotide	Forward
comp93490_c1_seq1	450	(GT)^6	462	Dinucleotide	Reverse: complement of AC
comp450119_c0_seq1	289	(AC)^6	301	Dinucleotide	Forward
comp58589_c0_seq1	1391	(AT)^9	1409	Dinucleotide	Forward
comp96845_c0_seq1	2278	(AC)^11	2300	Dinucleotide	Forward
comp61413_c0_seq1	534	(AC)^6	546	Dinucleotide	Forward
comp582587_c0_seq1	7	(AT)^7	21	Dinucleotide	Forward
comp100695_c3_seq1	45	(AC)^6	57	Dinucleotide	Forward
comp58199_c0_seq1	1469	(AG)^6	1481	Dinucleotide	Forward
comp699340_c0_seq1	568	(AC)^7	582	Dinucleotide	Forward
comp94968_c1_seq1	11	(AT)^7	25	Dinucleotide	Forward
comp71680_c0_seq1	11	(GT)^6	23	Dinucleotide	Reverse: complement of AC
comp98865_c2_seq1	2	(AC)^10	22	Dinucleotide	Forward
comp102207_c2_seq1	14	(GT)^8	30	Dinucleotide	Reverse: complement of AC
comp80155_c0_seq1	170	(AC)^6	182	Dinucleotide	Forward
comp90511_c2_seq1	693	(AT)^6	705	Dinucleotide	Forward
comp95669_c0_seq1	417	(GT)^6	429	Dinucleotide	Reverse: complement of AC
comp95467_c0_seq1	633	(AG)^6	645	Dinucleotide	Forward
comp99122_c1_seq1	2009	(AC)^6	2021	Dinucleotide	Forward
comp369571_c0_seq1	219	(AT)^7	233	Dinucleotide	Forward
comp88249_c0_seq1	2	(AT)^11	24	Dinucleotide	Forward
comp109067_c0_seq1	87	(AT)^8	103	Dinucleotide	Forward
comp92541_c0_seq1	54	(AC)^6	66	Dinucleotide	Forward
comp102808_c0_seq1	1958	(AC)^8	1974	Dinucleotide	Forward
comp24069_c1_seq1	5	(AT)^9	23	Dinucleotide	Forward
comp22839_c0_seq1	110	(AC)^7	124	Dinucleotide	Forward
comp64071_c0_seq1	1	(AT)^11	23	Dinucleotide	Forward
comp96681_c1_seq1	683	(GT)^6	695	Dinucleotide	Reverse: complement of AC
comp70540_c0_seq1	293	(CT)^6	305	Dinucleotide	Reverse: complement of AG
comp77263_c0_seq1	578	(AC)^6	590	Dinucleotide	Forward
comp4004_c0_seq1	13	(GT)^6	25	Dinucleotide	Reverse: complement of AC
comp101087_c4_seq1	2084	(AC)^7	2098	Dinucleotide	Forward
comp86758_c0_seq1	112	(AG)^6	124	Dinucleotide	Forward
comp19218_c0_seq1	2	(AT)^9	20	Dinucleotide	Forward
comp66515_c0_seq1	642	(CT)^6	654	Dinucleotide	Reverse: complement of AG
comp101875_c0_seq1	389	(CT)^6	401	Dinucleotide	Reverse: complement of AG
comp99652_c0_seq1	2	(AT)^9	20	Dinucleotide	Forward
comp197329_c0_seq1	43	(GT)^6	55	Dinucleotide	Reverse: complement of AC
comp94805_c1_seq1	655	(AT)^7	669	Dinucleotide	Forward
comp86679_c0_seq1	1437	(AT)^9	1455	Dinucleotide	Forward
comp83596_c0_seq1	513	(AT)^7	527	Dinucleotide	Forward
comp78341_c0_seq1	972	(CT)^6	984	Dinucleotide	Reverse: complement of AG
comp101190_c0_seq1	1	(AT)^10	21	Dinucleotide	Forward
comp101190_c0_seq1	25	(AT)^7	39	Dinucleotide	Forward
comp102002_c0_seq1	201	(AT)^7	215	Dinucleotide	Forward
comp100297_c0_seq1	1304	(GT)^7	1318	Dinucleotide	Reverse: complement of AC
comp89665_c0_seq1	682	(AC)^6	694	Dinucleotide	Forward
comp64687_c0_seq1	798	(AC)^7	812	Dinucleotide	Forward
comp87395_c0_seq1	10	(AC)^7	24	Dinucleotide	Forward
comp35734_c0_seq1	494	(AC)^9	512	Dinucleotide	Forward
comp92842_c0_seq1	1	(AT)^7	15	Dinucleotide	Forward
comp247360_c0_seq1	968	(AT)^9	986	Dinucleotide	Forward
comp76268_c1_seq1	524	(AG)^10	544	Dinucleotide	Forward
comp104415_c0_seq1	502	(AG)^7	516	Dinucleotide	Forward
comp104032_c0_seq1	613	(AT)^6	625	Dinucleotide	Forward
comp348728_c0_seq1	1955	(AC)^10	1975	Dinucleotide	Forward
comp73076_c0_seq1	39	(AT)^6	51	Dinucleotide	Forward
comp91974_c0_seq1	820	(AG)^7	834	Dinucleotide	Forward
comp81073_c0_seq1	9	(AT)^7	23	Dinucleotide	Forward
comp194343_c0_seq1	487	(AT)^11	509	Dinucleotide	Forward
comp74039_c1_seq1	288	(AC)^6	300	Dinucleotide	Forward
comp32272_c0_seq1	1732	(GT)^11	1754	Dinucleotide	Reverse: complement of AC
comp620_c0_seq1	710	(CT)^10	730	Dinucleotide	Reverse: complement of AG
comp84067_c1_seq1	1	(AC)^7	15	Dinucleotide	Forward
comp18560_c0_seq1	1398	(GT)^6	1410	Dinucleotide	Reverse: complement of AC
comp68395_c0_seq1	321	(CT)^6	333	Dinucleotide	Reverse: complement of AG
comp56844_c1_seq1	2	(AG)^7	16	Dinucleotide	Forward
comp41604_c0_seq1	1250	(AC)^7	1264	Dinucleotide	Forward
comp102262_c0_seq1	2	(AC)^8	18	Dinucleotide	Forward
comp99538_c2_seq1	505	(GT)^11	527	Dinucleotide	Reverse: complement of AC
comp70074_c0_seq1	336	(GT)^6	348	Dinucleotide	Reverse: complement of AC
comp512489_c0_seq1	1	(AT)^9	19	Dinucleotide	Forward
comp81584_c1_seq1	551	(AC)^6	563	Dinucleotide	Forward
comp95698_c2_seq1	2	(CT)^11	24	Dinucleotide	Reverse: complement of AG
comp103465_c0_seq1	721	(AT)^6	733	Dinucleotide	Forward
comp62032_c0_seq1	248	(AC)^9	266	Dinucleotide	Forward
comp61915_c0_seq1	800	(GT)^6	812	Dinucleotide	Reverse: complement of AC
comp73386_c0_seq1	163	(AT)^7	177	Dinucleotide	Forward
comp21353_c0_seq1	121	(AC)^6	133	Dinucleotide	Forward
comp21353_c0_seq1	86	(GT)^6	98	Dinucleotide	Reverse: complement of AC
comp73808_c1_seq1	152	(GT)^6	164	Dinucleotide	Reverse: complement of AC
comp17483_c0_seq1	728	(AT)^7	742	Dinucleotide	Forward
comp297783_c0_seq1	673	(AC)^6	685	Dinucleotide	Forward
comp54756_c0_seq1	34	(AT)^8	50	Dinucleotide	Forward
comp54756_c0_seq1	220	(AC)^7	234	Dinucleotide	Forward
comp73028_c0_seq1	892	(AC)^8	908	Dinucleotide	Forward
comp71298_c0_seq1	521	(CT)^7	535	Dinucleotide	Reverse: complement of AG
comp75676_c0_seq1	481	(CT)^7	495	Dinucleotide	Reverse: complement of AG
comp102577_c1_seq1	1	(AC)^8	17	Dinucleotide	Forward
comp2442_c0_seq1	507	(GT)^6	519	Dinucleotide	Reverse: complement of AC
comp99911_c0_seq1	2	(AC)^10	22	Dinucleotide	Forward
comp95480_c0_seq1	371	(AC)^9	389	Dinucleotide	Forward
comp95206_c1_seq1	169	(AT)^8	185	Dinucleotide	Forward
comp93192_c0_seq1	1655	(AT)^6	1667	Dinucleotide	Forward
comp1215908_c0_seq1	528	(CT)^8	544	Dinucleotide	Reverse: complement of AG
comp1215908_c0_seq1	216	(GT)^7	230	Dinucleotide	Reverse: complement of AC
comp59358_c1_seq1	1542	(AC)^7	1556	Dinucleotide	Forward
comp89021_c0_seq1	51	(GT)^6	63	Dinucleotide	Reverse: complement of AC
comp80973_c0_seq1	970	(CT)^6	982	Dinucleotide	Reverse: complement of AG
comp55298_c0_seq1	5	(AT)^9	23	Dinucleotide	Forward
comp72685_c0_seq1	1367	(AT)^6	1379	Dinucleotide	Forward
comp102075_c1_seq1	867	(AC)^6	879	Dinucleotide	Forward
comp77435_c0_seq1	847	(AC)^8	863	Dinucleotide	Forward
comp24706_c0_seq1	150	(AC)^6	162	Dinucleotide	Forward
comp103356_c0_seq1	238	(AT)^8	254	Dinucleotide	Forward
comp99450_c0_seq1	1	(AT)^10	21	Dinucleotide	Forward
comp1937_c0_seq1	525	(AC)^6	537	Dinucleotide	Forward
comp76867_c0_seq1	2	(AG)^7	16	Dinucleotide	Forward
comp54624_c0_seq1	286	(GT)^7	300	Dinucleotide	Reverse: complement of AC
comp101580_c0_seq1	312	(AC)^9	330	Dinucleotide	Forward
comp34936_c0_seq1	2	(AT)^9	20	Dinucleotide	Forward
comp86331_c0_seq1	47	(AT)^8	63	Dinucleotide	Forward
comp101634_c0_seq1	2	(AT)^9	20	Dinucleotide	Forward
comp82553_c0_seq1	254	(AC)^7	268	Dinucleotide	Forward
comp504251_c0_seq1	486	(GT)^6	498	Dinucleotide	Reverse: complement of AC
comp105553_c0_seq1	95	(CT)^6	107	Dinucleotide	Reverse: complement of AG
comp57371_c0_seq1	662	(AC)^11	684	Dinucleotide	Forward
comp26056_c0_seq1	3910	(AG)^6	3922	Dinucleotide	Forward
comp97335_c1_seq1	664	(AC)^6	676	Dinucleotide	Forward
comp82318_c3_seq1	565	(AC)^8	581	Dinucleotide	Forward
comp92714_c3_seq1	5	(AC)^8	21	Dinucleotide	Forward
comp89737_c1_seq1	1132	(AC)^6	1144	Dinucleotide	Forward
comp56638_c0_seq1	516	(GT)^6	528	Dinucleotide	Reverse: complement of AC
comp56638_c0_seq1	416	(AT)^6	428	Dinucleotide	Forward
comp66001_c0_seq1	2100	(CT)^8	2116	Dinucleotide	Reverse: complement of AG
comp103451_c2_seq1	739	(AC)^6	751	Dinucleotide	Forward
comp74783_c0_seq1	129	(GT)^6	141	Dinucleotide	Reverse: complement of AC
comp92085_c0_seq1	22	(GT)^10	42	Dinucleotide	Reverse: complement of AC
comp92085_c0_seq1	2	(GT)^9	20	Dinucleotide	Reverse: complement of AC
comp102629_c1_seq1	395	(GT)^8	411	Dinucleotide	Reverse: complement of AC
comp81434_c0_seq1	466	(AC)^6	478	Dinucleotide	Forward
comp93904_c0_seq1	89	(GT)^6	101	Dinucleotide	Reverse: complement of AC
comp101790_c1_seq1	1	(GT)^10	21	Dinucleotide	Reverse: complement of AC
comp35539_c0_seq1	495	(AT)^10	515	Dinucleotide	Forward
comp92883_c2_seq1	250	(AC)^6	262	Dinucleotide	Forward
comp70753_c0_seq1	349	(AC)^7	363	Dinucleotide	Forward
comp76936_c0_seq1	644	(GT)^6	656	Dinucleotide	Reverse: complement of AC
comp101296_c1_seq1	1032	(GT)^8	1048	Dinucleotide	Reverse: complement of AC
comp101296_c1_seq1	1016	(GT)^6	1028	Dinucleotide	Reverse: complement of AC
comp101296_c1_seq1	946	(CG)^6	958	Dinucleotide	Forward
comp35759_c1_seq1	565	(CT)^6	577	Dinucleotide	Reverse: complement of AG
comp24537_c0_seq1	89	(AC)^9	107	Dinucleotide	Forward
comp106343_c0_seq1	1255	(AG)^7	1269	Dinucleotide	Forward
comp86236_c0_seq1	8	(GT)^7	22	Dinucleotide	Reverse: complement of AC
comp172095_c0_seq1	1034	(AT)^6	1046	Dinucleotide	Forward
comp95591_c0_seq1	209	(AG)^6	221	Dinucleotide	Forward
comp133847_c0_seq1	1195	(AT)^9	1213	Dinucleotide	Forward
comp259102_c0_seq1	28	(CT)^7	42	Dinucleotide	Reverse: complement of AG
comp2233_c0_seq1	1	(GT)^7	15	Dinucleotide	Reverse: complement of AC
comp126102_c0_seq1	1205	(AC)^6	1217	Dinucleotide	Forward
comp101791_c0_seq1	1498	(GT)^7	1512	Dinucleotide	Reverse: complement of AC
comp379481_c0_seq1	370	(AC)^8	386	Dinucleotide	Forward
comp70429_c0_seq1	107	(CT)^6	119	Dinucleotide	Reverse: complement of AG
comp560963_c0_seq1	511	(GT)^7	525	Dinucleotide	Reverse: complement of AC
comp258346_c0_seq1	800	(AC)^8	816	Dinucleotide	Forward
comp75923_c1_seq1	703	(GT)^7	717	Dinucleotide	Reverse: complement of AC
comp97247_c0_seq1	1	(AT)^6	13	Dinucleotide	Forward
comp87936_c1_seq1	54	(GT)^6	66	Dinucleotide	Reverse: complement of AC
comp98585_c3_seq1	1369	(AG)^8	1385	Dinucleotide	Forward
comp146801_c0_seq1	534	(AG)^8	550	Dinucleotide	Forward
comp99132_c0_seq1	6	(AT)^6	18	Dinucleotide	Forward
comp78678_c1_seq1	579	(AT)^9	597	Dinucleotide	Forward
comp47340_c0_seq1	597	(AG)^6	609	Dinucleotide	Forward
comp69218_c0_seq1	1354	(AC)^8	1370	Dinucleotide	Forward
comp80851_c0_seq1	208	(CT)^6	220	Dinucleotide	Reverse: complement of AG
comp85082_c0_seq1	1689	(GT)^6	1701	Dinucleotide	Reverse: complement of AC
comp770_c0_seq1	513	(AC)^7	527	Dinucleotide	Forward
comp120352_c0_seq1	279	(AC)^8	295	Dinucleotide	Forward
comp655651_c0_seq1	398	(AT)^6	410	Dinucleotide	Forward
comp104304_c0_seq1	641	(AT)^6	653	Dinucleotide	Forward
comp100651_c0_seq1	862	(AC)^8	878	Dinucleotide	Forward
comp81588_c0_seq1	38	(AG)^8	54	Dinucleotide	Forward
comp67427_c0_seq1	656	(AT)^6	668	Dinucleotide	Forward
comp80919_c0_seq1	252	(AT)^6	264	Dinucleotide	Forward
comp91615_c0_seq1	317	(AT)^6	329	Dinucleotide	Forward
comp96438_c0_seq1	1825	(GT)^6	1837	Dinucleotide	Reverse: complement of AC
comp2400_c0_seq1	129	(AC)^6	141	Dinucleotide	Forward
comp632299_c0_seq1	6	(AT)^6	18	Dinucleotide	Forward
comp632299_c0_seq1	104	(AC)^6	116	Dinucleotide	Forward
comp101346_c1_seq1	21	(AT)^10	41	Dinucleotide	Forward
comp99059_c0_seq1	553	(AT)^7	567	Dinucleotide	Forward
comp82873_c0_seq1	63	(GT)^10	83	Dinucleotide	Reverse: complement of AC
comp87599_c0_seq1	182	(AG)^7	196	Dinucleotide	Forward
comp81440_c0_seq1	4	(GT)^6	16	Dinucleotide	Reverse: complement of AC
comp68086_c0_seq1	1798	(AT)^6	1810	Dinucleotide	Forward
comp97870_c0_seq1	1650	(AT)^10	1670	Dinucleotide	Forward
comp86993_c0_seq1	762	(AC)^6	774	Dinucleotide	Forward
comp635374_c0_seq1	181	(AG)^7	195	Dinucleotide	Forward
comp91558_c0_seq1	537	(AT)^10	557	Dinucleotide	Forward
comp101491_c2_seq1	2159	(AT)^9	2177	Dinucleotide	Forward
comp100914_c1_seq1	914	(AT)^10	934	Dinucleotide	Forward
comp58377_c0_seq1	1111	(CT)^6	1123	Dinucleotide	Reverse: complement of AG
comp71951_c0_seq1	11	(AT)^6	23	Dinucleotide	Forward
comp98325_c2_seq1	906	(AC)^6	918	Dinucleotide	Forward
comp103023_c0_seq1	2293	(GT)^6	2305	Dinucleotide	Reverse: complement of AC
comp103023_c0_seq1	2270	(GT)^8	2286	Dinucleotide	Reverse: complement of AC
comp98078_c1_seq1	645	(AC)^6	657	Dinucleotide	Forward
comp77474_c0_seq1	451	(CT)^6	463	Dinucleotide	Reverse: complement of AG
comp98754_c1_seq1	525	(AC)^10	545	Dinucleotide	Forward
comp95556_c0_seq1	551	(AC)^10	571	Dinucleotide	Forward
comp45264_c0_seq1	157	(AG)^6	169	Dinucleotide	Forward
comp25485_c0_seq1	447	(AT)^7	461	Dinucleotide	Forward
comp103346_c2_seq1	13	(AT)^6	25	Dinucleotide	Forward
comp88150_c0_seq1	554	(GT)^6	566	Dinucleotide	Reverse: complement of AC
comp40815_c0_seq1	1	(AT)^10	21	Dinucleotide	Forward
comp43632_c0_seq1	1169	(AT)^10	1189	Dinucleotide	Forward
comp988547_c0_seq1	589	(GT)^8	605	Dinucleotide	Reverse: complement of AC
comp90820_c0_seq1	1	(AG)^10	21	Dinucleotide	Forward
comp77375_c0_seq1	1133	(AG)^6	1145	Dinucleotide	Forward
comp347436_c0_seq1	18	(AT)^6	30	Dinucleotide	Forward
comp279864_c0_seq1	56	(GT)^8	72	Dinucleotide	Reverse: complement of AC
comp70136_c0_seq1	668	(AT)^6	680	Dinucleotide	Forward
comp14546_c0_seq1	300	(AT)^6	312	Dinucleotide	Forward
comp72804_c0_seq1	70	(AG)^6	82	Dinucleotide	Forward
comp92787_c0_seq1	2676	(AC)^9	2694	Dinucleotide	Forward
comp86578_c0_seq1	2	(AG)^10	22	Dinucleotide	Forward
comp86578_c0_seq1	2190	(AC)^6	2202	Dinucleotide	Forward
comp73019_c0_seq1	1113	(GT)^6	1125	Dinucleotide	Reverse: complement of AC
comp100968_c1_seq1	2	(GT)^11	24	Dinucleotide	Reverse: complement of AC
comp83930_c1_seq1	2	(AG)^10	22	Dinucleotide	Forward
comp93069_c0_seq1	2069	(CT)^7	2083	Dinucleotide	Reverse: complement of AG
comp104479_c0_seq1	27	(AG)^7	41	Dinucleotide	Forward
comp894239_c0_seq1	642	(AC)^6	654	Dinucleotide	Forward
comp94226_c0_seq1	958	(AC)^6	970	Dinucleotide	Forward
comp103078_c0_seq1	9	(AT)^7	23	Dinucleotide	Forward
comp322728_c0_seq1	319	(AC)^6	331	Dinucleotide	Forward
comp80759_c0_seq1	706	(AC)^6	718	Dinucleotide	Forward
comp93053_c0_seq1	1	(AT)^10	21	Dinucleotide	Forward
comp103417_c1_seq1	441	(AC)^6	453	Dinucleotide	Forward
comp81386_c1_seq1	576	(AT)^6	588	Dinucleotide	Forward
comp257627_c0_seq1	2	(AT)^8	18	Dinucleotide	Forward
comp21005_c0_seq1	1417	(GT)^7	1431	Dinucleotide	Reverse: complement of AC
comp56388_c0_seq1	1268	(GT)^6	1280	Dinucleotide	Reverse: complement of AC
comp40104_c0_seq1	5	(AC)^6	17	Dinucleotide	Forward
comp97458_c0_seq1	42	(AC)^7	56	Dinucleotide	Forward
comp81835_c2_seq1	904	(GT)^8	920	Dinucleotide	Reverse: complement of AC
comp102250_c0_seq1	10	(AC)^7	24	Dinucleotide	Forward
comp76625_c1_seq1	1	(AT)^11	23	Dinucleotide	Forward
comp27748_c0_seq1	67	(AG)^6	79	Dinucleotide	Forward
comp99002_c0_seq1	1346	(GT)^8	1362	Dinucleotide	Reverse: complement of AC
comp25852_c0_seq1	891	(AT)^7	905	Dinucleotide	Forward
comp77163_c0_seq1	694	(GT)^8	710	Dinucleotide	Reverse: complement of AC
comp81690_c0_seq1	798	(AT)^10	818	Dinucleotide	Forward
comp94131_c1_seq1	304	(AC)^6	316	Dinucleotide	Forward
comp94131_c1_seq1	621	(AT)^7	635	Dinucleotide	Forward
comp282020_c0_seq1	659	(GT)^6	671	Dinucleotide	Reverse: complement of AC
comp93077_c0_seq1	265	(AT)^6	277	Dinucleotide	Forward
comp82473_c0_seq1	1397	(AT)^10	1417	Dinucleotide	Forward
comp568848_c0_seq1	105	(GT)^7	119	Dinucleotide	Reverse: complement of AC
comp86346_c1_seq1	60	(CT)^9	78	Dinucleotide	Reverse: complement of AG
comp68430_c0_seq1	246	(AC)^7	260	Dinucleotide	Forward
comp101433_c0_seq1	2625	(GT)^8	2641	Dinucleotide	Reverse: complement of AC
comp99977_c1_seq1	3653	(GT)^6	3665	Dinucleotide	Reverse: complement of AC
comp92065_c0_seq1	70	(CT)^7	84	Dinucleotide	Reverse: complement of AG
comp92394_c1_seq1	1	(GT)^9	19	Dinucleotide	Reverse: complement of AC
comp25505_c0_seq1	1276	(AC)^6	1288	Dinucleotide	Forward
comp23956_c0_seq1	84	(AC)^6	96	Dinucleotide	Forward
comp98184_c0_seq1	609	(GT)^6	621	Dinucleotide	Reverse: complement of AC
comp15358_c0_seq1	2	(AG)^10	22	Dinucleotide	Forward
comp94021_c0_seq1	2	(AG)^10	22	Dinucleotide	Forward
comp89217_c0_seq1	2	(AT)^9	20	Dinucleotide	Forward
comp89217_c0_seq1	1265	(GT)^9	1283	Dinucleotide	Reverse: complement of AC
comp86236_c3_seq1	2	(AC)^7	16	Dinucleotide	Forward
comp88604_c0_seq1	1328	(GT)^9	1346	Dinucleotide	Reverse: complement of AC
comp81329_c0_seq1	7	(AC)^8	23	Dinucleotide	Forward
comp103711_c5_seq1	302	(AC)^9	320	Dinucleotide	Forward
comp99743_c0_seq1	1	(GT)^9	19	Dinucleotide	Reverse: complement of AC
comp83073_c0_seq1	2307	(AT)^11	2329	Dinucleotide	Forward
comp87927_c1_seq1	1	(AT)^10	21	Dinucleotide	Forward
comp92515_c0_seq1	650	(AC)^10	670	Dinucleotide	Forward
comp72659_c0_seq1	1	(AT)^8	17	Dinucleotide	Forward
comp70363_c1_seq1	115	(CT)^8	131	Dinucleotide	Reverse: complement of AG
comp75827_c0_seq1	2	(AT)^10	22	Dinucleotide	Forward
comp75827_c0_seq1	840	(AT)^6	852	Dinucleotide	Forward
comp410164_c0_seq1	482	(AT)^6	494	Dinucleotide	Forward
comp69677_c0_seq1	92	(GT)^9	110	Dinucleotide	Reverse: complement of AC
comp467950_c0_seq1	64	(AG)^6	76	Dinucleotide	Forward
comp177372_c0_seq1	175	(AC)^6	187	Dinucleotide	Forward
comp103208_c1_seq1	723	(AT)^7	737	Dinucleotide	Forward
comp765569_c0_seq1	284	(AC)^7	298	Dinucleotide	Forward
comp73605_c0_seq1	106	(CT)^7	120	Dinucleotide	Reverse: complement of AG
comp98607_c0_seq1	894	(AG)^8	910	Dinucleotide	Forward
comp175654_c0_seq1	542	(GT)^7	556	Dinucleotide	Reverse: complement of AC
comp87080_c0_seq1	2	(AT)^6	14	Dinucleotide	Forward
comp101717_c0_seq1	3722	(GT)^11	3744	Dinucleotide	Reverse: complement of AC
comp101717_c0_seq1	3708	(AC)^6	3720	Dinucleotide	Forward
comp67533_c0_seq1	633	(AG)^9	651	Dinucleotide	Forward
comp55013_c0_seq1	2090	(AT)^11	2112	Dinucleotide	Forward
comp72642_c0_seq1	310	(AT)^6	322	Dinucleotide	Forward
comp657981_c0_seq1	390	(GT)^6	402	Dinucleotide	Reverse: complement of AC
comp70651_c0_seq1	1594	(AG)^6	1606	Dinucleotide	Forward
comp28209_c0_seq1	180	(GT)^7	194	Dinucleotide	Reverse: complement of AC
comp246896_c0_seq1	889	(AT)^9	907	Dinucleotide	Forward
comp60722_c0_seq1	2909	(AT)^6	2921	Dinucleotide	Forward
comp85067_c0_seq1	342	(CG)^6	354	Dinucleotide	Forward
comp540210_c0_seq1	666	(AT)^6	678	Dinucleotide	Forward
comp32796_c0_seq1	421	(AT)^6	433	Dinucleotide	Forward
comp88248_c0_seq1	2631	(GT)^6	2643	Dinucleotide	Reverse: complement of AC
comp91597_c0_seq1	1513	(CT)^6	1525	Dinucleotide	Reverse: complement of AG
comp94755_c2_seq1	1368	(AT)^7	1382	Dinucleotide	Forward
comp69713_c0_seq1	2	(AC)^10	22	Dinucleotide	Forward
comp31139_c0_seq1	635	(AT)^9	653	Dinucleotide	Forward
comp79895_c1_seq1	1	(AT)^11	23	Dinucleotide	Forward
comp93249_c0_seq1	60	(AC)^6	72	Dinucleotide	Forward
comp102449_c0_seq1	1746	(AT)^6	1758	Dinucleotide	Forward
comp98886_c2_seq1	650	(GT)^7	664	Dinucleotide	Reverse: complement of AC
comp86236_c4_seq1	778	(AT)^10	798	Dinucleotide	Forward
comp76170_c0_seq1	98	(AC)^6	110	Dinucleotide	Forward
comp98805_c0_seq1	2076	(AT)^9	2094	Dinucleotide	Forward
comp104663_c0_seq1	200	(AT)^7	214	Dinucleotide	Forward
comp98944_c0_seq1	610	(AG)^7	624	Dinucleotide	Forward
comp48381_c0_seq1	235	(GT)^6	247	Dinucleotide	Reverse: complement of AC
comp34041_c0_seq1	80	(AC)^7	94	Dinucleotide	Forward
comp81934_c0_seq1	1556	(GT)^6	1568	Dinucleotide	Reverse: complement of AC
comp70989_c1_seq1	1014	(AT)^8	1030	Dinucleotide	Forward
comp69842_c0_seq1	1315	(AT)^8	1331	Dinucleotide	Forward
comp92035_c0_seq1	1118	(CG)^6	1130	Dinucleotide	Forward
comp209513_c0_seq1	446	(AC)^6	458	Dinucleotide	Forward
comp82470_c0_seq1	1	(CT)^11	23	Dinucleotide	Reverse: complement of AG
comp80426_c0_seq1	79	(AT)^6	91	Dinucleotide	Forward
comp81759_c0_seq1	869	(AG)^10	889	Dinucleotide	Forward
comp90753_c1_seq1	4	(AT)^9	22	Dinucleotide	Forward
comp102239_c0_seq1	298	(AT)^7	312	Dinucleotide	Forward
comp97519_c0_seq1	1	(AT)^10	21	Dinucleotide	Forward
comp59866_c0_seq1	7	(AT)^8	23	Dinucleotide	Forward
comp169517_c0_seq1	116	(AT)^7	130	Dinucleotide	Forward
comp96207_c5_seq1	815	(GT)^6	827	Dinucleotide	Reverse: complement of AC
comp81541_c0_seq1	4	(AC)^8	20	Dinucleotide	Forward
comp3347_c0_seq1	566	(GT)^9	584	Dinucleotide	Reverse: complement of AC
comp71711_c0_seq1	2	(AC)^6	14	Dinucleotide	Forward
comp96260_c0_seq1	22	(AC)^8	38	Dinucleotide	Forward
comp248714_c0_seq1	1	(AT)^9	19	Dinucleotide	Forward
comp100568_c1_seq1	42	(AG)^6	54	Dinucleotide	Forward
comp49318_c0_seq1	509	(AC)^6	521	Dinucleotide	Forward
comp102747_c0_seq1	4541	(AT)^9	4559	Dinucleotide	Forward
comp97785_c5_seq1	499	(GT)^8	515	Dinucleotide	Reverse: complement of AC
comp72318_c0_seq1	446	(AT)^9	464	Dinucleotide	Forward
comp422981_c0_seq1	104	(CT)^6	116	Dinucleotide	Reverse: complement of AG
comp99667_c1_seq1	1	(GT)^6	13	Dinucleotide	Reverse: complement of AC
comp56674_c0_seq1	738	(AC)^7	752	Dinucleotide	Forward
comp106480_c0_seq1	482	(AC)^9	500	Dinucleotide	Forward
comp110972_c0_seq1	822	(AC)^6	834	Dinucleotide	Forward
comp85168_c1_seq1	1335	(AT)^6	1347	Dinucleotide	Forward
comp98508_c0_seq1	100	(AG)^6	112	Dinucleotide	Forward
comp631534_c0_seq1	108	(GT)^6	120	Dinucleotide	Reverse: complement of AC
comp83037_c0_seq1	564	(CG)^7	578	Dinucleotide	Forward
comp89038_c0_seq1	2	(GT)^8	18	Dinucleotide	Reverse: complement of AC
comp97692_c0_seq1	714	(GT)^6	726	Dinucleotide	Reverse: complement of AC
comp365728_c0_seq1	24	(CT)^6	36	Dinucleotide	Reverse: complement of AG
comp110252_c0_seq1	1703	(GT)^7	1717	Dinucleotide	Reverse: complement of AC
comp89624_c1_seq1	2260	(AT)^7	2274	Dinucleotide	Forward
comp86046_c0_seq1	219	(GT)^6	231	Dinucleotide	Reverse: complement of AC
comp62749_c0_seq1	219	(AC)^6	231	Dinucleotide	Forward
comp98390_c1_seq1	539	(AG)^6	551	Dinucleotide	Forward
comp102117_c0_seq1	2115	(AG)^6	2127	Dinucleotide	Forward
comp79069_c1_seq1	716	(AC)^6	728	Dinucleotide	Forward
comp94399_c1_seq1	328	(GT)^7	342	Dinucleotide	Reverse: complement of AC
comp90841_c0_seq1	374	(GT)^6	386	Dinucleotide	Reverse: complement of AC
comp74948_c1_seq1	480	(GT)^6	492	Dinucleotide	Reverse: complement of AC
comp23642_c0_seq1	10	(AT)^7	24	Dinucleotide	Forward
comp96840_c1_seq1	819	(AT)^10	839	Dinucleotide	Forward
comp103273_c0_seq1	2465	(AT)^6	2477	Dinucleotide	Forward
comp323152_c0_seq1	6	(CT)^9	24	Dinucleotide	Reverse: complement of AG
comp104985_c0_seq1	432	(CT)^7	446	Dinucleotide	Reverse: complement of AG
comp98347_c3_seq1	662	(AT)^8	678	Dinucleotide	Forward
comp104379_c0_seq1	73	(CT)^6	85	Dinucleotide	Reverse: complement of AG
comp102649_c0_seq1	64	(AC)^7	78	Dinucleotide	Forward
comp577_c0_seq1	184	(AT)^6	196	Dinucleotide	Forward
comp86909_c0_seq1	1410	(GT)^6	1422	Dinucleotide	Reverse: complement of AC
comp70544_c0_seq1	840	(AG)^6	852	Dinucleotide	Forward
comp86295_c0_seq1	267	(GT)^6	279	Dinucleotide	Reverse: complement of AC
comp95680_c0_seq1	115	(AC)^6	127	Dinucleotide	Forward
comp100914_c2_seq1	1294	(AC)^10	1314	Dinucleotide	Forward
comp76625_c2_seq1	947	(AT)^8	963	Dinucleotide	Forward
comp99547_c2_seq1	1	(AT)^9	19	Dinucleotide	Forward
comp441150_c0_seq1	1324	(GT)^6	1336	Dinucleotide	Reverse: complement of AC
comp88958_c1_seq1	162	(AC)^8	178	Dinucleotide	Forward
comp82707_c0_seq1	26	(AT)^8	42	Dinucleotide	Forward
comp100995_c0_seq1	380	(GT)^7	394	Dinucleotide	Reverse: complement of AC
comp1179889_c0_seq1	173	(GT)^7	187	Dinucleotide	Reverse: complement of AC
comp102581_c0_seq1	1	(AC)^9	19	Dinucleotide	Forward
comp42920_c0_seq1	327	(AT)^7	341	Dinucleotide	Forward
comp104164_c0_seq1	128	(GT)^6	140	Dinucleotide	Reverse: complement of AC
comp91926_c0_seq1	27	(AC)^6	39	Dinucleotide	Forward
comp85471_c0_seq1	542	(AT)^6	554	Dinucleotide	Forward
comp87730_c0_seq1	868	(AC)^7	882	Dinucleotide	Forward
comp101707_c2_seq1	580	(AT)^6	592	Dinucleotide	Forward
comp95398_c0_seq1	3754	(AG)^6	3766	Dinucleotide	Forward
comp97593_c0_seq1	984	(AC)^6	996	Dinucleotide	Forward
comp97593_c0_seq1	1194	(AC)^8	1210	Dinucleotide	Forward
comp475177_c0_seq1	362	(AC)^6	374	Dinucleotide	Forward
comp74287_c1_seq1	1	(AT)^6	13	Dinucleotide	Forward
comp77422_c0_seq1	420	(AC)^6	432	Dinucleotide	Forward
comp99376_c0_seq1	2026	(AT)^9	2044	Dinucleotide	Forward
comp103060_c1_seq1	1249	(AC)^8	1265	Dinucleotide	Forward
comp71421_c0_seq1	88	(AC)^6	100	Dinucleotide	Forward
comp71421_c0_seq1	192	(AC)^6	204	Dinucleotide	Forward
comp985545_c0_seq1	116	(AC)^6	128	Dinucleotide	Forward
comp73868_c0_seq1	2	(AG)^11	24	Dinucleotide	Forward
comp424_c0_seq1	143	(AG)^9	161	Dinucleotide	Forward
comp96614_c1_seq1	738	(AT)^6	750	Dinucleotide	Forward
comp83997_c0_seq1	11	(AT)^6	23	Dinucleotide	Forward
comp83997_c0_seq1	429	(AC)^6	441	Dinucleotide	Forward
comp95837_c0_seq1	105	(AT)^6	117	Dinucleotide	Forward
comp85431_c0_seq1	103	(CT)^8	119	Dinucleotide	Reverse: complement of AG
comp441111_c0_seq1	8	(GT)^8	24	Dinucleotide	Reverse: complement of AC
comp702054_c0_seq1	445	(AC)^6	457	Dinucleotide	Forward
comp90156_c0_seq1	964	(AG)^6	976	Dinucleotide	Forward
comp73335_c1_seq1	1	(GT)^11	23	Dinucleotide	Reverse: complement of AC
comp99423_c1_seq1	541	(CT)^10	561	Dinucleotide	Reverse: complement of AG
comp104490_c0_seq1	900	(GT)^8	916	Dinucleotide	Reverse: complement of AC
comp89272_c0_seq1	762	(AC)^8	778	Dinucleotide	Forward
comp99161_c3_seq1	208	(AG)^8	224	Dinucleotide	Forward
comp66732_c0_seq1	233	(AT)^9	251	Dinucleotide	Forward
comp86462_c1_seq1	275	(AT)^6	287	Dinucleotide	Forward
comp59228_c1_seq1	1590	(AC)^7	1604	Dinucleotide	Forward
comp58611_c0_seq1	1	(AT)^6	13	Dinucleotide	Forward
comp108675_c0_seq1	1	(AT)^11	23	Dinucleotide	Forward
comp102676_c0_seq1	2506	(AT)^10	2526	Dinucleotide	Forward
comp448425_c0_seq1	2	(AT)^6	14	Dinucleotide	Forward
comp40861_c0_seq1	1	(AT)^8	17	Dinucleotide	Forward
comp74635_c0_seq1	343	(CG)^6	355	Dinucleotide	Forward
comp100636_c0_seq1	1873	(AG)^6	1885	Dinucleotide	Forward
comp95672_c0_seq1	544	(AT)^8	560	Dinucleotide	Forward
comp88591_c0_seq1	484	(AT)^11	506	Dinucleotide	Forward
comp176342_c0_seq1	64	(AC)^8	80	Dinucleotide	Forward
comp176342_c0_seq1	1058	(GT)^8	1074	Dinucleotide	Reverse: complement of AC
comp55768_c0_seq1	408	(CT)^6	420	Dinucleotide	Reverse: complement of AG
comp92360_c1_seq1	1	(AT)^11	23	Dinucleotide	Forward
comp88341_c0_seq1	1	(AC)^11	23	Dinucleotide	Forward
comp103233_c1_seq1	547	(AC)^6	559	Dinucleotide	Forward
comp66661_c1_seq1	278	(AC)^6	290	Dinucleotide	Forward
comp89852_c0_seq1	473	(AC)^9	491	Dinucleotide	Forward
comp193848_c0_seq1	3368	(AC)^9	3386	Dinucleotide	Forward
comp91130_c0_seq1	202	(AC)^7	216	Dinucleotide	Forward
comp97859_c0_seq1	444	(AG)^6	456	Dinucleotide	Forward
comp73646_c0_seq1	173	(AC)^8	189	Dinucleotide	Forward
comp29978_c0_seq1	87	(AT)^9	105	Dinucleotide	Forward
comp85403_c0_seq1	418	(GT)^7	432	Dinucleotide	Reverse: complement of AC
comp102699_c1_seq1	557	(GT)^6	569	Dinucleotide	Reverse: complement of AC
comp76562_c0_seq1	42	(AT)^7	56	Dinucleotide	Forward
comp47628_c0_seq1	1	(GT)^10	21	Dinucleotide	Reverse: complement of AC
comp48650_c0_seq1	449	(GT)^6	461	Dinucleotide	Reverse: complement of AC
comp72865_c0_seq1	1778	(AG)^6	1790	Dinucleotide	Forward
comp111383_c0_seq1	152	(AG)^6	164	Dinucleotide	Forward
comp106737_c0_seq1	126	(CT)^7	140	Dinucleotide	Reverse: complement of AG
comp19199_c0_seq1	1817	(AT)^9	1835	Dinucleotide	Forward
comp115507_c0_seq1	2374	(AT)^7	2388	Dinucleotide	Forward
comp82043_c0_seq1	558	(GT)^11	580	Dinucleotide	Reverse: complement of AC
comp78671_c0_seq1	2	(AT)^6	14	Dinucleotide	Forward
comp96875_c0_seq1	1	(GT)^8	17	Dinucleotide	Reverse: complement of AC
comp57291_c0_seq1	1043	(AT)^9	1061	Dinucleotide	Forward
comp463696_c0_seq1	516	(GT)^7	530	Dinucleotide	Reverse: complement of AC
comp280925_c0_seq1	370	(CT)^7	384	Dinucleotide	Reverse: complement of AG
comp81532_c0_seq1	2096	(GT)^6	2108	Dinucleotide	Reverse: complement of AC
comp73440_c0_seq1	1980	(AG)^11	2002	Dinucleotide	Forward
comp17442_c0_seq1	421	(AC)^6	433	Dinucleotide	Forward
comp60128_c0_seq1	706	(AT)^8	722	Dinucleotide	Forward
comp59279_c0_seq1	1073	(AC)^6	1085	Dinucleotide	Forward
comp97922_c1_seq1	1	(GT)^10	21	Dinucleotide	Reverse: complement of AC
comp95107_c0_seq1	86	(AG)^6	98	Dinucleotide	Forward
comp76244_c0_seq1	751	(GT)^6	763	Dinucleotide	Reverse: complement of AC
comp91992_c0_seq1	489	(AT)^7	503	Dinucleotide	Forward
comp331736_c0_seq1	503	(GT)^6	515	Dinucleotide	Reverse: complement of AC
comp96840_c0_seq1	549	(AT)^10	569	Dinucleotide	Forward
comp70666_c0_seq1	15	(AG)^6	27	Dinucleotide	Forward
comp92836_c0_seq1	172	(AT)^6	184	Dinucleotide	Forward
comp91307_c0_seq1	924	(AG)^9	942	Dinucleotide	Forward
comp69198_c0_seq1	739	(CT)^6	751	Dinucleotide	Reverse: complement of AG
comp69198_c0_seq1	1012	(AT)^7	1026	Dinucleotide	Forward
comp100817_c0_seq1	259	(AT)^7	273	Dinucleotide	Forward
comp98911_c0_seq1	5237	(AG)^6	5249	Dinucleotide	Forward
comp93678_c1_seq1	9	(AC)^6	21	Dinucleotide	Forward
comp89658_c0_seq1	16	(AT)^9	34	Dinucleotide	Forward
comp84322_c0_seq1	58	(AG)^8	74	Dinucleotide	Forward
comp882310_c0_seq1	1	(AG)^10	21	Dinucleotide	Forward
comp23645_c0_seq1	79	(AC)^7	93	Dinucleotide	Forward
comp121911_c0_seq1	445	(GT)^6	457	Dinucleotide	Reverse: complement of AC
comp93799_c0_seq1	1	(GT)^9	19	Dinucleotide	Reverse: complement of AC
comp54523_c0_seq1	306	(AC)^6	318	Dinucleotide	Forward
comp108128_c0_seq1	1	(AT)^10	21	Dinucleotide	Forward
comp42805_c0_seq1	154	(AG)^7	168	Dinucleotide	Forward
comp100062_c1_seq1	243	(CT)^9	261	Dinucleotide	Reverse: complement of AG
comp80554_c0_seq1	236	(GT)^7	250	Dinucleotide	Reverse: complement of AC
comp80554_c0_seq1	1351	(AT)^8	1367	Dinucleotide	Forward
comp102405_c1_seq1	1115	(AT)^6	1127	Dinucleotide	Forward
comp68499_c0_seq1	1798	(AG)^10	1818	Dinucleotide	Forward
comp93741_c0_seq1	443	(AC)^7	457	Dinucleotide	Forward
comp95834_c0_seq1	762	(AT)^7	776	Dinucleotide	Forward
comp96303_c0_seq1	1	(AT)^7	15	Dinucleotide	Forward
comp82143_c0_seq1	53	(GT)^7	67	Dinucleotide	Reverse: complement of AC
comp896_c0_seq1	758	(AC)^6	770	Dinucleotide	Forward
comp81092_c0_seq1	107	(AT)^7	121	Dinucleotide	Forward
comp81092_c0_seq1	1204	(AC)^6	1216	Dinucleotide	Forward
comp37921_c0_seq1	279	(CT)^6	291	Dinucleotide	Reverse: complement of AG
comp80282_c0_seq1	45	(CT)^6	57	Dinucleotide	Reverse: complement of AG
comp85787_c1_seq1	5	(AT)^9	23	Dinucleotide	Forward
comp90830_c0_seq1	269	(AT)^7	283	Dinucleotide	Forward
comp22053_c0_seq1	893	(AT)^6	905	Dinucleotide	Forward
comp80141_c0_seq1	26	(AT)^7	40	Dinucleotide	Forward
comp83559_c0_seq1	74	(AT)^6	86	Dinucleotide	Forward
comp101156_c0_seq1	67	(GT)^6	79	Dinucleotide	Reverse: complement of AC
comp203767_c0_seq1	720	(AT)^10	740	Dinucleotide	Forward
comp106015_c0_seq1	1108	(AT)^6	1120	Dinucleotide	Forward
comp106321_c0_seq1	437	(GT)^7	451	Dinucleotide	Reverse: complement of AC
comp73157_c0_seq1	1	(GT)^10	21	Dinucleotide	Reverse: complement of AC
comp536594_c0_seq1	669	(GT)^7	683	Dinucleotide	Reverse: complement of AC
comp69962_c0_seq1	243	(AG)^6	255	Dinucleotide	Forward
comp87593_c0_seq1	1671	(AT)^9	1689	Dinucleotide	Forward
comp92785_c0_seq1	2	(CT)^10	22	Dinucleotide	Reverse: complement of AG
comp3120_c0_seq1	565	(AT)^6	577	Dinucleotide	Forward
comp12548_c0_seq1	131	(AG)^6	143	Dinucleotide	Forward
comp99681_c0_seq1	1766	(AC)^9	1784	Dinucleotide	Forward
comp24791_c0_seq1	1651	(AT)^6	1663	Dinucleotide	Forward
comp24791_c0_seq1	1665	(AT)^9	1683	Dinucleotide	Forward
comp87847_c0_seq1	520	(GT)^6	532	Dinucleotide	Reverse: complement of AC
comp62214_c0_seq1	454	(AC)^7	468	Dinucleotide	Forward
comp38555_c0_seq1	283	(AC)^8	299	Dinucleotide	Forward
comp47513_c0_seq1	1	(AT)^10	21	Dinucleotide	Forward
comp22358_c0_seq1	755	(AC)^8	771	Dinucleotide	Forward
comp463425_c0_seq1	1199	(GT)^6	1211	Dinucleotide	Reverse: complement of AC
comp463425_c0_seq1	1182	(GT)^6	1194	Dinucleotide	Reverse: complement of AC
comp11375_c0_seq1	1	(GT)^8	17	Dinucleotide	Reverse: complement of AC
comp63833_c0_seq1	1	(GT)^7	15	Dinucleotide	Reverse: complement of AC
comp16541_c0_seq1	870	(AC)^7	884	Dinucleotide	Forward
comp79597_c0_seq1	374	(AT)^6	386	Dinucleotide	Forward
comp85324_c0_seq1	165	(AG)^7	179	Dinucleotide	Forward
comp98290_c0_seq1	1763	(GT)^10	1783	Dinucleotide	Reverse: complement of AC
comp85920_c0_seq1	292	(GT)^7	306	Dinucleotide	Reverse: complement of AC
comp800780_c0_seq1	498	(AT)^9	516	Dinucleotide	Forward
comp1822_c0_seq1	2	(AG)^10	22	Dinucleotide	Forward
comp106722_c0_seq1	1546	(CT)^7	1560	Dinucleotide	Reverse: complement of AG
comp16837_c0_seq1	232	(CT)^7	246	Dinucleotide	Reverse: complement of AG
comp97417_c0_seq1	1290	(AT)^6	1302	Dinucleotide	Forward
comp100733_c1_seq1	2	(AT)^10	22	Dinucleotide	Forward
comp88102_c0_seq1	974	(GT)^7	988	Dinucleotide	Reverse: complement of AC
comp102545_c0_seq1	576	(AT)^7	590	Dinucleotide	Forward
comp102467_c0_seq1	2	(AT)^11	24	Dinucleotide	Forward
comp95292_c1_seq1	288	(AC)^6	300	Dinucleotide	Forward
comp103938_c0_seq1	905	(CT)^7	919	Dinucleotide	Reverse: complement of AG
comp24407_c0_seq1	997	(AG)^11	1019	Dinucleotide	Forward
comp83577_c0_seq1	5955	(AT)^6	5967	Dinucleotide	Forward
comp83577_c0_seq1	5977	(AT)^6	5989	Dinucleotide	Forward
comp60059_c0_seq1	87	(AC)^7	101	Dinucleotide	Forward
comp60059_c0_seq1	821	(GT)^6	833	Dinucleotide	Reverse: complement of AC
comp101359_c0_seq1	348	(AC)^8	364	Dinucleotide	Forward
comp333621_c0_seq1	853	(AT)^8	869	Dinucleotide	Forward
comp771619_c0_seq1	104	(AT)^6	116	Dinucleotide	Forward
comp211528_c0_seq1	725	(AG)^6	737	Dinucleotide	Forward
comp76585_c0_seq1	1062	(AC)^9	1080	Dinucleotide	Forward
comp100415_c2_seq1	9	(AT)^8	25	Dinucleotide	Forward
comp67956_c0_seq1	551	(AT)^6	563	Dinucleotide	Forward
comp43457_c0_seq1	2	(AT)^10	22	Dinucleotide	Forward
comp59079_c0_seq1	3	(CT)^8	19	Dinucleotide	Reverse: complement of AG
comp92305_c1_seq1	907	(AT)^8	923	Dinucleotide	Forward
comp90753_c2_seq1	3	(AT)^9	21	Dinucleotide	Forward
comp99259_c6_seq1	10	(AT)^6	22	Dinucleotide	Forward
comp99259_c6_seq1	4536	(CT)^9	4554	Dinucleotide	Reverse: complement of AG
comp89964_c0_seq1	3	(AG)^8	19	Dinucleotide	Forward
comp60301_c0_seq1	2	(GT)^9	20	Dinucleotide	Reverse: complement of AC
comp101631_c0_seq1	1766	(AT)^9	1784	Dinucleotide	Forward
comp93543_c0_seq1	2	(AC)^8	18	Dinucleotide	Forward
comp102322_c3_seq1	1	(AT)^7	15	Dinucleotide	Forward
comp102322_c3_seq1	107	(GT)^6	119	Dinucleotide	Reverse: complement of AC
comp102870_c0_seq1	1278	(GT)^8	1294	Dinucleotide	Reverse: complement of AC
comp72605_c1_seq1	670	(AT)^7	684	Dinucleotide	Forward
comp96116_c2_seq1	60	(AC)^7	74	Dinucleotide	Forward
comp2522_c0_seq1	1244	(GT)^6	1256	Dinucleotide	Reverse: complement of AC
comp98347_c9_seq1	10	(GT)^6	22	Dinucleotide	Reverse: complement of AC
comp83347_c0_seq1	428	(AC)^6	440	Dinucleotide	Forward
comp100503_c8_seq1	9	(GT)^6	21	Dinucleotide	Reverse: complement of AC
comp52060_c0_seq1	92	(AC)^6	104	Dinucleotide	Forward
comp94121_c0_seq1	924	(GT)^7	938	Dinucleotide	Reverse: complement of AC
comp422387_c0_seq1	701	(GT)^6	713	Dinucleotide	Reverse: complement of AC
comp21357_c0_seq1	503	(GT)^6	515	Dinucleotide	Reverse: complement of AC
comp642499_c0_seq1	338	(AC)^7	352	Dinucleotide	Forward
comp58384_c0_seq1	441	(GT)^7	455	Dinucleotide	Reverse: complement of AC
comp82142_c0_seq1	31	(AT)^6	43	Dinucleotide	Forward
comp83177_c1_seq1	467	(GT)^6	479	Dinucleotide	Reverse: complement of AC
comp89932_c0_seq1	80	(GT)^9	98	Dinucleotide	Reverse: complement of AC
comp96662_c0_seq1	106	(CT)^6	118	Dinucleotide	Reverse: complement of AG
comp105368_c0_seq1	220	(AT)^7	234	Dinucleotide	Forward
comp86456_c0_seq1	1	(AT)^6	13	Dinucleotide	Forward
comp99604_c3_seq1	9	(GT)^8	25	Dinucleotide	Reverse: complement of AC
comp97663_c2_seq1	1	(AC)^6	13	Dinucleotide	Forward
comp103670_c1_seq1	2	(AC)^7	16	Dinucleotide	Forward
comp104652_c0_seq1	2	(AT)^10	22	Dinucleotide	Forward
comp81049_c0_seq1	1216	(AT)^7	1230	Dinucleotide	Forward
comp96875_c1_seq1	776	(GT)^9	794	Dinucleotide	Reverse: complement of AC
comp77448_c0_seq1	1	(GT)^7	15	Dinucleotide	Reverse: complement of AC
comp110526_c0_seq1	2	(AT)^10	22	Dinucleotide	Forward
comp102864_c0_seq1	797	(AT)^7	811	Dinucleotide	Forward
comp100523_c3_seq1	562	(GT)^6	574	Dinucleotide	Reverse: complement of AC
comp92500_c0_seq1	375	(GT)^6	387	Dinucleotide	Reverse: complement of AC
comp88427_c0_seq1	690	(AT)^9	708	Dinucleotide	Forward
comp103515_c0_seq1	1034	(AT)^8	1050	Dinucleotide	Forward
comp446860_c0_seq1	8	(GT)^8	24	Dinucleotide	Reverse: complement of AC
comp74345_c0_seq1	2124	(CT)^6	2136	Dinucleotide	Reverse: complement of AG
comp81441_c0_seq1	217	(AC)^6	229	Dinucleotide	Forward
comp94507_c2_seq1	1349	(AT)^8	1365	Dinucleotide	Forward
comp97413_c0_seq1	819	(CT)^6	831	Dinucleotide	Reverse: complement of AG
comp779646_c0_seq1	661	(GT)^8	677	Dinucleotide	Reverse: complement of AC
comp16080_c0_seq1	1709	(GT)^7	1723	Dinucleotide	Reverse: complement of AC
comp76500_c1_seq1	93	(AC)^6	105	Dinucleotide	Forward
comp133602_c0_seq1	99	(AC)^6	111	Dinucleotide	Forward
comp95148_c0_seq1	1075	(AC)^6	1087	Dinucleotide	Forward
comp96940_c0_seq1	35	(GT)^6	47	Dinucleotide	Reverse: complement of AC
comp93487_c0_seq1	1	(AT)^6	13	Dinucleotide	Forward
comp99640_c1_seq1	814	(GT)^6	826	Dinucleotide	Reverse: complement of AC
comp61205_c0_seq1	20	(AC)^10	40	Dinucleotide	Forward
comp61205_c0_seq1	57	(AC)^7	71	Dinucleotide	Forward
comp82633_c0_seq1	1152	(AG)^6	1164	Dinucleotide	Forward
comp86541_c1_seq1	92	(GT)^6	104	Dinucleotide	Reverse: complement of AC
comp57848_c0_seq1	458	(AT)^6	470	Dinucleotide	Forward
comp449284_c0_seq1	341	(GT)^6	353	Dinucleotide	Reverse: complement of AC
comp26155_c0_seq1	984	(AG)^6	996	Dinucleotide	Forward
comp90668_c0_seq1	163	(AC)^8	179	Dinucleotide	Forward
comp42443_c0_seq1	881	(AT)^9	899	Dinucleotide	Forward
comp90570_c0_seq1	2	(AT)^6	14	Dinucleotide	Forward
comp124781_c0_seq1	1	(AT)^9	19	Dinucleotide	Forward
comp95074_c1_seq1	6	(AT)^9	24	Dinucleotide	Forward
comp104820_c0_seq1	2	(AT)^11	24	Dinucleotide	Forward
comp267975_c0_seq1	87	(AG)^6	99	Dinucleotide	Forward
comp102114_c3_seq1	1	(AT)^9	19	Dinucleotide	Forward
comp94190_c0_seq1	9	(AT)^7	23	Dinucleotide	Forward
comp92513_c0_seq1	2201	(AT)^6	2213	Dinucleotide	Forward
comp101191_c6_seq1	373	(GT)^6	385	Dinucleotide	Reverse: complement of AC
comp29557_c0_seq1	1430	(AG)^6	1442	Dinucleotide	Forward
comp85895_c0_seq1	10	(AT)^7	24	Dinucleotide	Forward
comp96058_c0_seq1	304	(AC)^7	318	Dinucleotide	Forward
comp61585_c0_seq1	591	(AT)^6	603	Dinucleotide	Forward
comp72162_c0_seq1	1748	(GT)^9	1766	Dinucleotide	Reverse: complement of AC
comp82342_c0_seq1	394	(GT)^7	408	Dinucleotide	Reverse: complement of AC
comp84560_c0_seq1	658	(AC)^7	672	Dinucleotide	Forward
comp84560_c0_seq1	1199	(AT)^11	1221	Dinucleotide	Forward
comp64745_c0_seq1	1209	(GT)^7	1223	Dinucleotide	Reverse: complement of AC
comp84592_c0_seq1	607	(AC)^6	619	Dinucleotide	Forward
comp85291_c2_seq1	756	(AT)^8	772	Dinucleotide	Forward
comp92764_c1_seq1	1919	(GT)^6	1931	Dinucleotide	Reverse: complement of AC
comp84089_c0_seq1	68	(GT)^6	80	Dinucleotide	Reverse: complement of AC
comp100457_c0_seq1	1085	(GT)^6	1097	Dinucleotide	Reverse: complement of AC
comp100957_c0_seq1	803	(GT)^7	817	Dinucleotide	Reverse: complement of AC
comp100363_c0_seq1	1324	(GT)^7	1338	Dinucleotide	Reverse: complement of AC
comp70143_c0_seq1	1104	(AT)^6	1116	Dinucleotide	Forward
comp47518_c0_seq1	2	(AC)^9	20	Dinucleotide	Forward
comp114123_c0_seq1	61	(AT)^6	73	Dinucleotide	Forward
comp86151_c1_seq1	1781	(GT)^6	1793	Dinucleotide	Reverse: complement of AC
comp81267_c0_seq1	2	(AC)^6	14	Dinucleotide	Forward
comp80759_c1_seq1	1	(GT)^8	17	Dinucleotide	Reverse: complement of AC
comp58766_c1_seq1	514	(GT)^6	526	Dinucleotide	Reverse: complement of AC
comp92705_c0_seq1	2164	(AG)^8	2180	Dinucleotide	Forward
comp71714_c1_seq1	678	(AC)^6	690	Dinucleotide	Forward
comp71714_c1_seq1	25	(GT)^8	41	Dinucleotide	Reverse: complement of AC
comp97164_c0_seq1	238	(AC)^6	250	Dinucleotide	Forward
comp87230_c0_seq1	226	(CT)^7	240	Dinucleotide	Reverse: complement of AG
comp87230_c0_seq1	4	(GT)^7	18	Dinucleotide	Reverse: complement of AC
comp15287_c0_seq1	1443	(GT)^6	1455	Dinucleotide	Reverse: complement of AC
comp93783_c0_seq1	1463	(GT)^6	1475	Dinucleotide	Reverse: complement of AC
comp58158_c0_seq1	156	(AG)^8	172	Dinucleotide	Forward
comp89999_c0_seq1	12	(AC)^6	24	Dinucleotide	Forward
comp40706_c0_seq1	216	(GT)^8	232	Dinucleotide	Reverse: complement of AC
comp36571_c0_seq1	664	(GT)^6	676	Dinucleotide	Reverse: complement of AC
comp73956_c0_seq1	2962	(AG)^8	2978	Dinucleotide	Forward
comp57892_c0_seq1	2	(GT)^10	22	Dinucleotide	Reverse: complement of AC
comp68119_c0_seq1	3722	(AG)^6	3734	Dinucleotide	Forward
comp252269_c0_seq1	603	(AT)^7	617	Dinucleotide	Forward
comp71487_c0_seq1	2	(AG)^10	22	Dinucleotide	Forward
comp75224_c0_seq1	801	(GT)^6	813	Dinucleotide	Reverse: complement of AC
comp104570_c0_seq1	116	(AG)^6	128	Dinucleotide	Forward
comp99394_c0_seq1	1290	(GT)^6	1302	Dinucleotide	Reverse: complement of AC
comp103955_c0_seq1	13	(AT)^6	25	Dinucleotide	Forward
comp331336_c0_seq1	524	(AC)^6	536	Dinucleotide	Forward
comp90506_c0_seq1	904	(GT)^6	916	Dinucleotide	Reverse: complement of AC
comp94575_c0_seq1	2	(AT)^10	22	Dinucleotide	Forward
comp37141_c0_seq1	487	(AG)^7	501	Dinucleotide	Forward
comp41387_c0_seq1	2	(GT)^9	20	Dinucleotide	Reverse: complement of AC
comp49403_c0_seq1	545	(AC)^7	559	Dinucleotide	Forward
comp77249_c1_seq1	1865	(AC)^6	1877	Dinucleotide	Forward
comp69336_c0_seq1	2	(AT)^10	22	Dinucleotide	Forward
comp99167_c0_seq1	1717	(AG)^7	1731	Dinucleotide	Forward
comp103155_c0_seq1	566	(GT)^7	580	Dinucleotide	Reverse: complement of AC
comp95273_c1_seq1	2866	(AC)^8	2882	Dinucleotide	Forward
comp66912_c1_seq1	230	(AT)^6	242	Dinucleotide	Forward
comp101676_c1_seq1	2	(AG)^10	22	Dinucleotide	Forward
comp146633_c0_seq1	625	(AC)^9	643	Dinucleotide	Forward
comp103372_c0_seq1	998	(AC)^6	1010	Dinucleotide	Forward
comp163800_c0_seq1	2	(AT)^10	22	Dinucleotide	Forward
comp60518_c0_seq1	445	(AT)^7	459	Dinucleotide	Forward
comp92281_c0_seq1	1	(AT)^10	21	Dinucleotide	Forward
comp96552_c1_seq1	359	(AG)^6	371	Dinucleotide	Forward
comp68643_c1_seq1	1	(AG)^8	17	Dinucleotide	Forward
comp57991_c0_seq1	1479	(CG)^7	1493	Dinucleotide	Forward
comp89039_c2_seq1	7	(AG)^8	23	Dinucleotide	Forward
comp89565_c0_seq1	854	(AT)^10	874	Dinucleotide	Forward
comp95556_c1_seq1	2	(AC)^8	18	Dinucleotide	Forward
comp227710_c0_seq1	526	(AT)^7	540	Dinucleotide	Forward
comp77675_c0_seq1	657	(GT)^6	669	Dinucleotide	Reverse: complement of AC
comp93089_c0_seq1	926	(AC)^7	940	Dinucleotide	Forward
comp92326_c0_seq1	447	(GT)^6	459	Dinucleotide	Reverse: complement of AC
comp39452_c0_seq1	81	(AC)^7	95	Dinucleotide	Forward
comp102149_c3_seq1	801	(AG)^6	813	Dinucleotide	Forward
comp80096_c0_seq1	470	(AG)^7	484	Dinucleotide	Forward
comp96281_c0_seq1	931	(GT)^9	949	Dinucleotide	Reverse: complement of AC
comp440128_c0_seq1	9	(GT)^7	23	Dinucleotide	Reverse: complement of AC
comp73817_c0_seq1	1461	(AT)^6	1473	Dinucleotide	Forward
comp82870_c0_seq1	234	(GT)^6	246	Dinucleotide	Reverse: complement of AC
comp71419_c0_seq1	3	(GT)^10	23	Dinucleotide	Reverse: complement of AC
comp104920_c0_seq1	1282	(AG)^7	1296	Dinucleotide	Forward
comp72670_c0_seq1	40	(AC)^6	52	Dinucleotide	Forward
comp72670_c0_seq1	3122	(AC)^7	3136	Dinucleotide	Forward
comp42545_c0_seq1	623	(GT)^6	635	Dinucleotide	Reverse: complement of AC
comp91351_c0_seq1	40	(GT)^6	52	Dinucleotide	Reverse: complement of AC
comp77432_c0_seq1	27	(AT)^6	39	Dinucleotide	Forward
comp94900_c1_seq1	4424	(AG)^10	4444	Dinucleotide	Forward
comp68708_c0_seq1	665	(AC)^9	683	Dinucleotide	Forward
comp58281_c0_seq1	99	(AG)^7	113	Dinucleotide	Forward
comp46993_c0_seq1	425	(AC)^6	437	Dinucleotide	Forward
comp67054_c0_seq1	232	(GT)^6	244	Dinucleotide	Reverse: complement of AC
comp75777_c2_seq1	74	(CT)^7	88	Dinucleotide	Reverse: complement of AG
comp26309_c0_seq1	965	(CT)^6	977	Dinucleotide	Reverse: complement of AG
comp26309_c0_seq1	981	(AT)^11	1003	Dinucleotide	Forward
comp98845_c0_seq1	312	(AT)^8	328	Dinucleotide	Forward
comp557857_c0_seq1	313	(AC)^7	327	Dinucleotide	Forward
comp49180_c0_seq1	230	(GT)^8	246	Dinucleotide	Reverse: complement of AC
comp99591_c0_seq1	436	(CT)^7	450	Dinucleotide	Reverse: complement of AG
comp103746_c0_seq1	82	(AT)^6	94	Dinucleotide	Forward
comp72541_c0_seq1	646	(CT)^6	658	Dinucleotide	Reverse: complement of AG
comp97247_c1_seq1	1	(AT)^10	21	Dinucleotide	Forward
comp371023_c0_seq1	249	(AC)^7	263	Dinucleotide	Forward
comp56973_c1_seq1	158	(AC)^6	170	Dinucleotide	Forward
comp269401_c0_seq1	557	(GT)^6	569	Dinucleotide	Reverse: complement of AC
comp25883_c1_seq1	1040	(CT)^9	1058	Dinucleotide	Reverse: complement of AG
comp68990_c0_seq1	1	(GT)^9	19	Dinucleotide	Reverse: complement of AC
comp100813_c1_seq1	1	(GT)^11	23	Dinucleotide	Reverse: complement of AC
comp97499_c1_seq1	1276	(AC)^6	1288	Dinucleotide	Forward
comp97758_c2_seq1	1623	(AC)^7	1637	Dinucleotide	Forward
comp94303_c0_seq1	637	(GT)^7	651	Dinucleotide	Reverse: complement of AC
comp27229_c0_seq1	2138	(GT)^6	2150	Dinucleotide	Reverse: complement of AC
comp103410_c0_seq1	3	(AC)^8	19	Dinucleotide	Forward
comp179364_c0_seq1	566	(AG)^6	578	Dinucleotide	Forward
comp107665_c0_seq1	1979	(GT)^6	1991	Dinucleotide	Reverse: complement of AC
comp12031_c0_seq1	471	(AC)^7	485	Dinucleotide	Forward
comp63670_c0_seq1	264	(GT)^6	276	Dinucleotide	Reverse: complement of AC
comp91255_c0_seq1	196	(AC)^6	208	Dinucleotide	Forward
comp99550_c1_seq1	23	(AT)^6	35	Dinucleotide	Forward
comp101306_c0_seq1	25	(AT)^6	37	Dinucleotide	Forward
comp22316_c0_seq1	518	(AC)^7	532	Dinucleotide	Forward
comp100351_c0_seq1	2	(AT)^10	22	Dinucleotide	Forward
comp99279_c0_seq1	308	(CT)^6	320	Dinucleotide	Reverse: complement of AG
comp103920_c0_seq1	132	(AG)^6	144	Dinucleotide	Forward
comp101240_c4_seq1	2	(AC)^6	14	Dinucleotide	Forward
comp103915_c0_seq1	305	(AC)^6	317	Dinucleotide	Forward
comp57968_c0_seq1	420	(GT)^8	436	Dinucleotide	Reverse: complement of AC
comp100363_c1_seq1	755	(CT)^9	773	Dinucleotide	Reverse: complement of AG
comp70337_c0_seq1	3025	(AG)^6	3037	Dinucleotide	Forward
comp78602_c0_seq1	16	(AT)^7	30	Dinucleotide	Forward
comp26480_c0_seq1	1861	(AG)^7	1875	Dinucleotide	Forward
comp100765_c2_seq1	28	(AT)^9	46	Dinucleotide	Forward
comp100335_c6_seq1	1	(AT)^11	23	Dinucleotide	Forward
comp104352_c0_seq1	505	(AT)^9	523	Dinucleotide	Forward
comp55263_c0_seq1	1	(AT)^10	21	Dinucleotide	Forward
comp73281_c0_seq1	2823	(GT)^11	2845	Dinucleotide	Reverse: complement of AC
comp59353_c0_seq1	1	(GT)^10	21	Dinucleotide	Reverse: complement of AC
comp488845_c0_seq1	290	(GT)^6	302	Dinucleotide	Reverse: complement of AC
comp124310_c0_seq1	24	(AT)^7	38	Dinucleotide	Forward
comp124310_c0_seq1	1163	(AT)^9	1181	Dinucleotide	Forward
comp81821_c0_seq1	577	(GT)^8	593	Dinucleotide	Reverse: complement of AC
comp72744_c0_seq1	229	(AT)^9	247	Dinucleotide	Forward
comp62768_c0_seq1	114	(AG)^11	136	Dinucleotide	Forward
comp97986_c0_seq1	1339	(AT)^6	1351	Dinucleotide	Forward
comp44593_c0_seq1	1207	(GT)^7	1221	Dinucleotide	Reverse: complement of AC
comp44593_c0_seq1	1181	(GT)^6	1193	Dinucleotide	Reverse: complement of AC
comp103455_c0_seq1	800	(AC)^6	812	Dinucleotide	Forward
comp98736_c2_seq1	180	(GT)^6	192	Dinucleotide	Reverse: complement of AC
comp67611_c0_seq1	447	(AG)^8	463	Dinucleotide	Forward
comp289_c0_seq1	585	(GT)^6	597	Dinucleotide	Reverse: complement of AC
comp289_c0_seq1	6	(GT)^8	22	Dinucleotide	Reverse: complement of AC
comp102304_c0_seq1	1240	(AC)^10	1260	Dinucleotide	Forward
comp467500_c0_seq1	580	(GT)^7	594	Dinucleotide	Reverse: complement of AC
comp103101_c0_seq1	375	(AT)^6	387	Dinucleotide	Forward
comp95697_c1_seq1	916	(AC)^8	932	Dinucleotide	Forward
comp1145499_c0_seq1	23	(AC)^8	39	Dinucleotide	Forward
comp20486_c0_seq1	1023	(GT)^6	1035	Dinucleotide	Reverse: complement of AC
comp102516_c7_seq1	274	(AT)^10	294	Dinucleotide	Forward
comp2569_c0_seq1	973	(AC)^6	985	Dinucleotide	Forward
comp101338_c0_seq1	354	(AC)^8	370	Dinucleotide	Forward
comp81842_c0_seq1	1709	(AT)^6	1721	Dinucleotide	Forward
comp59449_c0_seq1	131	(AC)^6	143	Dinucleotide	Forward
comp88199_c1_seq1	251	(AC)^6	263	Dinucleotide	Forward
comp493044_c0_seq1	584	(GT)^8	600	Dinucleotide	Reverse: complement of AC
comp38837_c0_seq1	1013	(AT)^7	1027	Dinucleotide	Forward
comp91763_c0_seq1	87	(AC)^8	103	Dinucleotide	Forward
comp59813_c0_seq1	31	(GT)^6	43	Dinucleotide	Reverse: complement of AC
comp251405_c0_seq1	464	(AC)^6	476	Dinucleotide	Forward
comp98625_c1_seq1	1543	(AT)^11	1565	Dinucleotide	Forward
comp457225_c0_seq1	401	(GT)^6	413	Dinucleotide	Reverse: complement of AC
comp103159_c1_seq1	1496	(GT)^6	1508	Dinucleotide	Reverse: complement of AC
comp103457_c0_seq1	166	(AG)^8	182	Dinucleotide	Forward
comp102151_c3_seq1	311	(AG)^10	331	Dinucleotide	Forward
comp71840_c1_seq1	1	(GT)^10	21	Dinucleotide	Reverse: complement of AC
comp80283_c0_seq1	669	(AG)^6	681	Dinucleotide	Forward
comp24833_c0_seq1	429	(CT)^6	441	Dinucleotide	Reverse: complement of AG
comp281591_c0_seq1	359	(AT)^9	377	Dinucleotide	Forward
comp102756_c0_seq1	2382	(GT)^6	2394	Dinucleotide	Reverse: complement of AC
comp100322_c2_seq1	155	(GT)^8	171	Dinucleotide	Reverse: complement of AC
comp94301_c0_seq1	85	(AC)^8	101	Dinucleotide	Forward
comp97327_c0_seq1	93	(GT)^6	105	Dinucleotide	Reverse: complement of AC
comp83825_c0_seq1	576	(CT)^7	590	Dinucleotide	Reverse: complement of AG
comp57273_c0_seq1	60	(GT)^9	78	Dinucleotide	Reverse: complement of AC
comp51398_c1_seq1	456	(GT)^6	468	Dinucleotide	Reverse: complement of AC
comp74805_c0_seq1	100	(GT)^7	114	Dinucleotide	Reverse: complement of AC
comp470589_c0_seq1	739	(GT)^6	751	Dinucleotide	Reverse: complement of AC
comp288678_c0_seq1	1	(AT)^9	19	Dinucleotide	Forward
comp96711_c5_seq1	752	(AC)^6	764	Dinucleotide	Forward
comp25511_c0_seq1	1	(AT)^11	23	Dinucleotide	Forward
comp89550_c5_seq1	552	(AC)^7	566	Dinucleotide	Forward
comp105779_c0_seq1	619	(AT)^8	635	Dinucleotide	Forward
comp98256_c0_seq1	211	(CT)^7	225	Dinucleotide	Reverse: complement of AG
comp88974_c0_seq1	207	(CT)^6	219	Dinucleotide	Reverse: complement of AG
comp80184_c0_seq1	511	(GT)^8	527	Dinucleotide	Reverse: complement of AC
comp80184_c0_seq1	10	(GT)^6	22	Dinucleotide	Reverse: complement of AC
comp95117_c0_seq1	1576	(AT)^9	1594	Dinucleotide	Forward
comp66665_c1_seq1	433	(AC)^6	445	Dinucleotide	Forward
comp102296_c1_seq1	471	(GT)^8	487	Dinucleotide	Reverse: complement of AC
comp696513_c0_seq1	556	(GT)^7	570	Dinucleotide	Reverse: complement of AC
comp89001_c0_seq1	203	(CT)^7	217	Dinucleotide	Reverse: complement of AG
comp86890_c0_seq1	487	(GT)^6	499	Dinucleotide	Reverse: complement of AC
comp280197_c0_seq1	248	(CT)^7	262	Dinucleotide	Reverse: complement of AG
comp96416_c0_seq1	1767	(AT)^7	1781	Dinucleotide	Forward
comp84965_c0_seq1	2	(AT)^8	18	Dinucleotide	Forward
comp84965_c0_seq1	789	(AC)^7	803	Dinucleotide	Forward
comp86756_c0_seq1	167	(AC)^6	179	Dinucleotide	Forward
comp97382_c1_seq1	13	(AT)^6	25	Dinucleotide	Forward
comp97382_c1_seq1	1	(GT)^6	13	Dinucleotide	Reverse: complement of AC
comp97265_c4_seq1	1	(AT)^10	21	Dinucleotide	Forward
comp102709_c0_seq1	399	(GT)^6	411	Dinucleotide	Reverse: complement of AC
comp592880_c0_seq1	317	(AC)^8	333	Dinucleotide	Forward
comp93134_c0_seq1	104	(GT)^7	118	Dinucleotide	Reverse: complement of AC
comp95221_c0_seq1	88	(AG)^6	100	Dinucleotide	Forward
comp69382_c1_seq1	327	(AC)^8	343	Dinucleotide	Forward
comp99547_c1_seq1	621	(AT)^9	639	Dinucleotide	Forward
comp73311_c0_seq1	1351	(GT)^6	1363	Dinucleotide	Reverse: complement of AC
comp899958_c0_seq1	403	(AC)^6	415	Dinucleotide	Forward
comp59082_c2_seq1	508	(GT)^9	526	Dinucleotide	Reverse: complement of AC
comp99017_c1_seq1	27	(AT)^7	41	Dinucleotide	Forward
comp99017_c1_seq1	540	(AT)^8	556	Dinucleotide	Forward
comp99017_c1_seq1	1055	(AT)^7	1069	Dinucleotide	Forward
comp299837_c0_seq1	290	(AT)^6	302	Dinucleotide	Forward
comp33491_c0_seq1	147	(AT)^7	161	Dinucleotide	Forward
comp73482_c0_seq1	63	(AG)^7	77	Dinucleotide	Forward
comp73482_c0_seq1	78	(AG)^10	98	Dinucleotide	Forward
comp384027_c0_seq1	264	(CG)^6	276	Dinucleotide	Forward
comp85804_c0_seq1	205	(AC)^7	219	Dinucleotide	Forward
comp102207_c1_seq1	2	(AC)^10	22	Dinucleotide	Forward
comp94754_c0_seq1	639	(AT)^10	659	Dinucleotide	Forward
comp511884_c0_seq1	267	(AC)^6	279	Dinucleotide	Forward
comp86923_c1_seq1	7	(AC)^9	25	Dinucleotide	Forward
comp89253_c0_seq1	1014	(AC)^6	1026	Dinucleotide	Forward
comp89895_c0_seq1	514	(AC)^7	528	Dinucleotide	Forward
comp89442_c0_seq1	436	(AT)^6	448	Dinucleotide	Forward
comp81476_c0_seq1	2	(AT)^7	16	Dinucleotide	Forward
comp84876_c0_seq1	1	(AT)^10	21	Dinucleotide	Forward
comp96173_c1_seq1	358	(AC)^8	374	Dinucleotide	Forward
comp96173_c1_seq1	428	(GT)^8	444	Dinucleotide	Reverse: complement of AC
comp644434_c0_seq1	3	(GT)^9	21	Dinucleotide	Reverse: complement of AC
comp88361_c0_seq1	1548	(AG)^8	1564	Dinucleotide	Forward
comp54795_c0_seq1	660	(AT)^8	676	Dinucleotide	Forward
comp93534_c0_seq1	51	(AC)^8	67	Dinucleotide	Forward
comp93325_c0_seq1	1312	(AT)^9	1330	Dinucleotide	Forward
comp75914_c1_seq1	1005	(AT)^7	1019	Dinucleotide	Forward
comp101518_c0_seq1	6436	(AT)^6	6448	Dinucleotide	Forward
comp79845_c0_seq1	31	(AC)^8	47	Dinucleotide	Forward
comp76905_c0_seq1	810	(GT)^6	822	Dinucleotide	Reverse: complement of AC
comp95935_c0_seq1	577	(AT)^8	593	Dinucleotide	Forward
comp520644_c0_seq1	5	(AT)^6	17	Dinucleotide	Forward
comp80532_c1_seq1	1	(AT)^9	19	Dinucleotide	Forward
comp97695_c0_seq1	2	(AT)^10	22	Dinucleotide	Forward
comp96071_c0_seq1	1667	(AT)^7	1681	Dinucleotide	Forward
comp103634_c0_seq1	3436	(GT)^7	3450	Dinucleotide	Reverse: complement of AC
comp69356_c0_seq1	10	(AC)^7	24	Dinucleotide	Forward
comp95664_c0_seq1	753	(AT)^6	765	Dinucleotide	Forward
comp91589_c0_seq1	644	(GT)^6	656	Dinucleotide	Reverse: complement of AC
comp99672_c1_seq1	88	(CT)^10	108	Dinucleotide	Reverse: complement of AG
comp81030_c2_seq1	600	(AC)^6	612	Dinucleotide	Forward
comp81030_c2_seq1	1469	(AC)^6	1481	Dinucleotide	Forward
comp236562_c0_seq1	362	(CT)^8	378	Dinucleotide	Reverse: complement of AG
comp93158_c0_seq1	733	(AC)^8	749	Dinucleotide	Forward
comp91026_c0_seq1	1	(AT)^8	17	Dinucleotide	Forward
comp255141_c0_seq1	2	(AT)^6	14	Dinucleotide	Forward
comp105617_c0_seq1	1247	(CT)^6	1259	Dinucleotide	Reverse: complement of AG
comp93366_c0_seq1	582	(AC)^7	596	Dinucleotide	Forward
comp92579_c1_seq1	2	(GT)^8	18	Dinucleotide	Reverse: complement of AC
comp61125_c0_seq1	428	(AT)^6	440	Dinucleotide	Forward
comp85596_c0_seq1	1319	(AT)^9	1337	Dinucleotide	Forward
comp40196_c0_seq1	188	(AC)^6	200	Dinucleotide	Forward
comp83742_c1_seq1	2	(AT)^11	24	Dinucleotide	Forward
comp2140_c0_seq1	363	(AC)^6	375	Dinucleotide	Forward
comp102711_c3_seq1	51	(AC)^6	63	Dinucleotide	Forward
comp97891_c0_seq1	1292	(AC)^6	1304	Dinucleotide	Forward
comp97891_c0_seq1	3011	(AC)^7	3025	Dinucleotide	Forward
comp93936_c0_seq1	604	(AC)^8	620	Dinucleotide	Forward
comp518313_c0_seq1	573	(GT)^6	585	Dinucleotide	Reverse: complement of AC
comp92687_c1_seq1	10	(GT)^7	24	Dinucleotide	Reverse: complement of AC
comp643400_c0_seq1	407	(GT)^7	421	Dinucleotide	Reverse: complement of AC
comp86066_c0_seq1	628	(GT)^6	640	Dinucleotide	Reverse: complement of AC
comp60367_c0_seq1	672	(AT)^10	692	Dinucleotide	Forward
comp73500_c0_seq1	720	(AT)^6	732	Dinucleotide	Forward
comp92352_c0_seq1	72	(AT)^6	84	Dinucleotide	Forward
comp72194_c1_seq1	538	(AG)^8	554	Dinucleotide	Forward
comp1460_c0_seq1	567	(GT)^6	579	Dinucleotide	Reverse: complement of AC
comp9263_c0_seq1	1393	(GT)^8	1409	Dinucleotide	Reverse: complement of AC
comp97774_c0_seq1	3294	(AT)^11	3316	Dinucleotide	Forward
comp94484_c0_seq1	930	(CT)^6	942	Dinucleotide	Reverse: complement of AG
comp30505_c0_seq1	2472	(GT)^8	2488	Dinucleotide	Reverse: complement of AC
comp80299_c0_seq1	290	(GT)^7	304	Dinucleotide	Reverse: complement of AC
comp101999_c0_seq1	2	(GT)^10	22	Dinucleotide	Reverse: complement of AC
comp103484_c1_seq1	2	(AG)^6	14	Dinucleotide	Forward
comp66155_c0_seq1	305	(AT)^7	319	Dinucleotide	Forward
comp76079_c0_seq1	425	(AC)^7	439	Dinucleotide	Forward
comp81022_c0_seq1	2571	(CT)^7	2585	Dinucleotide	Reverse: complement of AG
comp101634_c1_seq1	942	(AC)^6	954	Dinucleotide	Forward
comp101634_c1_seq1	2602	(AT)^9	2620	Dinucleotide	Forward
comp74318_c0_seq1	92	(AG)^6	104	Dinucleotide	Forward
comp91689_c0_seq1	59	(AT)^6	71	Dinucleotide	Forward
comp103492_c0_seq1	245	(AT)^9	263	Dinucleotide	Forward
comp98486_c2_seq1	163	(AG)^7	177	Dinucleotide	Forward
comp101708_c0_seq1	3989	(AG)^7	4003	Dinucleotide	Forward
comp73869_c0_seq1	64	(AT)^6	76	Dinucleotide	Forward
comp102290_c0_seq1	1045	(CT)^6	1057	Dinucleotide	Reverse: complement of AG
comp1166_c0_seq1	882	(AG)^7	896	Dinucleotide	Forward
comp72299_c0_seq1	2	(AT)^8	18	Dinucleotide	Forward
comp79152_c0_seq1	1479	(AT)^6	1491	Dinucleotide	Forward
comp99707_c0_seq1	344	(GT)^7	358	Dinucleotide	Reverse: complement of AC
comp101139_c0_seq1	2799	(GT)^6	2811	Dinucleotide	Reverse: complement of AC
comp101139_c0_seq1	2769	(AC)^6	2781	Dinucleotide	Forward
comp13662_c0_seq1	669	(CG)^7	683	Dinucleotide	Forward
comp20578_c0_seq1	455	(AT)^6	467	Dinucleotide	Forward
comp106646_c0_seq1	193	(AG)^6	205	Dinucleotide	Forward
comp60547_c0_seq1	358	(AT)^6	370	Dinucleotide	Forward
comp97750_c0_seq1	2	(CT)^11	24	Dinucleotide	Reverse: complement of AG
comp71939_c0_seq1	44	(AT)^6	56	Dinucleotide	Forward
comp40716_c0_seq1	566	(CT)^6	578	Dinucleotide	Reverse: complement of AG
comp60370_c0_seq1	797	(AC)^7	811	Dinucleotide	Forward
comp102835_c0_seq1	1356	(AT)^6	1368	Dinucleotide	Forward
comp135470_c0_seq1	730	(AG)^6	742	Dinucleotide	Forward
comp92656_c0_seq1	1872	(AG)^7	1886	Dinucleotide	Forward
comp908016_c0_seq1	318	(AC)^6	330	Dinucleotide	Forward
comp88826_c0_seq1	167	(AC)^6	179	Dinucleotide	Forward
comp103652_c1_seq1	1	(AT)^10	21	Dinucleotide	Forward
comp102089_c2_seq1	1507	(AC)^6	1519	Dinucleotide	Forward
comp101799_c0_seq1	1	(GT)^11	23	Dinucleotide	Reverse: complement of AC
comp66568_c0_seq1	19	(AT)^7	33	Dinucleotide	Forward
comp90240_c0_seq1	430	(AC)^6	442	Dinucleotide	Forward
comp86185_c0_seq1	83	(AT)^6	95	Dinucleotide	Forward
comp84607_c0_seq1	415	(AT)^6	427	Dinucleotide	Forward
comp331006_c0_seq1	649	(AT)^8	665	Dinucleotide	Forward
comp97782_c2_seq1	1638	(AC)^6	1650	Dinucleotide	Forward
comp39097_c0_seq1	1	(AT)^10	21	Dinucleotide	Forward
comp88287_c0_seq1	469	(AG)^6	481	Dinucleotide	Forward
comp81893_c0_seq1	1	(AT)^10	21	Dinucleotide	Forward
comp80792_c0_seq1	133	(AC)^6	145	Dinucleotide	Forward
comp80792_c0_seq1	198	(GT)^6	210	Dinucleotide	Reverse: complement of AC
comp103219_c1_seq1	993	(AT)^9	1011	Dinucleotide	Forward
comp81835_c0_seq1	2	(GT)^7	16	Dinucleotide	Reverse: complement of AC
comp80690_c0_seq1	1216	(AC)^8	1232	Dinucleotide	Forward
comp25077_c0_seq1	822	(AT)^7	836	Dinucleotide	Forward
comp57014_c0_seq1	27	(AT)^6	39	Dinucleotide	Forward
comp93652_c0_seq1	746	(AC)^6	758	Dinucleotide	Forward
comp70066_c0_seq1	160	(AC)^7	174	Dinucleotide	Forward
comp91454_c0_seq1	1125	(GT)^8	1141	Dinucleotide	Reverse: complement of AC
comp78667_c0_seq1	195	(GT)^7	209	Dinucleotide	Reverse: complement of AC
comp41843_c0_seq1	2	(AT)^8	18	Dinucleotide	Forward
comp46403_c0_seq1	1	(AT)^10	21	Dinucleotide	Forward
comp86141_c0_seq1	8	(AT)^8	24	Dinucleotide	Forward
comp79368_c2_seq1	330	(AT)^7	344	Dinucleotide	Forward
comp101004_c0_seq1	77	(AC)^7	91	Dinucleotide	Forward
comp87941_c0_seq1	502	(AC)^6	514	Dinucleotide	Forward
comp38300_c1_seq1	459	(AC)^7	473	Dinucleotide	Forward
comp91262_c0_seq1	960	(AC)^8	976	Dinucleotide	Forward
comp57815_c0_seq1	2	(GT)^10	22	Dinucleotide	Reverse: complement of AC
comp100815_c2_seq1	747	(AT)^7	761	Dinucleotide	Forward
comp81082_c1_seq1	383	(AC)^6	395	Dinucleotide	Forward
comp81082_c1_seq1	401	(AC)^6	413	Dinucleotide	Forward
comp96078_c0_seq1	388	(AG)^7	402	Dinucleotide	Forward
comp54932_c0_seq1	763	(CT)^7	777	Dinucleotide	Reverse: complement of AG
comp366133_c0_seq1	7	(AT)^9	25	Dinucleotide	Forward
comp102721_c0_seq1	2245	(GT)^8	2261	Dinucleotide	Reverse: complement of AC
comp72194_c0_seq1	2187	(CT)^12	2211	Dinucleotide	Reverse: complement of AG
comp75713_c0_seq1	984	(GT)^9	1002	Dinucleotide	Reverse: complement of AC
comp69247_c0_seq1	610	(AC)^6	622	Dinucleotide	Forward
comp69247_c0_seq1	630	(AT)^8	646	Dinucleotide	Forward
comp62362_c0_seq1	134	(AG)^8	150	Dinucleotide	Forward
comp62362_c0_seq1	183	(GT)^7	197	Dinucleotide	Reverse: complement of AC
comp92664_c0_seq1	64	(AC)^8	80	Dinucleotide	Forward
comp81457_c0_seq1	614	(AC)^7	628	Dinucleotide	Forward
comp89737_c0_seq1	1022	(AC)^10	1042	Dinucleotide	Forward
comp84203_c0_seq1	109	(AG)^9	127	Dinucleotide	Forward
comp85787_c3_seq1	3	(AT)^9	21	Dinucleotide	Forward
comp62909_c0_seq1	515	(AT)^9	533	Dinucleotide	Forward
comp95209_c0_seq1	534	(AT)^9	552	Dinucleotide	Forward
comp58933_c0_seq1	194	(CT)^6	206	Dinucleotide	Reverse: complement of AG
comp78763_c0_seq1	285	(GT)^6	297	Dinucleotide	Reverse: complement of AC
comp28007_c0_seq1	63	(CT)^6	75	Dinucleotide	Reverse: complement of AG
comp104481_c0_seq1	1007	(AT)^6	1019	Dinucleotide	Forward
comp94872_c1_seq1	969	(AC)^6	981	Dinucleotide	Forward
comp94872_c1_seq1	991	(AC)^7	1005	Dinucleotide	Forward
comp110388_c0_seq1	74	(AC)^6	86	Dinucleotide	Forward
comp100195_c1_seq1	222	(AC)^6	234	Dinucleotide	Forward
comp86578_c1_seq1	2	(CT)^10	22	Dinucleotide	Reverse: complement of AG
comp79628_c0_seq1	1208	(AC)^8	1224	Dinucleotide	Forward
comp26781_c0_seq1	4	(AC)^10	24	Dinucleotide	Forward
comp26781_c0_seq1	27	(AT)^6	39	Dinucleotide	Forward
comp105972_c0_seq1	1	(AT)^10	21	Dinucleotide	Forward
comp59082_c0_seq1	1603	(AC)^11	1625	Dinucleotide	Forward
comp100594_c6_seq1	638	(AT)^9	656	Dinucleotide	Forward
comp82820_c0_seq1	378	(CCTCGT)^4	402	Hexanucleotide	Reverse: complement of ACGAGG
comp103037_c0_seq1	2	(AAAATG)^4	26	Hexanucleotide	Forward
comp97913_c0_seq1	1523	(AAAAAG)^4	1547	Hexanucleotide	Forward
comp95384_c0_seq1	1518	(CGGAGT)^4	1542	Hexanucleotide	Reverse: complement of ACTCCG
comp94466_c0_seq1	227	(AATGAT)^4	251	Hexanucleotide	Forward
comp60548_c1_seq1	2	(AACCCG)^4	26	Hexanucleotide	Forward
comp74240_c0_seq1	230	(ACCAGC)^4	254	Hexanucleotide	Forward
comp39600_c0_seq1	179	(AGTATT)^4	203	Hexanucleotide	Reverse: complement of AATACT
comp97255_c0_seq1	1	(AACCTC)^4	25	Hexanucleotide	Forward
comp93578_c0_seq1	250	(ACACGC)^4	274	Hexanucleotide	Forward
comp96873_c0_seq1	181	(AAACCC)^4	205	Hexanucleotide	Forward
comp590889_c0_seq1	250	(AACATG)^4	274	Hexanucleotide	Forward
comp26078_c0_seq1	167	(AACAAG)^4	191	Hexanucleotide	Forward
comp103022_c0_seq1	770	(GGAGGT)^4	794	Hexanucleotide	Reverse: complement of ACCTCC
comp83402_c0_seq1	6	(ACCATG)^4	30	Hexanucleotide	Forward
comp93088_c0_seq1	657	(AACCTC)^4	681	Hexanucleotide	Forward
comp89584_c0_seq1	1	(GGATTT)^4	25	Hexanucleotide	Reverse: complement of AAATCC
comp97810_c1_seq1	2306	(AAAAAG)^4	2330	Hexanucleotide	Forward
comp58004_c0_seq1	390	(GATATT)^4	414	Hexanucleotide	Reverse: complement of AATATC
comp320254_c0_seq1	397	(AAGGCC)^4	421	Hexanucleotide	Forward
comp105360_c0_seq1	1915	(GGAATT)^4	1939	Hexanucleotide	Reverse: complement of AATTCC
comp26146_c0_seq1	143	(AAAACC)^4	167	Hexanucleotide	Forward
comp100573_c1_seq1	157	(AATGCC)^4	181	Hexanucleotide	Forward
comp104652_c0_seq1	1001	(AGAGGG)^4	1025	Hexanucleotide	Forward
comp60520_c0_seq1	1509	(AAACAC)^4	1533	Hexanucleotide	Forward
comp60617_c0_seq1	13	(AAGAGG)^4	37	Hexanucleotide	Forward
comp105400_c0_seq1	340	(AAACCG)^4	364	Hexanucleotide	Forward
comp59504_c0_seq1	294	(AAAATT)^4	318	Hexanucleotide	Forward
comp85557_c0_seq1	1426	(ACATGT)^4	1450	Hexanucleotide	Forward
comp100283_c0_seq1	2283	(CCTTTT)^4	2307	Hexanucleotide	Reverse: complement of AAAAGG
comp96329_c1_seq1	3320	(GCGTTT)^4	3344	Hexanucleotide	Reverse: complement of AAACGC
comp99856_c0_seq1	1235	(GGCGAT)^4	1259	Hexanucleotide	Reverse: complement of ATCGCC
comp98769_c0_seq1	1855	(GGTGTT)^4	1879	Hexanucleotide	Reverse: complement of AACACC
comp104838_c0_seq1	1	(A)^12	13	Mononucleotide	Forward
comp102192_c3_seq1	26	(A)^12	38	Mononucleotide	Forward
comp80288_c0_seq1	10	(A)^11	21	Mononucleotide	Forward
comp79394_c0_seq1	1	(T)^19	20	Mononucleotide	Reverse: complement of A
comp39522_c0_seq1	1081	(A)^13	1094	Mononucleotide	Forward
comp546680_c0_seq1	491	(A)^10	501	Mononucleotide	Forward
comp68123_c0_seq1	169	(T)^12	181	Mononucleotide	Reverse: complement of A
comp13206_c0_seq1	70	(A)^10	80	Mononucleotide	Forward
comp83360_c0_seq1	973	(T)^12	985	Mononucleotide	Reverse: complement of A
comp97014_c0_seq1	332	(T)^10	342	Mononucleotide	Reverse: complement of A
comp94895_c0_seq1	440	(A)^11	451	Mononucleotide	Forward
comp69490_c0_seq1	623	(A)^11	634	Mononucleotide	Forward
comp95641_c0_seq1	476	(A)^10	486	Mononucleotide	Forward
comp91296_c0_seq1	1124	(T)^14	1138	Mononucleotide	Reverse: complement of A
comp91296_c0_seq1	94	(T)^14	108	Mononucleotide	Reverse: complement of A
comp80072_c0_seq1	162	(T)^12	174	Mononucleotide	Reverse: complement of A
comp84767_c0_seq1	732	(A)^13	745	Mononucleotide	Forward
comp74979_c0_seq1	14	(A)^11	25	Mononucleotide	Forward
comp92208_c0_seq1	42	(A)^12	54	Mononucleotide	Forward
comp74266_c0_seq1	785	(A)^15	800	Mononucleotide	Forward
comp102818_c1_seq1	1002	(T)^16	1018	Mononucleotide	Reverse: complement of A
comp102213_c2_seq1	758	(A)^10	768	Mononucleotide	Forward
comp88243_c0_seq1	2298	(T)^16	2314	Mononucleotide	Reverse: complement of A
comp95401_c0_seq1	2361	(T)^10	2371	Mononucleotide	Reverse: complement of A
comp72521_c0_seq1	4	(A)^16	20	Mononucleotide	Forward
comp69836_c1_seq1	2608	(A)^17	2625	Mononucleotide	Forward
comp98223_c0_seq1	1498	(A)^10	1508	Mononucleotide	Forward
comp89210_c4_seq1	305	(A)^10	315	Mononucleotide	Forward
comp74352_c1_seq1	401	(T)^10	411	Mononucleotide	Reverse: complement of A
comp104349_c0_seq1	1621	(A)^10	1631	Mononucleotide	Forward
comp94363_c1_seq1	8	(A)^15	23	Mononucleotide	Forward
comp77215_c0_seq1	13	(A)^10	23	Mononucleotide	Forward
comp101930_c2_seq1	708	(T)^10	718	Mononucleotide	Reverse: complement of A
comp87024_c0_seq1	1110	(T)^19	1129	Mononucleotide	Reverse: complement of A
comp87024_c0_seq1	40	(A)^12	52	Mononucleotide	Forward
comp94420_c0_seq1	247	(A)^10	257	Mononucleotide	Forward
comp94420_c0_seq1	1366	(T)^10	1376	Mononucleotide	Reverse: complement of A
comp57203_c0_seq1	735	(A)^10	745	Mononucleotide	Forward
comp90574_c0_seq1	433	(A)^15	448	Mononucleotide	Forward
comp60904_c0_seq1	68	(T)^10	78	Mononucleotide	Reverse: complement of A
comp93923_c0_seq1	568	(A)^10	578	Mononucleotide	Forward
comp100312_c1_seq1	97	(T)^11	108	Mononucleotide	Reverse: complement of A
comp72858_c0_seq1	861	(T)^10	871	Mononucleotide	Reverse: complement of A
comp95918_c0_seq1	2189	(T)^13	2202	Mononucleotide	Reverse: complement of A
comp95918_c0_seq1	2529	(A)^11	2540	Mononucleotide	Forward
comp62601_c0_seq1	577	(A)^14	591	Mononucleotide	Forward
comp88281_c0_seq1	2749	(T)^10	2759	Mononucleotide	Reverse: complement of A
comp84518_c0_seq1	1	(T)^12	13	Mononucleotide	Reverse: complement of A
comp73223_c0_seq1	1050	(T)^10	1060	Mononucleotide	Reverse: complement of A
comp73223_c0_seq1	391	(A)^10	401	Mononucleotide	Forward
comp26944_c0_seq1	7	(A)^12	19	Mononucleotide	Forward
comp84832_c0_seq1	1012	(A)^10	1022	Mononucleotide	Forward
comp72181_c0_seq1	727	(T)^10	737	Mononucleotide	Reverse: complement of A
comp81755_c0_seq1	633	(A)^11	644	Mononucleotide	Forward
comp103442_c1_seq1	880	(A)^10	890	Mononucleotide	Forward
comp643788_c0_seq1	1026	(T)^12	1038	Mononucleotide	Reverse: complement of A
comp54509_c0_seq1	1333	(A)^10	1343	Mononucleotide	Forward
comp99326_c3_seq1	1160	(T)^11	1171	Mononucleotide	Reverse: complement of A
comp63851_c0_seq1	1	(A)^10	11	Mononucleotide	Forward
comp104906_c0_seq1	11	(A)^10	21	Mononucleotide	Forward
comp83625_c0_seq1	540	(A)^10	550	Mononucleotide	Forward
comp88371_c0_seq1	722	(T)^10	732	Mononucleotide	Reverse: complement of A
comp442587_c0_seq1	182	(T)^10	192	Mononucleotide	Reverse: complement of A
comp29389_c0_seq1	660	(T)^18	678	Mononucleotide	Reverse: complement of A
comp599375_c0_seq1	507	(T)^10	517	Mononucleotide	Reverse: complement of A
comp17960_c0_seq1	1	(A)^21	22	Mononucleotide	Forward
comp73139_c0_seq1	383	(A)^10	393	Mononucleotide	Forward
comp84312_c0_seq1	551	(A)^10	561	Mononucleotide	Forward
comp94535_c0_seq1	2705	(T)^13	2718	Mononucleotide	Reverse: complement of A
comp66162_c0_seq1	49	(A)^10	59	Mononucleotide	Forward
comp104751_c0_seq1	1	(T)^14	15	Mononucleotide	Reverse: complement of A
comp101948_c0_seq1	55	(T)^10	65	Mononucleotide	Reverse: complement of A
comp81670_c1_seq1	15	(A)^10	25	Mononucleotide	Forward
comp81670_c1_seq1	842	(A)^10	852	Mononucleotide	Forward
comp60198_c0_seq1	80	(T)^10	90	Mononucleotide	Reverse: complement of A
comp690070_c0_seq1	32	(A)^10	42	Mononucleotide	Forward
comp86403_c1_seq1	37	(T)^10	47	Mononucleotide	Reverse: complement of A
comp49975_c0_seq1	168	(A)^11	179	Mononucleotide	Forward
comp49975_c0_seq1	191	(A)^13	204	Mononucleotide	Forward
comp96711_c0_seq1	434	(T)^11	445	Mononucleotide	Reverse: complement of A
comp310842_c0_seq1	540	(T)^12	552	Mononucleotide	Reverse: complement of A
comp310842_c0_seq1	65	(A)^14	79	Mononucleotide	Forward
comp96684_c2_seq1	433	(A)^10	443	Mononucleotide	Forward
comp2236_c0_seq1	6	(A)^10	16	Mononucleotide	Forward
comp99290_c0_seq1	1149	(T)^12	1161	Mononucleotide	Reverse: complement of A
comp99290_c0_seq1	1129	(T)^10	1139	Mononucleotide	Reverse: complement of A
comp44101_c0_seq1	1010	(T)^10	1020	Mononucleotide	Reverse: complement of A
comp97747_c0_seq1	1704	(T)^10	1714	Mononucleotide	Reverse: complement of A
comp97085_c0_seq1	41	(A)^10	51	Mononucleotide	Forward
comp93602_c1_seq1	342	(A)^10	352	Mononucleotide	Forward
comp369790_c0_seq1	10	(A)^10	20	Mononucleotide	Forward
comp98490_c0_seq1	462	(A)^10	472	Mononucleotide	Forward
comp59936_c1_seq1	1070	(T)^10	1080	Mononucleotide	Reverse: complement of A
comp104017_c0_seq1	121	(A)^11	132	Mononucleotide	Forward
comp64851_c0_seq1	159	(A)^10	169	Mononucleotide	Forward
comp269785_c0_seq1	10	(A)^10	20	Mononucleotide	Forward
comp269785_c0_seq1	46	(A)^10	56	Mononucleotide	Forward
comp81518_c0_seq1	1225	(A)^10	1235	Mononucleotide	Forward
comp2601_c0_seq1	577	(A)^12	589	Mononucleotide	Forward
comp148658_c0_seq1	1	(A)^11	12	Mononucleotide	Forward
comp90594_c0_seq1	7	(A)^10	17	Mononucleotide	Forward
comp96635_c0_seq1	32	(A)^10	42	Mononucleotide	Forward
comp88500_c0_seq1	1	(T)^11	12	Mononucleotide	Reverse: complement of A
comp3009_c0_seq1	556	(A)^12	568	Mononucleotide	Forward
comp102431_c0_seq1	201	(T)^10	211	Mononucleotide	Reverse: complement of A
comp99672_c2_seq1	1695	(A)^10	1705	Mononucleotide	Forward
comp25855_c0_seq1	60	(A)^10	70	Mononucleotide	Forward
comp95833_c0_seq1	139	(A)^13	152	Mononucleotide	Forward
comp33179_c0_seq1	742	(T)^11	753	Mononucleotide	Reverse: complement of A
comp33179_c0_seq1	529	(T)^10	539	Mononucleotide	Reverse: complement of A
comp94577_c1_seq1	550	(A)^15	565	Mononucleotide	Forward
comp76300_c0_seq1	147	(A)^10	157	Mononucleotide	Forward
comp89320_c0_seq1	1073	(A)^10	1083	Mononucleotide	Forward
comp106707_c0_seq1	55	(A)^10	65	Mononucleotide	Forward
comp93495_c0_seq1	2119	(A)^10	2129	Mononucleotide	Forward
comp66721_c0_seq1	12	(T)^10	22	Mononucleotide	Reverse: complement of A
comp766637_c0_seq1	196	(T)^11	207	Mononucleotide	Reverse: complement of A
comp59740_c0_seq1	442	(A)^10	452	Mononucleotide	Forward
comp117049_c0_seq1	494	(T)^10	504	Mononucleotide	Reverse: complement of A
comp55998_c0_seq1	188	(A)^10	198	Mononucleotide	Forward
comp104051_c0_seq1	1	(T)^11	12	Mononucleotide	Reverse: complement of A
comp71842_c0_seq1	598	(T)^10	608	Mononucleotide	Reverse: complement of A
comp67947_c1_seq1	1	(A)^10	11	Mononucleotide	Forward
comp72606_c0_seq1	79	(A)^11	90	Mononucleotide	Forward
comp100474_c1_seq1	60	(A)^10	70	Mononucleotide	Forward
comp91798_c0_seq1	2	(T)^21	23	Mononucleotide	Reverse: complement of A
comp28846_c0_seq1	1	(A)^11	12	Mononucleotide	Forward
comp83085_c0_seq1	72	(T)^10	82	Mononucleotide	Reverse: complement of A
comp95124_c1_seq1	330	(A)^10	340	Mononucleotide	Forward
comp70194_c0_seq1	1	(A)^18	19	Mononucleotide	Forward
comp780337_c0_seq1	10	(A)^13	23	Mononucleotide	Forward
comp94379_c0_seq1	1	(A)^16	17	Mononucleotide	Forward
comp63655_c0_seq1	386	(T)^10	396	Mononucleotide	Reverse: complement of A
comp56503_c0_seq1	549	(T)^10	559	Mononucleotide	Reverse: complement of A
comp59960_c0_seq1	1709	(A)^10	1719	Mononucleotide	Forward
comp295809_c0_seq1	327	(T)^11	338	Mononucleotide	Reverse: complement of A
comp92037_c0_seq1	1110	(T)^10	1120	Mononucleotide	Reverse: complement of A
comp85472_c0_seq1	1484	(T)^10	1494	Mononucleotide	Reverse: complement of A
comp97818_c0_seq1	266	(T)^11	277	Mononucleotide	Reverse: complement of A
comp74421_c0_seq1	2034	(A)^12	2046	Mononucleotide	Forward
comp75432_c0_seq1	652	(T)^16	668	Mononucleotide	Reverse: complement of A
comp102101_c0_seq1	61	(A)^10	71	Mononucleotide	Forward
comp30080_c0_seq1	3937	(A)^10	3947	Mononucleotide	Forward
comp56873_c0_seq1	416	(A)^12	428	Mononucleotide	Forward
comp101519_c0_seq1	468	(A)^11	479	Mononucleotide	Forward
comp84242_c0_seq1	678	(A)^10	688	Mononucleotide	Forward
comp63960_c0_seq1	96	(A)^11	107	Mononucleotide	Forward
comp83852_c0_seq1	1	(T)^14	15	Mononucleotide	Reverse: complement of A
comp49191_c0_seq1	1801	(A)^10	1811	Mononucleotide	Forward
comp49191_c0_seq1	80	(T)^12	92	Mononucleotide	Reverse: complement of A
comp231755_c0_seq1	4	(A)^13	17	Mononucleotide	Forward
comp41996_c0_seq1	41	(T)^12	53	Mononucleotide	Reverse: complement of A
comp91281_c1_seq1	2490	(T)^12	2502	Mononucleotide	Reverse: complement of A
comp83313_c0_seq1	134	(A)^10	144	Mononucleotide	Forward
comp94810_c0_seq1	244	(A)^15	259	Mononucleotide	Forward
comp83393_c0_seq1	267	(T)^13	280	Mononucleotide	Reverse: complement of A
comp35402_c0_seq1	63	(G)^10	73	Mononucleotide	Reverse: complement of C
comp99357_c0_seq1	7770	(A)^10	7780	Mononucleotide	Forward
comp74610_c0_seq1	517	(A)^11	528	Mononucleotide	Forward
comp91678_c0_seq1	1392	(T)^10	1402	Mononucleotide	Reverse: complement of A
comp97644_c1_seq1	2625	(A)^10	2635	Mononucleotide	Forward
comp94698_c0_seq1	3964	(T)^11	3975	Mononucleotide	Reverse: complement of A
comp87958_c0_seq1	8	(T)^16	24	Mononucleotide	Reverse: complement of A
comp84913_c0_seq1	948	(T)^11	959	Mononucleotide	Reverse: complement of A
comp92404_c0_seq1	2287	(T)^21	2308	Mononucleotide	Reverse: complement of A
comp92479_c0_seq1	24	(A)^10	34	Mononucleotide	Forward
comp76796_c0_seq1	1	(A)^12	13	Mononucleotide	Forward
comp305950_c0_seq1	322	(T)^10	332	Mononucleotide	Reverse: complement of A
comp101831_c0_seq1	889	(T)^11	900	Mononucleotide	Reverse: complement of A
comp84361_c0_seq1	46	(A)^10	56	Mononucleotide	Forward
comp83353_c0_seq1	1	(A)^10	11	Mononucleotide	Forward
comp92959_c0_seq1	453	(A)^10	463	Mononucleotide	Forward
comp121473_c0_seq1	1	(G)^11	12	Mononucleotide	Reverse: complement of C
comp69804_c0_seq1	773	(T)^10	783	Mononucleotide	Reverse: complement of A
comp88489_c0_seq1	2821	(A)^14	2835	Mononucleotide	Forward
comp47966_c0_seq1	5	(A)^16	21	Mononucleotide	Forward
comp71913_c1_seq1	1	(A)^12	13	Mononucleotide	Forward
comp87552_c0_seq1	1	(A)^10	11	Mononucleotide	Forward
comp24513_c0_seq1	123	(A)^10	133	Mononucleotide	Forward
comp86094_c0_seq1	230	(A)^11	241	Mononucleotide	Forward
comp326_c0_seq1	488	(A)^10	498	Mononucleotide	Forward
comp93349_c0_seq1	27	(A)^10	37	Mononucleotide	Forward
comp96822_c0_seq1	1112	(T)^10	1122	Mononucleotide	Reverse: complement of A
comp85666_c0_seq1	1368	(A)^11	1379	Mononucleotide	Forward
comp44008_c0_seq1	2020	(T)^18	2038	Mononucleotide	Reverse: complement of A
comp105156_c0_seq1	113	(A)^10	123	Mononucleotide	Forward
comp95032_c0_seq1	1248	(T)^10	1258	Mononucleotide	Reverse: complement of A
comp452625_c0_seq1	702	(A)^14	716	Mononucleotide	Forward
comp983234_c0_seq1	547	(A)^10	557	Mononucleotide	Forward
comp1564_c0_seq1	91	(T)^10	101	Mononucleotide	Reverse: complement of A
comp43188_c0_seq1	734	(A)^10	744	Mononucleotide	Forward
comp80206_c0_seq1	1	(A)^13	14	Mononucleotide	Forward
comp80206_c0_seq1	17	(A)^13	30	Mononucleotide	Forward
comp99453_c0_seq1	466	(A)^10	476	Mononucleotide	Forward
comp99453_c0_seq1	1927	(T)^12	1939	Mononucleotide	Reverse: complement of A
comp99453_c0_seq1	4069	(A)^12	4081	Mononucleotide	Forward
comp80134_c1_seq1	1279	(A)^12	1291	Mononucleotide	Forward
comp98874_c0_seq1	383	(A)^10	393	Mononucleotide	Forward
comp90485_c0_seq1	787	(T)^10	797	Mononucleotide	Reverse: complement of A
comp127506_c0_seq1	42	(A)^12	54	Mononucleotide	Forward
comp102107_c1_seq1	1932	(T)^11	1943	Mononucleotide	Reverse: complement of A
comp475251_c0_seq1	685	(A)^11	696	Mononucleotide	Forward
comp89623_c0_seq1	1137	(A)^12	1149	Mononucleotide	Forward
comp33836_c0_seq1	1	(A)^20	21	Mononucleotide	Forward
comp93068_c1_seq1	138	(T)^11	149	Mononucleotide	Reverse: complement of A
comp97103_c0_seq1	425	(T)^10	435	Mononucleotide	Reverse: complement of A
comp96637_c1_seq1	752	(T)^10	762	Mononucleotide	Reverse: complement of A
comp96637_c1_seq1	334	(A)^10	344	Mononucleotide	Forward
comp72472_c0_seq1	1868	(T)^10	1878	Mononucleotide	Reverse: complement of A
comp3110_c1_seq1	60	(T)^10	70	Mononucleotide	Reverse: complement of A
comp95369_c0_seq1	1298	(T)^10	1308	Mononucleotide	Reverse: complement of A
comp95984_c0_seq1	862	(A)^10	872	Mononucleotide	Forward
comp99987_c3_seq1	80	(A)^10	90	Mononucleotide	Forward
comp28973_c0_seq1	259	(A)^10	269	Mononucleotide	Forward
comp28973_c0_seq1	322	(A)^17	339	Mononucleotide	Forward
comp87896_c0_seq1	1	(T)^16	17	Mononucleotide	Reverse: complement of A
comp554204_c0_seq1	484	(T)^10	494	Mononucleotide	Reverse: complement of A
comp71986_c1_seq1	77	(T)^16	93	Mononucleotide	Reverse: complement of A
comp93989_c0_seq1	622	(A)^10	632	Mononucleotide	Forward
comp100010_c4_seq1	493	(T)^10	503	Mononucleotide	Reverse: complement of A
comp59991_c0_seq1	667	(A)^10	677	Mononucleotide	Forward
comp102991_c1_seq1	655	(A)^12	667	Mononucleotide	Forward
comp102991_c1_seq1	492	(T)^10	502	Mononucleotide	Reverse: complement of A
comp161563_c0_seq1	112	(T)^11	123	Mononucleotide	Reverse: complement of A
comp81114_c1_seq1	1838	(T)^10	1848	Mononucleotide	Reverse: complement of A
comp143882_c0_seq1	448	(A)^10	458	Mononucleotide	Forward
comp64219_c0_seq1	1	(T)^11	12	Mononucleotide	Reverse: complement of A
comp72575_c0_seq1	2001	(T)^10	2011	Mononucleotide	Reverse: complement of A
comp91749_c0_seq1	711	(A)^10	721	Mononucleotide	Forward
comp91749_c0_seq1	1021	(A)^13	1034	Mononucleotide	Forward
comp56696_c1_seq1	999	(T)^10	1009	Mononucleotide	Reverse: complement of A
comp29621_c0_seq1	1909	(T)^14	1923	Mononucleotide	Reverse: complement of A
comp26711_c0_seq1	3148	(A)^10	3158	Mononucleotide	Forward
comp26711_c0_seq1	3344	(A)^10	3354	Mononucleotide	Forward
comp94701_c1_seq1	1619	(A)^14	1633	Mononucleotide	Forward
comp16795_c0_seq1	191	(A)^11	202	Mononucleotide	Forward
comp94858_c0_seq1	3413	(T)^10	3423	Mononucleotide	Reverse: complement of A
comp85636_c0_seq1	196	(T)^10	206	Mononucleotide	Reverse: complement of A
comp81109_c0_seq1	236	(A)^11	247	Mononucleotide	Forward
comp9362_c0_seq1	703	(A)^10	713	Mononucleotide	Forward
comp91757_c0_seq1	535	(T)^11	546	Mononucleotide	Reverse: complement of A
comp92242_c0_seq1	177	(A)^15	192	Mononucleotide	Forward
comp83748_c0_seq1	1077	(T)^15	1092	Mononucleotide	Reverse: complement of A
comp83748_c0_seq1	1304	(A)^10	1314	Mononucleotide	Forward
comp59751_c0_seq1	350	(A)^11	361	Mononucleotide	Forward
comp96343_c2_seq1	501	(T)^10	511	Mononucleotide	Reverse: complement of A
comp81804_c0_seq1	775	(T)^13	788	Mononucleotide	Reverse: complement of A
comp100240_c2_seq1	1493	(T)^10	1503	Mononucleotide	Reverse: complement of A
comp997310_c0_seq1	10	(T)^11	21	Mononucleotide	Reverse: complement of A
comp141661_c0_seq1	532	(T)^11	543	Mononucleotide	Reverse: complement of A
comp103375_c1_seq1	1092	(T)^12	1104	Mononucleotide	Reverse: complement of A
comp28326_c0_seq1	155	(A)^10	165	Mononucleotide	Forward
comp89342_c0_seq1	1125	(T)^11	1136	Mononucleotide	Reverse: complement of A
comp87345_c0_seq1	959	(A)^10	969	Mononucleotide	Forward
comp57057_c0_seq1	9	(T)^11	20	Mononucleotide	Reverse: complement of A
comp84521_c0_seq1	35	(T)^13	48	Mononucleotide	Reverse: complement of A
comp99624_c1_seq1	2809	(A)^10	2819	Mononucleotide	Forward
comp396_c0_seq1	961	(T)^10	971	Mononucleotide	Reverse: complement of A
comp95387_c0_seq1	821	(T)^11	832	Mononucleotide	Reverse: complement of A
comp98247_c5_seq1	375	(T)^11	386	Mononucleotide	Reverse: complement of A
comp490716_c0_seq1	684	(T)^10	694	Mononucleotide	Reverse: complement of A
comp490716_c0_seq1	643	(A)^11	654	Mononucleotide	Forward
comp20557_c0_seq1	827	(T)^13	840	Mononucleotide	Reverse: complement of A
comp74461_c0_seq1	1	(A)^18	19	Mononucleotide	Forward
comp98314_c1_seq1	1	(T)^18	19	Mononucleotide	Reverse: complement of A
comp97786_c1_seq1	753	(T)^10	763	Mononucleotide	Reverse: complement of A
comp97786_c1_seq1	510	(A)^11	521	Mononucleotide	Forward
comp97786_c1_seq1	4	(T)^13	17	Mononucleotide	Reverse: complement of A
comp97786_c1_seq1	982	(A)^12	994	Mononucleotide	Forward
comp100510_c0_seq1	1260	(A)^11	1271	Mononucleotide	Forward
comp90401_c0_seq1	13	(T)^10	23	Mononucleotide	Reverse: complement of A
comp78012_c0_seq1	1651	(T)^10	1661	Mononucleotide	Reverse: complement of A
comp22976_c0_seq1	701	(T)^17	718	Mononucleotide	Reverse: complement of A
comp85219_c0_seq1	567	(A)^10	577	Mononucleotide	Forward
comp37106_c0_seq1	1	(A)^18	19	Mononucleotide	Forward
comp92681_c0_seq1	859	(T)^12	871	Mononucleotide	Reverse: complement of A
comp86517_c0_seq1	931	(A)^11	942	Mononucleotide	Forward
comp102497_c0_seq1	11	(T)^13	24	Mononucleotide	Reverse: complement of A
comp99354_c0_seq1	472	(A)^12	484	Mononucleotide	Forward
comp55784_c0_seq1	345	(T)^10	355	Mononucleotide	Reverse: complement of A
comp104374_c0_seq1	777	(A)^10	787	Mononucleotide	Forward
comp634813_c0_seq1	347	(T)^10	357	Mononucleotide	Reverse: complement of A
comp96332_c0_seq1	1	(T)^15	16	Mononucleotide	Reverse: complement of A
comp691394_c0_seq1	294	(A)^10	304	Mononucleotide	Forward
comp59983_c1_seq1	442	(A)^11	453	Mononucleotide	Forward
comp85507_c0_seq1	1779	(A)^10	1789	Mononucleotide	Forward
comp25620_c0_seq1	246	(T)^10	256	Mononucleotide	Reverse: complement of A
comp80958_c0_seq1	366	(A)^11	377	Mononucleotide	Forward
comp73495_c0_seq1	151	(A)^10	161	Mononucleotide	Forward
comp76785_c0_seq1	505	(T)^12	517	Mononucleotide	Reverse: complement of A
comp97136_c0_seq1	416	(A)^10	426	Mononucleotide	Forward
comp84517_c0_seq1	1828	(T)^11	1839	Mononucleotide	Reverse: complement of A
comp779615_c0_seq1	213	(A)^10	223	Mononucleotide	Forward
comp104969_c0_seq1	186	(A)^11	197	Mononucleotide	Forward
comp104969_c0_seq1	1021	(T)^13	1034	Mononucleotide	Reverse: complement of A
comp76456_c0_seq1	475	(A)^11	486	Mononucleotide	Forward
comp69571_c0_seq1	712	(A)^10	722	Mononucleotide	Forward
comp32489_c0_seq1	446	(T)^10	456	Mononucleotide	Reverse: complement of A
comp95407_c1_seq1	679	(T)^13	692	Mononucleotide	Reverse: complement of A
comp102942_c0_seq1	558	(T)^10	568	Mononucleotide	Reverse: complement of A
comp102942_c0_seq1	839	(A)^11	850	Mononucleotide	Forward
comp74262_c0_seq1	8	(A)^10	18	Mononucleotide	Forward
comp57879_c0_seq1	751	(T)^10	761	Mononucleotide	Reverse: complement of A
comp646767_c0_seq1	220	(A)^13	233	Mononucleotide	Forward
comp45609_c0_seq1	51	(A)^11	62	Mononucleotide	Forward
comp96212_c0_seq1	1964	(T)^10	1974	Mononucleotide	Reverse: complement of A
comp86065_c0_seq1	1078	(A)^12	1090	Mononucleotide	Forward
comp87232_c0_seq1	1823	(T)^11	1834	Mononucleotide	Reverse: complement of A
comp87232_c0_seq1	1862	(A)^10	1872	Mononucleotide	Forward
comp99250_c0_seq1	297	(T)^10	307	Mononucleotide	Reverse: complement of A
comp101486_c3_seq1	2169	(A)^10	2179	Mononucleotide	Forward
comp106426_c0_seq1	1764	(T)^10	1774	Mononucleotide	Reverse: complement of A
comp92610_c0_seq1	1	(T)^10	11	Mononucleotide	Reverse: complement of A
comp93024_c0_seq1	997	(T)^10	1007	Mononucleotide	Reverse: complement of A
comp499608_c0_seq1	48	(T)^10	58	Mononucleotide	Reverse: complement of A
comp499608_c0_seq1	1	(T)^11	12	Mononucleotide	Reverse: complement of A
comp31651_c0_seq1	1131	(A)^13	1144	Mononucleotide	Forward
comp81758_c0_seq1	1342	(T)^10	1352	Mononucleotide	Reverse: complement of A
comp88755_c0_seq1	1349	(A)^10	1359	Mononucleotide	Forward
comp512052_c0_seq1	197	(T)^10	207	Mononucleotide	Reverse: complement of A
comp95610_c0_seq1	315	(T)^10	325	Mononucleotide	Reverse: complement of A
comp41867_c0_seq1	32	(A)^10	42	Mononucleotide	Forward
comp57479_c0_seq1	244	(A)^10	254	Mononucleotide	Forward
comp103483_c0_seq1	1420	(T)^12	1432	Mononucleotide	Reverse: complement of A
comp102011_c0_seq1	2248	(T)^11	2259	Mononucleotide	Reverse: complement of A
comp83616_c0_seq1	781	(T)^10	791	Mononucleotide	Reverse: complement of A
comp14562_c0_seq1	318	(A)^11	329	Mononucleotide	Forward
comp70722_c1_seq1	497	(T)^12	509	Mononucleotide	Reverse: complement of A
comp13186_c0_seq1	1	(T)^12	13	Mononucleotide	Reverse: complement of A
comp94419_c0_seq1	67	(T)^10	77	Mononucleotide	Reverse: complement of A
comp77803_c0_seq1	63	(A)^10	73	Mononucleotide	Forward
comp96400_c0_seq1	658	(T)^10	668	Mononucleotide	Reverse: complement of A
comp100390_c0_seq1	564	(A)^11	575	Mononucleotide	Forward
comp100390_c0_seq1	1185	(T)^11	1196	Mononucleotide	Reverse: complement of A
comp78719_c0_seq1	457	(T)^10	467	Mononucleotide	Reverse: complement of A
comp30997_c0_seq1	296	(T)^10	306	Mononucleotide	Reverse: complement of A
comp541206_c0_seq1	533	(A)^11	544	Mononucleotide	Forward
comp91445_c0_seq1	1197	(T)^10	1207	Mononucleotide	Reverse: complement of A
comp94745_c0_seq1	2022	(T)^10	2032	Mononucleotide	Reverse: complement of A
comp97288_c0_seq1	481	(T)^10	491	Mononucleotide	Reverse: complement of A
comp97288_c0_seq1	323	(T)^11	334	Mononucleotide	Reverse: complement of A
comp25200_c0_seq1	28	(T)^16	44	Mononucleotide	Reverse: complement of A
comp102165_c0_seq1	44	(A)^10	54	Mononucleotide	Forward
comp92083_c0_seq1	1330	(T)^11	1341	Mononucleotide	Reverse: complement of A
comp65637_c0_seq1	2309	(A)^11	2320	Mononucleotide	Forward
comp96499_c1_seq1	1236	(T)^11	1247	Mononucleotide	Reverse: complement of A
comp96499_c1_seq1	40	(T)^10	50	Mononucleotide	Reverse: complement of A
comp88360_c0_seq1	736	(A)^10	746	Mononucleotide	Forward
comp27029_c0_seq1	969	(A)^10	979	Mononucleotide	Forward
comp488787_c0_seq1	450	(A)^11	461	Mononucleotide	Forward
comp59209_c0_seq1	536	(T)^10	546	Mononucleotide	Reverse: complement of A
comp95962_c0_seq1	138	(A)^11	149	Mononucleotide	Forward
comp83185_c0_seq1	1808	(T)^12	1820	Mononucleotide	Reverse: complement of A
comp98702_c1_seq1	12	(A)^13	25	Mononucleotide	Forward
comp98702_c1_seq1	1	(T)^11	12	Mononucleotide	Reverse: complement of A
comp114624_c0_seq1	1	(A)^17	18	Mononucleotide	Forward
comp114624_c0_seq1	1087	(T)^10	1097	Mononucleotide	Reverse: complement of A
comp78972_c0_seq1	305	(A)^10	315	Mononucleotide	Forward
comp354291_c0_seq1	549	(T)^11	560	Mononucleotide	Reverse: complement of A
comp73492_c0_seq1	16	(T)^10	26	Mononucleotide	Reverse: complement of A
comp103654_c0_seq1	69	(A)^10	79	Mononucleotide	Forward
comp100688_c0_seq1	228	(T)^10	238	Mononucleotide	Reverse: complement of A
comp526212_c0_seq1	325	(A)^10	335	Mononucleotide	Forward
comp70_c0_seq1	596	(T)^10	606	Mononucleotide	Reverse: complement of A
comp85561_c0_seq1	1710	(T)^10	1720	Mononucleotide	Reverse: complement of A
comp85561_c0_seq1	1698	(T)^10	1708	Mononucleotide	Reverse: complement of A
comp85561_c0_seq1	1008	(T)^10	1018	Mononucleotide	Reverse: complement of A
comp85561_c0_seq1	997	(T)^10	1007	Mononucleotide	Reverse: complement of A
comp63353_c0_seq1	1222	(T)^10	1232	Mononucleotide	Reverse: complement of A
comp63353_c0_seq1	41	(T)^10	51	Mononucleotide	Reverse: complement of A
comp87144_c0_seq1	579	(A)^10	589	Mononucleotide	Forward
comp16277_c0_seq1	76	(A)^10	86	Mononucleotide	Forward
comp96413_c0_seq1	2922	(T)^11	2933	Mononucleotide	Reverse: complement of A
comp89505_c1_seq1	2547	(A)^10	2557	Mononucleotide	Forward
comp87466_c0_seq1	857	(T)^16	873	Mononucleotide	Reverse: complement of A
comp99491_c0_seq1	412	(T)^10	422	Mononucleotide	Reverse: complement of A
comp99491_c0_seq1	58	(T)^10	68	Mononucleotide	Reverse: complement of A
comp85415_c0_seq1	307	(A)^13	320	Mononucleotide	Forward
comp86037_c0_seq1	1833	(A)^11	1844	Mononucleotide	Forward
comp88187_c0_seq1	1	(A)^21	22	Mononucleotide	Forward
comp102186_c0_seq1	1917	(A)^11	1928	Mononucleotide	Forward
comp96923_c0_seq1	204	(A)^10	214	Mononucleotide	Forward
comp7580_c0_seq1	41	(A)^10	51	Mononucleotide	Forward
comp89801_c2_seq1	3	(A)^10	13	Mononucleotide	Forward
comp89801_c2_seq1	112	(A)^12	124	Mononucleotide	Forward
comp89801_c2_seq1	811	(A)^11	822	Mononucleotide	Forward
comp101257_c0_seq1	1783	(A)^10	1793	Mononucleotide	Forward
comp73362_c0_seq1	2944	(A)^13	2957	Mononucleotide	Forward
comp96815_c0_seq1	1863	(T)^11	1874	Mononucleotide	Reverse: complement of A
comp100099_c3_seq1	8	(T)^11	19	Mononucleotide	Reverse: complement of A
comp96525_c4_seq1	1	(A)^15	16	Mononucleotide	Forward
comp91407_c0_seq1	1096	(T)^10	1106	Mononucleotide	Reverse: complement of A
comp93106_c0_seq1	1449	(A)^10	1459	Mononucleotide	Forward
comp113330_c0_seq1	430	(A)^10	440	Mononucleotide	Forward
comp91299_c0_seq1	51	(A)^12	63	Mononucleotide	Forward
comp399664_c0_seq1	78	(A)^11	89	Mononucleotide	Forward
comp85101_c0_seq1	2058	(T)^12	2070	Mononucleotide	Reverse: complement of A
comp18823_c0_seq1	595	(A)^11	606	Mononucleotide	Forward
comp84820_c0_seq1	435	(A)^10	445	Mononucleotide	Forward
comp103851_c0_seq1	1	(A)^18	19	Mononucleotide	Forward
comp103851_c0_seq1	1628	(A)^11	1639	Mononucleotide	Forward
comp94828_c0_seq1	2357	(A)^10	2367	Mononucleotide	Forward
comp95816_c0_seq1	717	(T)^10	727	Mononucleotide	Reverse: complement of A
comp51619_c0_seq1	87	(T)^10	97	Mononucleotide	Reverse: complement of A
comp9373_c0_seq1	8	(A)^12	20	Mononucleotide	Forward
comp9373_c0_seq1	122	(T)^13	135	Mononucleotide	Reverse: complement of A
comp96055_c0_seq1	1461	(T)^10	1471	Mononucleotide	Reverse: complement of A
comp89622_c0_seq1	1	(A)^19	20	Mononucleotide	Forward
comp100230_c0_seq1	1651	(T)^22	1673	Mononucleotide	Reverse: complement of A
comp92235_c0_seq1	2256	(T)^10	2266	Mononucleotide	Reverse: complement of A
comp98214_c2_seq1	85	(T)^10	95	Mononucleotide	Reverse: complement of A
comp89482_c1_seq1	662	(A)^10	672	Mononucleotide	Forward
comp38810_c0_seq1	422	(A)^10	432	Mononucleotide	Forward
comp82457_c1_seq1	253	(A)^10	263	Mononucleotide	Forward
comp51108_c0_seq1	2	(A)^11	13	Mononucleotide	Forward
comp51108_c0_seq1	14	(A)^10	24	Mononucleotide	Forward
comp107753_c0_seq1	515	(T)^15	530	Mononucleotide	Reverse: complement of A
comp793_c0_seq1	10	(A)^10	20	Mononucleotide	Forward
comp793_c0_seq1	393	(A)^10	403	Mononucleotide	Forward
comp99539_c0_seq1	2137	(A)^11	2148	Mononucleotide	Forward
comp105822_c0_seq1	850	(A)^13	863	Mononucleotide	Forward
comp681957_c0_seq1	348	(T)^12	360	Mononucleotide	Reverse: complement of A
comp681957_c0_seq1	292	(T)^10	302	Mononucleotide	Reverse: complement of A
comp259019_c0_seq1	425	(T)^10	435	Mononucleotide	Reverse: complement of A
comp110334_c0_seq1	422	(T)^10	432	Mononucleotide	Reverse: complement of A
comp85080_c0_seq1	215	(A)^10	225	Mononucleotide	Forward
comp85080_c0_seq1	1306	(A)^10	1316	Mononucleotide	Forward
comp85080_c0_seq1	1714	(A)^10	1724	Mononucleotide	Forward
comp89764_c0_seq1	838	(T)^10	848	Mononucleotide	Reverse: complement of A
comp101843_c0_seq1	647	(T)^10	657	Mononucleotide	Reverse: complement of A
comp86386_c0_seq1	34	(A)^13	47	Mononucleotide	Forward
comp58226_c0_seq1	484	(T)^11	495	Mononucleotide	Reverse: complement of A
comp105001_c0_seq1	1034	(T)^16	1050	Mononucleotide	Reverse: complement of A
comp68511_c0_seq1	1	(A)^19	20	Mononucleotide	Forward
comp84099_c0_seq1	1752	(A)^11	1763	Mononucleotide	Forward
comp872737_c0_seq1	1	(T)^12	13	Mononucleotide	Reverse: complement of A
comp89082_c0_seq1	1	(A)^12	13	Mononucleotide	Forward
comp75146_c0_seq1	378	(T)^15	393	Mononucleotide	Reverse: complement of A
comp75146_c0_seq1	1049	(A)^14	1063	Mononucleotide	Forward
comp105694_c0_seq1	2	(A)^12	14	Mononucleotide	Forward
comp66634_c0_seq1	1	(A)^14	15	Mononucleotide	Forward
comp25658_c0_seq1	1193	(A)^11	1204	Mononucleotide	Forward
comp54625_c0_seq1	615	(T)^12	627	Mononucleotide	Reverse: complement of A
comp155417_c0_seq1	481	(T)^10	491	Mononucleotide	Reverse: complement of A
comp55483_c1_seq1	798	(T)^10	808	Mononucleotide	Reverse: complement of A
comp57528_c0_seq1	67	(A)^12	79	Mononucleotide	Forward
comp92874_c0_seq1	672	(T)^10	682	Mononucleotide	Reverse: complement of A
comp215087_c0_seq1	546	(T)^10	556	Mononucleotide	Reverse: complement of A
comp77825_c0_seq1	1033	(T)^10	1043	Mononucleotide	Reverse: complement of A
comp106591_c0_seq1	1427	(T)^10	1437	Mononucleotide	Reverse: complement of A
comp91310_c1_seq1	57	(A)^10	67	Mononucleotide	Forward
comp91310_c1_seq1	1112	(T)^10	1122	Mononucleotide	Reverse: complement of A
comp39555_c0_seq1	919	(A)^10	929	Mononucleotide	Forward
comp87690_c0_seq1	642	(A)^16	658	Mononucleotide	Forward
comp99711_c0_seq1	1917	(T)^10	1927	Mononucleotide	Reverse: complement of A
comp85061_c0_seq1	1854	(T)^10	1864	Mononucleotide	Reverse: complement of A
comp92610_c1_seq1	23	(A)^10	33	Mononucleotide	Forward
comp80881_c0_seq1	72	(A)^10	82	Mononucleotide	Forward
comp85397_c0_seq1	89	(T)^10	99	Mononucleotide	Reverse: complement of A
comp88508_c0_seq1	317	(A)^10	327	Mononucleotide	Forward
comp66427_c0_seq1	704	(A)^12	716	Mononucleotide	Forward
comp89847_c0_seq1	148	(A)^13	161	Mononucleotide	Forward
comp395917_c0_seq1	1	(A)^14	15	Mononucleotide	Forward
comp7641_c0_seq1	1112	(A)^13	1125	Mononucleotide	Forward
comp98446_c1_seq1	1019	(A)^12	1031	Mononucleotide	Forward
comp93455_c0_seq1	1255	(T)^10	1265	Mononucleotide	Reverse: complement of A
comp93404_c0_seq1	633	(T)^12	645	Mononucleotide	Reverse: complement of A
comp63715_c0_seq1	54	(T)^11	65	Mononucleotide	Reverse: complement of A
comp97023_c0_seq1	16	(A)^11	27	Mononucleotide	Forward
comp101904_c0_seq1	50	(A)^13	63	Mononucleotide	Forward
comp101904_c0_seq1	1012	(T)^13	1025	Mononucleotide	Reverse: complement of A
comp60072_c0_seq1	2283	(T)^13	2296	Mononucleotide	Reverse: complement of A
comp98990_c0_seq1	1703	(T)^10	1713	Mononucleotide	Reverse: complement of A
comp100932_c6_seq1	792	(T)^16	808	Mononucleotide	Reverse: complement of A
comp94762_c0_seq1	1848	(T)^11	1859	Mononucleotide	Reverse: complement of A
comp66457_c0_seq1	449	(T)^11	460	Mononucleotide	Reverse: complement of A
comp89422_c0_seq1	1480	(T)^11	1491	Mononucleotide	Reverse: complement of A
comp89422_c0_seq1	536	(T)^12	548	Mononucleotide	Reverse: complement of A
comp100623_c0_seq1	179	(T)^11	190	Mononucleotide	Reverse: complement of A
comp102886_c5_seq1	1459	(A)^10	1469	Mononucleotide	Forward
comp1018842_c0_seq1	462	(A)^10	472	Mononucleotide	Forward
comp90185_c0_seq1	1704	(A)^11	1715	Mononucleotide	Forward
comp100211_c0_seq1	1566	(T)^11	1577	Mononucleotide	Reverse: complement of A
comp100211_c0_seq1	967	(T)^13	980	Mononucleotide	Reverse: complement of A
comp100211_c0_seq1	393	(T)^13	406	Mononucleotide	Reverse: complement of A
comp70633_c0_seq1	2011	(T)^12	2023	Mononucleotide	Reverse: complement of A
comp82641_c0_seq1	1	(A)^14	15	Mononucleotide	Forward
comp90583_c0_seq1	409	(A)^12	421	Mononucleotide	Forward
comp2363_c1_seq1	197	(T)^10	207	Mononucleotide	Reverse: complement of A
comp39749_c0_seq1	47	(T)^15	62	Mononucleotide	Reverse: complement of A
comp418642_c0_seq1	151	(T)^10	161	Mononucleotide	Reverse: complement of A
comp62701_c0_seq1	742	(T)^12	754	Mononucleotide	Reverse: complement of A
comp73818_c0_seq1	2240	(T)^10	2250	Mononucleotide	Reverse: complement of A
comp73818_c0_seq1	1713	(A)^11	1724	Mononucleotide	Forward
comp68593_c0_seq1	9	(A)^10	19	Mononucleotide	Forward
comp102793_c1_seq1	9	(A)^13	22	Mononucleotide	Forward
comp67624_c1_seq1	225	(T)^11	236	Mononucleotide	Reverse: complement of A
comp118688_c0_seq1	34	(A)^14	48	Mononucleotide	Forward
comp99525_c0_seq1	1	(A)^19	20	Mononucleotide	Forward
comp101563_c3_seq1	1568	(A)^10	1578	Mononucleotide	Forward
[truncated: 9,635 more rows]
