# Supplementary material for: De Novo Assembly and Transcriptome Analysis of Bulb Onion (Allium cepa L.) during Cold Acclimation Using Contrasting Genotypes
Source: PLoS One. 2016 Sep 14;11(9):e0161987. doi: 10.1371/journal.pone.0161987 (PMC5023330; doi:10.1371/journal.pone.0161987)
Supplement: S6 Table — (XLSX) [file pone.0161987.s012.xlsx]

## Sheet: SNPs
Supplementary Table 6 The number of SNP transistion and transversion observed in A. cepa transcriptomes
SNP type	CS(25)	CT(25)
Transistion
A/G	32612	28222
C/T	30164	25376
	62776	53598
Transversion
A/C	9174	8649
A/T	13340	11698
G/C	5771	4923
G/T	8445	7342
	36730	32612

## Sheet: CT25°C
contig/scafford ID	snp_position	ref_base	alt_base	genotype	snp_quality	tot_depth	alt_depth
comp103320_c0_seq1	25	A	C	M	215.95	8	7
comp103320_c0_seq1	46	T	C	Y	368.78	15	11
comp103320_c0_seq1	79	T	A	W	368.82	15	11
comp103320_c0_seq1	161	A	T	W	251.81	14	8
comp103320_c0_seq1	171	C	T	Y	248.8	15	8
comp103320_c0_seq1	173	A	G	R	254.82	13	8
comp103320_c0_seq1	193	A	G	R	151.06	14	6
comp103320_c0_seq1	199	C	T	Y	120.64	13	5
comp103320_c0_seq1	271	C	A	M	128.18	20	5
comp103320_c0_seq1	280	A	T	W	131.19	18	5
comp103320_c0_seq1	289	C	T	Y	433	18	13
comp103320_c0_seq1	330	T	C	Y	334.42	17	10
comp103320_c0_seq1	359	A	C	M	222.34	18	9
comp103320_c0_seq1	373	A	C	M	276.81	20	10
comp103320_c0_seq1	377	A	G	R	169.31	19	8
comp103320_c0_seq1	384	C	T	T	524.64	18	18
comp103320_c0_seq1	406	A	G	R	252.36	18	9
comp103320_c0_seq1	420	C	A	M	190.32	17	7
comp103320_c0_seq1	425	T	C	C	458.09	13	13
comp103320_c0_seq1	439	A	G	R	280.11	15	10
comp103320_c0_seq1	531	G	A	A	335.72	10	10
comp103320_c0_seq1	697	G	A	R	45.49	14	3
comp103320_c0_seq1	698	G	A	R	45.49	14	3
comp103320_c0_seq1	789	G	A	R	210.95	11	7
comp103320_c0_seq1	802	A	G	R	93.26	12	5
comp103320_c0_seq1	822	A	G	G	436.09	12	12
comp103320_c0_seq1	835	C	T	Y	291.34	12	8
comp103320_c0_seq1	841	G	A	R	48.5	11	3
comp103320_c0_seq1	929	T	C	Y	59.83	14	4
comp103320_c0_seq1	998	G	A	R	272.36	14	9
comp103320_c0_seq1	1000	A	G	R	272.36	14	9
comp103320_c0_seq1	1010	G	A	R	81.93	11	4
comp103320_c0_seq1	1038	A	T	W	32.01	9	2
comp103320_c0_seq1	1039	T	G	K	32.01	9	2
comp103320_c0_seq1	1055	T	C	C	152.3	5	5
comp406605_c0_seq1	106	A	C	M	44.41	5	2
comp73458_c0_seq1	1767	A	G	R	46.67	4	2
comp93784_c0_seq1	457	T	G	G	1443.35	41	41
comp93784_c0_seq1	541	A	G	G	1214.36	30	30
comp93784_c0_seq1	739	T	C	Y	11.61	16	2
comp93784_c0_seq1	956	G	C	C	946.24	25	25
comp93784_c0_seq1	1076	C	T	T	951.13	25	25
comp93784_c0_seq1	1150	T	C	C	1344.21	34	34
comp93784_c0_seq1	1167	C	G	G	1344.15	32	32
comp93784_c0_seq1	1194	T	C	C	1307.72	31	31
comp93784_c0_seq1	1239	A	G	G	1130.04	29	29
comp93784_c0_seq1	1593	T	A	W	62.04	15	3
comp93784_c0_seq1	1594	T	A	W	65.06	14	3
comp93784_c0_seq1	1595	G	C	S	65.06	14	3
comp104838_c0_seq1	1731	T	A	A	14.88	1	1
comp104838_c0_seq1	1732	T	A	A	14.88	1	1
comp87145_c0_seq1	44	T	C	C	12.05	1	1
comp87145_c0_seq1	315	G	T	T	54.13	2	2
comp87145_c0_seq1	923	G	T	T	14.88	1	1
comp87145_c0_seq1	977	A	G	G	14.88	1	1
comp87145_c0_seq1	1078	A	G	G	14.88	1	1
comp87145_c0_seq1	1100	G	T	T	14.88	1	1
comp97401_c0_seq1	130	A	G	G	34.79	2	2
comp97401_c0_seq1	131	T	C	C	34.79	2	2
comp97401_c0_seq1	133	G	A	A	34.79	2	2
comp97401_c0_seq1	156	G	T	T	209.63	8	8
comp97401_c0_seq1	180	T	C	C	287.21	11	11
comp97401_c0_seq1	219	A	T	T	331.56	12	12
comp97401_c0_seq1	220	T	A	A	361.18	13	13
comp97401_c0_seq1	237	C	T	T	417.2	14	14
comp97401_c0_seq1	268	T	C	C	1403.18	37	37
comp97401_c0_seq1	289	T	C	C	1527.95	43	43
comp97401_c0_seq1	433	A	G	G	1532.57	38	38
comp97401_c0_seq1	1282	A	T	T	1218.92	30	30
comp97401_c0_seq1	1468	G	C	C	1208.03	31	31
comp97401_c0_seq1	1705	T	C	C	816.82	19	19
comp97401_c0_seq1	1712	T	A	W	38.39	7	2
comp75705_c0_seq1	24	G	A	A	14.88	1	1
comp75705_c0_seq1	162	C	A	M	50.43	3	2
comp75705_c0_seq1	423	T	C	Y	50.48	4	3
comp75705_c0_seq1	661	C	T	T	14.92	2	2
comp75705_c0_seq1	1120	T	C	C	14.88	1	1
comp96193_c0_seq1	41	G	A	A	58.21	2	2
comp96193_c0_seq1	58	A	G	G	190.9	5	5
comp96193_c0_seq1	212	A	G	G	4074.75	113	113
comp96193_c0_seq1	266	G	A	A	5470.79	141	141
comp96193_c0_seq1	466	T	C	C	5586.58	148	148
comp96193_c0_seq1	477	G	A	A	5351.56	140	140
comp96193_c0_seq1	588	T	C	C	4559.64	120	120
comp96193_c0_seq1	896	A	C	M	25.44	27	3
comp96193_c0_seq1	971	G	A	A	1431.83	39	39
comp96193_c0_seq1	976	A	G	G	1565.99	42	42
comp96193_c0_seq1	2225	G	A	A	3272.75	85	85
comp96193_c0_seq1	2694	C	A	A	4359.52	111	111
comp96193_c0_seq1	3132	A	G	G	58.21	2	2
comp102192_c3_seq1	53	T	G	G	92.7	3	3
comp102192_c3_seq1	56	A	T	T	136.97	4	4
comp102192_c3_seq1	159	T	G	K	519.7	88	25
comp102192_c3_seq1	165	T	G	K	1369.55	119	58
comp102192_c3_seq1	197	G	C	S	702.07	133	38
comp102192_c3_seq1	206	A	G	R	2191.53	163	85
comp102192_c3_seq1	239	G	C	S	3060.64	200	116
comp102192_c3_seq1	265	C	T	Y	2858.54	191	109
comp102192_c3_seq1	273	C	G	S	2474.36	184	100
comp102192_c3_seq1	274	T	C	Y	2504.79	185	101
comp102192_c3_seq1	275	A	G	R	2573.92	188	103
comp102192_c3_seq1	285	T	C	Y	3965.67	196	129
comp102192_c3_seq1	410	T	C	Y	3841.72	200	121
comp102192_c3_seq1	422	C	T	Y	1512.82	197	54
comp102192_c3_seq1	435	C	T	Y	54.19	188	18
comp102192_c3_seq1	454	G	A	R	1296.67	153	45
comp102192_c3_seq1	505	C	T	T	315.85	9	9
comp102192_c3_seq1	513	G	A	R	73.13	5	3
comp102192_c3_seq1	522	G	A	A	163.59	5	5
comp102192_c3_seq1	535	C	T	Y	33.12	5	2
comp102192_c3_seq1	550	C	T	T	14.88	1	1
comp101734_c1_seq1	318	A	G	G	46.92	2	2
comp101734_c1_seq1	335	T	A	A	46.92	2	2
comp101734_c1_seq1	354	T	C	C	14.88	1	1
comp101734_c1_seq1	451	A	G	G	46.92	2	2
comp101734_c1_seq1	455	G	T	T	90.85	3	3
comp101734_c1_seq1	500	T	G	G	90.85	3	3
comp101734_c1_seq1	505	A	G	G	90.85	3	3
comp101734_c1_seq1	532	G	A	A	112.54	4	4
comp101734_c1_seq1	545	G	A	A	68.27	3	3
comp101734_c1_seq1	551	A	T	T	112.54	4	4
comp101734_c1_seq1	587	A	G	G	290.97	8	8
comp819540_c0_seq1	83	T	C	C	14.88	1	1
comp69633_c0_seq1	679	A	G	G	53.49	2	2
comp59404_c0_seq1	9	T	C	C	14.88	1	1
comp30309_c0_seq1	2	T	C	C	102.15	3	3
comp96924_c0_seq1	854	A	T	T	5460.85	181	159
comp96924_c0_seq1	872	A	G	G	4938.54	159	145
comp96924_c0_seq1	881	T	C	C	10.43	1	1
comp81196_c0_seq1	1134	C	T	T	14.88	1	1
comp310593_c0_seq1	103	T	G	G	10.43	1	1
comp310593_c0_seq1	104	T	G	G	10.43	1	1
comp310593_c0_seq1	423	A	G	G	11.55	1	1
comp97015_c0_seq1	1338	T	G	K	171.47	108	17
comp101766_c2_seq1	109	A	T	W	197.09	12	7
comp101766_c2_seq1	142	G	T	K	172.55	31	8
comp101766_c2_seq1	170	C	T	Y	961.06	43	29
comp101766_c2_seq1	210	T	G	K	313.94	68	16
comp101766_c2_seq1	218	G	A	R	280.75	60	14
comp101766_c2_seq1	262	A	G	R	335.86	54	16
comp101766_c2_seq1	283	C	G	S	281.78	43	14
comp101766_c2_seq1	302	A	G	R	269.41	36	13
comp101766_c2_seq1	340	C	G	S	248.09	36	13
comp101766_c2_seq1	353	C	T	Y	77.61	27	6
comp101766_c2_seq1	355	G	A	R	77.61	27	6
comp101766_c2_seq1	357	C	A	M	77.61	27	6
comp101766_c2_seq1	375	T	C	Y	68.88	26	6
comp101766_c2_seq1	385	T	C	Y	22.81	24	4
comp101766_c2_seq1	490	C	T	Y	1729.27	63	52
comp101766_c2_seq1	535	C	T	Y	264.04	82	17
comp101766_c2_seq1	537	T	C	Y	258.02	85	17
comp101766_c2_seq1	575	T	C	Y	260.41	59	12
comp101766_c2_seq1	600	T	C	Y	132.34	47	8
comp101766_c2_seq1	607	G	A	R	90.62	43	7
comp101766_c2_seq1	616	T	C	Y	72.23	38	6
comp101766_c2_seq1	640	C	T	Y	68.6	27	5
comp80288_c0_seq1	20	A	G	G	14.88	1	1
comp80288_c0_seq1	21	G	A	A	14.88	1	1
comp80288_c0_seq1	2511	C	G	G	14.88	1	1
comp64749_c0_seq1	733	C	G	G	12.49	1	1
comp98846_c0_seq1	149	C	T	T	68.27	3	3
comp98846_c0_seq1	174	A	G	G	212.91	6	6
comp98846_c0_seq1	184	T	C	C	257.57	7	7
comp98846_c0_seq1	215	T	C	C	268.86	7	7
comp98846_c0_seq1	252	A	G	G	236.38	8	8
comp98846_c0_seq1	333	C	G	G	347.02	10	10
comp98846_c0_seq1	345	G	A	R	33.12	5	2
comp98846_c0_seq1	365	C	G,T	K	43.38	3	2
comp98846_c0_seq1	401	A	T	T	46.89	2	2
comp98846_c0_seq1	403	G	A	A	44.42	2	2
comp98846_c0_seq1	426	G	A	A	112.54	4	4
comp98846_c0_seq1	443	G	A	A	145.72	5	5
comp98846_c0_seq1	482	G	A	A	35.63	2	2
comp98846_c0_seq1	485	A	T	T	35.63	2	2
comp98846_c0_seq1	490	A	G	G	35.63	2	2
comp98846_c0_seq1	527	A	G	G	145.72	5	5
comp98846_c0_seq1	541	A	G	G	112.53	4	4
comp98846_c0_seq1	606	G	A	A	212.39	7	7
comp98846_c0_seq1	624	A	T	T	245.79	8	8
comp98846_c0_seq1	653	T	G	G	145.72	5	5
comp98846_c0_seq1	662	A	G	G	167.73	6	6
comp98846_c0_seq1	682	A	G	G	189.33	7	7
comp98846_c0_seq1	706	A	G	G	223.21	7	7
comp98846_c0_seq1	721	G	A	A	410.86	13	13
comp98846_c0_seq1	763	C	T	T	424.37	16	16
comp98846_c0_seq1	832	C	T	T	224.24	7	7
comp98846_c0_seq1	851	G	C	C	168.35	6	6
comp98846_c0_seq1	952	C	T	T	42.2	2	2
comp98846_c0_seq1	997	G	A	A	42.2	2	2
comp98846_c0_seq1	1024	C	G	G	42.2	2	2
comp76348_c0_seq1	574	G	T	T	14.88	1	1
comp76348_c0_seq1	575	A	C	C	14.88	1	1
comp82614_c0_seq1	237	T	G	G	58.16	2	2
comp83619_c0_seq1	66	G	C	S	92.72	32	6
comp83619_c0_seq1	100	G	A	R	141.34	40	9
comp83619_c0_seq1	104	G	T	K	175.33	41	10
comp83619_c0_seq1	573	G	T	K	19.95	34	3
comp83619_c0_seq1	1345	A	C	M	24.11	8	2
comp86224_c0_seq1	615	G	A	A	14.88	1	1
comp103801_c0_seq1	33	T	C	Y	33.12	5	2
comp103801_c0_seq1	76	T	C	Y	30.12	6	2
comp103801_c0_seq1	145	A	G	R	47.42	4	2
comp103801_c0_seq1	177	A	G	R	92.19	5	4
comp103801_c0_seq1	221	C	T	Y	50.43	3	2
comp103801_c0_seq1	238	C	G	S	92.15	4	3
comp103801_c0_seq1	319	C	A	A	14.82	1	1
comp103801_c0_seq1	320	G	C	C	14.88	1	1
comp103801_c0_seq1	321	T	G	G	14.88	1	1
comp103801_c0_seq1	324	A	T	T	14.88	1	1
comp103801_c0_seq1	599	G	T	T	14.88	1	1
comp103801_c0_seq1	600	T	C	C	14.88	1	1
comp87295_c0_seq1	1778	G	A	R	122.62	7	5
comp87295_c0_seq1	1820	T	C	Y	164.34	8	6
comp27085_c1_seq1	596	A	C	M	585.07	179	26
comp27085_c1_seq1	597	T	C	Y	163.7	189	17
comp27085_c1_seq1	626	A	T	W	200.57	181	17
comp27085_c1_seq1	628	A	C	M	665.19	172	27
comp27085_c1_seq1	797	T	C	Y	398.21	193	23
comp27085_c1_seq1	823	T	C	Y	18.31	192	14
comp27085_c1_seq1	889	T	C	Y	597.95	192	27
comp27085_c1_seq1	957	T	C	Y	316.32	198	21
comp27085_c1_seq1	1175	C	G	S	92.15	4	3
comp98946_c0_seq1	901	T	C	Y	456.06	20	15
comp98946_c0_seq1	903	T	C	Y	372.65	18	13
comp98946_c0_seq1	905	G	A	R	247.5	15	10
comp98946_c0_seq1	906	C	T	Y	247.5	15	10
comp98946_c0_seq1	1054	T	G	K	10.79	16	3
comp97707_c0_seq1	3	T	C	C	291.8	8	8
comp97707_c0_seq1	6	T	C	C	411.79	11	11
comp97707_c0_seq1	165	A	G	R	64.95	135	17
comp97707_c0_seq1	168	G	A	R	61.95	136	17
comp97707_c0_seq1	171	A	G	R	76.99	133	17
comp97707_c0_seq1	174	C	A	M	121.72	134	18
comp97707_c0_seq1	177	C	T	Y	180.57	127	20
comp97707_c0_seq1	180	T	C	Y	92.04	125	17
comp97707_c0_seq1	189	C	T	Y	593.32	141	38
comp97707_c0_seq1	207	T	C	Y	484.11	139	33
comp97707_c0_seq1	210	G	A	R	388.81	157	32
comp97707_c0_seq1	222	T	C	Y	32.52	136	20
comp97707_c0_seq1	243	A	T	W	1272.54	181	64
comp97707_c0_seq1	255	T	C	Y	1385.29	190	71
comp97707_c0_seq1	273	T	A	W	1437.04	183	72
comp97707_c0_seq1	318	G	A	R	679.67	119	32
comp97707_c0_seq1	321	T	C	Y	557.06	160	32
comp97707_c0_seq1	328	G	A	R	1119.29	150	54
comp97707_c0_seq1	333	A	G	R	150.77	139	17
comp97707_c0_seq1	334	A	C	M	576.2	129	32
comp97707_c0_seq1	336	A	C	M	274.64	116	19
comp97707_c0_seq1	351	G	C	S	1587.94	143	62
comp97707_c0_seq1	354	C	T	Y	2206.59	164	87
comp97707_c0_seq1	363	A	G	R	2008.87	174	75
comp97707_c0_seq1	393	A	G	R	1925.9	164	71
comp97707_c0_seq1	411	C	T	Y	728.9	157	40
comp97707_c0_seq1	414	A	C	M	488.17	146	29
comp97707_c0_seq1	420	C	T	Y	623.63	162	37
comp97707_c0_seq1	426	A	G	R	442.8	152	27
comp97707_c0_seq1	444	A	G	R	650.62	164	35
comp97707_c0_seq1	462	T	A	W	361.42	169	26
comp97707_c0_seq1	465	T	C	Y	346.34	173	26
comp97707_c0_seq1	477	A	G	R	166.57	164	20
comp97707_c0_seq1	492	G	T	K	185.16	174	21
comp97707_c0_seq1	891	A	C	M	659.63	196	37
comp97707_c0_seq1	897	C	T	Y	900.03	200	45
comp97707_c0_seq1	909	T	G	K	1106.63	198	51
comp97707_c0_seq1	915	G	A	R	1090.51	196	50
comp97707_c0_seq1	918	G	A	R	1134.03	185	51
comp97707_c0_seq1	921	C	T	Y	1130.43	182	50
comp97707_c0_seq1	933	T	C	Y	2143.49	194	82
comp97707_c0_seq1	942	T	C	Y	2237.79	195	85
comp97707_c0_seq1	948	T	C	Y	3172.77	198	115
comp97707_c0_seq1	954	T	A	W	3200.18	197	116
comp97707_c0_seq1	972	C	T	Y	3485.7	198	124
comp97707_c0_seq1	978	A	G	R	3129.84	187	113
comp97707_c0_seq1	984	G	A	R	3467.11	196	123
comp97707_c0_seq1	990	A	T	W	2850.55	165	101
comp97707_c0_seq1	993	A	T	W	2938.82	169	104
comp97707_c0_seq1	996	C	A	M	3106.95	178	113
comp97707_c0_seq1	1005	C	T	Y	4062.7	182	138
comp97707_c0_seq1	1008	C	G	S	4643.66	200	155
comp97707_c0_seq1	1011	C	T	Y	4908.13	200	161
comp97707_c0_seq1	1041	C	T	Y	294.06	200	29
comp97707_c0_seq1	1053	A	T	W	107.28	200	24
comp97707_c0_seq1	1056	C	A	M	40.42	199	22
comp97707_c0_seq1	1794	T	A	W	59.04	15	3
comp97707_c0_seq1	1795	G	T	K	62.05	14	3
comp98387_c4_seq1	598	A	G	G	102.23	5	5
comp13206_c0_seq1	805	G	C	S	41.4	6	2
comp63635_c0_seq1	190	A	T	T	14.88	1	1
comp73030_c0_seq1	215	A	G	G	14.88	1	1
comp89576_c0_seq1	56	T	C	C	20.1	2	2
comp89576_c0_seq1	60	A	G	G	20.1	2	2
comp89576_c0_seq1	77	A	G	G	20.1	2	2
comp89576_c0_seq1	80	T	C	C	20.1	2	2
comp75621_c1_seq1	1002	T	C	C	14.88	1	1
comp9339_c0_seq1	273	T	G	G	14.88	1	1
comp91832_c0_seq1	51	A	G	G	58.21	2	2
comp91832_c0_seq1	127	T	C	C	102.23	5	5
comp91832_c0_seq1	148	A	T	T	102.15	3	3
comp91832_c0_seq1	218	G	T	T	14.76	1	1
comp91832_c0_seq1	242	C	T	T	14.84	1	1
comp91832_c0_seq1	858	G	A	A	46.83	2	2
comp91832_c0_seq1	874	C	T	T	46.92	2	2
comp91832_c0_seq1	1047	A	C	C	58.21	2	2
comp91832_c0_seq1	1096	A	G	G	14.88	1	1
comp91832_c0_seq1	1119	A	C	C	12.49	1	1
comp91832_c0_seq1	1124	C	T	T	12.88	1	1
comp91832_c0_seq1	1169	T	C	C	14.88	1	1
comp91832_c0_seq1	1356	A	C	C	14.87	1	1
comp482395_c0_seq1	960	A	G	G	14.88	1	1
comp93938_c0_seq1	686	T	G	K	10.22	12	2
comp93938_c0_seq1	731	T	G	K	10.22	11	2
comp93938_c0_seq1	772	G	T	K	62.8	11	3
comp93938_c0_seq1	803	A	C	M	65.85	12	4
comp93938_c0_seq1	825	A	G	R	53.81	16	4
comp93938_c0_seq1	867	A	C	M	62.8	11	3
comp93938_c0_seq1	880	T	C	Y	24.11	9	2
comp93938_c0_seq1	884	A	G	R	27.11	8	2
comp83360_c0_seq1	1052	A	G	G	14.88	1	1
comp97014_c0_seq1	105	A	G	G	90.85	3	3
comp97014_c0_seq1	303	A	G	G	235.62	9	9
comp97014_c0_seq1	333	T	A	A	219.48	6	6
comp97014_c0_seq1	335	T	G	K	130.86	6	4
comp97014_c0_seq1	346	C	A	M	25.4	6	2
comp97014_c0_seq1	366	C	T	Y	120.11	8	4
comp97014_c0_seq1	416	T	C	Y	35.43	11	3
comp97014_c0_seq1	690	G	A	A	35.63	2	2
comp97014_c0_seq1	695	T	C	C	35.63	2	2
comp97014_c0_seq1	718	T	G	K	24.85	4	2
comp81145_c0_seq1	928	C	T	Y	633.82	58	23
comp94895_c0_seq1	22	A	C	M	157.9	12	6
comp94895_c0_seq1	41	A	G	R	1491.52	68	48
comp94895_c0_seq1	69	G	A	R	627.4	153	29
comp94895_c0_seq1	104	C	T	Y	1017.7	176	42
comp94895_c0_seq1	122	C	T	Y	1214.36	173	52
comp94895_c0_seq1	150	A	C	M	119.66	104	13
comp94895_c0_seq1	152	C	T	Y	16.45	105	10
comp94895_c0_seq1	170	A	T	W	1361.86	97	50
comp94895_c0_seq1	188	A	G	R	1173.29	91	44
comp94895_c0_seq1	204	G	A	R	978.37	77	37
comp94895_c0_seq1	293	A	G	R	110.76	48	7
comp94895_c0_seq1	358	T	G	K	197.01	39	11
comp94895_c0_seq1	369	T	C	Y	155.25	40	9
comp94895_c0_seq1	439	G	A	R	20.63	27	3
comp94895_c0_seq1	450	A	G	R	45.06	27	4
comp94895_c0_seq1	521	C	A	M	53.71	44	6
comp94895_c0_seq1	603	A	G	R	59.27	58	6
comp94895_c0_seq1	688	T	C	Y	148.12	59	8
comp94895_c0_seq1	690	A	G	R	649.79	74	22
comp94895_c0_seq1	768	G	A	R	669.17	200	33
comp94895_c0_seq1	784	C	T	Y	614.56	188	31
comp94895_c0_seq1	808	G	A	R	854.79	199	35
comp94895_c0_seq1	827	C	T	Y	964.32	200	39
comp94895_c0_seq1	877	C	G	S	1004.08	197	43
comp94895_c0_seq1	919	G	A	R	1230.54	190	46
comp94895_c0_seq1	941	C	T	Y	1160.06	200	43
comp94895_c0_seq1	986	C	A	M	637.79	166	27
comp94895_c0_seq1	1011	C	T	Y	3340.73	153	90
comp94895_c0_seq1	1027	C	G	S	521.86	142	24
comp94895_c0_seq1	1134	G	A	R	1207.31	87	42
comp94895_c0_seq1	1139	C	T	Y	1186.1	78	41
comp94895_c0_seq1	1170	C	T	Y	156.54	35	8
comp62883_c0_seq1	663	A	G	G	14.88	1	1
comp92872_c4_seq1	557	C	T	T	290.91	8	8
comp92872_c4_seq1	568	T	G	G	112.54	4	4
comp92872_c4_seq1	574	T	G	G	68.27	3	3
comp94654_c0_seq1	56	C	T	Y	35.39	8	2
comp94654_c0_seq1	1251	C	T	T	6424.25	174	173
comp94654_c0_seq1	1849	T	C	C	7031.1	184	183
comp94654_c0_seq1	3067	T	A	A	5443.4	143	143
comp94654_c0_seq1	3213	T	C	C	2692.62	79	79
comp61695_c0_seq1	463	G	A	R	50.43	3	2
comp514067_c0_seq1	85	T	C	C	14.88	1	1
comp514067_c0_seq1	353	A	C	C	14.85	1	1
comp73517_c0_seq1	522	A	G	G	637.95	16	16
comp100561_c1_seq1	1020	T	G	G	14.88	1	1
comp74012_c0_seq1	213	C	G	S	162.96	200	30
comp74012_c0_seq1	237	T	G	K	264.18	198	30
comp74012_c0_seq1	255	T	A	W	210.42	199	29
comp74012_c0_seq1	291	T	C	Y	201.91	196	28
comp74012_c0_seq1	1525	T	A	W	29.37	10	2
comp74012_c0_seq1	1543	T	A	A	14.88	1	1
comp69490_c0_seq1	927	G	A	A	14.88	1	1
comp97238_c3_seq1	570	T	C	Y	24.03	4	2
comp97238_c3_seq1	572	G	A	R	24.03	4	2
comp97238_c3_seq1	628	T	A	W	61.79	7	5
comp97238_c3_seq1	636	A	G	R	58.78	8	5
comp97238_c3_seq1	659	A	G	R	33.67	8	3
comp97238_c3_seq1	677	A	G	R	33.67	8	3
comp25993_c0_seq1	218	C	T	Y	44.41	5	2
comp95641_c0_seq1	265	T	C	C	68.27	3	3
comp95641_c0_seq1	273	T	A	A	35.63	2	2
comp95641_c0_seq1	376	A	C	C	35.63	2	2
comp95641_c0_seq1	392	T	A	A	35.63	2	2
comp101102_c0_seq1	365	T	C	C	14.88	1	1
comp91296_c0_seq1	47	T	A	A	101.24	4	4
comp93634_c0_seq1	2	T	C	C	14.88	1	1
comp93634_c0_seq1	204	C	A	A	123.83	4	4
comp93634_c0_seq1	275	C	T	T	46.92	2	2
comp93634_c0_seq1	359	T	A	A	101.24	4	4
comp93634_c0_seq1	372	A	G	G	145.72	5	5
comp93634_c0_seq1	438	G	A	A	145.72	5	5
comp69086_c0_seq1	246	T	G	G	14.88	1	1
comp69086_c0_seq1	417	A	T	T	14.92	2	2
comp449941_c0_seq1	205	T	C	C	12.49	1	1
comp30029_c0_seq1	93	A	T	T	58.21	2	2
comp30029_c0_seq1	141	T	A	A	58.21	2	2
comp30029_c0_seq1	290	G	A	A	58.21	2	2
comp85584_c0_seq1	361	T	A	A	14.92	2	2
comp85584_c0_seq1	379	C	T	T	14.88	1	1
comp102558_c0_seq1	376	C	G	S	34.51	15	3
comp102558_c0_seq1	377	C	G	S	82.25	14	4
comp102558_c0_seq1	379	T	A	W	43.54	12	3
comp102558_c0_seq1	516	A	G	R	55.01	6	3
comp102558_c0_seq1	875	T	G	G	176.73	5	5
comp102558_c0_seq1	893	C	A,T	W	53.49	3	2
comp102558_c0_seq1	1025	G	C	S	75.39	8	3
comp102558_c0_seq1	1027	A	T	W	115.39	8	4
comp101969_c4_seq1	1359	A	G	R	31.96	6	2
comp101969_c4_seq1	1360	C	T	Y	31.96	6	2
comp101969_c4_seq1	1546	A	G	R	254.26	17	9
comp101969_c4_seq1	1547	A	G	G	397.86	12	12
comp94975_c0_seq1	211	A	G	G	46.92	2	2
comp94975_c0_seq1	266	A	G	G	23.88	2	2
comp94975_c0_seq1	270	A	G	G	23.88	2	2
comp94975_c0_seq1	274	T	C	C	23.88	2	2
comp94975_c0_seq1	282	T	A	A	23.88	2	2
comp94975_c0_seq1	285	T	C	C	23.88	2	2
comp94975_c0_seq1	294	C	T	T	23.88	2	2
comp94975_c0_seq1	330	T	A	W	16.21	4	2
comp94975_c0_seq1	430	G	A	R	27.86	3	2
comp94975_c0_seq1	454	T	C	Y	65.21	5	4
comp94975_c0_seq1	467	A	T	W	65.21	5	4
comp94975_c0_seq1	490	C	T	Y	65.21	5	4
comp94975_c0_seq1	502	T	C	Y	65.21	5	4
comp94975_c0_seq1	523	T	C	Y	16.21	3	2
comp94975_c0_seq1	538	C	T	Y	16.21	3	2
comp94975_c0_seq1	553	A	T	W	16.21	3	2
comp102507_c0_seq1	47	T	C	C	58.21	2	2
comp102507_c0_seq1	1023	A	C	M	897.46	56	29
comp102507_c0_seq1	1122	A	G	R	133.87	61	9
comp102507_c0_seq1	1125	C	T	Y	133.87	60	9
comp102507_c0_seq1	1128	A	G	R	616.06	55	23
comp102507_c0_seq1	1130	C	T	Y	130.9	61	9
comp102507_c0_seq1	1154	C	A	M	158.34	62	11
comp102507_c0_seq1	1181	T	A	W	71.11	15	5
comp102507_c0_seq1	1183	T	A	W	43.69	13	4
comp102507_c0_seq1	1293	A	C	M	1366.38	57	46
comp102507_c0_seq1	1299	C	T	Y	1468.07	64	49
comp102507_c0_seq1	1321	G	A	R	1636.27	69	52
comp102507_c0_seq1	1367	T	G	K	399.47	73	17
comp102507_c0_seq1	1440	C	G	S	292.61	67	14
comp102507_c0_seq1	1450	A	C	M	321.32	64	15
comp102507_c0_seq1	1527	C	T	Y	80.45	51	7
comp102507_c0_seq1	1630	G	A	R	81.27	60	8
comp102507_c0_seq1	1672	A	T	W	119.91	64	9
comp102507_c0_seq1	1779	A	G	R	300.55	63	15
comp102507_c0_seq1	1795	A	T	W	545.91	60	18
comp102507_c0_seq1	1819	G	A	R	199.05	55	12
comp102507_c0_seq1	1827	T	A	W	211.09	52	12
comp102507_c0_seq1	1847	A	G	R	141.63	36	9
comp102507_c0_seq1	1849	C	T	Y	180.34	39	10
comp102507_c0_seq1	1862	C	T	Y	213.48	48	11
comp102507_c0_seq1	1925	G	A	R	306.82	68	16
comp102507_c0_seq1	1939	A	T	W	331.22	73	17
comp102507_c0_seq1	1971	G	A	R	245.45	69	17
comp102507_c0_seq1	1975	A	G	R	260.5	63	17
comp102507_c0_seq1	2033	G	A	R	280.43	56	13
comp102507_c0_seq1	2034	G	A	R	280.43	56	13
comp102507_c0_seq1	2054	G	A	R	284.18	49	13
comp102507_c0_seq1	2071	T	G	K	452.99	32	15
comp102507_c0_seq1	2109	C	T	Y	197	24	10
comp102507_c0_seq1	2122	C	A	M	23.39	15	2
comp102507_c0_seq1	2124	G	C	S	274.82	13	11
comp102507_c0_seq1	2303	A	T	W	335.21	31	14
comp102507_c0_seq1	2318	G	A	R	231.36	32	12
comp102507_c0_seq1	2322	T	C	Y	231.45	32	12
comp102507_c0_seq1	2359	T	C	Y	249.4	43	12
comp102507_c0_seq1	2367	G	A	R	255.51	42	12
comp102507_c0_seq1	2393	G	T	K	257.94	55	13
comp102507_c0_seq1	2415	G	A	R	321.09	65	16
comp102507_c0_seq1	2434	C	T	Y	336.47	71	17
comp102507_c0_seq1	2446	G	A	R	453.04	74	20
comp102507_c0_seq1	2520	G	T	K	567.18	88	26
comp102507_c0_seq1	2601	T	C	Y	553.66	58	17
comp102507_c0_seq1	2652	C	T	Y	347.08	65	18
comp102507_c0_seq1	2673	G	T	K	312.46	60	17
comp102507_c0_seq1	2692	A	G	R	304.27	56	16
comp102507_c0_seq1	2715	G	A	R	65.85	42	8
comp102507_c0_seq1	3052	G	A	R	545.25	28	15
comp102507_c0_seq1	3113	C	T	Y	503.76	33	17
comp102507_c0_seq1	3347	C	T	Y	285.25	31	9
comp102507_c0_seq1	3575	A	G	R	556.64	29	15
comp102507_c0_seq1	3632	A	G	R	760.06	36	24
comp83906_c0_seq1	799	T	C	C	14.88	1	1
comp83906_c0_seq1	1082	A	T	W	27.86	3	2
comp83906_c0_seq1	1096	A	T	W	69.57	4	3
comp101656_c1_seq1	139	G	A	A	14.88	1	1
comp639070_c0_seq1	52	G	C	C	81.41	3	3
comp639070_c0_seq1	348	A	C	M	47.42	5	2
comp639070_c0_seq1	370	A	G	G	53.53	3	3
comp93251_c2_seq1	337	T	A	A	58.21	2	2
comp14073_c1_seq1	233	T	C	C	14.88	1	1
comp87487_c0_seq1	255	A	G	R	13.75	16	2
comp56666_c0_seq1	28	G	A	R	35.38	9	2
comp56666_c0_seq1	417	T	C	Y	11.61	18	2
comp41346_c0_seq1	268	T	G	G	58.21	2	2
comp88853_c0_seq1	6	C	A	A	14.88	1	1
comp88853_c0_seq1	7	A	T	T	14.88	1	1
comp92196_c0_seq1	437	C	T	T	58.21	2	2
comp92196_c0_seq1	590	T	C	C	58.21	2	2
comp102331_c3_seq1	983	T	A	A	14.88	1	1
comp69866_c0_seq1	652	A	T	T	14.88	1	1
comp23732_c0_seq1	283	T	A	A	14.88	1	1
comp91192_c0_seq1	1442	A	T	T	14.88	1	1
comp77273_c2_seq1	312	G	T	K	44.41	5	2
comp77273_c2_seq1	636	A	G	R	50.43	3	2
comp102049_c0_seq1	601	G	T	T	10.43	1	1
comp102049_c0_seq1	602	G	A	A	10.43	1	1
comp102049_c0_seq1	603	T	G	G	10.43	1	1
comp84767_c0_seq1	332	T	A	W	38.44	8	3
comp84767_c0_seq1	346	T	C	Y	41.45	7	3
comp84767_c0_seq1	366	G	T	K	41.45	8	3
comp84767_c0_seq1	515	A	G	G	74.84	3	3
comp84767_c0_seq1	527	G	T	T	107.82	4	4
comp84767_c0_seq1	540	T	A	A	35.63	2	2
comp84767_c0_seq1	541	T	G	G	35.63	2	2
comp84767_c0_seq1	559	T	C	C	35.63	2	2
comp84767_c0_seq1	561	A	G	G	35.63	2	2
comp84767_c0_seq1	563	A	T	T	35.63	2	2
comp84767_c0_seq1	576	C	A	A	35.63	2	2
comp84767_c0_seq1	592	A	C	C	35.63	2	2
comp103582_c1_seq1	533	C	T	Y	1602.28	110	54
comp103582_c1_seq1	542	A	C	M	1853.23	122	62
comp103582_c1_seq1	563	C	T	Y	2228.05	136	78
comp103582_c1_seq1	674	G	A	R	73.98	22	5
comp103582_c1_seq1	808	A	T	W	23.6	36	4
comp103582_c1_seq1	823	A	G	R	34.19	97	11
comp97897_c1_seq1	560	T	A	A	74.84	3	3
comp97897_c1_seq1	563	T	C	Y	36.52	6	2
comp97897_c1_seq1	589	C	T	T	1162.28	35	34
comp97897_c1_seq1	625	A	T	W	14.29	55	6
comp97897_c1_seq1	630	T	C	Y	14.29	55	6
comp97897_c1_seq1	638	C	T	Y	1585.17	56	49
comp97897_c1_seq1	639	G	A	R	44.55	56	7
comp97897_c1_seq1	654	T	C	Y	39.31	48	6
comp97897_c1_seq1	655	A	G	R	48.34	45	6
comp97897_c1_seq1	672	T	C	Y	121.45	34	7
comp97897_c1_seq1	684	C	A	M	209.14	20	8
comp97897_c1_seq1	686	A	T	W	12.38	19	3
comp97897_c1_seq1	746	G	A	A	586.64	19	19
comp97897_c1_seq1	771	C	T	T	412.9	14	14
comp97897_c1_seq1	779	C	T	T	210.96	8	8
comp97897_c1_seq1	783	G	T	T	177.56	7	7
comp97897_c1_seq1	796	A	G	G	277.8	10	10
comp97897_c1_seq1	821	T	A	A	232.6	9	9
comp97897_c1_seq1	843	G	A	A	165.79	7	7
comp97897_c1_seq1	855	A	G	G	77.71	4	4
comp97897_c1_seq1	863	G	T	T	44.74	3	3
comp97897_c1_seq1	877	T	C	C	23.88	2	2
comp97897_c1_seq1	895	G	A	A	101.24	4	4
comp97897_c1_seq1	897	C	T	T	101.24	4	4
comp97897_c1_seq1	900	G	A	A	101.24	4	4
comp97897_c1_seq1	902	A	G	G	101.24	4	4
comp97897_c1_seq1	918	A	G	G	101.24	4	4
comp97897_c1_seq1	924	T	C	C	101.24	4	4
comp97897_c1_seq1	930	G	T	T	89.48	4	4
comp97897_c1_seq1	931	T	C	C	89.48	4	4
comp97897_c1_seq1	935	C	T	T	155.96	6	6
comp97897_c1_seq1	1009	G	C	C	390.8	14	14
comp97897_c1_seq1	1019	A	T	T	369.14	13	13
comp97897_c1_seq1	1037	T	C	C	168.63	6	6
comp97897_c1_seq1	1059	G	A	A	12.36	2	2
comp507294_c0_seq1	302	A	T	T	14.88	1	1
comp85249_c0_seq1	290	A	G	G	7999.54	197	197
comp85249_c0_seq1	393	C	T	T	7854.39	194	194
comp85249_c0_seq1	395	C	A	A	7905.09	195	195
comp85249_c0_seq1	542	C	T	T	8179.35	199	199
comp74979_c0_seq1	267	A	G	G	97.43	3	3
comp74979_c0_seq1	314	A	G	G	97.43	3	3
comp74979_c0_seq1	330	T	G	G	14.88	1	1
comp92208_c0_seq1	41	C	A	M	32.37	9	2
comp92208_c0_seq1	333	T	G	K	44.01	21	3
comp74266_c0_seq1	1115	A	T	T	10.43	1	1
comp74266_c0_seq1	1116	A	G	G	10.43	1	1
comp88153_c0_seq1	109	A	T	W	68.37	18	4
comp88153_c0_seq1	119	C	A	A	2444.25	73	73
comp88153_c0_seq1	160	C	T	T	4539.62	119	119
comp88153_c0_seq1	275	G	A	A	6697.43	172	172
comp88153_c0_seq1	974	C	T	T	8470.1	200	200
comp88153_c0_seq1	1445	C	G	G	7662.44	193	192
comp88153_c0_seq1	1475	T	C	C	7833.82	195	195
comp88153_c0_seq1	1515	T	C	C	7996.26	197	197
comp1255_c1_seq1	238	T	G	K	35.38	9	2
comp87631_c0_seq1	513	A	G	G	14.88	1	1
comp14763_c0_seq1	274	A	G	G	14.88	1	1
comp59964_c0_seq1	158	A	G	G	14.88	1	1
comp99053_c0_seq1	276	A	G	R	47.46	5	3
comp45804_c0_seq1	548	T	A	A	14.88	1	1
comp45804_c0_seq1	750	A	T	T	12.88	1	1
comp45804_c0_seq1	898	A	C	C	12.49	1	1
comp102818_c1_seq1	134	A	C	C	14.88	1	1
comp695281_c0_seq1	52	G	A	A	14.88	1	1
comp89379_c0_seq1	213	T	G	G	861.67	25	25
comp89379_c0_seq1	332	T	C	C	980.93	30	30
comp89379_c0_seq1	335	A	G	G	935.74	27	27
comp89379_c0_seq1	389	A	C	C	1159.62	29	29
comp89379_c0_seq1	436	T	C	C	1129.11	29	29
comp89379_c0_seq1	822	C	A	A	320.13	8	8
comp81653_c2_seq1	270	A	C	C	14.88	1	1
comp94488_c0_seq1	1562	T	G	K	48.49	12	3
comp94192_c0_seq1	80	G	A	A	30.44	2	2
comp94192_c0_seq1	86	C	T	T	30.44	2	2
comp94192_c0_seq1	131	A	C	C	30.44	2	2
comp94192_c0_seq1	215	G	A	A	211.92	7	7
comp94192_c0_seq1	250	G	A	A	256.61	8	8
comp94192_c0_seq1	286	T	C	C	324.34	9	9
comp94192_c0_seq1	348	G	A	A	146.5	6	6
comp94192_c0_seq1	359	T	G	G	224.29	8	8
comp94192_c0_seq1	416	G	C	C	245.8	7	7
comp94192_c0_seq1	552	G	A	A	57.62	2	2
comp94192_c0_seq1	566	A	G	G	14.88	1	1
comp74897_c1_seq1	42	T	C	C	14.88	1	1
comp74897_c1_seq1	105	C	A	A	11.55	1	1
comp63056_c1_seq1	85	A	G	R	41.4	6	2
comp32308_c0_seq1	831	T	C	C	12.49	1	1
comp84765_c0_seq1	108	A	G	R	99.28	10	5
comp84765_c0_seq1	175	G	T	K	1354.46	124	49
comp84765_c0_seq1	201	A	G	R	1548.03	159	62
comp84765_c0_seq1	228	A	G	R	1478.1	136	53
comp84765_c0_seq1	374	G	T	K	571.03	90	19
comp84765_c0_seq1	411	A	G	R	1386.36	49	42
comp84765_c0_seq1	446	T	C	Y	636.16	29	22
comp84765_c0_seq1	455	T	C	Y	557.45	27	20
comp84765_c0_seq1	456	T	A	W	557.45	27	20
comp84765_c0_seq1	461	G	A	R	587.87	28	21
comp84765_c0_seq1	478	G	A	R	466.17	24	17
comp103568_c0_seq1	25	A	G	G	597.39	17	17
comp103568_c0_seq1	44	T	C	Y	16.39	24	4
comp103568_c0_seq1	45	A	C	M	16.39	24	4
comp103568_c0_seq1	46	A	C	M	786.73	47	26
comp103568_c0_seq1	202	T	G	K	267.2	19	9
comp103568_c0_seq1	435	A	T	W	34.96	28	3
comp103568_c0_seq1	712	T	C	Y	29.83	22	3
comp103568_c0_seq1	713	G	C	S	29.83	22	3
comp103568_c0_seq1	1229	G	A	A	14.88	1	1
comp77319_c0_seq1	272	T	C	C	14.88	1	1
comp77319_c0_seq1	472	T	G	G	58.21	2	2
comp92700_c1_seq1	38	C	T	T	14.88	1	1
comp92700_c1_seq1	41	C	T	T	14.88	1	1
comp92700_c1_seq1	85	G	A	A	14.88	1	1
comp156628_c0_seq1	295	T	G	G	12.05	1	1
comp102213_c2_seq1	38	T	C	Y	31.41	4	2
comp102213_c2_seq1	63	A	G	R	31.41	5	2
comp102213_c2_seq1	228	T	C	Y	69.74	6	3
comp102213_c2_seq1	252	T	C	Y	24.44	5	3
comp102213_c2_seq1	258	G	C	S	24.44	5	3
comp102213_c2_seq1	262	C	G	S	24.44	5	3
comp102213_c2_seq1	278	A	G	R	64.39	5	4
comp102213_c2_seq1	331	G	A	R	103.47	7	5
comp102213_c2_seq1	343	G	C	S	103.47	7	5
comp102213_c2_seq1	362	C	T	Y	175.64	10	8
comp102213_c2_seq1	363	C	G	S	175.65	10	8
comp102213_c2_seq1	438	C	T	T	179.69	7	7
comp102213_c2_seq1	442	T	A	A	135.17	5	5
comp102213_c2_seq1	668	A	T	W	44.41	5	2
comp102213_c2_seq1	696	C	G	G	102.19	4	4
comp82309_c1_seq1	314	C	T	T	14.88	1	1
comp82309_c1_seq1	556	C	A	A	14.88	1	1
comp88243_c0_seq1	1929	T	C	Y	255.41	195	26
comp88243_c0_seq1	1934	C	T	Y	314.1	196	28
comp88243_c0_seq1	1960	A	T	W	309.15	194	29
comp88243_c0_seq1	2002	G	A	R	381.94	196	29
comp88243_c0_seq1	2028	C	A	M	583.28	198	34
comp88243_c0_seq1	2038	C	T	Y	604.96	184	33
comp88243_c0_seq1	2049	C	T	Y	702.29	182	34
comp88243_c0_seq1	2245	A	T	W	947.76	149	34
comp88243_c0_seq1	2272	G	T	K	671.03	113	26
comp88243_c0_seq1	2313	T	A	W	285.1	24	10
comp312966_c0_seq1	939	C	A	A	14.16	1	1
comp312966_c0_seq1	944	C	A	A	14.84	1	1
comp69303_c0_seq1	417	A	G	G	146.42	4	4
comp69303_c0_seq1	513	T	C	C	58.21	2	2
comp71488_c0_seq1	1007	G	A	A	14.88	1	1
comp1014601_c0_seq1	304	A	G	G	14.92	2	2
comp94432_c0_seq1	163	A	C	C	14.88	1	1
comp45706_c0_seq1	353	A	G	R	143.38	101	10
comp45706_c0_seq1	356	G	A	R	56.94	100	8
comp45706_c0_seq1	2135	T	G	K	38.39	8	2
comp61765_c1_seq1	485	G	C	C	7858.17	194	193
comp90890_c0_seq1	183	C	T	T	14.88	1	1
comp90890_c0_seq1	198	A	C	C	14.92	2	2
comp90890_c0_seq1	253	T	C	C	14.88	1	1
comp90890_c0_seq1	628	C	T	T	14.88	1	1
comp97388_c0_seq1	48	G	A	R	158.41	7	5
comp97388_c0_seq1	56	A	G	R	121.41	6	4
comp97388_c0_seq1	118	G	C	S	41.4	7	2
comp97388_c0_seq1	158	C	A	M	47.42	5	2
comp97388_c0_seq1	160	C	T	Y	44.41	6	2
comp97388_c0_seq1	161	A	G	R	44.41	6	2
comp97388_c0_seq1	195	C	T	Y	44.41	6	2
comp97388_c0_seq1	309	G	C	S	41.4	6	2
comp97388_c0_seq1	377	A	G	R	77.17	10	4
comp97388_c0_seq1	396	A	G	R	98.81	11	5
comp97388_c0_seq1	421	A	C	M	18.71	15	2
comp97388_c0_seq1	422	G	C	S	289.74	16	11
comp97388_c0_seq1	427	G	A	R	111.21	18	6
comp97388_c0_seq1	512	C	T	Y	13.58	10	2
comp97388_c0_seq1	522	A	G	R	38.06	9	3
comp35348_c0_seq1	130	A	T	T	14.88	1	1
comp95401_c0_seq1	102	T	C	C	979.97	29	29
comp95401_c0_seq1	137	A	G	G	1382.23	36	36
comp95401_c0_seq1	541	T	C	C	1308.9	32	32
comp95401_c0_seq1	551	C	T	T	1398.36	34	34
comp95401_c0_seq1	641	T	C	C	1688.78	44	44
comp95401_c0_seq1	655	T	C	C	1688.91	43	43
comp95401_c0_seq1	676	T	C	C	1867.38	53	53
comp95401_c0_seq1	1447	T	C	C	2583.58	62	62
comp95401_c0_seq1	1857	A	G	G	2541.39	69	69
comp95401_c0_seq1	1864	T	C	C	2592.85	69	69
comp95401_c0_seq1	1889	G	T	T	2605.76	67	67
comp72521_c0_seq1	1229	A	C	M	641.06	82	26
comp72521_c0_seq1	1245	T	A	W	83.17	111	10
comp72521_c0_seq1	1246	C	G	S	114.15	112	11
comp97869_c0_seq1	81	G	T	K	32.37	10	2
comp97869_c0_seq1	82	G	T	K	74.09	11	3
comp97869_c0_seq1	165	T	C	Y	155.43	197	17
comp56521_c1_seq1	308	A	G	R	19.95	30	3
comp96150_c0_seq1	281	A	G	R	50.44	3	2
comp96150_c0_seq1	438	T	C	Y	32.37	10	2
comp96150_c0_seq1	454	G	T	K	35.38	9	2
comp96150_c0_seq1	572	A	G	R	38.43	9	3
comp96150_c0_seq1	608	A	C	M	121.91	12	6
comp96150_c0_seq1	792	A	T	W	30.11	6	2
comp96150_c0_seq1	926	C	T	Y	60.08	7	3
comp96150_c0_seq1	940	A	G	R	63.09	6	3
comp96150_c0_seq1	957	A	G	R	107.82	6	4
comp96150_c0_seq1	961	G	C	S	27.4	3	2
comp96150_c0_seq1	982	G	A	R	135.24	9	5
comp96150_c0_seq1	1030	A	G	R	113.59	10	5
comp96150_c0_seq1	1047	T	C	Y	113.55	9	4
comp96150_c0_seq1	1061	A	G	R	119.57	6	4
comp96150_c0_seq1	1135	C	T	Y	35.42	10	3
comp96409_c0_seq1	807	T	G	K	43.69	30	5
comp96409_c0_seq1	1017	T	C	Y	64.65	11	3
comp96409_c0_seq1	2283	A	G	R	62.39	7	3
comp96409_c0_seq1	2335	T	C	Y	71.87	8	4
comp96409_c0_seq1	2344	A	T	W	62.84	11	4
comp96409_c0_seq1	2345	T	A	W	62.84	11	4
comp96409_c0_seq1	2374	T	A	W	280.46	13	9
comp96409_c0_seq1	2413	T	C	Y	123.65	14	5
comp96409_c0_seq1	2425	A	T	W	142.33	15	6
comp96409_c0_seq1	2448	A	T	W	100.61	12	5
comp96409_c0_seq1	2459	C	A	M	172.75	15	7
comp96409_c0_seq1	2471	G	A	R	169.74	16	7
comp96409_c0_seq1	2497	A	G	R	274.47	15	9
comp96409_c0_seq1	2540	C	T	Y	25.47	11	3
comp96409_c0_seq1	2544	G	A	R	28.48	10	3
comp96409_c0_seq1	2548	A	G	R	28.48	10	3
comp96409_c0_seq1	2577	C	T	Y	187.03	13	7
comp96409_c0_seq1	2589	A	T	W	201.36	12	7
comp96409_c0_seq1	2640	A	G	R	136.81	17	7
comp96409_c0_seq1	2674	A	G	R	106.34	15	5
comp96409_c0_seq1	2685	C	T	Y	98.06	14	5
comp96409_c0_seq1	2697	A	G	R	104.07	11	5
comp96392_c0_seq1	119	A	G	R	2557.28	168	90
comp96392_c0_seq1	225	T	C	Y	2269.48	185	78
comp96392_c0_seq1	319	G	C	S	1452.65	122	50
comp96392_c0_seq1	348	T	C	Y	1663.29	87	53
comp96392_c0_seq1	355	T	G	K	55.56	8	3
comp96392_c0_seq1	356	T	C	Y	55.56	8	3
comp96392_c0_seq1	416	T	C	Y	33.12	6	2
comp96392_c0_seq1	450	G	C	S	33.12	5	2
comp96392_c0_seq1	452	G	A	R	36.13	4	2
comp96392_c0_seq1	672	C	G	S	33.12	5	2
comp93619_c0_seq1	353	A	T	W	34.42	3	2
comp93619_c0_seq1	357	T	G	K	76.14	4	3
comp58289_c0_seq1	53	A	G	R	41.41	6	2
comp86963_c0_seq1	72	C	T	T	14.88	1	1
comp86963_c0_seq1	480	A	G	G	2192.25	56	56
comp86963_c0_seq1	697	A	G	G	1622.13	42	42
comp86963_c0_seq1	790	A	T	T	1219.67	35	35
comp86963_c0_seq1	807	G	A	A	1174.6	30	30
comp66533_c0_seq1	325	A	G	G	58.21	2	2
comp103059_c0_seq1	115	A	G	R	35.38	10	2
comp103059_c0_seq1	187	A	G	R	65.81	9	3
comp103059_c0_seq1	214	T	C	Y	83.16	8	4
comp103059_c0_seq1	280	G	A	R	36.13	4	2
comp103059_c0_seq1	323	T	C	Y	108.27	6	4
comp103059_c0_seq1	728	A	G	R	68.07	14	3
comp103059_c0_seq1	734	A	C	M	157.57	15	6
comp103059_c0_seq1	804	C	T	Y	32.37	9	2
comp103059_c0_seq1	859	T	G	K	127.85	7	4
comp103059_c0_seq1	1033	G	T	K	44.41	7	2
comp103059_c0_seq1	1088	C	A	M	99.24	9	4
comp103059_c0_seq1	1205	G	A	R	80.11	8	3
comp103059_c0_seq1	1305	T	A	W	166.6	10	6
comp103059_c0_seq1	1326	T	C	Y	35.38	8	2
comp103059_c0_seq1	1388	C	T	Y	35.38	10	2
comp103059_c0_seq1	1466	G	T	K	80.11	9	3
comp103059_c0_seq1	1476	G	A	R	35.38	9	2
comp103059_c0_seq1	1523	A	G	R	77.14	11	4
comp103059_c0_seq1	1532	C	A	M	80.11	8	3
comp103059_c0_seq1	1622	A	G	R	71.08	11	3
comp103059_c0_seq1	1656	A	G	R	35.38	11	2
comp103059_c0_seq1	1659	A	G	R	35.38	11	2
comp103059_c0_seq1	1719	A	T	W	41.4	6	2
comp103059_c0_seq1	1787	A	G	R	47.42	4	2
comp103059_c0_seq1	1795	C	T	T	58.21	2	2
comp103059_c0_seq1	1797	A	G	G	58.21	2	2
comp98223_c0_seq1	38	T	A	W	1358.87	141	54
comp98223_c0_seq1	57	C	A	M	1961.72	198	80
comp98223_c0_seq1	64	A	T	W	1961.76	199	81
comp98223_c0_seq1	108	A	G	R	1273.69	150	52
comp98223_c0_seq1	178	T	G	K	715.62	185	39
comp98223_c0_seq1	179	A	G	R	715.62	186	39
comp98223_c0_seq1	189	C	A	M	779.48	188	41
comp98223_c0_seq1	197	C	G	S	712.61	188	39
comp98223_c0_seq1	209	G	A	R	642.11	192	36
comp98223_c0_seq1	228	G	T	K	325.2	169	25
comp98223_c0_seq1	236	C	T	Y	277.05	187	25
comp98223_c0_seq1	246	G	A	R	282.15	189	24
comp98223_c0_seq1	249	C	G	S	523.69	188	32
comp98223_c0_seq1	282	G	A	R	1104.04	199	49
comp98223_c0_seq1	301	T	A	W	1403.48	177	57
comp98223_c0_seq1	316	C	T	Y	1552.14	163	62
comp98223_c0_seq1	367	T	A	W	66.12	50	6
comp98223_c0_seq1	369	C	A	M	50.08	42	5
comp98223_c0_seq1	382	A	G	R	82.93	33	7
comp98223_c0_seq1	384	A	T	W	16.17	33	5
comp98223_c0_seq1	430	G	T	K	35.95	10	3
comp98223_c0_seq1	463	A	G	R	46.35	10	4
comp98223_c0_seq1	467	A	G	R	46.35	10	4
comp98223_c0_seq1	468	G	A	R	46.35	10	4
comp98223_c0_seq1	480	A	G	R	194.08	12	7
comp98223_c0_seq1	487	T	C	Y	16.99	14	2
comp98223_c0_seq1	521	A	G	R	41.13	13	4
comp98223_c0_seq1	663	G	A	A	235.54	7	7
comp98223_c0_seq1	882	A	G	G	190.9	5	5
comp98223_c0_seq1	888	T	A	A	190.9	5	5
comp98223_c0_seq1	914	C	T	T	190.9	5	5
comp98223_c0_seq1	1397	G	T	T	79.56	3	3
comp98223_c0_seq1	1423	C	T	T	101.24	4	4
comp98223_c0_seq1	1429	G	A	A	101.24	4	4
comp98223_c0_seq1	1435	C	G	G	68.27	3	3
comp98223_c0_seq1	1470	G	A	A	68.27	3	3
comp91803_c0_seq1	1059	T	C	Y	16.57	56	4
comp91803_c0_seq1	1213	T	C	Y	35.38	8	2
comp91803_c0_seq1	1216	T	A	W	80.11	8	3
comp118015_c0_seq1	702	T	C	Y	14.04	16	2
comp88750_c0_seq1	348	A	C	M	37.83	5	2
comp89210_c4_seq1	37	T	C	C	48.77	2	2
comp89210_c4_seq1	174	C	A	A	14.88	1	1
comp96891_c0_seq1	139	G	T	K	67.98	20	4
comp96891_c0_seq1	165	T	C	Y	71.64	32	5
comp96891_c0_seq1	195	G	A	R	25.88	39	4
comp96891_c0_seq1	224	T	C	Y	42.15	44	6
comp96891_c0_seq1	225	G	A	R	42.15	44	6
comp96891_c0_seq1	273	T	C	Y	84.64	39	7
comp96891_c0_seq1	290	C	T	Y	54.25	41	6
comp96891_c0_seq1	533	T	C	Y	33.12	5	2
comp96891_c0_seq1	534	A	T	W	33.12	5	2
comp92585_c2_seq1	334	T	C	Y	46.95	14	3
comp92585_c2_seq1	409	C	T	Y	11.65	17	3
comp92585_c2_seq1	480	C	T	Y	41.77	24	4
comp92585_c2_seq1	863	C	A	M	183.06	24	8
comp92585_c2_seq1	910	C	T	Y	46.56	19	4
comp92585_c2_seq1	928	A	G	R	22.18	18	3
comp92585_c2_seq1	945	A	C	M	19.2	19	3
comp92585_c2_seq1	954	C	T	Y	13.34	21	3
comp92585_c2_seq1	956	A	G	R	19.2	19	3
comp92585_c2_seq1	973	C	A	M	22.18	17	3
comp80381_c0_seq1	469	A	T	T	14.88	1	1
comp80381_c0_seq1	488	A	G	G	14.92	2	2
comp80381_c0_seq1	496	C	G	G	14.92	2	2
comp104349_c0_seq1	1624	A	G	G	14.88	1	1
comp97893_c2_seq1	1276	A	G	R	49.24	8	3
comp97893_c2_seq1	1283	T	G	K	49.24	8	3
comp97893_c2_seq1	1291	G	A	R	49.24	8	3
comp97893_c2_seq1	1294	T	G	K	49.24	8	3
comp97893_c2_seq1	1299	C	A	M	49.24	8	3
comp97893_c2_seq1	1305	A	C	M	15.92	8	2
comp97893_c2_seq1	1307	A	G	R	15.92	8	2
comp97893_c2_seq1	1313	C	T	Y	18.88	6	2
comp97893_c2_seq1	1330	C	T	Y	255.68	11	9
comp97893_c2_seq1	1343	A	T	W	259.59	10	9
comp97893_c2_seq1	1801	A	C	C	14.88	1	1
comp97893_c2_seq1	1803	T	G	G	14.88	1	1
comp94681_c0_seq1	31	A	G	G	14.88	1	1
comp94681_c0_seq1	538	G	A	A	90.85	3	3
comp94681_c0_seq1	1124	T	G	G	102.15	3	3
comp94681_c0_seq1	1379	G	A	A	102.15	3	3
comp414306_c0_seq1	168	T	G	G	14.85	1	1
comp96904_c1_seq1	368	G	C	C	14.88	1	1
comp96904_c1_seq1	426	A	C	C	11.01	1	1
comp95702_c0_seq1	217	T	C	C	14.88	1	1
comp95702_c0_seq1	1629	C	G	G	324.85	8	8
comp95702_c0_seq1	1790	G	A	A	190.88	6	6
comp95702_c0_seq1	1853	T	C	C	146.55	7	7
comp85634_c0_seq1	61	A	G	G	14.88	1	1
comp85634_c0_seq1	501	C	T	T	14.6	1	1
comp85634_c0_seq1	539	G	A	A	14.85	1	1
comp102008_c1_seq1	168	T	C	Y	723	48	23
comp102008_c1_seq1	402	C	T	Y	999.27	66	36
comp102008_c1_seq1	585	G	A	R	817.76	41	23
comp102008_c1_seq1	711	C	T	Y	745.36	55	24
comp83542_c1_seq1	969	T	C	Y	35.38	10	2
comp77215_c0_seq1	273	A	T	T	14.88	1	1
comp97437_c1_seq1	70	C	G	G	12.49	1	1
comp101817_c0_seq1	360	G	T	K	58.83	6	3
comp101817_c0_seq1	361	T	C	Y	58.83	6	3
comp101817_c0_seq1	366	C	A	M	58.83	6	3
comp101817_c0_seq1	377	T	G	K	21.86	5	2
comp101817_c0_seq1	428	T	C	C	35.63	2	2
comp101817_c0_seq1	569	A	C	C	23.88	2	2
comp101817_c0_seq1	593	A	C	C	23.88	2	2
comp101817_c0_seq1	596	T	C	C	23.88	2	2
comp101817_c0_seq1	636	T	G	G	56.5	3	3
comp101817_c0_seq1	663	T	A	A	35.63	2	2
comp101817_c0_seq1	685	G	A	A	79.56	3	3
comp101817_c0_seq1	694	T	C	C	14.88	1	1
comp101817_c0_seq1	844	A	G	G	42.2	2	2
comp101817_c0_seq1	964	T	C	C	179.07	7	7
comp101817_c0_seq1	1007	G	A	A	145.77	6	6
comp101817_c0_seq1	1050	T	G	G	155.96	6	6
comp101817_c0_seq1	1143	C	T	T	56.5	3	3
comp101817_c0_seq1	1144	T	C	C	56.5	3	3
comp101817_c0_seq1	1148	C	T	T	56.5	3	3
comp101817_c0_seq1	1152	A	G	G	56.5	3	3
comp101817_c0_seq1	2129	A	T	T	190.94	6	6
comp101817_c0_seq1	2214	A	G	G	102.15	3	3
comp104631_c0_seq1	66	A	C	M	145.3	7	5
comp104631_c0_seq1	285	C	T	Y	186.79	14	6
comp104631_c0_seq1	289	G	A	R	226.84	15	8
comp104631_c0_seq1	314	T	G	K	107.63	14	5
comp104631_c0_seq1	1029	C	T	Y	13.02	8	2
comp104631_c0_seq1	1050	C	T	Y	13.02	8	2
comp104631_c0_seq1	1054	A	C	M	13.02	8	2
comp104631_c0_seq1	1069	A	G	R	80.22	10	4
comp104631_c0_seq1	1238	C	T	Y	299.93	130	17
comp104631_c0_seq1	1460	G	A	R	32.2	195	15
comp104631_c0_seq1	2092	A	G	R	17.4	15	2
comp97017_c0_seq1	262	C	T	Y	315.4	23	10
comp97017_c0_seq1	294	T	C	Y	395.75	25	13
comp97017_c0_seq1	334	A	G	R	377.72	32	12
comp97017_c0_seq1	381	C	A	M	230.08	30	10
comp97017_c0_seq1	510	T	C	Y	414.3	32	15
comp97017_c0_seq1	612	A	T	W	534.19	31	18
comp97017_c0_seq1	613	T	G	K	575.16	32	19
comp96238_c0_seq1	266	A	G	G	14.88	1	1
comp94644_c0_seq1	527	T	G	G	101.24	4	4
comp94644_c0_seq1	682	A	G	G	157.02	5	5
comp81233_c1_seq1	519	T	A	W	32.37	13	2
comp97013_c0_seq1	932	T	G	K	61.33	35	5
comp94640_c3_seq1	192	G	A	A	125.68	4	4
comp94640_c3_seq1	193	T	C	C	125.68	4	4
comp94640_c3_seq1	334	A	G	G	14.88	1	1
comp94640_c3_seq1	359	A	T	T	14.92	2	2
comp94640_c3_seq1	380	A	G	G	14.92	2	2
comp55603_c0_seq1	1059	A	G	R	46.63	5	2
comp55603_c0_seq1	1113	T	G	G	14.88	1	1
comp63571_c0_seq1	195	A	G	G	14.88	1	1
comp63571_c0_seq1	575	A	C	C	12.49	1	1
comp83057_c1_seq1	30	A	T	T	58.21	2	2
comp83057_c1_seq1	946	C	T	Y	19.91	43	5
comp83057_c1_seq1	947	C	T	Y	70.61	41	6
comp83057_c1_seq1	952	C	T	Y	2362.69	114	80
comp89644_c0_seq1	335	G	A	A	102.19	4	4
comp89644_c0_seq1	464	C	T	T	190.43	5	5
comp89644_c0_seq1	503	A	G	G	146.46	5	5
comp89644_c0_seq1	587	C	A	A	58.21	2	2
comp89644_c0_seq1	641	A	G	R	44.35	5	2
comp89644_c0_seq1	881	G	A	A	58.21	2	2
comp101930_c2_seq1	140	T	A	A	14.88	1	1
comp101930_c2_seq1	206	G	A	A	14.88	1	1
comp101930_c2_seq1	211	G	A	A	14.88	1	1
comp101930_c2_seq1	423	T	C	C	14.88	1	1
comp101930_c2_seq1	565	A	C	C	14.88	1	1
comp101930_c2_seq1	1423	A	G	G	10.43	1	1
comp101930_c2_seq1	1424	G	A	A	10.43	1	1
comp101930_c2_seq1	1442	G	T	T	10.43	1	1
comp69423_c0_seq1	181	T	G	G	10.43	1	1
comp69423_c0_seq1	183	T	A	A	10.43	1	1
comp69423_c0_seq1	186	G	T	T	92.7	3	3
comp82975_c0_seq1	215	C	G	G	46.92	2	2
comp82975_c0_seq1	239	A	G	G	46.92	2	2
comp82975_c0_seq1	743	A	G	G	58.21	2	2
comp82975_c0_seq1	747	G	A	A	58.21	2	2
comp82975_c0_seq1	1412	G	A	A	10.43	1	1
comp75277_c0_seq1	246	T	C	Y	82.71	4	3
comp75277_c0_seq1	535	C	T	T	12.49	1	1
comp85416_c0_seq1	111	T	A	W	32.36	10	2
comp85416_c0_seq1	272	A	C	M	30.11	6	2
comp85416_c0_seq1	304	T	C	Y	86.17	8	4
comp85416_c0_seq1	424	G	A	R	509.32	27	16
comp85416_c0_seq1	484	T	C	Y	448.56	28	16
comp85416_c0_seq1	824	A	G	R	907.69	49	26
comp94420_c0_seq1	1121	A	T	T	14.88	1	1
comp51174_c0_seq1	143	T	C	C	14.88	1	1
comp51174_c0_seq1	147	T	A	A	14.88	1	1
comp51174_c0_seq1	223	C	T	T	14.88	1	1
comp51174_c0_seq1	299	T	G	G	14.88	1	1
comp51174_c0_seq1	323	A	T	T	14.88	1	1
comp51174_c0_seq1	369	G	C	C	14.92	2	2
comp51174_c0_seq1	377	C	A	A	14.92	2	2
comp95118_c0_seq1	245	A	G	G	68.27	3	3
comp95118_c0_seq1	286	T	C	C	35.63	2	2
comp95118_c0_seq1	287	A	C	C	35.63	2	2
comp95118_c0_seq1	385	G	T	T	35.63	2	2
comp95118_c0_seq1	388	C	G	G	35.63	2	2
comp95118_c0_seq1	396	C	T	T	35.63	2	2
comp95118_c0_seq1	434	G	A	A	35.63	2	2
comp95118_c0_seq1	481	T	C	C	23.88	2	2
comp95118_c0_seq1	512	T	C	C	23.88	2	2
comp95118_c0_seq1	513	G	A	A	23.88	2	2
comp95118_c0_seq1	517	A	G	G	23.88	2	2
comp95118_c0_seq1	532	T	G	G	23.88	2	2
comp93137_c0_seq1	284	A	C	M	35.39	9	2
comp1409311_c0_seq1	261	C	A	A	14.88	1	1
comp102809_c0_seq1	113	A	G	G	58.21	2	2
comp102809_c0_seq1	152	G	A	A	102.15	3	3
comp102809_c0_seq1	164	G	A	A	146.46	5	5
comp102809_c0_seq1	208	C	T	T	146.42	4	4
comp102809_c0_seq1	212	C	G	G	146.46	5	5
comp102809_c0_seq1	276	T	C	C	200.68	6	6
comp102809_c0_seq1	278	C	T	T	201.59	6	6
comp102809_c0_seq1	312	A	G	G	157.02	5	5
comp102809_c0_seq1	319	C	T	T	112.54	4	4
comp102809_c0_seq1	336	G	A	A	201.59	6	6
comp102809_c0_seq1	404	A	G	G	268.91	8	8
comp102809_c0_seq1	448	C	T	T	302.31	9	9
comp102809_c0_seq1	499	A	G	G	146.42	4	4
comp102809_c0_seq1	501	T	C	C	146.46	5	5
comp102809_c0_seq1	522	A	G	G	130.45	5	5
comp102809_c0_seq1	603	T	G	G	67.8	3	3
comp102809_c0_seq1	798	C	T	T	68.27	3	3
comp102809_c0_seq1	815	T	A	A	101.24	4	4
comp102809_c0_seq1	817	C	T	T	134.43	5	5
comp102809_c0_seq1	829	A	G	G	134.43	5	5
comp102809_c0_seq1	1113	T	A	A	135.12	4	4
comp102809_c0_seq1	1523	C	G	G	1744.89	44	44
comp102809_c0_seq1	1628	C	T	T	2583.18	65	65
comp102809_c0_seq1	1930	A	G	G	2413.29	58	58
comp102809_c0_seq1	2037	G	A	A	2691.92	71	71
comp102809_c0_seq1	2256	G	A	A	1219.63	34	34
comp102809_c0_seq1	2315	A	G	G	1129.42	26	26
comp102809_c0_seq1	2385	T	C	C	1219.32	31	31
comp102809_c0_seq1	2392	T	C	C	1219.5	31	31
comp102809_c0_seq1	2456	A	G	G	1297.52	33	33
comp102809_c0_seq1	2654	A	C	M	187.88	39	8
comp102809_c0_seq1	2666	A	C	M	40.59	36	4
comp102809_c0_seq1	2667	G	A	R	34.57	38	4
comp102809_c0_seq1	2670	A	G	R	34.57	38	4
comp102809_c0_seq1	2769	G	A	A	1888.93	48	48
comp102809_c0_seq1	2794	G	A	A	1811.06	52	52
comp102809_c0_seq1	3055	A	G	G	1241.63	33	33
comp102809_c0_seq1	3168	A	G	G	1050.88	26	26
comp102809_c0_seq1	3304	G	A	A	672.84	22	22
comp102809_c0_seq1	3305	A	C	C	672.84	22	22
comp102809_c0_seq1	3308	T	A	A	644.13	21	21
comp102809_c0_seq1	3312	C	T	T	622.03	21	21
comp102809_c0_seq1	3343	A	C	C	875.77	26	26
comp102809_c0_seq1	3445	T	C	Y	152.84	8	5
comp102809_c0_seq1	3446	G	A	R	111.12	7	4
comp102809_c0_seq1	3569	G	A	A	1096.25	31	31
comp102809_c0_seq1	3736	A	G	G	1074.11	30	30
comp102809_c0_seq1	3795	C	T	T	1194.39	33	33
comp102809_c0_seq1	3811	G	T	T	1084.95	31	31
comp102809_c0_seq1	3836	G	A	A	895.09	24	24
comp102809_c0_seq1	3963	G	T	T	626.75	18	18
comp102809_c0_seq1	4218	G	A	A	1027.93	31	31
comp102809_c0_seq1	4286	G	A	R	279.87	23	11
comp102809_c0_seq1	4292	G	A	R	273.8	25	11
comp102809_c0_seq1	4337	C	T	Y	43.88	33	5
comp102809_c0_seq1	4345	G	A	R	46.89	32	5
comp102809_c0_seq1	4351	A	G	R	13.65	33	4
comp102809_c0_seq1	4355	T	A	W	10.82	37	4
comp102809_c0_seq1	4497	G	T	K	41.4	7	2
comp61244_c1_seq1	1052	G	A	R	12.01	2	1
comp31014_c0_seq1	474	T	G	G	12.49	1	1
comp61254_c0_seq1	1706	A	C	M	71.76	68	15
comp90574_c0_seq1	176	G	T	T	11.01	1	1
comp10322_c1_seq1	9	A	T	T	14.87	1	1
comp10322_c1_seq1	26	C	A	A	14.3	1	1
comp86869_c0_seq1	99	C	T	T	97.43	3	3
comp86869_c0_seq1	162	G	A	A	191.03	8	8
comp38792_c0_seq1	578	G	C	C	79.56	3	3
comp56893_c0_seq1	193	T	A	W	32.37	10	2
comp56893_c0_seq1	194	A	T	W	32.37	10	2
comp56893_c0_seq1	1025	A	G	R	47.42	4	2
comp102242_c2_seq1	80	A	C	M	50.38	5	3
comp102242_c2_seq1	123	A	G	R	172.62	9	6
comp102242_c2_seq1	191	G	T	K	208.31	12	8
comp102242_c2_seq1	209	C	T	Y	330.41	16	11
comp102242_c2_seq1	264	T	C	Y	205.3	14	7
comp102242_c2_seq1	305	T	C	Y	160.53	12	5
comp102242_c2_seq1	439	T	G	K	14.47	16	2
comp102242_c2_seq1	473	T	C	Y	142.38	19	5
comp102242_c2_seq1	476	T	A	W	142.47	19	5
comp102242_c2_seq1	708	G	A	R	131.97	16	6
comp102242_c2_seq1	725	A	G	R	131.97	16	6
comp102242_c2_seq1	731	A	T	W	134.98	15	6
comp84064_c1_seq1	37	A	C	M	12	2	1
comp84064_c1_seq1	48	C	T	Y	11.61	16	2
comp58438_c1_seq1	281	C	A	A	10.43	1	1
comp92658_c0_seq1	230	A	G	G	102.15	3	3
comp70442_c0_seq1	259	A	C	C	23.88	2	2
comp70442_c0_seq1	263	A	G	G	23.88	2	2
comp70442_c0_seq1	315	T	C	Y	16.22	3	2
comp70442_c0_seq1	385	T	A	A	23.88	2	2
comp70442_c0_seq1	394	T	C	C	23.88	2	2
comp70442_c0_seq1	411	T	A	A	23.88	2	2
comp102381_c0_seq1	133	A	G	G	311.23	11	11
comp102381_c0_seq1	148	A	C	C	411.53	14	14
comp102381_c0_seq1	159	T	C	C	411.53	14	14
comp102381_c0_seq1	182	C	T	T	511.83	17	17
comp102381_c0_seq1	215	T	G	G	958.24	30	30
comp102381_c0_seq1	268	A	G	G	1605.69	47	47
comp102381_c0_seq1	269	T	C	C	1605.69	47	47
comp102381_c0_seq1	299	T	A	A	1663.01	52	49
comp102381_c0_seq1	357	C	T	Y	66.53	167	19
comp102381_c0_seq1	372	T	C	Y	55.85	180	20
comp102381_c0_seq1	383	T	A	W	6018.28	196	176
comp102381_c0_seq1	433	A	G	G	5846.52	161	161
comp102381_c0_seq1	488	A	G	G	6438.16	192	176
comp102381_c0_seq1	495	A	G	G	7087.14	182	182
comp102381_c0_seq1	527	C	T	Y	261.39	185	25
comp102381_c0_seq1	542	T	A	W	394.85	191	30
comp102381_c0_seq1	551	G	A	R	432.23	187	31
comp102381_c0_seq1	578	C	T	Y	732.35	195	40
comp102381_c0_seq1	605	G	A	R	668.51	190	34
comp102381_c0_seq1	710	G	A	R	874.39	195	38
comp102381_c0_seq1	713	T	C	Y	803.02	187	36
comp102381_c0_seq1	773	A	C	M	88.35	176	20
comp102381_c0_seq1	786	C	T	Y	12.29	166	17
comp102381_c0_seq1	790	T	A,C	M	6605.65	180	160
comp102381_c0_seq1	794	G	C	S	169.48	175	22
comp102381_c0_seq1	818	G	A	R	147.84	187	21
comp102381_c0_seq1	857	A	G	R	28.53	168	16
comp102381_c0_seq1	994	T	G	K	305.75	149	20
comp102381_c0_seq1	1013	T	C	Y	654.56	152	31
comp102381_c0_seq1	1019	G	A	R	933.12	158	39
comp102381_c0_seq1	1064	T	A	W	1725.39	180	66
comp102381_c0_seq1	1112	A	T	W	1519.04	178	61
comp102381_c0_seq1	1163	T	C	Y	722.4	155	33
comp102381_c0_seq1	1227	T	C	Y	573.51	150	28
comp102381_c0_seq1	1259	A	T	W	427.94	170	27
comp102381_c0_seq1	1262	T	C	Y	403.86	180	27
comp102381_c0_seq1	1277	C	G	S	75.1	138	15
comp102381_c0_seq1	1280	G	A	R	23.95	157	15
comp102381_c0_seq1	1285	T	C	Y	231.48	156	22
comp102381_c0_seq1	1304	A	G	G	5928.68	157	157
comp102381_c0_seq1	1322	C	T	Y	369.54	158	26
comp102381_c0_seq1	1328	C	G	S	408.7	160	27
comp102381_c0_seq1	1343	A	G	R	467.36	158	29
comp102381_c0_seq1	1409	T	C	Y	4583.32	155	124
comp102381_c0_seq1	1424	T	G	K	301.25	169	27
comp102381_c0_seq1	1430	A	G	R	201.69	165	24
comp102381_c0_seq1	1442	T	A	W	122.67	147	19
comp102381_c0_seq1	1444	A	G	R	119.66	145	19
comp102381_c0_seq1	1484	C	T	T	4424.53	128	120
comp102381_c0_seq1	1552	G	C	S	160.04	102	16
comp102381_c0_seq1	1557	T	C	Y	65.75	100	13
comp102381_c0_seq1	1559	T	C	Y	154.02	106	16
comp102381_c0_seq1	1602	G	A	R	344.17	114	23
comp102381_c0_seq1	1648	G	C	S	75.7	108	13
comp102381_c0_seq1	1701	A	G	G	3388.22	90	90
comp102381_c0_seq1	1786	G	T	T	3880.41	99	99
comp102381_c0_seq1	1944	T	C	C	4711.83	116	116
comp102381_c0_seq1	2017	G	T	T	2948.86	81	81
comp102381_c0_seq1	2024	G	A	A	2997.45	82	82
comp103098_c0_seq1	60	G	T	K	14.46	16	2
comp103098_c0_seq1	129	C	T	Y	12.63	29	3
comp103098_c0_seq1	278	C	T	Y	10.22	9	2
comp103098_c0_seq1	279	G	C	S	13.02	8	2
comp103098_c0_seq1	371	G	T	K	25.4	8	2
comp103098_c0_seq1	410	G	T	K	122.61	5	4
comp103098_c0_seq1	442	G	A	R	86.13	6	3
comp103098_c0_seq1	500	G	T	K	42.7	5	2
comp103098_c0_seq1	542	A	G	R	21.41	5	2
comp103098_c0_seq1	544	T	C	Y	21.41	5	2
comp103098_c0_seq1	560	G	A	R	18.43	7	2
comp103098_c0_seq1	622	T	C	Y	27.11	8	2
comp103098_c0_seq1	649	A	G	R	27.15	10	3
comp103098_c0_seq1	723	C	T	Y	18.43	6	2
comp103098_c0_seq1	734	C	T	Y	24.39	4	2
comp103098_c0_seq1	784	G	A	R	10.49	5	2
comp103098_c0_seq1	1058	C	T	Y	36.45	17	3
comp103098_c0_seq1	1839	G	C	S	89.18	6	4
comp103098_c0_seq1	1869	G	T	K	89.14	5	3
comp103098_c0_seq1	2034	A	C	M	137.58	9	6
comp103098_c0_seq1	2042	A	C	M	140.59	8	6
comp68841_c0_seq1	111	A	G	G	10.43	1	1
comp68841_c0_seq1	474	T	G	G	14.88	1	1
comp41969_c0_seq1	207	G	A	A	58.26	3	3
comp100312_c1_seq1	403	T	A	A	10.43	1	1
comp100312_c1_seq1	406	G	A	A	10.43	1	1
comp100312_c1_seq1	415	A	C	C	81.41	3	3
comp100312_c1_seq1	534	A	G	G	23.88	2	2
comp100312_c1_seq1	567	T	C	C	199.19	8	8
comp100312_c1_seq1	593	G	A	A	254.26	10	10
comp100312_c1_seq1	624	G	A	A	177.56	7	7
comp100312_c1_seq1	628	C	G	G	177.56	7	7
comp100312_c1_seq1	656	A	G	G	487.82	17	17
comp100312_c1_seq1	663	T	C	C	487.82	17	17
comp100312_c1_seq1	680	C	T	T	601.44	23	22
comp100312_c1_seq1	684	A	T	T	690.76	23	23
comp100312_c1_seq1	758	G	A	A	1001.5	30	30
comp100312_c1_seq1	779	T	G	G	1218.62	34	34
comp100312_c1_seq1	880	T	C	C	1163.34	40	38
comp100312_c1_seq1	899	T	C	C	1274.84	41	40
comp100312_c1_seq1	998	G	A	A	435.97	12	12
comp100312_c1_seq1	1004	G	A	A	391.24	11	11
comp100312_c1_seq1	1019	C	G	G	422.34	14	14
comp100312_c1_seq1	1067	C	T	T	666.82	21	21
comp100312_c1_seq1	1080	A	G	R	405.45	25	16
comp100312_c1_seq1	1084	G	A	R	405.45	25	16
comp100312_c1_seq1	1093	C	T	Y	237.53	28	10
comp100312_c1_seq1	1099	T	C	Y	323.32	25	14
comp100312_c1_seq1	1112	A	G	G	986.53	29	29
comp100312_c1_seq1	1159	C	T	Y	213.62	44	11
comp100312_c1_seq1	1172	G	A	R	290.62	46	13
comp100312_c1_seq1	1249	T	A	W	484.77	110	23
comp100312_c1_seq1	1324	A	G	R	571.06	137	26
comp100312_c1_seq1	1360	A	G	R	934.77	183	43
comp100312_c1_seq1	1409	T	A	W	691.28	150	31
comp100312_c1_seq1	1431	A	G	R	317.86	114	17
comp100312_c1_seq1	1449	G	C	S	23.1	89	9
comp100312_c1_seq1	1762	G	T	T	2478.2	66	66
comp100312_c1_seq1	2027	G	C	S	219.43	33	10
comp100312_c1_seq1	2043	T	C	Y	714.54	42	31
comp100312_c1_seq1	2082	A	T	W	1260.85	70	53
comp100312_c1_seq1	2083	A	G	R	1363.42	73	56
comp100312_c1_seq1	2125	C	G	S	1297.82	86	56
comp100312_c1_seq1	2141	A	G	R	1150.57	83	52
comp100312_c1_seq1	2173	T	G	K	849.15	70	37
comp100312_c1_seq1	2183	C	T	Y	956.85	71	41
comp100312_c1_seq1	2201	T	C	Y	729.37	55	29
comp100312_c1_seq1	2232	T	A	W	862.41	51	30
comp100312_c1_seq1	2295	A	G	R	1070.73	73	37
comp100312_c1_seq1	2303	A	G	R	1156.28	73	40
comp100312_c1_seq1	2331	G	A	R	1005.87	71	35
comp100312_c1_seq1	2332	C	A	M	930.3	72	35
comp100312_c1_seq1	2365	G	A	R	875.65	75	32
comp100312_c1_seq1	2387	A	G	R	865.43	78	32
comp100312_c1_seq1	2411	T	A	W	837.97	75	30
comp100312_c1_seq1	2463	G	A	R	326.83	52	14
comp100312_c1_seq1	2470	A	C	M	257.14	47	12
comp100312_c1_seq1	2485	T	G	K	89.99	35	7
comp100312_c1_seq1	2492	A	G	R	26.14	34	5
comp100312_c1_seq1	2497	G	A	R	23.15	35	5
comp100312_c1_seq1	2528	G	T	K	29.11	17	4
comp100312_c1_seq1	2531	T	C	Y	32.12	16	4
comp52622_c0_seq1	1171	G	A	A	961.02	29	29
comp52622_c0_seq1	1174	C	G	G	921.01	28	28
comp52622_c0_seq1	1180	C	T	T	802.84	25	25
comp74206_c0_seq1	94	A	G	G	14.88	1	1
comp99257_c0_seq1	45	T	C	C	46.92	2	2
comp99257_c0_seq1	47	C	T	T	46.92	2	2
comp99257_c0_seq1	48	A	T	T	46.92	2	2
comp99257_c0_seq1	50	A	T	T	46.92	2	2
comp99257_c0_seq1	276	C	A	M	40.98	92	11
comp99257_c0_seq1	282	C	T	Y	19.63	89	10
comp99257_c0_seq1	297	G	A	R	47	100	11
comp99257_c0_seq1	304	A	G	R	62.05	95	11
comp99257_c0_seq1	313	G	A	R	165.99	103	15
comp99257_c0_seq1	321	G	A	R	213.56	87	15
comp99257_c0_seq1	335	G	A	R	176.82	89	14
comp99257_c0_seq1	340	T	C	Y	161.15	85	13
comp99257_c0_seq1	346	A	G	R	151.79	77	12
comp99257_c0_seq1	349	G	C	S	133.73	83	12
comp99257_c0_seq1	351	C	T	Y	133.73	80	12
comp99257_c0_seq1	359	A	C	M	431.97	92	22
comp99257_c0_seq1	378	G	A	R	569.76	98	28
comp99257_c0_seq1	386	G	A	R	353.77	90	21
comp99257_c0_seq1	388	T	G	K	489.77	93	25
comp99257_c0_seq1	389	A	T	W	489.76	93	25
comp99257_c0_seq1	418	C	G	S	2466.41	134	74
comp99257_c0_seq1	448	A	G	R	2248.92	163	80
comp99257_c0_seq1	473	A	G	R	1915.21	172	71
comp99257_c0_seq1	524	A	G	R	944.27	112	39
comp99257_c0_seq1	532	G	A	R	767.62	121	35
comp99257_c0_seq1	553	A	G	R	653.05	98	29
comp99257_c0_seq1	571	G	A	R	499.49	80	24
comp99257_c0_seq1	587	C	G	S	260.57	67	17
comp99257_c0_seq1	608	A	G	R	21.04	38	6
comp99257_c0_seq1	609	G	T	K	21.04	38	6
comp99257_c0_seq1	614	T	C	Y	30.04	35	6
comp95918_c0_seq1	706	A	G	R	23.36	12	2
comp95918_c0_seq1	862	C	A	M	68.07	13	3
comp95918_c0_seq1	2542	G	C	C	14.88	1	1
comp71532_c0_seq1	1281	T	A	W	11.23	15	2
comp71532_c0_seq1	1568	C	T	Y	68.95	7	3
comp71532_c0_seq1	1569	T	C	Y	110.67	8	4
comp71532_c0_seq1	1570	T	A	W	110.67	8	4
comp2869_c0_seq1	631	A	C	C	58.21	2	2
comp96319_c0_seq1	11	A	C	C	14.88	1	1
comp96319_c0_seq1	67	T	A	A	234.98	7	7
comp96319_c0_seq1	87	T	A	A	335.22	10	10
comp96319_c0_seq1	93	T	A	A	290.51	9	9
comp96319_c0_seq1	102	C	T	T	335.22	10	10
comp96319_c0_seq1	1470	C	A	M	15.19	11	2
comp100178_c1_seq1	126	G	A	A	14.92	2	2
comp100178_c1_seq1	613	G	A	A	58.26	3	3
comp31576_c0_seq1	355	A	G	G	11.55	1	1
comp62601_c0_seq1	107	A	G	G	14.88	1	1
comp62601_c0_seq1	486	A	C	C	58.26	3	3
comp39833_c0_seq1	503	A	T	T	14.88	1	1
comp86394_c0_seq1	1042	G	T	K	741.25	46	23
comp86394_c0_seq1	1470	T	C	Y	979.21	55	30
comp86394_c0_seq1	2123	C	T	Y	892.29	53	27
comp86394_c0_seq1	2231	T	C	Y	846.6	59	25
comp86394_c0_seq1	2297	A	G	R	601.72	47	21
comp86394_c0_seq1	2766	T	A	A	14.88	1	1
comp86394_c0_seq1	2768	G	A	A	14.88	1	1
comp88217_c0_seq1	1781	T	G	K	169.06	19	7
comp88217_c0_seq1	1782	A	T	W	70.11	12	4
comp88217_c0_seq1	1783	A	T	W	59.92	11	3
comp88217_c0_seq1	1991	G	A	A	102.15	3	3
comp88217_c0_seq1	2250	T	C	C	14.88	1	1
comp88217_c0_seq1	2305	A	G	G	58.21	2	2
comp88636_c0_seq1	131	C	A	M	24.85	4	2
comp96764_c4_seq1	91	T	C	Y	368.72	20	14
comp96764_c4_seq1	146	A	T	T	902.16	31	29
comp96764_c4_seq1	159	A	G	R	916.54	34	30
comp96764_c4_seq1	163	G	A	R	1051.58	42	38
comp96764_c4_seq1	204	A	G	R	90.62	53	7
comp96764_c4_seq1	213	G	A	R	111.66	42	7
comp96764_c4_seq1	244	G	A	R	1245.28	49	42
comp96764_c4_seq1	259	A	G	R	849.63	37	31
comp96764_c4_seq1	269	G	A	R	868.25	37	30
comp96764_c4_seq1	356	A	T	W	245.08	24	11
comp96764_c4_seq1	369	C	T	Y	187.24	22	9
comp96764_c4_seq1	370	T	G	K	187.24	22	9
comp96764_c4_seq1	381	T	C	Y	214.65	25	10
comp96764_c4_seq1	395	T	C	Y	192.96	25	9
comp96764_c4_seq1	416	T	C	Y	201.69	25	9
comp96764_c4_seq1	436	G	A	R	207.71	22	9
comp96764_c4_seq1	445	A	G	R	241.15	23	10
comp96764_c4_seq1	452	T	C	Y	332.43	26	13
comp96764_c4_seq1	456	T	C	Y	332.43	26	13
comp96764_c4_seq1	473	C	T	Y	692.07	53	27
comp96764_c4_seq1	476	C	T	Y	800.94	56	31
comp96764_c4_seq1	486	A	G	R	763.23	72	30
comp96764_c4_seq1	506	G	A	R	920.5	85	36
comp96764_c4_seq1	509	C	T	Y	48	88	12
comp96764_c4_seq1	510	T	C	Y	1240.81	92	41
comp96764_c4_seq1	531	G	A	R	15.04	103	12
comp96764_c4_seq1	542	T	A	W	1217.69	105	48
comp96764_c4_seq1	581	C	T	Y	694	70	27
comp96764_c4_seq1	599	A	G	R	217.26	61	12
comp86515_c2_seq1	614	T	C	C	158.86	5	5
comp68140_c0_seq1	483	C	T	T	14.92	2	2
comp94620_c0_seq1	311	C	T	T	14.88	1	1
comp94620_c0_seq1	316	G	T	T	14.88	1	1
comp94004_c0_seq1	318	A	G	R	147.49	7	5
comp94004_c0_seq1	321	G	A	R	191.71	8	6
comp94004_c0_seq1	326	T	C	Y	21.86	5	2
comp94004_c0_seq1	372	A	G	R	41.34	6	2
comp94004_c0_seq1	407	C	T	Y	144.01	12	6
comp94004_c0_seq1	427	T	A	W	144.01	11	6
comp94004_c0_seq1	478	T	C	Y	80.86	4	3
comp103538_c1_seq1	191	A	T	T	46.92	2	2
comp103538_c1_seq1	193	A	G	G	46.92	2	2
comp103538_c1_seq1	228	T	C	C	14.88	1	1
comp103538_c1_seq1	2231	C	T	T	79.56	3	3
comp103538_c1_seq1	2539	G	A	A	79.56	3	3
comp103538_c1_seq1	2725	C	T	Y	193.32	18	8
comp103538_c1_seq1	2727	G	T	K	250.08	14	9
comp103538_c1_seq1	2749	T	C	Y	147.45	22	6
comp103538_c1_seq1	2802	G	A	R	164.47	26	7
comp103538_c1_seq1	2981	T	C	Y	74.97	6	3
comp100941_c0_seq1	969	C	T	Y	29.37	11	2
comp424427_c0_seq1	401	T	G	G	14.85	1	1
comp77110_c0_seq1	284	G	T	T	14.88	1	1
comp77110_c0_seq1	824	C	A	A	58.21	2	2
comp77110_c0_seq1	1024	A	G	G	46.92	2	2
comp88281_c0_seq1	1552	T	A	W	2089.33	132	62
comp88281_c0_seq1	2240	G	A	R	2815.19	175	86
comp88281_c0_seq1	2609	A	G	R	2560.15	139	78
comp88281_c0_seq1	2669	T	C	Y	1305.83	75	41
comp88281_c0_seq1	2745	T	C	Y	20.37	13	2
comp88281_c0_seq1	2767	T	A	A	58.21	2	2
comp88281_c0_seq1	2769	C	A	A	58.21	2	2
comp52696_c0_seq1	176	T	C	C	14.88	1	1
comp61379_c0_seq1	280	G	T	K	134.34	91	10
comp61379_c0_seq1	339	C	G	S	10.49	90	8
comp61379_c0_seq1	830	T	A	W	14.47	15	2
comp103496_c0_seq1	1080	T	C	C	194.37	7	7
comp103496_c0_seq1	1081	T	C	Y	173.55	8	7
comp103496_c0_seq1	1082	G	A	R	131.71	7	6
comp103496_c0_seq1	1083	G	C	S	57.63	5	4
comp103496_c0_seq1	1089	G	T	T	44.74	3	3
comp103496_c0_seq1	1096	G	A	A	44.74	3	3
comp103496_c0_seq1	1103	G	T	T	44.74	3	3
comp103496_c0_seq1	1111	C	T	T	44.74	3	3
comp103496_c0_seq1	1112	G	A	A	44.74	3	3
comp103496_c0_seq1	1132	C	A	A	44.74	3	3
comp103496_c0_seq1	1133	C	T	T	44.74	3	3
comp103496_c0_seq1	1142	C	T	T	44.74	3	3
comp82413_c2_seq1	155	T	G	K	50.43	3	2
comp88560_c0_seq1	46	T	G	G	14.79	1	1
comp88560_c0_seq1	142	G	A	R	527.23	79	18
comp88560_c0_seq1	359	A	G	R	1591.16	199	53
comp88560_c0_seq1	388	A	G	R	1482.21	200	48
comp88560_c0_seq1	475	T	C	Y	1800.42	200	56
comp88560_c0_seq1	482	G	C	S	1582	199	52
comp88560_c0_seq1	592	A	G	R	1370.41	200	49
comp88560_c0_seq1	607	C	A	M	1394.99	200	49
comp88560_c0_seq1	732	G	A	R	1214.28	134	45
comp88560_c0_seq1	745	G	A	R	180.56	95	11
comp81222_c0_seq1	93	G	A	R	130.9	7	5
comp81222_c0_seq1	273	T	A	W	11.61	21	2
comp81222_c0_seq1	385	T	G	K	61.45	15	3
comp81222_c0_seq1	607	T	C	Y	41.4	6	2
comp81222_c0_seq1	658	T	G	G	14.88	1	1
comp102317_c0_seq1	40	C	A	A	266.08	9	9
comp102317_c0_seq1	49	A	G	G	266.08	9	9
comp102317_c0_seq1	56	C	A	A	266.08	9	9
comp102317_c0_seq1	654	T	C	Y	381.34	19	12
comp102317_c0_seq1	663	C	T	Y	238.88	18	9
comp102317_c0_seq1	1871	T	C	Y	15.41	42	6
comp102317_c0_seq1	1931	G	A	R	258.27	51	17
comp102317_c0_seq1	1949	C	T	Y	234.75	47	17
comp102317_c0_seq1	1958	C	A	M	411.58	53	23
comp102317_c0_seq1	1980	C	T	Y	417.6	53	23
comp102317_c0_seq1	2357	C	T	T	731.72	24	23
comp102317_c0_seq1	2375	A	G	G	686.97	21	21
comp102317_c0_seq1	2383	T	C	C	677.09	24	22
comp102317_c0_seq1	2400	T	C	C	525.66	20	18
comp102317_c0_seq1	2405	G	C	C	459.29	18	16
comp102317_c0_seq1	2415	A	G	R	417.62	18	15
comp102317_c0_seq1	2420	A	G	G	393.97	16	14
comp102317_c0_seq1	2429	T	C	Y	207.55	10	8
comp102317_c0_seq1	2434	T	C	C	214.79	9	8
comp102317_c0_seq1	2436	A	G	G	214.79	9	8
comp102317_c0_seq1	2454	T	C	Y	207.39	10	8
comp87792_c0_seq1	207	G	A	A	35.63	2	2
comp87792_c0_seq1	218	A	G	G	35.63	2	2
comp87792_c0_seq1	240	T	A	A	35.63	2	2
comp367410_c0_seq1	8	A	T	T	14.88	1	1
comp90068_c0_seq1	506	A	G	R	20.37	14	2
comp90068_c0_seq1	783	T	A	W	20.37	14	2
comp26944_c0_seq1	45	T	C	Y	77.09	9	3
comp97606_c1_seq1	979	G	T	K	100.84	19	6
comp97606_c1_seq1	2189	G	A	A	14.88	1	1
comp84832_c0_seq1	498	T	A	A	14.88	1	1
comp84832_c0_seq1	1013	A	G	R	50.43	3	2
comp103181_c0_seq1	19	C	A	A	74.84	3	3
comp103181_c0_seq1	25	C	T	T	74.84	3	3
comp103181_c0_seq1	49	T	C	C	160.72	5	5
comp103181_c0_seq1	178	A	G	R	57.56	8	3
comp103181_c0_seq1	207	A	G	R	215.54	13	8
comp103181_c0_seq1	210	C	T	Y	257.42	14	9
comp103181_c0_seq1	273	A	G	R	276.7	18	9
comp103181_c0_seq1	297	A	T	W	199.28	17	7
comp103181_c0_seq1	333	A	G	R	229.71	17	8
comp103181_c0_seq1	353	A	T	W	348.77	19	10
comp103181_c0_seq1	369	A	G	R	345.04	20	10
comp103181_c0_seq1	444	G	A	R	146.23	15	5
comp103181_c0_seq1	448	A	G	R	146.23	16	5
comp103181_c0_seq1	474	T	C	Y	140.83	12	5
comp103181_c0_seq1	490	A	G	R	60.54	8	3
comp103181_c0_seq1	1111	T	A	A	48.77	2	2
comp103181_c0_seq1	1122	A	C	C	10.43	1	1
comp103181_c0_seq1	1134	C	T	T	10.43	1	1
comp74005_c0_seq1	33	T	A	A	14.88	1	1
comp192592_c0_seq1	300	T	A	A	14.88	1	1
comp192592_c0_seq1	679	G	C	C	58.21	2	2
comp103442_c1_seq1	143	G	A	A	1303.64	43	43
comp103442_c1_seq1	154	C	T	T	1318.14	40	40
comp103442_c1_seq1	189	T	C	C	972.71	31	29
comp103442_c1_seq1	232	C	T	T	819.27	28	28
comp103442_c1_seq1	233	A	C	C	774.92	27	27
comp103442_c1_seq1	242	A	G	R	217.32	43	15
comp103442_c1_seq1	250	G	T	T	1270.21	45	45
comp103442_c1_seq1	261	T	A	W	537.64	43	24
comp103442_c1_seq1	270	C	T	T	1075.84	39	39
comp103442_c1_seq1	271	G	A	R	394.25	39	19
comp103442_c1_seq1	287	G	A	R	457.7	49	22
comp103442_c1_seq1	321	A	T	W	984.56	59	34
comp103442_c1_seq1	333	A	G	R	1076.35	56	38
comp103442_c1_seq1	346	C	T	Y	354.5	59	16
comp103442_c1_seq1	364	A	C	C	2109.57	65	65
comp103442_c1_seq1	378	T	C	Y	1088.84	54	36
comp103442_c1_seq1	387	C	A	M	363.85	46	15
comp103442_c1_seq1	461	G	A	R	56.7	26	5
comp103442_c1_seq1	503	G	A	A	702.73	23	23
comp103442_c1_seq1	513	T	C	Y	333.77	24	14
comp103442_c1_seq1	516	T	C	Y	458.89	27	17
comp103442_c1_seq1	527	T	C	Y	204.56	25	8
comp103442_c1_seq1	552	A	T	W	34.82	21	4
comp103442_c1_seq1	556	A	G	R	34.82	21	4
comp103442_c1_seq1	671	T	A	W	10.79	18	3
comp103442_c1_seq1	677	A	G	R	10.79	18	3
comp103442_c1_seq1	690	T	A	W	10.79	18	3
comp103442_c1_seq1	791	G	A	R	113.43	21	6
comp103442_c1_seq1	865	T	C	Y	232.12	26	10
comp103442_c1_seq1	873	G	C	S	207.71	23	9
comp103442_c1_seq1	912	T	A	W	194.6	22	8
comp103442_c1_seq1	979	T	G	K	145.13	19	8
comp103442_c1_seq1	1004	A	T	W	144.34	22	7
comp103442_c1_seq1	1049	A	G	R	154.67	17	7
comp103442_c1_seq1	1068	A	C	M	134.34	22	7
comp103442_c1_seq1	1103	T	A	W	106.88	16	5
comp103442_c1_seq1	1190	G	A	R	66.88	19	4
comp103442_c1_seq1	1221	A	C	M	127.73	18	6
comp103442_c1_seq1	1222	G	C	S	127.73	18	6
comp103442_c1_seq1	1248	A	G	R	19.2	21	3
comp103442_c1_seq1	1250	A	G	R	19.2	21	3
comp103442_c1_seq1	1255	C	T	Y	13.39	22	3
comp103442_c1_seq1	1330	C	T	Y	226.68	21	9
comp103442_c1_seq1	1331	A	G	R	226.68	21	9
comp103442_c1_seq1	1338	A	G	R	59.81	17	5
comp103442_c1_seq1	1339	A	G	R	59.81	18	5
comp103442_c1_seq1	1352	G	A	R	162.83	19	8
comp103442_c1_seq1	1359	G	T	K	199.28	18	9
comp103442_c1_seq1	1376	G	A	R	199.28	16	9
comp103442_c1_seq1	1391	G	A	R	196.27	18	9
comp103442_c1_seq1	1410	G	A	R	168.56	20	8
comp103442_c1_seq1	1423	T	C	Y	52.88	13	4
comp103442_c1_seq1	1432	G	A	R	52.88	13	4
comp103442_c1_seq1	1447	C	T	Y	15.2	11	2
comp103442_c1_seq1	1507	A	T	W	607.05	34	20
comp103442_c1_seq1	1510	A	T	W	648.86	35	21
comp103442_c1_seq1	1579	G	A	R	162	33	8
comp103442_c1_seq1	1581	T	C	Y	84.53	28	5
comp103442_c1_seq1	1625	T	G	K	86.02	17	5
comp103442_c1_seq1	1648	T	C	Y	15.2	11	2
comp103442_c1_seq1	1649	A	G	R	37.21	11	3
comp103442_c1_seq1	1678	C	T	Y	73.65	10	4
comp103442_c1_seq1	1684	G	A	R	73.65	10	4
comp103442_c1_seq1	1687	C	A	M	73.65	10	4
comp103442_c1_seq1	3084	C	T	Y	21.73	78	6
comp103442_c1_seq1	3085	C	T	Y	48.31	78	7
comp90666_c0_seq1	19	A	G	G	135.12	4	4
comp90666_c0_seq1	701	A	T	T	2910.31	75	75
comp90666_c0_seq1	2394	C	G	G	939.45	27	27
comp1020034_c0_seq1	87	C	A	A	10.43	1	1
comp96897_c0_seq1	24	A	C	C	14.88	1	1
comp95138_c1_seq1	167	T	A	A	58.21	2	2
comp95138_c1_seq1	303	C	T	T	58.21	2	2
comp95138_c1_seq1	397	T	A	A	14.88	1	1
comp95138_c1_seq1	543	G	T	T	14.88	1	1
comp100707_c0_seq1	836	T	C	Y	44.01	23	5
comp100707_c0_seq1	873	C	A	M	27.77	16	4
comp100707_c0_seq1	892	T	C	Y	20.8	25	3
comp100707_c0_seq1	896	T	C	Y	48.71	26	6
comp100707_c0_seq1	904	T	C	Y	42.69	27	6
comp100707_c0_seq1	907	T	A	W	42.69	27	6
comp100707_c0_seq1	989	G	A	R	73.58	36	5
comp100707_c0_seq1	1031	G	A	R	59.02	32	5
comp100707_c0_seq1	1070	T	G	K	19.07	30	4
comp100707_c0_seq1	1113	G	A	R	26	26	3
comp100707_c0_seq1	1153	A	C	M	113.44	27	7
comp100707_c0_seq1	1169	G	A	R	68.71	25	6
comp100707_c0_seq1	1231	T	G	K	41.99	23	3
comp100707_c0_seq1	1723	C	G	S	28.52	25	3
comp100707_c0_seq1	2269	T	A	W	16.98	36	3
comp100707_c0_seq1	2563	T	G	G	14.88	1	1
comp436_c0_seq1	66	A	T	W	42.7	4	2
comp436_c0_seq1	367	G	T	K	124.55	10	4
comp95933_c0_seq1	597	T	C	C	14.88	1	1
comp95933_c0_seq1	3959	C	A	A	14.88	1	1
comp98303_c3_seq1	248	A	G	R	27.61	6	2
comp98303_c3_seq1	250	G	A	R	27.61	5	2
comp98303_c3_seq1	251	T	G	K	24.6	6	2
comp85217_c1_seq1	179	C	T	Y	16.46	11	2
comp85217_c1_seq1	213	T	A	W	43.77	13	3
comp85217_c1_seq1	351	A	G	R	22.47	12	3
comp85217_c1_seq1	355	G	A	R	22.47	12	3
comp85217_c1_seq1	417	G	A	R	86.06	18	5
comp85217_c1_seq1	424	C	T	Y	86.06	18	5
comp85217_c1_seq1	440	C	T	Y	58.35	18	4
comp85217_c1_seq1	467	A	G	R	37.03	18	4
comp85217_c1_seq1	476	G	C	S	22.47	13	3
comp59221_c0_seq1	17	A	T	W	15.93	7	2
comp59221_c0_seq1	72	T	C	Y	26.37	11	2
comp59221_c0_seq1	255	T	A	W	38.39	7	2
comp73396_c0_seq1	19	A	T	T	10.43	1	1
comp73396_c0_seq1	21	C	G	G	10.43	1	1
comp73396_c0_seq1	22	C	T	T	87.98	3	3
comp85940_c0_seq1	48	A	T	T	14.88	1	1
comp85940_c0_seq1	515	T	C	Y	11.57	16	2
comp85940_c0_seq1	519	C	T	Y	70.17	41	5
comp85940_c0_seq1	904	A	C	M	58.06	53	5
comp118138_c0_seq1	400	C	A	M	21.2	12	2
comp118138_c0_seq1	657	T	C	Y	11.61	16	2
comp118138_c0_seq1	2014	T	G	G	10.43	1	1
comp259382_c0_seq1	26	A	C	C	14.88	1	1
comp259382_c0_seq1	27	C	T	T	14.87	1	1
comp3329_c0_seq1	981	A	T	T	12.49	1	1
comp67900_c0_seq1	1053	A	G	G	14.88	1	1
comp71949_c0_seq1	89	T	C	C	14.88	1	1
comp71949_c0_seq1	90	C	G	G	14.88	1	1
comp71949_c0_seq1	539	T	A	W	14.47	17	2
comp102241_c3_seq1	804	T	A	A	818.22	20	20
comp99326_c3_seq1	57	T	C	C	114.39	4	4
comp90412_c0_seq1	15	G	C	C	14.88	1	1
comp90412_c0_seq1	712	G	A	A	682.67	17	17
comp82017_c0_seq1	376	T	C	C	14.88	1	1
comp82017_c0_seq1	496	C	A	A	46.92	2	2
comp91074_c1_seq1	71	T	C	C	205.32	6	6
comp91074_c1_seq1	90	G	A	A	245.25	7	7
comp91074_c1_seq1	672	T	G	K	38.4	7	2
comp91074_c1_seq1	714	T	G	G	14.88	1	1
comp93521_c0_seq1	58	C	G	G	53.49	2	2
comp93521_c0_seq1	61	T	A	A	53.49	2	2
comp93521_c0_seq1	468	C	A	A	14.88	1	1
comp93521_c0_seq1	469	C	G	G	14.88	1	1
comp93521_c0_seq1	523	G	A	A	14.88	1	1
comp93521_c0_seq1	629	C	T	T	14.88	1	1
comp93521_c0_seq1	1261	A	C	C	11.55	1	1
comp93521_c0_seq1	1317	A	G	G	12.49	1	1
comp93521_c0_seq1	1396	C	G	G	90.85	3	3
comp30984_c0_seq1	991	T	C	Y	50.43	3	2
comp67038_c0_seq1	501	G	A	A	14.88	1	1
comp79467_c0_seq1	578	A	T	T	53.49	2	2
comp79467_c0_seq1	609	A	T	T	10.43	1	1
comp102757_c0_seq1	59	A	C	M	31.27	6	2
comp93668_c0_seq1	44	T	C	Y	81.32	15	4
comp93668_c0_seq1	71	C	T	Y	75.3	17	4
comp93668_c0_seq1	192	A	G	R	257.08	17	8
comp93668_c0_seq1	245	T	C	Y	446.75	27	17
comp93668_c0_seq1	308	C	T	Y	717.53	39	23
comp93668_c0_seq1	314	C	T	Y	640.25	35	21
comp93668_c0_seq1	444	A	G	R	468.81	38	14
comp93668_c0_seq1	559	A	G	R	689.57	38	22
comp93668_c0_seq1	652	T	C	Y	132.68	9	5
comp694216_c0_seq1	398	G	A	A	14.88	1	1
comp88712_c0_seq1	1053	G	A,C	M	24.49	2	1
comp94310_c0_seq1	148	G	T	K	32.37	10	2
comp94310_c0_seq1	149	A	C	M	87.2	14	4
comp94310_c0_seq1	1038	T	C	Y	48.09	32	6
comp94310_c0_seq1	1051	G	A	R	63.14	26	6
comp94310_c0_seq1	1089	T	G	K	63.14	25	6
comp94310_c0_seq1	1110	A	C	M	11.63	19	4
comp94310_c0_seq1	1116	A	G	R	23.36	12	2
comp94310_c0_seq1	1539	T	C	Y	40.98	21	3
comp95881_c1_seq1	346	A	G	R	23.36	12	2
comp98219_c0_seq1	104	G	T	T	102.19	4	4
comp98219_c0_seq1	166	T	C	C	190.94	6	6
comp98219_c0_seq1	617	T	C	C	951	25	25
comp98219_c0_seq1	1481	C	T	T	839.09	23	23
comp98219_c0_seq1	1874	G	A	A	593.2	16	16
comp98219_c0_seq1	1931	T	C	C	414.37	12	12
comp98219_c0_seq1	1997	C	T	T	587.46	18	18
comp73896_c0_seq1	35	G	A	R	583.87	22	18
comp73896_c0_seq1	51	C	T	Y	583.9	25	21
comp73896_c0_seq1	91	G	A	R	43.05	33	4
comp73896_c0_seq1	92	G	A	R	43.05	33	4
comp95322_c2_seq1	642	A	C	M	40.99	4	2
comp92687_c0_seq1	253	A	C	C	537.25	15	15
comp92687_c0_seq1	488	T	A	A	369.56	9	9
comp92687_c0_seq1	489	C	T	T	369.56	9	9
comp84336_c0_seq1	109	T	G	G	35.63	2	2
comp84336_c0_seq1	114	A	T	T	35.63	2	2
comp84336_c0_seq1	185	T	C	Y	119.13	6	5
comp84336_c0_seq1	264	G	A	R	55.26	5	3
comp84336_c0_seq1	303	G	A	R	82.68	7	4
comp84336_c0_seq1	903	G	C	C	14.88	1	1
comp84336_c0_seq1	919	T	A	A	14.88	1	1
comp84336_c0_seq1	1036	T	A	W	77.85	5	3
comp84336_c0_seq1	1113	A	G	R	77.85	5	3
comp84336_c0_seq1	1122	T	C	Y	77.85	5	3
comp84336_c0_seq1	1144	T	C	Y	80.86	4	3
comp84336_c0_seq1	1177	G	A	A	35.63	2	2
comp84336_c0_seq1	1180	T	C	C	35.63	2	2
comp84336_c0_seq1	1186	A	C	C	35.63	2	2
comp84336_c0_seq1	1271	C	T	T	46.92	2	2
comp84336_c0_seq1	1288	A	T	T	46.96	3	3
comp84336_c0_seq1	1308	T	C	C	14.92	2	2
comp84336_c0_seq1	1330	T	C	C	14.88	1	1
comp84336_c0_seq1	1332	C	T	T	14.88	1	1
comp60555_c0_seq1	540	C	T	T	90.85	3	3
comp60555_c0_seq1	541	C	T	T	90.85	3	3
comp83774_c1_seq1	676	C	G	S	11.61	18	2
comp98637_c1_seq1	178	G	A	R	29.32	5	2
comp98637_c1_seq1	200	A	G	R	26.31	6	2
comp98637_c1_seq1	213	T	C	Y	71.03	6	3
comp98637_c1_seq1	215	T	C	Y	71.03	6	3
comp98637_c1_seq1	281	G	A	R	13.02	9	2
comp98637_c1_seq1	283	C	G	S	15.92	8	2
comp98637_c1_seq1	286	G	A	R	57.53	9	3
comp98637_c1_seq1	340	G	A	R	157.16	12	5
comp98637_c1_seq1	356	G	A	R	46.23	9	3
comp98637_c1_seq1	381	G	A	R	127.94	9	6
comp98637_c1_seq1	384	C	T	Y	127.94	9	6
comp98637_c1_seq1	403	A	G	R	18.88	7	2
comp98637_c1_seq1	425	G	T	K	21.86	5	2
comp98637_c1_seq1	430	C	A	M	21.86	5	2
comp98637_c1_seq1	434	A	G	R	21.86	5	2
comp98637_c1_seq1	446	T	C	Y	24.85	4	2
comp85184_c0_seq1	2960	A	G	R	32.37	9	2
comp51365_c0_seq1	842	G	C	C	14.92	2	2
comp56297_c0_seq1	81	A	C	C	14.88	1	1
comp56297_c0_seq1	93	T	G	G	14.88	1	1
comp56297_c0_seq1	124	A	G	G	14.92	2	2
comp56297_c0_seq1	153	C	A	A	14.88	1	1
comp56297_c0_seq1	167	T	C	C	14.88	1	1
comp56297_c0_seq1	170	T	C	C	14.88	1	1
comp56297_c0_seq1	357	C	G	G	23.88	2	2
comp56297_c0_seq1	400	A	T	T	67.84	4	4
comp56297_c0_seq1	422	G	A	A	36.57	3	3
comp56297_c0_seq1	427	A	G	G	35.2	3	3
comp56297_c0_seq1	456	T	C	C	14.88	1	1
comp100241_c0_seq1	146	A	T	W	92.15	5	3
comp100241_c0_seq1	147	A	T	W	92.15	5	3
comp100241_c0_seq1	165	A	C	M	77.1	10	3
comp100241_c0_seq1	1227	T	C	C	7412.64	200	197
comp81600_c0_seq1	1471	A	G	G	146.42	4	4
comp40511_c0_seq1	381	C	A	A	12.49	1	1
comp40511_c0_seq1	746	T	A	A	14.88	1	1
comp2861_c1_seq1	341	T	C	C	14.82	1	1
comp2861_c1_seq1	571	A	G	G	14.88	1	1
comp99629_c0_seq1	29	A	T	T	14.88	1	1
comp99629_c0_seq1	45	G	A	A	14.88	1	1
comp99629_c0_seq1	190	A	T	W	26.36	12	2
comp99629_c0_seq1	532	C	T	T	3321.04	85	85
comp99629_c0_seq1	1269	G	A	R	20.37	13	2
comp86685_c0_seq1	767	C	T	T	58.21	2	2
comp86685_c0_seq1	1046	C	T	T	14.88	1	1
comp86685_c0_seq1	1054	T	G	G	14.88	1	1
comp102322_c1_seq1	3	T	C	C	14.88	1	1
comp102322_c1_seq1	68	G	A	R	22.4	7	2
comp102322_c1_seq1	88	C	T	Y	19.42	9	2
comp102322_c1_seq1	534	A	T	W	21.16	10	3
comp86148_c0_seq1	186	A	C	M	62.49	44	5
comp86148_c0_seq1	254	T	A	W	2177.33	142	64
comp86148_c0_seq1	310	T	A	W	2985.48	175	92
comp86148_c0_seq1	431	C	A	M	3000.24	178	87
comp86148_c0_seq1	446	G	A	R	3148.45	198	90
comp86148_c0_seq1	533	T	C	Y	2926.29	198	90
comp86148_c0_seq1	646	A	T	W	320.77	133	17
comp70656_c0_seq1	382	T	C	Y	23.81	36	4
comp99693_c1_seq1	37	C	T	Y	211.1	28	9
comp99693_c1_seq1	117	C	G	S	320.25	38	14
comp99693_c1_seq1	124	G	A	R	317.24	39	14
comp99693_c1_seq1	299	A	C	M	803.23	56	26
comp99693_c1_seq1	386	A	G	R	764.93	53	24
comp99693_c1_seq1	501	T	A	W	648.72	47	20
comp99693_c1_seq1	564	C	T	Y	577.39	41	19
comp99693_c1_seq1	623	A	T	W	722.65	49	21
comp99693_c1_seq1	884	A	G	R	318.37	18	9
comp99693_c1_seq1	1003	G	T	K	643.92	29	19
comp99693_c1_seq1	1005	C	T	Y	605.12	26	18
comp99693_c1_seq1	1231	T	C	Y	876.71	41	25
comp99693_c1_seq1	1259	A	G	R	674.23	36	22
comp99693_c1_seq1	1340	T	C	Y	216.88	23	7
comp99693_c1_seq1	1382	A	G	R	219.93	23	8
comp5020_c0_seq1	117	G	T	T	14.88	1	1
comp5020_c0_seq1	258	G	A	A	14.88	1	1
comp88040_c0_seq1	66	A	G	R	398.8	21	11
comp88040_c0_seq1	143	T	A	W	1857.03	102	58
comp88040_c0_seq1	172	A	G	R	1759.49	103	54
comp88040_c0_seq1	372	C	G	S	1694.29	114	57
comp88040_c0_seq1	624	A	G	R	1671.8	116	49
comp88040_c0_seq1	784	G	A	R	2314.13	141	70
comp88040_c0_seq1	850	G	A	R	2207.92	123	70
comp88040_c0_seq1	1427	A	G	R	11.61	17	2
comp83625_c0_seq1	18	A	C	C	734.32	18	18
comp83625_c0_seq1	999	G	T	K	127.69	10	5
comp83625_c0_seq1	1000	T	G	K	56.73	8	3
comp83625_c0_seq1	1003	G	T	K	48.98	8	3
comp83625_c0_seq1	1255	G	A	R	44.41	5	2
comp82946_c0_seq1	127	A	G	G	14.88	1	1
comp82946_c0_seq1	658	A	T	T	14.88	1	1
comp96889_c2_seq1	242	T	C	Y	14.47	15	2
comp89033_c0_seq1	308	T	G	G	58.21	2	2
comp89033_c0_seq1	614	T	G	G	11.55	1	1
comp102373_c0_seq1	667	G	A	A	46.79	2	2
comp102373_c0_seq1	827	G	A	A	123.87	5	5
comp102373_c0_seq1	885	T	C	C	79.13	4	4
comp102373_c0_seq1	993	T	G	G	86.13	3	3
comp102373_c0_seq1	1437	G	A	A	46.92	2	2
comp102373_c0_seq1	1497	C	T	T	35.63	2	2
comp102373_c0_seq1	1501	C	T	T	35.63	2	2
comp102373_c0_seq1	1502	C	T	T	35.63	2	2
comp102373_c0_seq1	1543	G	A	A	35.63	2	2
comp102373_c0_seq1	1623	G	A	A	79.56	3	3
comp102373_c0_seq1	1648	A	C	C	79.56	3	3
comp102373_c0_seq1	1842	C	T	T	14.52	1	1
comp102373_c0_seq1	1847	T	G	G	14.52	1	1
comp102373_c0_seq1	1880	T	C	C	14.52	1	1
comp102373_c0_seq1	1882	G	A	A	14.52	1	1
comp102373_c0_seq1	2006	A	G	G	14.52	1	1
comp102373_c0_seq1	2047	C	T	T	14.52	1	1
comp102373_c0_seq1	2070	C	T	T	14.52	1	1
comp102373_c0_seq1	2077	T	C	C	14.52	1	1
comp93994_c0_seq1	147	T	G	K	50.43	3	2
comp93994_c0_seq1	333	T	A	A	146.42	4	4
comp93994_c0_seq1	406	T	C	Y	44.41	5	2
comp93994_c0_seq1	438	T	C	Y	44.41	6	2
comp93994_c0_seq1	491	A	G	R	21.86	5	2
comp93994_c0_seq1	670	A	G	G	14.88	1	1
comp93994_c0_seq1	1031	G	A	R	111.28	5	4
comp23033_c0_seq1	1049	A	C	M	19.63	28	4
comp88371_c0_seq1	682	A	G	R	11.61	18	2
comp73286_c0_seq1	417	G	A	A	8576.2	200	200
comp26645_c0_seq1	34	A	T	T	14.88	1	1
comp101569_c1_seq1	215	T	G	K	98.03	5	4
comp101569_c1_seq1	1108	A	G	G	58.21	2	2
comp101569_c1_seq1	1160	A	G	G	141.7	4	4
comp101569_c1_seq1	1191	C	T	T	97.43	3	3
comp101436_c0_seq1	246	G	A	A	42.2	2	2
comp101436_c0_seq1	664	G	A	A	358.27	9	9
comp85826_c0_seq1	425	T	C	Y	395.24	198	29
comp85826_c0_seq1	1422	T	G	K	68.07	12	3
comp85826_c0_seq1	1430	T	A	W	50.43	3	2
comp97236_c0_seq1	457	T	A	W	70.64	86	9
comp97236_c0_seq1	1350	T	G	K	183.92	49	9
comp100374_c7_seq1	575	A	C	C	14.88	1	1
comp100847_c1_seq1	465	A	G	G	10.43	1	1
comp103234_c3_seq1	306	A	C	M	184.66	11	6
comp103234_c3_seq1	307	A	T	W	120.59	18	5
comp103323_c0_seq1	239	G	A	A	58.21	2	2
comp103323_c0_seq1	700	T	G	K	36.62	8	2
comp103323_c0_seq1	778	C	T	Y	142.25	8	5
comp103323_c0_seq1	792	A	G	R	70.12	6	3
comp103323_c0_seq1	817	T	C	Y	70.12	6	3
comp96090_c0_seq1	81	A	G	R	33.67	8	2
comp96090_c0_seq1	1131	T	C	C	14.88	1	1
comp81107_c0_seq1	881	A	C	C	14.88	1	1
comp81107_c0_seq1	1352	A	C	C	11.55	1	1
comp86183_c0_seq1	455	T	C	Y	27.86	3	2
comp86183_c0_seq1	456	G	A	R	27.86	3	2
comp86183_c0_seq1	457	C	T	Y	27.86	3	2
comp86183_c0_seq1	466	C	T	Y	58.27	4	3
comp86183_c0_seq1	470	G	A	R	58.27	4	3
comp86183_c0_seq1	483	C	T	Y	27.86	3	2
comp86183_c0_seq1	490	C	T	Y	27.86	3	2
comp86183_c0_seq1	506	C	T	T	35.63	2	2
comp86183_c0_seq1	507	C	T	T	35.63	2	2
comp86183_c0_seq1	513	G	A	A	35.63	2	2
comp86183_c0_seq1	748	T	C	C	35.63	2	2
comp86183_c0_seq1	750	C	T	T	35.63	2	2
comp86183_c0_seq1	760	A	G	G	35.63	2	2
comp58957_c0_seq1	103	A	T	T	14.88	1	1
comp58957_c0_seq1	104	A	T	T	14.88	1	1
comp87925_c0_seq1	448	G	T	K	47.42	4	2
comp86118_c2_seq1	27	A	G	G	68.27	3	3
comp43949_c0_seq1	669	T	C	C	14.88	1	1
comp84312_c0_seq1	121	G	C	C	906.35	23	23
comp84312_c0_seq1	122	T	A	A	906.32	23	23
comp84312_c0_seq1	203	T	C	C	8836.59	200	200
comp84312_c0_seq1	361	C	G	S	3888.94	199	102
comp84312_c0_seq1	362	G	T	K	3586.9	200	95
comp84312_c0_seq1	433	A	G	G	8617.14	200	200
comp84312_c0_seq1	471	G	A	A	8215.75	196	195
comp84312_c0_seq1	540	A	G	G	3211.57	83	83
comp92990_c1_seq1	135	T	G	K	19.96	10	2
comp92990_c1_seq1	289	T	C	Y	47.46	5	3
comp92990_c1_seq1	339	G	A	R	35.42	9	3
comp92990_c1_seq1	435	A	G	R	38.39	7	2
comp92990_c1_seq1	472	T	C	Y	38.39	7	2
comp92990_c1_seq1	638	T	C	Y	41.4	10	2
comp92990_c1_seq1	1171	G	A	A	102.15	3	3
comp206702_c0_seq1	556	T	C	C	14.88	1	1
comp94535_c0_seq1	591	A	G	R	93.96	101	10
comp94535_c0_seq1	1560	C	A	M	120.73	200	29
comp100498_c1_seq1	222	A	G	R	28.17	9	2
comp89086_c2_seq1	398	C	T	T	14.85	1	1
comp89086_c2_seq1	643	G	A	A	14.85	1	1
comp102285_c4_seq1	1081	A	T	W	29.37	12	2
comp102285_c4_seq1	2083	G	T	T	14.88	1	1
comp82724_c0_seq1	75	T	G	K	26.36	11	2
comp68557_c0_seq1	301	C	T	T	58.21	2	2
comp68557_c0_seq1	323	C	T	T	58.21	2	2
comp68557_c0_seq1	643	A	T	T	146.42	4	4
comp68557_c0_seq1	851	T	C	C	14.92	2	2
comp68557_c0_seq1	873	A	C	C	14.88	1	1
comp66162_c0_seq1	46	C	T	T	14.88	1	1
comp66162_c0_seq1	114	C	G	G	14.88	1	1
comp66162_c0_seq1	232	T	A	A	102.19	4	4
comp83490_c0_seq1	315	G	A	A	46.92	2	2
comp83490_c0_seq1	320	T	A	A	46.96	3	3
comp83490_c0_seq1	335	A	G	G	14.92	2	2
comp83490_c0_seq1	705	C	T	T	79.56	3	3
comp83490_c0_seq1	792	G	A	A	35.63	2	2
comp83490_c0_seq1	797	T	C	C	68.27	3	3
comp83490_c0_seq1	811	A	G	G	112.54	4	4
comp83490_c0_seq1	813	G	T	T	112.54	4	4
comp83490_c0_seq1	826	A	G	G	79.56	3	3
comp83490_c0_seq1	849	G	A	A	14.88	1	1
comp98699_c0_seq1	48	T	C	C	35.63	2	2
comp98699_c0_seq1	57	G	C	C	35.63	2	2
comp98699_c0_seq1	73	C	T	T	35.63	2	2
comp98699_c0_seq1	84	A	G	G	35.63	2	2
comp98699_c0_seq1	398	C	A	M	16.03	10	3
comp98699_c0_seq1	403	C	T	Y	54.63	12	4
comp98699_c0_seq1	412	C	T	Y	10.33	12	3
comp98627_c0_seq1	216	T	G	K	604.93	28	17
comp98627_c0_seq1	384	T	A	W	410.69	40	15
comp98627_c0_seq1	508	T	C	Y	379.99	26	13
comp89962_c1_seq1	93	G	T	T	168.44	8	8
comp74941_c0_seq1	42	C	A	A	14.88	1	1
comp74941_c0_seq1	139	T	G	G	146.5	6	6
comp74941_c0_seq1	333	T	C	Y	35.9	7	2
comp57363_c0_seq1	585	T	C	C	102.19	4	4
comp90837_c0_seq1	2511	T	G	K	58.43	12	4
comp90837_c0_seq1	2512	T	G	K	28.01	11	3
comp98050_c0_seq1	764	G	A	R	24.85	4	2
comp98050_c0_seq1	770	A	G	R	24.85	4	2
comp98050_c0_seq1	778	T	C	Y	21.86	5	2
comp98050_c0_seq1	779	A	T	W	21.86	5	2
comp98050_c0_seq1	788	C	T	Y	24.85	4	2
comp98050_c0_seq1	795	C	A	M	24.85	4	2
comp98050_c0_seq1	799	A	T	W	18.88	6	2
comp98050_c0_seq1	806	C	T	Y	18.88	6	2
comp98050_c0_seq1	815	C	T	Y	18.88	6	2
comp98050_c0_seq1	819	T	C	Y	18.88	6	2
comp98050_c0_seq1	842	C	G	S	55.82	8	3
comp98050_c0_seq1	872	A	G	R	55.82	7	3
comp98050_c0_seq1	902	A	G	R	96.24	10	4
comp98050_c0_seq1	905	A	T	W	96.24	10	4
comp98050_c0_seq1	915	T	C	Y	13.02	8	2
comp98050_c0_seq1	916	G	A	R	13.02	8	2
comp98050_c0_seq1	920	T	C	Y	13.02	8	2
comp98050_c0_seq1	930	A	G	R	15.92	7	2
comp98050_c0_seq1	934	T	G	K	15.92	7	2
comp98050_c0_seq1	1350	G	A	A	224.29	8	8
comp107500_c0_seq1	1867	A	G	R	32.37	10	2
comp62181_c0_seq1	803	G	T	K	82.69	25	4
comp62181_c0_seq1	804	T	G	K	40.93	24	3
comp62181_c0_seq1	891	T	G	K	394.6	28	12
comp62181_c0_seq1	893	A	C	M	550.17	31	16
comp62181_c0_seq1	894	C	T	Y	717.02	35	20
comp100470_c0_seq1	686	T	G	K	323.68	12	10
comp100470_c0_seq1	692	A	G	R	333.68	11	10
comp95975_c0_seq1	156	A	G	G	424.12	13	13
comp95975_c0_seq1	160	A	G	G	424.72	13	13
comp95975_c0_seq1	163	T	A	A	458.19	15	15
comp77260_c0_seq1	485	A	C	C	10.43	1	1
comp92416_c0_seq1	439	G	T	K	89.14	5	3
comp92416_c0_seq1	453	G	A	R	92.17	4	3
comp92416_c0_seq1	456	G	A	R	92.17	4	3
comp92416_c0_seq1	473	T	C	Y	129.18	5	4
comp103857_c0_seq1	311	T	C	Y	144.62	110	10
comp25570_c0_seq1	1	C	T	T	14.88	1	1
comp25570_c0_seq1	30	A	G	R	176.1	199	18
comp25570_c0_seq1	31	A	G	R	3784.2	199	98
comp25570_c0_seq1	32	G	A	R	2588.25	200	72
comp25570_c0_seq1	629	T	A	W	26.36	11	2
comp25570_c0_seq1	653	T	A	A	14.88	1	1
comp25570_c0_seq1	654	T	A	A	14.88	1	1
comp25311_c0_seq1	2095	G	A	A	14.88	1	1
comp92013_c0_seq1	150	T	A	W	1872.86	113	56
comp92013_c0_seq1	1831	A	C	M	85.6	100	15
comp92013_c0_seq1	1834	A	T	W	97.64	96	15
comp92013_c0_seq1	1836	T	C	Y	103.66	94	15
comp92013_c0_seq1	1843	G	A	R	131.7	103	17
comp92013_c0_seq1	1852	A	G	R	101.57	101	16
comp92013_c0_seq1	1858	G	A	R	48.83	96	13
comp92013_c0_seq1	1861	C	G	S	48.83	97	13
comp92013_c0_seq1	1863	A	G	R	90.55	98	14
comp92013_c0_seq1	1882	G	A	R	244.64	96	20
comp92013_c0_seq1	1884	T	G	K	247.65	95	20
comp92013_c0_seq1	1903	A	T	W	643.52	111	36
comp92013_c0_seq1	1909	G	A	R	771.86	122	41
comp92013_c0_seq1	1919	T	G	K	710.39	113	38
comp92013_c0_seq1	1920	G	A	R	710.39	113	38
comp92013_c0_seq1	1926	T	A	W	737.81	116	39
comp92013_c0_seq1	1930	A	T	W	752.86	108	39
comp92013_c0_seq1	1950	C	T	Y	1186.41	137	58
comp92013_c0_seq1	1954	G	A	R	1192.43	132	58
comp92013_c0_seq1	1963	T	C	Y	1146.33	132	56
comp92013_c0_seq1	1973	T	G	K	1019.49	125	50
comp92013_c0_seq1	1981	C	T	Y	707.34	105	35
comp92013_c0_seq1	1984	A	G	R	772.42	105	38
comp92013_c0_seq1	1990	A	T	W	1139.81	126	56
comp92013_c0_seq1	2002	T	G	K	2437.59	176	109
comp92013_c0_seq1	2008	G	A	R	2617.94	182	115
comp92013_c0_seq1	2048	C	T	Y	1521.12	200	51
comp92013_c0_seq1	2074	A	G	R	3404.24	197	146
comp92013_c0_seq1	2080	A	T	W	2977.37	172	126
comp92013_c0_seq1	2122	C	T	Y	1911.79	160	87
comp92013_c0_seq1	2131	G	T	K	1078.25	131	59
comp92013_c0_seq1	2149	G	A	R	1007.82	140	56
comp92013_c0_seq1	2155	A	T	W	1338.02	154	71
comp92013_c0_seq1	2161	G	A	R	1277.47	149	69
comp92013_c0_seq1	2179	A	G	R	869.82	128	50
comp92013_c0_seq1	2182	T	C	Y	864.42	138	51
comp92013_c0_seq1	2197	C	T	Y	625.79	120	39
comp92013_c0_seq1	2209	C	T	Y	349.17	92	24
comp92013_c0_seq1	2212	A	G	R	346.16	93	24
comp92013_c0_seq1	2215	A	T	W	352.19	91	24
comp92013_c0_seq1	2218	G	C	S	355.2	91	24
comp92013_c0_seq1	2221	A	T	W	355.2	92	24
comp92013_c0_seq1	2227	A	G	R	462.14	97	28
comp92013_c0_seq1	2233	A	G	R	474.18	89	28
comp92013_c0_seq1	2239	A	G	R	202.44	72	15
comp92013_c0_seq1	2272	A	T	W	58.1	66	9
comp92013_c0_seq1	2767	G	A	R	42.44	60	8
comp92013_c0_seq1	2776	G	A	R	389.49	80	20
comp92013_c0_seq1	2784	A	G	R	447.63	81	22
comp92013_c0_seq1	2794	A	G	R	496.11	75	23
comp92013_c0_seq1	2799	A	G	R	459.67	77	22
comp92013_c0_seq1	2803	A	G	R	459.67	79	22
comp92013_c0_seq1	2806	A	G	R	459.67	82	22
comp92013_c0_seq1	2809	C	T	Y	459.67	81	22
[truncated: 170,214 more rows]

## Sheet: CS25°C
contig/scafford ID	snp_position	ref_base	alt_base	genotype	snp_quality	tot_depth	alt_depth
comp101335_c2_seq1	83	G	A	R	74.97	6	3
comp101335_c2_seq1	460	C	A	M	191.5	17	6
comp101335_c2_seq1	592	C	G	S	163.59	11	6
comp103320_c0_seq1	6	C	T	Y	68.32	34	6
comp103320_c0_seq1	25	A	C	C	1753.16	48	48
comp103320_c0_seq1	43	G	T	K	1065.34	74	36
comp103320_c0_seq1	46	T	C	Y	593.52	74	21
comp103320_c0_seq1	79	T	A	W	654.35	92	27
comp103320_c0_seq1	95	G	A	R	513.34	97	24
comp103320_c0_seq1	136	A	G	R	310.4	70	15
comp103320_c0_seq1	137	T	G	K	785.18	71	27
comp103320_c0_seq1	171	C	T	Y	787.22	75	29
comp103320_c0_seq1	172	T	C	Y	787.23	75	29
comp103320_c0_seq1	173	A	G	R	1377.6	75	46
comp103320_c0_seq1	185	C	T	Y	244.37	74	14
comp103320_c0_seq1	190	C	T	Y	213.62	75	13
comp103320_c0_seq1	199	C	T	Y	1321.65	68	43
comp103320_c0_seq1	221	A	T	W	1189.76	78	38
comp103320_c0_seq1	241	T	A	W	149.1	65	9
comp103320_c0_seq1	242	T	A	W	149.1	65	9
comp103320_c0_seq1	289	C	T	Y	542.08	77	21
comp103320_c0_seq1	299	C	T	Y	184.21	70	13
comp103320_c0_seq1	304	C	A	M	153.78	71	12
comp103320_c0_seq1	320	C	A	M	156.79	70	12
comp103320_c0_seq1	330	T	C	Y	405.83	69	16
comp103320_c0_seq1	359	A	C	M	185.43	62	10
comp103320_c0_seq1	377	A	G	R	54.3	51	6
comp103320_c0_seq1	384	C	T	Y	304.31	47	14
comp103320_c0_seq1	406	A	G	R	85.96	53	8
comp103320_c0_seq1	425	T	C	Y	358.57	51	17
comp103320_c0_seq1	439	A	G	R	393.09	65	18
comp103320_c0_seq1	482	A	G	R	1519.06	71	42
comp103320_c0_seq1	493	C	T	Y	1468.34	74	41
comp103320_c0_seq1	531	G	A	R	526.55	62	22
comp103320_c0_seq1	602	A	G	R	243.32	52	11
comp103320_c0_seq1	624	T	G	K	231	46	11
comp103320_c0_seq1	647	G	A	R	683.88	51	23
comp103320_c0_seq1	657	G	A	R	341.58	55	17
comp103320_c0_seq1	678	G	T	K	283.59	48	12
comp103320_c0_seq1	697	G	A	R	48.71	51	6
comp103320_c0_seq1	698	G	A	R	45.74	52	6
comp103320_c0_seq1	802	A	G	R	376.48	60	14
comp103320_c0_seq1	821	A	G	R	578.55	55	19
comp103320_c0_seq1	822	A	G	R	1014.19	54	33
comp103320_c0_seq1	841	G	A	R	281.09	64	14
comp103320_c0_seq1	871	G	A	R	371.2	62	14
comp103320_c0_seq1	906	C	A	M	546.68	59	20
comp103320_c0_seq1	927	A	C	M	544.38	55	19
comp103320_c0_seq1	929	T	C	Y	247.26	55	11
comp103320_c0_seq1	944	T	C	Y	696.1	51	23
comp103320_c0_seq1	965	G	A	R	265.35	49	11
comp103320_c0_seq1	978	A	G	R	640.43	51	23
comp103320_c0_seq1	986	C	T	Y	638.63	47	21
comp103320_c0_seq1	1006	G	A	R	552.97	42	20
comp103320_c0_seq1	1010	G	A	R	472.49	42	17
comp103320_c0_seq1	1049	A	T	W	302.24	24	11
comp103320_c0_seq1	1055	T	C	Y	461.57	23	15
comp103320_c0_seq1	1068	A	C	M	24.48	19	3
comp73458_c0_seq1	1640	T	C	Y	74.09	11	3
comp86147_c0_seq1	165	G	A	A	124.5	4	4
comp86147_c0_seq1	166	T	G	G	45.74	2	2
comp86147_c0_seq1	628	T	A	W	37.98	4	2
comp86147_c0_seq1	629	G	T	K	37.98	4	2
comp86147_c0_seq1	631	T	C	Y	124.43	5	4
comp93784_c0_seq1	1699	A	T	T	58.21	2	2
comp26906_c0_seq1	37	A	T	T	14.88	1	1
comp26906_c0_seq1	250	A	G	R	131.74	191	16
comp26906_c0_seq1	259	T	C	Y	140.42	199	17
comp26906_c0_seq1	500	T	C	Y	93.41	195	16
comp26906_c0_seq1	1122	C	A	A	14.16	1	1
comp71072_c0_seq1	362	A	G	R	81.88	6	4
comp71072_c0_seq1	373	C	A	M	48.45	6	3
comp71072_c0_seq1	374	A	G	R	48.45	6	3
comp71072_c0_seq1	375	A	G	R	48.45	6	3
comp71072_c0_seq1	382	G	A	R	21.86	5	2
comp71072_c0_seq1	385	C	G	S	18.88	6	2
comp71072_c0_seq1	389	T	A	W	18.88	6	2
comp71072_c0_seq1	392	C	T	Y	18.88	6	2
comp71072_c0_seq1	393	G	T	K	18.88	6	2
comp71072_c0_seq1	405	T	C	Y	49.24	7	3
comp71072_c0_seq1	406	G	A	R	49.24	7	3
comp71072_c0_seq1	407	A	T	W	49.24	7	3
comp71072_c0_seq1	420	A	C	M	110.1	9	5
comp71072_c0_seq1	429	A	G	R	82.68	7	4
comp71072_c0_seq1	441	G	A	R	52.25	6	3
comp71072_c0_seq1	442	A	G	R	52.25	6	3
comp96829_c0_seq1	92	A	C	C	58.21	2	2
comp96829_c0_seq1	96	T	C	C	146.42	4	4
comp96829_c0_seq1	613	G	C	C	1264.09	30	30
comp87145_c0_seq1	117	A	G	G	58.21	2	2
comp87145_c0_seq1	315	G	T	T	14.88	1	1
comp87145_c0_seq1	745	T	C	C	58.21	2	2
comp87145_c0_seq1	977	A	G	G	58.21	3	3
comp97401_c0_seq1	96	A	C	C	53.49	2	2
comp97401_c0_seq1	492	G	A	A	1343.84	36	36
comp97401_c0_seq1	751	A	G	G	1349	35	35
comp97401_c0_seq1	979	G	A	A	1129.51	29	29
comp97401_c0_seq1	1195	T	C	C	923.26	25	25
comp97401_c0_seq1	1219	C	T	T	1213.36	34	34
comp97401_c0_seq1	1243	A	G	G	1409.69	39	39
comp97401_c0_seq1	1255	G	A	A	1074.86	29	29
comp97401_c0_seq1	1256	A	T	T	1078.68	29	29
comp97401_c0_seq1	1604	G	A	A	1209.97	29	29
comp97401_c0_seq1	1656	C	G	G	991.18	28	28
comp75705_c0_seq1	196	C	T	Y	47.42	4	2
comp75705_c0_seq1	201	T	G	K	47.42	4	2
comp75705_c0_seq1	360	T	A	W	12.04	2	1
comp75705_c0_seq1	526	G	A	R	50.43	3	2
comp75705_c0_seq1	661	C	T	Y	47.42	4	2
comp75705_c0_seq1	937	T	A	W	92.19	5	4
comp75705_c0_seq1	1154	T	C	C	12.88	1	1
comp96193_c0_seq1	74	A	T	W	50.43	3	2
comp96193_c0_seq1	2099	C	T	Y	47.44	30	4
comp96193_c0_seq1	3010	A	C	C	2516.18	66	66
comp102192_c3_seq1	435	C	T	T	2211.76	70	69
comp102192_c3_seq1	460	G	T	K	27.86	3	2
comp102192_c3_seq1	469	T	A	A	622.49	24	22
comp102192_c3_seq1	478	A	G	G	622.49	24	22
comp102192_c3_seq1	522	G	A	A	100.77	4	4
comp97778_c2_seq1	223	A	G	R	26.31	6	2
comp71983_c0_seq1	613	C	T	T	46.92	2	2
comp101734_c1_seq1	152	G	A	A	90.85	3	3
comp101734_c1_seq1	242	C	T	Y	92.17	4	3
comp101734_c1_seq1	318	A	G	R	24.85	5	2
comp101734_c1_seq1	403	G	C	C	14.88	1	1
comp101734_c1_seq1	500	T	G	G	77.71	4	4
comp101734_c1_seq1	505	A	G	G	77.71	4	4
comp101734_c1_seq1	532	G	A	A	68.27	3	3
comp101734_c1_seq1	551	A	T	T	46.92	2	2
comp101734_c1_seq1	587	A	G	G	79.56	3	3
comp69633_c0_seq1	71	C	A	A	10.43	1	1
comp69633_c0_seq1	240	C	T	T	102.23	5	5
comp69633_c0_seq1	246	T	C	C	102.23	5	5
comp69633_c0_seq1	460	G	A	A	14.88	1	1
comp69633_c0_seq1	477	A	G	G	14.88	1	1
comp69633_c0_seq1	493	T	A	A	14.88	1	1
comp96924_c0_seq1	167	T	A	A	7489.4	183	183
comp96924_c0_seq1	854	A	T	T	5868.28	178	168
comp96924_c0_seq1	872	A	G	G	5794.63	175	168
comp81196_c0_seq1	27	T	C	C	42.2	2	2
comp81196_c0_seq1	34	T	C	C	42.2	2	2
comp81196_c0_seq1	36	T	A	A	42.2	2	2
comp97015_c0_seq1	119	C	T	Y	403.1	34	17
comp97015_c0_seq1	172	T	C	Y	333.13	40	13
comp97015_c0_seq1	187	C	T	Y	252.29	35	10
comp97015_c0_seq1	208	C	T	Y	328.09	48	14
comp97015_c0_seq1	211	C	T	Y	289.38	46	13
comp97015_c0_seq1	224	A	G	R	328.09	46	14
comp97015_c0_seq1	279	G	A	R	400.71	52	16
comp97015_c0_seq1	284	T	A	W	381.58	50	15
comp97015_c0_seq1	339	A	G	R	455.26	39	18
comp97015_c0_seq1	366	T	A	W	303.72	22	12
comp97015_c0_seq1	673	A	G	R	438.2	50	15
comp97015_c0_seq1	724	C	T	Y	824.01	66	27
comp97015_c0_seq1	961	C	T	Y	392.48	44	16
comp97015_c0_seq1	1348	T	C	Y	753.39	46	26
comp97015_c0_seq1	1445	T	C	Y	476.3	32	15
comp97015_c0_seq1	1469	G	A	R	264.61	26	8
comp97015_c0_seq1	1614	C	T	Y	35.38	8	2
comp97015_c0_seq1	1651	G	A	R	38.37	10	2
comp97015_c0_seq1	1797	T	G	G	14.88	1	1
comp101766_c2_seq1	142	G	T	T	218.97	7	7
comp101766_c2_seq1	210	T	G	G	363.98	12	12
comp101766_c2_seq1	218	G	A	A	285.83	10	10
comp101766_c2_seq1	262	A	G	G	230.26	7	7
comp101766_c2_seq1	283	C	G	G	112.54	4	4
comp101766_c2_seq1	302	A	G	G	46.92	2	2
comp101766_c2_seq1	340	C	G	G	35.63	2	2
comp101766_c2_seq1	353	C	T	T	35.63	2	2
comp101766_c2_seq1	355	G	A	A	35.63	2	2
comp101766_c2_seq1	357	C	A	A	35.63	2	2
comp101766_c2_seq1	375	T	C	C	35.63	2	2
comp101766_c2_seq1	449	T	C	C	14.88	1	1
comp101766_c2_seq1	535	C	T	T	212.58	8	8
comp101766_c2_seq1	537	T	C	C	212.62	8	8
comp101766_c2_seq1	575	T	C	C	167.94	5	5
comp101766_c2_seq1	600	T	C	C	78.72	3	3
comp101766_c2_seq1	607	G	A	A	78.72	3	3
comp101766_c2_seq1	616	T	C	C	78.72	3	3
comp101766_c2_seq1	640	C	T	T	78.72	3	3
comp80288_c0_seq1	2152	A	G	R	20.38	13	2
comp79394_c0_seq1	481	A	G	R	41.4	6	2
comp79394_c0_seq1	564	T	C	Y	92.24	6	5
comp98846_c0_seq1	1121	G	T	T	58.21	2	2
comp98846_c0_seq1	1249	G	C	C	46.96	3	3
comp98846_c0_seq1	1265	A	G	G	46.96	3	3
comp98846_c0_seq1	1277	G	A	A	46.92	2	2
comp98846_c0_seq1	1297	G	A	A	46.92	2	2
comp39522_c0_seq1	1244	C	A	A	14.52	1	1
comp83619_c0_seq1	27	G	C	S	31.19	13	3
comp83619_c0_seq1	39	T	A	W	55.6	16	4
comp83619_c0_seq1	66	G	C	S	80.14	31	6
comp83619_c0_seq1	100	G	A	R	53.04	40	6
comp83619_c0_seq1	104	G	T	K	53.04	41	6
comp86224_c0_seq1	284	C	T	T	46.92	2	2
comp103801_c0_seq1	599	G	T	K	110.94	8	5
comp103801_c0_seq1	600	T	C	Y	110.94	8	5
comp103801_c0_seq1	606	C	T	Y	43.52	6	3
comp103801_c0_seq1	613	T	C	Y	43.52	6	3
comp103801_c0_seq1	642	C	A	M	104.37	7	5
comp103801_c0_seq1	665	C	T	Y	104.37	7	5
comp33152_c0_seq1	267	A	G	G	14.88	1	1
comp27085_c1_seq1	596	A	T	W	1176.68	162	38
comp27085_c1_seq1	597	T	C	Y	444.89	187	23
comp27085_c1_seq1	626	A	C	M	355.41	187	21
comp27085_c1_seq1	628	A	C	M	803.55	156	29
comp27085_c1_seq1	652	A	T	W	32.55	190	14
comp27085_c1_seq1	791	A	G	R	52.57	178	14
comp27085_c1_seq1	797	T	C	Y	548.96	195	26
comp27085_c1_seq1	823	T	C	Y	313.23	198	21
comp27085_c1_seq1	889	T	C	Y	952.23	191	35
comp27085_c1_seq1	896	A	T	W	143.83	182	16
comp27085_c1_seq1	957	T	C	Y	719.22	197	30
comp27085_c1_seq1	1175	C	G	G	58.21	2	2
comp98946_c0_seq1	838	A	G	R	18.92	34	4
comp98946_c0_seq1	901	T	C	Y	553.29	22	20
comp98946_c0_seq1	903	T	C	Y	510.89	21	19
comp98946_c0_seq1	905	G	A	R	426.85	19	17
comp98946_c0_seq1	906	C	T	Y	426.85	19	17
comp98946_c0_seq1	1054	T	G	K	145.14	19	8
comp98946_c0_seq1	1061	T	C	Y	75.26	20	6
comp98946_c0_seq1	1063	A	C	M	72.25	21	6
comp98946_c0_seq1	1064	G	A	R	72.25	21	6
comp98946_c0_seq1	1122	T	C	C	621.6	24	21
comp98946_c0_seq1	1160	A	G	G	745.3	24	24
comp98946_c0_seq1	1179	C	A	A	703.37	24	24
comp98946_c0_seq1	1185	T	C	C	621.95	22	22
comp97707_c0_seq1	3	T	C	C	344.26	10	9
comp97707_c0_seq1	6	T	C	C	423.47	12	11
comp97707_c0_seq1	177	C	T	Y	98.41	110	14
comp97707_c0_seq1	189	C	T	Y	295.03	130	25
comp97707_c0_seq1	207	T	C	Y	179.97	128	22
comp97707_c0_seq1	210	G	A	R	158.9	136	22
comp97707_c0_seq1	243	A	T	W	1108.45	184	60
comp97707_c0_seq1	255	T	C	Y	1168.18	186	64
comp97707_c0_seq1	273	T	A	W	1261.03	168	65
comp97707_c0_seq1	318	G	C	S	419.27	141	37
comp97707_c0_seq1	321	T	C	Y	301.98	137	23
comp97707_c0_seq1	328	G	A	R	680.65	118	38
comp97707_c0_seq1	333	A	G	R	183.75	111	16
comp97707_c0_seq1	334	A	C	M	463.47	106	27
comp97707_c0_seq1	336	A	C	M	237.49	94	16
comp97707_c0_seq1	351	G	C	S	728.94	101	34
comp97707_c0_seq1	354	C	T	Y	1079.04	115	51
comp97707_c0_seq1	363	A	G	R	993.38	114	42
comp97707_c0_seq1	393	A	G	R	1282.92	110	48
comp97707_c0_seq1	402	T	C	Y	1974.62	110	68
comp97707_c0_seq1	411	C	T	Y	790.01	109	36
comp97707_c0_seq1	414	A	C	M	566.62	100	27
comp97707_c0_seq1	420	C	T	Y	772.4	118	36
comp97707_c0_seq1	426	A	G	R	605.48	113	28
comp97707_c0_seq1	444	A	G	R	496.35	129	26
comp97707_c0_seq1	462	T	A	W	198.14	117	16
comp97707_c0_seq1	465	T	C	Y	219.06	109	16
comp97707_c0_seq1	477	A	G	R	91.42	102	12
comp97707_c0_seq1	492	G	T	K	201.57	106	16
comp97707_c0_seq1	510	C	T	Y	58.17	101	11
comp97707_c0_seq1	513	C	T	Y	58.17	101	11
comp97707_c0_seq1	891	A	C	M	661.64	159	34
comp97707_c0_seq1	897	C	T	Y	1012.32	183	47
comp97707_c0_seq1	909	T	G	K	1347.54	188	58
comp97707_c0_seq1	915	G	A	R	1315.84	190	57
comp97707_c0_seq1	918	G	A	R	1316.26	176	56
comp97707_c0_seq1	921	C	T	Y	1331.31	176	56
comp97707_c0_seq1	933	T	C	Y	2115.75	195	81
comp97707_c0_seq1	942	T	C	Y	1951.59	198	76
comp97707_c0_seq1	948	T	C	Y	2560.06	199	95
comp97707_c0_seq1	954	T	A	W	2660.36	196	98
comp97707_c0_seq1	972	C	T	Y	3116.45	194	112
comp97707_c0_seq1	978	A	G	R	2945.82	188	106
comp97707_c0_seq1	984	G	A	R	3500.98	193	122
comp97707_c0_seq1	990	A	T	W	2999.35	160	105
comp97707_c0_seq1	993	A	T	W	3087.62	164	108
comp97707_c0_seq1	996	C	A	M	3202.92	167	113
comp97707_c0_seq1	1005	C	T	Y	4463.79	184	149
comp97707_c0_seq1	1008	C	G	S	4999.47	200	165
comp97707_c0_seq1	1011	C	T	Y	5136.76	200	167
comp97707_c0_seq1	1794	T	A	W	65.06	13	3
comp97707_c0_seq1	1795	G	T	K	23.36	12	2
comp97707_c0_seq1	1814	T	A	A	14.88	1	1
comp97707_c0_seq1	1815	T	A	A	14.88	1	1
comp98387_c4_seq1	278	A	G	G	35.63	2	2
comp98387_c4_seq1	326	T	C	C	35.63	2	2
comp98387_c4_seq1	332	T	C	C	68.27	3	3
comp98387_c4_seq1	340	A	G	G	68.27	3	3
comp98387_c4_seq1	356	T	G	G	101.24	4	4
comp98387_c4_seq1	363	C	T	T	101.24	4	4
comp98387_c4_seq1	414	T	G	G	68.27	3	3
comp98387_c4_seq1	448	G	A	A	79.56	3	3
comp98387_c4_seq1	450	C	T	T	79.56	3	3
comp98387_c4_seq1	465	G	A	A	79.56	3	3
comp98387_c4_seq1	512	A	G	G	157.06	6	6
comp98387_c4_seq1	529	T	G	G	190.36	7	7
comp98387_c4_seq1	536	G	A	A	223.73	8	8
comp98387_c4_seq1	624	A	G	G	42.2	2	2
comp231073_c0_seq1	814	A	T	T	14.88	1	1
comp73990_c0_seq1	119	A	C	C	14.88	1	1
comp73990_c0_seq1	120	T	A,C	M	24.49	2	1
comp63635_c0_seq1	370	C	T	T	14.92	2	2
comp73030_c0_seq1	1082	A	G	G	58.26	3	3
comp89576_c0_seq1	444	T	G	G	14.88	1	1
comp75621_c1_seq1	531	T	C	C	146.5	6	6
comp75621_c1_seq1	538	A	T	T	102.23	5	5
comp100708_c1_seq1	290	T	C	Y	32.37	9	2
comp100708_c1_seq1	330	T	C	Y	26.36	11	2
comp9339_c0_seq1	536	G	T	T	10.43	1	1
comp91832_c0_seq1	717	A	G	G	14.92	2	2
comp91832_c0_seq1	736	C	T	T	14.92	2	2
comp91832_c0_seq1	752	C	T	T	14.88	1	1
comp91832_c0_seq1	1187	T	C	C	23.88	2	2
comp91832_c0_seq1	1191	T	C	C	23.88	2	2
comp77285_c0_seq1	148	G	A	A	12.36	2	2
comp77285_c0_seq1	149	A	G	G	12.36	2	2
comp77285_c0_seq1	161	G	A	A	12.36	2	2
comp77285_c0_seq1	288	T	G	G	12.36	2	2
comp77285_c0_seq1	291	G	T	T	12.36	2	2
comp77285_c0_seq1	295	T	C	C	12.36	2	2
comp77285_c0_seq1	298	A	T	T	12.36	2	2
comp77285_c0_seq1	304	A	T	T	12.36	2	2
comp77285_c0_seq1	315	T	G	G	12.36	2	2
comp93938_c0_seq1	686	T	G	K	18.87	7	2
comp92651_c0_seq1	236	C	A	A	28.01	2	2
comp92651_c0_seq1	237	C	G	G	28.01	2	2
comp92651_c0_seq1	238	A	T	T	28.01	2	2
comp92651_c0_seq1	240	A	C	C	28.01	2	2
comp92651_c0_seq1	390	A	T	T	14.88	1	1
comp92651_c0_seq1	565	A	T	W	38.37	7	2
comp791_c0_seq1	375	T	C	C	14.88	1	1
comp97014_c0_seq1	346	C	T	Y	24.66	11	2
comp97014_c0_seq1	416	T	C	C	170.2	6	6
comp97014_c0_seq1	607	A	G	G	35.63	2	2
comp97014_c0_seq1	629	T	C	C	68.27	3	3
comp97014_c0_seq1	690	G	A	A	35.63	2	2
comp97014_c0_seq1	695	T	C	C	35.63	2	2
comp97014_c0_seq1	718	T	G	G	35.63	2	2
comp81145_c0_seq1	1697	T	C	Y	14.47	16	2
comp81145_c0_seq1	1841	T	C	Y	26.32	11	2
comp94895_c0_seq1	19	G	A	R	105.96	8	4
comp94895_c0_seq1	21	T	G	K	10	10	2
comp94895_c0_seq1	22	A	C	M	310.98	14	10
comp94895_c0_seq1	41	A	G	R	1401.94	57	44
comp94895_c0_seq1	69	G	A	R	291.94	126	19
comp94895_c0_seq1	104	C	T	Y	558.08	147	27
comp94895_c0_seq1	122	C	T	Y	803.41	130	31
comp94895_c0_seq1	150	A	C	M	110.66	96	12
comp94895_c0_seq1	170	A	T	W	1297.98	80	47
comp94895_c0_seq1	188	A	G	R	1465.15	79	52
comp94895_c0_seq1	204	G	A	R	1039.19	64	38
comp94895_c0_seq1	450	A	G	R	68.72	38	5
comp94895_c0_seq1	521	C	A	M	60.43	36	5
comp94895_c0_seq1	688	T	C	Y	132.54	49	7
comp94895_c0_seq1	690	A	G	R	362.62	59	13
comp94895_c0_seq1	768	G	A	R	1420.53	199	51
comp94895_c0_seq1	784	C	T	Y	1167.12	193	43
comp94895_c0_seq1	808	G	A	R	1335.99	198	50
comp94895_c0_seq1	827	C	T	Y	1262.33	200	46
comp94895_c0_seq1	877	C	G	S	1033.84	199	39
comp94895_c0_seq1	919	G	A	R	687.36	179	29
comp94895_c0_seq1	941	C	T	Y	934.88	199	36
comp94895_c0_seq1	986	C	A	M	885.23	176	32
comp94895_c0_seq1	1011	C	T	T	6060.68	152	152
comp94895_c0_seq1	1027	C	G	S	713.6	138	30
comp94895_c0_seq1	1134	G	A	R	1004.39	63	34
comp94895_c0_seq1	1139	C	T	Y	1013.42	60	34
comp94895_c0_seq1	1170	C	T	Y	137.34	33	6
comp62883_c0_seq1	504	G	T	T	14.88	1	1
comp62883_c0_seq1	509	A	C	C	14.88	1	1
comp92872_c4_seq1	151	A	G	R	14.43	16	2
comp92872_c4_seq1	194	A	C	C	679.58	19	19
comp92872_c4_seq1	388	C	T	T	801.48	20	20
comp94654_c0_seq1	1703	A	G	G	6976.23	179	179
comp94654_c0_seq1	1736	A	G	G	6846.43	189	189
comp94654_c0_seq1	1757	A	G	G	7172.53	175	175
comp94654_c0_seq1	2174	G	C	C	5028.23	130	130
comp94654_c0_seq1	2547	G	A	A	4602.26	124	124
comp94654_c0_seq1	2654	A	G	G	5030.57	131	131
comp94654_c0_seq1	2914	C	G	G	3605.38	90	90
comp94654_c0_seq1	3195	G	A	R	75.82	68	6
comp94654_c0_seq1	3290	G	A	A	58.26	3	3
comp94557_c1_seq1	259	A	T	T	10.43	1	1
comp61695_c0_seq1	128	G	A	A	14.88	1	1
comp61695_c0_seq1	173	G	C	C	14.88	1	1
comp73517_c0_seq1	128	G	A	R	20.37	13	2
comp74012_c0_seq1	114	A	G	R	37.27	190	19
comp74012_c0_seq1	177	T	C	Y	46.35	164	18
comp74012_c0_seq1	186	G	C	S	185.8	178	27
comp74012_c0_seq1	213	C	G	S	744.17	200	47
comp74012_c0_seq1	237	T	G	K	996.03	200	55
comp74012_c0_seq1	255	T	A	W	975.43	200	54
comp74012_c0_seq1	291	T	C	Y	791.07	195	49
comp74012_c0_seq1	309	T	C	Y	50.84	185	23
comp74012_c0_seq1	324	C	T	Y	144.54	200	26
comp74012_c0_seq1	327	C	T	Y	73.74	200	23
comp74012_c0_seq1	330	T	C	Y	43.32	200	22
comp97238_c3_seq1	894	A	G	R	35.38	9	2
comp25993_c0_seq1	217	A	T	W	44.41	5	2
comp25993_c0_seq1	218	C	T	Y	41.4	6	2
comp95641_c0_seq1	123	T	C	Y	158.86	13	6
comp95641_c0_seq1	156	T	C	Y	166.6	11	6
comp95641_c0_seq1	163	G	A	R	163.54	11	5
comp95641_c0_seq1	946	C	T	Y	69.58	4	3
comp101102_c0_seq1	1333	T	A	A	14.88	1	1
comp101102_c0_seq1	1670	A	C	C	12.49	1	1
comp101102_c0_seq1	1683	A	G	G	12.49	1	1
comp93634_c0_seq1	204	C	A	A	208.19	6	6
comp93634_c0_seq1	219	A	T	T	58.21	2	2
comp93634_c0_seq1	263	G	C	C	168.31	5	5
comp93634_c0_seq1	275	C	T	T	212.91	6	6
comp93634_c0_seq1	359	T	A	A	436.56	15	15
comp93634_c0_seq1	372	A	G	G	436.59	15	15
comp93634_c0_seq1	438	G	A	A	79.56	3	3
comp93634_c0_seq1	468	A	G	G	35.63	2	2
comp449941_c0_seq1	371	T	G	G	14.88	1	1
comp102558_c0_seq1	376	C	A	A	10.43	1	1
comp102558_c0_seq1	377	C	G	G	10.43	1	1
comp102558_c0_seq1	779	G	A	A	14.88	1	1
comp102558_c0_seq1	984	C	T	T	14.88	1	1
comp102558_c0_seq1	994	G	A	A	14.88	1	1
comp102558_c0_seq1	1009	C	A	A	14.88	1	1
comp102558_c0_seq1	1178	G	A	A	14.84	1	1
comp102558_c0_seq1	1181	A	T	T	14.88	1	1
comp102558_c0_seq1	1218	C	T	T	14.88	1	1
comp102558_c0_seq1	1230	A	T	T	14.88	1	1
comp94975_c0_seq1	211	A	G	R	39.14	3	2
comp94975_c0_seq1	266	A	G	R	27.86	3	2
comp94975_c0_seq1	270	A	G	R	24.85	4	2
comp94975_c0_seq1	274	T	C	Y	24.85	4	2
comp94975_c0_seq1	282	T	A	W	85.69	6	4
comp94975_c0_seq1	285	T	C	Y	85.69	6	4
comp94975_c0_seq1	294	C	T	Y	85.69	6	4
comp94975_c0_seq1	330	T	A	W	85.69	7	4
comp94975_c0_seq1	389	T	G	K	24.85	4	2
comp94975_c0_seq1	549	T	C	C	10.43	1	1
comp94975_c0_seq1	553	A	T	T	10.43	1	1
comp102507_c0_seq1	223	C	T	T	1979.44	59	57
comp102507_c0_seq1	297	A	C	C	3982.12	121	121
comp102507_c0_seq1	310	T	C	C	4116.84	136	136
comp102507_c0_seq1	465	G	A	A	6197.56	161	160
comp102507_c0_seq1	1122	A	G	R	102.86	98	11
comp102507_c0_seq1	1125	C	T	Y	117.44	94	12
comp102507_c0_seq1	1130	C	T	Y	135.04	88	12
comp102507_c0_seq1	1154	C	A	M	119.74	96	12
comp102507_c0_seq1	1181	T	A	W	91.85	23	5
comp102507_c0_seq1	1293	A	C	M	1467.17	67	47
comp102507_c0_seq1	1299	C	T	Y	1968.28	82	63
comp102507_c0_seq1	1321	G	A	R	2431.25	96	75
comp102507_c0_seq1	1367	T	G	K	592.99	115	25
comp102507_c0_seq1	1440	C	G	S	454.09	98	19
comp102507_c0_seq1	1450	A	C	M	424.7	93	18
comp102507_c0_seq1	1779	A	G	R	398.3	73	17
comp102507_c0_seq1	1819	G	A	R	445.46	87	20
comp102507_c0_seq1	1827	T	A	W	365.54	90	19
comp102507_c0_seq1	1847	A	G	R	186.59	78	13
comp102507_c0_seq1	1849	C	T	Y	214	84	14
comp102507_c0_seq1	1862	C	T	Y	212.5	92	14
comp102507_c0_seq1	1925	G	A	R	420.02	95	20
comp102507_c0_seq1	1939	A	T	W	491.87	101	22
comp102507_c0_seq1	1971	G	A	R	457.2	102	20
comp102507_c0_seq1	1975	A	G	R	438.77	94	18
comp102507_c0_seq1	2033	G	A	R	231.5	99	16
comp102507_c0_seq1	2034	G	A	R	231.5	99	16
comp102507_c0_seq1	2054	G	A	R	176.59	84	12
comp102507_c0_seq1	2071	T	C	Y	237.74	79	14
comp102507_c0_seq1	2109	C	T	Y	32.39	36	5
comp102507_c0_seq1	2124	G	C	C	146.5	6	6
comp102507_c0_seq1	2289	G	C	S	18.69	14	2
comp102507_c0_seq1	2292	G	A	R	68.13	15	3
comp102507_c0_seq1	2303	A	T	W	181.27	50	12
comp102507_c0_seq1	2318	G	A	R	215.24	55	12
comp102507_c0_seq1	2322	T	C	Y	212.23	57	12
comp102507_c0_seq1	2334	C	T	Y	1647.79	66	51
comp102507_c0_seq1	2359	T	C	Y	194.74	73	13
comp102507_c0_seq1	2367	G	A	R	70.93	71	9
comp102507_c0_seq1	2380	T	G	K	73.87	82	9
comp102507_c0_seq1	2393	G	T	K	277.86	85	15
comp102507_c0_seq1	2415	G	A	R	269.17	85	16
comp102507_c0_seq1	2434	C	T	Y	282.92	90	17
comp102507_c0_seq1	2446	G	A	R	440.76	93	21
comp102507_c0_seq1	2520	G	T	K	565.76	113	27
comp102507_c0_seq1	2652	C	T	Y	254.3	109	16
comp102507_c0_seq1	2673	G	T	K	336.01	103	19
comp102507_c0_seq1	2692	A	G	R	248.46	91	15
comp102507_c0_seq1	2715	G	A	R	163.15	74	12
comp102507_c0_seq1	2733	A	T	W	245.4	82	15
comp102507_c0_seq1	2745	A	T	W	1991.54	72	58
comp102507_c0_seq1	2748	C	T	Y	120.96	69	10
comp102507_c0_seq1	2762	G	T	K	2231.63	68	59
comp102507_c0_seq1	3052	G	A	A	2314.45	61	61
comp102507_c0_seq1	3113	C	T	T	2121.23	58	58
comp102507_c0_seq1	3347	C	T	T	2370.32	66	66
comp102507_c0_seq1	3575	A	G	G	1652.16	42	42
comp83906_c0_seq1	1	A	G	G	14.88	1	1
comp83906_c0_seq1	125	C	T	T	146.42	4	4
comp83906_c0_seq1	1096	A	T	W	33.68	7	2
comp101656_c1_seq1	654	A	G	G	146.42	4	4
comp99124_c0_seq1	1002	T	C	C	1946.03	49	49
comp99124_c0_seq1	1042	G	A	A	1866.92	49	49
comp99124_c0_seq1	1053	G	T	T	1743.72	48	47
comp99124_c0_seq1	1069	A	G	G	1520.85	43	43
comp99124_c0_seq1	1129	T	C	C	1192.46	31	31
comp99124_c0_seq1	1254	A	G	R	16.31	10	2
comp99124_c0_seq1	1258	G	A	A	394.9	10	10
comp99124_c0_seq1	1263	T	G	K	16.3	10	2
comp99124_c0_seq1	1303	G	A	A	431.62	12	12
comp99124_c0_seq1	1372	G	A	A	1007.27	31	31
comp99124_c0_seq1	1381	G	C	C	996.02	32	32
comp99124_c0_seq1	1387	A	G	G	1034.19	34	34
comp99124_c0_seq1	1462	A	G	G	1400.65	36	36
comp99124_c0_seq1	1511	G	A	A	1344.24	37	37
comp99124_c0_seq1	1521	G	A	A	1244.15	39	39
comp99124_c0_seq1	1524	T	A	A	1288.88	40	40
comp99124_c0_seq1	1747	T	C	C	14.88	1	1
comp99124_c0_seq1	1754	A	G	G	14.88	1	1
comp639070_c0_seq1	262	C	T	T	102.15	3	3
comp639070_c0_seq1	292	G	A	A	90.85	3	3
comp639070_c0_seq1	295	G	T	T	90.85	3	3
comp639070_c0_seq1	307	T	G	G	90.85	3	3
comp639070_c0_seq1	473	A	G	G	86.13	3	3
comp101275_c1_seq1	398	G	A	A	35.63	2	2
comp101275_c1_seq1	405	G	A	A	35.63	2	2
comp101275_c1_seq1	407	C	T	T	35.63	2	2
comp101275_c1_seq1	439	T	A	A	35.63	2	2
comp101275_c1_seq1	444	T	C	C	35.63	2	2
comp101275_c1_seq1	445	G	A	A	35.63	2	2
comp101275_c1_seq1	472	T	C	C	35.63	2	2
comp80072_c0_seq1	27	A	T	T	23.88	2	2
comp80072_c0_seq1	55	T	C	C	185.29	6	6
comp80072_c0_seq1	69	C	T	T	185.27	6	6
comp80072_c0_seq1	104	T	C	C	151.99	5	5
comp80072_c0_seq1	112	A	G	G	130.56	4	4
comp80072_c0_seq1	209	T	G	G	101.41	3	3
comp80072_c0_seq1	239	T	A	A	178.86	5	5
comp80072_c0_seq1	262	A	T	T	178.86	5	5
comp80072_c0_seq1	282	G	A	A	178.86	5	5
comp80072_c0_seq1	550	G	A	A	58.21	2	2
comp80072_c0_seq1	623	G	A	A	90.9	4	4
comp80313_c1_seq1	352	C	T	Y	36.13	4	2
comp80313_c1_seq1	602	T	C	C	53.49	2	2
comp56666_c0_seq1	234	A	G	R	103.05	56	9
comp82368_c0_seq1	233	T	C	Y	12.83	15	2
comp88853_c0_seq1	266	G	T	K	50.43	3	2
comp88853_c0_seq1	311	G	C	C	58.21	2	2
comp88853_c0_seq1	387	C	T	T	14.88	1	1
comp88853_c0_seq1	389	T	A	A	14.88	1	1
comp88853_c0_seq1	424	C	T	T	14.88	1	1
comp92196_c0_seq1	308	T	C	C	14.88	1	1
comp92196_c0_seq1	437	C	T	T	14.88	1	1
comp102331_c3_seq1	256	A	T	T	31.82	2	2
comp102331_c3_seq1	259	C	T	T	31.82	2	2
comp102331_c3_seq1	268	C	T	T	31.82	2	2
comp102331_c3_seq1	273	C	T	T	31.82	2	2
comp102331_c3_seq1	835	A	G	G	14.84	1	1
comp102331_c3_seq1	842	T	C	C	14.88	1	1
comp96900_c1_seq1	203	A	C	M	16.45	11	2
comp69866_c0_seq1	394	A	C	C	58.21	2	2
comp23732_c0_seq1	60	T	A	A	14.88	1	1
comp23732_c0_seq1	99	A	G	G	135.12	4	4
comp23732_c0_seq1	111	T	C	C	135.17	5	5
comp23732_c0_seq1	167	A	C	C	135.17	5	5
comp91192_c0_seq1	7	C	G	G	58.21	2	2
comp91192_c0_seq1	94	G	C	C	3115.73	81	81
comp91192_c0_seq1	475	C	T	T	8134	194	194
comp91192_c0_seq1	1404	A	C	M	23.36	13	2
comp91192_c0_seq1	1448	T	C	C	46.92	2	2
comp77273_c2_seq1	169	C	T	T	102.19	4	4
comp77273_c2_seq1	580	C	G	G	102.19	4	4
comp67110_c0_seq1	200	C	T	T	102.15	3	3
comp102049_c0_seq1	31	A	G	G	53.49	2	2
comp102049_c0_seq1	69	A	G	G	92.75	4	4
comp102049_c0_seq1	89	T	C	C	125.72	5	5
comp102049_c0_seq1	231	A	G	G	112.51	4	4
comp102049_c0_seq1	232	C	A	A	112.54	4	4
comp102049_c0_seq1	246	G	A	A	145.72	5	5
comp102049_c0_seq1	256	A	G	G	112.58	5	5
comp102049_c0_seq1	283	T	A	A	196.89	6	6
comp102049_c0_seq1	364	T	A	A	79.6	4	4
comp102049_c0_seq1	365	C	T	T	79.6	4	4
comp102049_c0_seq1	385	C	T	T	145.72	5	5
comp102049_c0_seq1	432	A	C	C	35.63	2	2
comp39419_c0_seq1	269	A	T	T	14.88	1	1
comp39419_c0_seq1	277	C	A	A	14.88	1	1
comp39419_c0_seq1	419	G	A	A	14.92	2	2
comp39419_c0_seq1	436	A	G	G	14.92	2	2
comp39419_c0_seq1	448	T	C	C	58.26	3	3
comp94521_c0_seq1	38	C	A	A	10.43	1	1
comp94521_c0_seq1	39	T	A	A	10.43	1	1
comp94521_c0_seq1	40	C	T	T	10.43	1	1
comp92586_c0_seq1	1674	G	T	T	14.88	1	1
comp103582_c1_seq1	603	T	C	C	10.43	1	1
comp103582_c1_seq1	823	A	G	G	301.34	10	10
comp103582_c1_seq1	837	G	T	T	334.77	11	11
comp59985_c0_seq1	237	A	G	G	11.01	1	1
comp97897_c1_seq1	563	T	C	Y	30.4	14	3
comp97897_c1_seq1	570	T	A	W	102.72	21	5
comp97897_c1_seq1	598	G	A	R	234.08	44	10
comp97897_c1_seq1	639	G	A	R	55.78	48	7
comp97897_c1_seq1	654	T	C	Y	190.73	51	11
comp97897_c1_seq1	655	A	G	R	214.81	43	11
comp97897_c1_seq1	672	T	C	Y	144.31	40	8
comp97897_c1_seq1	746	G	A	R	327.84	23	12
comp97897_c1_seq1	771	C	T	Y	92.66	24	6
comp97897_c1_seq1	779	C	T	Y	25.8	24	4
comp97897_c1_seq1	796	A	G	R	10.79	17	3
comp97897_c1_seq1	843	G	A	R	43.84	17	4
comp97897_c1_seq1	855	A	G	R	40.21	11	3
comp97897_c1_seq1	863	G	T	K	70.64	12	4
comp97897_c1_seq1	877	T	C	Y	125.76	11	6
comp97897_c1_seq1	895	G	A	R	153.18	13	7
comp97897_c1_seq1	897	C	T	Y	153.18	13	7
comp97897_c1_seq1	900	G	A	R	150.17	14	7
comp97897_c1_seq1	902	A	G	R	150.17	14	7
comp97897_c1_seq1	918	A	G	R	138.13	18	7
comp97897_c1_seq1	924	T	C	Y	55.59	16	4
comp97897_c1_seq1	930	G	T	K	43.84	16	4
comp97897_c1_seq1	931	T	C	Y	43.84	16	4
comp97897_c1_seq1	935	C	T	Y	77.28	16	5
comp97897_c1_seq1	965	T	C	Y	399.67	19	13
comp97897_c1_seq1	967	G	A	R	399.67	19	13
comp97897_c1_seq1	972	T	A	W	357.95	18	12
comp97897_c1_seq1	1009	G	C	S	152.93	14	7
comp97897_c1_seq1	1019	A	T	W	137.26	12	6
comp97897_c1_seq1	1037	T	C	Y	112.86	9	5
comp71389_c1_seq1	12	T	G	G	14.85	1	1
comp71389_c1_seq1	14	T	C	C	14.88	1	1
comp71389_c1_seq1	461	A	C	M	41.39	6	2
comp92724_c0_seq1	1109	G	A	R	22.71	3	2
comp92724_c0_seq1	1112	G	T	K	16.49	3	2
comp85249_c0_seq1	569	G	C	C	7535.38	187	187
comp85249_c0_seq1	817	A	G	G	1911.19	54	54
comp85249_c0_seq1	864	T	C	Y	359.64	35	11
comp85249_c0_seq1	866	T	G	K	772.2	35	24
comp85249_c0_seq1	868	A	G	R	356.49	36	11
comp85249_c0_seq1	880	C	G	G	502.43	16	16
comp85249_c0_seq1	900	T	C	C	123.87	5	5
comp98126_c3_seq1	142	G	A	A	484.9	17	17
comp98126_c3_seq1	307	T	A	A	146.46	5	5
comp98126_c3_seq1	487	T	C	C	414.28	10	10
comp98126_c3_seq1	775	A	C	C	492.44	13	13
comp98126_c3_seq1	836	A	G	G	349.03	11	10
comp98126_c3_seq1	864	T	C	Y	38.12	14	4
comp98126_c3_seq1	884	C	T	Y	325.77	25	14
comp98126_c3_seq1	901	G	A	R	297.49	26	10
comp98126_c3_seq1	909	C	T	Y	422.62	26	17
comp98126_c3_seq1	926	G	A	R	36.72	30	6
comp98126_c3_seq1	932	C	T	Y	522.18	30	20
comp98126_c3_seq1	984	C	A	M	328.89	24	15
comp98126_c3_seq1	1024	G	T	K	258.93	22	11
comp98126_c3_seq1	1037	C	T	Y	77.34	16	5
comp98126_c3_seq1	1039	A	G	R	90.24	15	6
comp98126_c3_seq1	1044	C	T	Y	52.87	13	4
comp98126_c3_seq1	1051	G	A	R	41.13	13	4
comp98126_c3_seq1	1056	C	T	Y	44.14	12	4
comp98126_c3_seq1	1096	A	G	G	410.42	14	13
comp98126_c3_seq1	1174	T	C	C	419.29	11	11
comp92208_c0_seq1	344	T	C	C	603.58	16	16
comp92208_c0_seq1	672	C	A	A	146.42	4	4
comp92208_c0_seq1	722	G	A	A	219.48	6	6
comp87339_c0_seq1	26	C	T	Y	14.47	15	2
comp88153_c0_seq1	1615	G	A	A	1890.19	43	43
comp1255_c1_seq1	281	T	A	A	11.55	1	1
comp1255_c1_seq1	298	T	G	G	11.01	1	1
comp87631_c0_seq1	156	A	T	T	14.88	1	1
comp87631_c0_seq1	376	G	T	T	11.01	1	1
comp87631_c0_seq1	513	A	G	G	14.88	1	1
comp84166_c0_seq1	375	A	G	R	289.97	10	9
comp84166_c0_seq1	628	C	T	T	324.89	9	9
comp84166_c0_seq1	849	C	A	A	58.26	3	3
comp59964_c0_seq1	774	T	C	C	179.65	6	6
comp59964_c0_seq1	806	C	T	T	179.6	5	5
comp695281_c0_seq1	457	A	G	G	58.19	2	2
comp89379_c0_seq1	497	T	C	C	588.57	18	18
comp81653_c2_seq1	435	A	G	G	11.01	1	1
comp94488_c0_seq1	234	A	T	T	14.88	1	1
comp99218_c0_seq1	135	C	T	T	102.19	4	4
comp99218_c0_seq1	194	C	T	T	146.46	5	5
comp99218_c0_seq1	326	G	A	A	119.15	5	5
comp99218_c0_seq1	340	G	A	A	325.82	11	11
comp99218_c0_seq1	436	A	G	G	104.79	4	4
comp99218_c0_seq1	439	T	G	K	58.28	4	3
comp99218_c0_seq1	598	G	T	T	257.61	8	8
comp99218_c0_seq1	673	C	T	T	313.6	9	9
comp99218_c0_seq1	691	A	C	C	358.31	10	10
comp99218_c0_seq1	704	A	G	G	324.68	8	8
comp99218_c0_seq1	936	A	G	G	324.98	11	11
comp99218_c0_seq1	1035	T	A	A	492.11	16	16
comp99218_c0_seq1	1056	G	A	A	480.69	13	13
comp99218_c0_seq1	1092	A	C	M	86.34	17	4
comp99218_c0_seq1	1127	T	A	A	1599.99	46	46
comp99218_c0_seq1	1233	A	G	G	1166.66	32	32
comp96220_c0_seq1	152	G	A	A	950.57	24	24
comp96220_c0_seq1	242	G	A	A	1756.53	50	50
comp96220_c0_seq1	512	C	T	T	1471.74	36	36
comp96220_c0_seq1	551	C	T	T	1605.84	43	43
comp96220_c0_seq1	660	G	A	A	2024.26	55	55
comp96220_c0_seq1	1001	A	G	G	2013.07	56	56
comp96220_c0_seq1	1025	G	A	A	2281.92	61	61
comp96220_c0_seq1	1405	G	A	A	2647.26	64	64
comp96220_c0_seq1	2126	G	A	A	3320.25	95	95
comp96220_c0_seq1	2216	T	A	A	2537.18	64	64
comp96220_c0_seq1	2254	T	C	C	2299.53	60	60
comp96220_c0_seq1	2268	A	T	T	2076.09	59	59
comp96220_c0_seq1	2380	A	G	G	1625.82	43	43
comp96220_c0_seq1	2403	A	G	G	1406.41	38	38
comp96220_c0_seq1	2420	A	G,T	K	315.92	12	10
comp96220_c0_seq1	2423	C	T	T	501.91	15	15
comp96220_c0_seq1	2434	T	C	C	602.21	18	18
comp96220_c0_seq1	2444	G	A	A	806.96	23	23
comp63482_c0_seq1	18	A	G	G	42.2	2	2
comp90359_c0_seq1	63	A	G	G	14.52	1	1
comp90359_c0_seq1	145	C	A	A	14.82	1	1
comp90359_c0_seq1	488	C	T	T	35.63	2	2
comp90359_c0_seq1	505	A	C	C	35.63	2	2
comp90359_c0_seq1	508	T	C	C	35.63	2	2
comp90359_c0_seq1	520	T	A	A	68.27	3	3
comp90359_c0_seq1	563	C	A	A	145.72	5	5
comp90359_c0_seq1	633	C	A	A	157.06	6	6
comp90359_c0_seq1	644	T	C	C	157.02	5	5
comp90359_c0_seq1	675	A	C	C	90.81	3	3
comp90359_c0_seq1	777	A	G	G	43.11	2	2
comp90359_c0_seq1	788	G	A	A	43.11	2	2
comp90359_c0_seq1	794	G	A	A	43.08	2	2
comp90359_c0_seq1	809	A	C	C	43.11	2	2
comp84765_c0_seq1	411	A	G	G	982.63	30	30
comp84765_c0_seq1	446	T	C	C	580.1	18	18
comp84765_c0_seq1	455	T	C	C	501.94	16	16
comp84765_c0_seq1	456	T	A	A	501.94	16	16
comp84765_c0_seq1	461	G	A	A	568.81	18	18
comp84765_c0_seq1	478	G	A	A	435.07	14	14
comp103568_c0_seq1	46	A	C	M	191.11	18	9
comp103568_c0_seq1	119	G	A	A	3039.23	94	94
comp103568_c0_seq1	133	A	T	T	2921.11	92	92
comp103568_c0_seq1	185	T	C	C	1936.03	57	57
comp103568_c0_seq1	236	T	C	Y	11.61	19	2
comp103568_c0_seq1	264	A	T	T	581.98	16	16
comp103568_c0_seq1	283	A	C	C	659.97	18	18
comp103568_c0_seq1	354	C	T	T	766.9	22	22
comp103568_c0_seq1	386	A	G	G	1001.03	29	29
comp103568_c0_seq1	406	C	T	T	1009.35	26	26
comp103568_c0_seq1	421	G	A	A	1149.62	31	31
comp103568_c0_seq1	427	G	A	A	1146.22	29	29
comp103568_c0_seq1	461	G	T	T	872	21	21
comp103568_c0_seq1	516	C	A	A	749.31	22	22
comp103568_c0_seq1	542	G	A	A	1106.21	26	26
comp103568_c0_seq1	619	T	C	C	895.07	23	23
comp103568_c0_seq1	662	T	C	C	939.9	27	27
comp103568_c0_seq1	712	T	C	Y	17.86	25	3
comp103568_c0_seq1	713	G	C	S	17.86	25	3
comp103568_c0_seq1	776	T	C	C	3514.17	87	87
comp103568_c0_seq1	845	C	T	T	4311.9	125	125
comp103568_c0_seq1	848	G	T	T	4356.93	125	125
comp103568_c0_seq1	942	C	T	T	3621.2	94	94
comp103568_c0_seq1	985	A	T	T	2962.64	80	80
comp103568_c0_seq1	1080	T	C	C	1303.51	33	33
comp103568_c0_seq1	1220	T	A	A	14.88	1	1
comp103568_c0_seq1	1229	G	A	A	14.88	1	1
comp103568_c0_seq1	1249	T	A	A	14.88	1	1
comp103568_c0_seq1	1256	A	G	G	14.88	1	1
comp77319_c0_seq1	213	A	G	G	58.3	4	4
comp77319_c0_seq1	217	G	C	C	58.3	4	4
comp77319_c0_seq1	392	G	A	A	14.88	1	1
comp64756_c0_seq1	712	T	C	C	14.88	1	1
comp26188_c0_seq1	1466	A	G	G	14.88	1	1
comp102213_c2_seq1	525	C	T	T	235.54	7	7
comp102213_c2_seq1	622	A	G	G	58.21	2	2
comp102213_c2_seq1	665	A	G	G	58.21	2	2
comp82309_c1_seq1	91	C	T	T	102.19	4	4
comp82309_c1_seq1	152	T	C	C	102.19	4	4
comp82309_c1_seq1	714	G	A	A	58.21	2	2
comp88243_c0_seq1	74	A	G	R	32.37	9	2
comp88243_c0_seq1	77	A	T	W	23.36	12	2
comp88243_c0_seq1	79	A	T	W	17.4	14	2
comp88243_c0_seq1	1929	T	C	Y	45.89	166	14
comp88243_c0_seq1	1934	C	T	Y	109.39	163	16
comp88243_c0_seq1	1960	A	T	W	256.72	167	19
comp88243_c0_seq1	2002	G	A	R	841.08	179	34
comp88243_c0_seq1	2028	C	A	M	775.33	200	37
comp88243_c0_seq1	2038	C	T	Y	669.19	180	33
comp88243_c0_seq1	2049	C	T	Y	843.51	183	38
comp88243_c0_seq1	2245	A	T	W	815.28	128	35
comp88243_c0_seq1	2272	G	T	K	476.9	78	20
comp88243_c0_seq1	2313	T	A	W	53.81	16	4
comp73334_c0_seq1	400	T	A	W	13.55	10	2
comp90969_c1_seq1	21	A	G	G	79.56	3	3
comp90969_c1_seq1	57	G	A	A	46.96	3	3
comp90969_c1_seq1	459	C	T	T	190.9	5	5
comp90969_c1_seq1	965	T	A	A	224.29	8	8
comp45706_c0_seq1	353	A	G	R	27.27	99	9
comp97388_c0_seq1	118	G	C	S	113.18	6	5
comp97388_c0_seq1	158	C	A	A	86.13	3	3
comp97388_c0_seq1	265	T	C	C	14.88	1	1
comp97388_c0_seq1	309	G	C	S	41.31	6	2
comp97388_c0_seq1	326	A	C	M	158.31	10	6
comp97388_c0_seq1	377	A	G	R	80.15	11	4
comp97388_c0_seq1	421	A	C	M	116.59	9	5
comp97388_c0_seq1	422	G	C	S	161.33	9	7
comp34427_c0_seq1	23	A	G	G	14.88	1	1
comp34427_c0_seq1	338	C	A	A	1610.71	39	39
comp35348_c0_seq1	542	T	G	K	39.26	4	2
comp95401_c0_seq1	37	G	A	A	134.43	5	5
comp95401_c0_seq1	42	A	C	C	223.69	7	7
comp95401_c0_seq1	491	G	A	A	2013.52	54	54
comp95401_c0_seq1	1753	C	T	T	2237.11	58	58
comp95401_c0_seq1	1989	A	G	G	1297.75	35	35
comp72521_c0_seq1	4	A	C	C	14.88	1	1
comp72521_c0_seq1	721	G	T	K	19.95	29	3
comp72521_c0_seq1	1229	A	C	M	645.7	76	23
comp72521_c0_seq1	1245	T	A	W	34.96	120	10
comp72521_c0_seq1	1246	C	G	S	184.65	125	14
comp97869_c0_seq1	1163	A	T	T	14.88	1	1
comp96150_c0_seq1	281	A	G	R	84.42	5	3
comp96150_c0_seq1	572	A	G	R	80.15	9	4
comp63908_c0_seq1	220	A	G	G	14.88	1	1
comp63908_c0_seq1	287	A	G	G	14.92	2	2
comp63908_c0_seq1	298	A	G	G	14.92	2	2
comp63908_c0_seq1	344	T	C	C	14.88	1	1
comp63908_c0_seq1	355	A	G	G	14.88	1	1
comp96409_c0_seq1	1017	T	C	Y	33.67	10	2
comp96409_c0_seq1	2238	C	G	S	27.86	3	2
comp96409_c0_seq1	2283	A	G	G	130.4	4	4
comp96409_c0_seq1	2335	T	C	Y	65.81	10	3
comp96409_c0_seq1	2344	A	T	W	65.78	10	3
comp96409_c0_seq1	2345	T	A	W	65.81	10	3
comp96409_c0_seq1	2374	T	A	W	113.59	10	5
comp96409_c0_seq1	2413	T	C	Y	68.86	9	4
comp96409_c0_seq1	2425	A	T	W	68.86	9	4
comp96409_c0_seq1	2448	A	T	W	143.97	10	5
comp96409_c0_seq1	2459	C	A	M	143.96	10	5
comp96409_c0_seq1	2471	G	A	R	60.53	8	3
comp96409_c0_seq1	2497	A	G	R	47.42	4	2
comp96409_c0_seq1	2577	C	T	Y	119.61	7	5
comp96409_c0_seq1	2589	A	T	W	119.61	7	5
comp96392_c0_seq1	119	A	G	G	4753.18	142	142
comp96392_c0_seq1	225	T	C	C	6216.13	164	164
comp96392_c0_seq1	319	G	C	C	5433.99	141	141
comp96392_c0_seq1	390	G	C	C	346.5	9	9
comp96392_c0_seq1	399	A	G	R	38.42	7	2
comp96392_c0_seq1	416	T	C	C	167.83	5	5
comp96392_c0_seq1	450	G	C	C	123.36	4	4
comp96392_c0_seq1	452	G	A	A	79.09	3	3
comp96392_c0_seq1	529	T	C	C	79.09	3	3
comp96392_c0_seq1	599	T	C	C	14.88	1	1
comp96392_c0_seq1	631	T	C	C	58.21	2	2
comp96392_c0_seq1	672	C	G	G	14.88	1	1
comp96392_c0_seq1	869	G	A	A	146.46	5	5
comp96392_c0_seq1	870	G	A	A	146.46	5	5
comp96392_c0_seq1	951	G	A	A	235.58	8	8
comp96392_c0_seq1	972	T	A	A	235.54	7	7
comp96392_c0_seq1	1065	C	T	T	58.21	2	2
comp96392_c0_seq1	1074	A	T	T	58.21	2	2
comp96392_c0_seq1	1104	C	T	T	234.98	7	7
comp96392_c0_seq1	1138	T	G	G	185.64	7	7
comp96392_c0_seq1	1199	C	T	T	225.54	7	7
comp96392_c0_seq1	1228	T	G	G	107.82	4	4
comp93619_c0_seq1	257	G	A	R	10.23	11	2
comp93619_c0_seq1	357	T	G	K	24.11	9	2
comp58289_c0_seq1	322	C	T	T	179.42	6	6
comp58289_c0_seq1	355	C	A	A	224.2	6	6
comp86963_c0_seq1	519	G	A	A	2638.88	68	68
comp86963_c0_seq1	735	T	A	A	1207.63	32	32
comp86963_c0_seq1	738	T	G	G	1252.07	35	35
comp86963_c0_seq1	741	T	C	C	1252.61	36	36
comp86963_c0_seq1	851	A	G	R	331.22	13	12
comp86963_c0_seq1	854	A	T	T	210	8	8
comp86963_c0_seq1	863	C	T	T	284.33	10	10
comp86963_c0_seq1	887	T	C	C	317.69	11	11
comp86963_c0_seq1	936	T	C	C	151.67	6	6
comp103059_c0_seq1	115	A	G	R	47.42	4	2
comp103059_c0_seq1	187	A	G	R	115.37	11	5
comp103059_c0_seq1	214	T	C	Y	56.79	12	3
comp103059_c0_seq1	248	T	C	Y	87.93	9	4
comp103059_c0_seq1	280	G	A	A	68.27	3	3
comp103059_c0_seq1	284	G	C	S	27.86	3	2
comp103059_c0_seq1	299	T	C	Y	27.86	3	2
comp103059_c0_seq1	323	T	C	C	179.03	6	6
comp103059_c0_seq1	539	T	C	Y	130.86	6	4
comp103059_c0_seq1	639	A	T	W	26.36	11	2
comp103059_c0_seq1	728	A	G	R	23.36	12	2
comp103059_c0_seq1	734	A	C	M	68.07	12	3
comp103059_c0_seq1	947	T	C	Y	24.11	9	2
comp103059_c0_seq1	970	T	G	K	38.39	7	2
comp103059_c0_seq1	1085	A	T	W	118.82	11	4
comp103059_c0_seq1	1178	C	T	Y	23.4	13	3
comp103059_c0_seq1	1326	T	C	Y	82.52	9	3
comp103059_c0_seq1	1388	C	T	Y	166.55	9	5
comp103059_c0_seq1	1431	A	G	R	38.48	9	4
comp103059_c0_seq1	1466	G	T	K	38.39	7	2
comp103059_c0_seq1	1476	G	A	R	35.38	8	2
comp103059_c0_seq1	1622	A	G	R	105.24	8	4
comp98223_c0_seq1	38	T	A	W	1825.44	133	69
comp98223_c0_seq1	57	C	A	M	2424.57	184	94
comp98223_c0_seq1	64	A	T	W	2454.37	192	98
comp98223_c0_seq1	108	A	G	R	1691.46	170	70
comp98223_c0_seq1	172	T	C	Y	155.58	199	23
comp98223_c0_seq1	178	T	G	K	706.92	200	40
comp98223_c0_seq1	179	A	G	R	740.35	199	41
comp98223_c0_seq1	189	C	A	M	701.74	195	40
comp98223_c0_seq1	197	C	G	S	698.18	194	40
comp98223_c0_seq1	209	G	A	R	814.16	199	44
comp98223_c0_seq1	228	G	T	K	611.98	176	35
comp98223_c0_seq1	236	C	T	Y	429.47	186	30
comp98223_c0_seq1	246	G	A	R	429.06	195	33
comp98223_c0_seq1	249	C	G	S	633.9	195	40
comp98223_c0_seq1	282	G	A	R	328.62	200	27
comp98223_c0_seq1	301	T	A	W	1736	185	69
comp98223_c0_seq1	316	C	T	Y	1905.8	170	74
comp98223_c0_seq1	367	T	A	W	410.37	55	16
comp98223_c0_seq1	369	C	A	M	409.37	42	15
comp98223_c0_seq1	372	A	T	W	57.52	32	6
comp98223_c0_seq1	373	T	C	Y	57.52	32	6
comp98223_c0_seq1	405	A	T	W	10	11	2
comp98223_c0_seq1	407	A	T	W	10	11	2
comp98223_c0_seq1	480	A	G	R	47.42	4	2
comp98223_c0_seq1	505	A	G	R	127.85	7	4
comp98223_c0_seq1	882	A	G	R	77.1	9	3
comp98223_c0_seq1	888	T	A	W	80.11	8	3
comp98223_c0_seq1	914	C	T	Y	47.42	4	2
comp98223_c0_seq1	1126	T	C	Y	202.23	15	7
comp98223_c0_seq1	1171	G	A	R	244	14	8
comp98223_c0_seq1	1238	A	G	R	196.85	11	6
comp98223_c0_seq1	1326	A	T	W	129.15	5	4
comp98223_c0_seq1	1336	C	T	Y	129.15	5	4
comp98223_c0_seq1	1345	A	T	W	65.94	8	3
comp98223_c0_seq1	1349	A	T	W	102.94	9	4
comp98223_c0_seq1	1352	A	T	W	105.95	8	4
comp98223_c0_seq1	1423	C	T	Y	17.54	44	5
comp98223_c0_seq1	1429	G	A	R	20.51	43	5
comp98223_c0_seq1	2648	T	C	Y	18.14	10	2
comp91803_c0_seq1	68	A	G	G	14.88	1	1
comp91803_c0_seq1	108	C	T	T	1738.54	41	41
comp91803_c0_seq1	112	T	C	C	2001.98	49	49
comp91803_c0_seq1	181	G	T	T	3377.45	93	93
comp91803_c0_seq1	187	C	T	T	3507.41	97	97
comp91803_c0_seq1	760	G	A	A	2740.66	77	77
comp91803_c0_seq1	796	C	T	T	2650.9	66	66
comp91803_c0_seq1	865	C	T	T	2292.68	60	60
comp91803_c0_seq1	967	T	C	C	3019.49	73	73
comp91803_c0_seq1	981	T	C	C	2794.43	75	75
comp91803_c0_seq1	1223	T	C	C	90.79	3	3
comp118015_c0_seq1	1226	A	C	M	17.4	17	2
comp63112_c0_seq1	476	T	C	C	14.92	2	2
comp88750_c0_seq1	6	G	A	A	10.43	1	1
comp100979_c0_seq1	66	A	G	G	146.39	4	4
comp100979_c0_seq1	117	T	C	Y	20.37	14	2
comp100979_c0_seq1	142	G	A	A	1458.14	39	39
comp100979_c0_seq1	235	A	C	C	3577.68	92	92
comp100979_c0_seq1	529	G	A	A	5455.87	136	136
comp100979_c0_seq1	597	A	G	G	6036.88	147	147
comp100979_c0_seq1	635	A	C	C	7286.77	185	185
comp100979_c0_seq1	910	C	T	T	4703.17	136	129
comp100979_c0_seq1	939	T	C	C	5624.31	146	146
comp100979_c0_seq1	963	T	C	C	6067.01	160	160
comp100979_c0_seq1	977	T	C	C	5712.3	151	151
comp100979_c0_seq1	1130	T	C	C	4753.06	115	115
comp100979_c0_seq1	1197	A	T	T	4648.07	125	125
comp100979_c0_seq1	1238	T	C	C	4629.38	116	116
comp100979_c0_seq1	1275	A	G	G	4398.42	122	122
comp100979_c0_seq1	1305	G	A	A	4165.59	112	112
comp100979_c0_seq1	1320	A	G	G	4377.37	121	121
comp100979_c0_seq1	1418	G	A	A	3066.71	75	75
comp100979_c0_seq1	1519	T	C	C	3632.23	90	89
comp100979_c0_seq1	1549	C	T	T	4178.39	109	108
comp100979_c0_seq1	1551	A	G	G	4312.79	115	114
comp100979_c0_seq1	1847	C	A	A	2818.66	73	73
comp100979_c0_seq1	1878	G	A	A	2717.95	72	72
comp100979_c0_seq1	2043	G	A	A	3348.59	92	92
comp100979_c0_seq1	2055	G	C	C	3111.45	90	90
comp100979_c0_seq1	2058	T	C	C	3273.7	93	93
comp100979_c0_seq1	2371	A	G	G	3757.66	97	97
comp100979_c0_seq1	2457	T	C	C	2973.59	74	73
comp100979_c0_seq1	2499	A	C	C	2740.49	73	72
comp100979_c0_seq1	2586	G	A	A	2661.18	66	66
comp100979_c0_seq1	2607	A	T	T	2694.78	71	71
comp100979_c0_seq1	2614	T	G	G	2669.2	71	71
comp100979_c0_seq1	2754	T	A	A	1599.42	40	40
comp100979_c0_seq1	2771	C	T	T	503.73	12	12
comp100979_c0_seq1	2796	G	T	T	14.88	1	1
comp89210_c4_seq1	174	C	A	A	14.88	1	1
comp96891_c0_seq1	44	T	C	Y	11.57	11	2
comp96891_c0_seq1	463	C	T	Y	166.99	26	7
comp96891_c0_seq1	464	T	C	Y	19.74	22	3
comp96891_c0_seq1	468	A	G	R	12.31	15	2
comp96891_c0_seq1	533	T	C	Y	88.48	10	4
comp96891_c0_seq1	534	A	T	W	126.66	11	5
comp92585_c2_seq1	409	C	T	Y	33.49	20	4
comp92585_c2_seq1	428	G	A	R	18.5	22	4
comp92585_c2_seq1	480	C	T	Y	21.73	20	3
comp92585_c2_seq1	488	T	C	Y	10.79	20	3
comp80381_c0_seq1	389	T	C	C	14.84	1	1
comp92482_c0_seq1	132	T	C	C	14.88	1	1
comp92482_c0_seq1	296	A	G	G	58.21	2	2
comp104349_c0_seq1	1621	A	G	R	35.37	8	2
comp97893_c2_seq1	1294	T	G	K	10.22	10	2
comp97893_c2_seq1	1299	C	A	M	10.22	9	2
comp97893_c2_seq1	1330	C	T	Y	39.69	5	2
comp97893_c2_seq1	1343	A	T	W	76.15	4	3
comp97893_c2_seq1	1711	G	A	R	50.44	3	2
comp97893_c2_seq1	1766	C	T	Y	21.86	5	2
comp97893_c2_seq1	1801	A	C	M	47.42	4	2
comp97893_c2_seq1	1803	T	G	K	47.42	4	2
comp97893_c2_seq1	2425	T	G	G	14.88	1	1
comp94681_c0_seq1	468	C	A	A	14.88	1	1
comp94681_c0_seq1	800	T	C	C	14.52	1	1
comp94681_c0_seq1	1426	G	A	A	14.92	2	2
comp94681_c0_seq1	1679	A	C	C	58.21	2	2
comp96904_c1_seq1	151	C	T	T	189.97	5	5
comp96904_c1_seq1	322	T	C	C	102.15	3	3
comp96904_c1_seq1	353	C	A	A	102.15	3	3
comp96904_c1_seq1	1023	C	T	T	146.42	4	4
comp95702_c0_seq1	269	C	T	T	58.21	2	2
comp95702_c0_seq1	631	G	T	T	58.26	3	3
comp95702_c0_seq1	754	C	T	T	146.42	4	4
comp95702_c0_seq1	1020	T	C	C	190.98	7	7
comp95702_c0_seq1	1036	T	C	C	235.53	7	7
comp95702_c0_seq1	1072	A	G	G	146.42	4	4
comp95702_c0_seq1	1351	A	T	T	58.3	4	4
comp95702_c0_seq1	1354	G	A	A	58.3	4	4
comp95702_c0_seq1	1744	T	C	C	90.63	3	3
comp95702_c0_seq1	1890	C	T	T	58.21	2	2
comp94363_c1_seq1	164	A	G	G	135	4	4
comp94363_c1_seq1	395	T	C	C	280.22	9	9
comp94363_c1_seq1	928	G	A	A	58.26	3	3
comp85634_c0_seq1	370	A	G	G	14.88	1	1
comp87450_c0_seq1	815	C	T	T	35.63	2	2
comp103499_c1_seq1	88	C	T	T	14.88	1	1
comp103499_c1_seq1	337	A	T	T	190.94	6	6
comp103499_c1_seq1	376	T	A	A	14.84	1	1
comp103499_c1_seq1	684	C	T	T	102.15	3	3
comp103499_c1_seq1	716	C	T	T	102.19	4	4
comp103499_c1_seq1	796	A	G	G	14.88	1	1
comp103499_c1_seq1	906	C	G	G	179.69	7	7
comp103499_c1_seq1	917	C	T	T	146.46	5	5
comp101817_c0_seq1	45	G	A	R	47.42	4	2
comp101817_c0_seq1	249	A	G	G	79.56	3	3
comp101817_c0_seq1	297	A	G	G	79.56	3	3
comp101817_c0_seq1	342	G	C	S	21.86	5	2
comp101817_c0_seq1	345	T	C	Y	21.86	5	2
comp101817_c0_seq1	771	T	C	C	14.88	1	1
comp101817_c0_seq1	776	G	A	A	58.21	2	2
comp101817_c0_seq1	787	T	A	A	58.21	2	2
comp101817_c0_seq1	816	T	C	C	142.34	4	4
comp101817_c0_seq1	894	A	G	G	102.15	3	3
comp101817_c0_seq1	952	C	T	T	12.88	1	1
comp101817_c0_seq1	1100	C	T	T	58.21	2	2
comp101817_c0_seq1	1148	C	G	G	14.88	1	1
comp101817_c0_seq1	1358	A	G	G	90.9	4	4
comp101817_c0_seq1	1359	C	A	A	90.9	4	4
comp101817_c0_seq1	1369	G	A	A	90.9	4	4
comp101817_c0_seq1	1375	G	A	A	90.9	4	4
comp101817_c0_seq1	1449	C	T	T	46.92	2	2
comp101817_c0_seq1	1484	A	G	G	46.92	2	2
comp101817_c0_seq1	1499	C	T	T	46.92	2	2
comp101817_c0_seq1	1544	G	T	T	23.88	2	2
comp101817_c0_seq1	1560	C	T	T	67.8	3	3
comp101817_c0_seq1	1570	G	A	A	67.8	3	3
comp101817_c0_seq1	1592	G	A	A	35.16	2	2
comp101817_c0_seq1	1593	G	T	T	35.16	2	2
comp101817_c0_seq1	1745	T	C	C	35.16	2	2
comp101817_c0_seq1	1772	T	C	C	35.16	2	2
comp101817_c0_seq1	1773	A	G	G	35.16	2	2
comp101817_c0_seq1	1777	G	A	A	35.16	2	2
comp101817_c0_seq1	1827	C	A	A	58.21	2	2
comp101817_c0_seq1	1861	T	A	A	102.19	4	4
comp101817_c0_seq1	1892	A	G	G	102.23	5	5
comp101817_c0_seq1	1945	A	C	C	146.46	5	5
comp101817_c0_seq1	1975	C	T	T	102.23	5	5
comp101817_c0_seq1	1990	C	G	G	102.15	3	3
comp101817_c0_seq1	2032	T	C	C	14.88	1	1
comp104631_c0_seq1	88	G	A	R	20.27	3	2
comp104631_c0_seq1	110	T	C	Y	11.52	6	2
comp104631_c0_seq1	191	A	C	M	21.11	10	2
comp104631_c0_seq1	285	C	T	Y	174.99	13	7
comp104631_c0_seq1	289	G	A	R	178	12	7
comp104631_c0_seq1	314	T	G	K	43.23	9	3
comp104631_c0_seq1	445	T	C	Y	36.13	4	2
comp104631_c0_seq1	663	T	C	Y	23.36	13	2
comp104631_c0_seq1	1029	C	T	Y	164.79	13	7
comp104631_c0_seq1	1050	C	T	Y	236.91	15	9
comp104631_c0_seq1	1059	G	A	R	209.52	13	8
comp104631_c0_seq1	1068	G	A	R	182.9	12	7
comp104631_c0_seq1	1096	G	C	S	84.94	10	4
comp104631_c0_seq1	1155	C	T	Y	234.13	18	8
comp104631_c0_seq1	1238	C	T	Y	210.05	184	18
comp639_c1_seq1	198	C	T	T	14.88	1	1
comp97017_c0_seq1	40	C	G	S	229.26	11	7
comp97017_c0_seq1	262	C	T	Y	425.64	36	17
comp97017_c0_seq1	294	T	C	Y	509.02	39	17
comp97017_c0_seq1	334	A	G	R	595.47	34	19
comp97017_c0_seq1	381	C	A	M	169.22	29	8
comp97017_c0_seq1	510	T	C	Y	333.79	26	11
comp97017_c0_seq1	612	A	T	W	167.63	17	6
comp97017_c0_seq1	613	T	G	K	167.63	17	6
comp97017_c0_seq1	775	G	C	S	32.38	11	2
comp96238_c0_seq1	51	T	A	W	27.86	3	2
comp96238_c0_seq1	124	A	T	W	21.86	7	2
comp96238_c0_seq1	153	T	C	C	58.26	3	3
comp96238_c0_seq1	175	A	T	T	58.21	2	2
comp96238_c0_seq1	218	A	G	G	90.85	3	3
comp96238_c0_seq1	239	A	G	G	135.17	5	5
comp96238_c0_seq1	385	C	A	A	14.88	1	1
comp94644_c0_seq1	39	T	C	C	14.88	1	1
comp94644_c0_seq1	149	T	C	Y	32.37	10	2
comp94644_c0_seq1	169	G	A	R	74.09	10	3
comp94644_c0_seq1	271	A	G	R	161.28	7	5
comp94644_c0_seq1	359	G	A	R	71.83	8	3
comp94644_c0_seq1	717	C	T	Y	133.91	6	5
comp97013_c0_seq1	584	C	T	T	2728.36	79	79
comp97013_c0_seq1	697	C	T	T	2512.28	59	59
comp97013_c0_seq1	1002	T	G	G	581.88	16	16
comp97013_c0_seq1	1011	G	A	A	492.57	15	15
comp97013_c0_seq1	1093	C	T	T	1308.6	37	37
comp94640_c3_seq1	192	G	A	R	27.86	3	2
comp94640_c3_seq1	193	T	C	Y	27.86	3	2
comp94640_c3_seq1	303	C	A	M	16.21	3	2
comp94640_c3_seq1	310	A	T	W	16.21	3	2
comp94640_c3_seq1	334	A	G	G	23.88	2	2
comp94640_c3_seq1	359	A	T	T	56.5	3	3
comp94640_c3_seq1	380	A	G	G	85.66	4	4
comp94640_c3_seq1	426	G	A	A	52.69	3	3
comp94640_c3_seq1	434	T	G	G	52.69	3	3
comp94640_c3_seq1	449	C	T	T	20.1	2	2
comp83057_c1_seq1	198	A	G	G	14.16	1	1
comp83057_c1_seq1	733	T	C	C	3589.58	93	93
comp83057_c1_seq1	820	G	A	A	4237.55	109	109
comp83057_c1_seq1	946	C	T	Y	39.74	30	4
comp83057_c1_seq1	947	C	T	Y	39.74	30	4
comp83057_c1_seq1	952	C	T	Y	2064.04	89	68
comp83057_c1_seq1	2414	A	C	C	14.88	1	1
comp46172_c0_seq1	1057	T	A	A	14.85	1	1
comp101930_c2_seq1	605	G	C	C	68.27	3	3
comp101930_c2_seq1	606	C	A	A	68.27	3	3
comp101930_c2_seq1	671	T	A	A	35.63	2	2
comp101930_c2_seq1	842	G	T	T	35.63	2	2
comp101930_c2_seq1	894	G	C	C	35.63	2	2
comp100601_c1_seq1	2062	T	A	A	14.88	1	1
comp116894_c0_seq1	157	T	G	K	11.61	19	2
comp69423_c0_seq1	664	A	G	R	19.89	12	2
comp87024_c0_seq1	837	T	C	Y	1331.14	87	43
comp87024_c0_seq1	895	C	A	M	1697.19	93	48
comp87024_c0_seq1	951	A	T	W	1972.37	112	64
comp87024_c0_seq1	1091	A	G	R	22.94	27	3
comp90932_c0_seq1	106	G	A	A	35.63	2	2
comp90932_c0_seq1	135	G	A	A	79.56	3	3
comp90932_c0_seq1	154	T	A	A	112.58	5	5
comp90932_c0_seq1	160	T	A	A	112.58	5	5
comp90932_c0_seq1	218	T	G	G	1807.17	47	47
comp90932_c0_seq1	382	G	A	A	6527.07	158	158
comp90932_c0_seq1	602	G	A	A	6140.05	162	162
comp90932_c0_seq1	958	A	G	G	6564.03	165	165
comp90932_c0_seq1	1294	A	G	G	6980.54	176	176
comp82975_c0_seq1	401	T	A	A	58.21	2	2
comp82975_c0_seq1	453	A	G	G	14.88	1	1
comp82975_c0_seq1	792	A	T	T	102.15	3	3
comp82975_c0_seq1	917	C	T	T	14.88	1	1
comp82975_c0_seq1	947	A	G	G	102.15	3	3
comp85416_c0_seq1	272	A	C	M	24.4	4	2
comp85416_c0_seq1	273	G	T	K	24.4	4	2
comp85416_c0_seq1	274	A	T	W	24.4	4	2
comp85416_c0_seq1	275	T	A	W	24.4	4	2
comp85416_c0_seq1	363	T	A	W	15.48	7	2
comp85416_c0_seq1	364	T	A	W	57.08	8	3
comp85416_c0_seq1	366	C	T	Y	57.08	8	3
comp94420_c0_seq1	411	C	T	T	102.15	3	3
comp94420_c0_seq1	504	T	A	A	58.21	2	2
comp94420_c0_seq1	521	C	T	T	58.21	2	2
comp94420_c0_seq1	590	G	A	A	14.88	1	1
comp94420_c0_seq1	1185	T	A	A	347.02	10	10
comp94420_c0_seq1	1579	C	T	T	275.52	9	9
comp70381_c0_seq1	332	A	G	G	14.88	1	1
comp95118_c0_seq1	120	C	T	T	280.2	8	8
comp95118_c0_seq1	625	T	C	C	14.88	1	1
comp93549_c0_seq1	834	C	T	T	3373.67	85	85
comp93549_c0_seq1	951	G	A	A	1833.48	52	52
comp93549_c0_seq1	1080	T	C	C	1800.33	49	49
comp93549_c0_seq1	1110	A	G	G	2583.42	63	63
comp93549_c0_seq1	1383	G	A	A	2401.01	64	64
comp93549_c0_seq1	1428	A	G	G	1923.76	46	46
comp93549_c0_seq1	1494	A	T	T	2080.25	53	53
comp93549_c0_seq1	1499	C	T	T	1722.37	46	45
comp93549_c0_seq1	1701	G	A	A	1890.45	47	47
comp93549_c0_seq1	1702	G	T	T	1890.08	47	47
comp93549_c0_seq1	1830	T	G	G	1818.46	47	47
comp93549_c0_seq1	2019	G	C	C	1521.04	41	41
comp19114_c0_seq1	339	A	C	M	41.4	7	2
comp102809_c0_seq1	921	A	G	G	190.9	5	5
comp102809_c0_seq1	2163	G	A	A	771.85	24	23
comp102809_c0_seq1	2164	C	G	G	816.42	23	23
comp102809_c0_seq1	2167	G	A	A	816.5	23	23
comp102809_c0_seq1	4286	G	A	A	531.1	16	16
comp102809_c0_seq1	4292	G	A	A	486.37	15	15
comp102809_c0_seq1	4316	C	T	T	201.1	7	7
comp102809_c0_seq1	4320	C	T	T	201.1	7	7
comp102809_c0_seq1	4337	C	T	T	234.5	8	8
comp102809_c0_seq1	4345	G	A	A	234.5	8	8
comp102809_c0_seq1	4351	A	G	G	201.1	7	7
comp102809_c0_seq1	4355	T	A	A	201.1	7	7
comp102809_c0_seq1	4365	A	G	G	167.73	6	6
comp102809_c0_seq1	4372	C	A	A	167.73	6	6
comp58939_c0_seq1	663	A	G	R	35.38	10	2
comp61254_c0_seq1	74	T	A	A	14.88	1	1
comp61254_c0_seq1	1085	G	T	K	53.21	126	11
comp61254_c0_seq1	2223	T	A	W	17.35	14	2
comp61254_c0_seq1	2269	T	G	G	14.88	1	1
comp90574_c0_seq1	48	T	G	G	58.21	2	2
comp90574_c0_seq1	188	T	C	C	102.15	3	3
comp90574_c0_seq1	282	A	G	G	46.92	2	2
comp90574_c0_seq1	290	T	C	C	46.92	2	2
comp90574_c0_seq1	433	A	T	W	57.53	8	3
comp90574_c0_seq1	434	A	G	R	54.52	9	3
comp90574_c0_seq1	438	A	G	R	76.66	9	4
comp90574_c0_seq1	663	C	T	T	79.56	3	3
comp90574_c0_seq1	677	C	T	T	46.92	2	2
comp86869_c0_seq1	573	C	A	A	425.12	11	11
comp86869_c0_seq1	805	C	T	T	425.17	12	12
comp60904_c0_seq1	1836	T	G	K	34.21	27	3
comp38792_c0_seq1	479	T	G	G	58.21	2	2
comp38792_c0_seq1	558	T	A	A	14.88	1	1
comp38792_c0_seq1	559	A	T	T	14.88	1	1
comp102242_c2_seq1	123	A	G	R	112.79	14	4
comp102242_c2_seq1	191	G	T	K	142.6	21	8
comp102242_c2_seq1	209	C	T	Y	139.5	20	6
comp102242_c2_seq1	264	T	C	Y	11.65	19	3
comp102242_c2_seq1	305	T	C	Y	103.76	15	4
comp102242_c2_seq1	439	T	G	K	557.43	26	16
comp102242_c2_seq1	473	T	C	Y	682.67	33	21
comp102242_c2_seq1	476	T	A	W	682.67	33	21
comp102242_c2_seq1	708	G	A	R	453.76	31	16
comp102242_c2_seq1	725	A	G	R	442.33	25	13
comp102242_c2_seq1	731	A	T	W	400.58	24	12
comp102242_c2_seq1	826	A	T	W	84.25	5	3
comp84064_c1_seq1	37	A	T	T	14.88	1	1
comp58438_c1_seq1	983	A	T	T	10.43	1	1
comp58438_c1_seq1	984	T	G	G	10.43	1	1
comp93923_c0_seq1	388	C	G	S	21.44	22	3
comp93923_c0_seq1	919	A	T	T	14.88	1	1
comp92658_c0_seq1	230	A	G	G	14.88	1	1
comp92658_c0_seq1	466	T	C	C	102.19	4	4
comp92658_c0_seq1	683	A	G	G	102.15	3	3
comp94680_c0_seq1	496	G	T	K	131.49	13	6
comp94680_c0_seq1	502	G	T	K	154.3	14	7
comp94680_c0_seq1	526	G	C	S	217.41	19	9
comp94680_c0_seq1	531	C	T	Y	286.55	22	11
comp94680_c0_seq1	550	G	T	K	393.95	24	14
comp94680_c0_seq1	595	T	C	Y	239.89	66	13
comp94680_c0_seq1	636	T	C	Y	85.36	101	10
comp94680_c0_seq1	652	G	A	R	49.66	96	9
comp101940_c1_seq1	220	C	A	M	35.38	9	2
comp102381_c0_seq1	323	A	G	R	97.07	92	13
comp102381_c0_seq1	357	C	T	Y	156.75	116	19
comp102381_c0_seq1	372	T	C	Y	212.5	127	22
comp102381_c0_seq1	412	T	C	Y	13.67	146	16
comp102381_c0_seq1	422	T	A	W	18.94	136	15
comp102381_c0_seq1	455	A	T	W	83.86	134	18
comp102381_c0_seq1	461	T	C	Y	77.84	137	18
comp102381_c0_seq1	466	G	T	K	121.23	137	20
comp102381_c0_seq1	481	C	T	Y	59.16	143	17
comp102381_c0_seq1	527	C	T	Y	174.04	134	18
comp102381_c0_seq1	542	T	A	W	425.42	133	26
comp102381_c0_seq1	551	G	A	R	660.97	136	32
comp102381_c0_seq1	578	C	T	Y	1041.11	154	44
comp102381_c0_seq1	605	G	A	R	1252.03	145	51
comp102381_c0_seq1	710	G	A	R	1747.34	169	62
comp102381_c0_seq1	713	T	C	Y	1525.64	161	56
comp102381_c0_seq1	773	A	C	M	814	141	37
comp102381_c0_seq1	786	C	T	Y	462.14	120	25
comp102381_c0_seq1	790	T	A	W	501.42	125	27
comp102381_c0_seq1	794	G	C	S	580.92	124	30
comp102381_c0_seq1	818	G	A	R	512.79	126	26
comp102381_c0_seq1	857	A	G	R	385.37	114	22
comp102381_c0_seq1	887	G	T	K	64.5	107	12
comp102381_c0_seq1	890	C	T	Y	46.11	103	11
comp102381_c0_seq1	893	A	G	R	49.12	103	11
comp102381_c0_seq1	902	G	C	S	213.62	115	17
comp102381_c0_seq1	917	T	C	Y	78.93	92	11
comp102381_c0_seq1	920	A	G	R	78.93	93	11
comp102381_c0_seq1	928	T	C	Y	228.05	100	16
comp102381_c0_seq1	947	G	A	R	277.48	117	19
comp102381_c0_seq1	980	G	A	R	97.94	105	13
comp102381_c0_seq1	983	T	A	W	100.95	104	13
comp102381_c0_seq1	984	T	C	Y	97.94	104	13
comp102381_c0_seq1	1013	T	C	Y	882.59	114	33
comp102381_c0_seq1	1019	G	A	R	1006.11	119	36
comp102381_c0_seq1	1064	T	A	W	1494.99	119	55
comp102381_c0_seq1	1112	A	T	W	1668.45	139	57
comp102381_c0_seq1	1163	T	C	Y	1328.23	136	48
comp102381_c0_seq1	1227	T	C	Y	876.93	97	31
comp102381_c0_seq1	1259	A	T	W	515.36	110	23
comp102381_c0_seq1	1262	T	C	Y	431.91	113	21
comp102381_c0_seq1	1277	C	G	S	158.76	101	14
comp102381_c0_seq1	1280	G	A	R	113.06	107	13
comp102381_c0_seq1	1285	T	C	Y	302.48	111	20
comp102381_c0_seq1	1304	A	G	R	212.61	104	17
comp102381_c0_seq1	1322	C	T	Y	287.57	117	19
comp102381_c0_seq1	1328	C	G	S	348.42	121	21
comp102381_c0_seq1	1343	A	G	R	370.04	112	21
comp102381_c0_seq1	1424	T	G	K	386.22	123	26
comp102381_c0_seq1	1430	A	G	R	392.24	121	26
comp102381_c0_seq1	1442	T	A	W	135.95	108	17
comp102381_c0_seq1	1444	A	G	R	99.5	108	16
comp102381_c0_seq1	1482	T	C	Y	91.19	85	15
comp102381_c0_seq1	1485	T	C	Y	91.15	86	14
comp102381_c0_seq1	1490	G	A	R	105.18	96	16
comp102381_c0_seq1	1496	C	T	Y	153.99	102	18
comp102381_c0_seq1	1499	T	C	Y	153.99	101	18
comp102381_c0_seq1	1509	C	T	Y	223.84	78	19
comp102381_c0_seq1	1512	G	A	R	220.83	79	19
comp102381_c0_seq1	1524	A	G	R	164.17	70	15
comp102381_c0_seq1	1528	C	T	Y	164.17	71	15
comp102381_c0_seq1	1552	G	C	S	245.09	81	18
comp102381_c0_seq1	1557	T	C	Y	251.11	79	18
comp102381_c0_seq1	1559	T	C	Y	282.08	83	19
comp102381_c0_seq1	1602	G	A	R	410.08	84	25
comp102381_c0_seq1	1648	G	C	S	132.52	71	12
comp102381_c0_seq1	1650	A	G	R	31.12	66	9
comp102381_c0_seq1	1654	G	T	K	25.11	68	9
comp102381_c0_seq1	2114	G	A	A	102.15	3	3
comp103098_c0_seq1	60	G	T	K	34.98	24	3
comp103098_c0_seq1	129	C	T	Y	24.77	35	4
comp103098_c0_seq1	357	T	C	Y	113.54	9	4
comp103098_c0_seq1	371	G	T	K	86.17	7	4
comp103098_c0_seq1	410	G	T	K	130.81	6	4
comp103098_c0_seq1	442	G	A	R	127.89	10	6
comp103098_c0_seq1	500	G	T	K	35.38	9	2
comp103098_c0_seq1	1017	T	G	K	12.63	9	3
comp103098_c0_seq1	1087	T	C	Y	15.79	26	3
comp103098_c0_seq1	1165	A	G	R	23.39	13	2
comp103098_c0_seq1	1171	C	T	Y	61.9	11	4
comp103098_c0_seq1	1176	T	G	K	61.9	10	4
comp103098_c0_seq1	1186	T	C	Y	40.21	10	3
comp103098_c0_seq1	1277	C	T	Y	18.14	13	2
comp103098_c0_seq1	1284	G	A	R	18.14	13	2
comp103098_c0_seq1	1354	G	C	S	39.01	17	3
comp103098_c0_seq1	1400	T	C	Y	72.45	17	4
comp103098_c0_seq1	1482	A	G	R	36.13	4	2
comp103098_c0_seq1	1714	C	T	Y	29.37	10	2
comp103098_c0_seq1	1839	G	C	S	152.25	11	5
comp103098_c0_seq1	1869	G	T	K	65.81	10	3
comp103098_c0_seq1	1959	T	C	Y	28.4	5	2
comp103098_c0_seq1	2034	A	C	C	86.18	4	4
comp103098_c0_seq1	2042	A	C	C	86.18	4	4
comp100312_c1_seq1	446	T	C	Y	479.74	139	25
comp100312_c1_seq1	656	A	G	R	100.05	193	20
comp100312_c1_seq1	663	T	C	Y	145.85	200	22
comp100312_c1_seq1	680	C	T	Y	553.89	192	33
comp100312_c1_seq1	684	A	T	W	724.52	183	37
comp100312_c1_seq1	758	G	A	R	1434.63	195	60
comp100312_c1_seq1	779	T	G	K	1821.58	186	59
comp100312_c1_seq1	880	T	C	Y	1049.74	194	41
comp100312_c1_seq1	899	T	C	Y	811.9	197	36
comp100312_c1_seq1	945	G	A	R	354.91	161	21
comp100312_c1_seq1	998	G	A	R	198.09	132	14
comp100312_c1_seq1	1004	G	A	R	213.46	141	15
comp100312_c1_seq1	1019	C	G	S	174.19	151	16
comp100312_c1_seq1	1067	C	T	Y	192.57	132	17
comp100312_c1_seq1	1080	A	G	R	123	133	16
comp100312_c1_seq1	1084	G	A	R	132.03	132	16
comp100312_c1_seq1	1099	T	C	Y	18.48	104	10
comp100312_c1_seq1	1116	T	C	Y	380.62	105	19
comp100312_c1_seq1	1159	C	T	T	3814.03	102	101
comp100312_c1_seq1	1172	G	A	R	366.75	96	18
comp100312_c1_seq1	1249	T	A	W	2189.28	188	74
comp100312_c1_seq1	1409	T	A	W	2106.88	143	69
comp100312_c1_seq1	1614	C	A	A	1050.9	27	27
comp100312_c1_seq1	2027	G	C	C	1419.12	39	38
comp100312_c1_seq1	2052	A	T	W	1642.29	87	52
comp100312_c1_seq1	2083	A	G	R	2360.88	107	73
comp100312_c1_seq1	2084	T	C	Y	2226.42	108	69
comp100312_c1_seq1	2229	G	T	K	1702.85	95	54
comp100312_c1_seq1	2291	G	T	K	1576.88	158	56
comp100312_c1_seq1	2365	G	A	R	1971.04	184	77
comp100312_c1_seq1	2387	A	G	G	6016.45	170	170
comp100312_c1_seq1	2411	T	A	A	4684.59	129	128
comp100312_c1_seq1	2459	C	A	M	1147.48	97	44
comp100312_c1_seq1	2463	G	A	R	2395.98	88	79
comp100312_c1_seq1	2470	A	C	M	2130.94	80	71
comp100312_c1_seq1	2485	T	G	K	1733.23	69	60
comp100312_c1_seq1	2492	A	G	R	1702.8	68	59
comp100312_c1_seq1	2497	G	A	R	1702.8	68	59
comp100312_c1_seq1	2505	A	G	R	701.24	57	27
comp100312_c1_seq1	2510	T	C	Y	330.12	47	15
comp100312_c1_seq1	2528	G	T	T	669.11	23	22
comp100312_c1_seq1	2531	T	C	C	669.11	23	22
comp52622_c0_seq1	1171	G	A	A	475.08	15	15
comp52622_c0_seq1	1174	C	G	G	475.08	15	15
comp52622_c0_seq1	1180	C	T	T	408.21	13	13
comp84208_c0_seq1	2147	A	T	T	14.88	1	1
comp84208_c0_seq1	2441	C	G	G	90.85	3	3
comp74206_c0_seq1	215	T	C	C	190.9	5	5
comp74206_c0_seq1	219	A	C	C	190.9	5	5
comp74206_c0_seq1	602	G	T	T	1398.24	33	33
comp74206_c0_seq1	653	G	A	A	1264.06	32	32
comp74206_c0_seq1	767	C	T	T	772.07	19	19
comp99257_c0_seq1	177	A	G	G	1150.31	32	32
comp99257_c0_seq1	187	T	C	C	1250.61	35	35
comp99257_c0_seq1	275	A	C	M	188.07	13	6
comp99257_c0_seq1	282	C	T	Y	54.8	34	7
comp99257_c0_seq1	297	G	A	R	55.13	45	8
comp99257_c0_seq1	304	A	G	R	58.14	44	8
comp99257_c0_seq1	311	A	G	R	143.39	50	11
comp99257_c0_seq1	313	G	A	R	106.95	51	10
comp99257_c0_seq1	318	T	C	Y	100.93	53	10
comp99257_c0_seq1	321	G	A	R	100.93	53	10
comp99257_c0_seq1	335	G	A	R	171.11	65	13
comp99257_c0_seq1	349	G	C	S	76.86	81	11
comp99257_c0_seq1	359	A	C	M	544.69	101	26
comp99257_c0_seq1	378	G	A	A	3437.44	100	99
comp99257_c0_seq1	386	G	A	R	594.23	98	29
comp99257_c0_seq1	388	T	A	W	591.22	101	29
comp99257_c0_seq1	389	A	T	W	588.21	102	29
comp99257_c0_seq1	448	A	G	R	1885.01	156	63
comp99257_c0_seq1	473	A	G	R	2242.23	192	82
comp99257_c0_seq1	502	T	A	W	2960.63	180	99
comp99257_c0_seq1	524	A	G	R	1912.31	183	78
comp99257_c0_seq1	532	G	A	R	1843.93	190	76
comp99257_c0_seq1	553	A	G	R	1455.14	160	60
comp99257_c0_seq1	589	T	C	Y	703.88	97	33
comp99257_c0_seq1	609	G	T	T	2264.1	60	60
comp99257_c0_seq1	614	T	C	Y	205.17	52	13
comp95918_c0_seq1	507	A	G	G	235.5	6	6
comp95918_c0_seq1	685	C	T	T	235.5	7	7
comp95918_c0_seq1	744	A	G	G	369.55	9	9
comp95918_c0_seq1	1047	C	T	T	146.42	4	4
comp95918_c0_seq1	1048	A	G	G	190.9	5	5
comp95918_c0_seq1	1106	G	T	T	235.48	6	6
comp95918_c0_seq1	1135	T	G	K	37.91	6	2
comp71532_c0_seq1	63	A	G	G	14.88	1	1
comp71532_c0_seq1	1280	C	A	M	52.56	10	3
comp71532_c0_seq1	1281	T	A	W	52.56	10	3
comp71532_c0_seq1	1282	G	T	K	52.56	10	3
comp2869_c0_seq1	59	T	A	A	10.43	1	1
comp96319_c0_seq1	145	G	T	T	1207.84	34	34
comp96319_c0_seq1	178	T	A	A	1274.95	33	33
comp96319_c0_seq1	457	G	A	A	816.86	20	20
comp96319_c0_seq1	805	G	A	A	1080.53	28	28
comp96319_c0_seq1	1048	T	C	C	1085.45	32	32
comp96319_c0_seq1	1179	C	T	T	990.71	25	25
comp96319_c0_seq1	1795	C	T	T	593.16	15	15
comp96319_c0_seq1	1892	A	G	G	682.67	17	17
comp96319_c0_seq1	2041	T	G	G	324.85	8	8
comp96319_c0_seq1	2066	G	A	A	102.15	3	3
comp62601_c0_seq1	18	G	T	T	14.88	1	1
comp62601_c0_seq1	95	C	T	T	14.88	1	1
comp702034_c0_seq1	376	A	T	W	41.4	6	2
comp39833_c0_seq1	313	T	G	G	14.16	1	1
comp39833_c0_seq1	475	A	C	C	14.42	1	1
comp92320_c1_seq1	31	T	C	C	58.21	2	2
comp92320_c1_seq1	188	A	G	G	14.92	2	2
comp92320_c1_seq1	505	C	T	T	102.19	4	4
comp92320_c1_seq1	581	C	T	T	146.42	4	4
comp88217_c0_seq1	126	A	G	G	102.15	3	3
comp88217_c0_seq1	179	G	T	T	1387.2	37	37
comp88217_c0_seq1	367	G	T	T	1181.43	30	30
comp88217_c0_seq1	368	A	T	T	1185.44	30	30
comp88217_c0_seq1	389	A	G	G	1252.44	33	33
comp88217_c0_seq1	519	G	T	T	2001.01	54	54
comp88217_c0_seq1	872	T	C	C	2627.89	68	68
comp88217_c0_seq1	1781	T	G	K	133.92	13	5
comp88217_c0_seq1	1782	A	G	R	33.67	8	2
comp88217_c0_seq1	1783	A	G	R	28.95	8	2
comp88217_c0_seq1	2141	T	C	C	14.88	1	1
comp88217_c0_seq1	2203	T	C	C	58.21	2	2
comp88636_c0_seq1	222	A	T	T	14.88	1	1
comp96764_c4_seq1	91	T	C	Y	174.58	19	8
comp96764_c4_seq1	146	A	T	W	356.97	26	13
comp96764_c4_seq1	159	A	G	R	457.11	32	17
comp96764_c4_seq1	163	G	A	R	497.17	34	19
comp96764_c4_seq1	189	A	T	W	142.41	30	7
comp96764_c4_seq1	192	G	A	R	111.98	29	6
comp96764_c4_seq1	194	G	A	R	67.26	29	5
comp96764_c4_seq1	204	A	G	R	133.38	34	7
comp96764_c4_seq1	213	G	A	R	145.39	30	7
comp96764_c4_seq1	244	G	A	R	577.2	28	20
comp96764_c4_seq1	259	A	G	R	425.79	22	16
comp96764_c4_seq1	269	G	A	R	395.32	20	14
comp96764_c4_seq1	356	A	T	W	187.24	20	9
comp96764_c4_seq1	369	C	T	Y	187.24	21	9
comp96764_c4_seq1	370	T	G	K	187.24	21	9
comp96764_c4_seq1	381	T	C	Y	123.38	23	7
comp96764_c4_seq1	395	T	C	Y	263.76	28	12
comp96764_c4_seq1	416	T	C	Y	245.08	25	11
comp96764_c4_seq1	436	G	A	R	260.75	27	12
comp96764_c4_seq1	445	A	G	R	260.75	26	12
comp96764_c4_seq1	452	T	C	Y	291.17	27	13
comp96764_c4_seq1	456	T	C	Y	291.17	27	13
comp96764_c4_seq1	473	C	T	Y	333.64	31	16
comp96764_c4_seq1	476	C	T	Y	358.28	30	17
comp96764_c4_seq1	486	A	G	R	480.57	38	21
comp96764_c4_seq1	506	G	A	R	486.89	43	21
comp96764_c4_seq1	510	T	C	Y	456.77	45	18
comp96764_c4_seq1	542	T	A	W	52.87	49	8
comp96764_c4_seq1	554	C	T	Y	369.41	47	15
comp96764_c4_seq1	581	C	T	Y	215.68	31	10
comp610820_c0_seq1	363	T	C	C	58.21	2	2
comp610820_c0_seq1	519	T	A	A	14.92	2	2
comp610820_c0_seq1	598	A	G	G	14.88	1	1
comp610820_c0_seq1	602	C	A	A	14.88	1	1
comp86515_c2_seq1	95	T	C	C	14.88	1	1
comp86515_c2_seq1	136	G	A	A	46.92	2	2
comp86515_c2_seq1	187	G	A	A	46.92	2	2
comp68140_c0_seq1	473	T	C	C	12.05	1	1
comp94620_c0_seq1	192	G	T	T	14.88	1	1
comp94620_c0_seq1	354	C	T	T	102.19	4	4
comp94004_c0_seq1	134	T	C	Y	25.4	6	2
comp94004_c0_seq1	135	C	T	Y	22.4	7	2
comp94004_c0_seq1	141	G	A	R	22.4	7	2
comp94004_c0_seq1	318	A	G	R	166.58	9	5
comp94004_c0_seq1	321	G	A	R	221.68	9	7
comp94004_c0_seq1	326	T	C	Y	124.87	8	4
comp94004_c0_seq1	372	A	G	R	131.15	12	7
comp94004_c0_seq1	415	A	G	R	21.61	6	2
comp103538_c1_seq1	152	A	G	G	46.92	2	2
comp103538_c1_seq1	515	C	T	Y	44.41	5	2
comp103538_c1_seq1	554	T	C	Y	44.41	7	2
comp103538_c1_seq1	1237	C	T	Y	43.93	4	2
comp103538_c1_seq1	1255	A	G	R	89.1	5	3
comp103538_c1_seq1	1303	A	G	R	86.05	8	4
comp103538_c1_seq1	1372	A	G	R	77.85	6	3
comp103538_c1_seq1	1385	C	T	Y	39.14	3	2
comp103538_c1_seq1	1491	T	C	Y	34.49	8	3
comp103538_c1_seq1	1500	C	A	M	37.5	7	3
comp103538_c1_seq1	1501	A	G	R	37.5	7	3
comp103538_c1_seq1	1521	T	C	Y	37.5	9	3
comp103538_c1_seq1	1524	G	A	R	37.5	9	3
comp103538_c1_seq1	1616	A	T	W	13.3	4	2
comp103538_c1_seq1	1768	A	G	G	14.92	2	2
comp103538_c1_seq1	1789	T	C	Y	50.44	3	2
comp103538_c1_seq1	1868	A	G	R	47.42	5	2
comp103538_c1_seq1	1888	G	T	K	50.43	3	2
comp103538_c1_seq1	1892	C	T	Y	46.94	3	2
comp103538_c1_seq1	2231	C	T	Y	74.84	6	3
comp103538_c1_seq1	2290	C	T	Y	62.8	11	3
comp103538_c1_seq1	2294	C	T	Y	18.14	11	2
comp103538_c1_seq1	2304	T	A	W	21.11	11	2
comp103538_c1_seq1	2539	G	A	R	82.68	7	4
comp103538_c1_seq1	2749	T	C	Y	150.87	23	6
comp103538_c1_seq1	2750	C	T	Y	27.99	23	3
comp103538_c1_seq1	2989	G	T	T	49.75	3	3
comp103538_c1_seq1	2990	T	G	K	38.93	4	3
comp103538_c1_seq1	2991	G	A	R	38.93	4	3
comp103538_c1_seq1	2992	C	A	A	81.85	4	4
comp100941_c0_seq1	52	T	C	Y	36.68	8	2
comp100941_c0_seq1	54	A	T	W	36.68	8	2
comp100941_c0_seq1	92	A	G	R	111.04	14	4
comp100941_c0_seq1	209	T	C	Y	117.15	10	5
comp100941_c0_seq1	401	G	A	R	217.9	15	7
comp100941_c0_seq1	403	T	C	Y	218.28	15	7
comp100941_c0_seq1	404	G	T	K	218.38	15	7
comp100941_c0_seq1	544	A	T	W	761.9	57	22
comp100941_c0_seq1	750	T	C	Y	623.66	43	25
comp100941_c0_seq1	806	T	C	Y	860.54	48	25
comp100941_c0_seq1	825	G	A	R	643.61	49	22
comp100941_c0_seq1	1332	A	G	R	776.21	38	24
comp100941_c0_seq1	1512	A	G	R	726.63	34	20
comp100941_c0_seq1	1646	T	C	Y	920.19	48	29
comp100941_c0_seq1	2099	G	A	R	675.81	38	19
comp100941_c0_seq1	2139	T	C	Y	514.67	29	15
comp100941_c0_seq1	2285	T	C	Y	639.99	35	19
comp100941_c0_seq1	2526	C	T	Y	309.43	24	11
comp100941_c0_seq1	2601	G	A	R	184.23	19	7
comp100941_c0_seq1	2991	G	A	R	250.12	16	10
comp100941_c0_seq1	3173	T	G	K	297.35	28	10
comp100941_c0_seq1	3273	C	T	Y	333.07	32	12
comp100941_c0_seq1	3310	G	A	R	145.53	19	6
comp100941_c0_seq1	3466	A	T	W	155.3	11	6
comp424427_c0_seq1	174	A	G	G	14.88	1	1
comp424427_c0_seq1	197	G	A	A	14.88	1	1
comp77110_c0_seq1	6	C	T	T	10.43	1	1
comp101464_c0_seq1	157	A	T	T	749.4	18	18
comp101464_c0_seq1	363	T	C	C	737.71	18	18
comp101464_c0_seq1	368	T	A	A	872.39	21	21
comp101464_c0_seq1	389	A	G	G	1150.92	28	28
comp101464_c0_seq1	448	A	G	G	1521.51	43	43
comp101464_c0_seq1	705	G	A	A	1840.94	46	46
comp101464_c0_seq1	841	A	G	G	1443.1	36	36
comp101464_c0_seq1	1183	A	G	G	1711.54	43	43
comp101464_c0_seq1	1386	G	A	A	1236.71	34	34
comp101464_c0_seq1	1431	T	C	C	1461.56	42	42
comp101464_c0_seq1	1443	T	C	C	1092.9	33	33
comp101464_c0_seq1	1450	C	T	Y	211.43	42	11
comp101464_c0_seq1	1454	T	C	Y	202.4	45	11
comp101464_c0_seq1	1618	A	G	G	2246.32	59	59
comp101464_c0_seq1	1707	A	T	T	1409.23	37	37
comp101464_c0_seq1	1752	A	G	G	1342.15	34	34
comp101464_c0_seq1	1771	T	G	G	1342.43	35	35
comp101464_c0_seq1	1786	C	T	T	1217.36	30	30
comp101464_c0_seq1	1825	A	G	G	906.36	23	23
comp101464_c0_seq1	1914	A	T	T	1655.56	45	45
comp101464_c0_seq1	1945	A	T	T	1834.52	48	48
comp101464_c0_seq1	1978	A	G	G	1610.98	47	47
comp101464_c0_seq1	2023	A	C	C	1845.55	42	42
comp101464_c0_seq1	2167	G	C	C	1565.41	43	43
comp101464_c0_seq1	2314	G	C	C	1252.85	31	31
comp101464_c0_seq1	2525	T	A	A	14.88	1	1
comp101464_c0_seq1	2527	G	A	A	14.88	1	1
comp61379_c0_seq1	280	G	T	K	324.25	77	13
comp61379_c0_seq1	283	G	C	S	102.52	68	7
comp103496_c0_seq1	64	A	T	T	419.95	12	12
comp103496_c0_seq1	102	A	G	G	419.95	12	12
comp103496_c0_seq1	103	G	A	A	419.95	12	12
comp103496_c0_seq1	174	T	C	C	558.41	16	16
comp103496_c0_seq1	223	T	G	G	234.5	8	8
comp103496_c0_seq1	241	G	C	C	134.43	5	5
comp103496_c0_seq1	262	C	T	T	68.27	3	3
comp103496_c0_seq1	277	T	A	A	122.18	5	5
comp103496_c0_seq1	299	G	C	C	217.05	8	8
comp103496_c0_seq1	336	A	G	G	250.47	9	9
comp103496_c0_seq1	339	C	G	G	250.47	9	9
comp103496_c0_seq1	384	A	T	T	132.42	6	6
comp103496_c0_seq1	385	A	G	G	110.89	5	5
comp103496_c0_seq1	386	C	T	T	110.89	5	5
comp103496_c0_seq1	387	A	T	T	110.89	5	5
comp103496_c0_seq1	394	G	A	A	187.42	8	8
comp103496_c0_seq1	404	G	A	A	242.49	10	10
comp103496_c0_seq1	415	C	T	T	275.91	11	11
comp103496_c0_seq1	455	C	T	T	309.35	12	12
comp103496_c0_seq1	462	A	C	M	142.66	12	8
comp103496_c0_seq1	484	C	T	T	383.71	13	13
comp103496_c0_seq1	538	A	G	G	560.81	20	20
comp103496_c0_seq1	550	C	T	T	539.11	19	19
comp103496_c0_seq1	574	G	A	A	399.3	16	15
comp103496_c0_seq1	580	A	C	C	187.42	8	8
comp103496_c0_seq1	595	G	A	R	41.35	28	5
comp103496_c0_seq1	630	G	A	A	822.07	26	26
comp103496_c0_seq1	667	C	A	A	837.26	29	29
comp103496_c0_seq1	677	A	G	G	854.04	30	30
comp103496_c0_seq1	686	A	T	T	783.5	25	25
comp103496_c0_seq1	759	G	A	A	167.26	6	6
comp103496_c0_seq1	765	T	C	C	23.88	2	2
comp103496_c0_seq1	793	G	A	A	14.52	1	1
comp103496_c0_seq1	811	A	G	G	34.79	2	2
comp103496_c0_seq1	816	C	A	A	34.79	2	2
comp103496_c0_seq1	849	A	T	T	34.79	2	2
comp103496_c0_seq1	886	T	C	C	89.48	4	4
comp103496_c0_seq1	903	T	C	C	68.27	3	3
comp103496_c0_seq1	994	C	T	T	190.41	8	8
comp103496_c0_seq1	1051	A	G	R	25.43	6	2
comp103496_c0_seq1	1080	T	C	Y	10.49	5	2
comp103496_c0_seq1	1089	G	T	K	21.86	5	2
comp103496_c0_seq1	1093	A	G	R	21.86	5	2
comp103496_c0_seq1	1096	G	A	R	21.86	5	2
comp103496_c0_seq1	1103	G	T	K	40.51	6	3
comp103496_c0_seq1	1111	C	T	Y	40.51	6	3
comp103496_c0_seq1	1112	G	A	R	40.51	6	3
comp103496_c0_seq1	1119	T	A	W	40.51	6	3
comp103496_c0_seq1	1129	A	G	R	65.43	6	3
comp103496_c0_seq1	1132	C	A	M	10.49	5	2
comp103496_c0_seq1	1133	C	T	Y	10.49	5	2
comp103496_c0_seq1	1142	C	T	T	23.88	2	2
comp84518_c0_seq1	270	A	C	M	21.66	12	2
comp511112_c0_seq1	229	T	A	A	14.88	1	1
comp101394_c0_seq1	242	A	C	C	3864.34	100	100
comp101394_c0_seq1	768	T	C	C	5264.07	144	144
comp101394_c0_seq1	2074	T	C	C	7407.78	198	198
comp101394_c0_seq1	2152	C	T	T	6133.29	166	166
comp101394_c0_seq1	2289	C	T	T	4894.52	130	129
comp101394_c0_seq1	2311	G	A	A	3097.03	85	85
comp101394_c0_seq1	2315	T	C	C	3089.32	85	85
comp101394_c0_seq1	2334	C	T	T	2819.45	80	79
comp101394_c0_seq1	2340	G	T	T	3044.39	83	83
comp101394_c0_seq1	2397	A	C	C	3971.78	106	106
comp101394_c0_seq1	2463	C	G	G	2437.33	75	75
comp101394_c0_seq1	2478	C	T	T	2168.89	67	67
comp101394_c0_seq1	2480	G	A	A	2168.88	66	66
comp101394_c0_seq1	2504	T	A	A	1443.24	46	46
comp101394_c0_seq1	2525	C	G	G	1208.3	41	41
comp101394_c0_seq1	2543	C	A	A	543.38	19	19
comp101394_c0_seq1	2545	A	G	G	543.38	19	19
comp101394_c0_seq1	2554	A	G	G	387.98	14	14
comp101394_c0_seq1	2614	G	A	A	35.63	2	2
comp101394_c0_seq1	2631	T	A	A	35.63	2	2
comp88560_c0_seq1	142	G	A	R	451.97	75	18
comp88560_c0_seq1	359	A	G	R	2263.62	200	69
comp88560_c0_seq1	388	A	G	R	2435.69	200	73
comp88560_c0_seq1	475	T	C	Y	2365.68	200	70
comp88560_c0_seq1	482	G	C	S	2103	200	62
comp88560_c0_seq1	592	A	G	R	2162.52	200	68
comp88560_c0_seq1	607	C	A	M	1904.99	200	64
comp88560_c0_seq1	732	G	A	R	1774.86	144	61
comp88560_c0_seq1	745	G	A	R	370.76	90	15
comp81222_c0_seq1	93	G	A	R	92.19	5	4
comp102317_c0_seq1	95	T	C	C	1323.29	38	38
comp102317_c0_seq1	144	C	T	T	1147.9	31	31
comp102317_c0_seq1	146	C	T	T	1187.79	31	31
comp102317_c0_seq1	211	C	T	T	1147.19	37	37
comp102317_c0_seq1	257	A	T	T	675.62	19	19
comp102317_c0_seq1	266	C	T	T	630.89	18	18
comp102317_c0_seq1	283	G	A	A	501.43	15	15
comp102317_c0_seq1	307	G	C	C	311.23	11	11
comp102317_c0_seq1	343	T	C	C	263.66	8	8
comp102317_c0_seq1	354	A	G	G	437.82	12	12
comp102317_c0_seq1	479	T	G	G	680.67	19	19
comp102317_c0_seq1	508	A	G	G	472.55	14	14
comp102317_c0_seq1	520	T	A	W	366.56	15	12
comp102317_c0_seq1	530	T	G	G	541.91	16	16
comp102317_c0_seq1	592	C	T	T	658.75	20	20
comp102317_c0_seq1	654	T	C	Y	418.72	21	15
comp102317_c0_seq1	675	T	A	W	90.64	57	9
comp102317_c0_seq1	676	T	G	K	81.61	60	9
comp102317_c0_seq1	682	C	T	Y	57.54	69	9
comp102317_c0_seq1	683	A	T	W	38.85	68	8
comp102317_c0_seq1	685	G	C	S	1455.16	68	44
comp102317_c0_seq1	687	A	T	W	38.85	68	8
comp102317_c0_seq1	837	C	T	Y	204.07	59	13
comp102317_c0_seq1	862	A	T	W	240.51	53	14
comp102317_c0_seq1	901	T	C	Y	238.42	54	15
comp102317_c0_seq1	984	A	G	R	609.63	42	18
comp102317_c0_seq1	995	G	T	K	41.57	44	7
comp102317_c0_seq1	1052	A	G	R	278.66	63	15
comp102317_c0_seq1	1054	C	T	Y	290.7	59	15
comp102317_c0_seq1	1073	T	C	Y	202.96	59	12
comp102317_c0_seq1	1118	A	T	W	74.62	51	7
comp102317_c0_seq1	1119	A	G	R	77.63	50	7
comp102317_c0_seq1	1286	A	G	R	41.8	52	7
comp102317_c0_seq1	1293	A	G	R	29.77	55	7
comp102317_c0_seq1	1302	C	T	Y	50.84	48	7
comp102317_c0_seq1	1305	G	T	K	59.87	45	7
comp102317_c0_seq1	1356	G	A	R	194.36	73	13
comp102317_c0_seq1	1398	T	C	Y	287.42	78	16
comp102317_c0_seq1	1428	T	A	W	122.54	88	12
comp102317_c0_seq1	1515	T	A	W	35.79	53	7
comp102317_c0_seq1	1534	C	A	M	108.38	60	9
comp102317_c0_seq1	1537	A	C	M	111.39	56	9
comp102317_c0_seq1	1556	C	T	Y	240.3	53	12
comp102317_c0_seq1	1585	A	G	R	477.73	66	21
comp102317_c0_seq1	1589	C	T	Y	529.55	71	23
comp102317_c0_seq1	1675	C	G	S	364.93	70	20
comp102317_c0_seq1	1690	G	A	R	316.74	72	19
comp102317_c0_seq1	1691	A	T	W	319.75	71	19
comp102317_c0_seq1	1702	T	C	Y	326.89	65	19
comp102317_c0_seq1	1739	A	G	R	261.46	72	18
comp102317_c0_seq1	1743	C	T	Y	252.43	76	18
comp102317_c0_seq1	1747	C	T	Y	264.47	72	18
comp102317_c0_seq1	1753	T	G	K	280.44	69	19
comp102317_c0_seq1	1772	G	C	S	92.42	49	10
comp102317_c0_seq1	1774	C	T	Y	95.43	48	10
comp102317_c0_seq1	1779	T	C	Y	95.43	47	10
comp102317_c0_seq1	1819	A	G	R	198.72	58	13
comp102317_c0_seq1	1827	A	G	R	247.83	57	15
comp102317_c0_seq1	1846	A	G	R	250.84	54	15
comp102317_c0_seq1	1871	T	C	Y	398.24	71	20
comp102317_c0_seq1	1892	C	T	Y	309.27	57	15
comp102317_c0_seq1	1895	T	C	Y	316.06	54	15
comp102317_c0_seq1	1924	A	T	W	582.05	59	23
comp102317_c0_seq1	1949	C	T	Y	595.8	55	24
comp102317_c0_seq1	1980	C	T	Y	598.71	77	25
comp102317_c0_seq1	2043	C	A	M	76.19	78	10
comp102317_c0_seq1	2045	G	A	R	85.22	76	10
comp102317_c0_seq1	2050	A	T	W	76.19	75	10
comp102317_c0_seq1	2085	C	A	M	59.02	83	9
comp102317_c0_seq1	2160	G	A	R	348.72	68	17
comp102317_c0_seq1	2187	G	C	S	58.86	51	6
comp102317_c0_seq1	2254	A	C	M	160.23	65	11
comp102317_c0_seq1	2291	A	T	W	163.88	70	12
comp102317_c0_seq1	2297	A	T	W	103.03	67	10
comp102317_c0_seq1	2298	A	T	W	106.04	66	10
comp102317_c0_seq1	2308	G	A	R	236.47	71	14
comp102317_c0_seq1	2309	C	T	Y	236.47	71	14
comp102317_c0_seq1	2320	T	A	W	472.25	80	22
comp102317_c0_seq1	2357	C	T	Y	826.33	55	28
comp102317_c0_seq1	2375	A	G	R	952.87	61	33
comp102317_c0_seq1	2383	T	C	Y	730.31	55	26
comp102317_c0_seq1	2400	T	C	Y	552.36	42	21
comp102317_c0_seq1	2405	G	C	S	487.92	39	19
comp102317_c0_seq1	2415	A	G	R	65.31	35	6
comp102317_c0_seq1	2420	A	G	R	511.99	31	19
comp102317_c0_seq1	2429	T	C	Y	475.55	32	18
comp102317_c0_seq1	2434	T	C	Y	478.55	31	18
comp102317_c0_seq1	2436	A	G	R	478.55	31	18
comp102317_c0_seq1	2452	G	A	R	43.91	32	5
comp102317_c0_seq1	2454	T	C	Y	262.57	26	12
comp87792_c0_seq1	480	C	A	A	46.96	3	3
comp367410_c0_seq1	576	A	T	T	14.52	1	1
comp90068_c0_seq1	103	T	C	C	280.2	8	8
comp90068_c0_seq1	577	A	G	G	46.92	2	2
comp90068_c0_seq1	641	C	T	T	79.56	3	3
comp104470_c0_seq1	72	A	T	W	71.08	14	3
comp104470_c0_seq1	1140	A	C	C	14.88	1	1
comp104470_c0_seq1	1141	G	C	C	14.88	1	1
comp26944_c0_seq1	45	T	C	Y	35.38	8	2
comp97606_c1_seq1	607	C	A	A	358.44	13	13
comp97606_c1_seq1	638	C	T	T	324.94	10	10
comp97606_c1_seq1	784	G	A	A	358.24	9	9
comp97606_c1_seq1	863	G	T	T	302.28	9	9
comp97606_c1_seq1	913	G	A	A	279.61	8	8
comp97606_c1_seq1	922	A	G	G	234.98	7	7
comp97606_c1_seq1	973	C	T	T	212.91	6	6
comp97606_c1_seq1	1058	A	G	G	252.85	7	7
comp97606_c1_seq1	1123	T	C	C	436.46	12	12
comp97606_c1_seq1	1373	C	A	A	280.2	8	8
comp97606_c1_seq1	1518	G	A	A	190.94	6	6
comp97606_c1_seq1	1737	C	T	T	133.95	5	5
comp97606_c1_seq1	1767	T	C	C	155.96	6	6
comp97606_c1_seq1	1778	A	G	G	189.33	7	7
comp97606_c1_seq1	1781	C	T	T	189.33	7	7
comp97606_c1_seq1	1887	G	A	A	156.99	5	5
comp97606_c1_seq1	1903	A	T	T	201.61	6	6
comp97606_c1_seq1	2273	G	A	A	14.82	1	1
comp97606_c1_seq1	2311	G	T	T	14.88	1	1
comp97606_c1_seq1	2313	A	G	G	14.88	1	1
comp97606_c1_seq1	2317	G	T	T	14.92	2	2
comp84832_c0_seq1	1013	A	G	G	14.92	2	2
comp103181_c0_seq1	19	C	A	A	90.85	3	3
comp103181_c0_seq1	25	C	T	T	130.4	4	4
comp103181_c0_seq1	49	T	C	C	130.4	4	4
comp103181_c0_seq1	176	C	A	M	22.48	12	3
comp103181_c0_seq1	178	A	G	R	12.34	12	2
comp103181_c0_seq1	207	A	G	R	191.58	15	6
comp103181_c0_seq1	208	G	T	K	67.75	15	5
comp103181_c0_seq1	210	C	T	Y	185.62	17	6
comp103181_c0_seq1	232	G	A	R	144.57	15	8
comp103181_c0_seq1	238	G	A	R	108.12	16	7
comp103181_c0_seq1	273	A	G	R	436.69	24	17
comp103181_c0_seq1	280	C	T	Y	155.02	19	9
comp103181_c0_seq1	281	A	G	R	155.02	19	9
comp103181_c0_seq1	297	A	T	W	41.18	23	4
comp103181_c0_seq1	333	A	G	R	44.9	17	4
comp103181_c0_seq1	337	G	A	R	130.61	16	8
comp103181_c0_seq1	353	A	T	W	224.5	15	9
comp103181_c0_seq1	369	A	G	R	298.91	20	11
comp103181_c0_seq1	395	T	C	Y	84.22	18	6
comp103181_c0_seq1	397	G	A	R	84.22	18	6
comp103181_c0_seq1	419	C	T	Y	59.52	19	5
comp103181_c0_seq1	434	T	C	Y	38.12	16	4
comp103181_c0_seq1	442	T	C	Y	200.51	14	9
comp103181_c0_seq1	444	G	A	R	133.64	14	7
comp103181_c0_seq1	457	T	A	W	50.16	11	4
comp103181_c0_seq1	556	G	A	R	41.4	6	2
comp103181_c0_seq1	803	T	C	Y	31.78	5	3
comp103181_c0_seq1	817	C	T	Y	34.8	4	3
comp103181_c0_seq1	845	A	G	R	28.77	6	3
comp103181_c0_seq1	1111	T	A	A	81.41	3	3
comp72181_c0_seq1	799	G	A	A	14.88	1	1
comp192592_c0_seq1	325	T	G	G	11.01	1	1
comp192592_c0_seq1	643	T	A	A	14.92	2	2
comp103442_c1_seq1	232	C	T	Y	154.75	159	20
comp103442_c1_seq1	233	A	C	M	142.7	162	20
comp103442_c1_seq1	250	G	T	K	544.59	193	33
comp103442_c1_seq1	261	T	C	Y	399.05	200	29
comp103442_c1_seq1	270	C	T	Y	796.81	200	42
comp103442_c1_seq1	306	T	G	K	4023.2	175	120
comp103442_c1_seq1	364	A	C	M	430.19	148	29
comp103442_c1_seq1	387	C	A	M	508.1	135	24
comp103442_c1_seq1	461	G	A	R	69.8	43	6
comp103442_c1_seq1	503	G	A	R	61.94	30	5
comp103442_c1_seq1	516	T	C	Y	76.27	28	5
comp103442_c1_seq1	552	A	T	W	496.55	22	16
comp103442_c1_seq1	556	A	G	R	417.84	20	14
comp103442_c1_seq1	576	G	A	R	106.64	11	5
comp103442_c1_seq1	588	C	T	Y	70.94	8	4
comp103442_c1_seq1	600	A	G	R	24.85	5	2
comp103442_c1_seq1	602	G	A	R	24.85	5	2
comp103442_c1_seq1	613	G	T	K	24.85	4	2
comp103442_c1_seq1	648	T	C	Y	13.3	5	2
comp103442_c1_seq1	653	G	A	R	57.87	5	4
comp103442_c1_seq1	658	G	T	K	13.3	5	2
comp103442_c1_seq1	677	A	G	R	127	8	6
comp103442_c1_seq1	706	A	T	W	45.78	9	3
comp103442_c1_seq1	771	G	T	K	38.43	9	3
comp103442_c1_seq1	785	C	G	S	80.15	11	4
comp103442_c1_seq1	791	G	A	R	166.6	11	6
comp103442_c1_seq1	837	G	T	K	98.54	14	5
comp103442_c1_seq1	873	G	A	R	101.5	13	4
comp103442_c1_seq1	890	C	T	Y	56.82	17	4
comp103442_c1_seq1	979	T	G	K	35.38	9	2
comp103442_c1_seq1	1004	A	T	W	35.38	9	2
comp103442_c1_seq1	1068	A	C	M	44.41	5	2
comp103442_c1_seq1	1103	T	A	W	50.43	3	2
comp103442_c1_seq1	1190	G	A	R	93.97	7	4
comp103442_c1_seq1	1255	C	T	Y	90.97	8	4
comp103442_c1_seq1	1288	C	T	Y	90.97	8	4
comp103442_c1_seq1	1330	C	T	T	68.27	3	3
comp103442_c1_seq1	1331	A	G	G	68.27	3	3
comp103442_c1_seq1	1338	A	G	R	27.86	3	2
comp103442_c1_seq1	1339	A	G	G	35.63	2	2
comp103442_c1_seq1	1352	G	A	A	35.63	2	2
comp103442_c1_seq1	1359	G	T	T	35.63	2	2
comp103442_c1_seq1	1410	G	A	A	35.63	2	2
comp103442_c1_seq1	1423	T	C	Y	27.86	3	2
comp103442_c1_seq1	1432	G	A	A	112.54	4	4
comp103442_c1_seq1	1476	T	C	Y	110.58	10	5
comp103442_c1_seq1	1507	A	T	W	62.81	13	3
comp103442_c1_seq1	1510	A	T	T	354.13	13	13
comp103442_c1_seq1	1516	G	C	S	170.68	12	8
comp103442_c1_seq1	1555	G	T	K	89.42	11	4
comp103442_c1_seq1	1579	G	A	R	12.27	9	2
comp103442_c1_seq1	1606	G	A	R	24.11	9	2
comp103442_c1_seq1	1624	A	T	W	43.23	9	3
comp103442_c1_seq1	1625	T	G	K	40.22	10	3
comp103442_c1_seq1	1640	A	T	W	40.22	10	3
comp103442_c1_seq1	1645	G	A	R	10.23	9	2
comp103442_c1_seq1	1648	T	C	Y	10.23	9	2
comp103442_c1_seq1	1678	C	T	Y	10.23	9	2
comp103442_c1_seq1	2373	T	G	K	23.36	15	2
comp90666_c0_seq1	385	A	G	R	13.56	75	6
comp90666_c0_seq1	423	C	T	T	3597.26	85	85
comp90666_c0_seq1	1821	A	G	G	1741.22	43	43
comp90666_c0_seq1	1992	A	G	G	2501.51	62	62
comp13449_c0_seq1	246	G	C	C	14.88	1	1
comp13449_c0_seq1	262	C	G	G	14.87	1	1
comp100707_c0_seq1	190	T	C	Y	53.77	42	8
comp100707_c0_seq1	214	A	T	W	28.48	35	6
comp100707_c0_seq1	249	T	C	Y	38.09	41	7
comp100707_c0_seq1	382	T	C	Y	44.94	44	7
comp100707_c0_seq1	387	T	C	Y	36.46	48	7
comp100707_c0_seq1	420	C	G	S	130.75	49	10
comp100707_c0_seq1	463	T	G	K	59.31	36	6
comp100707_c0_seq1	648	G	T	K	239.82	45	11
comp100707_c0_seq1	654	G	T	K	67.59	44	6
comp100707_c0_seq1	690	G	A	R	61.83	39	6
comp100707_c0_seq1	735	C	T	Y	142.2	32	7
comp100707_c0_seq1	740	C	T	Y	98.22	25	6
comp100707_c0_seq1	744	T	C	Y	98.22	25	6
comp100707_c0_seq1	754	C	A	M	51.86	27	4
comp100707_c0_seq1	836	T	C	Y	118.25	22	6
comp100707_c0_seq1	873	C	A	M	189.06	24	8
comp100707_c0_seq1	894	A	T	W	161.61	20	6
comp100707_c0_seq1	934	C	T	Y	212.81	31	11
comp100707_c0_seq1	1031	G	A	R	333.42	30	12
comp100707_c0_seq1	1049	A	G	R	219.56	27	9
comp100707_c0_seq1	1068	T	C	Y	40.55	24	4
comp100707_c0_seq1	1070	T	G	K	177.04	24	8
comp100707_c0_seq1	1153	A	C	M	235.12	26	9
comp100707_c0_seq1	1191	T	C	Y	211.67	26	10
comp100707_c0_seq1	1212	T	C	Y	254.33	29	11
comp100707_c0_seq1	1226	C	T	Y	141.88	26	7
comp100707_c0_seq1	1284	A	G	R	106.17	24	5
comp100707_c0_seq1	1656	T	C	Y	21.69	17	3
comp100707_c0_seq1	1680	T	A	W	24.72	16	3
comp100707_c0_seq1	1696	T	A	W	13.61	17	3
comp100707_c0_seq1	1712	C	A	M	112.98	21	6
comp100707_c0_seq1	1738	T	C	Y	442.07	57	17
comp100707_c0_seq1	1764	T	G	K	971.12	86	34
comp100707_c0_seq1	1808	T	C	Y	1282.33	108	47
comp100707_c0_seq1	1863	T	G	K	700.04	91	29
comp100707_c0_seq1	1865	T	G	K	761.13	90	31
comp100707_c0_seq1	1882	T	A	W	181.9	66	12
comp100707_c0_seq1	1885	A	C	M	175.88	69	12
comp100707_c0_seq1	1890	T	A	W	364.47	77	19
comp100707_c0_seq1	1897	C	T	Y	517.44	80	24
comp100707_c0_seq1	1953	T	G	K	678.75	83	28
comp100707_c0_seq1	1954	A	G	R	681.28	82	28
comp643788_c0_seq1	370	A	C	C	14.88	1	1
comp436_c0_seq1	617	T	C	C	14.88	1	1
comp95933_c0_seq1	123	A	G	G	14.88	1	1
comp95933_c0_seq1	1566	C	T	T	58.21	2	2
comp95933_c0_seq1	1962	T	C	C	58.21	2	2
comp95933_c0_seq1	2400	G	C	C	14.88	1	1
comp95933_c0_seq1	2821	A	T	T	14.88	1	1
comp95933_c0_seq1	2855	T	C	C	14.88	1	1
comp95933_c0_seq1	2875	C	G	G	14.88	1	1
comp95933_c0_seq1	3500	A	C	C	14.88	1	1
comp95933_c0_seq1	3521	C	T	T	14.88	1	1
comp95933_c0_seq1	3892	T	C	C	14.88	1	1
comp95933_c0_seq1	3909	C	A	A	14.88	1	1
comp95933_c0_seq1	4510	G	A	A	14.88	1	1
comp98303_c3_seq1	129	T	C	C	14.88	1	1
comp98303_c3_seq1	207	A	G	G	14.88	1	1
comp85217_c1_seq1	125	G	A	R	12.31	12	2
comp85217_c1_seq1	179	C	T	Y	15.19	13	2
comp73396_c0_seq1	19	A	T	T	10.43	1	1
comp73396_c0_seq1	21	C	G	G	10.43	1	1
comp73396_c0_seq1	22	C	T	T	10.43	1	1
comp85940_c0_seq1	817	G	A	R	14.84	46	4
comp85940_c0_seq1	904	A	C	M	171.92	70	9
comp118138_c0_seq1	747	T	C	Y	14.47	17	2
comp85950_c0_seq1	15	A	G	G	58.21	2	2
comp85950_c0_seq1	75	A	G	G	146.5	6	6
comp85950_c0_seq1	259	A	C	C	102.15	3	3
comp3329_c0_seq1	673	G	A	A	14.88	1	1
comp3329_c0_seq1	701	A	T	T	14.92	2	2
comp3329_c0_seq1	886	A	G	G	14.88	1	1
comp67900_c0_seq1	156	G	A	R	14.47	15	2
comp67900_c0_seq1	157	T	A	W	14.47	15	2
comp71949_c0_seq1	243	T	A	W	37.98	4	2
comp71949_c0_seq1	244	G	C	S	37.98	4	2
comp71949_c0_seq1	247	A	C	M	78	4	3
comp71949_c0_seq1	410	C	A	M	19.97	12	2
comp102241_c3_seq1	291	G	A	A	10.43	1	1
comp102241_c3_seq1	292	A	C	C	10.43	1	1
comp102241_c3_seq1	804	T	A	A	620.53	17	17
comp67247_c0_seq1	488	T	C	C	14.52	1	1
comp67247_c0_seq1	515	A	G	G	14.92	2	2
comp67247_c0_seq1	524	A	C	C	14.92	2	2
comp67247_c0_seq1	534	A	G	G	14.92	2	2
comp67247_c0_seq1	600	A	G	G	14.52	1	1
comp99326_c3_seq1	57	T	C	C	68.27	3	3
comp99326_c3_seq1	1136	T	C	Y	21.86	5	2
comp90412_c0_seq1	513	A	C	C	1029.01	27	27
comp90412_c0_seq1	780	A	C	C	1577.08	43	43
comp90412_c0_seq1	816	A	G	G	988.22	30	30
comp90412_c0_seq1	1007	A	G	G	1706.89	49	49
comp90412_c0_seq1	1125	C	G	G	503.55	13	13
comp90412_c0_seq1	1147	T	C	C	503.73	12	12
comp82017_c0_seq1	133	A	T	T	14.92	2	2
comp82017_c0_seq1	182	A	G	G	14.88	1	1
comp82017_c0_seq1	277	G	A	A	58.26	3	3
comp82017_c0_seq1	379	C	T	T	58.26	3	3
comp82017_c0_seq1	393	T	A	A	58.26	3	3
comp82017_c0_seq1	439	A	G	G	102.15	3	3
comp418010_c0_seq1	557	T	A	A	14.84	1	1
[truncated: 197,228 more rows]
